# Supplementary material for: Relationship between circadian genes and memory impairment caused by sleep deprivation
Source: PeerJ. 2022 Mar 21;10:e13165. doi: 10.7717/peerj.13165 (PMC8944342; doi:10.7717/peerj.13165)
Supplement: Supplemental Information 1 [file peerj-10-13165-s001.xlsx]

## Sheet: GSE33302
ID	adj.P.Val	P.Value	t	B	logFC	Gene.symbol	Gene.title
1436387_at	7.42e-06	1.64e-10	11.2545	13.3418	1.05425	Homer1	homer scaffolding protein 1
1442051_at	2.529e-05	2.11e-09	9.784	11.192	0.550517	Hist2h3b///Hist1h3e///Hist1h3b///Hist1h3d///Hist1h3c///Hist1h3f///Hist2h3c2///Hist2h3c1	histone cluster 2, H3b///histone cluster 1, H3e///histone cluster 1, H3b///histone cluster 1, H3d///histone cluster 1, H3c///histone cluster 1, H3f///histone cluster 2, H3c2///histone cluster 2, H3c1
1434817_s_at	2.529e-05	2.24e-09	-9.75073	11.1398	-0.841068	Rprd2	regulation of nuclear pre-mRNA domain containing 2
1419070_at	4.632e-05	6.16e-09	9.20695	10.2643	0.363024	Cys1	cystin 1
1419231_s_at	6.52e-05	1.01e-08	-8.94711	9.83029	-0.659622	Krt12	keratin 12
1418174_at	8.301e-05	1.47e-08	-8.75353	9.50021	-0.419239	Dbp	D site albumin promoter binding protein
1460314_s_at	0.00012152	2.42e-08	8.49987	9.05887	0.53566	Hist1h3a///Hist2h3b///Hist1h3i///Hist1h3h///Hist1h3e///Hist1h3b///Hist1h3d///Hist1h3c///Hist1h3f///Hist1h3g///Hist2h3c2///Hist2h3c1	histone cluster 1, H3a///histone cluster 2, H3b///histone cluster 1, H3i///histone cluster 1, H3h///histone cluster 1, H3e///histone cluster 1, H3b///histone cluster 1, H3d///histone cluster 1, H3c///histone cluster 1, H3f///histone cluster 1, H3g///histone cluster 2, H3c2///histone cluster 2, H3c1
1441075_at	0.00016996	3.77e-08	8.27921	8.66677	0.410291	Nostrin	nitric oxide synthase trafficker
1449039_a_at	0.00018244	4.45e-08	-8.19689	8.51851	-0.416551	Hnrnpdl	heterogeneous nuclear ribonucleoprotein D-like
1430068_at	0.000186	5.01e-08	-8.13884	8.41333	-0.491734	C030011L09Rik	RIKEN cDNA C030011L09 gene
1425231_a_at	0.000186	5.45e-08	-8.09683	8.33688	-0.389266	Zfp46	zinc finger protein 46
1457279_at	0.000186	5.8e-08	-8.06647	8.28146	-0.472626	Gm17586	predicted gene, 17586
1455039_a_at	0.000186	6.34e-08	-8.02279	8.20146	-0.489053	Sin3b	transcriptional regulator, SIN3B (yeast)
1437868_at	0.000186	6.6e-08	8.00338	8.16581	0.580592	Fam46a	family with sequence similarity 46, member A
1416064_a_at	0.00021792	8.21e-08	7.89689	7.96917	0.480917	Hspa5	heat shock protein 5
1436650_at	0.00025296	1.04e-07	-7.78396	7.7587	-0.431602	Filip1	filamin A interacting protein 1
1418322_at	0.00025296	1.07e-07	7.77125	7.73488	0.404178	Crem	cAMP responsive element modulator
1426612_at	0.0002613	1.23e-07	-7.70122	7.60319	-0.339906	Tipin	timeless interacting protein
1455531_at	0.0002613	1.25e-07	-7.69578	7.59293	-0.494598	Mfsd4a	major facilitator superfamily domain containing 4A
1448654_at	0.0002613	1.28e-07	-7.68321	7.56921	-0.332473	Mtch2	mitochondrial carrier 2
1416332_at	0.0002613	1.33e-07	-7.66418	7.53323	-0.679529	Cirbp	cold inducible RNA binding protein
1448478_at	0.00029603	1.58e-07	7.58448	7.38196	0.335249	Med20	mediator complex subunit 20
1428052_a_at	0.00032929	1.83e-07	7.51467	7.24862	0.555338	Zmym1	zinc finger, MYM domain containing 1
1421594_a_at	0.00035511	2.05e-07	-7.46053	7.14468	-0.431053	Sytl2	synaptotagmin-like 2
1430252_at	0.00037434	2.39e-07	-7.38733	7.00341	-0.549558	3110027N22Rik	RIKEN cDNA 3110027N22 gene
1430798_x_at	0.00037434	2.4e-07	-7.38627	7.00137	-0.520521	Mrpl15	mitochondrial ribosomal protein L15
1435935_at	0.00037434	2.46e-07	7.374	6.97761	0.376218	2410131K14Rik	RIKEN cDNA 2410131K14 gene
1452661_at	0.00037434	2.49e-07	-7.3685	6.96694	-0.357075	Tfrc	transferrin receptor
1452560_a_at	0.00051126	3.51e-07	7.20789	6.65357	0.37227	Nfya	nuclear transcription factor-Y alpha
1424251_a_at	0.00058823	4.18e-07	-7.12728	6.49477	-0.308362	Hnrnpdl	heterogeneous nuclear ribonucleoprotein D-like
1436978_at	0.00058823	4.32e-07	-7.11207	6.46468	-0.564012	Wnt9a	wingless-type MMTV integration site family, member 9A
1420093_s_at	0.00058823	4.43e-07	-7.10034	6.44147	-0.359039	Hnrnpdl	heterogeneous nuclear ribonucleoprotein D-like
1435867_at	0.00062544	5.26e-07	7.02176	6.28535	0.35348	Kdm7a	lysine (K)-specific demethylase 7A
1424674_at	0.00062544	5.37e-07	-7.01262	6.26715	-0.335012	Slc39a6	solute carrier family 39 (metal ion transporter), member 6
1438211_s_at	0.00062544	5.41e-07	-7.00892	6.25976	-0.501857	Dbp	D site albumin promoter binding protein
1422605_at	0.00062544	5.6e-07	-6.99292	6.22783	-0.315775	Ppp1r1a	protein phosphatase 1, regulatory (inhibitor) subunit 1A
1427359_at	0.00062544	5.64e-07	6.99029	6.22258	0.465537	Kdm7a	lysine (K)-specific demethylase 7A
1456161_at	0.00062544	5.77e-07	-6.97973	6.20147	-0.463353	0610040B10Rik	RIKEN cDNA 0610040B10 gene
1442001_at	0.00062544	5.78e-07	6.97852	6.19905	0.349234	Prkab2	protein kinase, AMP-activated, beta 2 non-catalytic subunit
1435030_at	0.00062544	5.82e-07	6.97518	6.19237	0.310152	Upf2	UPF2 regulator of nonsense transcripts homolog (yeast)
1429169_at	0.00067827	6.47e-07	6.9274	6.09664	0.417808	Gm15453///Rbm3	predicted gene 15453///RNA binding motif protein 3
1418937_at	0.00068372	6.74e-07	6.90826	6.0582	0.330504	Dio2	deiodinase, iodothyronine, type II
1425671_at	0.00068372	6.87e-07	6.89964	6.04087	0.481663	Homer1	homer scaffolding protein 1
1443790_x_at	0.00068372	6.97e-07	-6.89303	6.02757	-0.416761	Particl	promoter of Mat2a antisense radiation induced circulating long non-coding RNA
1452170_at	0.00074005	7.71e-07	-6.84727	5.93533	-0.464577	Chpf2	chondroitin polymerizing factor 2
1441693_at	0.00074246	7.9e-07	-6.83624	5.91304	-0.421075	Adamts3	a disintegrin-like and metallopeptidase (reprolysin type) with thrombospondin type 1 motif, 3
1419230_at	0.00084422	9.21e-07	-6.76683	5.77239	-0.484531	Krt12	keratin 12
1456698_s_at	0.00084422	9.78e-07	-6.73984	5.71751	-0.501486	Hnrnpdl	heterogeneous nuclear ribonucleoprotein D-like
1435874_at	0.00084422	9.79e-07	6.73928	5.71637	0.337652	Prkab2	protein kinase, AMP-activated, beta 2 non-catalytic subunit
1440883_at	0.00084422	9.9e-07	-6.73428	5.70618	-0.306869	Usp6nl	USP6 N-terminal like
1434223_at	0.00084422	9.92e-07	-6.73334	5.70428	-0.287932	LOC102643079///Oscp1	uncharacterized LOC102643079///organic solute carrier partner 1
1428630_x_at	0.00087852	1.05e-06	-6.70698	5.65054	-0.325042	Haghl	hydroxyacylglutathione hydrolase-like
1448705_at	0.00091729	1.13e-06	-6.67572	5.58667	-0.351917	Zbtb22	zinc finger and BTB domain containing 22
1420543_at	0.00091729	1.14e-06	6.67121	5.57744	0.350247	Dnajc28	DnaJ heat shock protein family (Hsp40) member C28
1428097_at	0.00096087	1.23e-06	-6.63702	5.50741	-0.251673	2510009E07Rik	RIKEN cDNA 2510009E07 gene
1452754_at	0.00096087	1.25e-06	6.6298	5.49261	0.35606	Creld2	cysteine-rich with EGF-like domains 2
1432156_a_at	0.00096087	1.26e-06	6.62696	5.48678	0.310631	Rnf32	ring finger protein 32
1438710_at	0.00098057	1.32e-06	6.6054	5.44249	0.314182	Htr1a	5-hydroxytryptamine (serotonin) receptor 1A
1417168_a_at	0.00098057	1.33e-06	-6.60295	5.43745	-0.526827	Usp2	ubiquitin specific peptidase 2
1419184_a_at	0.00102538	1.41e-06	-6.5757	5.38137	-0.300496	Fhl2	four and a half LIM domains 2
1455634_at	0.00107953	1.51e-06	-6.54507	5.31821	-0.369979	Son	Son DNA binding protein
1435185_at	0.00107953	1.53e-06	-6.53856	5.30475	-0.40375	Lrrcc1	leucine rich repeat and coiled-coil domain containing 1
1433719_at	0.00115737	1.68e-06	-6.49797	5.22081	-0.31704	Slc9a9	solute carrier family 9 (sodium/hydrogen exchanger), member 9
1420367_at	0.00115737	1.72e-06	-6.48814	5.20044	-0.354927	Denr	density-regulated protein
1426081_a_at	0.00115737	1.72e-06	6.48716	5.19841	0.331271	Dio2	deiodinase, iodothyronine, type II
1417169_at	0.00122331	1.84e-06	-6.45597	5.13367	-0.373295	Usp2	ubiquitin specific peptidase 2
1452094_at	0.00123455	1.89e-06	6.44543	5.11177	0.316648	P4ha1	procollagen-proline, 2-oxoglutarate 4-dioxygenase (proline 4-hydroxylase), alpha 1 polypeptide
1449184_at	0.00129432	2.01e-06	6.4181	5.05489	0.492263	Pglyrp1	peptidoglycan recognition protein 1
1435865_at	0.00130368	2.11e-06	6.39669	5.01027	0.321264	Hist3h2a///Trim17	histone cluster 3, H2a///tripartite motif-containing 17
1436733_at	0.00130368	2.11e-06	-6.39559	5.00797	-0.30393	Plppr1	phospholipid phosphatase related 1
1429958_x_at	0.00130368	2.14e-06	-6.39057	4.9975	-0.285578	Haghl	hydroxyacylglutathione hydrolase-like
1426047_a_at	0.00130368	2.14e-06	-6.39031	4.99697	-0.249831	Ptprr	protein tyrosine phosphatase, receptor type, R
1449121_at	0.00135207	2.25e-06	6.36827	4.95094	0.379641	Srsf10	serine/arginine-rich splicing factor 10
1439029_at	0.00164088	2.77e-06	6.27713	4.75987	0.365937	Gpt2	glutamic pyruvate transaminase (alanine aminotransferase) 2
1434637_x_at	0.00168514	2.91e-06	-6.25508	4.71347	-0.340687	Sin3b	transcriptional regulator, SIN3B (yeast)
1426519_at	0.00168514	2.91e-06	6.25403	4.71126	0.408877	P4ha1	procollagen-proline, 2-oxoglutarate 4-dioxygenase (proline 4-hydroxylase), alpha 1 polypeptide
1429741_at	0.00171568	3.01e-06	-6.24056	4.68287	-0.415626	Kcnv1	potassium channel, subfamily V, member 1
1439541_at	0.00172531	3.06e-06	-6.23259	4.66606	-0.312729	Particl	promoter of Mat2a antisense radiation induced circulating long non-coding RNA
1448979_at	0.00175209	3.15e-06	-6.22039	4.64033	-0.323386	Bloc1s5	biogenesis of lysosomal organelles complex-1, subunit 5, muted
1441598_at	0.00178502	3.25e-06	-6.20654	4.61107	-0.580962	Tmeff2	transmembrane protein with EGF-like and two follistatin-like domains 2
1421654_a_at	0.00178502	3.28e-06	-6.20155	4.60054	-0.363398	Lmna	lamin A
1427329_a_at	0.00183977	3.43e-06	-6.18229	4.55982	-0.401388	Ighm	immunoglobulin heavy constant mu
1444572_at	0.00183977	3.53e-06	6.1696	4.53296	0.403286	Mmd2	monocyte to macrophage differentiation-associated 2
1439854_at	0.00183977	3.54e-06	6.16838	4.53036	0.29227	Hrk	harakiri, BCL2 interacting protein (contains only BH3 domain)
1455150_at	0.00183977	3.55e-06	-6.16775	4.52902	-0.481185	Hecw2	HECT, C2 and WW domain containing E3 ubiquitin protein ligase 2
1424737_at	0.00185473	3.66e-06	6.1545	4.50095	0.359229	Thrsp	thyroid hormone responsive
1429244_at	0.00185473	3.66e-06	-6.15428	4.50048	-0.300564	2610524H06Rik	RIKEN cDNA 2610524H06 gene
1455182_at	0.00193756	3.91e-06	6.12551	4.43945	0.310999	Kif1b	kinesin family member 1B
1422660_at	0.00198124	4.04e-06	-6.11103	4.40868	-0.7686	Gm15453///Rbm3	predicted gene 15453///RNA binding motif protein 3
1453983_a_at	0.00202683	4.18e-06	6.09641	4.3776	0.378539	Mettl16	methyltransferase like 16
1455940_x_at	0.00211783	4.41e-06	-6.07264	4.32699	-0.405505	Wdr6	WD repeat domain 6
1431225_at	0.00214145	4.51e-06	6.06322	4.30691	0.396898	Sox11	SRY (sex determining region Y)-box 11
1454014_a_at	0.00214707	4.58e-06	6.05693	4.2935	0.439948	Mkks	McKusick-Kaufman syndrome
1455269_a_at	0.00214707	4.62e-06	-6.05302	4.28517	-0.291578	Coro1a	coronin, actin binding protein 1A
1454822_x_at	0.00227207	4.99e-06	-6.01975	4.21411	-0.397111	Apcdd1	adenomatosis polyposis coli down-regulated 1
1429232_at	0.00227207	4.99e-06	-6.0196	4.21379	-0.326804	Hnrnpr	heterogeneous nuclear ribonucleoprotein R
1419765_at	0.00232426	5.15e-06	-6.00539	4.18341	-0.407249	Cul2	cullin 2
1418687_at	0.00237835	5.35e-06	5.98924	4.14883	0.662602	Arc	activity regulated cytoskeletal-associated protein
1426040_a_at	0.00237835	5.38e-06	-5.98684	4.1437	-0.408485	Odf2	outer dense fiber of sperm tails 2
1452354_at	0.00241718	5.52e-06	-5.97561	4.11963	-0.319406	2810459M11Rik	RIKEN cDNA 2810459M11 gene
1460243_at	0.00244856	5.65e-06	-5.96584	4.09869	-0.243738	Sptlc2	serine palmitoyltransferase, long chain base subunit 2
1447566_at	0.00251954	5.9e-06	5.94663	4.05747	0.286003	Hdac4	histone deacetylase 4
1421088_at	0.00251954	5.92e-06	-5.94525	4.0545	-0.290085	Gpc4	glypican 4
1417575_at	0.0026055	6.18e-06	5.9267	4.01465	0.249787	Otub2	OTU domain, ubiquitin aldehyde binding 2
1435875_at	0.0026872	6.43e-06	5.90936	3.97735	0.389051	Prkab2	protein kinase, AMP-activated, beta 2 non-catalytic subunit
1438972_x_at	0.00274798	6.77e-06	-5.88748	3.93026	-0.340654	2810410L24Rik	RIKEN cDNA 2810410L24 gene
1456010_x_at	0.00274798	6.9e-06	-5.87923	3.91246	-0.451616	Hes5	hairy and enhancer of split 5 (Drosophila)
1427464_s_at	0.00274798	6.9e-06	5.87902	3.912	0.425312	Hspa5	heat shock protein 5
1439684_at	0.00274798	6.91e-06	-5.87857	3.91104	-0.407608	4930570G19Rik	RIKEN cDNA 4930570G19 gene
1426913_at	0.00274798	6.95e-06	-5.87641	3.90638	-0.448004	Lss	lanosterol synthase
1448743_at	0.00292715	7.46e-06	-5.84546	3.83959	-0.267414	Ssx2ip	synovial sarcoma, X breakpoint 2 interacting protein
1451566_at	0.0029328	7.55e-06	-5.84027	3.8284	-0.298857	Zfp810	zinc finger protein 810
1436908_at	0.0029328	7.61e-06	-5.83721	3.82178	-0.249154	Pcm1	pericentriolar material 1
1449388_at	0.00304653	7.97e-06	5.8172	3.77852	0.396143	Thbs4	thrombospondin 4
1454658_at	0.00305599	8.06e-06	-5.81224	3.7678	-0.267981	Ilvbl	ilvB (bacterial acetolactate synthase)-like
1438075_at	0.00307546	8.18e-06	-5.80592	3.75412	-0.317987	Fem1c	fem-1 homolog c (C.elegans)
1424182_at	0.00326038	8.82e-06	-5.77378	3.68447	-0.267228	Acat1	acetyl-Coenzyme A acetyltransferase 1
1421897_at	0.00330576	9.02e-06	5.76435	3.66403	0.314159	Elk1	ELK1, member of ETS oncogene family
1455720_at	0.00338225	9.3e-06	5.75108	3.63523	0.375299	Adamts2	a disintegrin-like and metallopeptidase (reprolysin type) with thrombospondin type 1 motif, 2
1436176_at	0.0034167	9.53e-06	5.74037	3.61197	0.373468	1500004A13Rik	RIKEN cDNA 1500004A13 gene
1454795_at	0.0034167	9.66e-06	-5.7347	3.59965	-0.424297	Cobll1	Cobl-like 1
1456748_a_at	0.0034167	9.7e-06	-5.73314	3.59625	-0.27158	Nipsnap1	nipsnap homolog 1 (C. elegans)
1435407_at	0.0034167	9.72e-06	-5.73197	3.59371	-0.233554	Zkscan16	zinc finger with KRAB and SCAN domains 16
1455937_at	0.0034167	9.77e-06	-5.72982	3.58904	-0.434866	Lrrtm4	leucine rich repeat transmembrane neuronal 4
1418472_at	0.00350275	1.02e-05	-5.70964	3.54516	-0.322467	Aspa	aspartoacylase
1445503_at	0.00350275	1.03e-05	-5.70935	3.54452	-0.296421	Gm715	predicted gene 715
1428527_at	0.00362338	1.07e-05	-5.69041	3.50327	-0.315025	Snx7	sorting nexin 7
1417395_at	0.00362338	1.08e-05	5.68846	3.49903	0.325763	Klf4	Kruppel-like factor 4 (gut)
1459274_at	0.00366882	1.1e-05	-5.67996	3.48051	-0.286048	Gpr135	G protein-coupled receptor 135
1441964_at	0.00368615	1.12e-05	-5.67176	3.46263	-0.335878	Qk	quaking
1435246_at	0.00368615	1.13e-05	5.66925	3.45715	0.307132	Paqr8	progestin and adipoQ receptor family member VIII
1437924_at	0.00368615	1.13e-05	-5.66857	3.45567	-0.386679	Son	Son DNA binding protein
1422943_a_at	0.0037008	1.14e-05	5.66379	3.44526	0.499112	Hspb1	heat shock protein 1
1434347_s_at	0.00370651	1.16e-05	-5.65823	3.43312	-0.312303	Rufy2	RUN and FYVE domain-containing 2
1435854_at	0.00370651	1.17e-05	-5.65319	3.42212	-0.410954	Opalin	oligodendrocytic myelin paranodal and inner loop protein
1437528_x_at	0.00370651	1.17e-05	-5.65228	3.42015	-0.290332	A730017C20Rik	RIKEN cDNA A730017C20 gene
1431811_a_at	0.00370651	1.18e-05	-5.65103	3.41742	-0.269231	Fbxo34	F-box protein 34
1436724_a_at	0.00375342	1.2e-05	-5.6427	3.39922	-0.272875	Eif2d	eukaryotic translation initiation factor 2D
1423130_a_at	0.00375622	1.21e-05	-5.63943	3.39209	-0.309706	Srsf5	serine/arginine-rich splicing factor 5
1435561_at	0.00381376	1.25e-05	-5.62597	3.36268	-0.263812	Erf	Ets2 repressor factor
1415904_at	0.00381376	1.26e-05	-5.62288	3.35591	-0.250649	Lpl	lipoprotein lipase
1418507_s_at	0.00381376	1.26e-05	-5.62136	3.3526	-0.299949	Socs2	suppressor of cytokine signaling 2
1424235_at	0.00383313	1.27e-05	5.61636	3.34165	0.28963	Gm5553///Ormdl2	predicted gene 5553///ORM1-like 2 (S. cerevisiae)
1444874_at	0.0038867	1.3e-05	5.60762	3.32254	0.424462	Atp5g1	ATP synthase, H+ transporting, mitochondrial F0 complex, subunit C1 (subunit 9)
1426712_at	0.00392922	1.33e-05	-5.5996	3.305	-0.301236	Slc6a15	solute carrier family 6 (neurotransmitter transporter), member 15
1423146_at	0.00392922	1.33e-05	-5.59739	3.30016	-0.403677	Hes5	hairy and enhancer of split 5 (Drosophila)
1426799_at	0.00408276	1.39e-05	5.57832	3.25839	0.267757	Rab8b	RAB8B, member RAS oncogene family
1418932_at	0.00408915	1.41e-05	5.5749	3.25091	0.352439	Nfil3	nuclear factor, interleukin 3, regulated
1455263_at	0.00438406	1.52e-05	-5.54259	3.18004	-0.247176	Lacc1	laccase (multicopper oxidoreductase) domain containing 1
1437181_at	0.00452179	1.57e-05	-5.52675	3.14527	-0.315712	Peli2	pellino 2
1424481_s_at	0.00455045	1.59e-05	-5.52138	3.13346	-0.45133	Armcx5	armadillo repeat containing, X-linked 5
1440225_at	0.00456175	1.61e-05	-5.51765	3.12527	-0.423416	Adgrf5	adhesion G protein-coupled receptor F5
1424418_at	0.00460471	1.65e-05	5.50641	3.10058	0.246419	Slc25a38	solute carrier family 25, member 38
1423648_at	0.00460471	1.65e-05	5.50575	3.09912	0.334094	Pdia6	protein disulfide isomerase associated 6
1423100_at	0.0046277	1.68e-05	5.49804	3.08216	0.738879	Fos	FBJ osteosarcoma oncogene
1439460_a_at	0.0046277	1.69e-05	-5.49756	3.08111	-0.246225	Arfgap2	ADP-ribosylation factor GTPase activating protein 2
1454693_at	0.0046277	1.69e-05	5.49586	3.07737	0.329633	Hdac4	histone deacetylase 4
1416354_at	0.00462923	1.7e-05	-5.49316	3.07143	-0.290226	Rbmx	RNA binding motif protein, X chromosome
1451978_at	0.00472382	1.76e-05	5.47925	3.0408	0.310601	Loxl1	lysyl oxidase-like 1
1453332_at	0.00472382	1.77e-05	-5.47589	3.0334	-0.457962	Trappc13	trafficking protein particle complex 13
1417900_a_at	0.00472382	1.78e-05	-5.47376	3.02872	-0.289068	Vldlr	very low density lipoprotein receptor
1456038_at	0.00472382	1.79e-05	-5.47203	3.02492	-0.24106	Fbxl4	F-box and leucine-rich repeat protein 4
1454782_at	0.00473099	1.81e-05	-5.46704	3.01392	-0.310217	Adgrb3	adhesion G protein-coupled receptor B3
1436021_at	0.00473099	1.83e-05	-5.46403	3.00729	-0.575435	Mfsd4a	major facilitator superfamily domain containing 4A
1425076_at	0.00473406	1.84e-05	-5.46133	3.00134	-0.302185	Dnajc18	DnaJ heat shock protein family (Hsp40) member C18
1456150_at	0.00484764	1.9e-05	5.44699	2.96974	0.282958	Kdm7a	lysine (K)-specific demethylase 7A
1453428_at	0.00484764	1.9e-05	-5.44649	2.96864	-0.279746	Shisa9	shisa family member 9
1425007_at	0.00493158	1.95e-05	-5.43685	2.94738	-0.261662	Zfp566	zinc finger protein 566
1428224_at	0.00510411	2.03e-05	-5.41995	2.91009	-0.637458	Hnrnpdl	heterogeneous nuclear ribonucleoprotein D-like
1438427_at	0.00531044	2.12e-05	-5.40087	2.86793	-0.418971	Fam120b	family with sequence similarity 120, member B
1435186_s_at	0.00538475	2.16e-05	-5.39266	2.8498	-0.266056	Lrrcc1	leucine rich repeat and coiled-coil domain containing 1
1448890_at	0.00542542	2.19e-05	5.38716	2.83764	0.503439	Klf2	Kruppel-like factor 2 (lung)
1443824_s_at	0.00546047	2.22e-05	-5.38213	2.82653	-0.322857	Car7	carbonic anhydrase 7
1426721_s_at	0.00550192	2.24e-05	5.37665	2.81439	0.278306	Tiparp	TCDD-inducible poly(ADP-ribose) polymerase
1456111_at	0.00556472	2.29e-05	-5.36801	2.79529	-0.358906	Nxpe4	neurexophilin and PC-esterase domain family, member 4
1426441_at	0.00556472	2.29e-05	-5.3673	2.79371	-0.304294	Slc11a2	solute carrier family 11 (proton-coupled divalent metal ion transporters), member 2
1433707_at	0.00564883	2.34e-05	-5.35872	2.77472	-0.290719	Gabra4	gamma-aminobutyric acid (GABA) A receptor, subunit alpha 4
1439333_at	0.00576197	2.4e-05	-5.34811	2.75124	-0.306489	Kcnv1	potassium channel, subfamily V, member 1
1420886_a_at	0.00576669	2.43e-05	5.34343	2.74086	0.303749	Xbp1	X-box binding protein 1
1453273_at	0.00576669	2.43e-05	-5.34259	2.73901	-0.381319	Kcnv1	potassium channel, subfamily V, member 1
1453342_at	0.00576669	2.44e-05	-5.3411	2.7357	-0.205922	Cdc40	cell division cycle 40
1454920_at	0.00593861	2.54e-05	5.32377	2.6973	0.248645	Uhrf2	ubiquitin-like, containing PHD and RING finger domains 2
1422973_a_at	0.00593861	2.55e-05	5.32338	2.69644	0.300502	Thrsp	thyroid hormone responsive
1439884_at	0.00593861	2.55e-05	-5.32217	2.69374	-0.283711	Nudt16	nudix (nucleoside diphosphate linked moiety X)-type motif 16
1455712_at	0.00618395	2.69e-05	5.30082	2.64639	0.270508	Hist3h2a	histone cluster 3, H2a
1420772_a_at	0.00619697	2.71e-05	5.29779	2.63968	0.507059	Tsc22d3	TSC22 domain family, member 3
1452257_at	0.00635793	2.8e-05	-5.28422	2.60955	-0.233157	Bdh1	3-hydroxybutyrate dehydrogenase, type 1
1453002_at	0.00635793	2.81e-05	5.28276	2.60631	0.275307	Sox11	SRY (sex determining region Y)-box 11
1436468_at	0.00639877	2.86e-05	-5.27394	2.58671	-0.332541	Zdhhc8	zinc finger, DHHC domain containing 8
1455007_s_at	0.00639877	2.87e-05	5.27372	2.58622	0.330271	Gpt2	glutamic pyruvate transaminase (alanine aminotransferase) 2
1430168_at	0.00639877	2.87e-05	-5.27341	2.58554	-0.346524	Cstad	CSA-conditional, T cell activation-dependent protein
1452736_at	0.00639877	2.89e-05	-5.27038	2.57881	-0.213546	R3hcc1	R3H domain and coiled-coil containing 1
1436662_at	0.00639877	2.89e-05	-5.26965	2.57717	-0.500674	Sorcs1	sortilin-related VPS10 domain containing receptor 1
1441944_s_at	0.00662018	3.01e-05	-5.2533	2.54085	-0.232389	Gpr135	G protein-coupled receptor 135
1439843_at	0.00675259	3.08e-05	-5.24295	2.51781	-0.272099	Camk4	calcium/calmodulin-dependent protein kinase IV
1448829_at	0.00679711	3.12e-05	-5.23816	2.50716	-0.252341	Smc6	structural maintenance of chromosomes 6
1434730_at	0.00685188	3.16e-05	-5.23277	2.49516	-0.326578	Mir9-3hg	Mir9-3 host gene
1434766_at	0.00691796	3.21e-05	-5.22673	2.48172	-0.297111	Prkaa2	protein kinase, AMP-activated, alpha 2 catalytic subunit
1427975_at	0.00725532	3.39e-05	5.20276	2.42837	0.299625	Rasl10a	RAS-like, family 10, member A
1438026_at	0.0072659	3.43e-05	-5.1982	2.4182	-0.26344	Zfp560	zinc finger protein 560
1452918_at	0.0072659	3.43e-05	-5.1982	2.4182	-0.272986	Fam204a	family with sequence similarity 204, member A
1451970_at	0.00731004	3.47e-05	-5.1937	2.40816	-0.332047	Daglb	diacylglycerol lipase, beta
1417529_at	0.00734898	3.5e-05	-5.18952	2.39885	-0.208703	Rab33a	RAB33A, member RAS oncogene family
1435119_at	0.00743372	3.56e-05	5.18277	2.38381	0.84269	Gm19439	predicted gene, 19439
1438007_at	0.00778091	3.74e-05	-5.16172	2.33686	-0.290339	Fam19a2	family with sequence similarity 19, member A2
1428372_at	0.00784695	3.79e-05	5.15626	2.32467	0.289029	St5	suppression of tumorigenicity 5
1435392_at	0.00806773	3.92e-05	-5.14273	2.29447	-0.284713	Wdr17	WD repeat domain 17
1439697_at	0.00815602	4e-05	-5.13358	2.27405	-0.438466	Il1rap	interleukin 1 receptor accessory protein
1452277_at	0.00815602	4.01e-05	-5.13302	2.27279	-0.262212	Arsg	arylsulfatase G
1416591_at	0.00815602	4.01e-05	-5.13248	2.27159	-0.271671	Rab34	RAB34, member RAS oncogene family
1429108_at	0.00821677	4.06e-05	-5.1275	2.26046	-0.383018	Msl2	male-specific lethal 2 homolog (Drosophila)
1428710_at	0.00841858	4.2e-05	5.11378	2.22979	0.264774	Rit1	Ras-like without CAAX 1
1445415_at	0.00841858	4.2e-05	-5.11362	2.22945	-0.35476	B230303A05Rik	RIKEN cDNA B230303A05 gene
1436745_at	0.00853087	4.27e-05	-5.10623	2.21293	-0.351301	Gorab	golgin, RAB6-interacting
1455187_at	0.00857451	4.32e-05	5.10225	2.20403	0.305431	Zbtb40	zinc finger and BTB domain containing 40
1428440_at	0.0086591	4.38e-05	-5.0963	2.19071	-0.200424	Slc25a12	solute carrier family 25 (mitochondrial carrier, Aralar), member 12
1428308_at	0.0086591	4.41e-05	5.09294	2.18321	0.255454	Pdrg1	p53 and DNA damage regulated 1
1450387_s_at	0.0086591	4.42e-05	5.09267	2.18259	0.224068	Ak4	adenylate kinase 4
1426609_at	0.00866808	4.44e-05	-5.09042	2.17757	-0.316548	Dis3	DIS3 homolog, exosome endoribonuclease and 3'-5' exoribonuclease
1436222_at	0.00897329	4.62e-05	-5.07416	2.1412	-0.371859	Gas5	growth arrest specific 5
1436440_at	0.00913824	4.72e-05	-5.06476	2.12015	-0.250926	Slc25a12	solute carrier family 25 (mitochondrial carrier, Aralar), member 12
1433577_at	0.00915446	4.76e-05	-5.06164	2.11316	-0.214644	A730017C20Rik	RIKEN cDNA A730017C20 gene
1436531_at	0.00915446	4.77e-05	-5.06046	2.11051	-0.303549	Metap2	methionine aminopeptidase 2
1434949_at	0.00915979	4.79e-05	-5.05844	2.106	-0.322006	Armc8	armadillo repeat containing 8
1418137_at	0.00916282	4.82e-05	-5.056	2.10052	-0.190564	Mrpl57	mitochondrial ribosomal protein L57
1424659_at	0.00916282	4.84e-05	-5.05477	2.09777	-0.266992	Slit2	slit homolog 2 (Drosophila)
1442063_at	0.00916282	4.86e-05	-5.05303	2.09388	-0.311818	Adamtsl1	ADAMTS-like 1
1435221_at	0.00917519	4.89e-05	-5.05037	2.08792	-0.219954	Foxp1	forkhead box P1
1436970_a_at	0.00917519	4.9e-05	-5.04899	2.08483	-0.371351	Pdgfrb	platelet derived growth factor receptor, beta polypeptide
1454838_s_at	0.00940854	5.05e-05	-5.03679	2.05749	-0.374446	Pkdcc	protein kinase domain containing, cytoplasmic
1429884_at	0.00957134	5.16e-05	-5.02791	2.0376	-0.237666	Srgap2	SLIT-ROBO Rho GTPase activating protein 2
1428495_at	0.00957168	5.18e-05	-5.02619	2.03373	-0.211068	Malsu1	mitochondrial assembly of ribosomal large subunit 1
1425281_a_at	0.00965934	5.27e-05	5.0192	2.01807	0.479085	Tsc22d3	TSC22 domain family, member 3
1451509_at	0.00965934	5.27e-05	5.01898	2.01758	0.229553	Ak6///Taf9	adenylate kinase 6///TATA-box binding protein associated factor 9
1425126_at	0.0101015	5.55e-05	4.99747	1.96932	0.218377	Ncam1	neural cell adhesion molecule 1
1455374_at	0.0101015	5.55e-05	-4.99695	1.96817	-0.317768	Kcnj3	potassium inwardly-rectifying channel, subfamily J, member 3
1428112_at	0.0101401	5.6e-05	4.99369	1.96084	0.387243	Manf	mesencephalic astrocyte-derived neurotrophic factor
1434572_at	0.010164	5.63e-05	-4.99104	1.9549	-0.362319	Hdac9	histone deacetylase 9
1439443_x_at	0.0102529	5.71e-05	-4.98575	1.94303	-0.212149	Tkt	transketolase
1424671_at	0.0102772	5.74e-05	4.98311	1.9371	0.382812	Plekhf1	pleckstrin homology domain containing, family F (with FYVE domain) member 1
1455352_at	0.0102814	5.77e-05	-4.98129	1.93301	-0.20909	U2surp	U2 snRNP-associated SURP domain containing
1418382_at	0.0102991	5.8e-05	-4.97893	1.92772	-0.30097	Apcdd1	adenomatosis polyposis coli down-regulated 1
1457536_at	0.0103045	5.85e-05	-4.97517	1.91928	-0.260952	Gpc5	glypican 5
1424175_at	0.0103045	5.86e-05	4.97435	1.91745	0.216861	Tef	thyrotroph embryonic factor
1436045_at	0.0103045	5.87e-05	4.97382	1.91625	0.312286	Tsga10	testis specific 10
1424419_at	0.0104646	6e-05	-4.9647	1.89577	-0.254917	Lrrc14	leucine rich repeat containing 14
1444218_at	0.0104646	6.01e-05	-4.96417	1.89459	-0.408369	Fam204a	family with sequence similarity 204, member A
1424381_at	0.0108002	6.23e-05	-4.94943	1.86148	-0.283592	Sugp1	SURP and G patch domain containing 1
1420405_at	0.0108641	6.31e-05	-4.94418	1.84967	-0.318554	Slco1a4	solute carrier organic anion transporter family, member 1a4
1425292_at	0.0108641	6.34e-05	-4.94209	1.84498	-0.246149	Dtna	dystrobrevin alpha
1421935_at	0.0108641	6.35e-05	-4.94116	1.84289	-0.328119	Rps20	ribosomal protein S20
1449423_at	0.0108641	6.36e-05	-4.94063	1.84169	-0.295811	Mast1	microtubule associated serine/threonine kinase 1
1421017_at	0.01095	6.43e-05	-4.93578	1.83079	-0.359539	Nrg3	neuregulin 3
1434562_at	0.0109754	6.47e-05	4.93325	1.8251	0.209508	Mfap3	microfibrillar-associated protein 3
1419361_at	0.0110768	6.56e-05	4.92786	1.813	0.226172	Ss18	synovial sarcoma translocation, Chromosome 18
1424119_at	0.0111897	6.65e-05	-4.92209	1.80002	-0.223063	Prkab1	protein kinase, AMP-activated, beta 1 non-catalytic subunit
1416344_at	0.0112216	6.69e-05	-4.91936	1.79388	-0.237093	Lamp2	lysosomal-associated membrane protein 2
1425022_at	0.0112603	6.74e-05	-4.91639	1.78719	-0.194953	Usp3	ubiquitin specific peptidase 3
1427167_at	0.0113792	6.84e-05	-4.91048	1.77391	-0.26942	Armcx4	armadillo repeat containing, X-linked 4
1434346_at	0.0114744	6.92e-05	-4.90549	1.76267	-0.279474	Rufy2	RUN and FYVE domain-containing 2
1453059_at	0.0118395	7.18e-05	-4.89023	1.72834	-0.264376	Mlip	muscular LMNA-interacting protein
1439542_at	0.0118395	7.19e-05	4.88942	1.72653	0.222078	Zfp651	zinc finger protein 651
1429546_at	0.0119017	7.26e-05	-4.88573	1.71823	-0.259995	4930423K06Rik	RIKEN cDNA 4930423K06 gene
1455378_at	0.0119436	7.31e-05	-4.88277	1.71155	-0.221604	Rimkla	ribosomal modification protein rimK-like family member A
1415935_at	0.0119671	7.35e-05	4.88045	1.70633	0.333885	Smoc2	SPARC related modular calcium binding 2
1436221_at	0.0120941	7.45e-05	-4.87456	1.69309	-0.200761	Ildr2	immunoglobulin-like domain containing receptor 2
1424074_at	0.0121242	7.5e-05	-4.87204	1.68741	-0.231014	Btf3l4	basic transcription factor 3-like 4
1459897_a_at	0.0123416	7.66e-05	-4.86318	1.66744	-0.267742	Sbsn	suprabasin
1449070_x_at	0.0123938	7.72e-05	-4.85994	1.66016	-0.364203	Apcdd1	adenomatosis polyposis coli down-regulated 1
1453122_at	0.0124237	7.77e-05	-4.85747	1.65459	-0.256524	Fam135a	family with sequence similarity 135, member A
1442062_at	0.0125565	7.88e-05	-4.85158	1.64133	-0.215023	Smad2	SMAD family member 2
1429041_at	0.0126052	7.96e-05	-4.84737	1.63185	-0.38232	2610005L07Rik	cadherin 11 pseudogene
1437149_at	0.0126052	7.97e-05	-4.84693	1.63086	-0.290738	Slc6a6	solute carrier family 6 (neurotransmitter transporter, taurine), member 6
1434820_s_at	0.0126052	8e-05	-4.84547	1.62757	-0.232382	Pkig	protein kinase inhibitor, gamma
1427151_at	0.0126052	8.04e-05	-4.84342	1.62294	-0.337602	Qser1	glutamine and serine rich 1
1423480_at	0.0126052	8.05e-05	-4.84271	1.62134	-0.247175	Nol11	nucleolar protein 11
1455723_at	0.0126842	8.13e-05	4.83867	1.61225	0.287298	D1Ertd448e///Imp4	DNA segment, Chr 1, ERATO Doi 448, expressed///IMP4, U3 small nucleolar ribonucleoprotein
1460345_at	0.0127518	8.2e-05	-4.83504	1.60405	-0.213042	Aida	axin interactor, dorsalization associated
1450841_at	0.0129082	8.37e-05	-4.82642	1.58463	-0.262589	Stt3a	STT3, subunit of the oligosaccharyltransferase complex, homolog A (S. cerevisiae)
1427588_a_at	0.0129082	8.39e-05	4.82545	1.58244	0.235006	Dtna	dystrobrevin alpha
1434094_at	0.0129082	8.44e-05	-4.82297	1.57684	-0.264724	Tmem125	transmembrane protein 125
1416505_at	0.0129082	8.46e-05	4.82225	1.57524	0.349968	Nr4a1	nuclear receptor subfamily 4, group A, member 1
1422231_a_at	0.0129082	8.48e-05	4.82104	1.5725	0.292471	Tnfrsf25	tumor necrosis factor receptor superfamily, member 25
1428923_at	0.0129082	8.53e-05	4.81852	1.56683	0.402445	Ppp1r3g	protein phosphatase 1, regulatory (inhibitor) subunit 3G
1416118_at	0.0129082	8.56e-05	-4.81737	1.56422	-0.403957	Trim59	tripartite motif-containing 59
1425059_at	0.0129082	8.56e-05	-4.81723	1.56393	-0.263195	Prmt6	protein arginine N-methyltransferase 6
1429503_at	0.0129082	8.56e-05	-4.817	1.56339	-0.24923	Fam69a	family with sequence similarity 69, member A
1434199_at	0.0129082	8.6e-05	4.81534	1.55966	0.225534	Tmem151b	transmembrane protein 151B
1431182_at	0.0129082	8.63e-05	4.81391	1.55642	0.41717	Hspa8	heat shock protein 8
1431056_a_at	0.0129082	8.64e-05	-4.81316	1.55473	-0.346228	Lpl	lipoprotein lipase
1440220_at	0.0130628	8.78e-05	4.80685	1.54051	0.256151	Ocln	occludin
1441842_s_at	0.0130914	8.82e-05	-4.80457	1.53538	-0.353935	Zfp707	zinc finger protein 707
1439387_x_at	0.0131027	8.89e-05	-4.80157	1.5286	-0.285303	Ctu2	cytosolic thiouridylase subunit 2
1418306_at	0.0131027	8.89e-05	4.8015	1.52844	0.277188	Crybb1	crystallin, beta B1
1449037_at	0.0131309	8.94e-05	4.79925	1.52338	0.305259	Crem	cAMP responsive element modulator
1428562_at	0.0131591	8.99e-05	-4.7967	1.51761	-0.299209	Mir22hg	Mir22 host gene (non-protein coding)
1448276_at	0.0131591	9.03e-05	-4.79502	1.51383	-0.291549	Tspan4	tetraspanin 4
1417146_at	0.0131591	9.04e-05	-4.79433	1.51227	-0.281832	Mri1	methylthioribose-1-phosphate isomerase 1
1436736_x_at	0.0132484	9.14e-05	-4.79019	1.50294	-0.339894	Nrep	neuronal regeneration related protein
1437030_at	0.0135347	9.36e-05	4.78	1.47994	0.248729	Plcd4	phospholipase C, delta 4
1440843_at	0.0137296	9.53e-05	-4.77274	1.46357	-0.24691	A230051N06Rik	RIKEN cDNA A230051N06 gene
1416590_a_at	0.0139056	9.68e-05	-4.76615	1.44868	-0.256547	Rab34	RAB34, member RAS oncogene family
1436633_at	0.0139641	9.75e-05	-4.76309	1.44178	-0.27526	Gm11772	predicted gene 11772
1444008_at	0.0141756	9.96e-05	-4.75418	1.42168	-0.236664	Gm2137	predicted gene 2137
1434434_s_at	0.0141756	9.98e-05	-4.75348	1.42009	-0.31667	Tcerg1	transcription elongation regulator 1 (CA150)
1422880_at	0.0141756	0.0001	-4.75076	1.41396	-0.211987	Sypl	synaptophysin-like protein
1427941_at	0.0141756	0.000101	-4.75052	1.4134	-0.217653	Dicer1	dicer 1, ribonuclease type III
1457861_at	0.0141756	0.000101	4.75033	1.41299	0.232239	A230009B12Rik	RIKEN cDNA A230009B12 gene
1458438_at	0.0143909	0.000102	-4.7428	1.39597	-0.253935	Ccdc122	coiled-coil domain containing 122
1426277_at	0.0146178	0.000104	-4.73503	1.37844	-0.253243	Tmem203	transmembrane protein 203
1418700_at	0.0148853	0.000107	-4.72624	1.35857	-0.225168	Lias	lipoic acid synthetase
1448397_at	0.0149011	0.000107	4.72452	1.35469	0.364348	Gjb6	gap junction protein, beta 6
1451283_at	0.0150343	0.000108	4.71956	1.34348	0.234704	Fam114a2	family with sequence similarity 114, member A2
1458643_at	0.0150993	0.000109	4.71623	1.33597	0.351562	Dtx1	deltex 1, E3 ubiquitin ligase
1448403_at	0.0150993	0.000109	-4.71523	1.33371	-0.202507	Lars	leucyl-tRNA synthetase
1456181_at	0.0151524	0.00011	-4.71251	1.32757	-0.191816	Wdr91	WD repeat domain 91
1427129_a_at	0.0151826	0.000111	-4.71043	1.32286	-0.230519	Hnrnpr	heterogeneous nuclear ribonucleoprotein R
1425141_at	0.0151926	0.000111	-4.7089	1.3194	-0.215904	Lactb2	lactamase, beta 2
1417263_at	0.0152157	0.000112	-4.70702	1.31515	-0.276292	Ptgs2	prostaglandin-endoperoxide synthase 2
1435034_at	0.0152488	0.000113	-4.70293	1.30591	-0.362734	Rpap2	RNA polymerase II associated protein 2
1419678_at	0.0152488	0.000113	4.70241	1.30474	0.226627	Lats2	large tumor suppressor 2
1426690_a_at	0.0152488	0.000113	-4.70142	1.30251	-0.280484	Srebf1	sterol regulatory element binding transcription factor 1
1425181_at	0.0152488	0.000113	-4.70115	1.30189	-0.261826	Sgip1	SH3-domain GRB2-like (endophilin) interacting protein 1
1434052_at	0.015313	0.000114	-4.69717	1.2929	-0.27975	AI593442	expressed sequence AI593442
1434166_at	0.015313	0.000114	-4.69695	1.29239	-0.286956	9330151L19Rik	RIKEN cDNA 9330151L19 gene
1418383_at	0.0155476	0.000117	-4.68868	1.27371	-0.381095	Apcdd1	adenomatosis polyposis coli down-regulated 1
1453573_at	0.0155476	0.000117	4.6882	1.27264	0.426823	Hist1h3d	histone cluster 1, H3d
1454969_at	0.015704	0.000119	-4.68234	1.25938	-0.236973	Lypd6	LY6/PLAUR domain containing 6
1425001_at	0.015704	0.000119	-4.68163	1.25777	-0.195346	Rnf146	ring finger protein 146
1438065_at	0.0157229	0.000119	-4.67992	1.25391	-0.378122	Rprd1a	regulation of nuclear pre-mRNA domain containing 1A
1428665_at	0.0157722	0.00012	-4.67742	1.24825	-0.218681	Pfn4	profilin family, member 4
1419285_s_at	0.0158194	0.000121	4.67498	1.24273	0.229099	Cyhr1	cysteine and histidine rich 1
1432509_at	0.0160602	0.000123	-4.66752	1.22589	-0.340593	5033430I15Rik	RIKEN cDNA 5033430I15 gene
1454056_at	0.0160969	0.000124	-4.66439	1.21879	-0.242678	9030407P20Rik	RIKEN cDNA 9030407P20 gene
1450417_a_at	0.0160969	0.000124	-4.663	1.21565	-0.320305	Rps20	ribosomal protein S20
1439279_at	0.0162947	0.000126	-4.65676	1.20155	-0.284236	Cldn34c1	claudin 34C1
1425066_a_at	0.0162988	0.000126	-4.65547	1.19863	-0.218931	Mtmr14	myotubularin related protein 14
1428922_at	0.0163548	0.000128	-4.6517	1.1901	-0.267971	Tril	TLR4 interactor with leucine-rich repeats
1438705_at	0.0167531	0.000131	4.63992	1.16345	0.273218	Cbfa2t3	core-binding factor, runt domain, alpha subunit 2, translocated to, 3 (human)
1419754_at	0.0167531	0.000131	-4.63941	1.16229	-0.328129	Myo5a	myosin VA
1419273_at	0.016754	0.000132	-4.63771	1.15845	-0.198449	Uri1	URI1, prefoldin-like chaperone
1435820_x_at	0.016754	0.000132	-4.63705	1.15697	-0.265998	Ddr1	discoidin domain receptor family, member 1
1417161_at	0.0167628	0.000133	4.63373	1.14946	0.219015	Cdk2ap2	CDK2-associated protein 2
1430030_at	0.0167628	0.000133	4.63365	1.14926	0.286417	Dubr	Dppa2 upstream binding RNA
1429466_s_at	0.0167628	0.000134	4.63066	1.14251	0.230085	Aph1b///Aph1c	aph1 homolog B, gamma secretase subunit///aph1 homolog C, gamma secretase subunit
1441815_at	0.0167628	0.000135	-4.62976	1.14047	-0.225298	Neto1	neuropilin (NRP) and tolloid (TLL)-like 1
1423883_at	0.0167628	0.000135	-4.62913	1.13905	-0.236481	Acsl1	acyl-CoA synthetase long-chain family member 1
1435977_at	0.0167628	0.000135	-4.62839	1.13737	-0.236051	Hdgfrp3	hepatoma-derived growth factor, related protein 3
1437386_at	0.0167628	0.000136	-4.62644	1.13296	-0.271326	Lingo1	leucine rich repeat and Ig domain containing 1
1418266_at	0.0167628	0.000136	4.62606	1.13211	0.389405	Alox12b	arachidonate 12-lipoxygenase, 12R type
1417915_at	0.0167628	0.000136	-4.62538	1.13057	-0.278373	Rap2b	RAP2B, member of RAS oncogene family
1450219_at	0.01707	0.000139	4.61643	1.1103	0.292262	Htr1a	5-hydroxytryptamine (serotonin) receptor 1A
1453374_at	0.01707	0.00014	-4.6145	1.10595	-0.271368	Zfand5	zinc finger, AN1-type domain 5
1453807_at	0.0171376	0.000141	-4.61175	1.09972	-0.378424	6330563C09Rik	RIKEN cDNA 6330563C09 gene
1435692_at	0.0171448	0.000141	4.61001	1.09579	0.204414	Kctd21	potassium channel tetramerisation domain containing 21
1429055_at	0.0171448	0.000141	-4.60935	1.09429	-0.288463	Shtn1	shootin 1
1453141_at	0.0173479	0.000143	-4.60337	1.08076	-0.193535	0610009L18Rik	RIKEN cDNA 0610009L18 gene
1451677_at	0.0175793	0.000146	4.59679	1.06586	0.242002	Narf	nuclear prelamin A recognition factor
1448744_at	0.0176888	0.000147	-4.59212	1.0553	-0.218432	Galns	galactosamine (N-acetyl)-6-sulfate sulfatase
1429050_at	0.0176888	0.000147	-4.59202	1.05507	-0.257605	Chic2	cysteine-rich hydrophobic domain 2
1442272_at	0.0177816	0.000149	-4.58876	1.04769	-0.262408	Galntl6	UDP-N-acetyl-alpha-D-galactosamine:polypeptide N-acetylgalactosaminyltransferase-like 6
1435719_at	0.0177961	0.000149	-4.5866	1.04281	-0.286554	AI448984	expressed sequence AI448984
1453081_at	0.0177961	0.00015	-4.58624	1.04198	-0.238821	2410022M11Rik	RIKEN cDNA 2410022M11 gene
1432538_a_at	0.0179126	0.000151	-4.58245	1.03341	-0.301221	Rfc3	replication factor C (activator 1) 3
1422616_s_at	0.0180878	0.000153	-4.57702	1.02111	-0.210496	Wdr54	WD repeat domain 54
1438982_s_at	0.0180878	0.000153	-4.57626	1.0194	-0.375825	Flywch2	FLYWCH family member 2
1437475_at	0.0182845	0.000155	-4.57071	1.00684	-0.30917	BC028454	cDNA sequence BC028454
1425079_at	0.0184008	0.000157	4.56702	0.99847	0.321392	Tm6sf2	transmembrane 6 superfamily member 2
1448990_a_at	0.0184807	0.000158	-4.56415	0.99198	-0.243715	Myo1b	myosin IB
1436893_a_at	0.0187081	0.00016	-4.55803	0.97812	-0.250628	2021-03-07	membrane-associated ring finger (C3HC4) 7
1455153_at	0.0187656	0.000161	4.55569	0.97283	0.186271	Zfp236	zinc finger protein 236
1454671_at	0.0188759	0.000162	-4.55221	0.96494	-0.26896	Insig1	insulin induced gene 1
1423043_s_at	0.0188889	0.000163	-4.55068	0.96148	-0.21654	Ddx3x	DEAD/H (Asp-Glu-Ala-Asp/His) box polypeptide 3, X-linked
1419466_at	0.0188889	0.000163	4.5498	0.95948	0.222961	Nkd2	naked cuticle 2 homolog (Drosophila)
1416535_at	0.0189135	0.000164	-4.54821	0.95587	-0.199372	Mcrs1	microspherule protein 1
1435536_at	0.0190813	0.000166	4.54309	0.94429	0.216805	Ddi2	DNA-damage inducible protein 2
1422155_at	0.0190813	0.000167	4.54182	0.94142	0.381592	Hist2h3b///Hist1h3e///Hist1h3b///Hist1h3d///Hist1h3c///Hist1h3f///Hist2h3c2///Hist2h3c1	histone cluster 2, H3b///histone cluster 1, H3e///histone cluster 1, H3b///histone cluster 1, H3d///histone cluster 1, H3c///histone cluster 1, H3f///histone cluster 2, H3c2///histone cluster 2, H3c1
1424268_at	0.0190813	0.000167	4.5414	0.94046	0.205372	Smox	spermine oxidase
1429251_at	0.0193237	0.000169	-4.53514	0.92629	-0.31548	Prdm2	PR domain containing 2, with ZNF domain
1420609_at	0.019354	0.00017	-4.53327	0.92205	-0.241175	2021-03-07	membrane-associated ring finger (C3HC4) 7
1436060_at	0.019354	0.00017	-4.53241	0.9201	-0.198019	Gm15706	predicted gene 15706
1420356_at	0.0193967	0.000171	-4.53046	0.91568	-0.265294	Ninj2	ninjurin 2
1425352_at	0.0195336	0.000173	4.52652	0.90676	0.297617	Rcor3	REST corepressor 3
1416983_s_at	0.0202933	0.00018	-4.50956	0.86833	-0.260097	Foxo1	forkhead box O1
1417850_at	0.0202933	0.00018	-4.5087	0.8664	-0.235117	Rb1	retinoblastoma 1
1419369_at	0.0204721	0.000182	-4.50405	0.85587	-0.280288	Rnf138	ring finger protein 138
1422053_at	0.020493	0.000183	4.50261	0.85259	0.276517	Inhba	inhibin beta-A
1457690_at	0.0206191	0.000185	4.49905	0.84454	0.291724	Kalrn	kalirin, RhoGEF kinase
1451211_a_at	0.0206825	0.000186	-4.49677	0.83936	-0.192165	Eif2d	eukaryotic translation initiation factor 2D
1434869_at	0.0207339	0.000187	-4.49472	0.83473	-0.247847	Tdrd3	tudor domain containing 3
1444630_at	0.0209493	0.000189	4.48944	0.82276	0.250403	D2Ertd127e	DNA segment, Chr 2, ERATO Doi 127, expressed
1448497_at	0.0210917	0.000191	-4.48563	0.81413	-0.203694	Ercc3	excision repair cross-complementing rodent repair deficiency, complementation group 3
1435328_at	0.0211588	0.000192	4.48317	0.80854	0.218636	Cyhr1	cysteine and histidine rich 1
1427245_at	0.0211588	0.000192	-4.48208	0.80609	-0.208543	Arfgap1	ADP-ribosylation factor GTPase activating protein 1
1455085_at	0.0211588	0.000193	-4.4813	0.80431	-0.304255	1700086L19Rik	RIKEN cDNA 1700086L19 gene
1418408_at	0.0211828	0.000194	-4.47923	0.79963	-0.270634	Zfand1	zinc finger, AN1-type domain 1
1460725_at	0.0211828	0.000194	-4.47865	0.79831	-0.252283	Xpa	xeroderma pigmentosum, complementation group A
1426108_s_at	0.0211828	0.000194	-4.47783	0.79645	-0.288375	Cacnb1	calcium channel, voltage-dependent, beta 1 subunit
1455820_x_at	0.021517	0.000198	-4.46971	0.77805	-0.313666	Scarb1	scavenger receptor class B, member 1
1453309_at	0.021517	0.000199	-4.46923	0.77696	-0.338061	9330179D12Rik	RIKEN cDNA 9330179D12 gene
1456096_at	0.021517	0.000199	-4.46832	0.7749	-0.332754	6430573F11Rik	RIKEN cDNA 6430573F11 gene
1425964_x_at	0.021517	0.0002	4.46693	0.77175	0.401657	Hspb1	heat shock protein 1
1423284_at	0.021517	0.0002	-4.46642	0.77059	-0.458393	Mansc1	MANSC domain containing 1
1449040_a_at	0.0216195	0.000201	-4.46347	0.76391	-0.26365	Sephs2	selenophosphate synthetase 2
1443982_at	0.0219395	0.000205	-4.45643	0.74795	-0.2068	Arhgef28	Rho guanine nucleotide exchange factor (GEF) 28
1434737_at	0.0219409	0.000205	-4.45542	0.74567	-0.258099	Obfc1	oligonucleotide/oligosaccharide-binding fold containing 1
1424568_at	0.0219554	0.000206	-4.4539	0.74222	-0.241134	Tspan2	tetraspanin 2
1441682_s_at	0.0219554	0.000206	-4.4532	0.74063	-0.193427	Xpot	exportin, tRNA (nuclear export receptor for tRNAs)
1451286_s_at	0.0220774	0.000208	-4.44994	0.73325	-0.246545	Fus	fused in sarcoma
1460574_at	0.0220787	0.000209	-4.44894	0.731	-0.30468	Fat4	FAT atypical cadherin 4
1451475_at	0.0220994	0.000209	-4.44759	0.72793	-0.323645	Plxnd1	plexin D1
1429863_at	0.0221993	0.000211	4.44477	0.72152	0.222172	Lonrf3	LON peptidase N-terminal domain and ring finger 3
1417318_at	0.0226215	0.000217	-4.4328	0.69442	-0.248392	Brinp1	bone morphogenic protein/retinoic acid inducible neural specific 1
1429393_at	0.0226215	0.000217	4.43279	0.69439	0.215237	Dcaf12	DDB1 and CUL4 associated factor 12
1436871_at	0.0226215	0.000217	-4.43206	0.69273	-0.36329	Srsf7	serine/arginine-rich splicing factor 7
1458163_at	0.0226215	0.000218	-4.43125	0.69089	-0.294164	Zfp941	zinc finger protein 941
1451462_a_at	0.0227166	0.000219	-4.42857	0.68482	-0.20011	Ifnar2	interferon (alpha and beta) receptor 2
1428618_at	0.0227586	0.00022	4.42675	0.6807	0.233673	Hcfc2	host cell factor C2
1440932_at	0.0227586	0.000221	4.42591	0.6788	0.270872	Trim17	tripartite motif-containing 17
1436931_at	0.0227705	0.000222	-4.42382	0.67407	-0.352788	Rfx4	regulatory factor X, 4 (influences HLA class II expression)
1422082_a_at	0.0227705	0.000222	4.4231	0.67241	0.271556	Nfya	nuclear transcription factor-Y alpha
1430190_at	0.0227705	0.000223	-4.42185	0.6696	-0.280156	Ccdc30	coiled-coil domain containing 30
1447726_at	0.0227705	0.000223	-4.42179	0.66946	-0.400237	Ripply2	ripply transcriptional repressor 2
1418822_a_at	0.0227705	0.000223	-4.421	0.66768	-0.263599	Arf6	ADP-ribosylation factor 6
1447027_s_at	0.0227894	0.000224	-4.41973	0.66479	-0.207009	Lias	lipoic acid synthetase
1445605_s_at	0.0228492	0.000225	-4.41772	0.66023	-0.280801	Fam135a	family with sequence similarity 135, member A
1417975_at	0.0230061	0.000227	4.41388	0.65152	0.321022	Kpna4	karyopherin (importin) alpha 4
1421896_at	0.0230061	0.000228	4.41304	0.64963	0.293403	Elk1	ELK1, member of ETS oncogene family
1436088_at	0.0230617	0.000229	-4.41084	0.64463	-0.243066	Fam49b	family with sequence similarity 49, member B
1424772_at	0.0230617	0.000229	4.4102	0.64319	0.228478	H2afj	H2A histone family, member J
1453261_at	0.0231083	0.00023	4.40845	0.63922	0.271781	2610035D17Rik	RIKEN cDNA 2610035D17 gene
1417514_at	0.0231548	0.000231	-4.4067	0.63526	-0.218418	Ssx2ip	synovial sarcoma, X breakpoint 2 interacting protein
1448765_at	0.0233647	0.000234	-4.40206	0.62475	-0.262818	Fyn	Fyn proto-oncogene
1429243_at	0.0233754	0.000234	4.40096	0.62225	0.186803	Inip	INTS3 and NABP interacting protein
1441662_at	0.0236584	0.000238	-4.39509	0.60893	-0.259491	Cyp4x1	cytochrome P450, family 4, subfamily x, polypeptide 1
1423539_at	0.023837	0.00024	-4.39075	0.59911	-0.187051	Pms2	postmeiotic segregation increased 2 (S. cerevisiae)
1415723_at	0.023837	0.000241	-4.38957	0.59643	-0.178042	Eif5	eukaryotic translation initiation factor 5
1428889_at	0.023837	0.000241	-4.38866	0.59436	-0.307533	Alkbh3	alkB homolog 3, alpha-ketoglutarate-dependent dioxygenase
1455047_at	0.023837	0.000242	-4.38836	0.59368	-0.217861	Fbxo3	F-box protein 3
1435526_at	0.0241278	0.000245	-4.38245	0.5803	-0.257065	Tor1aip2	torsin A interacting protein 2
1450223_at	0.0242949	0.000247	4.37871	0.57181	0.268872	Apaf1	apoptotic peptidase activating factor 1
1447738_s_at	0.0244846	0.00025	-4.3746	0.56251	-0.213794	Ankrd13d	ankyrin repeat domain 13 family, member D
1428921_at	0.024574	0.000251	-4.37221	0.55707	-0.227308	Mplkip	M-phase specific PLK1 intereacting protein
1452540_a_at	0.0246087	0.000252	4.37073	0.55372	0.242202	Hist1h2br///Hist1h2bq///Hist1h2bp///Hist1h2bn///Hist1h2bm///Hist1h2bl///Hist1h2bj///Hist1h2bg///Hist1h2bf///Hist1h2be///Hist1h2bc	histone cluster 1 H2br///histone cluster 1, H2bq///histone cluster 1, H2bp///histone cluster 1, H2bn///histone cluster 1, H2bm///histone cluster 1, H2bl///histone cluster 1, H2bj///histone cluster 1, H2bg///histone cluster 1, H2bf///histone cluster 1, H2be///histone cluster 1, H2bc
1433806_x_at	0.0246316	0.000253	4.36945	0.55083	0.219139	Calr	calreticulin
1452617_at	0.0246574	0.000254	4.36813	0.54784	0.223006	Ssbp1	single-stranded DNA binding protein 1
1440864_at	0.0246892	0.000255	-4.36618	0.54342	-0.236979	AI836737	expressed sequence AI836737
1429410_at	0.0246892	0.000255	-4.36583	0.54261	-0.238779	Eny2	enhancer of yellow 2 homolog (Drosophila)
1448830_at	0.0250288	0.00026	4.35844	0.52587	0.269432	Dusp1	dual specificity phosphatase 1
1430152_at	0.0250288	0.00026	-4.35796	0.52478	-0.283977	Eps15	epidermal growth factor receptor pathway substrate 15
1452784_at	0.0250288	0.00026	-4.35755	0.52385	-0.188706	Itgav	integrin alpha V
1455657_at	0.0251308	0.000262	4.35499	0.51805	0.35797	Smg1	SMG1 homolog, phosphatidylinositol 3-kinase-related kinase (C. elegans)
1442676_at	0.0251835	0.000263	-4.35325	0.51411	-0.391663	Maoa	monoamine oxidase A
1434993_at	0.0253621	0.000265	-4.34946	0.50552	-0.385375	Brinp3	bone morphogenetic protein/retinoic acid inducible neural specific 3
1460391_at	0.0256876	0.00027	-4.34314	0.4912	-0.265566	Ola1	Obg-like ATPase 1
1429966_at	0.0256876	0.000271	-4.34141	0.48727	-0.24462	Abhd18	abhydrolase domain containing 18
1423633_at	0.0256876	0.000272	4.33956	0.48307	0.204972	Snrnp48	small nuclear ribonucleoprotein 48 (U11/U12)
1428551_at	0.0256876	0.000272	-4.33874	0.48122	-0.258519	Trmt11	tRNA methyltransferase 11
1416155_at	0.0256876	0.000273	-4.33852	0.48071	-0.219582	Hmgb3	high mobility group box 3
1427073_at	0.0256876	0.000273	4.33808	0.47972	0.204208	Lace1	lactation elevated 1
1436404_at	0.0256876	0.000273	-4.33727	0.47789	-0.288448	Tlcd1	TLC domain containing 1
1449291_a_at	0.025837	0.000276	-4.33402	0.47052	-0.198598	Dcbld1	discoidin, CUB and LCCL domain containing 1
1422255_at	0.0260166	0.000278	-4.33031	0.46211	-0.236664	Kcna4	potassium voltage-gated channel, shaker-related subfamily, member 4
1429402_at	0.026152	0.00028	4.32731	0.45532	0.228115	Glt8d2	glycosyltransferase 8 domain containing 2
1435866_s_at	0.0262709	0.000282	4.32399	0.44778	0.223402	Hist3h2a	histone cluster 3, H2a
1426312_at	0.0262709	0.000283	-4.32374	0.44722	-0.175785	Bre	brain and reproductive organ-expressed protein
1431068_at	0.0262989	0.000284	4.32129	0.44168	0.278355	Rmnd5a	required for meiotic nuclear division 5 homolog A
1421884_at	0.0262989	0.000284	-4.32094	0.44086	-0.372754	Sos1	son of sevenless homolog 1 (Drosophila)
1449420_at	0.0262989	0.000286	-4.31911	0.43674	-0.247022	Pde1b	phosphodiesterase 1B, Ca2+-calmodulin dependent
1452218_at	0.0262989	0.000286	4.31908	0.43666	0.284906	Ccdc117	coiled-coil domain containing 117
1416146_at	0.0262989	0.000286	-4.31907	0.43664	-0.293894	Hspa4	heat shock protein 4
1429156_at	0.0263306	0.000287	-4.31712	0.43223	-0.269838	Cenpw	centromere protein W
1422869_at	0.0263306	0.000287	4.31689	0.4317	0.27619	Mertk	c-mer proto-oncogene tyrosine kinase
1442963_at	0.0264203	0.000289	4.31465	0.42663	0.244898	Plcg1	phospholipase C, gamma 1
1418249_at	0.0265439	0.000291	4.31189	0.42037	0.196155	Crcp	calcitonin gene-related peptide-receptor component protein
1440962_at	0.0266934	0.000293	-4.30821	0.41202	-0.307708	Slc8a3	solute carrier family 8 (sodium/calcium exchanger), member 3
1422768_at	0.0266934	0.000294	-4.30791	0.41135	-0.24031	Syncrip	synaptotagmin binding, cytoplasmic RNA interacting protein
1422494_s_at	0.0267756	0.000295	4.30581	0.40659	0.22146	Cdk20	cyclin-dependent kinase 20
1450366_at	0.026807	0.000296	4.30422	0.40299	0.330162	Hrk	harakiri, BCL2 interacting protein (contains only BH3 domain)
1429058_at	0.026807	0.000297	4.30368	0.40174	0.229369	Tmem107	transmembrane protein 107
1426476_at	0.0268279	0.000297	-4.30253	0.39914	-0.25002	Rasa1	RAS p21 protein activator 1
1430579_at	0.026839	0.000298	-4.30153	0.39689	-0.326602	Tnik	TRAF2 and NCK interacting kinase
1442377_at	0.0270042	0.000301	4.29818	0.38929	0.252861	Gm20083	predicted gene, 20083
1435803_a_at	0.0270916	0.000302	-4.29603	0.38442	-0.222758	Eif4e2	eukaryotic translation initiation factor 4E member 2
1450774_at	0.0272125	0.000304	4.29337	0.3784	0.203609	Ly6g6d	lymphocyte antigen 6 complex, locus G6D
1450414_at	0.0273112	0.000306	-4.29106	0.37316	-0.211809	Pdgfb	platelet derived growth factor, B polypeptide
1435930_at	0.0274172	0.000308	-4.28865	0.36769	-0.199297	Scaper	S phase cyclin A-associated protein in the ER
1452101_at	0.027461	0.000309	-4.28718	0.36436	-0.195473	Blmh	bleomycin hydrolase
1420058_s_at	0.0275989	0.000311	-4.2843	0.35784	-0.168116	Mtfr1l	mitochondrial fission regulator 1-like
1418591_at	0.0276042	0.000312	4.28289	0.35464	0.163956	Dnaja4	DnaJ heat shock protein family (Hsp40) member A4
1418339_at	0.0276042	0.000312	-4.2826	0.35398	-0.200982	Recql	RecQ protein-like
1427319_at	0.0276144	0.000313	4.28164	0.35181	0.203945	A230046K03Rik	RIKEN cDNA A230046K03 gene
1418744_s_at	0.0276497	0.000314	4.28019	0.34852	0.196222	Tesc	tescalcin
1444029_at	0.0276497	0.000315	-4.27875	0.34525	-0.295403	Parp11	poly (ADP-ribose) polymerase family, member 11
1429778_at	0.0276497	0.000316	-4.2781	0.34379	-0.221101	Optn	optineurin
1426823_s_at	0.0276497	0.000316	-4.2779	0.34333	-0.220379	Psme4	proteasome (prosome, macropain) activator subunit 4
1425114_at	0.0276762	0.000317	-4.27618	0.33944	-0.282087	Rbbp6	retinoblastoma binding protein 6
1416605_at	0.0276762	0.000318	-4.27484	0.33639	-0.237267	Nhp2	NHP2 ribonucleoprotein
1428584_a_at	0.0276762	0.000318	-4.27469	0.33606	-0.191187	Haghl	hydroxyacylglutathione hydrolase-like
1451038_at	0.0276762	0.000319	4.27418	0.3349	0.237672	Apln	apelin
1424759_at	0.0276762	0.000319	-4.27352	0.33341	-0.346773	Arrdc4	arrestin domain containing 4
1420660_at	0.0278526	0.000322	-4.26937	0.32401	-0.233116	Lrrc6	leucine rich repeat containing 6 (testis)
1436378_at	0.0278526	0.000322	-4.26922	0.32366	-0.217614	Lrrfip2	leucine rich repeat (in FLII) interacting protein 2
1437436_s_at	0.0278526	0.000323	-4.26853	0.3221	-0.245002	Grk6	G protein-coupled receptor kinase 6
1422186_s_at	0.027898	0.000324	-4.26707	0.31879	-0.165846	Cyb5r3	cytochrome b5 reductase 3
1449338_at	0.027988	0.000326	4.26495	0.314	0.203977	Anapc16	anaphase promoting complex subunit 16
1437226_x_at	0.0280811	0.000328	-4.2628	0.30912	-0.260536	Marcksl1	MARCKS-like 1
1433443_a_at	0.0280997	0.000328	-4.26164	0.30648	-0.208032	Hmgcs1	3-hydroxy-3-methylglutaryl-Coenzyme A synthase 1
1424675_at	0.0280997	0.000329	-4.26096	0.30495	-0.213429	Slc39a6	solute carrier family 39 (metal ion transporter), member 6
1430675_at	0.028412	0.000333	-4.25562	0.29286	-0.2597	2900055J20Rik	RIKEN cDNA 2900055J20 gene
1424253_at	0.0286544	0.000337	4.25134	0.28316	0.246767	Fam114a2	family with sequence similarity 114, member A2
1421471_at	0.0287181	0.000338	-4.24965	0.27932	-0.182491	Npy1r	neuropeptide Y receptor Y1
1428894_at	0.0287425	0.000339	-4.24852	0.27677	-0.218207	Selo	selenoprotein O
1460576_at	0.0287507	0.00034	-4.24763	0.27475	-0.179773	Exoc6	exocyst complex component 6
1438613_at	0.0288096	0.000341	-4.24601	0.27109	-0.370588	Kcna4	potassium voltage-gated channel, shaker-related subfamily, member 4
1426477_at	0.0289865	0.000345	-4.24139	0.2606	-0.229481	Rasa1	RAS p21 protein activator 1
1449383_at	0.0289865	0.000346	-4.24048	0.25855	-0.213762	Adssl1	adenylosuccinate synthetase like 1
1451189_at	0.0289865	0.000346	-4.24041	0.25838	-0.228293	Zswim1	zinc finger SWIM-type containing 1
1435565_at	0.0289865	0.000346	-4.24021	0.25793	-0.220428	Vps29	VPS29 retromer complex component
1423589_at	0.0289865	0.000346	-4.23965	0.25666	-0.182732	Arpc4	actin related protein 2/3 complex, subunit 4
1434520_at	0.0290698	0.000349	4.23712	0.25094	0.216144	Sc5d	sterol-C5-desaturase
1425023_at	0.0290698	0.000349	-4.23629	0.24905	-0.18733	Usp3	ubiquitin specific peptidase 3
1415741_at	0.0290698	0.00035	-4.23525	0.2467	-0.161024	Tmem165	transmembrane protein 165
1418902_at	0.0290698	0.00035	-4.23515	0.24648	-0.220568	Chid1	chitinase domain containing 1
1429047_at	0.0290698	0.000351	-4.23466	0.24535	-0.203871	Rtf1	RTF1, Paf1/RNA polymerase II complex component
1427418_a_at	0.0292253	0.000353	-4.2317	0.23865	-0.226001	Hif1a	hypoxia inducible factor 1, alpha subunit
1422216_at	0.0292588	0.000354	-4.23047	0.23587	-0.210049	Mid2	midline 2
1434260_at	0.0293604	0.000356	-4.22829	0.23092	-0.224366	Fchsd2	FCH and double SH3 domains 2
1453308_at	0.0294184	0.000358	-4.22624	0.2263	-0.246557	8430429K09Rik	RIKEN cDNA 8430429K09 gene
1455412_at	0.0294184	0.000358	4.22597	0.22567	0.216802	Sfmbt1	Scm-like with four mbt domains 1
1416630_at	0.029492	0.00036	-4.22419	0.22164	-0.250466	Id3	inhibitor of DNA binding 3
1449304_at	0.0296764	0.000363	-4.22087	0.21412	-0.224869	Zbtb11os1	zinc finger and BTB domain containing 11, opposite strand 1
1416442_at	0.0298185	0.000365	4.21815	0.20796	0.210713	Ier2	immediate early response 2
1426824_at	0.0305364	0.000375	-4.20747	0.18377	-0.209292	Psme4	proteasome (prosome, macropain) activator subunit 4
1460275_at	0.0305364	0.000375	4.20685	0.18236	0.192145	Gpr3	G-protein coupled receptor 3
1431614_at	0.0310234	0.000382	-4.19916	0.16495	-0.321958	2810049E08Rik	RIKEN cDNA 2810049E08 gene
1429862_at	0.0310234	0.000382	-4.19884	0.16422	-0.243746	Pla2g4e	phospholipase A2, group IVE
1434314_s_at	0.0310284	0.000383	-4.19772	0.1617	-0.239905	Rab11fip5	RAB11 family interacting protein 5 (class I)
1439548_at	0.0310284	0.000384	-4.19729	0.16071	-0.274419	Rap2b	RAP2B, member of RAS oncogene family
1441127_at	0.0310521	0.000385	-4.19623	0.15833	-0.266262	Slitrk2	SLIT and NTRK-like family, member 2
1428485_at	0.0310861	0.000386	4.19505	0.15564	0.213576	Car12	carbonic anhydrase 12
1439707_at	0.0312091	0.000388	-4.19268	0.15029	-0.283642	C230034O21Rik	RIKEN cDNA C230034O21 gene
1422134_at	0.0312636	0.00039	4.19123	0.14699	0.291854	Fosb	FBJ osteosarcoma oncogene B
1424344_s_at	0.0313001	0.000392	-4.18918	0.14237	-0.185016	Eif1a	eukaryotic translation initiation factor 1A
1434712_at	0.0313001	0.000393	-4.1881	0.13991	-0.18539	Mief1	mitochondrial elongation factor 1
1426999_at	0.0313001	0.000393	-4.18771	0.13902	-0.209978	Zc3h14	zinc finger CCCH type containing 14
1430125_s_at	0.0313001	0.000393	4.1874	0.13833	0.173033	Pqlc1	PQ loop repeat containing 1
1459659_at	0.0313001	0.000394	-4.18645	0.13618	-0.269836	Gm31454	predicted gene, 31454
1427351_s_at	0.0313001	0.000395	-4.18602	0.13519	-0.309675	Ighm	immunoglobulin heavy constant mu
1422542_at	0.0313001	0.000395	-4.18564	0.13434	-0.289538	Gpr34	G protein-coupled receptor 34
1423162_s_at	0.0316744	0.0004	4.18001	0.1216	0.254253	Spred1	sprouty protein with EVH-1 domain 1, related sequence
1457587_at	0.031699	0.000401	-4.17897	0.11924	-0.261232	Kcnq5	potassium voltage-gated channel, subfamily Q, member 5
1417394_at	0.0319286	0.000407	4.1736	0.10708	0.349786	Klf4	Kruppel-like factor 4 (gut)
1438631_x_at	0.0319286	0.000407	-4.17316	0.10609	-0.274362	Ttc13	tetratricopeptide repeat domain 13
1455024_at	0.0319286	0.000407	-4.17286	0.10541	-0.202672	Tlk1	tousled-like kinase 1
1452380_at	0.0319286	0.000407	-4.17284	0.10536	-0.273205	Epha7	Eph receptor A7
1431423_a_at	0.0319286	0.000408	-4.17201	0.10348	-0.16308	Med8	mediator complex subunit 8
1417901_a_at	0.0319286	0.000409	-4.17105	0.1013	-0.162223	Ica1	islet cell autoantigen 1
1424854_at	0.0319286	0.000409	4.17097	0.10112	0.258771	Hist1h4m///Hist1h4b///Hist1h4a///Hist4h4///Hist1h4n///Hist1h4k///Hist1h4j///Hist1h4i///Hist1h4f///Hist1h4d///Hist1h4c///Hist2h4///Hist1h4h	histone cluster 1, H4m///histone cluster 1, H4b///histone cluster 1, H4a///histone cluster 4, H4///histone cluster 1, H4n///histone cluster 1, H4k///histone cluster 1, H4j///histone cluster 1, H4i///histone cluster 1, H4f///histone cluster 1, H4d///histone cluster 1, H4c///histone cluster 2, H4///histone cluster 1, H4h
1449158_at	0.0319981	0.000411	-4.16936	0.09748	-0.199145	Kcnk2	potassium channel, subfamily K, member 2
1455154_at	0.0322729	0.000415	-4.16512	0.08788	-0.2303	Gli3	GLI-Kruppel family member GLI3
1455728_at	0.032402	0.000418	-4.16232	0.08154	-0.162195	Pten	phosphatase and tensin homolog
1434275_at	0.032402	0.000418	4.16205	0.08094	0.210597	Nkd2	naked cuticle 2 homolog (Drosophila)
1420667_at	0.0324927	0.00042	4.16019	0.07673	0.244812	Doc2b	double C2, beta
1424904_at	0.0327005	0.000423	-4.15686	0.06917	-0.249915	Vwa8	von Willebrand factor A domain containing 8
1450520_at	0.0327538	0.000425	-4.15548	0.06605	-0.256756	Cacng3	calcium channel, voltage-dependent, gamma subunit 3
1449286_at	0.0327543	0.000426	-4.15405	0.06283	-0.269262	Ntng1	netrin G1
1457316_at	0.0327543	0.000427	4.15336	0.06127	0.318054	Map6	microtubule-associated protein 6
1455254_at	0.0327589	0.000428	-4.1526	0.05955	-0.179691	Gid8	GID complex subunit 8
1455042_at	0.0329263	0.000431	-4.14951	0.05256	-0.188256	Tbl1x	transducin (beta)-like 1 X-linked
1448706_at	0.0329263	0.000431	-4.1491	0.05162	-0.194473	Tdp2	tyrosyl-DNA phosphodiesterase 2
1421346_a_at	0.0329304	0.000432	-4.14835	0.04993	-0.281738	Slc6a6	solute carrier family 6 (neurotransmitter transporter, taurine), member 6
1436548_at	0.0331593	0.000436	-4.1448	0.04189	-0.20065	Lyrm9	LYR motif containing 9
1448205_at	0.0331983	0.000437	4.14361	0.03919	0.215704	Gm5593///Ccnb1	predicted gene 5593///cyclin B1
1436417_at	0.0331983	0.000438	4.14292	0.03764	0.198512	Slc19a3	solute carrier family 19, member 3
1460182_at	0.0333024	0.000441	-4.14052	0.03221	-0.18688	Snx4	sorting nexin 4
1426243_at	0.0333024	0.000441	4.13966	0.03025	0.272915	Cth	cystathionase (cystathionine gamma-lyase)
1435278_at	0.0333024	0.000442	-4.13956	0.03003	-0.220298	Sft2d3	SFT2 domain containing 3
1452731_x_at	0.0334736	0.000445	-4.13675	0.02368	-0.222186	LOC102638110///LOC100861615///Gm3164///Gm3173///Gm3739///Gm3696///Gm3667///Gm3194///Gm3558///Gm3488///Gm3500///Gm10409///Gm3383///Gm3264///Gm3252///Gm3239///Gm3636///Gm3115///Gm3095///Gm3002///Gm10340///Gm2897///Gm16525///Gm3373///Gm3317///Gm5796	uncharacterized LOC102638110///alpha takusan-like///predicted gene 3164///predicted gene 3173///predicted gene 3739///predicted gene 3696///predicted gene 3667///predicted gene 3194///predicted gene 3558///predicted gene, 3488///predicted gene 3500///predicted pseudogene 8348///predicted gene 3383///predicted gene 3264///predicted gene 3252///predicted gene 3239///predicted gene 3636///predicted …
1433543_at	0.033623	0.000448	4.13384	0.01709	0.222083	Anln	anillin, actin binding protein
1433864_at	0.033623	0.000448	-4.13354	0.01641	-0.181813	Lrp12	low density lipoprotein-related protein 12
1424291_at	0.0337067	0.000451	-4.13114	0.01099	-0.167241	Nup93	nucleoporin 93
1439491_at	0.0337911	0.000453	4.12943	0.00711	0.189681	Lrrc38	leucine rich repeat containing 38
1454086_a_at	0.034231	0.00046	-4.1227	-0.00811	-0.204255	Lmo2	LIM domain only 2
1437133_x_at	0.034231	0.00046	-4.12241	-0.00877	-0.207382	Gm6644///Akr1b3	Akr1b3 pseudogene///aldo-keto reductase family 1, member B3 (aldose reductase)
1460645_at	0.034231	0.000461	4.12205	-0.00959	0.246096	Chordc1	cysteine and histidine-rich domain (CHORD)-containing, zinc-binding protein 1
AFFX-TransRecMur/X57349_3_at	0.0342657	0.000462	-4.12095	-0.01208	-0.251765	Tfrc	transferrin receptor
1444934_at	0.0343029	0.000463	4.11977	-0.01475	0.205871	Zfp276	zinc finger protein (C2H2 type) 276
1447371_at	0.0343029	0.000464	4.11879	-0.01697	0.260491	9430037G07Rik	RIKEN cDNA 9430037G07 gene
1426364_at	0.0343029	0.000465	4.11847	-0.01768	0.191899	Mrrf	mitochondrial ribosome recycling factor
1452263_at	0.034469	0.000468	-4.1158	-0.02372	-0.220283	Slc35f4	solute carrier family 35, member F4
1437152_at	0.0345837	0.00047	-4.11374	-0.0284	-0.303984	Mex3b	mex3 RNA binding family member B
1458971_at	0.0345837	0.000471	4.11309	-0.02986	0.245589	Ap2b1	adaptor-related protein complex 2, beta 1 subunit
1422683_at	0.0346935	0.000473	-4.11111	-0.03434	-0.263306	Irak1bp1	interleukin-1 receptor-associated kinase 1 binding protein 1
1434973_at	0.0348636	0.000476	-4.10833	-0.04063	-0.233066	Car7	carbonic anhydrase 7
1431096_at	0.0348636	0.000478	4.10706	-0.04349	0.295462	Ints8	integrator complex subunit 8
1451808_at	0.0348636	0.000478	-4.10701	-0.04361	-0.299355	Kcnj4	potassium inwardly-rectifying channel, subfamily J, member 4
1456170_x_at	0.0348636	0.000479	4.10587	-0.04619	0.208574	Calr	calreticulin
1440324_at	0.0348636	0.000479	4.10575	-0.04646	0.169402	Mrpl19	mitochondrial ribosomal protein L19
1428198_at	0.0349025	0.000481	4.10462	-0.04901	0.20993	Adal	adenosine deaminase-like
1452901_at	0.0351471	0.000485	4.10082	-0.05761	0.180678	Creb1	cAMP responsive element binding protein 1
1427125_s_at	0.0351471	0.000486	-4.10041	-0.05853	-0.17755	Lrrc41	leucine rich repeat containing 41
1428301_at	0.0352109	0.000488	-4.09868	-0.06245	-0.227855	LOC102638110///LOC100861615///Gm3164///Gm3173///Gm3739///Gm3696///Gm3667///Gm3194///Gm3591///Gm3558///Gm3488///Gm3500///Gm3383///Gm3264///Gm3252///Gm3239///Gm3636///Gm3115///Gm3095///Gm10340///Gm2897///Gm2888///Gm10406///Gm3373///Gm3317///Gm5796	uncharacterized LOC102638110///alpha takusan-like///predicted gene 3164///predicted gene 3173///predicted gene 3739///predicted gene 3696///predicted gene 3667///predicted gene 3194///predicted gene 3591///predicted gene 3558///predicted gene, 3488///predicted gene 3500///predicted gene 3383///predicted gene 3264///predicted gene 3252///predicted gene 3239///predicted gene 3636///predicted gene 3…
1416563_at	0.0352109	0.000488	-4.09834	-0.06321	-0.183549	Ctps	cytidine 5'-triphosphate synthase
1435153_at	0.0354821	0.000492	-4.09452	-0.07186	-0.181229	Btbd6	BTB (POZ) domain containing 6
1439552_at	0.0354882	0.000493	-4.09379	-0.07351	-0.294111	Trio	triple functional domain (PTPRF interacting)
1422948_s_at	0.0359243	0.0005	4.08788	-0.08686	0.291329	Hist1h4m///Hist1h4b///Hist1h4a///Hist4h4///Hist1h4n///Hist1h4k///Hist1h4j///Hist1h4i///Hist1h4f///Hist1h4d///Hist1h4c///Hist2h4///Hist1h4h	histone cluster 1, H4m///histone cluster 1, H4b///histone cluster 1, H4a///histone cluster 4, H4///histone cluster 1, H4n///histone cluster 1, H4k///histone cluster 1, H4j///histone cluster 1, H4i///histone cluster 1, H4f///histone cluster 1, H4d///histone cluster 1, H4c///histone cluster 2, H4///histone cluster 1, H4h
1426437_s_at	0.0359243	0.000501	-4.08743	-0.08788	-0.219521	Hdac3	histone deacetylase 3
1448924_at	0.0359471	0.000502	4.08651	-0.08996	0.270873	Tmem186	transmembrane protein 186
1443925_at	0.0360917	0.000505	4.0842	-0.09519	0.236665	Gatsl2	GATS protein-like 2
1427683_at	0.0362201	0.000508	4.08208	-0.09998	0.288433	Egr2	early growth response 2
1416200_at	0.0362294	0.000508	-4.08133	-0.10169	-0.230825	Il33	interleukin 33
1420301_at	0.0363108	0.000511	4.07962	-0.10555	0.221412	AA414903	expressed sequence AA414903
1427467_a_at	0.0363108	0.000511	-4.0791	-0.10673	-0.236034	Rpgr	retinitis pigmentosa GTPase regulator
1452462_a_at	0.0365857	0.000516	4.07533	-0.11523	0.246253	Banp	BTG3 associated nuclear protein
1450250_at	0.0367712	0.000519	-4.0726	-0.12142	-0.1825	Otud7a	OTU domain containing 7A
1418066_at	0.0369447	0.000523	-4.07001	-0.12728	-0.23827	Cfl2	cofilin 2, muscle
1433528_at	0.0370901	0.000526	-4.06745	-0.13305	-0.262427	LOC102642697///Gtf2a2	transcription initiation factor IIA subunit 2 pseudogene///general transcription factor II A, 2
1416673_at	0.0370901	0.000526	-4.06709	-0.13386	-0.206676	Bace2	beta-site APP-cleaving enzyme 2
1416205_at	0.037135	0.000528	-4.06574	-0.13693	-0.195289	Glb1	galactosidase, beta 1
1428836_at	0.037135	0.000529	-4.06531	-0.1379	-0.187734	2300009A05Rik	RIKEN cDNA 2300009A05 gene
1436595_at	0.0371758	0.00053	-4.06421	-0.14038	-0.171967	Rbm34	RNA binding motif protein 34
1452805_at	0.0372189	0.000533	-4.06153	-0.14643	-0.274663	D11Wsu47e	DNA segment, Chr 11, Wayne State University 47, expressed
1435289_at	0.0372189	0.000533	4.06152	-0.14647	0.206902	Engase	endo-beta-N-acetylglucosaminidase
1421971_a_at	0.0372189	0.000534	-4.06124	-0.1471	-0.152108	Mrps34	mitochondrial ribosomal protein S34
1460495_s_at	0.0372189	0.000535	-4.06059	-0.14855	-0.161857	Htra2	HtrA serine peptidase 2
1416328_a_at	0.0372189	0.000535	4.06032	-0.14916	0.222982	Atp6v0e	ATPase, H+ transporting, lysosomal V0 subunit E
1416593_at	0.0372189	0.000537	-4.05871	-0.15281	-0.210964	Glrx	glutaredoxin
1431072_a_at	0.0372189	0.000537	4.05863	-0.15299	0.273645	Ccdc50	coiled-coil domain containing 50
1457702_at	0.0372953	0.00054	-4.05653	-0.15774	-0.279404	Gpr12	G-protein coupled receptor 12
1438729_at	0.0372953	0.00054	-4.05647	-0.15787	-0.289263	Sox1	SRY (sex determining region Y)-box 1
1460672_at	0.0372953	0.000541	-4.05588	-0.1592	-0.198051	2410002F23Rik	RIKEN cDNA 2410002F23 gene
1452585_at	0.0374311	0.000545	-4.05301	-0.16568	-0.183594	Mrps28	mitochondrial ribosomal protein S28
1451747_a_at	0.0374311	0.000545	4.05252	-0.16679	0.184986	Atg12	autophagy related 12
1419470_at	0.0374311	0.000546	-4.05215	-0.16762	-0.186271	Gnb4	guanine nucleotide binding protein (G protein), beta 4
1437378_x_at	0.0374311	0.000546	-4.05183	-0.16835	-0.237386	Scarb1	scavenger receptor class B, member 1
1421321_a_at	0.0374311	0.000547	4.05124	-0.16969	0.277493	Net1	neuroepithelial cell transforming gene 1
1436459_at	0.03753	0.000549	4.04952	-0.17357	0.266544	Gpr161	G protein-coupled receptor 161
1441022_at	0.0375441	0.000551	-4.04794	-0.17714	-0.238837	Arih1	ariadne RBR E3 ubiquitin protein ligase 1
1436758_at	0.0375441	0.000551	4.0478	-0.17745	0.25593	Hdac4	histone deacetylase 4
1456204_at	0.0375441	0.000552	-4.04735	-0.17849	-0.257261	Smim4	small integral membrane protein 4
1431181_a_at	0.0375441	0.000553	4.04687	-0.17956	0.218208	Luc7l	Luc7-like
1426031_a_at	0.0375542	0.000555	-4.04547	-0.18272	-0.218096	Nfatc2	nuclear factor of activated T cells, cytoplasmic, calcineurin dependent 2
1429832_at	0.0375542	0.000555	-4.04506	-0.18365	-0.310221	Gm17748///Ppih	peptidyl-prolyl cis-trans isomerase H-like///peptidyl prolyl isomerase H
1442135_at	0.0375542	0.000555	-4.0449	-0.18401	-0.223447	Ado	2-aminoethanethiol (cysteamine) dioxygenase
1440888_at	0.0377457	0.000559	4.04218	-0.19016	0.210564	Oxtr	oxytocin receptor
1436269_s_at	0.0379108	0.000562	-4.03976	-0.19562	-0.211689	Htra2	HtrA serine peptidase 2
1457118_at	0.0381395	0.000567	4.03653	-0.20292	0.218464	Shc4	SHC (Src homology 2 domain containing) family, member 4
1433478_at	0.0381395	0.000567	-4.03604	-0.20402	-0.193934	Parl	presenilin associated, rhomboid-like
1450868_at	0.0385389	0.000575	-4.03068	-0.21614	-0.167026	Hgsnat	heparan-alpha-glucosaminide N-acetyltransferase
1443888_at	0.0385389	0.000577	-4.02947	-0.21885	-0.264415	AU023762	expressed sequence AU023762
1424594_at	0.0385389	0.000577	-4.02929	-0.21928	-0.243925	Samd4	sterile alpha motif domain containing 4
1428306_at	0.0386123	0.000579	4.02789	-0.22243	0.304636	Ddit4	DNA-damage-inducible transcript 4
1435679_at	0.0388153	0.000583	-4.02481	-0.22939	-0.249046	Optn	optineurin
1436135_at	0.0388153	0.000584	-4.0245	-0.23008	-0.236519	Nlgn3///2900075N08Rik	neuroligin 3///RIKEN cDNA 2900075N08 gene
1424440_at	0.0390318	0.000588	4.0216	-0.23664	0.177604	Mrps6	mitochondrial ribosomal protein S6
1452868_at	0.0390617	0.00059	-4.02007	-0.2401	-0.19296	Usp24	ubiquitin specific peptidase 24
1458440_at	0.0391161	0.000591	4.01889	-0.24276	0.216429	Specc1	sperm antigen with calponin homology and coiled-coil domains 1
1453632_at	0.0391373	0.000593	-4.01806	-0.24464	-0.215002	AU022252///4930538K18Rik	expressed sequence AU022252///RIKEN cDNA 4930538K18 gene
1423841_at	0.039391	0.000597	4.01478	-0.25203	0.35259	Brix1	BRX1, biogenesis of ribosomes
1428915_at	0.0393992	0.000599	-4.01378	-0.25429	-0.259405	Sirt5	sirtuin 5
1416318_at	0.0393992	0.000599	-4.01347	-0.25499	-0.218304	Serpinb1a	serine (or cysteine) peptidase inhibitor, clade B, member 1a
1455161_at	0.0393992	0.0006	-4.01289	-0.2563	-0.22472	AI504432	expressed sequence AI504432
1434451_at	0.03946	0.000602	-4.01165	-0.2591	-0.171532	Atxn1	ataxin 1
1449181_at	0.0394716	0.000603	-4.01093	-0.26072	-0.264437	Fech	ferrochelatase
1418526_at	0.0397288	0.000608	4.00729	-0.26895	0.237123	Srsf10	serine/arginine-rich splicing factor 10
1455563_at	0.0397288	0.000609	-4.00667	-0.27035	-0.198075	Ddx49	DEAD (Asp-Glu-Ala-Asp) box polypeptide 49
1448144_at	0.0397288	0.00061	-4.00597	-0.27193	-0.234	Hnrnpab	heterogeneous nuclear ribonucleoprotein A/B
1437695_at	0.0397288	0.00061	-4.00586	-0.27218	-0.231172	Prokr2	prokineticin receptor 2
1447992_s_at	0.0397947	0.000612	-4.00458	-0.27507	-0.284032	Pcsk2	proprotein convertase subtilisin/kexin type 2
1434359_at	0.0400302	0.000617	-4.00154	-0.28191	-0.21822	Fam65b	family with sequence similarity 65, member B
1448312_at	0.0402268	0.000621	-3.99892	-0.28782	-0.188237	Pcsk2	proprotein convertase subtilisin/kexin type 2
1448888_at	0.0403018	0.000623	-3.99756	-0.2909	-0.175875	Ppp1r7	protein phosphatase 1, regulatory (inhibitor) subunit 7
1417706_at	0.0403625	0.000625	-3.9959	-0.29465	-0.216661	Naglu	alpha-N-acetylglucosaminidase (Sanfilippo disease IIIB)
1451809_s_at	0.0403625	0.000626	-3.99576	-0.29497	-0.346328	Rwdd3	RWD domain containing 3
1426235_a_at	0.0404052	0.000627	3.99473	-0.29729	0.202867	Glul	glutamate-ammonia ligase (glutamine synthetase)
1439495_at	0.0404781	0.000629	-3.99339	-0.3003	-0.268118	Uvssa	UV stimulated scaffold protein A
1431831_at	0.0405461	0.000632	3.99173	-0.30406	0.174088	Slx4ip	SLX4 interacting protein
1434996_at	0.0405461	0.000632	-3.99152	-0.30453	-0.323842	Slc25a16	solute carrier family 25 (mitochondrial carrier, Graves disease autoantigen), member 16
1427384_at	0.0413796	0.000648	-3.98151	-0.32711	-0.258635	Chd6	chromodomain helicase DNA binding protein 6
1434003_a_at	0.0413796	0.000648	-3.98135	-0.32747	-0.22167	Dhps	deoxyhypusine synthase
1436862_at	0.0414968	0.000651	-3.9796	-0.33142	-0.206033	Doc2a	double C2, alpha
1435940_at	0.0415655	0.000652	-3.97833	-0.33428	-0.203023	Dclk1	doublecortin-like kinase 1
1455277_at	0.0415952	0.000655	3.977	-0.33728	0.237581	Hhip	Hedgehog-interacting protein
1434290_at	0.0415952	0.000655	-3.97665	-0.33807	-0.20051	Gtdc1	glycosyltransferase-like domain containing 1
1455592_at	0.0415952	0.000657	-3.97575	-0.3401	-0.290264	Vangl2	vang-like 2 (van gogh, Drosophila)
1436107_at	0.0415952	0.000657	-3.97571	-0.3402	-0.234813	Lsm8	LSM8 homolog, U6 small nuclear RNA associated
1426111_x_at	0.0417986	0.000663	3.97145	-0.3498	0.175737	Irf3	interferon regulatory factor 3
1436411_at	0.0417986	0.000663	-3.97143	-0.34986	-0.29855	Atp13a5	ATPase type 13A5
1428073_a_at	0.0417986	0.000664	-3.97141	-0.3499	-0.148624	Nup88	nucleoporin 88
1451459_at	0.0417986	0.000664	3.97138	-0.34997	0.182225	Ahctf1	AT hook containing transcription factor 1
1421952_at	0.0420892	0.000669	3.96794	-0.35773	0.199681	Capn6	calpain 6
1441228_at	0.0420906	0.00067	3.96735	-0.35906	0.241964	Apold1	apolipoprotein L domain containing 1
1456779_a_at	0.0423938	0.000676	-3.96353	-0.36766	-0.237919	Particl	promoter of Mat2a antisense radiation induced circulating long non-coding RNA
1423450_a_at	0.0423938	0.000677	-3.96287	-0.36915	-0.239393	Hs3st1	heparan sulfate (glucosamine) 3-O-sulfotransferase 1
1420123_at	0.0423938	0.000679	-3.96194	-0.37124	-0.181769	Tcta	T cell leukemia translocation altered gene
1423075_at	0.0423938	0.000679	3.96193	-0.37128	0.154902	Lman2	lectin, mannose-binding 2
1430338_at	0.0423938	0.00068	-3.96113	-0.37308	-0.249889	4122401K19Rik	RIKEN cDNA 4122401K19 gene
1423905_at	0.0423938	0.000681	3.96094	-0.37351	0.19323	Pvr	poliovirus receptor
1435248_a_at	0.0424131	0.000683	3.95938	-0.37703	0.231547	Btaf1	B-TFIID TATA-box binding protein associated factor 1
1428558_at	0.0424131	0.000683	-3.95918	-0.37747	-0.17894	Osgepl1	O-sialoglycoprotein endopeptidase-like 1
1416129_at	0.0424131	0.000684	3.95904	-0.37779	0.205838	Errfi1	ERBB receptor feedback inhibitor 1
1416826_a_at	0.0426826	0.00069	3.95529	-0.38625	0.24244	Med20	mediator complex subunit 20
1422981_at	0.0427268	0.000692	3.95429	-0.38849	0.180186	Dgcr8	DiGeorge syndrome critical region gene 8
1455302_at	0.0427372	0.000693	-3.95317	-0.39103	-0.162998	Vps29	VPS29 retromer complex component
1437223_s_at	0.0427372	0.000694	3.95306	-0.39127	0.211679	Xbp1	X-box binding protein 1
1439002_s_at	0.0427611	0.000695	3.95226	-0.39306	0.21171	Prl3d2///Prl3d1	prolactin family 3, subfamily d, member 1///prolactin family 3, subfamily d, member 1
1430295_at	0.0428229	0.000697	-3.9511	-0.39568	-0.31671	Gna13	guanine nucleotide binding protein, alpha 13
1427124_at	0.0429151	0.000699	-3.94965	-0.39895	-0.229367	4932416H05Rik	RIKEN cDNA 4932416H05 gene
1418754_at	0.0429857	0.000702	-3.94836	-0.40187	-0.406245	Adcy8	adenylate cyclase 8
1456302_at	0.0429857	0.000702	-3.94785	-0.40302	-0.255541	Pex6	peroxisomal biogenesis factor 6
1456700_x_at	0.0431919	0.000707	-3.94531	-0.40874	-0.247727	Marcks	myristoylated alanine rich protein kinase C substrate
1429059_s_at	0.0433159	0.00071	3.94356	-0.41267	0.216463	Tmem107	transmembrane protein 107
1429650_at	0.0433967	0.000712	3.94223	-0.41567	0.181272	Stk40	serine/threonine kinase 40
1455017_a_at	0.0436582	0.000718	-3.93863	-0.42378	-0.259356	Zmym3	zinc finger, MYM-type 3
1434203_at	0.0437052	0.00072	3.93763	-0.42604	0.232592	Fam107a	family with sequence similarity 107, member A
1423474_at	0.0439311	0.000725	3.93494	-0.4321	0.163951	Top1	topoisomerase (DNA) I
1455056_at	0.0439313	0.000726	-3.93438	-0.43336	-0.290167	Lmo7	LIM domain only 7
1456392_at	0.0440915	0.000729	-3.93232	-0.438	-0.194776	Negr1	neuronal growth regulator 1
1423183_at	0.0441066	0.000731	-3.93163	-0.43956	-0.212061	Lgi1	leucine-rich repeat LGI family, member 1
1422640_at	0.04441	0.000737	-3.92779	-0.44821	-0.270919	Pcdhb9	protocadherin beta 9
1435737_a_at	0.04441	0.000738	3.92752	-0.44883	0.213187	Nde1	nudE neurodevelopment protein 1
1427172_at	0.04441	0.000739	-3.92713	-0.44969	-0.242117	Ofd1	oral-facial-digital syndrome 1 gene homolog (human)
1447729_s_at	0.0445953	0.000743	3.92485	-0.45483	0.212594	Prss44	protease, serine 44
1443163_at	0.0445953	0.000744	3.92431	-0.45605	0.429082	Slc39a2	solute carrier family 39 (zinc transporter), member 2
1425140_at	0.0446248	0.000745	-3.92349	-0.4579	-0.226054	Lactb2	lactamase, beta 2
1423608_at	0.0446375	0.000747	-3.92265	-0.4598	-0.2483	Itm2a	integral membrane protein 2A
1430660_at	0.0446375	0.000747	3.92227	-0.46064	0.259465	1500004A13Rik	RIKEN cDNA 1500004A13 gene
1455385_at	0.0447976	0.000751	-3.92024	-0.46521	-0.183978	Exoc6///Sh3glb1	exocyst complex component 6///SH3-domain GRB2-like B1 (endophilin)
1422535_at	0.0448558	0.000753	-3.91916	-0.46765	-0.227976	Ccne2	cyclin E2
1452980_at	0.0450734	0.000758	-3.91661	-0.47339	-0.213586	2810468N07Rik	RIKEN cDNA 2810468N07 gene
1430133_at	0.0455031	0.000766	-3.91214	-0.48345	-0.238824	Tbc1d8b	TBC1 domain family, member 8B
1434424_at	0.0455948	0.000768	-3.91076	-0.48655	-0.242438	Mfsd7b	major facilitator superfamily domain containing 7B
1419583_at	0.0456678	0.000771	-3.90956	-0.48927	-0.232419	Cbx4	chromobox 4
1450850_at	0.0457867	0.000775	3.90739	-0.49414	0.216312	Ezr	ezrin
1459749_s_at	0.0458385	0.000777	-3.90636	-0.49647	-0.290373	Fat4	FAT atypical cadherin 4
1456026_at	0.0458385	0.000778	-3.90568	-0.498	-0.227193	Nhlrc3	NHL repeat containing 3
1449732_at	0.0458385	0.000779	-3.9053	-0.49884	-0.374393	Zscan21	zinc finger and SCAN domain containing 21
1428976_at	0.0460653	0.000783	-3.90272	-0.50466	-0.224964	Tmpo	thymopoietin
1416865_at	0.046318	0.00079	-3.89932	-0.51232	-0.196236	Fgd1	FYVE, RhoGEF and PH domain containing 1
1447920_at	0.046318	0.00079	3.89923	-0.51251	0.238128	Atxn10	ataxin 10
1453366_at	0.046318	0.000791	-3.89884	-0.51339	-0.221544	Tdrkh	tudor and KH domain containing protein
1435487_at	0.0468902	0.000802	-3.89322	-0.52603	-0.211979	Grid2	glutamate receptor, ionotropic, delta 2
1456516_x_at	0.0471464	0.000807	-3.89034	-0.53252	-0.289793	Uap1	UDP-N-acetylglucosamine pyrophosphorylase 1
1415698_at	0.0471464	0.000808	3.88989	-0.53352	0.205514	Golm1	golgi membrane protein 1
1455633_at	0.0471923	0.00081	-3.88895	-0.53563	-0.153625	Zfp647	zinc finger protein 647
1455525_at	0.0472329	0.000812	3.88806	-0.53764	0.191513	Exog	endo/exonuclease (5'-3'), endonuclease G-like
1444468_at	0.0473326	0.000815	3.88653	-0.54109	0.273205	Paqr8	progestin and adipoQ receptor family member VIII
1417489_at	0.0474476	0.000818	-3.88459	-0.54546	-0.281324	Npy2r	neuropeptide Y receptor Y2
1419163_s_at	0.0474545	0.00082	3.884	-0.54679	0.193148	Dnajc3	DnaJ heat shock protein family (Hsp40) member C3
1417348_at	0.0475668	0.000823	-3.88248	-0.55019	-0.195557	2310039H08Rik	RIKEN cDNA 2310039H08 gene
1427274_at	0.0475941	0.000824	-3.88172	-0.55191	-0.234202	Rnf214	ring finger protein 214
1457894_at	0.0477586	0.000829	3.87934	-0.55725	0.254896	Mettl11b	methyltransferase like 11B
1450626_at	0.0477586	0.00083	-3.87856	-0.55901	-0.219527	Manba	mannosidase, beta A, lysosomal
1460595_at	0.0477586	0.000831	-3.87833	-0.55952	-0.248796	Syt14	synaptotagmin XIV
1438134_at	0.0477586	0.000831	-3.87817	-0.55988	-0.271219	Pcdh10	protocadherin 10
1441974_at	0.0481197	0.00084	-3.87365	-0.57006	-0.237479	Camk4	calcium/calmodulin-dependent protein kinase IV
1457229_at	0.0481197	0.000841	-3.87354	-0.5703	-0.206541	Gpr173	G-protein coupled receptor 173
1422460_at	0.0481197	0.000841	-3.87347	-0.57045	-0.225499	Mad2l1	MAD2 mitotic arrest deficient-like 1
1456226_x_at	0.0484945	0.00085	-3.86905	-0.58041	-0.272367	Ddr1	discoidin domain receptor family, member 1
1418527_a_at	0.0484945	0.00085	3.8689	-0.58074	0.259537	Srsf10	serine/arginine-rich splicing factor 10
1442165_at	0.0484945	0.000851	3.86847	-0.58169	0.237875	Armc9	armadillo repeat containing 9
1419450_at	0.0484945	0.000852	3.86816	-0.5824	0.191246	Gm12538///Ormdl3	predicted gene 12538///ORM1-like 3 (S. cerevisiae)
1453195_at	0.0484945	0.000853	-3.86764	-0.58356	-0.199671	Sdccag3	serologically defined colon cancer antigen 3
1434865_a_at	0.0485153	0.000854	-3.86694	-0.58514	-0.164961	Exoc7	exocyst complex component 7
1417574_at	0.0485325	0.000856	-3.86588	-0.58753	-0.237935	Cxcl12	chemokine (C-X-C motif) ligand 12
1441947_x_at	0.0485325	0.000857	-3.86575	-0.58781	-0.212309	Sik3	SIK family kinase 3
1444154_at	0.0485825	0.000859	3.86481	-0.58994	0.207118	Gm4943///Ndufa11	predicted pseudogene 4943///NADH dehydrogenase (ubiquinone) 1 alpha subcomplex 11
1428074_at	0.0486044	0.000861	-3.86379	-0.59222	-0.21663	Tmem158	transmembrane protein 158
1434542_at	0.0486123	0.000862	3.863	-0.594	0.30514	Gpt2	glutamic pyruvate transaminase (alanine aminotransferase) 2
1452211_at	0.0486173	0.000864	-3.86212	-0.59598	-0.223546	Psme4	proteasome (prosome, macropain) activator subunit 4
1419426_s_at	0.0486173	0.000865	-3.86192	-0.59642	-0.251598	Gm21541///Gm1987///Gm13304///Gm10591///Ccl21b///LOC100041593///LOC100041504///Ccl21c///Ccl21a	predicted gene, 21541///predicted gene 1987///predicted gene 13304///predicted gene 10591///chemokine (C-C motif) ligand 21B (leucine)///C-C motif chemokine 21c///C-C motif chemokine 21c///chemokine (C-C motif) ligand 21C (leucine)///chemokine (C-C motif) ligand 21A (serine)
1434321_at	0.0488188	0.000869	-3.85969	-0.60144	-0.242902	Atrip	ATR interacting protein
1438067_at	0.0491268	0.000876	-3.85657	-0.60845	-0.188384	Nf1	neurofibromatosis 1
1427373_at	0.0491896	0.000878	-3.85553	-0.6108	-0.208507	Amigo1	adhesion molecule with Ig like domain 1
1456946_at	0.0492601	0.00088	3.85442	-0.61328	0.19732	Sh3rf3	SH3 domain containing ring finger 3
1455619_at	0.0493303	0.000883	3.85332	-0.61576	0.238789	LOC102643247///BC062258	uncharacterized LOC102643247///cDNA sequence BC062258
1436284_s_at	0.0493606	0.000884	3.85255	-0.61749	0.186603	Zfp319	zinc finger protein 319
1457748_at	0.049378	0.000886	3.85189	-0.61897	0.207226	Pogz	pogo transposable element with ZNF domain
1454840_at	0.0494947	0.00089	-3.85008	-0.62302	-0.191829	Mccc2	methylcrotonoyl-Coenzyme A carboxylase 2 (beta)
1435127_a_at	0.0494947	0.00089	-3.84983	-0.62359	-0.200094	Osgepl1	O-sialoglycoprotein endopeptidase-like 1
1459120_at	0.0494947	0.000892	3.84903	-0.6254	0.215563	Epb41l5	erythrocyte membrane protein band 4.1 like 5
1423479_at	0.0494947	0.000892	-3.84887	-0.62576	-0.187077	Nol11	nucleolar protein 11
1460399_at	0.049506	0.000894	3.84817	-0.62731	0.248355	Ccdc117	coiled-coil domain containing 117
1433868_at	0.049506	0.000895	-3.84775	-0.62826	-0.197478	Btbd3	BTB (POZ) domain containing 3
1454706_at	0.0495186	0.000897	-3.84667	-0.63069	-0.170208	Uvrag	UV radiation resistance associated gene
1445381_at	0.0495186	0.000897	-3.84663	-0.63077	-0.26123	Pcbp2	poly(rC) binding protein 2
1424355_a_at	0.0501603	0.000911	-3.84031	-0.64498	-0.223456	Sin3b	transcriptional regulator, SIN3B (yeast)
1419402_at	0.0504056	0.000918	3.83725	-0.65184	0.271868	Mns1	meiosis-specific nuclear structural protein 1
1435089_at	0.050584	0.000922	-3.83528	-0.65627	-0.182621	2010111I01Rik	RIKEN cDNA 2010111I01 gene
1428910_at	0.050666	0.000926	-3.83346	-0.66037	-0.195197	2310022B05Rik	RIKEN cDNA 2310022B05 gene
1422123_s_at	0.050666	0.000926	3.83336	-0.66059	0.191618	Ceacam2///Ceacam1	carcinoembryonic antigen-related cell adhesion molecule 2///carcinoembryonic antigen-related cell adhesion molecule 1
1429736_at	0.050666	0.000929	-3.83215	-0.6633	-0.264338	Qk	quaking
1445745_at	0.050666	0.00093	3.83179	-0.66412	0.251449	Rbm17	RNA binding motif protein 17
1443957_at	0.050666	0.00093	3.83167	-0.66438	0.208795	Dixdc1	DIX domain containing 1
1455003_at	0.050666	0.000932	3.83061	-0.66676	0.166958	Thap1	THAP domain containing, apoptosis associated protein 1
1449234_at	0.050666	0.000935	3.82933	-0.66963	0.181237	Car15	carbonic anhydrase 15
1456607_at	0.050666	0.000935	-3.82931	-0.66967	-0.277732	Vcpip1	valosin containing protein (p97)/p47 complex interacting protein 1
1434493_at	0.050666	0.000936	-3.82921	-0.66991	-0.254439	1810022K09Rik	RIKEN cDNA 1810022K09 gene
1448584_at	0.050666	0.000936	-3.82911	-0.67012	-0.220378	Rsrc1	arginine/serine-rich coiled-coil 1
1420896_at	0.050666	0.000938	3.82792	-0.67279	0.175095	Snap23	synaptosomal-associated protein 23
1448714_at	0.050666	0.000941	3.82681	-0.67528	0.208209	Rngtt	RNA guanylyltransferase and 5'-phosphatase
1454482_at	0.050666	0.000942	3.82621	-0.67664	0.216936	5830474E16Rik	RIKEN cDNA 5830474E16 gene
1435551_at	0.050666	0.000944	-3.82543	-0.67838	-0.348739	Fhod3	formin homology 2 domain containing 3
1429138_at	0.050666	0.000945	-3.82493	-0.67951	-0.197251	Npas3	neuronal PAS domain protein 3
1427864_at	0.050666	0.000946	3.82464	-0.68016	0.167531	Hist1h3a///Hist2h3b///Hist1h3i///Hist1h3h///Hist1h3e///Hist1h3b///Hist1h3d///Hist1h3c///Hist1h3f///Hist1h3g///Hist2h3c2///Hist2h3c1	histone cluster 1, H3a///histone cluster 2, H3b///histone cluster 1, H3i///histone cluster 1, H3h///histone cluster 1, H3e///histone cluster 1, H3b///histone cluster 1, H3d///histone cluster 1, H3c///histone cluster 1, H3f///histone cluster 1, H3g///histone cluster 2, H3c2///histone cluster 2, H3c1
1448633_at	0.050666	0.000946	-3.82439	-0.68073	-0.164055	Prpf31	pre-mRNA processing factor 31
1415948_at	0.050666	0.000947	-3.82418	-0.68119	-0.188492	Creg1	cellular repressor of E1A-stimulated genes 1
1431846_at	0.050666	0.000948	3.8239	-0.68183	0.20437	4930546C10Rik	RIKEN cDNA 4930546C10 gene
1420376_a_at	0.050666	0.000948	-3.82367	-0.68235	-0.152516	Gm12657///Gm6749///H3f3c///Gm10257///H3f3b///H3f3a	predicted gene 12657///predicted pseudogene 6749///H3 histone, family 3C///H3 histone, family 3A pseudogene///H3 histone, family 3B///H3 histone, family 3A
1456961_at	0.050666	0.00095	-3.82295	-0.68395	-0.271555	Eny2	enhancer of yellow 2 homolog (Drosophila)
1438628_x_at	0.050666	0.00095	-3.82284	-0.68421	-0.301338	Cntn3	contactin 3
1436346_at	0.050666	0.000951	-3.82261	-0.68472	-0.225851	Cd109	CD109 antigen
1436657_at	0.050666	0.000952	3.82207	-0.68592	0.213651	Gm11744	predicted gene 11744
1460021_at	0.050666	0.000953	-3.82173	-0.6867	-0.22078	Gm6658	predicted gene 6658
1439900_at	0.050666	0.000953	3.8217	-0.68675	0.183476	Zfhx2	zinc finger homeobox 2
1426306_a_at	0.0509585	0.00096	-3.81836	-0.69425	-0.203682	Maged2	melanoma antigen, family D, 2
1455043_at	0.0509799	0.000962	3.81758	-0.69601	0.219916	Tnpo1	transportin 1
1455103_at	0.0509799	0.000964	-3.81697	-0.69738	-0.161342	Ddx46	DEAD (Asp-Glu-Ala-Asp) box polypeptide 46
1416223_at	0.0509799	0.000965	3.81622	-0.69906	0.151621	Sh3bp5l	SH3 binding domain protein 5 like
1442119_at	0.0509799	0.000965	3.81622	-0.69906	0.281735	AI449212	expressed sequence AI449212
1455333_at	0.0509998	0.000967	3.81535	-0.70102	0.181604	Tns3	tensin 3
1424569_at	0.0509998	0.000968	-3.81509	-0.7016	-0.181234	Ddx46	DEAD (Asp-Glu-Ala-Asp) box polypeptide 46
1456280_at	0.0510235	0.00097	-3.8144	-0.70315	-0.209148	Clspn	claspin
1440914_s_at	0.0510235	0.000972	-3.81341	-0.70537	-0.214256	Aftph	aftiphilin
1436014_a_at	0.0510235	0.000973	-3.81313	-0.706	-0.219832	Rusc1	RUN and SH3 domain containing 1
1424317_at	0.0510235	0.000973	3.81286	-0.70661	0.159432	Slc25a19	solute carrier family 25 (mitochondrial thiamine pyrophosphate carrier), member 19
1449839_at	0.0510235	0.000975	-3.81225	-0.70797	-0.183038	Casp3	caspase 3
1423904_a_at	0.0510235	0.000975	3.81189	-0.70877	0.248268	Pvr	poliovirus receptor
1423728_at	0.0510403	0.000978	-3.8109	-0.71099	-0.134536	Eif3l	eukaryotic translation initiation factor 3, subunit L
1430651_s_at	0.0510589	0.000979	3.81027	-0.71241	0.201865	Zfp24	zinc finger protein 24
AFFX-TransRecMur/X57349_M_at	0.0510657	0.000981	-3.80961	-0.71389	-0.243469	Tfrc	transferrin receptor
1440500_at	0.0510657	0.000982	-3.80926	-0.71468	-0.310037	Map3k10	mitogen-activated protein kinase kinase kinase 10
1417777_at	0.0511447	0.000986	3.80727	-0.71914	0.206577	Ptgr1	prostaglandin reductase 1
1435179_at	0.0511447	0.000987	-3.80718	-0.71933	-0.261059	C130071C03Rik	RIKEN cDNA C130071C03 gene
1437488_at	0.0511856	0.000989	-3.80606	-0.72185	-0.271496	Slc9a9	solute carrier family 9 (sodium/hydrogen exchanger), member 9
1428369_s_at	0.0511856	0.00099	-3.80567	-0.72272	-0.236861	Arhgap21	Rho GTPase activating protein 21
1437947_x_at	0.0511856	0.000991	-3.80542	-0.72328	-0.199314	Vdac1	voltage-dependent anion channel 1
1429554_at	0.0512116	0.000994	-3.80402	-0.72644	-0.180041	Sdccag3	serologically defined colon cancer antigen 3
1434393_at	0.0512116	0.000995	-3.80379	-0.72694	-0.203787	Usp34	ubiquitin specific peptidase 34
1416072_at	0.0513461	0.000998	-3.80223	-0.73045	-0.204427	Cd34	CD34 antigen
1429614_at	0.051698	0.00101	3.79892	-0.73786	0.147373	Prpf18	pre-mRNA processing factor 18
1431320_a_at	0.0520956	0.00102	-3.79527	-0.74604	-0.212631	Myo5a	myosin VA
1426604_at	0.0521366	0.00102	-3.7944	-0.74799	-0.230661	Rnasel	ribonuclease L (2', 5'-oligoisoadenylate synthetase-dependent)
1422433_s_at	0.0521366	0.00102	-3.79387	-0.7492	-0.186187	Idh1	isocitrate dehydrogenase 1 (NADP+), soluble
1435351_at	0.0521366	0.00102	-3.79353	-0.74995	-0.205514	Bend5	BEN domain containing 5
1440227_at	0.0521411	0.00102	3.79303	-0.75108	0.236567	Slc5a3	solute carrier family 5 (inositol transporters), member 3
1420384_at	0.0522407	0.00102	3.79176	-0.75391	0.20745	Col4a3bp	collagen, type IV, alpha 3 (Goodpasture antigen) binding protein
1439869_at	0.0527527	0.00104	3.78725	-0.76403	0.214731	Zfp493	zinc finger protein 493
1448484_at	0.0527944	0.00104	3.78645	-0.76582	0.154201	Amd1	S-adenosylmethionine decarboxylase 1
1450785_at	0.0529218	0.00104	3.78462	-0.76993	0.256147	Trip4	thyroid hormone receptor interactor 4
1432290_at	0.0529218	0.00104	3.78452	-0.77016	0.206641	1700040G22Rik	RIKEN cDNA 1700040G22 gene
1417606_a_at	0.0530106	0.00104	3.78335	-0.77276	0.222079	Calr	calreticulin
1442595_at	0.0532483	0.00105	3.78051	-0.77913	0.185102	Gm2115	predicted gene 2115
1428209_at	0.0532483	0.00105	-3.77969	-0.78097	-0.16431	Bex4	brain expressed X-linked 4
1431644_a_at	0.0532483	0.00105	-3.77963	-0.7811	-0.221329	Ica1	islet cell autoantigen 1
1433500_at	0.0532525	0.00106	3.77869	-0.78321	0.205316	Dennd2a	DENN/MADD domain containing 2A
1434098_at	0.0532525	0.00106	-3.77836	-0.78395	-0.348561	Glra2	glycine receptor, alpha 2 subunit
1440555_at	0.0532525	0.00106	-3.77776	-0.78528	-0.172355	Rragd	Ras-related GTP binding D
1435160_at	0.0532525	0.00106	3.77775	-0.78533	0.182894	Ahsa2	AHA1, activator of heat shock protein ATPase 2
1423270_at	0.0533814	0.00106	3.77628	-0.78861	0.280881	Nedd4l	neural precursor cell expressed, developmentally down-regulated gene 4-like
1455000_at	0.0534335	0.00107	3.77519	-0.79104	0.18594	Gpr68	G protein-coupled receptor 68
1431098_at	0.0534335	0.00107	3.77495	-0.79159	0.235404	Clip1	CAP-GLY domain containing linker protein 1
1416967_at	0.0534648	0.00107	-3.77407	-0.79357	-0.303822	Sox2	SRY (sex determining region Y)-box 2
1426925_at	0.0534648	0.00107	-3.77355	-0.79471	-0.208507	Rc3h2	ring finger and CCCH-type zinc finger domains 2
1450941_at	0.0534648	0.00107	-3.77333	-0.79523	-0.202238	Sdcbp	syndecan binding protein
1457568_at	0.0536135	0.00107	-3.77171	-0.79884	-0.191077	Hnrnpd	heterogeneous nuclear ribonucleoprotein D
1420088_at	0.0536149	0.00108	3.77079	-0.80092	0.275637	Nfkbia	nuclear factor of kappa light polypeptide gene enhancer in B cells inhibitor, alpha
1460226_at	0.0537111	0.00108	3.76946	-0.80388	0.230312	Trap1a	tumor rejection antigen P1A
1428972_at	0.0537111	0.00108	-3.76913	-0.80463	-0.293101	Tctex1d2	Tctex1 domain containing 2
1416586_at	0.0539519	0.00109	-3.76562	-0.81249	-0.16657	Zfp239	zinc finger protein 239
1426417_at	0.0539519	0.00109	-3.76554	-0.81266	-0.172044	Yipf4	Yip1 domain family, member 4
1452484_at	0.0539519	0.00109	-3.76544	-0.81288	-0.180812	Car7	carbonic anhydrase 7
1440487_at	0.0540458	0.0011	-3.76336	-0.81755	-0.257981	Dcc	deleted in colorectal carcinoma
1434724_at	0.0540458	0.0011	3.76312	-0.81809	0.182939	Usp31	ubiquitin specific peptidase 31
1424912_at	0.0540458	0.0011	-3.76297	-0.81841	-0.177944	Slc25a17	solute carrier family 25 (mitochondrial carrier, peroxisomal membrane protein), member 17
1423723_s_at	0.0540458	0.0011	3.76251	-0.81945	0.165225	Tardbp	TAR DNA binding protein
1457465_at	0.0540458	0.0011	-3.76245	-0.81958	-0.236998	Shroom4	shroom family member 4
1435475_at	0.0541739	0.0011	3.76071	-0.82348	0.17535	Lman2l	lectin, mannose-binding 2-like
1447931_at	0.0541739	0.0011	-3.76056	-0.82381	-0.236121	Whsc1l1	Wolf-Hirschhorn syndrome candidate 1-like 1 (human)
1438453_at	0.0542396	0.00111	3.75961	-0.82595	0.246923	Rad51c	RAD51 paralog C
1417106_at	0.0543713	0.00111	3.75815	-0.82921	0.159029	Tpd52l2	tumor protein D52-like 2
1430023_at	0.0544467	0.00111	-3.75698	-0.83183	-0.230895	Spata24	spermatogenesis associated 24
1421110_at	0.0544467	0.00111	3.75667	-0.83251	0.22483	Mtdh	metadherin
1448569_at	0.0546508	0.00112	3.75422	-0.83801	0.167053	Mlec	malectin
1424955_at	0.0547477	0.00112	-3.75285	-0.84108	-0.17219	Haus1	HAUS augmin-like complex, subunit 1
1423666_s_at	0.0547477	0.00113	-3.75259	-0.84166	-0.146545	Rpl5///Rpl5-ps2	ribosomal protein L5///ribisomal protein L5, pseudogene 2
1433488_x_at	0.0547869	0.00113	-3.75181	-0.84339	-0.220028	Gns	glucosamine (N-acetyl)-6-sulfatase
1426368_at	0.0547869	0.00113	3.7514	-0.84433	0.24664	Rin2	Ras and Rab interactor 2
1428958_at	0.0552026	0.00114	3.74758	-0.85286	0.234224	Paqr8	progestin and adipoQ receptor family member VIII
1421115_a_at	0.0552026	0.00114	-3.74656	-0.85514	-0.143631	Zdhhc16	zinc finger, DHHC domain containing 16
1428223_at	0.0552026	0.00114	3.7463	-0.85573	0.308651	Mfsd2a	major facilitator superfamily domain containing 2A
1426614_at	0.0552026	0.00114	3.74607	-0.85624	0.24741	Zmynd8	zinc finger, MYND-type containing 8
1450909_at	0.0552026	0.00114	-3.74602	-0.85635	-0.19187	Eif4e	eukaryotic translation initiation factor 4E
1451303_at	0.0552717	0.00115	-3.74506	-0.8585	-0.179396	Nrde2	nrde-2 necessary for RNA interference, domain containing
1443486_at	0.0553227	0.00115	-3.74386	-0.8612	-0.226763	Cog7	component of oligomeric golgi complex 7
1440867_at	0.0553227	0.00115	3.74325	-0.86256	0.227649	Spry4	sprouty homolog 4 (Drosophila)
1455959_s_at	0.0553227	0.00115	-3.7431	-0.86289	-0.143947	Gclc	glutamate-cysteine ligase, catalytic subunit
1437306_at	0.0553227	0.00115	-3.74245	-0.86435	-0.233784	Ccser1	coiled-coil serine rich 1
1453282_at	0.0553227	0.00116	-3.74173	-0.86596	-0.299442	Cxadr	coxsackie virus and adenovirus receptor
1452139_at	0.0553227	0.00116	-3.74172	-0.86598	-0.193343	Slc35c1	solute carrier family 35, member C1
1416083_at	0.0553227	0.00116	-3.74116	-0.86724	-0.181203	Zfand5	zinc finger, AN1-type domain 5
1417185_at	0.0553227	0.00116	3.74114	-0.86728	0.230957	Ly6a	lymphocyte antigen 6 complex, locus A
1448128_at	0.0553744	0.00116	-3.74031	-0.86913	-0.170093	Ctsa	cathepsin A
1435913_at	0.0558732	0.00117	-3.73614	-0.87845	-0.177148	B4galnt4	beta-1,4-N-acetyl-galactosaminyl transferase 4
1456926_at	0.0559099	0.00117	3.73543	-0.88004	0.278327	Rims4	regulating synaptic membrane exocytosis 4
1437334_x_at	0.056328	0.00119	-3.73088	-0.89021	-0.184513	Parn	poly(A)-specific ribonuclease (deadenylation nuclease)
1424275_s_at	0.056328	0.00119	-3.73085	-0.89029	-0.202738	Trim41	tripartite motif-containing 41
1438322_x_at	0.056328	0.00119	-3.73066	-0.8907	-0.170271	Fdft1	farnesyl diphosphate farnesyl transferase 1
1455836_at	0.056328	0.00119	3.73056	-0.89095	0.182483	Papola	poly (A) polymerase alpha
1454934_at	0.056328	0.00119	3.73014	-0.89187	0.1821	Ppm1f	protein phosphatase 1F (PP2C domain containing)
1436790_a_at	0.0564225	0.00119	3.72901	-0.8944	0.29107	Sox11	SRY (sex determining region Y)-box 11
1451146_at	0.0564746	0.00119	-3.72819	-0.89624	-0.202375	Zfp386	zinc finger protein 386 (Kruppel-like)
1455460_at	0.0565461	0.0012	-3.72679	-0.89936	-0.358903	Mir124-2hg	Mir124-2 host gene (non-protein coding)
1426946_at	0.0566303	0.0012	-3.72539	-0.90249	-0.201806	Ipo5	importin 5
1417061_at	0.0566303	0.0012	-3.7253	-0.90269	-0.292172	Slc40a1	solute carrier family 40 (iron-regulated transporter), member 1
1416242_at	0.0568472	0.00121	-3.72328	-0.90721	-0.204675	Klhl13	kelch-like 13
1444395_at	0.0575118	0.00122	3.71783	-0.91938	0.163939	Dixdc1	DIX domain containing 1
1434392_at	0.0575118	0.00122	-3.71758	-0.91995	-0.14574	Usp34	ubiquitin specific peptidase 34
1419080_at	0.057726	0.00123	3.7156	-0.92437	0.221683	Gdnf	glial cell line derived neurotrophic factor
1453402_at	0.057994	0.00124	-3.71324	-0.92964	-0.292651	6430500C12Rik	RIKEN cDNA 6430500C12 gene
1429188_at	0.0580331	0.00124	-3.71253	-0.93123	-0.151736	Cox11	cytochrome c oxidase assembly protein 11
1426461_at	0.0580559	0.00124	-3.71194	-0.93256	-0.165674	Ugp2	UDP-glucose pyrophosphorylase 2
1449024_a_at	0.0581098	0.00125	3.71056	-0.93563	0.157172	Hexa	hexosaminidase A
1451908_a_at	0.0581098	0.00125	-3.71038	-0.93603	-0.165837	Sec14l1	SEC14-like lipid binding 1
1456634_at	0.0581098	0.00125	-3.71026	-0.93631	-0.344116	Soga1	suppressor of glucose, autophagy associated 1
1428946_at	0.0582434	0.00125	3.70855	-0.94012	0.208655	Uba6	ubiquitin-like modifier activating enzyme 6
1418743_a_at	0.0582434	0.00125	3.70844	-0.94036	0.216182	Tesc	tescalcin
1451219_at	0.058325	0.00125	3.70743	-0.94262	0.244512	Ormdl1	ORM1-like 1 (S. cerevisiae)
1417222_a_at	0.0583266	0.00126	-3.7066	-0.94446	-0.24027	Tmem123	transmembrane protein 123
1454825_at	0.0583266	0.00126	-3.70596	-0.94591	-0.180329	Vps51	VPS51 GARP complex subunit
1453419_at	0.0583266	0.00126	3.70595	-0.94593	0.173751	Mras	muscle and microspikes RAS
1434329_s_at	0.0583266	0.00126	3.70571	-0.94647	0.274071	Adipor2	adiponectin receptor 2
1432320_at	0.0583808	0.00126	-3.70464	-0.94886	-0.225876	9430065F17Rik	RIKEN cDNA 9430065F17 gene
1417644_at	0.0583808	0.00126	-3.70447	-0.94923	-0.202096	Sspn	sarcospan
1447934_at	0.0584098	0.00127	-3.70383	-0.95065	-0.201454	Tigar	Trp53 induced glycolysis repulatory phosphatase
1428544_at	0.0584098	0.00127	-3.70306	-0.95238	-0.184066	Tmem248	transmembrane protein 248
1434778_at	0.0584098	0.00127	-3.70299	-0.95255	-0.194366	Wapl	WAPL cohesin release factor
1424369_at	0.05842	0.00127	-3.70233	-0.954	-0.179329	Psmf1	proteasome (prosome, macropain) inhibitor subunit 1
1435188_at	0.05842	0.00127	-3.70206	-0.9546	-0.216514	Ciart	circadian associated repressor of transcription
1420332_x_at	0.0585878	0.00128	3.70005	-0.95911	0.179357	Lce1d	late cornified envelope 1D
1460455_at	0.0585878	0.00128	-3.70002	-0.95916	-0.285338	Ubr3	ubiquitin protein ligase E3 component n-recognin 3
1451275_at	0.0587992	0.00128	-3.6977	-0.96435	-0.17722	Uhrf1bp1l	UHRF1 (ICBP90) binding protein 1-like
1418978_at	0.0587992	0.00129	3.69693	-0.96606	0.160861	Sap30bp	SAP30 binding protein
1455249_at	0.0587992	0.00129	-3.69643	-0.96717	-0.1441	Slc36a4	solute carrier family 36 (proton/amino acid symporter), member 4
1422153_a_at	0.0587992	0.00129	-3.69629	-0.96749	-0.271092	Asb11	ankyrin repeat and SOCS box-containing 11
1422208_a_at	0.0587992	0.00129	-3.6961	-0.96791	-0.140739	Gnb5	guanine nucleotide binding protein (G protein), beta 5
1433698_a_at	0.0587992	0.00129	-3.69562	-0.96899	-0.154955	Txnl4a	thioredoxin-like 4A
1438178_x_at	0.0587992	0.00129	-3.69557	-0.9691	-0.257718	Atad3a	ATPase family, AAA domain containing 3A
1425052_at	0.0590155	0.0013	-3.69362	-0.97345	-0.15728	Isoc1	isochorismatase domain containing 1
1416667_at	0.0592494	0.0013	3.69156	-0.97806	0.140099	Ebp	phenylalkylamine Ca2+ antagonist (emopamil) binding protein
1457298_at	0.0593799	0.00131	3.69022	-0.98103	0.197348	Pou6f2	POU domain, class 6, transcription factor 2
1422647_at	0.0594211	0.00131	-3.6891	-0.98353	-0.182088	Ring1	ring finger protein 1
1416721_s_at	0.0594211	0.00131	-3.68873	-0.98436	-0.233258	Srsf6	serine/arginine-rich splicing factor 6
1428684_at	0.0594211	0.00131	-3.68812	-0.98574	-0.213015	Tamm41	TAM41 mitochondrial translocator assembly and maintenance homolog
1444394_at	0.0594211	0.00131	3.68785	-0.98633	0.269246	Acad9	acyl-Coenzyme A dehydrogenase family, member 9
1431419_at	0.0594211	0.00132	3.68779	-0.98646	0.190239	Prelid1	PRELI domain containing 1
1435734_x_at	0.0594211	0.00132	-3.6874	-0.98734	-0.22099	Dus1l	dihydrouridine synthase 1-like (S. cerevisiae)
1459805_x_at	0.0594211	0.00132	-3.68701	-0.9882	-0.173745	Dus3l	dihydrouridine synthase 3-like (S. cerevisiae)
1451483_s_at	0.0594837	0.00132	-3.68553	-0.9915	-0.199504	Ccsap	centriole, cilia and spindle associated protein
1435120_at	0.0594837	0.00132	-3.68499	-0.99271	-0.238814	Cdh11	cadherin 11
1429129_at	0.0594837	0.00132	-3.68487	-0.99297	-0.31831	Lrrcc1	leucine rich repeat and coiled-coil domain containing 1
1449968_s_at	0.0594837	0.00132	-3.68472	-0.99332	-0.220257	Acot10///Acot9	acyl-CoA thioesterase 10///acyl-CoA thioesterase 9
1437864_at	0.0594837	0.00133	3.68437	-0.99409	0.20837	Adipor2	adiponectin receptor 2
1454044_a_at	0.0594837	0.00133	-3.68408	-0.99473	-0.182585	Pex3	peroxisomal biogenesis factor 3
1424700_at	0.059624	0.00133	3.68269	-0.99785	0.182109	Tmem38b	transmembrane protein 38B
1452161_at	0.0596906	0.00134	3.68151	-1.00047	0.22486	Tiparp	TCDD-inducible poly(ADP-ribose) polymerase
1435831_at	0.0596906	0.00134	-3.68119	-1.00118	-0.236563	Upk1b	uroplakin 1B
1428954_at	0.0596906	0.00134	3.68099	-1.00164	0.172845	Slc9a3r2	solute carrier family 9 (sodium/hydrogen exchanger), member 3 regulator 2
1430247_at	0.0596984	0.00134	3.68052	-1.00269	0.275591	Daam2	dishevelled associated activator of morphogenesis 2
1428568_at	0.0597192	0.00134	-3.67984	-1.0042	-0.183759	B230217C12Rik	RIKEN cDNA B230217C12 gene
1422966_a_at	0.0597192	0.00134	-3.67955	-1.00484	-0.292322	Tfrc	transferrin receptor
1428384_at	0.0600486	0.00135	3.67669	-1.01121	0.224681	Lurap1l	leucine rich adaptor protein 1-like
1451464_at	0.0600486	0.00135	3.67644	-1.01178	0.219863	Mfap3	microfibrillar-associated protein 3
1437746_at	0.0600584	0.00135	-3.67596	-1.01285	-0.291342	Lrrtm1	leucine rich repeat transmembrane neuronal 1
1419179_at	0.0602736	0.00136	3.67406	-1.01708	0.212349	Txnl4a	thioredoxin-like 4A
1416675_s_at	0.0605137	0.00137	-3.672	-1.02169	-0.226317	Plcd1	phospholipase C, delta 1
1418260_at	0.0607248	0.00137	-3.67014	-1.02583	-0.216057	Hunk	hormonally upregulated Neu-associated kinase
1453976_at	0.0607361	0.00137	-3.66965	-1.02691	-0.33364	4432414F05Rik	RIKEN cDNA 4432414F05 gene
1450112_a_at	0.0608065	0.00138	-3.66832	-1.02989	-0.232695	Gas2	growth arrest specific 2
1447831_s_at	0.0608065	0.00138	-3.66763	-1.03141	-0.231818	Mtmr7	myotubularin related protein 7
1452238_at	0.0608065	0.00138	3.66754	-1.03162	0.172727	Agfg1	ArfGAP with FG repeats 1
1436082_at	0.0613127	0.00139	-3.66348	-1.04067	-0.351987	Myef2	myelin basic protein expression factor 2, repressor
1456012_x_at	0.0613127	0.00139	-3.66323	-1.04122	-0.196334	Rnaset2a///Rnaset2b	ribonuclease T2A///ribonuclease T2B
1415834_at	0.0613127	0.0014	3.66287	-1.04204	0.236235	Dusp6	dual specificity phosphatase 6
1449530_at	0.0613471	0.0014	-3.66223	-1.04346	-0.21648	Trps1	trichorhinophalangeal syndrome I (human)
1444673_at	0.0614259	0.0014	-3.66129	-1.04555	-0.317123	Gm17739	predicted gene, 17739
1439947_at	0.0615072	0.00141	-3.65891	-1.05085	-0.223929	Cyp11a1	cytochrome P450, family 11, subfamily a, polypeptide 1
1417919_at	0.0615072	0.00141	-3.65855	-1.05165	-0.147277	Ppp1r7	protein phosphatase 1, regulatory (inhibitor) subunit 7
1447987_at	0.0615072	0.00141	3.65848	-1.05181	0.220172	Letm2	leucine zipper-EF-hand containing transmembrane protein 2
1426600_at	0.0615072	0.00141	3.6581	-1.05265	0.204058	Slc2a1	solute carrier family 2 (facilitated glucose transporter), member 1
1424790_at	0.0615072	0.00141	3.65743	-1.05414	0.193592	Slc25a42	solute carrier family 25, member 42
1449600_at	0.0615072	0.00142	3.65699	-1.05513	0.229546	Gm3716	predicted gene 3716
1423903_at	0.0615072	0.00142	3.65675	-1.05567	0.202766	Pvr	poliovirus receptor
1440359_at	0.0615072	0.00142	-3.65671	-1.05576	-0.180748	Fam110b	family with sequence similarity 110, member B
1451047_at	0.0616832	0.00142	-3.65512	-1.0593	-0.238374	Itm2a	integral membrane protein 2A
1441991_at	0.0618898	0.00143	3.65283	-1.06441	0.176247	Prss53	protease, serine 53
1418250_at	0.0618898	0.00143	3.6523	-1.06559	0.322824	Arl4d	ADP-ribosylation factor-like 4D
1429625_at	0.0618898	0.00143	-3.65212	-1.06597	-0.153135	2900054C01Rik	RIKEN cDNA 2900054C01 gene
1425686_at	0.0618995	0.00143	3.65166	-1.067	0.168246	Cflar	CASP8 and FADD-like apoptosis regulator
1434453_at	0.0622262	0.00144	-3.64907	-1.07278	-0.157796	Polr3a	polymerase (RNA) III (DNA directed) polypeptide A
1418070_at	0.0622309	0.00144	-3.64864	-1.07373	-0.321723	Cdyl	chromodomain protein, Y chromosome-like
1452924_at	0.0622354	0.00145	3.64802	-1.0751	0.204327	Fam83d	family with sequence similarity 83, member D
1428470_at	0.0622354	0.00145	-3.64773	-1.07576	-0.192616	Exoc2	exocyst complex component 2
1440691_at	0.0622354	0.00145	-3.64741	-1.07646	-0.25836	Cyp2j6	cytochrome P450, family 2, subfamily j, polypeptide 6
1419516_at	0.0622464	0.00145	-3.64627	-1.079	-0.182223	Fam50a	family with sequence similarity 50, member A
1425422_a_at	0.0622464	0.00145	-3.64617	-1.07923	-0.185586	Parn	poly(A)-specific ribonuclease (deadenylation nuclease)
1436916_at	0.0622464	0.00145	-3.64591	-1.07981	-0.29348	Tmem108	transmembrane protein 108
1437128_a_at	0.0622464	0.00145	-3.64576	-1.08015	-0.218319	Zfp945	zinc finger protein 945
1443724_at	0.062253	0.00146	3.6452	-1.08138	0.160406	Jph3	junctophilin 3
1431863_at	0.062253	0.00146	3.64492	-1.08201	0.177246	4931430N09Rik	RIKEN cDNA 4931430N09 gene
1448663_s_at	0.0622538	0.00146	-3.64446	-1.08303	-0.186482	Mvd	mevalonate (diphospho) decarboxylase
1436164_at	0.0622538	0.00146	-3.64413	-1.08377	-0.160763	Slc30a1	solute carrier family 30 (zinc transporter), member 1
1417194_at	0.0623045	0.00146	3.6434	-1.08541	0.217919	Sod2	superoxide dismutase 2, mitochondrial
1420666_at	0.0623567	0.00147	3.64259	-1.08719	0.271651	Doc2b	double C2, beta
1432340_at	0.0623567	0.00147	3.64189	-1.08876	0.201763	1700121N20Rik	RIKEN cDNA 1700121N20 gene
1460007_at	0.0623567	0.00147	3.64159	-1.08942	0.22067	Thyn1	thymocyte nuclear protein 1
1455535_at	0.0623567	0.00147	-3.64147	-1.08968	-0.209807	Sox5	SRY (sex determining region Y)-box 5
1418887_a_at	0.0623993	0.00147	-3.64026	-1.09238	-0.166895	Fam104a	family with sequence similarity 104, member A
1424285_s_at	0.0623993	0.00148	-3.63993	-1.09312	-0.154133	Arl6ip4	ADP-ribosylation factor-like 6 interacting protein 4
1452914_at	0.0623993	0.00148	-3.63969	-1.09366	-0.202124	N4bp2l1	NEDD4 binding protein 2-like 1
1439281_at	0.0623993	0.00148	-3.63962	-1.0938	-0.299275	Slc26a8	solute carrier family 26, member 8
1434467_at	0.0624203	0.00148	-3.63909	-1.09498	-0.219122	Atcay	ataxia, cerebellar, Cayman type
1443215_at	0.0624963	0.00148	-3.63805	-1.09731	-0.189026	Rims2	regulating synaptic membrane exocytosis 2
1449342_at	0.0624963	0.00148	3.63781	-1.09785	0.179479	Hacd2	3-hydroxyacyl-CoA dehydratase 2
1425142_a_at	0.0626187	0.00149	-3.63625	-1.1013	-0.23269	Hnrnpd	heterogeneous nuclear ribonucleoprotein D
1424095_at	0.0626187	0.00149	-3.63621	-1.1014	-0.19394	Rtca	RNA 3'-terminal phosphate cyclase
1434143_at	0.062723	0.00149	-3.63513	-1.10381	-0.163861	Atmin	ATM interactor
1436824_x_at	0.0627291	0.00149	-3.6347	-1.10476	-0.263091	Rnf26	ring finger protein 26
1435772_at	0.0627472	0.0015	-3.63419	-1.10589	-0.201279	Kif21b	kinesin family member 21B
1448892_at	0.0627545	0.0015	-3.63375	-1.10686	-0.192316	Dock7	dedicator of cytokinesis 7
1417092_at	0.0628102	0.0015	-3.63272	-1.10916	-0.257094	Pth1r	parathyroid hormone 1 receptor
1436050_x_at	0.0628102	0.0015	-3.63261	-1.10941	-0.171907	Hes6	hairy and enhancer of split 6
1444397_at	0.0629457	0.00151	3.63132	-1.11227	0.24474	Spef1	sperm flagellar 1
1423306_at	0.0629562	0.00151	3.63087	-1.11328	0.282294	Smim3	small integral membrane protein 3
1430575_a_at	0.0630357	0.00151	-3.62921	-1.11697	-0.335078	Tpp2	tripeptidyl peptidase II
1443794_x_at	0.0630357	0.00152	-3.62814	-1.11936	-0.356146	Noc4l	NOC4 like
1436449_at	0.0630357	0.00152	-3.62768	-1.12039	-0.34919	Pcdh11x	protocadherin 11 X-linked
1434690_at	0.0630357	0.00152	-3.62703	-1.12183	-0.151299	Lclat1	lysocardiolipin acyltransferase 1
1432472_a_at	0.0630357	0.00152	-3.62697	-1.12196	-0.238174	Mccc2	methylcrotonoyl-Coenzyme A carboxylase 2 (beta)
1431201_at	0.0630357	0.00152	3.6268	-1.12232	0.227844	Slc25a27	solute carrier family 25, member 27
1436948_a_at	0.0630357	0.00153	-3.6259	-1.12433	-0.264617	Tmem255a	transmembrane protein 255A
1429834_a_at	0.0630357	0.00153	-3.62586	-1.12441	-0.242028	Vps51	VPS51 GARP complex subunit
1448651_at	0.0630357	0.00153	3.62572	-1.12474	0.23977	Nudt5	nudix (nucleoside diphosphate linked moiety X)-type motif 5
1436448_a_at	0.0630357	0.00153	-3.62567	-1.12484	-0.16645	Ptgs1	prostaglandin-endoperoxide synthase 1
1452895_at	0.0630357	0.00153	-3.62544	-1.12535	-0.136471	Fbxo45	F-box protein 45
1428410_at	0.0630357	0.00153	-3.62535	-1.12555	-0.222758	Naa50	N(alpha)-acetyltransferase 50, NatE catalytic subunit
1424075_at	0.0631655	0.00153	-3.62376	-1.12909	-0.195019	9430016H08Rik	RIKEN cDNA 9430016H08 gene
1449533_at	0.0631655	0.00153	3.62373	-1.12916	0.237174	Tmem100	transmembrane protein 100
1444163_at	0.0633809	0.00154	3.6217	-1.13367	0.184956	Nek5	NIMA (never in mitosis gene a)-related expressed kinase 5
1430743_at	0.0633809	0.00154	3.62155	-1.13401	0.186078	AW046200	expressed sequence AW046200
1448174_at	0.0637661	0.00155	-3.61864	-1.14047	-0.152859	Cul1	cullin 1
1422313_a_at	0.0637906	0.00155	3.6181	-1.14168	0.167556	Igfbp5	insulin-like growth factor binding protein 5
1434691_at	0.0639667	0.00156	-3.61657	-1.14508	-0.177179	Scaf11	SR-related CTD-associated factor 11
1420081_s_at	0.064015	0.00156	3.61588	-1.14662	0.230299	Knstrn	kinetochore-localized astrin/SPAG5 binding
1435774_at	0.0640929	0.00157	-3.61499	-1.14859	-0.212205	LOC106740///Phf10	uncharacterized LOC106740///PHD finger protein 10
1455419_at	0.0641841	0.00157	-3.61344	-1.15203	-0.248407	D630045J12Rik	RIKEN cDNA D630045J12 gene
1424880_at	0.0641841	0.00157	3.61276	-1.15355	0.195077	Trib1	tribbles pseudokinase 1
1447894_x_at	0.0641841	0.00157	-3.61269	-1.1537	-0.189619	Vps52	VPS52 GARP complex subunit
1451222_at	0.0641841	0.00158	-3.61237	-1.15441	-0.151584	Btf3l4	basic transcription factor 3-like 4
1419500_at	0.0641841	0.00158	3.61235	-1.15446	0.199081	Pabpc2	poly(A) binding protein, cytoplasmic 2
1420124_s_at	0.0641841	0.00158	-3.6118	-1.15568	-0.163326	Tcta	T cell leukemia translocation altered gene
1430413_at	0.0641841	0.00158	3.61176	-1.15578	0.169338	Tmem29	transmembrane protein 29
1441369_at	0.0642201	0.00158	-3.61085	-1.15778	-0.206918	C030017B01Rik	RIKEN cDNA C030017B01 gene
1429372_at	0.0642201	0.00158	3.61077	-1.15797	0.264029	Sox11	SRY (sex determining region Y)-box 11
1452418_at	0.0642246	0.00159	3.60981	-1.16011	0.154425	Gm20186	predicted gene, 20186
1442195_at	0.0642246	0.00159	3.60957	-1.16063	0.199314	BB283564	expressed sequence BB283564
1427928_s_at	0.0642246	0.00159	3.60949	-1.1608	0.145341	Pigu	phosphatidylinositol glycan anchor biosynthesis, class U
1453221_at	0.0642246	0.00159	-3.60919	-1.16148	-0.168507	Gopc	golgi associated PDZ and coiled-coil motif containing
1436402_at	0.0642246	0.00159	3.60851	-1.16298	0.252176	LOC102633979///Dohh	uncharacterized LOC102633979///deoxyhypusine hydroxylase/monooxygenase
1455436_at	0.0642246	0.00159	-3.60849	-1.16303	-0.182	Diras2	DIRAS family, GTP-binding RAS-like 2
1449542_at	0.064232	0.00159	3.60807	-1.16397	0.157086	Pbx1	pre B cell leukemia homeobox 1
1416432_at	0.0643141	0.0016	3.60716	-1.16598	0.271816	Pfkfb3	6-phosphofructo-2-kinase/fructose-2,6-biphosphatase 3
1456146_at	0.0644116	0.0016	-3.60596	-1.16866	-0.204913	Osbpl10	oxysterol binding protein-like 10
1441905_x_at	0.0644116	0.0016	-3.60579	-1.16904	-0.191862	Snurf///Snrpn	SNRPN upstream reading frame///small nuclear ribonucleoprotein N
1417520_at	0.0646081	0.00161	-3.60319	-1.17481	-0.269002	Nfe2l3	nuclear factor, erythroid derived 2, like 3
1428279_a_at	0.0646081	0.00161	3.60304	-1.17515	0.241463	Atxn7l1	ataxin 7-like 1
1435578_s_at	0.0646081	0.00161	-3.60262	-1.17607	-0.18682	Dab1	disabled 1
1416222_at	0.0646081	0.00161	-3.60229	-1.17681	-0.157186	Nsdhl	NAD(P) dependent steroid dehydrogenase-like
1437565_a_at	0.0646081	0.00162	-3.60191	-1.17765	-0.265743	Gnl2	guanine nucleotide binding protein-like 2 (nucleolar)
1440200_at	0.0646081	0.00162	-3.60161	-1.17831	-0.272477	Fam184b	family with sequence similarity 184, member B
1448269_a_at	0.0646081	0.00162	-3.60117	-1.17929	-0.187269	Klhl13	kelch-like 13
1421911_at	0.0646081	0.00162	3.60094	-1.17981	0.214639	Stat2	signal transducer and activator of transcription 2
1437395_at	0.0646081	0.00162	-3.60033	-1.18116	-0.224599	Zcchc11	zinc finger, CCHC domain containing 11
1433554_at	0.0646081	0.00162	-3.60032	-1.18118	-0.144734	Ccz1	CCZ1 vacuolar protein trafficking and biogenesis associated
1429151_at	0.0646081	0.00162	-3.60026	-1.18132	-0.16675	Dcaf7	DDB1 and CUL4 associated factor 7
1434709_at	0.0646081	0.00162	-3.60007	-1.18174	-0.159409	Nrcam	neuronal cell adhesion molecule
1437146_x_at	0.0648837	0.00163	-3.59792	-1.18651	-0.277651	Coro7	coronin 7
1455040_s_at	0.0649285	0.00163	3.59727	-1.18796	0.203989	Nhsl2	NHS-like 2
1436293_x_at	0.0649546	0.00164	-3.59655	-1.18956	-0.192497	Ildr2	immunoglobulin-like domain containing receptor 2
1418788_at	0.0649546	0.00164	-3.59636	-1.18997	-0.258354	Tek	endothelial-specific receptor tyrosine kinase
1419725_at	0.0652324	0.00165	3.59421	-1.19474	0.174428	Slc26a4	solute carrier family 26, member 4
1437742_at	0.0652895	0.00165	3.59348	-1.19637	0.156332	Rab21	RAB21, member RAS oncogene family
1423962_at	0.0654634	0.00165	-3.592	-1.19965	-0.183781	Wdr26	WD repeat domain 26
1425530_a_at	0.0655383	0.00166	-3.59094	-1.20201	-0.278221	Stx3	syntaxin 3
1455486_at	0.0655383	0.00166	-3.59051	-1.20297	-0.256403	Pias1	protein inhibitor of activated STAT 1
1431231_at	0.0655383	0.00166	3.59043	-1.20314	0.2331	Hist1h3f	histone cluster 1, H3f
1447839_x_at	0.0657583	0.00167	3.5883	-1.20787	0.185991	Adm	adrenomedullin
1451334_at	0.0659513	0.00168	-3.58671	-1.2114	-0.165126	Fam58b	family with sequence similarity 58, member B
1418592_at	0.0660528	0.00168	3.58548	-1.21412	0.149075	Dnaja4	DnaJ heat shock protein family (Hsp40) member A4
1417929_at	0.0660528	0.00168	-3.58534	-1.21444	-0.267236	Slc7a8	solute carrier family 7 (cationic amino acid transporter, y+ system), member 8
1416013_at	0.0661733	0.00169	-3.58421	-1.21694	-0.166225	Pld3	phospholipase D family, member 3
1441317_x_at	0.0662363	0.00169	-3.58341	-1.21872	-0.198817	Jakmip1	janus kinase and microtubule interacting protein 1
1415913_at	0.0662363	0.00169	3.58258	-1.22056	0.223872	LOC102642137///Gm15483///Rps13-ps4///Rps13	40S ribosomal protein S13///predicted gene 15483///ribosomal protein S13, pseudogene 4///ribosomal protein S13
1438559_x_at	0.0662363	0.00169	-3.58253	-1.22067	-0.418263	Slc44a2	solute carrier family 44, member 2
1426985_s_at	0.0662363	0.00169	-3.58236	-1.22104	-0.238916	Fam76b	family with sequence similarity 76, member B
1428011_a_at	0.0667022	0.00171	-3.57907	-1.22834	-0.256586	Erbb2ip	Erbb2 interacting protein
1454197_a_at	0.0669587	0.00172	-3.57689	-1.23318	-0.300161	Ccdc86	coiled-coil domain containing 86
1440270_at	0.0669587	0.00172	-3.57674	-1.2335	-0.236371	Fgf12	fibroblast growth factor 12
1457005_at	0.0671366	0.00172	3.57527	-1.23676	0.164644	Mtfmt	mitochondrial methionyl-tRNA formyltransferase
1447537_at	0.0673595	0.00173	3.57353	-1.24064	0.355685	1500032P08Rik///Cfp	RIKEN cDNA 1500032P08 gene///complement factor properdin
1416246_a_at	0.067406	0.00173	-3.57258	-1.24275	-0.194103	Coro1a	coronin, actin binding protein 1A
1427831_s_at	0.067406	0.00173	-3.57252	-1.24287	-0.261951	Zfp260	zinc finger protein 260
1422754_at	0.0675934	0.00174	-3.57095	-1.24636	-0.241093	Tmod1	tropomodulin 1
1434793_at	0.0675934	0.00174	3.57064	-1.24704	0.30676	Wdr78	WD repeat domain 78
1427002_s_at	0.0676557	0.00174	-3.56989	-1.2487	-0.186967	Arsg	arylsulfatase G
1434936_at	0.0677839	0.00175	-3.56874	-1.25125	-0.136513	Hirip3	HIRA interacting protein 3
1424755_at	0.0680313	0.00176	3.56686	-1.25542	0.236006	Hip1	huntingtin interacting protein 1
1426696_at	0.0681307	0.00176	3.56556	-1.25829	0.149372	Lrpap1	low density lipoprotein receptor-related protein associated protein 1
1421475_at	0.0681307	0.00176	3.56553	-1.25836	0.188025	Ms4a2	membrane-spanning 4-domains, subfamily A, member 2
1434128_a_at	0.0681694	0.00177	-3.56453	-1.26058	-0.220349	Zfp574	zinc finger protein 574
1432057_a_at	0.0681694	0.00177	3.56439	-1.26088	0.197777	Prdm5	PR domain containing 5
1439485_at	0.0681694	0.00177	-3.56422	-1.26126	-0.174201	Zfp608	zinc finger protein 608
1417003_at	0.0684654	0.00178	3.56205	-1.26607	0.212757	0610012G03Rik	RIKEN cDNA 0610012G03 gene
1428434_at	0.0685972	0.00178	-3.56089	-1.26864	-0.182355	Zcchc12	zinc finger, CCHC domain containing 12
1437874_s_at	0.0689045	0.00179	-3.55839	-1.27417	-0.204384	Hexb	hexosaminidase B
1431569_a_at	0.0689242	0.0018	3.55783	-1.27542	0.172728	Lypd1	Ly6/Plaur domain containing 1
1438610_a_at	0.0690519	0.0018	-3.55616	-1.27912	-0.204912	Cryz	crystallin, zeta
1434802_s_at	0.0690519	0.00181	-3.55538	-1.28084	-0.328808	Ntf3	neurotrophin 3
1440234_at	0.0690519	0.00181	-3.55521	-1.28124	-0.206099	Lyrm9	LYR motif containing 9
1459723_at	0.0690519	0.00181	-3.55512	-1.28143	-0.21744	Zdhhc22	zinc finger, DHHC-type containing 22
1423042_at	0.0690519	0.00181	-3.55481	-1.28211	-0.180191	Ddx3x	DEAD/H (Asp-Glu-Ala-Asp/His) box polypeptide 3, X-linked
1431361_at	0.0690519	0.00181	3.55384	-1.28426	0.176073	Prcp	prolylcarboxypeptidase (angiotensinase C)
1452594_at	0.0690519	0.00182	3.55317	-1.28575	0.203692	Dusp11	dual specificity phosphatase 11 (RNA/RNP complex 1-interacting)
1421830_at	0.0690519	0.00182	3.55315	-1.28579	0.184463	Ak4	adenylate kinase 4
1450839_at	0.0690519	0.00182	-3.55315	-1.2858	-0.237888	Nrep	neuronal regeneration related protein
1434546_at	0.0690519	0.00182	3.55281	-1.28655	0.149667	Smg5	Smg-5 homolog, nonsense mediated mRNA decay factor (C. elegans)
1426377_at	0.0691662	0.00182	-3.55168	-1.28906	-0.182097	Zfp281	zinc finger protein 281
1436947_a_at	0.0691662	0.00182	-3.55141	-1.28964	-0.156526	Txnl1	thioredoxin-like 1
1424503_at	0.0691939	0.00183	3.55089	-1.29079	0.181385	Rab22a	RAB22A, member RAS oncogene family
1437043_a_at	0.0692007	0.00183	-3.5505	-1.29166	-0.162146	Mvb12a	multivesicular body subunit 12A
1442601_at	0.069274	0.00183	3.54961	-1.29362	0.198127	Gmeb1	glucocorticoid modulatory element binding protein 1
1427979_at	0.069274	0.00183	3.54935	-1.29419	0.236183	Efcab14	EF-hand calcium binding domain 14
1419724_at	0.0695677	0.00184	3.54723	-1.29889	0.186084	Edar	ectodysplasin-A receptor
1428342_at	0.0698457	0.00185	-3.54521	-1.30336	-0.216826	Rcor3	REST corepressor 3
1422718_at	0.0700855	0.00186	3.54314	-1.30795	0.158923	Ap3s2	adaptor-related protein complex 3, sigma 2 subunit
1427236_a_at	0.0700855	0.00186	-3.54302	-1.30822	-0.20899	Kmt2e	lysine (K)-specific methyltransferase 2E
1416084_at	0.0700855	0.00186	-3.54254	-1.30927	-0.17458	Zfand5	zinc finger, AN1-type domain 5
1455868_a_at	0.0700855	0.00186	-3.54238	-1.30963	-0.162017	Tubgcp2	tubulin, gamma complex associated protein 2
1445672_at	0.0701442	0.00187	3.54168	-1.31118	0.151898	Gm35658	predicted gene, 35658
1449374_at	0.0703464	0.00187	-3.54013	-1.31461	-0.209554	Pipox	pipecolic acid oxidase
1424824_at	0.0703481	0.00187	-3.53977	-1.31541	-0.338944	Slain1	SLAIN motif family, member 1
1415734_at	0.0709032	0.00189	-3.53613	-1.32346	-0.133134	Rab7	RAB7, member RAS oncogene family
1432287_a_at	0.0710153	0.0019	-3.53512	-1.32569	-0.196916	Sntg1	syntrophin, gamma 1
1434088_at	0.0710604	0.0019	-3.53451	-1.32705	-0.147219	Zkscan17	zinc finger with KRAB and SCAN domains 17
1419664_at	0.0711383	0.0019	-3.53358	-1.32911	-0.265003	Srr	serine racemase
1459020_at	0.0711383	0.00191	-3.53303	-1.33031	-0.197995	Amigo1	adhesion molecule with Ig like domain 1
1428871_at	0.0711383	0.00191	3.53246	-1.33159	0.161405	Msl1	male-specific lethal 1 homolog (Drosophila)
1428917_at	0.0711383	0.00191	-3.53196	-1.33269	-0.183621	Stx17	syntaxin 17
1422635_at	0.0711383	0.00191	-3.53186	-1.3329	-0.254374	Ache	acetylcholinesterase
1428956_at	0.0711383	0.00191	3.53165	-1.33336	0.146531	Tmem177	transmembrane protein 177
1439249_at	0.0711383	0.00191	-3.53163	-1.33343	-0.272652	Wac	WW domain containing adaptor with coiled-coil
1428973_s_at	0.071323	0.00192	-3.52985	-1.33736	-0.167793	Tctex1d2	Tctex1 domain containing 2
1438400_at	0.071323	0.00192	3.52975	-1.33758	0.174471	Kansl3	KAT8 regulatory NSL complex subunit 3
1436833_x_at	0.071323	0.00192	-3.5295	-1.33812	-0.20052	Ttll1	tubulin tyrosine ligase-like 1
1422980_a_at	0.0713479	0.00192	3.52901	-1.3392	0.180809	Bet1l	Bet1 golgi vesicular membrane trafficking protein like
1437147_at	0.0713579	0.00193	-3.52861	-1.34009	-0.279839	Gabrg2	gamma-aminobutyric acid (GABA) A receptor, subunit gamma 2
1436265_at	0.0715206	0.00193	-3.52731	-1.34296	-0.195928	Gm10419	predicted gene 10419
1456512_at	0.071626	0.00194	-3.52612	-1.34559	-0.271263	Pdzrn4	PDZ domain containing RING finger 4
1428620_at	0.071626	0.00194	3.52601	-1.34584	0.156441	Ensa	endosulfine alpha
1449731_s_at	0.0718175	0.00195	3.52381	-1.35069	0.335116	Nfkbia	nuclear factor of kappa light polypeptide gene enhancer in B cells inhibitor, alpha
1441894_s_at	0.0718175	0.00195	-3.52354	-1.35129	-0.21295	Grasp	GRP1 (general receptor for phosphoinositides 1)-associated scaffold protein
1436200_at	0.0718175	0.00195	3.52324	-1.35196	0.163721	Lonrf3	LON peptidase N-terminal domain and ring finger 3
1423910_at	0.0718175	0.00195	3.52308	-1.35231	0.17167	Agap3	ArfGAP with GTPase domain, ankyrin repeat and PH domain 3
1429219_at	0.0718175	0.00195	-3.52289	-1.35275	-0.210821	Ikbip	IKBKB interacting protein
1418045_at	0.0718175	0.00195	-3.52249	-1.35361	-0.145844	Inpp1	inositol polyphosphate-1-phosphatase
1437490_x_at	0.0718314	0.00196	-3.52184	-1.35507	-0.239955	Uap1	UDP-N-acetylglucosamine pyrophosphorylase 1
1430393_at	0.0718314	0.00196	3.52173	-1.3553	0.263961	2510017J16Rik	RIKEN cDNA 2510017J16 gene
1436475_at	0.0720922	0.00197	-3.51972	-1.35974	-0.278852	Nr2f2	nuclear receptor subfamily 2, group F, member 2
1418071_s_at	0.0720922	0.00197	-3.51904	-1.36125	-0.181193	Cdyl	chromodomain protein, Y chromosome-like
1440484_at	0.0720922	0.00197	-3.51864	-1.36212	-0.286152	Unc5d	unc-5 netrin receptor D
1430558_at	0.0720922	0.00197	-3.51851	-1.36242	-0.200963	Zfp318	zinc finger protein 318
1453147_at	0.0722647	0.00198	3.51693	-1.3659	0.167289	Polr3e	polymerase (RNA) III (DNA directed) polypeptide E
1436999_at	0.0722647	0.00198	3.51625	-1.36742	0.193556	Pid1	phosphotyrosine interaction domain containing 1
1442708_at	0.0722647	0.00198	-3.51615	-1.36762	-0.237954	Gm32960	predicted gene, 32960
1432707_at	0.0723045	0.00199	3.51541	-1.36927	0.197996	Gm8096	3-phosphoglycerate dehydrogenase pseudogene
1444040_at	0.0723045	0.00199	-3.51487	-1.37046	-0.250476	Lair1	leukocyte-associated Ig-like receptor 1
1424988_at	0.0723045	0.00199	-3.51455	-1.37117	-0.175271	Mylip	myosin regulatory light chain interacting protein
1439422_a_at	0.0723045	0.00199	-3.51383	-1.37276	-0.255411	Fam132a	family with sequence similarity 132, member A
1418539_a_at	0.0723045	0.002	-3.51362	-1.37321	-0.224876	Ptpre	protein tyrosine phosphatase, receptor type, E
1420089_at	0.0723045	0.002	3.51326	-1.37401	0.207317	Nfkbia	nuclear factor of kappa light polypeptide gene enhancer in B cells inhibitor, alpha
1420803_at	0.0723045	0.002	3.51322	-1.3741	0.177416	Tex18	testis expressed gene 18
1436432_at	0.0723928	0.002	-3.51221	-1.37633	-0.273484	Fgf12	fibroblast growth factor 12
1460338_a_at	0.0723928	0.002	3.51182	-1.3772	0.159881	Crlf3	cytokine receptor-like factor 3
1455649_at	0.0723928	0.00201	-3.51147	-1.37796	-0.165851	Ttc9	tetratricopeptide repeat domain 9
1456653_a_at	0.0723928	0.00201	-3.51137	-1.37819	-0.225809	Mthfd1l	methylenetetrahydrofolate dehydrogenase (NADP+ dependent) 1-like
1417814_at	0.0725314	0.00201	3.51023	-1.3807	0.19637	Pla2g5	phospholipase A2, group V
1437716_x_at	0.0728295	0.00202	-3.50791	-1.38582	-0.214046	Kif22	kinesin family member 22
1438419_at	0.0728295	0.00202	-3.50752	-1.3867	-0.207008	Scaf8	SR-related CTD-associated factor 8
1438250_s_at	0.0728295	0.00203	-3.50728	-1.38723	-0.242772	Gm12372///Taf9	predicted gene 12372///TATA-box binding protein associated factor 9
1441781_at	0.0728295	0.00203	3.50717	-1.38745	0.189945	AI317158	expressed sequence AI317158
1434394_at	0.0728737	0.00203	3.50659	-1.38875	0.243142	N4bp2	NEDD4 binding protein 2
1437464_at	0.0729244	0.00203	-3.50556	-1.39102	-0.202066	Spata7	spermatogenesis associated 7
1426939_at	0.0729609	0.00204	-3.50442	-1.39355	-0.191217	Tsr2	TSR2 20S rRNA accumulation
1444018_at	0.0729609	0.00204	-3.50424	-1.39394	-0.215937	B930098A02Rik///Chic2	RIKEN cDNA B930098A02 gene///cysteine-rich hydrophobic domain 2
1435964_a_at	0.0729609	0.00204	-3.50409	-1.39427	-0.240177	Taok3	TAO kinase 3
1441777_at	0.0730087	0.00204	-3.50348	-1.39561	-0.156894	Emx1	empty spiracles homeobox 1
1452861_at	0.0730259	0.00205	-3.50305	-1.39656	-0.231776	2010300C02Rik	RIKEN cDNA 2010300C02 gene
1451177_at	0.0731818	0.00205	3.50182	-1.39927	0.148885	Dnajb4	DnaJ heat shock protein family (Hsp40) member B4
1419418_a_at	0.0734586	0.00206	-3.49991	-1.40349	-0.178002	Morc1	microrchidia 1
1437550_at	0.0736483	0.00207	-3.4985	-1.40661	-0.169296	Dhx36	DEAH (Asp-Glu-Ala-His) box polypeptide 36
1436808_x_at	0.0738161	0.00208	-3.49721	-1.40944	-0.20598	Mcm5	minichromosome maintenance complex component 5
1423828_at	0.0738402	0.00208	-3.49672	-1.41052	-0.199789	Fasn	fatty acid synthase
1432170_at	0.0738402	0.00208	3.49641	-1.41121	0.167541	Tsfm	Ts translation elongation factor, mitochondrial
1451449_at	0.0742068	0.00209	-3.49378	-1.41702	-0.157642	Erlec1	endoplasmic reticulum lectin 1
1426005_at	0.0742068	0.00209	3.49368	-1.41725	0.219896	Dmp1	dentin matrix protein 1
1455800_x_at	0.0742706	0.0021	-3.49264	-1.41952	-0.176071	Samm50	SAMM50 sorting and assembly machinery component
1416507_at	0.0742706	0.0021	-3.49238	-1.42011	-0.172858	Cnpy2	canopy FGF signaling regulator 2
1429040_at	0.0742706	0.0021	-3.49233	-1.42022	-0.1992	6820431F20Rik	cadherin 11 pseudogene
1426561_a_at	0.0743456	0.0021	3.49158	-1.42188	0.217443	Npnt	nephronectin
1448555_at	0.0743746	0.00211	-3.49108	-1.42297	-0.212808	Rpap3	RNA polymerase II associated protein 3
1424804_at	0.0743941	0.00211	-3.49007	-1.4252	-0.173494	Mios	missing oocyte, meiosis regulator, homolog (Drosophila)
1435918_at	0.0743941	0.00211	3.48992	-1.42553	0.245259	Fam107a	family with sequence similarity 107, member A
1428344_at	0.0743941	0.00211	-3.48949	-1.42649	-0.201089	Plpp6	phospholipid phosphatase 6
1448316_at	0.0743941	0.00211	3.48945	-1.42657	0.220572	Cmtm3	CKLF-like MARVEL transmembrane domain containing 3
1455079_at	0.0743941	0.00211	-3.48933	-1.42682	-0.146493	Dcun1d4	DCN1, defective in cullin neddylation 1, domain containing 4 (S. cerevisiae)
1425366_a_at	0.0744041	0.00212	3.48895	-1.42767	0.193805	Hus1	HUS1 checkpoint clamp component
1428810_at	0.0746249	0.00212	3.48738	-1.43113	0.204318	2700097O09Rik	RIKEN cDNA 2700097O09 gene
1437168_at	0.0748351	0.00213	-3.48587	-1.43445	-0.315462	Srsf12	serine/arginine-rich splicing factor 12
1434718_at	0.074985	0.00214	-3.48471	-1.43702	-0.135242	Cul3	cullin 3
1420542_at	0.0753076	0.00215	3.48258	-1.44172	0.25632	Dnajc28	DnaJ heat shock protein family (Hsp40) member C28
1417049_at	0.0753744	0.00215	3.48179	-1.44346	0.165653	Rhd	Rh blood group, D antigen
1442672_at	0.0753744	0.00215	3.48153	-1.44403	0.172008	0610040F04Rik	RIKEN cDNA 0610040F04 gene
1417770_s_at	0.0753744	0.00216	-3.48123	-1.44469	-0.227007	Psmc6	proteasome (prosome, macropain) 26S subunit, ATPase, 6
1439450_x_at	0.075473	0.00216	3.48036	-1.44662	0.259573	A230046K03Rik	RIKEN cDNA A230046K03 gene
1424433_at	0.0756751	0.00217	3.47867	-1.45032	0.143525	Msrb2	methionine sulfoxide reductase B2
1437009_a_at	0.0756751	0.00217	-3.47858	-1.45052	-0.210032	Rnf115	ring finger protein 115
1440496_at	0.0758977	0.00218	3.47703	-1.45395	0.249839	Samm50	SAMM50 sorting and assembly machinery component
1429594_at	0.0759649	0.00218	3.47629	-1.45558	0.186695	Slc38a2	solute carrier family 38, member 2
1454340_at	0.0759649	0.00218	3.47601	-1.4562	0.194947	9530025H10Rik	RIKEN cDNA 9530025H10 gene
1423703_at	0.075995	0.00219	-3.47547	-1.45739	-0.129363	Ppan	peter pan homolog (Drosophila)
1425115_at	0.075995	0.00219	-3.47519	-1.45799	-0.183229	Rbbp6	retinoblastoma binding protein 6
1427251_at	0.0760265	0.00219	3.4747	-1.45909	0.207601	Atp2a2	ATPase, Ca++ transporting, cardiac muscle, slow twitch 2
1431760_a_at	0.0763392	0.0022	-3.47233	-1.46431	-0.200352	Sdccag3	serologically defined colon cancer antigen 3
1416926_at	0.076393	0.00221	3.47171	-1.46567	0.221744	Trp53inp1	transformation related protein 53 inducible nuclear protein 1
1438312_s_at	0.0764796	0.00221	-3.47091	-1.46743	-0.211725	Ltbp3	latent transforming growth factor beta binding protein 3
1435885_s_at	0.0764853	0.00221	3.47056	-1.46821	0.149681	Itsn1	intersectin 1 (SH3 domain protein 1A)
1443688_at	0.0768125	0.00222	-3.46812	-1.47357	-0.159132	Zfp599	zinc finger protein 599
1451609_at	0.0768561	0.00223	3.46756	-1.4748	0.182161	Tspan33	tetraspanin 33
1451467_s_at	0.0772876	0.00224	3.46489	-1.48069	0.163961	Mtg2	mitochondrial ribosome associated GTPase 2
1420872_at	0.0772912	0.00224	-3.46455	-1.48144	-0.182098	Gucy1b3	guanylate cyclase 1, soluble, beta 3
1428216_s_at	0.0774015	0.00225	3.46363	-1.48346	0.226855	Tomm7	translocase of outer mitochondrial membrane 7 homolog (yeast)
1429680_at	0.0775794	0.00226	3.46216	-1.48669	0.207205	Tra2a	transformer 2 alpha homolog (Drosophila)
1424638_at	0.0775794	0.00226	3.46202	-1.487	0.234485	Cdkn1a	cyclin-dependent kinase inhibitor 1A (P21)
1459034_at	0.0777049	0.00226	3.46102	-1.4892	0.210587	Wdr19	WD repeat domain 19
1434630_at	0.0777477	0.00227	-3.46047	-1.49041	-0.204924	Ankrd28	ankyrin repeat domain 28
1452160_at	0.0779041	0.00227	3.45915	-1.49331	0.219773	Tiparp	TCDD-inducible poly(ADP-ribose) polymerase
1418147_at	0.0779041	0.00227	3.45899	-1.49367	0.160394	Tfap2c	transcription factor AP-2, gamma
1456574_at	0.0780487	0.00228	-3.45722	-1.49755	-0.252408	Zfp800	zinc finger protein 800
1453713_s_at	0.0780487	0.00228	-3.45705	-1.49793	-0.263193	Spaca6	sperm acrosome associated 6
1456233_at	0.0780487	0.00228	-3.45703	-1.49798	-0.244434	Tmem196	transmembrane protein 196
1446469_at	0.0780487	0.00229	3.4566	-1.49892	0.222475	Gm5082	predicted gene 5082
1437244_at	0.0780487	0.00229	-3.45635	-1.49947	-0.221385	Gas2l3	growth arrest-specific 2 like 3
1439107_a_at	0.0780487	0.00229	-3.4563	-1.49959	-0.29837	Kmt2e	lysine (K)-specific methyltransferase 2E
1428003_s_at	0.0780556	0.00229	-3.45594	-1.50038	-0.151553	Thtpa	thiamine triphosphatase
1438510_a_at	0.0781242	0.00229	-3.45526	-1.50189	-0.188624	Hars	histidyl-tRNA synthetase
1428557_a_at	0.0781299	0.0023	-3.45485	-1.50278	-0.282573	Osgepl1	O-sialoglycoprotein endopeptidase-like 1
1432063_at	0.0781299	0.0023	3.45459	-1.50335	0.202811	4833427F10Rik	RIKEN cDNA 4833427F10 gene
1447462_at	0.0783307	0.0023	3.45319	-1.50642	0.282069	D7Wsu130e	DNA segment, Chr 7, Wayne State University 130, expressed
1436353_at	0.0784134	0.00231	3.45243	-1.50809	0.20872	A230046K03Rik	RIKEN cDNA A230046K03 gene
1429436_at	0.0784326	0.00231	-3.45202	-1.50901	-0.308585	Prpf40a	pre-mRNA processing factor 40A
1424008_a_at	0.0784992	0.00232	-3.45106	-1.51112	-0.215638	Gm3470///Rbpms2	predicted gene 3470///RNA binding protein with multiple splicing 2
1439630_x_at	0.0784992	0.00232	-3.45103	-1.51119	-0.152735	Sbsn	suprabasin
1428085_at	0.0788386	0.00233	3.4489	-1.51587	0.162114	Ldah	lipid droplet associated hydrolase
1423687_a_at	0.0790781	0.00234	-3.44731	-1.51937	-0.235056	Man2c1	mannosidase, alpha, class 2C, member 1
1437380_x_at	0.0791082	0.00234	-3.44683	-1.52041	-0.197085	Pgd	phosphogluconate dehydrogenase
1444241_at	0.0791381	0.00234	-3.44613	-1.52196	-0.157919	Wac	WW domain containing adaptor with coiled-coil
1455033_at	0.0791381	0.00235	-3.4458	-1.52268	-0.180466	Fam102b	family with sequence similarity 102, member B
1451065_a_at	0.0791381	0.00235	-3.44546	-1.52343	-0.214739	Ddx39	DEAD (Asp-Glu-Ala-Asp) box polypeptide 39
1434465_x_at	0.0791381	0.00235	-3.44533	-1.52372	-0.211069	Vldlr	very low density lipoprotein receptor
1420477_at	0.0791381	0.00235	-3.4451	-1.52422	-0.164224	Nap1l1	nucleosome assembly protein 1-like 1
1448634_at	0.0791789	0.00235	3.44434	-1.52589	0.133247	Ralbp1	ralA binding protein 1
1426383_at	0.0791789	0.00235	-3.44426	-1.52608	-0.180487	Cry2	cryptochrome 2 (photolyase-like)
1416111_at	0.0792995	0.00236	-3.44313	-1.52856	-0.148744	Cd83	CD83 antigen
1446302_at	0.0792995	0.00236	3.44284	-1.52919	0.194963	Kyat1	kynurenine aminotransferase 1
1450393_a_at	0.0792995	0.00236	-3.44247	-1.52999	-0.183076	Adat3///Scamp4	adenosine deaminase, tRNA-specific 3///secretory carrier membrane protein 4
1418505_at	0.0792995	0.00236	-3.44236	-1.53024	-0.202945	Nudt4	nudix (nucleoside diphosphate linked moiety X)-type motif 4
1434884_at	0.0795184	0.00237	-3.44089	-1.53347	-0.211471	Mtdh	metadherin
1436670_x_at	0.0795193	0.00237	3.44057	-1.53417	0.219592	Nat8f4	N-acetyltransferase 8 (GCN5-related) family member 4
1417032_at	0.0797683	0.00238	3.43895	-1.53774	0.150591	Ube2g2	ubiquitin-conjugating enzyme E2G 2
1418254_at	0.0798684	0.00239	3.43811	-1.53959	0.162696	Apip	APAF1 interacting protein
1453885_at	0.0801105	0.0024	3.43621	-1.54375	0.157894	Slc24a2	solute carrier family 24 (sodium/potassium/calcium exchanger), member 2
1452870_at	0.0801683	0.0024	3.4356	-1.5451	0.192167	Apaf1	apoptotic peptidase activating factor 1
1435478_at	0.0802128	0.00241	-3.43505	-1.5463	-0.140297	Wdr26	WD repeat domain 26
1460240_a_at	0.0803683	0.00241	3.43382	-1.54901	0.150296	Hnrnpc	heterogeneous nuclear ribonucleoprotein C
1434828_at	0.0803683	0.00241	-3.43362	-1.54946	-0.132686	Fam102b	family with sequence similarity 102, member B
1443883_at	0.080445	0.00242	-3.4329	-1.55102	-0.219271	Sys1	SYS1 Golgi-localized integral membrane protein homolog (S. cerevisiae)
1452159_at	0.0805631	0.00243	-3.43178	-1.55348	-0.134113	Apmap	adipocyte plasma membrane associated protein
1449459_s_at	0.0805631	0.00243	-3.43167	-1.55374	-0.286336	Asb13	ankyrin repeat and SOCS box-containing 13
1438506_s_at	0.0807587	0.00244	-3.43003	-1.55734	-0.285221	Abi1	abl-interactor 1
1432157_at	0.0809433	0.00244	3.42876	-1.56013	0.166819	4930515G13Rik	RIKEN cDNA 4930515G13 gene
1442321_at	0.0811956	0.00246	3.42642	-1.56526	0.164941	Commd2	COMM domain containing 2
1426455_at	0.0811956	0.00246	-3.42633	-1.56546	-0.210677	Cwc27	CWC27 spliceosome-associated protein
1429717_at	0.0811956	0.00246	3.42621	-1.56571	0.208445	Ipo11	importin 11
1435418_at	0.0812308	0.00246	-3.42572	-1.56679	-0.362919	Slc22a8	solute carrier family 22 (organic anion transporter), member 8
1456057_x_at	0.0815163	0.00247	-3.42333	-1.57205	-0.276529	Tmem109	transmembrane protein 109
1425092_at	0.0815163	0.00247	-3.42328	-1.57214	-0.206688	Cdh10	cadherin 10
1433733_a_at	0.0815163	0.00248	-3.42288	-1.57303	-0.209865	Cry1	cryptochrome 1 (photolyase-like)
1439008_at	0.0815163	0.00248	-3.42277	-1.57326	-0.180253	Zfp319	zinc finger protein 319
1452749_at	0.0815163	0.00248	-3.42271	-1.57341	-0.145016	Mtpap	mitochondrial poly(A) polymerase
1437631_at	0.0815631	0.00248	-3.42216	-1.57461	-0.23517	Kcnip4	Kv channel interacting protein 4
1454814_s_at	0.0816693	0.00249	3.42094	-1.57727	0.17127	Prps1l3	phosphoribosyl pyrophosphate synthetase 1-like 3
1437308_s_at	0.0816693	0.00249	-3.42072	-1.57777	-0.234783	F2r	coagulation factor II (thrombin) receptor
1452091_a_at	0.0816693	0.00249	3.4205	-1.57826	0.215315	Rbm28	RNA binding motif protein 28
1432361_a_at	0.0816693	0.00249	-3.42039	-1.5785	-0.266887	Cenpp	centromere protein P
1458425_at	0.0816853	0.00249	-3.42	-1.57935	-0.146112	A430046D13Rik	Riken cDNA A430046D13 gene
1427486_at	0.0817572	0.0025	-3.41926	-1.58096	-0.220654	Ptprb	protein tyrosine phosphatase, receptor type, B
1436367_at	0.0817572	0.0025	-3.41902	-1.58151	-0.204789	Ptprb	protein tyrosine phosphatase, receptor type, B
1417045_at	0.0818228	0.0025	3.41837	-1.58292	0.171511	Bid	BH3 interacting domain death agonist
1421028_a_at	0.0819235	0.00251	-3.41755	-1.58472	-0.205637	Mef2c	myocyte enhancer factor 2C
1445259_at	0.0819728	0.00251	-3.41656	-1.58688	-0.184779	Scn2a1	sodium channel, voltage-gated, type II, alpha 1
1437355_at	0.0819728	0.00252	-3.41631	-1.58744	-0.208917	Zcchc5	zinc finger, CCHC domain containing 5
1419392_at	0.0819728	0.00252	-3.41616	-1.58778	-0.205647	Pclo	piccolo (presynaptic cytomatrix protein)
1416041_at	0.0819728	0.00252	3.41568	-1.58883	0.521349	Sgk1	serum/glucocorticoid regulated kinase 1
1450074_at	0.0819728	0.00252	3.41563	-1.58894	0.161958	Kif3b	kinesin family member 3B
1439845_at	0.0819728	0.00252	-3.41547	-1.58928	-0.169658	Hp1bp3	heterochromatin protein 1, binding protein 3
1456735_x_at	0.0821082	0.00253	-3.41443	-1.59157	-0.248815	Pxylp1	2-phosphoxylose phosphatase 1
1437890_at	0.0821082	0.00253	3.41385	-1.59283	0.251462	Btbd17	BTB (POZ) domain containing 17
1433332_at	0.0821082	0.00253	3.41327	-1.59411	0.138757	C030004M13Rik	RIKEN cDNA C030004M13 gene
1440221_at	0.0821082	0.00254	-3.41307	-1.59455	-0.163449	AA408650	expressed sequence AA408650
1428357_at	0.0821082	0.00254	-3.41304	-1.59462	-0.148321	Tdrp	testis development related protein
1426683_at	0.0821082	0.00254	3.41296	-1.59479	0.17456	Cnot6	CCR4-NOT transcription complex, subunit 6
1416086_at	0.0821659	0.00254	-3.41236	-1.59611	-0.166821	Tpst2	protein-tyrosine sulfotransferase 2
1423941_at	0.0825094	0.00255	-3.4103	-1.60062	-0.165601	Camk2g	calcium/calmodulin-dependent protein kinase II gamma
1422855_at	0.0825504	0.00256	-3.40979	-1.60174	-0.150362	Cpsf3	cleavage and polyadenylation specificity factor 3
1436917_s_at	0.0825602	0.00256	-3.40944	-1.60251	-0.337467	Gpsm1	G-protein signalling modulator 1 (AGS3-like, C. elegans)
1460257_a_at	0.0827555	0.00257	-3.40763	-1.60647	-0.223309	Mthfsl///Mthfs	5, 10-methenyltetrahydrofolate synthetase-like///5, 10-methenyltetrahydrofolate synthetase
1429510_at	0.0827555	0.00257	-3.40742	-1.60693	-0.232965	2810410L24Rik	RIKEN cDNA 2810410L24 gene
1424533_a_at	0.0827555	0.00257	3.40695	-1.60796	0.156862	Ccdc137	coiled-coil domain containing 137
1436942_at	0.0827555	0.00257	-3.40694	-1.60798	-0.235233	A930035D04Rik	RIKEN cDNA A930035D04 gene
1433422_at	0.0827555	0.00258	3.40652	-1.60891	0.194292	Nr4a2	nuclear receptor subfamily 4, group A, member 2
1425974_a_at	0.0827555	0.00258	-3.4062	-1.60962	-0.149419	Trim25	tripartite motif-containing 25
1451489_at	0.0827555	0.00258	-3.40567	-1.61077	-0.221026	Slc25a35	solute carrier family 25, member 35
1438832_x_at	0.0827555	0.00258	-3.40526	-1.61167	-0.161236	Dhx30	DEAH (Asp-Glu-Ala-His) box polypeptide 30
1434417_at	0.0827555	0.00258	3.40514	-1.61194	0.169871	Capn15	calpain 15
1437525_a_at	0.0828485	0.00259	-3.40437	-1.61363	-0.299819	Polr3a	polymerase (RNA) III (DNA directed) polypeptide A
1457156_at	0.0828942	0.00259	-3.40374	-1.61501	-0.215503	Trhde	TRH-degrading enzyme
1451223_a_at	0.0828942	0.00259	-3.40354	-1.61545	-0.210125	Btf3l4	basic transcription factor 3-like 4
1424793_a_at	0.0830802	0.0026	3.40229	-1.61818	0.15557	Pbp2	phosphatidylethanolamine binding protein 2
1434447_at	0.0831001	0.00261	-3.40162	-1.61965	-0.298552	Met	met proto-oncogene
1434313_at	0.0831001	0.00261	3.4016	-1.6197	0.222013	Ccdc126	coiled-coil domain containing 126
1458911_at	0.0833133	0.00261	3.40021	-1.62274	0.252392	Spef2	sperm flagellar 2
1424436_at	0.0833133	0.00262	-3.3999	-1.62343	-0.183038	Gart	phosphoribosylglycinamide formyltransferase
1458386_at	0.0833133	0.00262	3.39962	-1.62403	0.210338	C030009J22Rik	RIKEN cDNA C030009J22 gene
1435265_at	0.0834604	0.00263	-3.39828	-1.62696	-0.202748	Fbxo32	F-box protein 32
1418151_at	0.0834711	0.00263	3.39779	-1.62803	0.163491	Mtmr4	myotubularin related protein 4
1454870_x_at	0.0834711	0.00263	-3.3976	-1.62847	-0.233937	Slc52a2	solute carrier protein 52, member 2
1457753_at	0.0834711	0.00263	3.39718	-1.62937	0.266496	Tlr13	toll-like receptor 13
1455841_s_at	0.0834711	0.00263	-3.39704	-1.62967	-0.178131	Grwd1	glutamate-rich WD repeat containing 1
1442396_at	0.0836811	0.00264	3.3956	-1.63284	0.180235	A730020M07Rik	RIKEN cDNA A730020M07 gene
1444452_at	0.0836811	0.00264	-3.39539	-1.63329	-0.272437	D930002L09Rik	RIKEN cDNA D930002L09 gene
1418003_at	0.0836873	0.00265	3.39507	-1.63401	0.190162	Rgcc	regulator of cell cycle
1433966_x_at	0.0837109	0.00265	-3.39465	-1.63491	-0.181846	Asns	asparagine synthetase
1445691_at	0.0837749	0.00266	-3.3931	-1.63831	-0.164217	Chn1	chimerin 1
1454988_s_at	0.0837749	0.00266	3.39307	-1.63838	0.147247	Rab22a	RAB22A, member RAS oncogene family
1426723_at	0.0837749	0.00266	3.39296	-1.63862	0.163193	Wdr48	WD repeat domain 48
1453647_at	0.0837749	0.00266	3.39287	-1.63881	0.199592	E130112N10Rik///Vamp1	RIKEN cDNA E130112N10 gene///vesicle-associated membrane protein 1
1418355_at	0.0837749	0.00266	-3.39285	-1.63885	-0.187138	Nucb2	nucleobindin 2
1458273_at	0.0838943	0.00267	-3.39196	-1.64081	-0.217263	Hnrnpd	heterogeneous nuclear ribonucleoprotein D
1429051_s_at	0.0839878	0.00267	3.3912	-1.64248	0.168428	Sox11	SRY (sex determining region Y)-box 11
1447141_at	0.084067	0.00267	3.3905	-1.644	0.16901	AW107722	expressed sequence AW107722
1417659_at	0.0841286	0.00268	-3.3899	-1.64531	-0.181812	Vps29	VPS29 retromer complex component
1428065_at	0.0843462	0.00269	-3.38852	-1.64834	-0.16817	Slc44a2	solute carrier family 44, member 2
1443827_x_at	0.0845885	0.0027	-3.38702	-1.65163	-0.307489	Fam20c	family with sequence similarity 20, member C
1428199_at	0.0847201	0.0027	3.38577	-1.65436	0.202917	Adal	adenosine deaminase-like
1415770_at	0.0847201	0.00271	-3.38558	-1.65477	-0.20803	Wdr6	WD repeat domain 6
1437842_at	0.0847435	0.00271	-3.38507	-1.65589	-0.436279	Plcxd1	phosphatidylinositol-specific phospholipase C, X domain containing 1
1435645_at	0.0852688	0.00273	-3.38217	-1.66223	-0.206161	Mmd	monocyte to macrophage differentiation-associated
1456051_at	0.0852795	0.00273	-3.3813	-1.66414	-0.248915	Drd1	dopamine receptor D1
1422778_at	0.0852795	0.00273	-3.38124	-1.66426	-0.169292	Gm12372///Taf9	predicted gene 12372///TATA-box binding protein associated factor 9
1434717_at	0.0852841	0.00274	-3.38093	-1.66495	-0.171612	Cul3	cullin 3
1456782_at	0.0853444	0.00274	-3.38034	-1.66624	-0.181432	Pogk///Tada1	pogo transposable element with KRAB domain///transcriptional adaptor 1
1457879_at	0.0855963	0.00275	3.3788	-1.6696	0.168127	A230107O07Rik	RIKEN cDNA A230107O07 gene
1458334_at	0.0857294	0.00276	3.37786	-1.67167	0.208353	Wnt7a	wingless-type MMTV integration site family, member 7A
1423655_a_at	0.0859841	0.00277	-3.37602	-1.67568	-0.183114	Ctc1	CTS telomere maintenance complex component 1
1446867_at	0.0860113	0.00277	3.3756	-1.67661	0.190376	Wdfy4	WD repeat and FYVE domain containing 4
1417920_at	0.0863164	0.00278	-3.37382	-1.68051	-0.310422	Amn	amnionless
1453125_at	0.0867394	0.0028	3.37146	-1.68565	0.229604	Sox11	SRY (sex determining region Y)-box 11
1437068_at	0.0868171	0.0028	3.37079	-1.68711	0.197379	Cenpk	centromere protein K
1437085_at	0.0868556	0.00281	3.37032	-1.68815	0.204165	D630039A03Rik	RIKEN cDNA D630039A03 gene
1417676_a_at	0.0868821	0.00281	-3.3699	-1.68907	-0.201777	Ptpro	protein tyrosine phosphatase, receptor type, O
1428427_at	0.087018	0.00281	-3.36895	-1.69114	-0.20232	Fbxl2	F-box and leucine-rich repeat protein 2
1450516_a_at	0.0870621	0.00282	3.36836	-1.69243	0.180985	Rab17	RAB17, member RAS oncogene family
1434206_s_at	0.0870621	0.00282	3.36787	-1.6935	0.2099	Ppp2r5c	protein phosphatase 2, regulatory subunit B', gamma
1443236_at	0.087246	0.00283	3.36654	-1.6964	0.23515	B230118H07Rik	RIKEN cDNA B230118H07 gene
1438382_x_at	0.087246	0.00283	-3.3664	-1.69672	-0.185942	Urgcp	upregulator of cell proliferation
1454896_at	0.087255	0.00283	-3.36607	-1.69744	-0.181301	Rbpj	recombination signal binding protein for immunoglobulin kappa J region
1448562_at	0.0873554	0.00284	3.36498	-1.69982	0.202065	Upp1	uridine phosphorylase 1
1448950_at	0.0873554	0.00284	3.36472	-1.70038	0.239967	Il1r1	interleukin 1 receptor, type I
1454843_at	0.0873554	0.00284	-3.36472	-1.70039	-0.131603	Prps2	phosphoribosyl pyrophosphate synthetase 2
1439516_at	0.0873707	0.00285	-3.36436	-1.70118	-0.205434	2610201A13Rik	RIKEN cDNA 2610201A13 gene
1435000_at	0.0874505	0.00285	-3.36368	-1.70265	-0.113306	Gspt1	G1 to S phase transition 1
1454214_a_at	0.0875816	0.00286	-3.36276	-1.70466	-0.152489	Znhit6	zinc finger, HIT type 6
1429962_at	0.087618	0.00286	-3.36218	-1.70593	-0.165378	Cebpz	CCAAT/enhancer binding protein zeta
1431430_s_at	0.087618	0.00286	-3.36201	-1.70629	-0.258646	Trim59	tripartite motif-containing 59
1440871_at	0.0876519	0.00286	-3.36156	-1.70728	-0.230177	Magi1	membrane associated guanylate kinase, WW and PDZ domain containing 1
1438428_at	0.0877893	0.00287	-3.36062	-1.70935	-0.218057	Jph1	junctophilin 1
1451216_at	0.0878668	0.00288	-3.35967	-1.71141	-0.13412	Zfp330	zinc finger protein 330
1434114_at	0.0881663	0.00289	3.3574	-1.71638	0.153658	Rexo4	REX4, 3'-5' exonuclease
1446174_at	0.0881663	0.00289	-3.35733	-1.71653	-0.249145	Gm4988	predicted gene 4988
1445233_at	0.0881663	0.00289	3.35731	-1.71657	0.196204	Rhbdl2	rhomboid, veinlet-like 2 (Drosophila)
1452110_at	0.0881663	0.0029	3.3569	-1.71748	0.234305	Mtrr	5-methyltetrahydrofolate-homocysteine methyltransferase reductase
1456064_at	0.0881663	0.0029	-3.35624	-1.71891	-0.235536	AI504432	expressed sequence AI504432
1435704_at	0.0881663	0.0029	-3.3561	-1.71922	-0.224429	C920006O11Rik	RIKEN cDNA C920006O11 gene
1456676_a_at	0.0881663	0.0029	3.35588	-1.7197	0.154889	Pfkfb3	6-phosphofructo-2-kinase/fructose-2,6-biphosphatase 3
1446169_at	0.0881663	0.0029	3.35567	-1.72015	0.20321	Dgcr8	DiGeorge syndrome critical region gene 8
1418400_at	0.0882784	0.00291	-3.35485	-1.72195	-0.172035	Larp6	La ribonucleoprotein domain family, member 6
1436462_at	0.088382	0.00292	-3.35407	-1.72365	-0.21571	Gm35744///Gm4724///Gm14308///0610010B08Rik///Gm14434///Gm14326///Gm14391///Gm14430	predicted gene, 35744///predicted gene 4724///predicted gene 14308///RIKEN cDNA 0610010B08 gene///predicted gene 14434///predicted gene 14326///predicted gene 14391///predicted gene 14430
1450974_at	0.088565	0.00292	3.35282	-1.72636	0.179773	Timp4	tissue inhibitor of metalloproteinase 4
1448921_a_at	0.088565	0.00293	-3.35195	-1.72828	-0.185846	Mrps9	mitochondrial ribosomal protein S9
1428089_at	0.088565	0.00293	-3.35187	-1.72845	-0.195664	Slitrk1	SLIT and NTRK-like family, member 1
1427528_a_at	0.088565	0.00293	-3.35182	-1.72855	-0.168679	Epha7	Eph receptor A7
1419324_at	0.088565	0.00294	-3.35127	-1.72976	-0.211857	Lhx9	LIM homeobox protein 9
1423684_at	0.088565	0.00294	-3.35093	-1.7305	-0.163752	Hnrnpk	heterogeneous nuclear ribonucleoprotein K
1449847_a_at	0.0886033	0.00294	3.35046	-1.73152	0.22531	Col4a3bp	collagen, type IV, alpha 3 (Goodpasture antigen) binding protein
1421396_at	0.0886724	0.00295	3.34963	-1.73334	0.232035	Pcsk1	proprotein convertase subtilisin/kexin type 1
1454622_at	0.0886724	0.00295	-3.34957	-1.73347	-0.226867	Slc38a5	solute carrier family 38, member 5
1426043_a_at	0.0889092	0.00296	3.34816	-1.73654	0.164673	Capn3	calpain 3
1424444_a_at	0.0890869	0.00297	3.34683	-1.73945	0.168087	1600014C10Rik	RIKEN cDNA 1600014C10 gene
1437418_at	0.0890869	0.00297	3.34675	-1.73961	0.363403	Gm3515	predicted gene 3515
1440953_at	0.0891969	0.00297	-3.34595	-1.74136	-0.176336	1700096K18Rik	RIKEN cDNA 1700096K18 gene
1456141_x_at	0.089254	0.00298	-3.3453	-1.74278	-0.254936	Brcc3	BRCA1/BRCA2-containing complex, subunit 3
1436195_at	0.089254	0.00298	-3.34512	-1.74318	-0.311696	Lrrc75a	leucine rich repeat containing 75A
1421498_a_at	0.0895584	0.00299	3.34293	-1.74795	0.17331	2010204K13Rik	RIKEN cDNA 2010204K13 gene
1419274_at	0.0895584	0.00299	-3.3429	-1.74802	-0.149734	Uri1	URI1, prefoldin-like chaperone
1457554_at	0.0895584	0.00299	3.34281	-1.74821	0.184195	Apob	apolipoprotein B
1447946_at	0.0895584	0.003	-3.34255	-1.74877	-0.179947	Adam23	a disintegrin and metallopeptidase domain 23
1458311_at	0.0896127	0.003	3.34202	-1.74994	0.161157	Usp36	ubiquitin specific peptidase 36
1442073_at	0.089658	0.003	-3.3415	-1.75107	-0.272577	Inpp1	inositol polyphosphate-1-phosphatase
1439963_x_at	0.089658	0.00301	-3.34124	-1.75162	-0.194657	Saxo2	stablizer of axonemal microtubules 2
1456673_at	0.0898351	0.00301	3.34013	-1.75405	0.173464	Trim71	tripartite motif-containing 71
1452296_at	0.0899884	0.00302	-3.33913	-1.75623	-0.234911	Slit3	slit homolog 3 (Drosophila)
1429403_x_at	0.0900345	0.00302	3.33863	-1.75731	0.172335	Glt8d2	glycosyltransferase 8 domain containing 2
1435893_at	0.0902852	0.00304	-3.33684	-1.76122	-0.182265	Vldlr	very low density lipoprotein receptor
1434418_at	0.0902852	0.00304	-3.33662	-1.7617	-0.144457	Cers6	ceramide synthase 6
1459552_at	0.0908113	0.00306	3.33389	-1.76766	0.260821	Lurap1l	leucine rich adaptor protein 1-like
1456962_at	0.0908528	0.00306	3.33341	-1.76869	0.246453	Cntn2	contactin 2
1450667_a_at	0.0910193	0.00307	-3.33187	-1.77205	-0.158014	Cs	citrate synthase
1438523_x_at	0.0910193	0.00308	3.33111	-1.77372	0.140292	Srrm4	serine/arginine repetitive matrix 4
1443838_x_at	0.0910193	0.00308	-3.33102	-1.77391	-0.201454	Fads2	fatty acid desaturase 2
1434856_at	0.0910193	0.00308	-3.33099	-1.77397	-0.244926	Ankrd44	ankyrin repeat domain 44
1437004_at	0.0910193	0.00308	3.33083	-1.77432	0.212451	Trim43a	tripartite motif-containing 43A
1432329_a_at	0.0910193	0.00308	-3.3307	-1.77462	-0.169608	Matk	megakaryocyte-associated tyrosine kinase
1421946_at	0.0912036	0.00309	3.32931	-1.77762	0.238876	Crp	C-reactive protein, pentraxin-related
1441471_at	0.0912036	0.0031	3.32843	-1.77955	0.141076	2810002D19Rik	RIKEN cDNA 2810002D19 gene
1457918_at	0.0912036	0.0031	-3.32831	-1.77981	-0.205657	Tnfaip2	tumor necrosis factor, alpha-induced protein 2
1446940_at	0.0912036	0.0031	3.32816	-1.78015	0.228122	Traf6	TNF receptor-associated factor 6
1423374_at	0.0912036	0.00311	-3.32744	-1.7817	-0.195785	Ncoa6	nuclear receptor coactivator 6
1427215_at	0.0912036	0.00311	3.32706	-1.78254	0.178036	Acsm2	acyl-CoA synthetase medium-chain family member 2
1431734_a_at	0.0912036	0.00311	3.32698	-1.78272	0.157996	Dnajb4	DnaJ heat shock protein family (Hsp40) member B4
1445601_at	0.0912036	0.00311	3.32679	-1.78311	0.166234	Gm12596	predicted gene 12596
1425660_at	0.0912036	0.00311	-3.32678	-1.78313	-0.194711	Btbd3	BTB (POZ) domain containing 3
1437438_x_at	0.0912036	0.00311	3.32669	-1.78333	0.136272	Pnliprp2	pancreatic lipase-related protein 2
1436427_at	0.0912036	0.00311	3.32635	-1.78408	0.227295	Prpf4b	pre-mRNA processing factor 4B
1437143_a_at	0.0912036	0.00311	-3.32629	-1.7842	-0.162665	Tmx1	thioredoxin-related transmembrane protein 1
1458664_at	0.0912036	0.00311	-3.32625	-1.78429	-0.216539	A430103D13Rik	RIKEN cDNA A430103D13 gene
1423398_at	0.0912691	0.00312	3.32567	-1.78555	0.178309	Taf12	TATA-box binding protein associated factor 12
1440459_at	0.0912919	0.00312	-3.32509	-1.78682	-0.214421	Setx	senataxin
1447834_at	0.0912919	0.00313	3.32461	-1.78787	0.230719	Copz1	coatomer protein complex, subunit zeta 1
1428789_at	0.0912919	0.00313	3.32447	-1.78816	0.128571	Ralgps2	Ral GEF with PH domain and SH3 binding motif 2
1442466_a_at	0.0912919	0.00313	-3.32447	-1.78817	-0.259588	Ppip5k1	diphosphoinositol pentakisphosphate kinase 1
1438635_x_at	0.0917248	0.00314	-3.32215	-1.79322	-0.224445	Fndc10	fibronectin type III domain containing 10
1434429_at	0.0917248	0.00315	-3.3219	-1.79376	-0.234573	Syt16	synaptotagmin XVI
1418445_at	0.0917248	0.00315	-3.32165	-1.79432	-0.156649	Slc16a2	solute carrier family 16 (monocarboxylic acid transporters), member 2
1433518_at	0.0917316	0.00315	-3.32134	-1.79498	-0.203858	Lcmt2	leucine carboxyl methyltransferase 2
1435216_a_at	0.0918637	0.00316	-3.32046	-1.79691	-0.193217	Odf2	outer dense fiber of sperm tails 2
1450187_a_at	0.0922655	0.00317	-3.31834	-1.80152	-0.126108	Galt	galactose-1-phosphate uridyl transferase
1428400_at	0.0923706	0.00318	-3.31748	-1.80339	-0.185995	Vstm5	V-set and transmembrane domain containing 5
1447559_at	0.0923706	0.00318	-3.31715	-1.80412	-0.233111	Gpr25	G protein-coupled receptor 25
1449425_at	0.0923706	0.00318	3.31704	-1.80435	0.174652	Wnt2	wingless-type MMTV integration site family, member 2
1448432_at	0.0924539	0.00319	-3.31638	-1.80577	-0.183771	Plcd1	phospholipase C, delta 1
1444150_at	0.0925699	0.00319	-3.31555	-1.80758	-0.246157	Epb41	erythrocyte membrane protein band 4.1
1429015_at	0.0925699	0.0032	-3.31518	-1.80839	-0.187453	Ankzf1	ankyrin repeat and zinc finger domain containing 1
1448306_at	0.0925699	0.0032	3.31504	-1.80871	0.331523	Nfkbia	nuclear factor of kappa light polypeptide gene enhancer in B cells inhibitor, alpha
1435298_at	0.0928989	0.00321	-3.31326	-1.81257	-0.16113	Cog5	component of oligomeric golgi complex 5
1435747_at	0.0929481	0.00321	-3.31277	-1.81364	-0.234408	Fgf14	fibroblast growth factor 14
1452740_at	0.0929566	0.00322	-3.3122	-1.81487	-0.164744	Myh10	myosin, heavy polypeptide 10, non-muscle
1437210_a_at	0.0929566	0.00322	-3.31218	-1.81491	-0.174367	Brd2	bromodomain containing 2
1441315_s_at	0.0929679	0.00323	-3.31138	-1.81666	-0.2419	Slc19a2	solute carrier family 19 (thiamine transporter), member 2
1449470_at	0.0929679	0.00323	-3.31122	-1.81701	-0.218211	Dlx1	distal-less homeobox 1
1436734_at	0.0929679	0.00323	-3.31105	-1.81738	-0.172507	Plppr1	phospholipid phosphatase related 1
1419165_at	0.0931599	0.00324	-3.30963	-1.82045	-0.186365	Zfp260	zinc finger protein 260
1423103_at	0.0935068	0.00325	-3.30772	-1.82461	-0.173424	Rfx5	regulatory factor X, 5 (influences HLA class II expression)
1448468_a_at	0.0935068	0.00326	-3.30741	-1.8253	-0.155016	Kcnab1	potassium voltage-gated channel, shaker-related subfamily, beta member 1
1447923_at	0.0935068	0.00326	-3.30724	-1.82567	-0.202982	1810026B05Rik	RIKEN cDNA 1810026B05 gene
1419653_a_at	0.0935068	0.00326	-3.30651	-1.82725	-0.19412	Ddx5	DEAD (Asp-Glu-Ala-Asp) box polypeptide 5
1434495_at	0.0935068	0.00327	-3.30607	-1.8282	-0.169365	Patz1	POZ (BTB) and AT hook containing zinc finger 1
1438637_x_at	0.0935068	0.00327	-3.30606	-1.82822	-0.265952	Sf3b2	splicing factor 3b, subunit 2
1424248_at	0.0935068	0.00327	-3.30595	-1.82847	-0.242159	Arpp21	cyclic AMP-regulated phosphoprotein, 21
1442397_at	0.0935068	0.00327	-3.3059	-1.82857	-0.224422	Nfx1	nuclear transcription factor, X-box binding 1
1450717_at	0.0937307	0.00328	3.30462	-1.83135	0.198878	Ang	angiogenin, ribonuclease, RNase A family, 5
1435456_at	0.0938265	0.00328	-3.30392	-1.83288	-0.22162	Ttc28	tetratricopeptide repeat domain 28
1420767_at	0.093839	0.00329	3.30359	-1.83358	0.163896	Nat8f4	N-acetyltransferase 8 (GCN5-related) family member 4
1449126_at	0.0938492	0.00329	-3.30328	-1.83427	-0.191002	Zfp90	zinc finger protein 90
1418073_at	0.093862	0.00329	-3.30295	-1.83498	-0.141171	Acot9	acyl-CoA thioesterase 9
1444025_at	0.0939282	0.0033	-3.30222	-1.83656	-0.238021	Kcnj3	potassium inwardly-rectifying channel, subfamily J, member 3
1451347_at	0.0939282	0.0033	3.30212	-1.83679	0.235893	Ino80e	INO80 complex subunit E
1430510_at	0.0942204	0.00331	3.30026	-1.84082	0.185756	Evi5l	ecotropic viral integration site 5 like
1421357_at	0.0942204	0.00331	3.30019	-1.84099	0.161258	Gtf2a1	general transcription factor II A, 1
1455638_at	0.0942204	0.00331	3.29993	-1.84155	0.230418	Zfp319	zinc finger protein 319
1424423_at	0.0942204	0.00332	3.29973	-1.84198	0.171491	Flad1///Lenep	flavin adenine dinucleotide synthetase 1///lens epithelial protein
1449579_at	0.0942801	0.00332	-3.29872	-1.84419	-0.168898	Sh3yl1	Sh3 domain YSC-like 1
1416422_a_at	0.0942801	0.00332	-3.29858	-1.84448	-0.331939	Ssb	Sjogren syndrome antigen B
1458112_at	0.0942801	0.00333	-3.29837	-1.84494	-0.232842	Adarb2	adenosine deaminase, RNA-specific, B2
1425479_at	0.0942801	0.00333	-3.29821	-1.84529	-0.139396	Smyd5	SET and MYND domain containing 5
1424497_at	0.0942801	0.00333	-3.29813	-1.84546	-0.148392	Tmem219	transmembrane protein 219
1419102_at	0.0943482	0.00333	-3.29756	-1.8467	-0.219515	Sin3a	transcriptional regulator, SIN3A (yeast)
1456783_at	0.0944751	0.00334	3.29672	-1.84851	0.185872	Zdbf2	zinc finger, DBF-type containing 2
1418329_at	0.094821	0.00335	3.2949	-1.85247	0.158172	Pgpep1	pyroglutamyl-peptidase I
1450769_s_at	0.094821	0.00336	3.29464	-1.85303	0.131136	Stard5	StAR-related lipid transfer (START) domain containing 5
1448041_at	0.095232	0.00338	3.29215	-1.85845	0.212129	Gm36527///Rnf2	predicted gene, 36527///ring finger protein 2
1451085_at	0.095232	0.00338	-3.29214	-1.85847	-0.185574	C030006K11Rik	RIKEN cDNA C030006K11 gene
1452757_s_at	0.095232	0.00338	3.29201	-1.85875	0.22126	Hba-a2///Hba-a1	hemoglobin alpha, adult chain 2///hemoglobin alpha, adult chain 1
1418941_at	0.0956538	0.0034	-3.28961	-1.86397	-0.190609	Pcdhb22	protocadherin beta 22
1454725_at	0.0958793	0.00341	3.28834	-1.86671	0.298243	Tra2a	transformer 2 alpha homolog (Drosophila)
1425346_at	0.0961022	0.00342	-3.28709	-1.86942	-0.178514	Zfp318	zinc finger protein 318
1428399_a_at	0.0963311	0.00343	-3.28582	-1.87219	-0.216794	Armc9	armadillo repeat containing 9
1444681_at	0.0963401	0.00343	-3.28551	-1.87285	-0.244261	Gm34996	predicted gene, 34996
1441496_at	0.0964206	0.00343	-3.2849	-1.87419	-0.202515	Tdrd3	tudor domain containing 3
1430630_at	0.0967048	0.00345	-3.28338	-1.87747	-0.218546	Gm34221	predicted gene, 34221
1426719_at	0.0968029	0.00345	-3.28269	-1.87898	-0.156305	Apbb2	amyloid beta (A4) precursor protein-binding, family B, member 2
1437829_s_at	0.0968331	0.00345	-3.28229	-1.87984	-0.193361	Eef2k	eukaryotic elongation factor-2 kinase
1424632_a_at	0.0969106	0.00346	-3.28169	-1.88115	-0.164289	Rev3l	REV3 like, DNA directed polymerase zeta catalytic subunit
1425998_at	0.0969672	0.00346	3.28102	-1.88259	0.174268	Sytl4	synaptotagmin-like 4
1450659_at	0.0969672	0.00347	-3.28091	-1.88283	-0.127824	Rgs7	regulator of G protein signaling 7
1424723_s_at	0.0969886	0.00347	3.28056	-1.8836	0.144574	Cstf3	cleavage stimulation factor, 3' pre-RNA, subunit 3
1444809_at	0.0972235	0.00349	3.27845	-1.88817	0.197018	Marveld3	MARVEL (membrane-associating) domain containing 3
1460053_at	0.0972235	0.00349	-3.27829	-1.88851	-0.161434	Smyd4	SET and MYND domain containing 4
1429071_at	0.0972235	0.00349	-3.27826	-1.88858	-0.201451	Me3	malic enzyme 3, NADP(+)-dependent, mitochondrial
1439570_at	0.0972235	0.00349	-3.27824	-1.88864	-0.16499	Gareml	GRB2 associated, regulator of MAPK1-like
1429833_at	0.0972235	0.00349	3.27822	-1.88868	0.164175	Ly6g6e	lymphocyte antigen 6 complex, locus G6E
1434407_at	0.0972977	0.00349	3.27763	-1.88995	0.155058	Srgap2	SLIT-ROBO Rho GTPase activating protein 2
1439397_at	0.0973717	0.0035	-3.27705	-1.89122	-0.270562	Fmn1	formin 1
1442307_at	0.0974493	0.0035	3.27628	-1.89288	0.220092	Usp15	ubiquitin specific peptidase 15
1417081_a_at	0.0974493	0.0035	-3.27618	-1.89308	-0.174467	Syngr2	synaptogyrin 2
1454802_x_at	0.097672	0.00351	-3.27495	-1.89575	-0.148266	Arih2	ariadne RBR E3 ubiquitin protein ligase 2
1453623_a_at	0.0982517	0.00354	-3.27167	-1.90287	-0.176786	Rad23a	RAD23 homolog A, nucleotide excision repair protein
1437254_at	0.0982517	0.00354	3.27153	-1.90318	0.230358	Cep76	centrosomal protein 76
1449510_at	0.098306	0.00355	-3.2709	-1.90454	-0.226419	Zfp467	zinc finger protein 467
1437333_x_at	0.0984598	0.00356	3.26997	-1.90654	0.170832	Aldh18a1	aldehyde dehydrogenase 18 family, member A1
1460033_at	0.0984604	0.00356	3.26971	-1.90711	0.290132	A330023F24Rik	RIKEN cDNA A330023F24 gene
1428758_at	0.0985312	0.00356	-3.26911	-1.90841	-0.18112	Tmem86a	transmembrane protein 86A
1436905_x_at	0.0985312	0.00357	-3.26889	-1.9089	-0.270559	Laptm5	lysosomal-associated protein transmembrane 5
1439561_at	0.0986194	0.00357	-3.26824	-1.91029	-0.190202	Borcs7	BLOC-1 related complex subunit 7
1439275_s_at	0.098796	0.00358	3.26722	-1.9125	0.179786	9530010C24Rik	RIKEN cDNA 9530010C24 gene
1424571_at	0.098937	0.00359	-3.26619	-1.91474	-0.186238	Ddx46	DEAD (Asp-Glu-Ala-Asp) box polypeptide 46
1439910_a_at	0.098937	0.00359	3.2661	-1.91494	0.186559	Tradd	TNFRSF1A-associated via death domain
1450034_at	0.0989487	0.00359	3.26579	-1.91561	0.162592	Stat1	signal transducer and activator of transcription 1
1441336_at	0.0990478	0.0036	3.26474	-1.91787	0.246038	Nutm1	NUT midline carcinoma, family member 1
1448842_at	0.0990478	0.0036	-3.26454	-1.91831	-0.222107	Cdo1	cysteine dioxygenase 1, cytosolic
1423346_at	0.0990478	0.0036	-3.26439	-1.91864	-0.162888	Degs1	delta(4)-desaturase, sphingolipid 1
1446986_at	0.0990478	0.00361	3.26378	-1.91995	0.180963	Scrt2	scratch family zinc finger 2
1435484_at	0.0990478	0.00361	3.26322	-1.92117	0.250052	Slc5a3	solute carrier family 5 (inositol transporters), member 3
1417050_at	0.0990478	0.00361	-3.26319	-1.92125	-0.175417	C1qtnf4	C1q and tumor necrosis factor related protein 4
1439967_at	0.0990478	0.00362	-3.26232	-1.92312	-0.198319	1700071A11Rik	RIKEN cDNA 1700071A11 gene
1435800_a_at	0.0990478	0.00362	-3.26227	-1.92324	-0.214093	Ybx3	Y box protein 3
1437027_x_at	0.0990478	0.00362	-3.26212	-1.92355	-0.185193	Rnps1	ribonucleic acid binding protein S1
1446708_at	0.0990478	0.00362	3.26211	-1.92357	0.237056	Hif3a	hypoxia inducible factor 3, alpha subunit
1440205_at	0.0990478	0.00362	3.26202	-1.92376	0.173647	Zmynd19	zinc finger, MYND domain containing 19
1454687_at	0.0990478	0.00362	-3.26201	-1.92378	-0.134156	Lrfn5	leucine rich repeat and fibronectin type III domain containing 5
1428305_at	0.0990478	0.00363	-3.2617	-1.92446	-0.273554	Pcsk2	proprotein convertase subtilisin/kexin type 2
1423320_at	0.0990478	0.00363	3.26127	-1.9254	0.188301	Dnase1l2	deoxyribonuclease 1-like 2
1419465_at	0.0990478	0.00363	3.26127	-1.9254	0.233199	Nkd2	naked cuticle 2 homolog (Drosophila)
1434585_at	0.0990478	0.00363	-3.26123	-1.92548	-0.171471	Gm2808///Tulp4	predicted gene 2808///tubby like protein 4
1437199_at	0.0992085	0.00364	3.26029	-1.92753	0.232102	Dusp5	dual specificity phosphatase 5
1455351_at	0.0992207	0.00364	-3.25998	-1.9282	-0.185831	U2surp	U2 snRNP-associated SURP domain containing
1431042_at	0.0993099	0.00365	3.25884	-1.93065	0.271401	Paqr8	progestin and adipoQ receptor family member VIII
1418736_at	0.0993099	0.00365	-3.25872	-1.93092	-0.189679	B3galnt1	UDP-GalNAc:betaGlcNAc beta 1,3-galactosaminyltransferase, polypeptide 1
1416805_at	0.0993099	0.00366	-3.2583	-1.93182	-0.223166	Fam198b	family with sequence similarity 198, member B
1450729_at	0.0993099	0.00366	-3.25807	-1.93233	-0.121165	Hs2st1	heparan sulfate 2-O-sulfotransferase 1
1438046_at	0.0993099	0.00366	-3.25806	-1.93234	-0.236069	AU019823	expressed sequence AU019823
1418681_at	0.0993099	0.00366	-3.25806	-1.93235	-0.224819	Alg13	asparagine-linked glycosylation 13
1434386_at	0.0997622	0.00368	-3.25587	-1.93709	-0.14951	Atp2c1	ATPase, Ca++-sequestering
1431043_at	0.0997939	0.00368	-3.25547	-1.93796	-0.200122	Klhl40	kelch-like 40
1456261_at	0.0997939	0.00368	-3.25522	-1.93848	-0.24346	Sh3kbp1	SH3-domain kinase binding protein 1
1429988_at	0.0998756	0.00369	-3.25443	-1.9402	-0.177676	Zfp235	zinc finger protein 235
1416840_at	0.0998756	0.00369	-3.25436	-1.94034	-0.143065	Mid1ip1	Mid1 interacting protein 1 (gastrulation specific G12-like (zebrafish))
1433940_at	0.0999511	0.00369	-3.25379	-1.94159	-0.147203	Spag7	sperm associated antigen 7
1428804_at	0.100047	0.0037	-3.25298	-1.94333	-0.182275	Mfap3l	microfibrillar-associated protein 3-like
1435505_at	0.100047	0.0037	-3.25275	-1.94382	-0.149293	Dmwd	dystrophia myotonica-containing WD repeat motif
1423494_at	0.100047	0.00371	3.25242	-1.94455	0.145137	Teddm3	transmembrane epididymal family member 3
1453021_at	0.100047	0.00371	-3.25236	-1.94468	-0.205664	Stxbp5	syntaxin binding protein 5 (tomosyn)
1441851_x_at	0.100098	0.00371	3.25189	-1.9457	0.220234	Ly6g6c	lymphocyte antigen 6 complex, locus G6C
1423099_a_at	0.10013	0.00372	3.25113	-1.94733	0.158888	Mettl3	methyltransferase like 3
1431836_x_at	0.10013	0.00372	-3.25098	-1.94767	-0.190518	Mamstr	MEF2 activating motif and SAP domain containing transcriptional regulator
1428282_at	0.10013	0.00372	-3.25073	-1.94821	-0.182375	Tbce	tubulin-specific chaperone E
1444781_at	0.10013	0.00372	3.25066	-1.94835	0.17309	Gpn1	GPN-loop GTPase 1
1458890_at	0.10013	0.00372	3.25037	-1.94898	0.214363	D030055H07Rik	RIKEN cDNA D030055H07 gene
1434196_at	0.100454	0.00374	3.2486	-1.95281	0.160525	Dnaja4	DnaJ heat shock protein family (Hsp40) member A4
1428309_s_at	0.100561	0.00375	3.2479	-1.95433	0.160903	Pdrg1	p53 and DNA damage regulated 1
1429841_at	0.100665	0.00375	-3.2472	-1.95583	-0.188356	Megf10	multiple EGF-like-domains 10
1435881_at	0.100781	0.00376	-3.24646	-1.95743	-0.164959	Pcbp2	poly(rC) binding protein 2
1422442_at	0.100935	0.00377	-3.24556	-1.95939	-0.132079	Smu1	smu-1 suppressor of mec-8 and unc-52 homolog (C. elegans)
1429106_at	0.101472	0.00379	-3.24305	-1.96481	-0.170474	4921509J17Rik///Hspa4l	RIKEN cDNA 4921509J17 gene///heat shock protein 4 like
1436566_at	0.101508	0.00379	-3.24264	-1.96568	-0.216706	Rab40b	Rab40B, member RAS oncogene family
1428718_at	0.101575	0.0038	-3.24211	-1.96683	-0.138106	Scrn1	secernin 1
1437983_at	0.101625	0.0038	-3.24165	-1.96783	-0.294539	Sall1	sal-like 1 (Drosophila)
1451623_at	0.101761	0.00381	3.24083	-1.9696	0.232214	Mrpl15	mitochondrial ribosomal protein L15
1421127_at	0.10184	0.00381	3.24025	-1.97086	0.128741	Tmem42	transmembrane protein 42
1457032_at	0.101885	0.00382	-3.23981	-1.97182	-0.172732	Ak5	adenylate kinase 5
1438431_at	0.101899	0.00382	-3.23936	-1.97279	-0.222562	Abcd2	ATP-binding cassette, sub-family D (ALD), member 2
1454806_at	0.101899	0.00383	-3.23894	-1.97368	-0.184793	Fam49a	family with sequence similarity 49, member A
1428175_at	0.101899	0.00383	-3.23874	-1.97412	-0.181379	Tmem161b	transmembrane protein 161B
1440711_at	0.101918	0.00383	-3.23841	-1.97482	-0.141281	C630001G18Rik	RIKEN cDNA C630001G18 gene
1427495_at	0.102004	0.00384	3.2378	-1.97615	0.1472	Scn7a	sodium channel, voltage-gated, type VII, alpha
1420694_a_at	0.10225	0.00385	3.23652	-1.9789	0.185055	Dach1	dachshund 1 (Drosophila)
1415713_a_at	0.102437	0.00386	-3.2355	-1.98112	-0.149084	Ddx24	DEAD (Asp-Glu-Ala-Asp) box polypeptide 24
1450665_at	0.102519	0.00387	3.23441	-1.98348	0.168234	Gabpa	GA repeat binding protein, alpha
1438961_s_at	0.102519	0.00387	-3.23432	-1.98366	-0.157741	Blmh	bleomycin hydrolase
1426209_at	0.102519	0.00387	-3.2342	-1.98393	-0.147755	Strn4	striatin, calmodulin binding protein 4
1453670_at	0.102558	0.00387	3.23374	-1.98491	0.173708	Usp50	ubiquitin specific peptidase 50
1456351_at	0.102684	0.00388	-3.23297	-1.98658	-0.283579	Brd8	bromodomain containing 8
1422464_at	0.102918	0.00389	-3.23175	-1.98921	-0.133491	Mrpl3	mitochondrial ribosomal protein L3
1447273_x_at	0.102964	0.0039	3.23067	-1.99155	0.147957	Atp10a	ATPase, class V, type 10A
1440965_at	0.102964	0.0039	-3.23057	-1.99176	-0.201285	Pigl	phosphatidylinositol glycan anchor biosynthesis, class L
1450875_at	0.102964	0.0039	-3.23032	-1.99231	-0.201666	Gpr37	G protein-coupled receptor 37
1422590_at	0.102964	0.0039	3.23031	-1.99232	0.125896	Cdk5	cyclin-dependent kinase 5
1428777_at	0.103059	0.00391	3.22967	-1.9937	0.163733	Spred1	sprouty protein with EVH-1 domain 1, related sequence
1448620_at	0.103098	0.00392	3.22901	-1.99514	0.141561	Fcgr3	Fc receptor, IgG, low affinity III
1434868_at	0.103098	0.00392	-3.22892	-1.99533	-0.150539	4933431E20Rik	RIKEN cDNA 4933431E20 gene
1455398_at	0.103254	0.00393	3.22756	-1.99826	0.183264	Lrrc8c	leucine rich repeat containing 8 family, member C
1431450_at	0.103254	0.00393	3.22756	-1.99827	0.175829	4930444P10Rik	RIKEN cDNA 4930444P10 gene
1443952_at	0.103254	0.00393	-3.22737	-1.99866	-0.153269	Thra	thyroid hormone receptor alpha
1455122_at	0.103409	0.00394	3.22624	-2.00111	0.156974	Ptchd2	patched domain containing 2
1456697_x_at	0.103433	0.00394	3.22589	-2.00185	0.206563	Dmtf1	cyclin D binding myb-like transcription factor 1
1460647_a_at	0.103485	0.00395	-3.22539	-2.00293	-0.179095	Nr2f6	nuclear receptor subfamily 2, group F, member 6
1421059_a_at	0.103485	0.00395	-3.22504	-2.0037	-0.154356	Alg2	asparagine-linked glycosylation 2 (alpha-1,3-mannosyltransferase)
1457494_at	0.103485	0.00395	-3.22494	-2.00392	-0.207739	Gm2136	predicted gene 2136
1452338_s_at	0.103508	0.00396	3.2246	-2.00465	0.15726	Itsn1	intersectin 1 (SH3 domain protein 1A)
1434011_a_at	0.103683	0.00397	-3.22363	-2.00674	-0.176175	Ints5	integrator complex subunit 5
1449586_at	0.103952	0.00398	3.22228	-2.00965	0.186826	Pkp1	plakophilin 1
1428542_at	0.104068	0.00398	-3.22156	-2.01121	-0.150246	Eif1ad	eukaryotic translation initiation factor 1A domain containing
1435743_at	0.10414	0.00399	-3.22101	-2.01238	-0.147131	Klhl23	kelch-like 23
1432293_at	0.104359	0.004	3.21987	-2.01484	0.174456	4930579G18Rik	RIKEN cDNA 4930579G18 gene
1460600_at	0.104365	0.004	-3.2196	-2.01543	-0.155544	AA414768	expressed sequence AA414768
1445565_at	0.10454	0.00402	3.21834	-2.01816	0.300424	Hist1h2bg///Hist1h2be///Hist1h2bc	histone cluster 1, H2bg///histone cluster 1, H2be///histone cluster 1, H2bc
1422786_at	0.10454	0.00402	-3.21781	-2.01929	-0.179214	Slc30a1	solute carrier family 30 (zinc transporter), member 1
1428525_at	0.10454	0.00402	3.2177	-2.01952	0.146881	4930488B01Rik///Pnmal1	RIKEN cDNA 4930488B01 gene///PNMA-like 1
1434702_at	0.10454	0.00402	-3.21758	-2.01978	-0.154742	Ddrgk1	DDRGK domain containing 1
1424780_a_at	0.10454	0.00402	-3.21741	-2.02015	-0.19236	Reep3	receptor accessory protein 3
1438164_x_at	0.104615	0.00403	-3.21656	-2.02198	-0.153886	Flot2	flotillin 2
1436428_at	0.104615	0.00403	-3.21637	-2.02239	-0.152215	Chrnb2	cholinergic receptor, nicotinic, beta polypeptide 2 (neuronal)
1432391_at	0.105139	0.00406	3.21356	-2.02844	0.165828	Cep85	centrosomal protein 85
1428667_at	0.105139	0.00406	-3.21351	-2.02857	-0.150106	Maoa	monoamine oxidase A
1435631_x_at	0.105293	0.00407	-3.21247	-2.03079	-0.194392	Exoc6///Sh3glb1	exocyst complex component 6///SH3-domain GRB2-like B1 (endophilin)
1449623_at	0.105293	0.00407	-3.21239	-2.03096	-0.232429	Txnrd3	thioredoxin reductase 3
1416708_a_at	0.105469	0.00408	-3.21144	-2.03303	-0.155789	Gramd1a	GRAM domain containing 1A
1436375_at	0.105504	0.00408	3.21105	-2.03385	0.170228	Srbd1	S1 RNA binding domain 1
1448546_at	0.105539	0.00409	-3.21064	-2.03473	-0.195779	Rassf3	Ras association (RalGDS/AF-6) domain family member 3
1455118_at	0.105539	0.00409	-3.21042	-2.03521	-0.163398	Tcaim	T cell activation inhibitor, mitochondrial
1448028_at	0.105842	0.0041	-3.20895	-2.03837	-0.161093	Tbc1d24	TBC1 domain family, member 24
1453386_at	0.105942	0.00411	-3.20831	-2.03976	-0.129019	Tusc1	tumor suppressor candidate 1
1418072_at	0.105975	0.00411	3.20793	-2.04057	0.191155	Hist1h2bg///Hist1h2be///Hist1h2bc	histone cluster 1, H2bg///histone cluster 1, H2be///histone cluster 1, H2bc
1452123_s_at	0.106066	0.00412	-3.20732	-2.04189	-0.17148	Frmd4b	FERM domain containing 4B
1455855_x_at	0.106251	0.00413	-3.20609	-2.04454	-0.157923	Hnrnpab	heterogeneous nuclear ribonucleoprotein A/B
1450300_at	0.106273	0.00414	3.20551	-2.0458	0.164549	Gabrr1	gamma-aminobutyric acid (GABA) C receptor, subunit rho 1
1437087_at	0.106273	0.00414	-3.2049	-2.0471	-0.15647	2210408K08Rik	RIKEN cDNA 2210408K08 gene
1458119_at	0.106273	0.00414	3.2049	-2.04711	0.175372	Slc25a27	solute carrier family 25, member 27
1447788_s_at	0.106273	0.00415	-3.20469	-2.04755	-0.176376	Tspyl3	TSPY-like 3
1428325_at	0.106273	0.00415	3.20409	-2.04885	0.168785	Cnpy4	canopy FGF signaling regulator 4
1421829_at	0.106273	0.00415	3.20407	-2.0489	0.19248	Ak4	adenylate kinase 4
1438094_x_at	0.106273	0.00415	-3.20406	-2.04891	-0.156159	Ola1	Obg-like ATPase 1
1435200_at	0.106316	0.00416	-3.20365	-2.0498	-0.182112	Smim10l2a	small integral membrane protein 10 like 2A
1442079_at	0.106364	0.00416	3.20311	-2.05096	0.17032	Sgms1	sphingomyelin synthase 1
1429861_at	0.106364	0.00416	-3.20297	-2.05125	-0.181756	Pcdh9	protocadherin 9
1433945_at	0.106457	0.00417	-3.20236	-2.05258	-0.23991	Fam189a1	family with sequence similarity 189, member A1
1429896_at	0.106517	0.00417	-3.20188	-2.05361	-0.22365	5830408B19Rik	RIKEN cDNA 5830408B19 gene
1436153_a_at	0.106527	0.00418	-3.2016	-2.05422	-0.211922	Zmynd11	zinc finger, MYND domain containing 11
1451692_at	0.106563	0.00418	3.20121	-2.05506	0.153823	Tmco6	transmembrane and coiled-coil domains 6
1426783_at	0.106653	0.00419	-3.20041	-2.05678	-0.19395	Kat2a	K(lysine) acetyltransferase 2A
1434564_at	0.106653	0.00419	-3.20012	-2.0574	-0.162708	E2f3	E2F transcription factor 3
1434785_at	0.106653	0.00419	-3.20002	-2.0576	-0.205482	Cacng5	calcium channel, voltage-dependent, gamma subunit 5
1436495_s_at	0.106653	0.00419	-3.19988	-2.0579	-0.178501	Zfp260	zinc finger protein 260
1451415_at	0.106814	0.0042	3.19892	-2.05998	0.215007	1810011O10Rik	RIKEN cDNA 1810011O10 gene
1449980_a_at	0.106814	0.0042	-3.19876	-2.06032	-0.198602	Gabrd	gamma-aminobutyric acid (GABA) A receptor, subunit delta
1424202_at	0.106825	0.00421	3.19848	-2.06093	0.223405	Seh1l	SEH1-like (S. cerevisiae
1428446_at	0.106882	0.00421	-3.19801	-2.06194	-0.163791	Dync2li1	dynein cytoplasmic 2 light intermediate chain 1
1425428_at	0.106998	0.00422	3.19723	-2.06361	0.235962	Hif3a	hypoxia inducible factor 3, alpha subunit
1456354_at	0.106998	0.00422	-3.19706	-2.06397	-0.194038	Chrna4	cholinergic receptor, nicotinic, alpha polypeptide 4
1460289_at	0.107112	0.00423	-3.19637	-2.06546	-0.252214	Nrg3	neuregulin 3
1429274_at	0.107125	0.00423	-3.196	-2.06626	-0.208023	Lypd6b	LY6/PLAUR domain containing 6B
1431166_at	0.107125	0.00423	-3.19584	-2.0666	-0.185188	Chd1	chromodomain helicase DNA binding protein 1
1430532_at	0.107205	0.00424	3.19479	-2.06885	0.17722	Dym	dymeclin
1451558_at	0.107205	0.00424	-3.19468	-2.0691	-0.138816	Fbxw7	F-box and WD-40 domain protein 7
1423945_a_at	0.107205	0.00425	-3.19456	-2.06935	-0.134495	Pkig	protein kinase inhibitor, gamma
1419028_at	0.107368	0.00425	-3.19367	-2.07126	-0.190429	Arpp21	cyclic AMP-regulated phosphoprotein, 21
1417963_at	0.107378	0.00426	-3.1934	-2.07186	-0.167272	Pltp	phospholipid transfer protein
1460677_at	0.107497	0.00426	-3.19268	-2.07339	-0.139064	Spats2	spermatogenesis associated, serine-rich 2
1434621_at	0.107533	0.00427	3.1923	-2.07421	0.148241	Tmem204	transmembrane protein 204
1441097_at	0.107642	0.00427	3.19163	-2.07566	0.174799	Vangl1	vang-like 1 (van gogh, Drosophila)
1455328_at	0.108115	0.0043	3.18922	-2.08085	0.163955	Asic1	acid-sensing (proton-gated) ion channel 1
1440859_at	0.108115	0.0043	-3.18915	-2.08098	-0.142488	Akap6	A kinase (PRKA) anchor protein 6
1426884_at	0.108115	0.0043	3.18904	-2.08122	0.139273	Rmnd5a	required for meiotic nuclear division 5 homolog A
1423074_at	0.108123	0.0043	3.18877	-2.0818	0.143104	Lman2	lectin, mannose-binding 2
1419217_at	0.10826	0.00431	-3.18766	-2.08419	-0.174282	Sergef	secretion regulating guanine nucleotide exchange factor
1448249_at	0.10826	0.00432	3.18743	-2.08468	0.160391	Gpd1	glycerol-3-phosphate dehydrogenase 1 (soluble)
1424677_at	0.10826	0.00432	3.18729	-2.08499	0.163341	Cyp2j9	cytochrome P450, family 2, subfamily j, polypeptide 9
1418038_s_at	0.10826	0.00432	3.18728	-2.085	0.149439	Dusp19	dual specificity phosphatase 19
1435020_at	0.108274	0.00432	-3.18695	-2.08571	-0.188082	Klhdc2	kelch domain containing 2
1428763_at	0.108274	0.00432	3.18675	-2.08614	0.157681	Smug1	single-strand selective monofunctional uracil DNA glycosylase
1418572_x_at	0.108602	0.00434	3.18515	-2.08959	0.177268	Tnfrsf12a	tumor necrosis factor receptor superfamily, member 12a
1435347_at	0.108602	0.00434	-3.1849	-2.09013	-0.151959	Stau1	staufen (RNA binding protein) homolog 1 (Drosophila)
1424877_a_at	0.108602	0.00435	-3.18465	-2.09067	-0.15595	Alad	aminolevulinate, delta-, dehydratase
1449372_at	0.108602	0.00435	3.18437	-2.09126	0.20769	Dnajc3	DnaJ heat shock protein family (Hsp40) member C3
1434524_at	0.108602	0.00435	-3.1839	-2.09228	-0.145181	Eif2b3	eukaryotic translation initiation factor 2B, subunit 3
1416653_at	0.108602	0.00436	-3.18331	-2.09353	-0.158759	Stxbp3	syntaxin binding protein 3
1435688_at	0.108602	0.00436	3.18331	-2.09354	0.241429	Gm19935	predicted gene, 19935
1443255_s_at	0.108602	0.00436	3.1831	-2.09398	0.186682	Arhgap31	Rho GTPase activating protein 31
1454854_at	0.108602	0.00436	3.18307	-2.09405	0.173871	Slc51b	solute carrier family 51, beta subunit
1418187_at	0.108602	0.00436	3.18298	-2.09426	0.155087	Ramp2	receptor (calcitonin) activity modifying protein 2
1450164_at	0.108602	0.00436	-3.18286	-2.09451	-0.202813	Ascl1	achaete-scute family bHLH transcription factor 1
1423160_at	0.109138	0.00439	3.18025	-2.1001	0.169213	Spred1	sprouty protein with EVH-1 domain 1, related sequence
1423078_a_at	0.109138	0.00439	-3.18018	-2.10027	-0.178413	Msmo1	methylsterol monoxygenase 1
1451434_s_at	0.109138	0.00439	-3.17978	-2.10112	-0.232473	Gpatch8	G patch domain containing 8
1436138_at	0.109138	0.0044	-3.17973	-2.10124	-0.143132	Ttc19	tetratricopeptide repeat domain 19
1444427_at	0.109138	0.0044	3.17958	-2.10156	0.159338	Lipi	lipase, member I
1434036_at	0.109458	0.00441	-3.17806	-2.10481	-0.17566	Mtss1	metastasis suppressor 1
1440900_at	0.109458	0.00441	3.17786	-2.10525	0.216827	Gpr174	G protein-coupled receptor 174
1457567_at	0.109552	0.00442	3.17699	-2.10711	0.144675	Paip2b	poly(A) binding protein interacting protein 2B
1435440_at	0.109552	0.00443	-3.1767	-2.10774	-0.135846	Pdzd8	PDZ domain containing 8
1416607_at	0.109552	0.00443	-3.17655	-2.10805	-0.167942	4931406C07Rik	RIKEN cDNA 4931406C07 gene
1433544_at	0.109841	0.00444	-3.17506	-2.11125	-0.157467	Stradb	STE20-related kinase adaptor beta
1437872_at	0.109841	0.00444	3.17496	-2.11148	0.190641	Napepld	N-acyl phosphatidylethanolamine phospholipase D
1437076_at	0.109844	0.00445	-3.17462	-2.11221	-0.15983	A930017M01Rik	Smg-5 homolog, nonsense mediated mRNA decay factor pseudogene
1460575_at	0.109844	0.00445	-3.17448	-2.11251	-0.145685	Eif2a	eukaryotic translation initiation factor 2A
1450802_at	0.109944	0.00446	3.17385	-2.11385	0.189495	Prss28	protease, serine 28
1442061_at	0.109944	0.00446	3.17362	-2.11434	0.205448	Btbd7	BTB (POZ) domain containing 7
1426464_at	0.109948	0.00446	-3.17337	-2.11488	-0.186022	Nr1d1	nuclear receptor subfamily 1, group D, member 1
1444723_at	0.110093	0.00447	-3.17222	-2.11735	-0.155764	Fam212b	family with sequence similarity 212, member B
1416878_at	0.110093	0.00447	3.17217	-2.11745	0.199498	Mrpl51	mitochondrial ribosomal protein L51
1433586_at	0.110093	0.00447	-3.17211	-2.1176	-0.186948	Rgmb	repulsive guidance molecule family member B
1417184_s_at	0.110216	0.00449	3.17105	-2.11987	0.291506	Hbb-bt///Hbb-bs///Hbb-b2///Hbb-b1	hemoglobin, beta adult t chain///hemoglobin, beta adult s chain///hemoglobin, beta adult minor chain///hemoglobin, beta adult major chain
1421476_a_at	0.110216	0.00449	-3.17099	-2.11999	-0.218511	Cant1	calcium activated nucleotidase 1
1417740_at	0.110216	0.00449	3.17093	-2.12012	0.163509	Cdc37l1	cell division cycle 37-like 1
1438102_at	0.110238	0.00449	3.17061	-2.12081	0.219973	Senp8	SUMO/sentrin specific peptidase 8
1421403_at	0.111235	0.00453	3.16653	-2.12956	0.190788	Pi15	peptidase inhibitor 15
1434855_at	0.111285	0.00454	-3.16583	-2.13105	-0.152555	Amdhd2	amidohydrolase domain containing 2
1450155_at	0.111285	0.00454	3.16578	-2.13117	0.219798	Itga4	integrin alpha 4
1447879_x_at	0.111285	0.00454	-3.16545	-2.13188	-0.183461	Wdr6///Dalrd3	WD repeat domain 6///DALR anticodon binding domain containing 3
1435594_at	0.111285	0.00455	-3.16527	-2.13227	-0.153331	Atl2	atlastin GTPase 2
1420918_at	0.111285	0.00455	3.16516	-2.13249	0.171881	Sgk3	serum/glucocorticoid regulated kinase 3
1459177_at	0.111285	0.00455	3.16494	-2.13297	0.21691	AU015741	expressed sequence AU015741
1435904_at	0.111749	0.00457	3.16293	-2.13728	0.208807	Ago3	argonaute RISC catalytic subunit 3
1456538_at	0.111885	0.00458	3.16218	-2.1389	0.13199	Sdccag8	serologically defined colon cancer antigen 8
1455425_at	0.111922	0.00458	-3.16181	-2.13969	-0.194866	Tet1	tet methylcytosine dioxygenase 1
1419568_at	0.112291	0.0046	-3.16016	-2.14321	-0.234845	Mapk1	mitogen-activated protein kinase 1
1441878_s_at	0.112337	0.00461	-3.15976	-2.14408	-0.135237	Oxld1	oxidoreductase like domain containing 1
1434743_x_at	0.112393	0.00461	-3.15922	-2.14524	-0.245443	Rusc1	RUN and SH3 domain containing 1
1417701_at	0.112393	0.00461	-3.15908	-2.14553	-0.13652	Ppp1r14c	protein phosphatase 1, regulatory (inhibitor) subunit 14c
1419726_at	0.112453	0.00462	3.15856	-2.14665	0.180549	Adam18	a disintegrin and metallopeptidase domain 18
1427345_a_at	0.112453	0.00462	3.15839	-2.14701	0.40616	Sult1a1	sulfotransferase family 1A, phenol-preferring, member 1
1455109_at	0.112474	0.00462	-3.15808	-2.14768	-0.183354	Tbl1xr1	transducin (beta)-like 1X-linked receptor 1
1416423_x_at	0.112613	0.00463	-3.15732	-2.1493	-0.198724	Ssb	Sjogren syndrome antigen B
1434756_at	0.112663	0.00464	3.15674	-2.15055	0.16779	Fzd4	frizzled class receptor 4
1455189_at	0.112663	0.00464	-3.15667	-2.1507	-0.160531	Trim33	tripartite motif-containing 33
1458625_at	0.112727	0.00465	-3.15592	-2.15229	-0.187236	Dscam	Down syndrome cell adhesion molecule
1454837_at	0.112727	0.00465	-3.15586	-2.15243	-0.149887	Cln6	ceroid-lipofuscinosis, neuronal 6
1451325_at	0.112727	0.00465	-3.15573	-2.1527	-0.179442	Fyttd1	forty-two-three domain containing 1
1448310_at	0.11274	0.00465	-3.15546	-2.1533	-0.167943	Ick	intestinal cell kinase
1437908_a_at	0.113038	0.00467	-3.15398	-2.15645	-0.227107	Ergic1	endoplasmic reticulum-golgi intermediate compartment (ERGIC) 1
1450803_at	0.113038	0.00467	-3.15386	-2.15671	-0.17267	Ntf3	neurotrophin 3
1453078_at	0.113134	0.00468	-3.15327	-2.15797	-0.187525	Chmp1b///2610002M06Rik	charged multivesicular body protein 1B///RIKEN cDNA 2610002M06 gene
1423956_at	0.113186	0.00468	-3.15284	-2.15889	-0.178736	Smap1	small ArfGAP 1
1432351_at	0.113315	0.00469	3.15213	-2.16042	0.189559	9030625G05Rik	RIKEN cDNA 9030625G05 gene
1452860_at	0.113518	0.0047	-3.15111	-2.1626	-0.178807	Fbxl17	F-box and leucine-rich repeat protein 17
1435253_at	0.113518	0.0047	3.1509	-2.16305	0.169074	Rab11b	RAB11B, member RAS oncogene family
1459994_x_at	0.113632	0.00471	-3.14994	-2.1651	-0.202729	Tfr2	transferrin receptor 2
1455625_at	0.113632	0.00471	3.14981	-2.16539	0.213573	Taf10	TATA-box binding protein associated factor 10
1416554_at	0.113632	0.00471	3.14979	-2.16544	0.155477	Pdlim1	PDZ and LIM domain 1 (elfin)
1424949_at	0.113747	0.00472	-3.14903	-2.16706	-0.189941	Huwe1	HECT, UBA and WWE domain containing 1
1427003_at	0.113747	0.00472	-3.14889	-2.16735	-0.150883	Ppp2r5c	protein phosphatase 2, regulatory subunit B', gamma
1460719_a_at	0.113777	0.00473	3.14855	-2.16808	0.134725	P2rx1	purinergic receptor P2X, ligand-gated ion channel, 1
1416536_at	0.113858	0.00474	-3.14779	-2.1697	-0.142248	Mum1	melanoma associated antigen (mutated) 1
1416598_at	0.113858	0.00474	-3.14779	-2.16971	-0.158111	Glis2	GLIS family zinc finger 2
1424434_at	0.113875	0.00474	-3.14726	-2.17085	-0.191994	Mettl22	methyltransferase like 22
1429528_at	0.113875	0.00474	-3.14726	-2.17086	-0.180529	Rae1	ribonucleic acid export 1
1452210_at	0.113875	0.00475	3.14654	-2.17238	0.178792	Dna2	DNA replication helicase/nuclease 2
1447703_x_at	0.113875	0.00475	-3.14648	-2.17252	-0.216183	Zfp593	zinc finger protein 593
1456389_at	0.113875	0.00475	-3.14635	-2.17279	-0.197475	Zeb2	zinc finger E-box binding homeobox 2
1428705_at	0.113875	0.00475	3.14613	-2.17326	0.270842	1700007K13Rik	RIKEN cDNA 1700007K13 gene
1436332_at	0.113942	0.00476	-3.14531	-2.17501	-0.173267	Hspb6	heat shock protein, alpha-crystallin-related, B6
1459631_at	0.113942	0.00476	3.14528	-2.17509	0.160116	Gm21571///Rps12-ps18///Rps12-ps24///Rps12-ps10///Rps12-ps14///Rps12-ps13///Rps12-ps15///Rps12-ps12///Rps12-ps16///Rps12-ps11///Rps12	predicted gene, 21571///ribosomal protein S12, pseudogene 18///ribosomal protein S12, pseudogene 24///ribosomal protein S12, pseudogene 10///ribosomal protein S12, pseudogene 14///ribosomal protein S12, pseudogene 13///ribosomal protein S12, pseudogene 15///ribosomal protein S12, pseudogene 12///ribosomal protein S12, pseudogene 16///ribosomal protein S12, pseudogene 11///ribosomal protein S12
1431406_at	0.113942	0.00476	3.1452	-2.17526	0.394563	Etnppl	ethanolamine phosphate phospholyase
1422010_at	0.113945	0.00477	3.14496	-2.17577	0.236583	Tlr7	toll-like receptor 7
1439500_at	0.11419	0.00478	-3.14381	-2.17822	-0.133133	Scrn1	secernin 1
1443930_at	0.114362	0.00479	3.14294	-2.18009	0.213921	Zfp811	zinc finger protein 811
1422541_at	0.114537	0.0048	-3.14206	-2.18198	-0.20288	Ptprm	protein tyrosine phosphatase, receptor type, M
1432621_at	0.114568	0.00481	3.1414	-2.18339	0.164436	5730410E19Rik	RIKEN cDNA 5730410E19 gene
1417974_at	0.114568	0.00481	3.14126	-2.18368	0.172776	Kpna4	karyopherin (importin) alpha 4
1460700_at	0.11468	0.00482	3.14041	-2.18551	0.12722	Stat3	signal transducer and activator of transcription 3
1448263_a_at	0.11468	0.00482	-3.14039	-2.18554	-0.168713	Cndp2	CNDP dipeptidase 2 (metallopeptidase M20 family)
1460251_at	0.114682	0.00482	3.14016	-2.18604	0.197509	Fas	Fas (TNF receptor superfamily member 6)
1439264_x_at	0.114683	0.00482	-3.13993	-2.18653	-0.178553	Lasp1	LIM and SH3 protein 1
1431010_a_at	0.114709	0.00483	3.1396	-2.18723	0.192835	Rdh12	retinol dehydrogenase 12
1434516_at	0.115135	0.00485	-3.13756	-2.19159	-0.14897	Pstk	phosphoseryl-tRNA kinase
1436438_s_at	0.115201	0.00486	-3.13709	-2.1926	-0.154457	Dcaf5	DDB1 and CUL4 associated factor 5
1416731_at	0.115255	0.00486	-3.13667	-2.1935	-0.18823	Top2b	topoisomerase (DNA) II beta
1424845_a_at	0.11593	0.00489	-3.13369	-2.19986	-0.154769	Cep68	centrosomal protein 68
1450437_a_at	0.11593	0.0049	-3.13353	-2.2002	-0.151563	Ncam1	neural cell adhesion molecule 1
1418997_at	0.11593	0.0049	-3.13336	-2.20057	-0.281559	Lyrm5	LYR motif containing 5
1416623_at	0.11593	0.0049	-3.13319	-2.20095	-0.165237	Thbs3	thrombospondin 3
1425520_a_at	0.11593	0.0049	-3.13304	-2.20127	-0.17213	Dhdds	dehydrodolichyl diphosphate synthase
1459912_at	0.116081	0.00491	-3.13191	-2.20366	-0.153815	Map4k4	mitogen-activated protein kinase kinase kinase kinase 4
1440879_at	0.116081	0.00492	3.13161	-2.20432	0.189812	Abca9	ATP-binding cassette, sub-family A (ABC1), member 9
1424055_at	0.116081	0.00492	3.13156	-2.20442	0.154739	Ncoa5	nuclear receptor coactivator 5
1442050_at	0.116081	0.00492	-3.13135	-2.20486	-0.180457	Zfp608	zinc finger protein 608
1438205_at	0.116277	0.00493	-3.13038	-2.20695	-0.184981	Vps51	VPS51 GARP complex subunit
1452279_at	0.116277	0.00493	3.13018	-2.20736	0.216521	Cfp	complement factor properdin
1455261_at	0.116609	0.00495	3.12874	-2.21045	0.151892	Luc7l	Luc7-like
1446321_at	0.116841	0.00497	-3.12746	-2.21319	-0.211072	B230208B08Rik	RIKEN cDNA B230208B08 gene
1423412_at	0.116841	0.00497	3.12716	-2.21381	0.139399	Rbm47	RNA binding motif protein 47
1417351_a_at	0.116841	0.00497	-3.12705	-2.21405	-0.165314	Snrpa1	small nuclear ribonucleoprotein polypeptide A'
1433794_at	0.116841	0.00498	-3.12626	-2.21575	-0.139268	Setx	senataxin
1433922_at	0.116841	0.00498	-3.12613	-2.21603	-0.130527	Rab35	RAB35, member RAS oncogene family
1440886_at	0.116841	0.00499	3.12579	-2.21675	0.182484	Cdc37l1	cell division cycle 37-like 1
1417127_at	0.116841	0.00499	3.12563	-2.21709	0.169093	Msx1	msh homeobox 1
1417273_at	0.116841	0.00499	3.1255	-2.21737	0.206276	Pdk4	pyruvate dehydrogenase kinase, isoenzyme 4
1416467_at	0.116841	0.00499	-3.12544	-2.21749	-0.123258	Ddx3x	DEAD/H (Asp-Glu-Ala-Asp/His) box polypeptide 3, X-linked
1428633_at	0.116841	0.00499	-3.12543	-2.21752	-0.18209	Twistnb	twist basic helix-loop-helix transcription factor 1 neighbor
1436455_at	0.116894	0.005	-3.12489	-2.21867	-0.135627	Asph	aspartate-beta-hydroxylase
1417162_at	0.116894	0.005	-3.12478	-2.21889	-0.12883	Tmbim1	transmembrane BAX inhibitor motif containing 1
1421739_a_at	0.116894	0.005	-3.12445	-2.2196	-0.143083	Matk	megakaryocyte-associated tyrosine kinase
1425979_a_at	0.116894	0.005	3.12434	-2.21984	0.124855	Fbf1	Fas (TNFRSF6) binding factor 1
1454793_x_at	0.116984	0.00501	-3.12379	-2.22102	-0.236876	Ddx5	DEAD (Asp-Glu-Ala-Asp) box polypeptide 5
1459679_s_at	0.117126	0.00502	-3.12304	-2.22261	-0.274174	Myo1b	myosin IB
1428135_a_at	0.117181	0.00502	3.12262	-2.22351	0.207181	Eef1d	eukaryotic translation elongation factor 1 delta (guanine nucleotide exchange protein)
1452005_at	0.117187	0.00503	-3.12238	-2.22403	-0.196151	Dlat	dihydrolipoamide S-acetyltransferase (E2 component of pyruvate dehydrogenase complex)
1452659_at	0.117313	0.00503	-3.12169	-2.22549	-0.172444	Dek	DEK oncogene (DNA binding)
1449557_at	0.117637	0.00505	-3.12029	-2.22849	-0.160243	Yae1d1	Yae1 domain containing 1
1452675_at	0.117681	0.00505	-3.11991	-2.22931	-0.156392	Rbm22	RNA binding motif protein 22
1438665_at	0.117826	0.00506	-3.11916	-2.2309	-0.194151	Smpd3	sphingomyelin phosphodiesterase 3, neutral
1449488_at	0.118035	0.00508	3.11806	-2.23325	0.193868	Pitx1	paired-like homeodomain transcription factor 1
1434132_at	0.118102	0.00509	-3.11715	-2.23519	-0.129577	E430025E21Rik	RIKEN cDNA E430025E21 gene
1428886_at	0.118102	0.00509	3.11713	-2.23522	0.132273	Rbbp5	retinoblastoma binding protein 5
1454523_at	0.118102	0.00509	3.11704	-2.23541	0.193842	C530007A02Rik	RIKEN cDNA C530007A02 gene
1459127_at	0.118269	0.0051	3.11622	-2.23717	0.17738	Gm36365	predicted gene, 36365
1445186_at	0.118289	0.0051	3.11593	-2.2378	0.247742	Stc2	stanniocalcin 2
1436626_at	0.118335	0.00511	3.11494	-2.23991	0.140194	Tspan11	tetraspanin 11
1437294_at	0.118335	0.00511	-3.11477	-2.24026	-0.187769	Exosc10	exosome component 10
1428760_at	0.118335	0.00512	3.11476	-2.24028	0.145571	Snapc3	small nuclear RNA activating complex, polypeptide 3
1456336_at	0.118335	0.00512	-3.11439	-2.24107	-0.149093	Csrnp3	cysteine-serine-rich nuclear protein 3
1460236_at	0.118335	0.00512	3.11421	-2.24145	0.162553	Klk10	kallikrein related-peptidase 10
1453348_at	0.118378	0.00513	-3.11342	-2.24315	-0.213177	1700085D22Rik	RIKEN cDNA 1700085D22 gene
1451458_at	0.118378	0.00513	-3.1134	-2.24319	-0.197387	Tmem2	transmembrane protein 2
1436012_s_at	0.118464	0.00514	3.11286	-2.24433	0.193314	Scrn2	secernin 2
1417469_at	0.118464	0.00515	3.11224	-2.24566	0.15988	Nit1	nitrilase 1
1428441_at	0.118464	0.00515	-3.11221	-2.24572	-0.138896	Cisd2	CDGSH iron sulfur domain 2
1424062_at	0.118464	0.00515	-3.11206	-2.24605	-0.194098	Ube2d1	ubiquitin-conjugating enzyme E2D 1
1450073_at	0.118464	0.00515	3.11177	-2.24666	0.133697	Kif3b	kinesin family member 3B
1451355_at	0.118756	0.00517	3.11026	-2.24988	0.240517	Acer2	alkaline ceramidase 2
1422825_at	0.118756	0.00517	3.11014	-2.25014	0.164108	Cartpt	CART prepropeptide
1416841_at	0.118756	0.00517	-3.11006	-2.25031	-0.13769	1110059E24Rik	RIKEN cDNA 1110059E24 gene
1427891_at	0.118874	0.00518	3.10941	-2.25169	0.287378	Gimap6	GTPase, IMAP family member 6
1438969_x_at	0.119206	0.0052	-3.10799	-2.25471	-0.160971	Dhx30	DEAH (Asp-Glu-Ala-His) box polypeptide 30
1433935_at	0.119228	0.00521	-3.10725	-2.2563	-0.184395	AU020206	expressed sequence AU020206
1459268_at	0.119228	0.00521	3.10706	-2.25671	0.20249	Gpr179	G protein-coupled receptor 179
1450425_a_at	0.119228	0.00521	-3.10686	-2.25711	-0.146977	Gm9182///2700062C07Rik	predicted gene 9182///RIKEN cDNA 2700062C07 gene
1432956_at	0.119228	0.00521	3.10682	-2.2572	0.158075	4930444K16Rik	RIKEN cDNA 4930444K16 gene
1440819_s_at	0.119252	0.00521	-3.10652	-2.25785	-0.335775	Szt2	seizure threshold 2
1421886_at	0.119307	0.00522	-3.10591	-2.25915	-0.171763	Sos1	son of sevenless homolog 1 (Drosophila)
1417464_at	0.119307	0.00522	3.10588	-2.2592	0.196957	Tnnc2	troponin C2, fast
1456390_at	0.119362	0.00523	-3.10525	-2.26055	-0.158756	Ppp2ca	protein phosphatase 2 (formerly 2A), catalytic subunit, alpha isoform
1427207_s_at	0.1194	0.00524	-3.10443	-2.26229	-0.138978	Afg3l2	AFG3-like AAA ATPase 2
1436184_at	0.1194	0.00524	-3.10436	-2.26246	-0.149198	Zfp512b	zinc finger protein 512B
1441972_at	0.1194	0.00524	-3.10435	-2.26246	-0.203479	6230424C14Rik	RIKEN cDNA 6230424C14 gene
1456630_x_at	0.1194	0.00524	-3.10402	-2.26317	-0.272341	Son	Son DNA binding protein
1435809_at	0.1194	0.00525	-3.10394	-2.26334	-0.18188	Ankrd34a	ankyrin repeat domain 34A
1444953_at	0.1194	0.00525	3.10365	-2.26397	0.199802	Nucks1	nuclear casein kinase and cyclin-dependent kinase substrate 1
1431948_a_at	0.119527	0.00526	-3.10262	-2.26616	-0.118954	Pank2	pantothenate kinase 2
1424140_at	0.119527	0.00526	-3.10238	-2.26667	-0.160984	Gale	galactose-4-epimerase, UDP
1452244_at	0.119527	0.00527	-3.10228	-2.26688	-0.154012	Medag	mesenteric estrogen dependent adipogenesis
1423915_at	0.119527	0.00527	3.10227	-2.2669	0.199225	Olfml2b	olfactomedin-like 2B
1440226_at	0.11955	0.00527	3.10197	-2.26753	0.150586	Zfp760	zinc finger protein 760
1438212_at	0.119814	0.00529	3.1006	-2.27046	0.231637	Usp37	ubiquitin specific peptidase 37
1448461_a_at	0.119814	0.00529	-3.10059	-2.27048	-0.157017	Thoc7	THO complex 7
1441339_at	0.120074	0.0053	3.09945	-2.27291	0.219466	Chd9	chromodomain helicase DNA binding protein 9
1425270_at	0.120161	0.00531	3.09892	-2.27404	0.280953	Kif1b	kinesin family member 1B
1428402_at	0.120321	0.00532	-3.09791	-2.27618	-0.19611	Zcchc3	zinc finger, CCHC domain containing 3
1415831_at	0.120321	0.00532	-3.09776	-2.2765	-0.113674	Psmd2	proteasome (prosome, macropain) 26S subunit, non-ATPase, 2
1434221_at	0.120321	0.00532	3.09769	-2.27666	0.258997	Mical3	microtubule associated monooxygenase, calponin and LIM domain containing 3
1444441_at	0.120321	0.00532	-3.09748	-2.27709	-0.191012	Rapgefl1	Rap guanine nucleotide exchange factor (GEF)-like 1
1452911_at	0.12035	0.00533	3.09701	-2.27809	0.214606	Spred1	sprouty protein with EVH-1 domain 1, related sequence
1438180_x_at	0.12035	0.00533	3.09695	-2.27823	0.165429	Hax1	HCLS1 associated X-1
1435158_at	0.120358	0.00533	3.0967	-2.27875	0.255985	Rbm12b1	RNA binding motif protein 12 B1
1456728_x_at	0.120402	0.00534	-3.09633	-2.27954	-0.234059	Aco1	aconitase 1
1451627_a_at	0.120461	0.00535	3.09586	-2.28054	0.153907	Slc1a2	solute carrier family 1 (glial high affinity glutamate transporter), member 2
1459179_at	0.120461	0.00535	3.09569	-2.28091	0.136749	D8Ertd268e	DNA segment, Chr 8, ERATO Doi 268, expressed
1423016_a_at	0.120745	0.00536	3.09442	-2.28361	0.172419	Gypa	glycophorin A
1459051_at	0.120745	0.00537	-3.09425	-2.28397	-0.128103	Fam212b	family with sequence similarity 212, member B
1420708_at	0.120791	0.00537	3.09387	-2.28478	0.165327	Traip	TRAF-interacting protein
1456168_at	0.120952	0.00538	3.09308	-2.28646	0.142308	Ccnjl	cyclin J-like
1415779_s_at	0.121042	0.00539	-3.09241	-2.28788	-0.12479	Actg1	actin, gamma, cytoplasmic 1
1428110_x_at	0.121042	0.00539	-3.092	-2.28876	-0.152728	Vps11	VPS11, CORVET/HOPS core subunit
1424217_at	0.121042	0.00539	3.09189	-2.289	0.212073	Papola	poly (A) polymerase alpha
1422062_at	0.121042	0.0054	3.09164	-2.28952	0.171315	Msr1	macrophage scavenger receptor 1
1451984_at	0.121042	0.0054	-3.0915	-2.28982	-0.150588	Hnrnpul1	heterogeneous nuclear ribonucleoprotein U-like 1
1440455_at	0.121042	0.00541	3.0906	-2.29173	0.172321	Camk2n1	calcium/calmodulin-dependent protein kinase II inhibitor 1
1416343_a_at	0.121042	0.00541	-3.09056	-2.29183	-0.249712	Lamp2	lysosomal-associated membrane protein 2
1423335_at	0.121042	0.00541	-3.09039	-2.29218	-0.13425	1110004F10Rik	RIKEN cDNA 1110004F10 gene
1457354_at	0.121042	0.00541	-3.09037	-2.29222	-0.267868	Krt222	keratin 222
1433602_at	0.121042	0.00542	-3.09018	-2.29263	-0.244103	Gabra5	gamma-aminobutyric acid (GABA) A receptor, subunit alpha 5
1435805_at	0.121042	0.00542	-3.0899	-2.29323	-0.163481	Lin7a	lin-7 homolog A (C. elegans)
1438040_a_at	0.121042	0.00542	3.08966	-2.29373	0.183156	Hsp90b1	heat shock protein 90, beta (Grp94), member 1
1423574_s_at	0.121042	0.00542	-3.08956	-2.29395	-0.173442	Srd5a3	steroid 5 alpha-reductase 3
1433742_at	0.121042	0.00542	3.08949	-2.29411	0.180485	Kank1	KN motif and ankyrin repeat domains 1
1445496_at	0.121042	0.00543	3.08934	-2.29441	0.192433	Auh	AU RNA binding protein/enoyl-coenzyme A hydratase
1423278_at	0.121342	0.00544	-3.08806	-2.29713	-0.174752	Ptprk	protein tyrosine phosphatase, receptor type, K
1429901_at	0.121537	0.00545	-3.08716	-2.29905	-0.168795	Nkain2	Na+/K+ transporting ATPase interacting 2
1428405_at	0.121652	0.00546	-3.08654	-2.30037	-0.143373	Hcfc1r1	host cell factor C1 regulator 1 (XPO1-dependent)
1430219_at	0.121789	0.00547	-3.08585	-2.30184	-0.172586	Aktip	thymoma viral proto-oncogene 1 interacting protein
1454015_a_at	0.12182	0.00548	-3.08538	-2.30285	-0.308922	Cdh13	cadherin 13
1455310_at	0.12182	0.00548	-3.0851	-2.30343	-0.218025	Scaf8	SR-related CTD-associated factor 8
1421197_a_at	0.121834	0.00548	3.08484	-2.30399	0.168802	Acin1	apoptotic chromatin condensation inducer 1
1445510_at	0.121953	0.0055	3.08393	-2.30592	0.145532	C79601	expressed sequence C79601
1451208_at	0.121953	0.0055	-3.08393	-2.30592	-0.172676	Etf1	eukaryotic translation termination factor 1
1432545_at	0.121953	0.0055	3.0837	-2.3064	0.146557	Dcst1	DC-STAMP domain containing 1
1429812_at	0.121953	0.0055	3.08357	-2.30668	0.152164	Aunip	aurora kinase A and ninein interacting protein
1433730_at	0.122099	0.00551	3.08284	-2.30823	0.142715	Elmod2	ELMO/CED-12 domain containing 2
1457253_at	0.1221	0.00551	3.08257	-2.30881	0.233106	Trim40	tripartite motif-containing 40
1452049_at	0.1221	0.00552	3.08221	-2.30956	0.147789	Rpl7l1	ribosomal protein L7-like 1
1436770_x_at	0.1221	0.00552	-3.08221	-2.30958	-0.190786	Psma1	proteasome (prosome, macropain) subunit, alpha type 1
1432571_at	0.122373	0.00554	3.08073	-2.31272	0.177643	Oaz3	ornithine decarboxylase antizyme 3
1417209_at	0.122373	0.00554	-3.08069	-2.31281	-0.196409	Sertad2	SERTA domain containing 2
1426765_at	0.122514	0.00555	3.07961	-2.31509	0.134556	Commd7	COMM domain containing 7
1416085_s_at	0.122514	0.00555	-3.07948	-2.31537	-0.166129	Zfand5	zinc finger, AN1-type domain 5
1444710_at	0.122514	0.00555	3.07948	-2.31538	0.16205	Gm19589	predicted gene, 19589
1447474_at	0.122514	0.00556	3.07927	-2.31582	0.21797	Ramp1	receptor (calcitonin) activity modifying protein 1
1448311_at	0.122981	0.00558	-3.07721	-2.32018	-0.117285	Usp5	ubiquitin specific peptidase 5 (isopeptidase T)
1452332_at	0.122981	0.00558	-3.07721	-2.32019	-0.175132	Ccdc85a	coiled-coil domain containing 85A
1429642_at	0.123193	0.00559	-3.07626	-2.32221	-0.295076	Zfand4	zinc finger, AN1-type domain 4
1449703_at	0.123205	0.0056	3.07601	-2.32275	0.206277	Zfand2a	zinc finger, AN1-type domain 2A
1431731_at	0.123239	0.0056	-3.07568	-2.32345	-0.145934	Bnip2	BCL2/adenovirus E1B interacting protein 2
1453781_at	0.123241	0.0056	3.07546	-2.32391	0.159746	Gm8539///Zbtb8os	predicted gene 8539///zinc finger and BTB domain containing 8 opposite strand
1424200_s_at	0.123419	0.00562	-3.07421	-2.32656	-0.162774	Seh1l	SEH1-like (S. cerevisiae
1456015_x_at	0.123671	0.00563	-3.07312	-2.32887	-0.11706	Ndufv1	NADH dehydrogenase (ubiquinone) flavoprotein 1
1422342_at	0.123757	0.00564	3.07261	-2.32996	0.160778	Nmbr	neuromedin B receptor
1445383_at	0.123763	0.00565	3.07225	-2.33071	0.161539	Tmem44	transmembrane protein 44
1455188_at	0.123763	0.00565	-3.07208	-2.33109	-0.145014	Ephb1	Eph receptor B1
1448133_at	0.123763	0.00565	-3.07192	-2.33142	-0.170539	Nmd3	NMD3 ribosome export adaptor
1431491_at	0.123763	0.00565	3.07175	-2.33178	0.230636	9430087N24Rik	RIKEN cDNA 9430087N24 gene
1436575_at	0.123953	0.00566	-3.07088	-2.33362	-0.149493	Grin3a	glutamate receptor ionotropic, NMDA3A
1454680_at	0.12419	0.00568	-3.06968	-2.33618	-0.131252	D5Ertd579e	DNA segment, Chr 5, ERATO Doi 579, expressed
1453039_at	0.12419	0.00568	-3.06964	-2.33626	-0.193469	Zfp335	zinc finger protein 335
1428361_x_at	0.124445	0.0057	3.06834	-2.33902	0.216766	Hba-a2///Hba-a1	hemoglobin alpha, adult chain 2///hemoglobin alpha, adult chain 1
1456231_at	0.124492	0.0057	3.06797	-2.33981	0.206827	Pla2g3	phospholipase A2, group III
1436066_at	0.12464	0.00571	-3.06725	-2.34134	-0.151034	Kalrn	kalirin, RhoGEF kinase
1452092_at	0.124646	0.00572	-3.06702	-2.34182	-0.110993	Chst15	carbohydrate (N-acetylgalactosamine 4-sulfate 6-O) sulfotransferase 15
1452636_x_at	0.124651	0.00572	3.06662	-2.34266	0.129552	Mtg2	mitochondrial ribosome associated GTPase 2
1435746_at	0.124651	0.00572	-3.06659	-2.34274	-0.166168	Srpk2	serine/arginine-rich protein specific kinase 2
1441936_x_at	0.124735	0.00573	-3.06599	-2.34401	-0.212148	4930447M23Rik	RIKEN cDNA 4930447M23 gene
1419686_at	0.124735	0.00573	3.06588	-2.34424	0.179974	Cep41	centrosomal protein 41
1456541_x_at	0.124765	0.00573	-3.06556	-2.34491	-0.204902	Atad3a	ATPase family, AAA domain containing 3A
1439172_at	0.124923	0.00575	-3.06474	-2.34665	-0.186262	Atp13a5	ATPase type 13A5
1417935_at	0.124923	0.00575	-3.06458	-2.347	-0.124722	Mkrn2	makorin, ring finger protein, 2
1423931_s_at	0.124923	0.00575	-3.0644	-2.34738	-0.14041	Anapc4	anaphase promoting complex subunit 4
1457306_at	0.124989	0.00576	3.06396	-2.3483	0.185608	Alad	aminolevulinate, delta-, dehydratase
1444602_at	0.125101	0.00576	-3.06337	-2.34956	-0.134642	Ophn1	oligophrenin 1
1417128_at	0.125173	0.00578	-3.06243	-2.35156	-0.193044	Plekho1	pleckstrin homology domain containing, family O member 1
1424903_at	0.125173	0.00579	-3.0616	-2.35332	-0.182684	Kdm5d	lysine (K)-specific demethylase 5D
1422279_at	0.125173	0.00579	3.06157	-2.35337	0.211136	Fv1	Friend virus susceptibility 1
1417329_at	0.125173	0.00579	-3.06155	-2.35342	-0.123933	Slc23a2	solute carrier family 23 (nucleobase transporters), member 2
1453109_at	0.125173	0.00579	3.06119	-2.35417	0.136339	Arsk	arylsulfatase K
1430336_at	0.125173	0.00579	-3.06112	-2.35434	-0.15253	Gucy2g	guanylate cyclase 2g
1433914_at	0.125173	0.0058	-3.061	-2.35458	-0.194266	Lipo3	lipase, member O3
1427229_at	0.125173	0.0058	-3.06085	-2.3549	-0.155133	Hmgcr	3-hydroxy-3-methylglutaryl-Coenzyme A reductase
1455207_at	0.125173	0.0058	-3.06084	-2.35492	-0.157667	Ptrhd1	peptidyl-tRNA hydrolase domain containing 1
1456424_s_at	0.125188	0.0058	-3.06058	-2.35546	-0.20975	Pltp	phospholipid transfer protein
1452981_at	0.125198	0.0058	-3.06034	-2.35598	-0.138692	Cntn1	contactin 1
1429217_at	0.12542	0.00582	-3.05937	-2.35803	-0.159568	Zfp655	zinc finger protein 655
1417846_at	0.125459	0.00582	-3.05903	-2.35876	-0.132636	Ulk2	unc-51 like kinase 2
1444046_at	0.125478	0.00583	3.05864	-2.35958	0.223996	Shisa7	shisa family member 7
1419346_a_at	0.125478	0.00583	3.05856	-2.35976	0.224662	Svs5	seminal vesicle secretory protein 5
1420011_s_at	0.125566	0.00584	3.05784	-2.36128	0.215766	Xbp1	X-box binding protein 1
1428117_x_at	0.125683	0.00585	3.05723	-2.36256	0.173743	Dynlt1f	dynein light chain Tctex-type 1F
1459304_at	0.125787	0.00585	3.05667	-2.36375	0.222309	A730054J21Rik	RIKEN cDNA A730054J21 gene
1417672_at	0.125857	0.00586	-3.05608	-2.36501	-0.141731	Slc4a10	solute carrier family 4, sodium bicarbonate cotransporter-like, member 10
1445261_at	0.125857	0.00586	3.05602	-2.36514	0.1607	D17Ertd763e	DNA segment, Chr 17, ERATO Doi 763, expressed
1436165_at	0.126109	0.00588	-3.05495	-2.3674	-0.151893	Luc7l2	LUC7-like 2 (S. cerevisiae)
1438676_at	0.126137	0.00588	-3.05465	-2.36804	-0.140752	Gbp6	guanylate binding protein 6
1434643_at	0.126181	0.00589	-3.05429	-2.36879	-0.153798	Tbl1x	transducin (beta)-like 1 X-linked
1434826_at	0.126284	0.00589	-3.05374	-2.36997	-0.162248	Rfesd	Rieske (Fe-S) domain containing
1437379_x_at	0.126634	0.00591	-3.05234	-2.37294	-0.146943	Trap1	TNF receptor-associated protein 1
1435250_at	0.126676	0.00592	3.05199	-2.37367	0.16497	Ints8	integrator complex subunit 8
1450880_at	0.12698	0.00594	-3.05051	-2.37681	-0.138455	Mrpl16	mitochondrial ribosomal protein L16
1424939_at	0.12698	0.00594	3.05048	-2.37687	0.176782	Asz1	ankyrin repeat, SAM and basic leucine zipper domain containing 1
1449523_at	0.12698	0.00594	-3.05034	-2.37716	-0.145329	Bcl7c	B cell CLL/lymphoma 7C
1442917_at	0.127063	0.00595	3.04968	-2.37856	0.181523	Gm11627	predicted gene 11627
1431689_at	0.127063	0.00596	3.04922	-2.37953	0.17929	5830400J07Rik	RIKEN cDNA 5830400J07 gene
1452118_at	0.127063	0.00596	3.04914	-2.3797	0.128881	Rrp1b	ribosomal RNA processing 1 homolog B (S. cerevisiae)
[truncated: 37,861 more rows]

## Sheet: GSE9442
ID	adj.P.Val	P.Value	t	B	logFC	Gene.symbol	Gene.title
1418937_at	8.95e-08	1.98e-12	11.5611	17.2504	0.61832	Dio2	deiodinase, iodothyronine, type II
1437247_at	5.83e-06	2.59e-10	9.37284	13.0721	0.809337	Fosl2	fos-like antigen 2
1425671_at	1.58e-05	1.32e-09	8.69762	11.6326	0.692295	Homer1	homer scaffolding protein 1
1422168_a_at	1.58e-05	1.4e-09	8.67199	11.5765	0.501823	Bdnf	brain derived neurotrophic factor
1417262_at	1.58e-05	1.75e-09	8.58104	11.3768	0.720765	Ptgs2	prostaglandin-endoperoxide synthase 2
1424638_at	3.06e-05	4.07e-09	8.24315	10.6232	0.694008	Cdkn1a	cyclin-dependent kinase inhibitor 1A (P21)
1426081_a_at	4.23e-05	6.65e-09	8.04899	10.1822	0.43573	Dio2	deiodinase, iodothyronine, type II
1434228_at	4.23e-05	7.5e-09	8.00168	10.0739	0.343339	Pdp1	pyruvate dehyrogenase phosphatase catalytic subunit 1
1457984_at	7.15e-05	1.49e-08	7.73242	9.45081	0.476299	Crh	corticotropin releasing hormone
1435854_at	7.15e-05	1.58e-08	-7.70978	9.39792	-0.690862	Opalin	oligodendrocytic myelin paranodal and inner loop protein
1437418_at	0.000147	4.52e-08	7.30781	8.44652	0.389986	Gm3515	predicted gene 3515
1417263_at	0.000147	4.55e-08	7.30488	8.4395	0.495935	Ptgs2	prostaglandin-endoperoxide synthase 2
1450436_s_at	0.000147	4.58e-08	7.30225	8.4332	0.377216	Dnajb5	DnaJ heat shock protein family (Hsp40) member B5
1436105_at	0.000147	5.32e-08	-7.24539	8.2967	-0.40999	Ccdc74a	coiled-coil domain containing 74A
1427464_s_at	0.000147	5.43e-08	7.23818	8.27936	0.688255	Hspa5	heat shock protein 5
1436329_at	0.000147	5.54e-08	7.23035	8.26053	0.514836	Egr3	early growth response 3
1421679_a_at	0.000191	7.77e-08	7.1027	7.95223	0.463303	Cdkn1a	cyclin-dependent kinase inhibitor 1A (P21)
1448967_at	0.000191	8.03e-08	-7.08995	7.92133	-0.266421	Nipsnap3b	nipsnap homolog 3B (C. elegans)
1436387_at	0.000192	8.81e-08	7.05501	7.8365	1.39397	Homer1	homer scaffolding protein 1
1456161_at	0.000192	9.11e-08	-7.04258	7.80627	-0.544118	0610040B10Rik	RIKEN cDNA 0610040B10 gene
1419231_s_at	0.000246	1.26e-07	-6.9219	7.51187	-0.434405	Krt12	keratin 12
1428112_at	0.000251	1.34e-07	6.89894	7.45563	0.601886	Manf	mesencephalic astrocyte-derived neurotrophic factor
1452091_a_at	0.000371	2.11e-07	6.72936	7.03827	0.371363	Rbm28	RNA binding motif protein 28
1435418_at	0.000371	2.14e-07	-6.72434	7.02586	-0.446395	Slc22a8	solute carrier family 22 (organic anion transporter), member 8
1442077_at	0.000392	2.35e-07	6.68906	6.93857	0.358876	2310076G05Rik///Htr1b	RIKEN cDNA 2310076G05 gene///5-hydroxytryptamine (serotonin) receptor 1B
1428834_at	0.000395	2.45e-07	6.67327	6.89944	0.529919	Dusp4	dual specificity phosphatase 4
1439503_at	0.000415	2.73e-07	-6.63353	6.80086	-0.312653	Zfp28	zinc finger protein 28
1420011_s_at	0.000415	2.82e-07	6.62178	6.77166	0.526558	Xbp1	X-box binding protein 1
1421594_a_at	0.000415	2.89e-07	-6.61239	6.74835	-0.377848	Sytl2	synaptotagmin-like 2
1443934_at	0.000415	2.94e-07	6.60554	6.7313	0.33197	9230110C19Rik	RIKEN cDNA 9230110C19 gene
1440361_at	0.000429	3.14e-07	-6.58161	6.67178	-0.412167	Gm12371	predicted gene 12371
1416811_s_at	0.000444	3.35e-07	6.55782	6.61252	0.437679	Ctla2b///Ctla2a	cytotoxic T lymphocyte-associated protein 2 beta///cytotoxic T lymphocyte-associated protein 2 alpha
1454558_at	0.000504	3.91e-07	-6.50077	6.47019	-0.295441	5430416B10Rik	RIKEN cDNA 5430416B10 gene
1416064_a_at	0.000538	4.3e-07	6.46613	6.38357	0.614658	Hspa5	heat shock protein 5
1423841_at	0.00056	4.59e-07	6.44146	6.32181	0.381918	Brix1	BRX1, biogenesis of ribosomes
1421818_at	0.000587	5e-07	6.41053	6.24428	0.322918	Bcl6	B cell leukemia/lymphoma 6
1455007_s_at	0.000587	5.07e-07	6.40516	6.23082	0.40145	Gpt2	glutamic pyruvate transaminase (alanine aminotransferase) 2
1422860_at	0.000606	5.43e-07	6.38024	6.16826	0.335808	Nts	neurotensin
1425993_a_at	0.000606	5.51e-07	6.3751	6.15535	0.34085	Hsph1	heat shock 105kDa/110kDa protein 1
1438026_at	0.00063	6.11e-07	-6.33667	6.05875	-0.28979	Zfp560	zinc finger protein 560
1423161_s_at	0.00063	6.15e-07	6.33466	6.0537	0.322569	Spred1	sprouty protein with EVH-1 domain 1, related sequence
1427410_at	0.000654	6.52e-07	6.3129	5.99893	0.477187	Dleu2	deleted in lymphocytic leukemia, 2
1421768_a_at	0.000681	6.94e-07	6.29014	5.94158	0.345678	Homer1	homer scaffolding protein 1
1452094_at	0.000736	7.67e-07	6.25382	5.84995	0.445835	P4ha1	procollagen-proline, 2-oxoglutarate 4-dioxygenase (proline 4-hydroxylase), alpha 1 polypeptide
1428958_at	0.000746	7.93e-07	6.24136	5.81849	0.313765	Paqr8	progestin and adipoQ receptor family member VIII
1419874_x_at	0.000757	8.22e-07	6.22828	5.78546	0.441062	Zbtb16	zinc finger and BTB domain containing 16
1437868_at	0.00079	8.76e-07	6.20536	5.72753	0.424073	Fam46a	family with sequence similarity 46, member A
1423146_at	0.000849	9.6e-07	-6.17169	5.64231	-0.311703	Hes5	hairy and enhancer of split 5 (Drosophila)
1434202_a_at	0.000862	9.93e-07	6.15935	5.61107	0.302692	Fam107a	family with sequence similarity 107, member A
1435374_at	0.000866	1.02e-06	6.14876	5.58423	0.291073	Cdyl2	chromodomain protein, Y chromosome-like 2
1457472_at	0.000866	1.04e-06	6.14363	5.57123	0.393543	Gigyf2	GRB10 interacting GYF protein 2
1454014_a_at	0.000936	1.18e-06	6.09583	5.44994	0.484531	Mkks	McKusick-Kaufman syndrome
1457279_at	0.000936	1.19e-06	-6.09229	5.44096	-0.299974	Gm17586	predicted gene, 17586
1416332_at	0.000936	1.2e-06	-6.09023	5.43572	-0.727152	Cirbp	cold inducible RNA binding protein
1434595_at	0.000936	1.2e-06	6.08958	5.43407	0.36916	Trim9	tripartite motif-containing 9
1442220_at	0.000984	1.29e-06	6.06512	5.37194	0.310669	Gm36343	predicted gene, 36343
1435172_at	0.000992	1.33e-06	6.05457	5.34512	0.311013	Eomes	eomesodermin
1449039_a_at	0.000992	1.34e-06	-6.04967	5.33265	-0.348137	Hnrnpdl	heterogeneous nuclear ribonucleoprotein D-like
1418472_at	0.000992	1.36e-06	-6.04419	5.3187	-0.288603	Aspa	aspartoacylase
1434203_at	0.00102	1.42e-06	6.0297	5.28185	0.322045	Fam107a	family with sequence similarity 107, member A
1435171_at	0.00102	1.45e-06	-6.02265	5.26389	-0.461851	LOC102642487	uncharacterized LOC102642487
1448397_at	0.00102	1.48e-06	6.01404	5.24198	0.403594	Gjb6	gap junction protein, beta 6
1423795_at	0.00102	1.5e-06	6.00987	5.23136	0.462308	Sfpq	splicing factor proline/glutamine rich (polypyrimidine tract binding protein associated)
1434637_x_at	0.00116	1.72e-06	-5.95951	5.10299	-0.356914	Sin3b	transcriptional regulator, SIN3B (yeast)
1420886_a_at	0.00121	1.83e-06	5.93772	5.04742	0.427875	Xbp1	X-box binding protein 1
1447979_at	0.00121	1.84e-06	5.93469	5.03968	0.305456	Sgsm1	small G protein signaling modulator 1
1457145_at	0.00121	1.88e-06	5.92735	5.02094	0.366165	Plekhg4	pleckstrin homology domain containing, family G (with RhoGef domain) member 4
1439131_at	0.0013	2.05e-06	5.89705	4.94354	0.415197	Txlng	taxilin gamma
1422660_at	0.0013	2.08e-06	-5.89104	4.92818	-0.643527	Gm15453///Rbm3	predicted gene 15453///RNA binding motif protein 3
1423160_at	0.00138	2.27e-06	5.85979	4.84826	0.307554	Spred1	sprouty protein with EVH-1 domain 1, related sequence
1460193_at	0.00138	2.27e-06	5.85947	4.84742	0.255211	St13	suppression of tumorigenicity 13
1424147_at	0.00141	2.34e-06	5.8485	4.81936	0.225392	Ahsa1	AHA1, activator of heat shock protein ATPase 1
1435918_at	0.00141	2.38e-06	5.84282	4.80482	0.373733	Fam107a	family with sequence similarity 107, member A
1423648_at	0.00141	2.41e-06	5.83769	4.7917	0.407977	Pdia6	protein disulfide isomerase associated 6
1424251_a_at	0.00141	2.43e-06	-5.83458	4.78373	-0.261997	Hnrnpdl	heterogeneous nuclear ribonucleoprotein D-like
1436659_at	0.00143	2.51e-06	5.82367	4.75578	0.224372	Dclk1	doublecortin-like kinase 1
1425964_x_at	0.00152	2.7e-06	5.79646	4.68607	0.761972	Hspb1	heat shock protein 1
1438630_x_at	0.00153	2.74e-06	5.79108	4.6723	0.239099	Mat2a	methionine adenosyltransferase II, alpha
1428889_at	0.0016	2.9e-06	-5.77075	4.62016	-0.292394	Alkbh3	alkB homolog 3, alpha-ketoglutarate-dependent dioxygenase
1426235_a_at	0.00164	3.02e-06	5.75598	4.58228	0.272885	Glul	glutamate-ammonia ligase (glutamine synthetase)
1422169_a_at	0.00164	3.05e-06	5.75231	4.57287	0.350583	Bdnf	brain derived neurotrophic factor
1449037_at	0.00164	3.1e-06	5.74744	4.56036	0.356426	Crem	cAMP responsive element modulator
1459372_at	0.00164	3.14e-06	5.74286	4.5486	0.585408	Npas4	neuronal PAS domain protein 4
1429244_at	0.00164	3.16e-06	-5.74055	4.54268	-0.299038	2610524H06Rik	RIKEN cDNA 2610524H06 gene
1426722_at	0.00167	3.27e-06	5.72814	4.51082	0.275245	Slc38a2	solute carrier family 38, member 2
1452754_at	0.00169	3.39e-06	5.71519	4.47755	0.571303	Creld2	cysteine-rich with EGF-like domains 2
1415834_at	0.00169	3.42e-06	5.71102	4.46685	0.320974	Dusp6	dual specificity phosphatase 6
1425076_at	0.00169	3.44e-06	-5.7095	4.46294	-0.290771	Dnajc18	DnaJ heat shock protein family (Hsp40) member C18
1441228_at	0.00169	3.44e-06	5.70913	4.46201	0.299143	Apold1	apolipoprotein L domain containing 1
1455333_at	0.00171	3.52e-06	5.701	4.44111	0.249191	Tns3	tensin 3
1423151_at	0.00172	3.59e-06	5.69366	4.42225	0.338361	Dnajb11	DnaJ heat shock protein family (Hsp40) member B11
1455444_at	0.00178	3.75e-06	5.67843	4.38311	0.311311	Gabra2	gamma-aminobutyric acid (GABA) A receptor, subunit alpha 2
1453077_a_at	0.00182	3.87e-06	5.6674	4.35475	0.203789	Snapc3	small nuclear RNA activating complex, polypeptide 3
1434151_at	0.00184	3.95e-06	5.65944	4.33428	0.274176	Mettl7a1	methyltransferase like 7A1
1431724_a_at	0.00192	4.22e-06	-5.63561	4.27297	-0.274943	P2ry12	purinergic receptor P2Y, G-protein coupled 12
1419230_at	0.00192	4.22e-06	-5.63544	4.27254	-0.366136	Krt12	keratin 12
1434542_at	0.00193	4.28e-06	5.63045	4.25971	0.320801	Gpt2	glutamic pyruvate transaminase (alanine aminotransferase) 2
1422943_a_at	0.00196	4.39e-06	5.6218	4.23745	0.673139	Hspb1	heat shock protein 1
1435119_at	0.00201	4.57e-06	5.60727	4.20004	0.843739	Gm19439	predicted gene, 19439
1451566_at	0.00204	4.69e-06	-5.59755	4.17501	-0.383571	Zfp810	zinc finger protein 810
1423796_at	0.00205	4.84e-06	5.58652	4.14659	0.358143	Sfpq	splicing factor proline/glutamine rich (polypyrimidine tract binding protein associated)
1454725_at	0.00205	4.84e-06	5.5864	4.14628	0.409607	Tra2a	transformer 2 alpha homolog (Drosophila)
1422966_a_at	0.00205	4.87e-06	-5.5846	4.14167	-0.324465	Tfrc	transferrin receptor
1425422_a_at	0.0021	5.03e-06	-5.57293	4.11159	-0.249841	Parn	poly(A)-specific ribonuclease (deadenylation nuclease)
1438796_at	0.00211	5.14e-06	5.56453	4.08995	0.480498	Nr4a3	nuclear receptor subfamily 4, group A, member 3
1423286_at	0.00211	5.17e-06	-5.56304	4.08611	-0.212763	Cbln1	cerebellin 1 precursor protein
1423099_a_at	0.00211	5.24e-06	5.55813	4.07345	0.239389	Mettl3	methyltransferase like 3
1428052_a_at	0.00211	5.27e-06	5.55566	4.06708	0.718441	Zmym1	zinc finger, MYM domain containing 1
1434858_x_at	0.00211	5.29e-06	5.55417	4.06324	0.222551	Zfp511	zinc finger protein 511
1436060_at	0.00214	5.41e-06	-5.54675	4.04412	-0.224414	Gm15706	predicted gene 15706
1439575_at	0.0022	5.62e-06	-5.53281	4.00819	-0.26732	Tmem232	transmembrane protein 232
1417612_at	0.0022	5.65e-06	5.53097	4.00343	0.305117	Ier5	immediate early response 5
1425140_at	0.0022	5.74e-06	-5.52501	3.98806	-0.383046	Lactb2	lactamase, beta 2
1427245_at	0.0022	5.79e-06	-5.52173	3.97962	-0.196182	Arfgap1	ADP-ribosylation factor GTPase activating protein 1
1424119_at	0.0022	5.82e-06	-5.52035	3.97604	-0.296918	Prkab1	protein kinase, AMP-activated, beta 1 non-catalytic subunit
1434826_at	0.00228	6.13e-06	-5.50131	3.92693	-0.246954	Rfesd	Rieske (Fe-S) domain containing
1429862_at	0.00228	6.2e-06	-5.49746	3.91701	-0.487109	Pla2g4e	phospholipase A2, group IVE
1455003_at	0.00228	6.22e-06	5.49602	3.91329	0.220693	Thap1	THAP domain containing, apoptosis associated protein 1
1438075_at	0.00229	6.34e-06	-5.48962	3.89677	-0.25947	Fem1c	fem-1 homolog c (C.elegans)
1424355_a_at	0.00229	6.35e-06	-5.48868	3.89436	-0.284955	Sin3b	transcriptional regulator, SIN3B (yeast)
1420622_a_at	0.00229	6.45e-06	5.48326	3.88037	0.30584	Hspa8	heat shock protein 8
1428387_at	0.00229	6.54e-06	5.47829	3.86753	0.195252	Acsl3	acyl-CoA synthetase long-chain family member 3
1424622_at	0.00229	6.55e-06	5.47785	3.8664	0.19874	Hsf1	heat shock factor 1
1435745_at	0.00229	6.68e-06	5.47076	3.8481	0.222728	5031439G07Rik	RIKEN cDNA 5031439G07 gene
1427198_at	0.00229	6.73e-06	-5.46807	3.84115	-0.39982	BC022960	cDNA sequence BC022960
1417575_at	0.00229	6.74e-06	5.46758	3.83989	0.33619	Otub2	OTU domain, ubiquitin aldehyde binding 2
1456038_at	0.00229	6.74e-06	-5.46737	3.83935	-0.30069	Fbxl4	F-box and leucine-rich repeat protein 4
1427411_s_at	0.00234	6.95e-06	5.45667	3.81172	0.330614	Dleu2	deleted in lymphocytic leukemia, 2
1434817_s_at	0.00236	7.07e-06	-5.45021	3.79504	-0.588711	Rprd2	regulation of nuclear pre-mRNA domain containing 2
1456764_at	0.00239	7.22e-06	5.44279	3.7759	0.168064	Slc35f3	solute carrier family 35, member F3
1434055_at	0.0024	7.31e-06	5.43816	3.76393	0.379572	Galnt9	UDP-N-acetyl-alpha-D-galactosamine:polypeptide N-acetylgalactosaminyltransferase 9
1452232_at	0.0024	7.34e-06	5.43677	3.76033	0.232592	Galnt7	UDP-N-acetyl-alpha-D-galactosamine: polypeptide N-acetylgalactosaminyltransferase 7
1443163_at	0.00241	7.42e-06	5.43296	3.7505	0.390734	Slc39a2	solute carrier family 39 (zinc transporter), member 2
1441964_at	0.00241	7.49e-06	-5.42959	3.7418	-0.357978	Qk	quaking
1423608_at	0.00248	7.75e-06	-5.41749	3.71054	-0.298162	Itm2a	integral membrane protein 2A
1458028_at	0.00248	7.82e-06	-5.41392	3.70133	-0.217361	Lyrm9	LYR motif containing 9
1416920_at	0.00258	8.18e-06	5.39773	3.6595	0.238403	Gm21992///Rbm4	predicted gene 21992///RNA binding motif protein 4
1452869_at	0.00263	8.41e-06	5.38808	3.63455	0.185334	Prpf38b	PRP38 pre-mRNA processing factor 38 (yeast) domain containing B
1429528_at	0.00274	8.81e-06	-5.3714	3.59143	-0.199684	Rae1	ribonucleic acid export 1
1415889_a_at	0.00287	9.29e-06	5.35216	3.5417	0.295392	Hsp90b1	heat shock protein 90, beta (Grp94), member 1
1447537_at	0.00289	9.41e-06	5.34769	3.53014	0.349578	1500032P08Rik///Cfp	RIKEN cDNA 1500032P08 gene///complement factor properdin
1445669_at	0.00289	9.51e-06	5.3437	3.51983	0.376988	Spry4	sprouty homolog 4 (Drosophila)
AFFX-TransRecMur/X57349_3_at	0.00294	9.78e-06	-5.33399	3.49471	-0.291888	Tfrc	transferrin receptor
1455789_x_at	0.00295	9.88e-06	5.33003	3.48448	0.225826	Hspa8	heat shock protein 8
1419070_at	0.00295	9.97e-06	5.32683	3.47619	0.412051	Cys1	cystin 1
1452462_a_at	0.00298	1.02e-05	5.31959	3.45747	0.248041	Banp	BTG3 associated nuclear protein
1422869_at	0.00298	1.03e-05	5.31682	3.45029	0.317922	Mertk	c-mer proto-oncogene tyrosine kinase
1437223_s_at	0.00299	1.03e-05	5.31365	3.4421	0.423738	Xbp1	X-box binding protein 1
1420012_at	0.00299	1.04e-05	5.31179	3.43729	0.291054	Xbp1	X-box binding protein 1
1457276_at	0.00299	1.06e-05	5.30662	3.42391	0.321092	Sik2	salt inducible kinase 2
1417394_at	0.00299	1.06e-05	5.30555	3.42115	0.474725	Klf4	Kruppel-like factor 4 (gut)
1449773_s_at	0.00299	1.06e-05	5.30521	3.42028	0.239722	Gadd45b	growth arrest and DNA-damage-inducible 45 beta
1460645_at	0.003	1.08e-05	5.29817	3.40204	0.400088	Chordc1	cysteine and histidine-rich domain (CHORD)-containing, zinc-binding protein 1
1419467_at	0.003	1.08e-05	-5.29681	3.39854	-0.32139	Clec14a	C-type lectin domain family 14, member a
1457690_at	0.003	1.09e-05	5.29375	3.39063	0.466653	Kalrn	kalirin, RhoGEF kinase
1417393_a_at	0.003	1.1e-05	-5.29291	3.38844	-0.18315	Fam132a	family with sequence similarity 132, member A
1454658_at	0.003	1.11e-05	-5.28992	3.38071	-0.242237	Ilvbl	ilvB (bacterial acetolactate synthase)-like
1448446_at	0.003	1.12e-05	-5.28652	3.37192	-0.189873	Deaf1	deformed epidermal autoregulatory factor 1 (Drosophila)
1455687_at	0.003	1.12e-05	5.2863	3.37134	0.237539	Ick	intestinal cell kinase
1429966_at	0.003	1.12e-05	-5.28593	3.3704	-0.31527	Abhd18	abhydrolase domain containing 18
1438201_at	0.00304	1.14e-05	5.27842	3.35095	0.359675	Pdp1	pyruvate dehyrogenase phosphatase catalytic subunit 1
1418572_x_at	0.00304	1.15e-05	5.2761	3.34494	0.226185	Tnfrsf12a	tumor necrosis factor receptor superfamily, member 12a
1416953_at	0.00304	1.15e-05	5.27478	3.34153	0.263442	Ctgf	connective tissue growth factor
1417130_s_at	0.00316	1.2e-05	5.25909	3.30093	0.284071	Angptl4	angiopoietin-like 4
1428664_at	0.00322	1.23e-05	5.25052	3.27874	0.183933	Vip	vasoactive intestinal polypeptide
1449121_at	0.00325	1.26e-05	5.24379	3.26134	0.309818	Srsf10	serine/arginine-rich splicing factor 10
1455685_at	0.00325	1.27e-05	5.2407	3.25334	0.274708	Mical2	microtubule associated monooxygenase, calponin and LIM domain containing 2
1456010_x_at	0.00325	1.27e-05	-5.24065	3.25319	-0.37653	Hes5	hairy and enhancer of split 5 (Drosophila)
1448471_a_at	0.00327	1.28e-05	5.23684	3.24335	0.321821	Ctla2a	cytotoxic T lymphocyte-associated protein 2 alpha
1436094_at	0.00336	1.33e-05	5.22262	3.20654	0.358938	Vgf	VGF nerve growth factor inducible
1443954_at	0.00336	1.34e-05	-5.22213	3.20525	-0.327164	Rad18	RAD18 E3 ubiquitin protein ligase
1427975_at	0.00336	1.34e-05	5.22032	3.20058	0.312505	Rasl10a	RAS-like, family 10, member A
1420772_a_at	0.00337	1.35e-05	5.21758	3.19347	0.508696	Tsc22d3	TSC22 domain family, member 3
1451047_at	0.00344	1.4e-05	-5.20584	3.16308	-0.297804	Itm2a	integral membrane protein 2A
1439541_at	0.00344	1.41e-05	-5.20372	3.1576	-0.236317	Particl	promoter of Mat2a antisense radiation induced circulating long non-coding RNA
1456111_at	0.00344	1.41e-05	-5.20278	3.15516	-0.492923	Nxpe4	neurexophilin and PC-esterase domain family, member 4
1433830_at	0.00348	1.45e-05	5.19381	3.13194	0.201151	Hnrnpa2b1	heterogeneous nuclear ribonucleoprotein A2/B1
1434094_at	0.00348	1.45e-05	-5.19254	3.12865	-0.371394	Tmem125	transmembrane protein 125
1458087_at	0.00348	1.45e-05	5.19219	3.12775	0.322861	Stac3	SH3 and cysteine rich domain 3
1444874_at	0.00351	1.47e-05	5.18706	3.11447	0.51111	Atp5g1	ATP synthase, H+ transporting, mitochondrial F0 complex, subunit C1 (subunit 9)
1452733_at	0.00351	1.48e-05	5.18449	3.10781	0.201359	Pank2	pantothenate kinase 2
1435705_at	0.00351	1.48e-05	-5.18414	3.1069	-0.206266	Zscan18	zinc finger and SCAN domain containing 18
1425281_a_at	0.00351	1.49e-05	5.18219	3.10184	0.504468	Tsc22d3	TSC22 domain family, member 3
1425319_s_at	0.00361	1.55e-05	5.16962	3.06931	0.281857	Snrnp48	small nuclear ribonucleoprotein 48 (U11/U12)
1421197_a_at	0.00365	1.57e-05	5.16388	3.05444	0.28217	Acin1	apoptotic chromatin condensation inducer 1
1421028_a_at	0.00368	1.6e-05	-5.15754	3.03801	-0.209887	Mef2c	myocyte enhancer factor 2C
1431394_a_at	0.00368	1.6e-05	5.15703	3.0367	0.301797	Lrrk2	leucine-rich repeat kinase 2
1453009_at	0.00368	1.61e-05	5.15577	3.03344	0.29049	Cpm	carboxypeptidase M
1454711_at	0.00376	1.65e-05	5.14656	3.00959	0.249422	Trio	triple functional domain (PTPRF interacting)
1452506_a_at	0.00376	1.67e-05	5.14311	3.00064	0.17857	Ilkap	integrin-linked kinase-associated serine/threonine phosphatase 2C
1426519_at	0.00376	1.67e-05	5.14199	2.99775	0.566278	P4ha1	procollagen-proline, 2-oxoglutarate 4-dioxygenase (proline 4-hydroxylase), alpha 1 polypeptide
1437419_at	0.00376	1.69e-05	-5.13837	2.98839	-0.359501	Bmp2k	BMP2 inducible kinase
1423566_a_at	0.00376	1.7e-05	5.13661	2.98382	0.310589	Hsph1	heat shock 105kDa/110kDa protein 1
1426614_at	0.00376	1.7e-05	5.13601	2.98226	0.229414	Zmynd8	zinc finger, MYND-type containing 8
1425568_a_at	0.00376	1.7e-05	5.13573	2.98153	0.225906	Tmem33	transmembrane protein 33
1435186_s_at	0.00381	1.73e-05	-5.1292	2.96464	-0.325793	Lrrcc1	leucine rich repeat and coiled-coil domain containing 1
1439163_at	0.0039	1.78e-05	5.11933	2.93907	0.413473	Zbtb16	zinc finger and BTB domain containing 16
1424235_at	0.00393	1.8e-05	5.11471	2.92709	0.299511	Gm5553///Ormdl2	predicted gene 5553///ORM1-like 2 (S. cerevisiae)
1422155_at	0.00398	1.84e-05	5.10792	2.9095	0.436253	Hist2h3b///Hist1h3e///Hist1h3b///Hist1h3d///Hist1h3c///Hist1h3f///Hist2h3c2///Hist2h3c1	histone cluster 2, H3b///histone cluster 1, H3e///histone cluster 1, H3b///histone cluster 1, H3d///histone cluster 1, H3c///histone cluster 1, H3f///histone cluster 2, H3c2///histone cluster 2, H3c1
1428223_at	0.00405	1.87e-05	5.10061	2.89057	0.451258	Mfsd2a	major facilitator superfamily domain containing 2A
1434730_at	0.00405	1.89e-05	-5.09721	2.88176	-0.243276	Mir9-3hg	Mir9-3 host gene
1429050_at	0.00405	1.89e-05	-5.09697	2.88116	-0.313141	Chic2	cysteine-rich hydrophobic domain 2
1417920_at	0.00405	1.9e-05	-5.09529	2.87681	-0.364848	Amn	amnionless
1416840_at	0.00405	1.92e-05	-5.09155	2.8671	-0.162128	Mid1ip1	Mid1 interacting protein 1 (gastrulation specific G12-like (zebrafish))
1438386_x_at	0.00405	1.92e-05	5.09133	2.86654	0.224095	Mat2a	methionine adenosyltransferase II, alpha
1421571_a_at	0.00407	1.94e-05	5.0879	2.85765	0.276094	Ly6c2///Ly6c1	lymphocyte antigen 6 complex, locus C2///lymphocyte antigen 6 complex, locus C1
1438852_x_at	0.00407	1.95e-05	-5.08699	2.85531	-0.317894	Mcm6	minichromosome maintenance complex component 6
1428173_at	0.00413	1.99e-05	-5.07885	2.8342	-0.219628	Eml2	echinoderm microtubule associated protein like 2
1434557_at	0.00413	2e-05	5.07819	2.83249	0.193423	Hip1	huntingtin interacting protein 1
1438724_at	0.00451	2.19e-05	5.0443	2.74472	0.318421	Osbpl3	oxysterol binding protein-like 3
1418322_at	0.00451	2.21e-05	5.04245	2.73993	0.3732	Crem	cAMP responsive element modulator
1448918_at	0.00451	2.22e-05	5.03996	2.73349	0.165709	Slco3a1	solute carrier organic anion transporter family, member 3a1
1418902_at	0.00451	2.22e-05	-5.03981	2.73309	-0.336634	Chid1	chitinase domain containing 1
1450850_at	0.00464	2.31e-05	5.02647	2.69854	0.199732	Ezr	ezrin
1426683_at	0.0047	2.35e-05	5.02038	2.68277	0.195437	Cnot6	CCR4-NOT transcription complex, subunit 6
1417068_a_at	0.00472	2.37e-05	5.01713	2.67434	0.187076	Ptpn1	protein tyrosine phosphatase, non-receptor type 1
1416607_at	0.00479	2.42e-05	-5.00928	2.654	-0.250988	4931406C07Rik	RIKEN cDNA 4931406C07 gene
1449800_x_at	0.00479	2.42e-05	-5.00896	2.65319	-0.235137	Phf7	PHD finger protein 7
1419147_at	0.00486	2.48e-05	-5.00006	2.63013	-0.290096	Rec8	REC8 meiotic recombination protein
1427683_at	0.00486	2.48e-05	4.99979	2.62944	0.802891	Egr2	early growth response 2
1452247_at	0.00486	2.49e-05	4.99909	2.62763	0.277289	Fxr1	fragile X mental retardation gene 1, autosomal homolog
1417985_at	0.00487	2.51e-05	-4.99662	2.62121	-0.251465	Nrarp	Notch-regulated ankyrin repeat protein
1450708_at	0.00487	2.53e-05	4.99333	2.61269	0.161346	Scg2	secretogranin II
1431422_a_at	0.00487	2.53e-05	4.99326	2.61251	0.217172	Dusp14	dual specificity phosphatase 14
1455599_at	0.00487	2.54e-05	4.99208	2.60946	0.286968	Gfod1	glucose-fructose oxidoreductase domain containing 1
1423619_at	0.00487	2.55e-05	4.99067	2.60581	0.298865	Rasd1	RAS, dexamethasone-induced 1
1430295_at	0.00489	2.57e-05	-4.98788	2.59859	-0.323272	Gna13	guanine nucleotide binding protein, alpha 13
1448705_at	0.00494	2.61e-05	-4.98198	2.5833	-0.296981	Zbtb22	zinc finger and BTB domain containing 22
1428684_at	0.00494	2.62e-05	-4.98097	2.5807	-0.224273	Tamm41	TAM41 mitochondrial translocator assembly and maintenance homolog
1423474_at	0.00498	2.65e-05	4.97675	2.56975	0.235357	Top1	topoisomerase (DNA) I
1449304_at	0.00504	2.71e-05	-4.96912	2.55	-0.281836	Zbtb11os1	zinc finger and BTB domain containing 11, opposite strand 1
1424033_at	0.00513	2.76e-05	4.96168	2.53072	0.204171	Srsf7	serine/arginine-rich splicing factor 7
1456170_x_at	0.00518	2.82e-05	4.95468	2.5126	0.341066	Calr	calreticulin
1452918_at	0.00518	2.82e-05	-4.95377	2.51023	-0.308666	Fam204a	family with sequence similarity 204, member A
1429001_at	0.00518	2.83e-05	-4.9532	2.50877	-0.323173	Pir	pirin
1448484_at	0.00518	2.84e-05	4.95223	2.50624	0.193785	Amd1	S-adenosylmethionine decarboxylase 1
1417740_at	0.00519	2.86e-05	4.94985	2.5001	0.204035	Cdc37l1	cell division cycle 37-like 1
1435216_a_at	0.0052	2.88e-05	-4.94709	2.49294	-0.243105	Odf2	outer dense fiber of sperm tails 2
1428621_a_at	0.0052	2.89e-05	-4.94569	2.48933	-0.157526	Ramp2///Vps25	receptor (calcitonin) activity modifying protein 2///vacuolar protein sorting 25
1444468_at	0.0052	2.9e-05	4.94439	2.48594	0.247259	Paqr8	progestin and adipoQ receptor family member VIII
1416288_at	0.0052	2.9e-05	4.94389	2.48466	0.213614	Dnaja1	DnaJ heat shock protein family (Hsp40) member A1
1454782_at	0.00522	2.93e-05	-4.94073	2.47647	-0.164444	Adgrb3	adhesion G protein-coupled receptor B3
1442068_at	0.00525	2.97e-05	4.93609	2.46447	0.18011	Gm20081	predicted gene, 20081
1417649_at	0.00525	2.97e-05	-4.93586	2.46385	-0.212549	Cdkn1c	cyclin-dependent kinase inhibitor 1C (P57)
1436447_at	0.00532	3.02e-05	-4.92957	2.44757	-0.252471	A630026N12Rik	RIKEN cDNA A630026N12 gene
1416590_a_at	0.00532	3.04e-05	-4.92764	2.44257	-0.265213	Rab34	RAB34, member RAS oncogene family
1449533_at	0.00532	3.04e-05	4.92697	2.44084	0.310948	Tmem100	transmembrane protein 100
1445330_at	0.00538	3.09e-05	4.92152	2.42673	0.21914	Pdia3	protein disulfide isomerase associated 3
1449542_at	0.00551	3.18e-05	4.91137	2.40046	0.267677	Pbx1	pre B cell leukemia homeobox 1
1426187_a_at	0.00553	3.21e-05	4.90827	2.39242	0.179965	Hax1	HCLS1 associated X-1
1447954_at	0.00553	3.21e-05	-4.90755	2.39056	-0.246172	Lrrc49	leucine rich repeat containing 49
1428784_at	0.00557	3.25e-05	4.9035	2.38007	0.209717	Gmip	Gem-interacting protein
1428917_at	0.00567	3.32e-05	-4.89593	2.36048	-0.229711	Stx17	syntaxin 17
1419163_s_at	0.00575	3.38e-05	4.88981	2.34463	0.275698	Dnajc3	DnaJ heat shock protein family (Hsp40) member C3
1456702_x_at	0.00576	3.4e-05	4.88741	2.33842	0.251249	Mat2a	methionine adenosyltransferase II, alpha
1435484_at	0.00581	3.45e-05	4.88211	2.32472	0.349513	Slc5a3	solute carrier family 5 (inositol transporters), member 3
1429066_at	0.00581	3.45e-05	-4.88188	2.32411	-0.204738	Tctn1	tectonic family member 1
1433481_at	0.00582	3.48e-05	4.87873	2.31596	0.240701	Fkbp14	FK506 binding protein 14
1428963_at	0.00582	3.5e-05	-4.87697	2.31141	-0.181821	Rwdd2a	RWD domain containing 2A
1427682_a_at	0.00582	3.5e-05	4.87667	2.31063	0.541066	Egr2	early growth response 2
1452457_a_at	0.00582	3.51e-05	-4.8761	2.30915	-0.237563	Prkab1	protein kinase, AMP-activated, beta 1 non-catalytic subunit
1433885_at	0.0059	3.57e-05	4.86988	2.29306	0.261323	Iqgap2	IQ motif containing GTPase activating protein 2
1444008_at	0.0059	3.58e-05	-4.86862	2.28979	-0.222203	Gm2137	predicted gene 2137
1452354_at	0.00609	3.71e-05	-4.85586	2.25676	-0.255846	2810459M11Rik	RIKEN cDNA 2810459M11 gene
1453983_a_at	0.00617	3.77e-05	4.84995	2.24148	0.214956	Mettl16	methyltransferase like 16
1450417_a_at	0.0062	3.81e-05	-4.84675	2.23321	-0.26031	Rps20	ribosomal protein S20
1428942_at	0.0062	3.82e-05	4.84522	2.22924	0.410066	Mt2	metallothionein 2
1443724_at	0.00629	3.9e-05	4.83827	2.21124	0.257768	Jph3	junctophilin 3
1455836_at	0.00629	3.9e-05	4.83773	2.20984	0.291184	Papola	poly (A) polymerase alpha
1419248_at	0.00638	3.97e-05	4.83151	2.19376	0.150067	Rgs2	regulator of G-protein signaling 2
1416700_at	0.00639	4e-05	4.82918	2.18772	0.218765	Rnd3	Rho family GTPase 3
1428170_at	0.0064	4.02e-05	4.82764	2.18374	0.2733	Zfp180	zinc finger protein 180
1447830_s_at	0.0064	4.03e-05	4.82653	2.18087	0.190843	Rgs2	regulator of G-protein signaling 2
1429286_at	0.00647	4.1e-05	-4.8199	2.16373	-0.562751	Gkn3	gastrokine 3
1455039_a_at	0.00647	4.13e-05	-4.81772	2.15809	-0.360143	Sin3b	transcriptional regulator, SIN3B (yeast)
1433887_at	0.00647	4.13e-05	4.81747	2.15745	0.30487	Dnajc3	DnaJ heat shock protein family (Hsp40) member C3
1443865_at	0.00647	4.13e-05	4.81742	2.15732	0.242574	Gabra2	gamma-aminobutyric acid (GABA) A receptor, subunit alpha 2
1420998_at	0.00664	4.25e-05	4.80688	2.13005	0.301338	Etv5	ets variant 5
1436411_at	0.00664	4.27e-05	-4.80549	2.12645	-0.30657	Atp13a5	ATPase type 13A5
1426913_at	0.00665	4.29e-05	-4.80385	2.12221	-0.367131	Lss	lanosterol synthase
1417606_a_at	0.00665	4.3e-05	4.80282	2.11955	0.323875	Calr	calreticulin
1435250_at	0.00667	4.34e-05	4.80007	2.11243	0.244132	Ints8	integrator complex subunit 8
1416318_at	0.0068	4.43e-05	-4.79237	2.09252	-0.280483	Serpinb1a	serine (or cysteine) peptidase inhibitor, clade B, member 1a
1425264_s_at	0.00689	4.51e-05	4.78632	2.07688	0.21982	Mbp	myelin basic protein
1457281_at	0.00692	4.54e-05	4.78362	2.06988	0.193792	Dnajc21	DnaJ heat shock protein family (Hsp40) member C21
1438427_at	0.00698	4.59e-05	-4.77926	2.05862	-0.38791	Fam120b	family with sequence similarity 120, member B
1416749_at	0.00702	4.64e-05	4.7759	2.04992	0.23291	Htra1	HtrA serine peptidase 1
1448438_at	0.00704	4.67e-05	4.77373	2.04431	0.214352	Derl2	Der1-like domain family, member 2
1433436_s_at	0.00704	4.68e-05	-4.77252	2.0412	-0.18477	Thtpa	thiamine triphosphatase
1455225_at	0.00705	4.74e-05	4.76823	2.03011	0.225889	Syne1	spectrin repeat containing, nuclear envelope 1
1429169_at	0.00705	4.74e-05	4.76779	2.02895	0.699697	Gm15453///Rbm3	predicted gene 15453///RNA binding motif protein 3
1460206_at	0.00705	4.75e-05	4.7671	2.02719	0.224762	Grasp	GRP1 (general receptor for phosphoinositides 1)-associated scaffold protein
1418086_at	0.00705	4.75e-05	-4.76705	2.02704	-0.23648	Ppp1r14a	protein phosphatase 1, regulatory (inhibitor) subunit 14A
1418187_at	0.00707	4.78e-05	4.76481	2.02125	0.276019	Ramp2	receptor (calcitonin) activity modifying protein 2
1435185_at	0.00713	4.84e-05	-4.76066	2.01053	-0.372474	Lrrcc1	leucine rich repeat and coiled-coil domain containing 1
1454837_at	0.00715	4.87e-05	-4.75853	2.00502	-0.235128	Cln6	ceroid-lipofuscinosis, neuronal 6
1417325_at	0.00715	4.89e-05	-4.75663	2.0001	-0.326733	Btrc	beta-transducin repeat containing protein
1430252_at	0.00715	4.9e-05	-4.75636	1.99941	-0.398437	3110027N22Rik	RIKEN cDNA 3110027N22 gene
1453040_at	0.00727	5.01e-05	-4.74846	1.979	-0.253061	Slc25a53	solute carrier family 25, member 53
1433543_at	0.00727	5.01e-05	4.74799	1.97778	0.261769	Anln	anillin, actin binding protein
1417706_at	0.00727	5.05e-05	-4.74565	1.97172	-0.297244	Naglu	alpha-N-acetylglucosaminidase (Sanfilippo disease IIIB)
1431642_at	0.00727	5.05e-05	-4.74505	1.97019	-0.402454	Eif2s3y	eukaryotic translation initiation factor 2, subunit 3, structural gene Y-linked
1435679_at	0.00727	5.06e-05	-4.74467	1.96921	-0.302183	Optn	optineurin
1425826_a_at	0.00728	5.09e-05	4.74271	1.96413	0.178384	Sorbs1	sorbin and SH3 domain containing 1
1435160_at	0.00729	5.11e-05	4.74113	1.96005	0.287236	Ahsa2	AHA1, activator of heat shock protein ATPase 2
1417177_at	0.00732	5.14e-05	-4.73886	1.95418	-0.214076	Galk1	galactokinase 1
1415872_at	0.00734	5.19e-05	4.73583	1.94636	0.214171	Hnrnph1	heterogeneous nuclear ribonucleoprotein H1
1460366_at	0.00734	5.19e-05	-4.73535	1.94512	-0.283423	Eml3	echinoderm microtubule associated protein like 3
1433944_at	0.00739	5.25e-05	4.73167	1.9356	0.262312	Hectd2	HECT domain containing 2
1455686_at	0.0074	5.26e-05	-4.73041	1.93235	-0.312951	Lcorl	ligand dependent nuclear receptor corepressor-like
1457736_at	0.00754	5.38e-05	-4.72243	1.91173	-0.16902	Vps37d	vacuolar protein sorting 37D
1428630_x_at	0.00758	5.44e-05	-4.71872	1.90214	-0.337558	Haghl	hydroxyacylglutathione hydrolase-like
1438040_a_at	0.00758	5.45e-05	4.7181	1.90056	0.295718	Hsp90b1	heat shock protein 90, beta (Grp94), member 1
1420623_x_at	0.00779	5.65e-05	4.70503	1.86678	0.15132	Hspa8	heat shock protein 8
1439967_at	0.00779	5.66e-05	-4.70441	1.86519	-0.286458	1700071A11Rik	RIKEN cDNA 1700071A11 gene
1418664_at	0.00779	5.67e-05	4.70401	1.86416	0.183777	Mpdz	multiple PDZ domain protein
1455937_at	0.00787	5.74e-05	-4.69929	1.85196	-0.29726	Lrrtm4	leucine rich repeat transmembrane neuronal 4
1420365_a_at	0.0079	5.78e-05	4.69706	1.8462	0.140928	Hnrnpa2b1	heterogeneous nuclear ribonucleoprotein A2/B1
1450843_a_at	0.00791	5.81e-05	4.69528	1.84162	0.380963	Serpinh1	serine (or cysteine) peptidase inhibitor, clade H, member 1
1433607_at	0.00793	5.84e-05	4.69319	1.8362	0.324833	Cbln4	cerebellin 4 precursor protein
1420965_a_at	0.00799	5.92e-05	4.68855	1.82422	0.182688	Enc1	ectodermal-neural cortex 1
1422948_s_at	0.00799	5.94e-05	4.68715	1.82062	0.23277	Hist1h4m///Hist1h4b///Hist1h4a///Hist4h4///Hist1h4n///Hist1h4k///Hist1h4j///Hist1h4i///Hist1h4f///Hist1h4d///Hist1h4c///Hist2h4///Hist1h4h	histone cluster 1, H4m///histone cluster 1, H4b///histone cluster 1, H4a///histone cluster 4, H4///histone cluster 1, H4n///histone cluster 1, H4k///histone cluster 1, H4j///histone cluster 1, H4i///histone cluster 1, H4f///histone cluster 1, H4d///histone cluster 1, H4c///histone cluster 2, H4///histone cluster 1, H4h
1433576_at	0.00799	5.95e-05	4.68661	1.81923	0.313288	Mat2a	methionine adenosyltransferase II, alpha
1455712_at	0.00799	5.96e-05	4.68611	1.81794	0.176798	Hist3h2a	histone cluster 3, H2a
1435249_at	0.00818	6.11e-05	4.67697	1.79435	0.220661	Btaf1	B-TFIID TATA-box binding protein associated factor 1
1433806_x_at	0.0082	6.15e-05	4.67478	1.78869	0.319063	Calr	calreticulin
1435221_at	0.00828	6.22e-05	-4.67041	1.77739	-0.202295	Foxp1	forkhead box P1
1420660_at	0.00836	6.31e-05	-4.66516	1.76386	-0.254441	Lrrc6	leucine rich repeat containing 6 (testis)
1416591_at	0.00836	6.34e-05	-4.66377	1.76026	-0.27607	Rab34	RAB34, member RAS oncogene family
1428488_at	0.00836	6.34e-05	-4.66356	1.75972	-0.168419	Pigk	phosphatidylinositol glycan anchor biosynthesis, class K
1430798_x_at	0.00855	6.5e-05	-4.65465	1.73673	-0.326058	Mrpl15	mitochondrial ribosomal protein L15
1441598_at	0.00859	6.55e-05	-4.65193	1.72972	-0.379542	Tmeff2	transmembrane protein with EGF-like and two follistatin-like domains 2
1458484_at	0.00879	6.73e-05	4.64197	1.704	0.20346	A730020M07Rik	RIKEN cDNA A730020M07 gene
1455868_a_at	0.00879	6.74e-05	-4.6414	1.70255	-0.233045	Tubgcp2	tubulin, gamma complex associated protein 2
1433529_at	0.00897	6.9e-05	-4.63318	1.68134	-0.233063	Pamr1	peptidase domain containing associated with muscle regeneration 1
1436043_at	0.00903	6.97e-05	-4.6297	1.67236	-0.174689	Scn7a	sodium channel, voltage-gated, type VII, alpha
1456733_x_at	0.00908	7.03e-05	4.62663	1.66444	0.307108	Serpinh1	serine (or cysteine) peptidase inhibitor, clade H, member 1
1443921_at	0.00909	7.05e-05	-4.62545	1.66139	-0.198715	Ranbp3l	RAN binding protein 3-like
1428198_at	0.0091	7.12e-05	4.62197	1.65242	0.207729	Adal	adenosine deaminase-like
1428894_at	0.0091	7.13e-05	-4.62159	1.65146	-0.194618	Selo	selenoprotein O
1418206_at	0.00922	7.24e-05	4.61614	1.6374	0.544411	Sdf2l1	stromal cell-derived factor 2-like 1
1455940_x_at	0.00934	7.35e-05	-4.61046	1.62276	-0.239123	Wdr6	WD repeat domain 6
1435246_at	0.00948	7.48e-05	4.60396	1.606	0.220727	Paqr8	progestin and adipoQ receptor family member VIII
1433745_at	0.00952	7.54e-05	4.60133	1.59921	0.198465	Trio	triple functional domain (PTPRF interacting)
1421961_a_at	0.00955	7.6e-05	4.59845	1.59181	0.35574	Dnajb5	DnaJ heat shock protein family (Hsp40) member B5
1435905_at	0.00955	7.62e-05	4.59773	1.58994	0.322834	Supt20	suppressor of Ty 20
1458802_at	0.00955	7.62e-05	4.59737	1.58901	0.179747	Hivep3	human immunodeficiency virus type I enhancer binding protein 3
1434329_s_at	0.00961	7.69e-05	4.59404	1.58042	0.337136	Adipor2	adiponectin receptor 2
1435737_a_at	0.00967	7.78e-05	4.59012	1.57033	0.267129	Nde1	nudE neurodevelopment protein 1
1437924_at	0.00967	7.8e-05	-4.58904	1.56754	-0.235357	Son	Son DNA binding protein
1420543_at	0.00967	7.83e-05	4.58764	1.56394	0.21383	Dnajc28	DnaJ heat shock protein family (Hsp40) member C28
1440886_at	0.00967	7.9e-05	4.5844	1.55558	0.204318	Cdc37l1	cell division cycle 37-like 1
1440989_at	0.00967	7.91e-05	4.58411	1.55485	0.182728	Mrpl35	mitochondrial ribosomal protein L35
1460314_s_at	0.00967	7.92e-05	4.58359	1.5535	0.339202	Hist1h3a///Hist2h3b///Hist1h3i///Hist1h3h///Hist1h3e///Hist1h3b///Hist1h3d///Hist1h3c///Hist1h3f///Hist1h3g///Hist2h3c2///Hist2h3c1	histone cluster 1, H3a///histone cluster 2, H3b///histone cluster 1, H3i///histone cluster 1, H3h///histone cluster 1, H3e///histone cluster 1, H3b///histone cluster 1, H3d///histone cluster 1, H3c///histone cluster 1, H3f///histone cluster 1, H3g///histone cluster 2, H3c2///histone cluster 2, H3c1
1417529_at	0.00967	7.93e-05	-4.5833	1.55275	-0.176058	Rab33a	RAB33A, member RAS oncogene family
1428810_at	0.00967	7.95e-05	4.58234	1.55029	0.154874	2700097O09Rik	RIKEN cDNA 2700097O09 gene
1434347_s_at	0.00967	7.96e-05	-4.5819	1.54915	-0.25936	Rufy2	RUN and FYVE domain-containing 2
1434369_a_at	0.00968	7.99e-05	4.58063	1.54587	0.310149	Cryab	crystallin, alpha B
1426040_a_at	0.00986	8.18e-05	-4.57203	1.52372	-0.463211	Odf2	outer dense fiber of sperm tails 2
1421962_at	0.0101	8.41e-05	4.56208	1.49811	0.211628	Dnajb5	DnaJ heat shock protein family (Hsp40) member B5
1442124_at	0.0102	8.5e-05	4.55809	1.48782	0.204124	AU022252	expressed sequence AU022252
1428927_at	0.0103	8.59e-05	4.55433	1.47814	0.246509	Shq1	SHQ1 homolog (S. cerevisiae)
1428175_at	0.0103	8.62e-05	-4.55331	1.47553	-0.194543	Tmem161b	transmembrane protein 161B
1455164_at	0.0105	8.79e-05	4.54596	1.45659	0.191995	Arhgap31	Rho GTPase activating protein 31
1451326_at	0.0105	8.81e-05	-4.54529	1.45488	-0.184112	Abhd14b	abhydrolase domain containing 14b
1453061_at	0.0107	9.03e-05	-4.53655	1.43239	-0.160663	Elac1	elaC ribonuclease Z 1
1436038_a_at	0.0107	9.03e-05	-4.53644	1.43209	-0.186729	Pigp	phosphatidylinositol glycan anchor biosynthesis, class P
1449372_at	0.0107	9.05e-05	4.53541	1.42945	0.242928	Dnajc3	DnaJ heat shock protein family (Hsp40) member C3
1448629_at	0.0107	9.14e-05	4.53192	1.42047	0.195892	Hps4	Hermansky-Pudlak syndrome 4
1438756_at	0.0107	9.19e-05	4.52996	1.41543	0.24598	Ankrd29	ankyrin repeat domain 29
1455638_at	0.0107	9.24e-05	4.52813	1.41073	0.236423	Zfp319	zinc finger protein 319
1437101_at	0.0107	9.26e-05	4.52742	1.40888	0.267913	Lats2	large tumor suppressor 2
1424904_at	0.0107	9.26e-05	-4.52734	1.40869	-0.202367	Vwa8	von Willebrand factor A domain containing 8
1429232_at	0.0107	9.27e-05	-4.52696	1.40769	-0.273124	Hnrnpr	heterogeneous nuclear ribonucleoprotein R
1423633_at	0.0108	9.33e-05	4.52467	1.40182	0.232253	Snrnp48	small nuclear ribonucleoprotein 48 (U11/U12)
1428863_at	0.0108	9.36e-05	-4.52339	1.39852	-0.18533	Ankrd39	ankyrin repeat domain 39
1427127_x_at	0.0108	9.39e-05	4.52235	1.39585	0.979908	Hspa1b	heat shock protein 1B
1434052_at	0.0108	9.4e-05	-4.52182	1.39449	-0.197961	AI593442	expressed sequence AI593442
1440981_at	0.0109	9.49e-05	-4.51848	1.3859	-0.392862	Pak7	p21 protein (Cdc42/Rac)-activated kinase 7
1428946_at	0.0109	9.54e-05	4.51646	1.38069	0.192729	Uba6	ubiquitin-like modifier activating enzyme 6
1424955_at	0.0109	9.56e-05	-4.51588	1.3792	-0.232724	Haus1	HAUS augmin-like complex, subunit 1
1437122_at	0.0109	9.58e-05	4.51521	1.37749	0.220924	Bcl2	B cell leukemia/lymphoma 2
1423667_at	0.0109	9.58e-05	4.51518	1.37742	0.161194	Mat2a	methionine adenosyltransferase II, alpha
1458281_at	0.011	9.69e-05	-4.51077	1.36608	-0.24992	Arsb	arylsulfatase B
1416222_at	0.011	9.78e-05	-4.50749	1.35763	-0.172014	Nsdhl	NAD(P) dependent steroid dehydrogenase-like
1453386_at	0.0112	9.95e-05	-4.5013	1.34173	-0.215778	Tusc1	tumor suppressor candidate 1
1422134_at	0.0114	0.000102	4.4924	1.31883	0.253949	Fosb	FBJ osteosarcoma oncogene B
1426600_at	0.0115	0.000103	4.49052	1.31401	0.271169	Slc2a1	solute carrier family 2 (facilitated glucose transporter), member 1
1447027_s_at	0.0115	0.000103	-4.48926	1.31078	-0.152482	Lias	lipoic acid synthetase
1428342_at	0.0115	0.000104	-4.48663	1.30401	-0.218423	Rcor3	REST corepressor 3
1456698_s_at	0.0116	0.000104	-4.48501	1.29986	-0.290517	Hnrnpdl	heterogeneous nuclear ribonucleoprotein D-like
1426827_at	0.0116	0.000105	4.48304	1.29478	0.218325	Ythdc1	YTH domain containing 1
1424883_s_at	0.0116	0.000105	4.48092	1.28933	0.172564	Srsf7	serine/arginine-rich splicing factor 7
1421963_a_at	0.0116	0.000105	-4.48066	1.28868	-0.240992	Cdc25b	cell division cycle 25B
1460182_at	0.0116	0.000106	-4.47893	1.28423	-0.193869	Snx4	sorting nexin 4
1452619_a_at	0.0116	0.000106	-4.47764	1.28092	-0.254336	Agbl3	ATP/GTP binding protein-like 3
1441706_at	0.0116	0.000106	4.47708	1.27948	0.163336	Dscaml1	Down syndrome cell adhesion molecule like 1
1434047_x_at	0.0116	0.000106	4.47692	1.27907	0.181133	Hnrnpa2b1	heterogeneous nuclear ribonucleoprotein A2/B1
1453374_at	0.0116	0.000107	-4.47679	1.27872	-0.295804	Zfand5	zinc finger, AN1-type domain 5
1429363_at	0.0117	0.000108	4.47167	1.26558	0.238123	Vps37a	vacuolar protein sorting 37A
1416303_at	0.0117	0.000108	-4.47021	1.26182	-0.212104	Litaf	LPS-induced TN factor
1416129_at	0.0117	0.000109	4.46895	1.25858	0.236667	Errfi1	ERBB receptor feedback inhibitor 1
1433659_at	0.0119	0.00011	4.46432	1.24669	0.213027	Tubgcp4	tubulin, gamma complex associated protein 4
1436492_x_at	0.0119	0.00011	-4.46395	1.24575	-0.354499	Gm29695///Lemd1	predicted gene, 29695///LEM domain containing 1
1442051_at	0.0119	0.000111	4.46317	1.24373	0.554052	Hist2h3b///Hist1h3e///Hist1h3b///Hist1h3d///Hist1h3c///Hist1h3f///Hist2h3c2///Hist2h3c1	histone cluster 2, H3b///histone cluster 1, H3e///histone cluster 1, H3b///histone cluster 1, H3d///histone cluster 1, H3c///histone cluster 1, H3f///histone cluster 2, H3c2///histone cluster 2, H3c1
1434249_s_at	0.0119	0.000112	4.45935	1.23395	0.25061	Trim9	tripartite motif-containing 9
1454109_a_at	0.012	0.000113	4.4564	1.22636	0.237644	Jmjd6	jumonji domain containing 6
1429503_at	0.012	0.000113	-4.4546	1.22175	-0.17248	Fam69a	family with sequence similarity 69, member A
1423074_at	0.012	0.000113	4.45456	1.22164	0.190528	Lman2	lectin, mannose-binding 2
1450381_a_at	0.012	0.000113	4.45439	1.22119	0.277437	Bcl6	B cell leukemia/lymphoma 6
1434205_at	0.012	0.000114	4.45301	1.21766	0.175533	Ppp2r5c	protein phosphatase 2, regulatory subunit B', gamma
1433640_at	0.0121	0.000115	4.45065	1.21159	0.229531	Fubp1	far upstream element (FUSE) binding protein 1
1429840_at	0.0123	0.000117	-4.44175	1.18874	-0.269143	Carlr	cardiac and apoptosis-related long non-coding RNA
1425706_a_at	0.0123	0.000118	-4.4412	1.18734	-0.188537	Ddb2	damage specific DNA binding protein 2
1456389_at	0.0123	0.000118	-4.43846	1.18032	-0.27535	Zeb2	zinc finger E-box binding homeobox 2
1450061_at	0.0123	0.000119	4.43738	1.17753	0.175005	Enc1	ectodermal-neural cortex 1
1456748_a_at	0.0123	0.000119	-4.43633	1.17484	-0.274882	Nipsnap1	nipsnap homolog 1 (C. elegans)
1454882_at	0.0123	0.000119	4.43614	1.17437	0.213553	L3mbtl3	l(3)mbt-like 3 (Drosophila)
1452715_at	0.0124	0.00012	-4.43265	1.16542	-0.201785	Haus5	HAUS augmin-like complex, subunit 5
1418059_at	0.0124	0.000121	4.43162	1.16277	0.243817	Adgrl4	adhesion G protein-coupled receptor L4
1455696_a_at	0.0124	0.000121	4.43075	1.16054	0.228546	Prpf4b	pre-mRNA processing factor 4B
1431929_a_at	0.0125	0.000122	-4.42828	1.1542	-0.150903	Stx17	syntaxin 17
1428584_a_at	0.0125	0.000122	-4.42708	1.15113	-0.27523	Haghl	hydroxyacylglutathione hydrolase-like
1450936_a_at	0.0125	0.000122	4.42695	1.15079	0.345365	Dnase1l2	deoxyribonuclease 1-like 2
1430651_s_at	0.0125	0.000123	4.4242	1.14373	0.191032	Zfp24	zinc finger protein 24
1436574_at	0.0126	0.000124	-4.42099	1.13551	-0.267229	Znf41-ps	ZNF41, pseudogene
1441807_s_at	0.0126	0.000124	-4.42083	1.13509	-0.286239	Fam228b	family with sequence similarity 228, member B
1434628_a_at	0.0126	0.000125	4.41997	1.13289	0.260682	Rhpn2	rhophilin, Rho GTPase binding protein 2
1423674_at	0.0127	0.000126	-4.41669	1.12448	-0.208397	Usp1	ubiquitin specific peptidase 1
1423490_at	0.0127	0.000126	4.41645	1.12386	0.152367	Fbxo3	F-box protein 3
1430023_at	0.0128	0.000127	-4.4134	1.11605	-0.295092	Spata24	spermatogenesis associated 24
1448714_at	0.0128	0.000127	4.41216	1.11286	0.191216	Rngtt	RNA guanylyltransferase and 5'-phosphatase
1433936_at	0.0128	0.000128	-4.41062	1.1089	-0.221468	Sdhaf1	succinate dehydrogenase complex assembly factor 1
1428431_at	0.0129	0.000129	4.40757	1.1011	0.221833	Zcchc24	zinc finger, CCHC domain containing 24
1436148_at	0.0129	0.00013	4.4052	1.09502	0.20607	Tnr	tenascin R
1428682_at	0.013	0.000131	-4.40346	1.09057	-0.313602	Zc3h6	zinc finger CCCH type containing 6
1454829_at	0.0131	0.000132	4.39909	1.07935	0.172356	Rundc1	RUN domain containing 1
1424481_s_at	0.0131	0.000132	-4.39895	1.07901	-0.314975	Armcx5	armadillo repeat containing, X-linked 5
1417045_at	0.0131	0.000133	-4.39636	1.07236	-0.204645	Bid	BH3 interacting domain death agonist
1455947_at	0.0131	0.000133	4.39608	1.07164	0.188674	2021-03-11	membrane-associated ring finger (C3HC4) 11
1449283_a_at	0.0131	0.000133	-4.39598	1.0714	-0.248245	Mapk12	mitogen-activated protein kinase 12
1416432_at	0.0131	0.000134	4.39479	1.06834	0.3317	Pfkfb3	6-phosphofructo-2-kinase/fructose-2,6-biphosphatase 3
1422053_at	0.0132	0.000135	4.39205	1.06133	0.324151	Inhba	inhibin beta-A
1452661_at	0.0132	0.000135	-4.39162	1.06022	-0.307557	Tfrc	transferrin receptor
1435608_at	0.0132	0.000135	-4.39029	1.05682	-0.164614	Znrf3	zinc and ring finger 3
1436774_at	0.0132	0.000136	4.38836	1.05186	0.193763	Sel1l	sel-1 suppressor of lin-12-like (C. elegans)
1418938_at	0.0133	0.000137	4.3859	1.04557	0.291113	Dio2	deiodinase, iodothyronine, type II
1456944_at	0.0134	0.000139	-4.38181	1.03509	-0.211595	Kcnc1	potassium voltage gated channel, Shaw-related subfamily, member 1
1423741_at	0.0134	0.000139	4.38025	1.0311	0.17087	Gm15455///Rbm10	predicted gene 15455///RNA binding motif protein 10
1458140_at	0.0136	0.000141	-4.37614	1.02056	-0.309307	Slit2	slit homolog 2 (Drosophila)
1423331_a_at	0.0137	0.000143	-4.37131	1.00821	-0.211179	Nectin3	nectin cell adhesion molecule 3
1447980_s_at	0.0137	0.000143	4.36995	1.00472	0.257865	Sgsm1	small G protein signaling modulator 1
1436893_a_at	0.0138	0.000144	-4.367	0.997187	-0.288306	2021-03-07	membrane-associated ring finger (C3HC4) 7
1435868_at	0.0138	0.000144	4.36699	0.997149	0.224185	Ankrd13c	ankyrin repeat domain 13c
1433577_at	0.0138	0.000145	-4.36648	0.995848	-0.169997	A730017C20Rik	RIKEN cDNA A730017C20 gene
1427235_at	0.0138	0.000145	-4.36555	0.993475	-0.201409	Kdm6a	lysine (K)-specific demethylase 6A
1450668_s_at	0.0138	0.000145	4.36442	0.990565	0.173519	Hspe1	heat shock protein 1 (chaperonin 10)
1442363_at	0.0138	0.000146	-4.36368	0.988675	-0.212537	Mtcl1	microtubule crosslinking factor 1
1454768_at	0.0138	0.000146	4.3635	0.988224	0.270303	Kcnf1	potassium voltage-gated channel, subfamily F, member 1
1448454_at	0.0139	0.000147	4.3598	0.978749	0.225156	Srsf6	serine/arginine-rich splicing factor 6
1454974_at	0.0139	0.000147	-4.3597	0.978485	-0.22318	Ntn1	netrin 1
1415770_at	0.0141	0.00015	-4.35292	0.961142	-0.2218	Wdr6	WD repeat domain 6
1428916_s_at	0.0142	0.000152	-4.34907	0.951305	-0.194633	Sirt5	sirtuin 5
1436209_at	0.0142	0.000152	-4.34851	0.949855	-0.219283	Dnajc16	DnaJ heat shock protein family (Hsp40) member C16
1428686_at	0.0142	0.000153	-4.34678	0.945427	-0.251157	2810029C07Rik	RIKEN cDNA 2810029C07 gene
1434150_a_at	0.0142	0.000153	4.34579	0.942902	0.296657	Mettl7a2///Mettl7a1	methyltransferase like 7A2///methyltransferase like 7A1
1451405_at	0.0142	0.000153	-4.34569	0.942644	-0.157992	Pcca	propionyl-Coenzyme A carboxylase, alpha polypeptide
1438785_at	0.0142	0.000153	-4.34506	0.941025	-0.166987	Enpp6	ectonucleotide pyrophosphatase/phosphodiesterase 6
1439386_x_at	0.0142	0.000154	4.34427	0.939009	0.167645	Mat2a	methionine adenosyltransferase II, alpha
1436104_a_at	0.0142	0.000154	-4.34386	0.937968	-0.199347	Ccdc74a	coiled-coil domain containing 74A
1437845_x_at	0.0142	0.000154	4.34378	0.937761	0.25916	Pofut2	protein O-fucosyltransferase 2
1437334_x_at	0.0143	0.000156	-4.33991	0.92787	-0.24494	Parn	poly(A)-specific ribonuclease (deadenylation nuclease)
1420500_at	0.0144	0.000156	4.3382	0.923506	0.226517	Dnajc1	DnaJ heat shock protein family (Hsp40) member C1
1460615_at	0.0144	0.000157	-4.33755	0.921825	-0.220477	Nt5dc1	5'-nucleotidase domain containing 1
1422676_at	0.0144	0.000158	4.3347	0.914539	0.158496	Smarce1	SWI/SNF related, matrix associated, actin dependent regulator of chromatin, subfamily e, member 1
1453573_at	0.0144	0.000158	4.33376	0.912146	0.277413	Hist1h3d	histone cluster 1, H3d
1460033_at	0.0144	0.000158	4.33328	0.91092	0.230286	A330023F24Rik	RIKEN cDNA A330023F24 gene
1436263_at	0.0145	0.000159	4.33154	0.906467	0.216649	Mobp	myelin-associated oligodendrocytic basic protein
1441978_at	0.0146	0.000161	4.32838	0.898403	0.264662	Aqp6	aquaporin 6
1438916_x_at	0.0146	0.000161	4.328	0.89742	0.215459	Firre	functional intergenic repeating RNA element
1434733_at	0.0146	0.000161	4.32717	0.895303	0.302547	Stk36	serine/threonine kinase 36
1460240_a_at	0.0146	0.000162	4.32574	0.891634	0.188922	Hnrnpc	heterogeneous nuclear ribonucleoprotein C
1424291_at	0.0146	0.000162	-4.32554	0.891147	-0.155176	Nup93	nucleoporin 93
1428373_at	0.0146	0.000162	-4.32513	0.89008	-0.289375	Ip6k2	inositol hexaphosphate kinase 2
1457215_at	0.0146	0.000163	4.32375	0.886567	0.180741	Gm13111	predicted gene 13111
1437277_x_at	0.0147	0.000165	4.31877	0.873825	0.204582	Tgm2	transglutaminase 2, C polypeptide
1457716_at	0.0147	0.000165	4.31837	0.872814	0.285961	Otud7b	OTU domain containing 7B
1452170_at	0.0147	0.000165	-4.31836	0.872778	-0.267159	Chpf2	chondroitin polymerizing factor 2
1423624_at	0.0147	0.000166	-4.31693	0.869132	-0.134711	Fancl	Fanconi anemia, complementation group L
1421396_at	0.0147	0.000166	4.31675	0.868676	0.283345	Pcsk1	proprotein convertase subtilisin/kexin type 1
1452047_at	0.0147	0.000166	4.31633	0.867606	0.165048	Cacybp	calcyclin binding protein
1423067_at	0.0149	0.000168	-4.31128	0.854692	-0.229828	Cdk5rap3	CDK5 regulatory subunit associated protein 3
1427629_at	0.0149	0.000168	4.31121	0.85452	0.263708	Ptprj	protein tyrosine phosphatase, receptor type, J
1426903_at	0.0149	0.000169	4.31042	0.852497	0.170763	Fndc3a	fibronectin type III domain containing 3A
1429336_at	0.0149	0.00017	-4.30786	0.84597	-0.203886	Tmem87b	transmembrane protein 87B
1437461_s_at	0.0151	0.000172	4.30284	0.833147	0.26716	Rnpc3	RNA-binding region (RNP1, RRM) containing 3
1428551_at	0.0152	0.000174	-4.30029	0.826648	-0.173689	Trmt11	tRNA methyltransferase 11
1460208_at	0.0152	0.000174	-4.29985	0.825526	-0.193109	Fbn1	fibrillin 1
1436892_at	0.0152	0.000175	4.29788	0.820496	0.27308	Spred2	sprouty-related, EVH1 domain containing 2
1452053_a_at	0.0152	0.000175	4.29779	0.82025	0.209476	Tmem33	transmembrane protein 33
1434032_at	0.0152	0.000175	-4.29757	0.819705	-0.180643	Agap3	ArfGAP with GTPase domain, ankyrin repeat and PH domain 3
1427124_at	0.0152	0.000176	-4.29613	0.816032	-0.296607	4932416H05Rik	RIKEN cDNA 4932416H05 gene
1442039_at	0.0152	0.000176	-4.29577	0.8151	-0.245131	Tox	thymocyte selection-associated high mobility group box
1418306_at	0.0152	0.000176	4.29537	0.814072	0.194056	Crybb1	crystallin, beta B1
1436531_at	0.0152	0.000176	-4.29524	0.813743	-0.282244	Metap2	methionine aminopeptidase 2
1455531_at	0.0152	0.000177	-4.29351	0.809338	-0.288362	Mfsd4a	major facilitator superfamily domain containing 4A
1427172_at	0.0152	0.000177	-4.29301	0.808065	-0.258878	Ofd1	oral-facial-digital syndrome 1 gene homolog (human)
1437742_at	0.0152	0.000177	4.29287	0.807705	0.137304	Rab21	RAB21, member RAS oncogene family
1425548_a_at	0.0152	0.000177	-4.29252	0.806804	-0.170919	Lst1	leukocyte specific transcript 1
1418525_at	0.0153	0.000179	-4.28866	0.796949	-0.260131	Pcm1	pericentriolar material 1
1426896_at	0.0153	0.00018	4.28722	0.79327	0.225954	Zfp24	zinc finger protein 24
1436758_at	0.0153	0.00018	4.28712	0.793036	0.291559	Hdac4	histone deacetylase 4
1436978_at	0.0153	0.000181	-4.286	0.790158	-0.254804	Wnt9a	wingless-type MMTV integration site family, member 9A
1424677_at	0.0153	0.000181	4.2852	0.788124	0.155578	Cyp2j9	cytochrome P450, family 2, subfamily j, polypeptide 9
1436338_at	0.0154	0.000182	4.28353	0.783859	0.300572	Sik2	salt inducible kinase 2
1456178_at	0.0154	0.000182	-4.28259	0.781466	-0.235655	Bambi-ps1	BMP and activin membrane-bound inhibitor, pseudogene (Xenopus laevis)
1448945_at	0.0154	0.000182	-4.28209	0.780191	-0.325623	Pllp	plasma membrane proteolipid
1421507_at	0.0155	0.000184	-4.27853	0.771116	-0.142417	Olfr78	olfactory receptor 78
1440224_at	0.0156	0.000186	-4.27591	0.764431	-0.235873	9330133O14Rik	RIKEN cDNA 9330133O14 gene
1434493_at	0.0156	0.000186	-4.27447	0.760768	-0.223044	1810022K09Rik	RIKEN cDNA 1810022K09 gene
1449342_at	0.0156	0.000188	4.27217	0.754895	0.207692	Hacd2	3-hydroxyacyl-CoA dehydratase 2
1429134_at	0.0156	0.000188	4.27167	0.753606	0.219022	LOC102640118///Hivep3	uncharacterized LOC102640118///human immunodeficiency virus type I enhancer binding protein 3
1418700_at	0.0156	0.000189	-4.27005	0.749484	-0.191834	Lias	lipoic acid synthetase
1428224_at	0.0157	0.00019	-4.26769	0.743472	-0.37589	Hnrnpdl	heterogeneous nuclear ribonucleoprotein D-like
1452318_a_at	0.0157	0.000191	4.26588	0.738858	0.872321	Hspa1b	heat shock protein 1B
1419174_at	0.0159	0.000193	4.26093	0.726236	0.159418	2410004B18Rik	RIKEN cDNA 2410004B18 gene
1424143_a_at	0.0159	0.000194	-4.2592	0.721824	-0.257265	Cdt1	chromatin licensing and DNA replication factor 1
1451509_at	0.0159	0.000194	4.2591	0.721576	0.240547	Ak6///Taf9	adenylate kinase 6///TATA-box binding protein associated factor 9
1416455_a_at	0.0162	0.000198	4.25229	0.704211	0.292198	Cryab	crystallin, alpha B
1419397_at	0.0162	0.000198	4.2518	0.702977	0.231781	Pola1	polymerase (DNA directed), alpha 1
1417239_at	0.0163	0.0002	-4.24959	0.69733	-0.215813	Cetn3	centrin 3
1447935_at	0.0164	0.000201	-4.24636	0.689101	-0.182317	Fancm	Fanconi anemia, complementation group M
1460243_at	0.0164	0.000202	-4.24548	0.686867	-0.260143	Sptlc2	serine palmitoyltransferase, long chain base subunit 2
1424507_at	0.0165	0.000204	4.2413	0.676223	0.243283	Rin1	Ras and Rab interactor 1
1439837_at	0.0165	0.000204	4.24102	0.6755	0.255281	Gigyf2	GRB10 interacting GYF protein 2
1427528_a_at	0.0165	0.000204	-4.24087	0.675128	-0.211103	Epha7	Eph receptor A7
1432513_a_at	0.0166	0.000206	-4.23827	0.668516	-0.203765	1700001C02Rik	RIKEN cDNA 1700001C02 gene
1418408_at	0.0166	0.000206	-4.23727	0.66596	-0.30365	Zfand1	zinc finger, AN1-type domain 1
1449977_at	0.0167	0.000207	4.23545	0.66132	0.234894	Egr4	early growth response 4
1454827_at	0.0168	0.000209	4.23242	0.653613	0.238772	Pogz	pogo transposable element with ZNF domain
1452662_a_at	0.0168	0.000209	4.23216	0.652955	0.147083	Eif2s1	eukaryotic translation initiation factor 2, subunit 1 alpha
1456642_x_at	0.0169	0.000211	4.22972	0.646737	0.241632	S100a10	S100 calcium binding protein A10 (calpactin)
1456833_at	0.017	0.000213	4.22622	0.637841	0.243954	Gpr17	G protein-coupled receptor 17
1434869_at	0.017	0.000214	-4.22447	0.633389	-0.278637	Tdrd3	tudor domain containing 3
1434749_at	0.017	0.000214	-4.2244	0.633207	-0.198804	Mettl25	methyltransferase like 25
1448135_at	0.017	0.000214	4.2239	0.63194	0.132848	Atf4	activating transcription factor 4
1449010_at	0.0172	0.000218	4.2176	0.615891	0.179938	Hspa4l	heat shock protein 4 like
1434993_at	0.0174	0.00022	-4.21335	0.605096	-0.187722	Brinp3	bone morphogenetic protein/retinoic acid inducible neural specific 3
1460553_at	0.0174	0.000221	-4.21268	0.603396	-0.220028	Fam229b	family with sequence similarity 229, member B
1417644_at	0.0175	0.000222	-4.21022	0.597127	-0.336268	Sspn	sarcospan
1437128_a_at	0.0175	0.000223	-4.2088	0.593511	-0.289238	Zfp945	zinc finger protein 945
1416289_at	0.0175	0.000224	4.20811	0.591769	0.239656	Plod1	procollagen-lysine, 2-oxoglutarate 5-dioxygenase 1
1418081_at	0.0175	0.000224	-4.20759	0.590437	-0.141743	Dnajc30	DnaJ heat shock protein family (Hsp40) member C30
1424074_at	0.0176	0.000226	-4.20468	0.583051	-0.2037	Btf3l4	basic transcription factor 3-like 4
1426368_at	0.0177	0.000226	4.2036	0.580306	0.256911	Rin2	Ras and Rab interactor 2
1445106_at	0.0179	0.00023	4.19847	0.567254	0.212442	Gm19816	predicted gene, 19816
1449373_at	0.0179	0.00023	4.19744	0.564654	0.256152	Dnajc3	DnaJ heat shock protein family (Hsp40) member C3
1424885_at	0.0179	0.000231	-4.19653	0.562335	-0.188765	Klhdc8a	kelch domain containing 8A
1416609_at	0.0182	0.000235	-4.19022	0.546306	-0.147619	BC004004	cDNA sequence BC004004
1419591_at	0.0182	0.000235	-4.1896	0.544723	-0.196866	Gsdmc2///Gsdmc	gasdermin C2///gasdermin C
1422256_at	0.0183	0.000237	4.18678	0.537562	0.168763	Sstr2	somatostatin receptor 2
1438982_s_at	0.0183	0.000238	-4.18521	0.533576	-0.287382	Flywch2	FLYWCH family member 2
1428738_a_at	0.0184	0.000239	-4.18376	0.5299	-0.228246	Tmem254b///Tmem254c///Tmem254a	transmembrane protein 254b///transmembrane protein 254c///transmembrane protein 254a
1453126_at	0.0185	0.000241	4.18027	0.521043	0.189319	Lrfn2	leucine rich repeat and fibronectin type III domain containing 2
1417185_at	0.0185	0.000242	4.18014	0.52069	0.234214	Ly6a	lymphocyte antigen 6 complex, locus A
1436100_at	0.0186	0.000244	4.17671	0.511994	0.150436	Sh2d5	SH2 domain containing 5
1435162_at	0.0187	0.000245	4.17504	0.507751	0.213381	Prkg2	protein kinase, cGMP-dependent, type II
1447813_x_at	0.0188	0.000247	-4.17247	0.501237	-0.244279	Sla	src-like adaptor
1434819_at	0.0188	0.000247	-4.17196	0.499922	-0.212123	St6gal2	beta galactoside alpha 2,6 sialyltransferase 2
1436156_at	0.0188	0.000248	4.16981	0.494487	0.195589	Ccar1	cell division cycle and apoptosis regulator 1
1434418_at	0.019	0.000251	4.16583	0.484382	0.223912	Cers6	ceramide synthase 6
1448569_at	0.019	0.000252	4.16459	0.48122	0.247344	Mlec	malectin
1457850_at	0.019	0.000253	-4.16382	0.479268	-0.261566	Gm15496	predicted gene 15496
1450350_a_at	0.019	0.000253	4.16352	0.478523	0.168204	Jdp2	Jun dimerization protein 2
1434489_at	0.019	0.000253	-4.16281	0.476717	-0.221468	Elmo3	engulfment and cell motility 3
1422433_s_at	0.0191	0.000254	-4.16171	0.473912	-0.14073	Idh1	isocitrate dehydrogenase 1 (NADP+), soluble
1428428_at	0.0192	0.000257	-4.15771	0.463772	-0.150024	Abhd11	abhydrolase domain containing 11
1451222_at	0.0192	0.000257	-4.15759	0.463466	-0.155842	Btf3l4	basic transcription factor 3-like 4
1448619_at	0.0192	0.000257	-4.15736	0.462884	-0.207927	Dhcr7	7-dehydrocholesterol reductase
1455847_at	0.0193	0.000259	-4.15454	0.455729	-0.243772	Pak7	p21 protein (Cdc42/Rac)-activated kinase 7
1437087_at	0.0193	0.00026	-4.1538	0.453868	-0.156152	2210408K08Rik	RIKEN cDNA 2210408K08 gene
1459958_at	0.0194	0.000261	-4.1517	0.448544	-0.239303	Rsrc1	arginine/serine-rich coiled-coil 1
1428705_at	0.0196	0.000265	4.14597	0.434019	0.318526	1700007K13Rik	RIKEN cDNA 1700007K13 gene
1433678_at	0.0197	0.000267	-4.1442	0.429515	-0.226178	Pld4	phospholipase D family, member 4
1427785_x_at	0.0197	0.000267	4.14344	0.427584	0.164392	Capn15	calpain 15
1426277_at	0.0197	0.000267	-4.14342	0.427536	-0.214016	Tmem203	transmembrane protein 203
1417065_at	0.0197	0.000267	4.14322	0.427032	0.455654	Egr1	early growth response 1
1423925_at	0.0197	0.000268	4.14159	0.422901	0.242443	Dhx16	DEAH (Asp-Glu-Ala-His) box polypeptide 16
1422768_at	0.0198	0.00027	-4.13949	0.417595	-0.280709	Syncrip	synaptotagmin binding, cytoplasmic RNA interacting protein
1435937_at	0.0198	0.00027	4.13908	0.416543	0.21427	Sptlc2	serine palmitoyltransferase, long chain base subunit 2
1422733_at	0.0198	0.00027	-4.13897	0.416259	-0.208167	Fjx1	four jointed box 1 (Drosophila)
1435930_at	0.0198	0.000271	-4.13843	0.414902	-0.208622	Scaper	S phase cyclin A-associated protein in the ER
1426159_x_at	0.0198	0.000271	-4.13799	0.413783	-0.19326	Tcrb-J	T cell receptor beta, joining region
1428470_at	0.0198	0.000273	-4.13585	0.408366	-0.179759	Exoc2	exocyst complex component 2
1434949_at	0.0198	0.000274	-4.13454	0.405054	-0.239526	Armc8	armadillo repeat containing 8
1436127_at	0.0198	0.000274	4.13441	0.404712	0.198845	Crhbp	corticotropin releasing hormone binding protein
1453002_at	0.0198	0.000274	4.1342	0.40418	0.213629	Sox11	SRY (sex determining region Y)-box 11
1453093_at	0.0201	0.000278	-4.12934	0.391877	-0.202223	Rasgef1c	RasGEF domain family, member 1C
1451507_at	0.0202	0.00028	-4.12691	0.385708	-0.153015	Mef2c	myocyte enhancer factor 2C
1435248_a_at	0.0202	0.00028	4.12594	0.383276	0.232373	Btaf1	B-TFIID TATA-box binding protein associated factor 1
1440225_at	0.0202	0.000281	-4.12459	0.379845	-0.312556	Adgrf5	adhesion G protein-coupled receptor F5
1416795_at	0.0203	0.000282	-4.12316	0.376231	-0.230577	Cryl1	crystallin, lambda 1
1441470_at	0.0205	0.000286	4.11854	0.364522	0.1777	Wdpcp	WD repeat containing planar cell polarity effector
1420405_at	0.0205	0.000286	-4.11836	0.364068	-0.226803	Slco1a4	solute carrier organic anion transporter family, member 1a4
1450569_a_at	0.0206	0.000288	4.11613	0.358442	0.187991	Rbm14	RNA binding motif protein 14
1451243_at	0.0206	0.000288	4.11548	0.356792	0.174846	Rnpep	arginyl aminopeptidase (aminopeptidase B)
1430168_at	0.0208	0.000293	-4.11013	0.343248	-0.267749	Cstad	CSA-conditional, T cell activation-dependent protein
1419162_s_at	0.0208	0.000293	4.10972	0.342198	0.28559	Dnajc3	DnaJ heat shock protein family (Hsp40) member C3
1421821_at	0.0208	0.000294	-4.10885	0.340016	-0.260313	Ldlr	low density lipoprotein receptor
1428700_at	0.0208	0.000294	-4.10809	0.338086	-0.183884	P2ry13	purinergic receptor P2Y, G-protein coupled 13
1452205_x_at	0.0208	0.000294	-4.10806	0.338	-0.203917	LOC665506///Trbv1///Tcrb-J	T-cell receptor beta-2 chain C region-like///T cell receptor beta, variable 1///T cell receptor beta, joining region
1430675_at	0.0208	0.000294	-4.1079	0.3376	-0.175833	2900055J20Rik	RIKEN cDNA 2900055J20 gene
1453782_at	0.0208	0.000295	4.10743	0.336407	0.170561	Ankrd33b	ankyrin repeat domain 33B
1418072_at	0.0208	0.000296	4.10564	0.3319	0.202506	Hist1h2bg///Hist1h2be///Hist1h2bc	histone cluster 1, H2bg///histone cluster 1, H2be///histone cluster 1, H2bc
1446394_at	0.0208	0.000298	-4.10388	0.327444	-0.194725	Oprk1	opioid receptor, kappa 1
1455206_at	0.0208	0.000298	4.10385	0.327364	0.173755	Rps6ka3	ribosomal protein S6 kinase polypeptide 3
1419668_at	0.0208	0.000298	-4.10333	0.326036	-0.16923	Sgcb	sarcoglycan, beta (dystrophin-associated glycoprotein)
1429510_at	0.0208	0.000298	-4.10311	0.325489	-0.226356	2810410L24Rik	RIKEN cDNA 2810410L24 gene
1430068_at	0.0208	0.000299	-4.10246	0.323841	-0.200331	C030011L09Rik	RIKEN cDNA C030011L09 gene
1442018_at	0.0208	0.000299	-4.10177	0.322111	-0.444245	Btg1	B cell translocation gene 1, anti-proliferative
1422893_at	0.0208	0.0003	4.10163	0.321738	0.198376	Sfmbt1	Scm-like with four mbt domains 1
1449001_at	0.0208	0.0003	4.10148	0.32137	0.178594	Ivd	isovaleryl coenzyme A dehydrogenase
1454822_x_at	0.0208	0.0003	-4.10125	0.320794	-0.243895	Apcdd1	adenomatosis polyposis coli down-regulated 1
1425346_at	0.0209	0.000302	-4.09912	0.315387	-0.145005	Zfp318	zinc finger protein 318
1455254_at	0.0209	0.000302	-4.09876	0.314483	-0.202319	Gid8	GID complex subunit 8
1441894_s_at	0.0209	0.000302	4.09837	0.313508	0.191878	Grasp	GRP1 (general receptor for phosphoinositides 1)-associated scaffold protein
1455373_at	0.021	0.000305	4.09527	0.305659	0.205139	Pclo	piccolo (presynaptic cytomatrix protein)
1416655_at	0.021	0.000305	4.09503	0.305062	0.14268	C1galt1c1	C1GALT1-specific chaperone 1
1422967_a_at	0.021	0.000305	-4.09495	0.304848	-0.323413	Tfrc	transferrin receptor
1429958_x_at	0.021	0.000305	-4.09482	0.304531	-0.310199	Haghl	hydroxyacylglutathione hydrolase-like
1433829_a_at	0.0211	0.000307	4.09229	0.298119	0.164645	Hnrnpa2b1	heterogeneous nuclear ribonucleoprotein A2/B1
1434196_at	0.0211	0.000308	4.09139	0.295866	0.207882	Dnaja4	DnaJ heat shock protein family (Hsp40) member A4
1423809_at	0.0211	0.000308	-4.09094	0.294711	-0.229215	Tcf19	transcription factor 19
1439279_at	0.0212	0.00031	-4.08855	0.28868	-0.338875	Cldn34c1	claudin 34C1
1453807_at	0.0212	0.000311	-4.08772	0.286593	-0.223682	6330563C09Rik	RIKEN cDNA 6330563C09 gene
1439172_at	0.0213	0.000314	-4.08483	0.279284	-0.365612	Atp13a5	ATPase type 13A5
1429884_at	0.0215	0.000316	-4.08165	0.271255	-0.218928	Srgap2	SLIT-ROBO Rho GTPase activating protein 2
1428484_at	0.0218	0.000322	4.07566	0.256109	0.205204	Osbpl3	oxysterol binding protein-like 3
1417149_at	0.0218	0.000323	4.07458	0.253378	0.280372	P4ha2	procollagen-proline, 2-oxoglutarate 4-dioxygenase (proline 4-hydroxylase), alpha II polypeptide
1420123_at	0.0218	0.000323	-4.0745	0.253189	-0.18435	Tcta	T cell leukemia translocation altered gene
1435553_at	0.0219	0.000324	4.07289	0.249117	0.281437	Pdzd2	PDZ domain containing 2
1425837_a_at	0.0219	0.000325	4.07217	0.247311	0.209082	Noct	nocturnin
AFFX-TransRecMur/X57349_5_at	0.0219	0.000325	-4.07138	0.245318	-0.266616	Tfrc	transferrin receptor
1439434_x_at	0.0219	0.000326	4.0705	0.243091	0.228396	Sh2d5	SH2 domain containing 5
1449839_at	0.0219	0.000326	-4.07033	0.242656	-0.277333	Casp3	caspase 3
1441989_at	0.022	0.00033	-4.06627	0.232425	-0.268065	Bnip2	BCL2/adenovirus E1B interacting protein 2
1424434_at	0.022	0.00033	-4.066	0.231737	-0.202537	Mettl22	methyltransferase like 22
1423702_at	0.022	0.00033	-4.0659	0.231479	-0.205514	H1f0	H1 histone family, member 0
1416457_at	0.022	0.000331	-4.06561	0.23075	-0.177697	Ddah2	dimethylarginine dimethylaminohydrolase 2
1449343_s_at	0.0221	0.000333	-4.06248	0.22284	-0.155624	Sin3a	transcriptional regulator, SIN3A (yeast)
1460576_at	0.0224	0.000338	-4.05722	0.209588	-0.163444	Exoc6	exocyst complex component 6
1437022_at	0.0225	0.00034	4.05558	0.205451	0.172066	Ubn2	ubinuclein 2
1453081_at	0.0225	0.00034	-4.05509	0.204198	-0.307275	2410022M11Rik	RIKEN cDNA 2410022M11 gene
1416072_at	0.0225	0.00034	-4.05508	0.204191	-0.186891	Cd34	CD34 antigen
1457673_at	0.0225	0.000341	4.05377	0.200884	0.258548	2610005L07Rik	cadherin 11 pseudogene
1419181_at	0.0227	0.000345	4.04964	0.190458	0.141782	Zfp326	zinc finger protein 326
1450522_a_at	0.0227	0.000345	-4.04964	0.190451	-0.199066	H1f0	H1 histone family, member 0
1458470_at	0.0227	0.000346	-4.04857	0.187761	-0.209221	A830082K12Rik	RIKEN cDNA A830082K12 gene
1429224_at	0.0227	0.000347	-4.04783	0.185895	-0.206267	Pnma1	paraneoplastic antigen MA1
1423941_at	0.0229	0.00035	-4.04487	0.17844	-0.147613	Camk2g	calcium/calmodulin-dependent protein kinase II gamma
1433876_at	0.0229	0.000351	-4.0436	0.175231	-0.148726	Lrrc24	leucine rich repeat containing 24
1435630_s_at	0.0229	0.000352	-4.04284	0.17332	-0.139778	Acat2	acetyl-Coenzyme A acetyltransferase 2
1423946_at	0.0229	0.000352	-4.04249	0.172437	-0.211106	Pdlim2	PDZ and LIM domain 2
1434281_at	0.023	0.000353	4.04118	0.169149	0.160063	Dda1	DET1 and DDB1 associated 1
1434516_at	0.023	0.000355	-4.0396	0.165154	-0.18838	Pstk	phosphoseryl-tRNA kinase
1449145_a_at	0.023	0.000355	-4.03927	0.164315	-0.173114	Cav1	caveolin 1, caveolae protein
1419179_at	0.023	0.000356	4.03877	0.163067	0.228528	Txnl4a	thioredoxin-like 4A
1427126_at	0.0231	0.000357	4.03773	0.160446	0.949521	Hspa1b	heat shock protein 1B
1439662_at	0.0232	0.000359	4.03574	0.155419	0.254932	Homer1	homer scaffolding protein 1
1417106_at	0.0234	0.000363	4.03161	0.145027	0.153936	Tpd52l2	tumor protein D52-like 2
1456068_at	0.0234	0.000363	-4.03159	0.14498	-0.155499	Nfasc	neurofascin
1451449_at	0.0234	0.000364	-4.03019	0.14144	-0.162122	Erlec1	endoplasmic reticulum lectin 1
1450084_s_at	0.0234	0.000365	4.02943	0.139525	0.138085	Ivns1abp	influenza virus NS1A binding protein
1446321_at	0.0234	0.000366	-4.0283	0.136679	-0.271165	B230208B08Rik	RIKEN cDNA B230208B08 gene
1417439_at	0.0234	0.000367	-4.02761	0.13496	-0.172911	Cd248	CD248 antigen, endosialin
1455216_at	0.0235	0.000368	-4.02639	0.131887	-0.185965	Paqr6	progestin and adipoQ receptor family member VI
1448892_at	0.0235	0.000368	-4.02594	0.130742	-0.157564	Dock7	dedicator of cytokinesis 7
1455301_at	0.0235	0.00037	4.02393	0.125681	0.219628	Wipf3	WAS/WASL interacting protein family, member 3
1451462_a_at	0.0235	0.000371	-4.02328	0.124055	-0.171478	Ifnar2	interferon (alpha and beta) receptor 2
1430626_at	0.0235	0.000371	4.02327	0.124027	0.181377	Zfp398	zinc finger protein 398
1434745_at	0.0235	0.000372	4.02266	0.122489	0.197865	Ccnd2	cyclin D2
1449868_at	0.0237	0.000375	4.01944	0.114377	0.202942	Tbx6	T-box 6
1429458_at	0.0237	0.000375	4.01922	0.113838	0.141801	Carnmt1	carnosine N-methyltransferase 1
1434919_at	0.0237	0.000377	-4.0175	0.109491	-0.246059	Agps	alkylglycerone phosphate synthase
1435367_at	0.0237	0.000378	4.01632	0.106526	0.212572	Mapk4	mitogen-activated protein kinase 4
1417603_at	0.0237	0.000378	4.01615	0.106103	0.356478	Per2	period circadian clock 2
1434447_at	0.0237	0.000378	-4.01612	0.106029	-0.209414	Met	met proto-oncogene
1454795_at	0.0238	0.000379	-4.01518	0.103652	-0.213692	Cobll1	Cobl-like 1
1437929_at	0.0238	0.00038	-4.01434	0.101543	-0.163097	Dact2	dishevelled-binding antagonist of beta-catenin 2
1435198_at	0.0238	0.000382	-4.01305	0.098303	-0.220925	Gm5817	predicted gene 5817
1418212_at	0.0239	0.000383	-4.01145	0.094269	-0.144461	Omg	oligodendrocyte myelin glycoprotein
1424383_at	0.0239	0.000384	-4.01084	0.092734	-0.188403	Tmem51	transmembrane protein 51
1436200_at	0.0239	0.000385	4.00991	0.090397	0.236725	Lonrf3	LON peptidase N-terminal domain and ring finger 3
1434399_at	0.0239	0.000385	-4.0099	0.09038	-0.209903	Galnt6	UDP-N-acetyl-alpha-D-galactosamine:polypeptide N-acetylgalactosaminyltransferase 6
1416173_at	0.024	0.000387	4.00812	0.085893	0.193459	Pes1	pescadillo ribosomal biogenesis factor 1
1455134_at	0.024	0.000387	-4.00796	0.085496	-0.198306	Tmem245	transmembrane protein 245
1416505_at	0.024	0.000387	4.00768	0.084808	0.460852	Nr4a1	nuclear receptor subfamily 4, group A, member 1
1439630_x_at	0.0241	0.000391	-4.00439	0.076522	-0.197113	Sbsn	suprabasin
1426361_at	0.0241	0.000391	4.00405	0.075672	0.172091	Zbed6///Zc3h11a	zinc finger, BED type containing 6///zinc finger CCCH type containing 11A
1451469_at	0.0241	0.000391	-4.00379	0.075024	-0.221169	Cntln	centlein, centrosomal protein
1452631_at	0.0244	0.000397	-3.99879	0.062454	-0.294136	Rufy2	RUN and FYVE domain-containing 2
1441142_at	0.0244	0.000398	-3.99722	0.058507	-0.312063	Smc2os	structural maintenance of chromosomes 2, opposite strand
1437310_at	0.0246	0.000401	3.99486	0.052564	0.172212	Bbs1	Bardet-Biedl syndrome 1 (human)
1435044_at	0.0246	0.000402	-3.9935	0.049151	-0.235775	Ebf4	early B cell factor 4
1438408_at	0.0248	0.000406	3.99062	0.041922	0.178623	Sowahb	sosondowah ankyrin repeat domain family member B
1453308_at	0.0248	0.000407	-3.98974	0.039699	-0.192064	8430429K09Rik	RIKEN cDNA 8430429K09 gene
1416029_at	0.0248	0.000407	3.98932	0.038648	0.34191	Klf10	Kruppel-like factor 10
1429239_a_at	0.0248	0.000408	-3.98842	0.036385	-0.226138	Stard4	StAR-related lipid transfer (START) domain containing 4
1417858_at	0.025	0.000411	-3.98606	0.030465	-0.204882	Rasal1	RAS protein activator like 1 (GAP1 like)
1423942_a_at	0.0251	0.000415	-3.98193	0.020082	-0.119592	Camk2g	calcium/calmodulin-dependent protein kinase II gamma
1451190_a_at	0.0252	0.000417	3.98082	0.01731	0.202997	Sbk1	SH3-binding kinase 1
1455625_at	0.0252	0.000418	3.97963	0.014321	0.23446	Taf10	TATA-box binding protein associated factor 10
1417339_a_at	0.0252	0.000419	3.97897	0.012657	0.223049	Dynll1	dynein light chain LC8-type 1
1434416_a_at	0.0253	0.00042	3.97741	0.008732	0.207094	Capn15	calpain 15
1433503_at	0.0253	0.000421	-3.97705	0.00783	-0.169192	Ptgr2	prostaglandin reductase 2
1450383_at	0.0253	0.000422	-3.97644	0.006317	-0.247549	Ldlr	low density lipoprotein receptor
1435407_at	0.0253	0.000422	-3.97629	0.005927	-0.211445	Zkscan16	zinc finger with KRAB and SCAN domains 16
1416122_at	0.0254	0.000425	3.97372	-0.000515	0.190843	Ccnd2	cyclin D2
1426690_a_at	0.0257	0.000431	-3.96865	-0.013246	-0.182086	Srebf1	sterol regulatory element binding transcription factor 1
1419350_at	0.0257	0.000432	-3.96754	-0.016038	-0.196164	Hook2	hook microtubule tethering protein 2
1454232_at	0.0257	0.000432	-3.9675	-0.016127	-0.354232	9430027B09Rik	RIKEN cDNA 9430027B09 gene
1425109_at	0.0259	0.000435	3.96461	-0.023382	0.16157	Slc44a3	solute carrier family 44, member 3
1457843_at	0.0259	0.000435	-3.9645	-0.023662	-0.252277	Lypd6	LY6/PLAUR domain containing 6
1460289_at	0.0259	0.000436	-3.96404	-0.024809	-0.203289	Nrg3	neuregulin 3
1440357_at	0.026	0.00044	-3.96102	-0.032386	-0.18252	Lncppara	long noncoding RNA near Ppara
1426733_at	0.026	0.00044	3.96063	-0.033353	0.147356	Itpk1	inositol 1,3,4-triphosphate 5/6 kinase
1428432_at	0.026	0.00044	3.96041	-0.033898	0.218216	Zcchc24	zinc finger, CCHC domain containing 24
1452911_at	0.0263	0.000445	3.95643	-0.043884	0.214766	Spred1	sprouty protein with EVH-1 domain 1, related sequence
1454780_at	0.0263	0.000446	3.95567	-0.045783	0.131974	Galnt18	UDP-N-acetyl-alpha-D-galactosamine:polypeptide N-acetylgalactosaminyltransferase 18
1418687_at	0.0263	0.000448	3.95425	-0.049353	0.855569	Arc	activity regulated cytoskeletal-associated protein
1458425_at	0.0263	0.000448	-3.954	-0.049983	-0.135409	A430046D13Rik	Riken cDNA A430046D13 gene
1451210_at	0.0263	0.000448	-3.95387	-0.050313	-0.187227	Plpp2	phospholipid phosphatase 2
1428674_at	0.0263	0.000449	3.95326	-0.051825	0.166976	Prpf38b	PRP38 pre-mRNA processing factor 38 (yeast) domain containing B
1434945_at	0.0264	0.00045	-3.95205	-0.054857	-0.231095	Lpcat2	lysophosphatidylcholine acyltransferase 2
1454993_a_at	0.0264	0.000451	3.95129	-0.056763	0.140221	Srsf3	serine/arginine-rich splicing factor 3
1452132_at	0.0264	0.000453	-3.95022	-0.059454	-0.160119	Tlcd1	TLC domain containing 1
1420093_s_at	0.0264	0.000453	-3.95006	-0.059862	-0.269686	Hnrnpdl	heterogeneous nuclear ribonucleoprotein D-like
1441685_at	0.0265	0.000454	3.94891	-0.062731	0.29771	Prosc	proline synthetase co-transcribed
1454067_a_at	0.0265	0.000455	-3.94853	-0.063682	-0.190795	4931406C07Rik	RIKEN cDNA 4931406C07 gene
1460399_at	0.0265	0.000456	3.94752	-0.066221	0.228803	Ccdc117	coiled-coil domain containing 117
1439143_at	0.0265	0.000457	3.9471	-0.067271	0.381735	A930018M24Rik	RIKEN cDNA A930018M24 gene
1426455_at	0.0266	0.000459	-3.94507	-0.07236	-0.183427	Cwc27	CWC27 spliceosome-associated protein
1455207_at	0.0267	0.000462	-3.94305	-0.077403	-0.167579	Ptrhd1	peptidyl-tRNA hydrolase domain containing 1
1430050_at	0.0275	0.000477	3.93108	-0.107386	0.128033	Ddx23	DEAD (Asp-Glu-Ala-Asp) box polypeptide 23
1435852_at	0.0275	0.000478	3.93037	-0.109155	0.168167	Spred3	sprouty-related, EVH1 domain containing 3
1435917_at	0.0275	0.000478	3.93031	-0.109305	0.164537	Ociad2	OCIA domain containing 2
1431428_a_at	0.0275	0.000479	-3.92971	-0.110816	-0.20014	Nosip	nitric oxide synthase interacting protein
1453238_s_at	0.0275	0.000479	3.92955	-0.111221	0.300928	3930401B19Rik	RIKEN cDNA 3930401B19 gene
1435631_x_at	0.0275	0.00048	-3.92886	-0.112941	-0.255459	Exoc6///Sh3glb1	exocyst complex component 6///SH3-domain GRB2-like B1 (endophilin)
1428338_at	0.0275	0.000481	3.92818	-0.114635	0.181753	Spata2l	spermatogenesis associated 2-like
1454920_at	0.0277	0.000485	3.9249	-0.122845	0.178384	Uhrf2	ubiquitin-like, containing PHD and RING finger domains 2
1427002_s_at	0.0277	0.000486	-3.92427	-0.124413	-0.250663	Arsg	arylsulfatase G
1434868_at	0.0277	0.000486	-3.92419	-0.12462	-0.204373	4933431E20Rik	RIKEN cDNA 4933431E20 gene
1416364_at	0.0277	0.000487	3.92314	-0.127242	0.131501	Hsp90ab1	heat shock protein 90 alpha (cytosolic), class B member 1
1450344_a_at	0.0277	0.000488	-3.92282	-0.128045	-0.186504	Ptger3	prostaglandin E receptor 3 (subtype EP3)
1434537_at	0.0279	0.000491	3.92047	-0.133918	0.163465	Slco3a1	solute carrier organic anion transporter family, member 3a1
1420171_s_at	0.0279	0.000491	3.92022	-0.134534	0.224693	Myh9	myosin, heavy polypeptide 9, non-muscle
1443618_at	0.028	0.000494	3.91787	-0.140419	0.210212	LOC102642479///Pdzd2	uncharacterized LOC102642479///PDZ domain containing 2
1415756_a_at	0.028	0.000495	-3.91766	-0.140947	-0.135032	Snapin	SNAP-associated protein
1437528_x_at	0.0282	0.000498	-3.91472	-0.148303	-0.203691	A730017C20Rik	RIKEN cDNA A730017C20 gene
1436335_at	0.0282	0.0005	3.91364	-0.151	0.168155	Plch2	phospholipase C, eta 2
1417520_at	0.0283	0.000501	-3.91268	-0.153411	-0.277064	Nfe2l3	nuclear factor, erythroid derived 2, like 3
1447112_s_at	0.0283	0.000502	-3.9118	-0.1556	-0.186612	Cryl1	crystallin, lambda 1
1427089_at	0.0283	0.000503	3.91111	-0.157322	0.182058	Ccnt2	cyclin T2
1452258_at	0.0284	0.000505	-3.90996	-0.1602	-0.212584	Phf20	PHD finger protein 20
1424381_at	0.0284	0.000507	-3.90879	-0.163119	-0.201235	Sugp1	SURP and G patch domain containing 1
1436763_a_at	0.0285	0.00051	3.90625	-0.169464	0.304013	Klf9	Kruppel-like factor 9
1418139_at	0.0286	0.000511	-3.9056	-0.171087	-0.203809	Dcx	doublecortin
1423828_at	0.0286	0.000512	-3.905	-0.172594	-0.154832	Fasn	fatty acid synthase
1423747_a_at	0.0287	0.000514	-3.90313	-0.177264	-0.263215	Pdk1	pyruvate dehydrogenase kinase, isoenzyme 1
1428677_at	0.0287	0.000515	-3.90283	-0.178003	-0.164455	Wdr73	WD repeat domain 73
1438456_at	0.0287	0.000516	3.90229	-0.179356	0.20747	H13	histocompatibility 13
1450111_a_at	0.0287	0.000516	-3.90179	-0.1806	-0.186934	Nudt8	nudix (nucleoside diphosphate linked moiety X)-type motif 8
1436093_at	0.0287	0.000518	3.90068	-0.183386	0.145671	Epha10	Eph receptor A10
1415993_at	0.0287	0.000519	-3.89997	-0.185158	-0.146831	Sqle	squalene epoxidase
1448439_at	0.0287	0.00052	-3.89941	-0.186555	-0.177696	Mydgf	myeloid derived growth factor
1454283_at	0.0287	0.00052	3.89917	-0.187152	0.207919	Slc38a9	solute carrier family 38, member 9
1418442_at	0.0287	0.000521	3.89865	-0.188444	0.163851	Xpo1	exportin 1
1434793_at	0.0287	0.000521	3.89862	-0.18852	0.231825	Wdr78	WD repeat domain 78
1453188_at	0.0287	0.000522	-3.89793	-0.190254	-0.24823	6230424C14Rik	RIKEN cDNA 6230424C14 gene
1449070_x_at	0.0288	0.000525	-3.89593	-0.195228	-0.215604	Apcdd1	adenomatosis polyposis coli down-regulated 1
1417455_at	0.0289	0.000525	3.89526	-0.196911	0.205543	Tgfb3	transforming growth factor, beta 3
1434033_at	0.0289	0.000527	-3.89389	-0.200329	-0.155672	Tle1	transducin-like enhancer of split 1
1424133_at	0.0289	0.000528	-3.89355	-0.201171	-0.208165	Tmem98	transmembrane protein 98
1418802_at	0.0289	0.000529	-3.89304	-0.202446	-0.202587	R74862	expressed sequence R74862
1452805_at	0.0289	0.00053	-3.89243	-0.203976	-0.235638	D11Wsu47e	DNA segment, Chr 11, Wayne State University 47, expressed
1418150_at	0.0292	0.000535	3.88889	-0.212804	0.206458	Mtmr4	myotubularin related protein 4
1424160_at	0.0294	0.000538	-3.88624	-0.219425	-0.202168	Alg5	asparagine-linked glycosylation 5 (dolichyl-phosphate beta-glucosyltransferase)
1456828_at	0.0294	0.00054	3.88527	-0.221839	0.315821	C030023E24Rik	RIKEN cDNA C030023E24 gene
1440226_at	0.0294	0.00054	3.88497	-0.222594	0.184893	Zfp760	zinc finger protein 760
1439240_x_at	0.0294	0.000541	-3.88427	-0.224346	-0.151639	Lin7b	lin-7 homolog B (C. elegans)
1417301_at	0.0294	0.000543	-3.88333	-0.226669	-0.191544	Fzd6	frizzled class receptor 6
1417834_at	0.0294	0.000543	3.88306	-0.227354	0.171529	Synj2bp	synaptojanin 2 binding protein
1430292_a_at	0.0297	0.000549	-3.87883	-0.23789	-0.165466	Smim8	small integral membrane protein 8
1424877_a_at	0.0298	0.000551	-3.87776	-0.240569	-0.16925	Alad	aminolevulinate, delta-, dehydratase
1427359_at	0.0298	0.000552	3.8774	-0.24147	0.264138	Kdm7a	lysine (K)-specific demethylase 7A
1454671_at	0.0298	0.000554	-3.87545	-0.246324	-0.2662	Insig1	insulin induced gene 1
1454056_at	0.0298	0.000555	-3.87535	-0.246576	-0.234157	9030407P20Rik	RIKEN cDNA 9030407P20 gene
1460495_s_at	0.0299	0.000557	-3.87363	-0.250871	-0.215145	Htra2	HtrA serine peptidase 2
1437199_at	0.0299	0.000558	3.87299	-0.252446	0.178702	Dusp5	dual specificity phosphatase 5
1452388_at	0.0299	0.000559	3.87236	-0.254032	0.388393	Hspa1a	heat shock protein 1A
1434346_at	0.0299	0.00056	-3.8719	-0.25518	-0.190163	Rufy2	RUN and FYVE domain-containing 2
1426612_at	0.0299	0.00056	-3.87165	-0.255791	-0.272914	Tipin	timeless interacting protein
1426094_at	0.0299	0.00056	-3.87159	-0.255954	-0.130944	Rhbdl1	rhomboid, veinlet-like 1 (Drosophila)
1429214_at	0.03	0.000562	-3.87072	-0.258116	-0.161162	Adamtsl2	ADAMTS-like 2
1440220_at	0.03	0.000564	3.86919	-0.261933	0.230093	Ocln	occludin
1423596_at	0.03	0.000564	-3.86898	-0.262458	-0.14724	Nek6	NIMA (never in mitosis gene a)-related expressed kinase 6
1424981_at	0.03	0.000565	-3.86874	-0.263048	-0.291719	Nln	neurolysin (metallopeptidase M3 family)
1436509_at	0.03	0.000565	3.86866	-0.26325	0.169471	Mlec	malectin
1421430_at	0.0301	0.000567	-3.86706	-0.26723	-0.196647	Rad51b	RAD51 paralog B
1418333_at	0.0304	0.000574	3.86294	-0.277502	0.151384	Mtf1	metal response element binding transcription factor 1
1446771_at	0.0304	0.000574	3.86249	-0.278613	0.22576	Tuba8	tubulin, alpha 8
1452046_a_at	0.0304	0.000575	3.86215	-0.279454	0.112534	Ppp1cc	protein phosphatase 1, catalytic subunit, gamma isoform
1460391_at	0.0305	0.000577	-3.86075	-0.282945	-0.243693	Ola1	Obg-like ATPase 1
1458440_at	0.0305	0.000578	3.86005	-0.284686	0.191336	Specc1	sperm antigen with calponin homology and coiled-coil domains 1
1456233_at	0.0305	0.000579	-3.85912	-0.287007	-0.247855	Tmem196	transmembrane protein 196
1436037_at	0.0305	0.00058	-3.85851	-0.288515	-0.146223	Itga4	integrin alpha 4
1448199_at	0.0307	0.000584	3.85636	-0.293884	0.162535	Ankrd10	ankyrin repeat domain 10
1448890_at	0.0307	0.000585	3.8557	-0.295509	0.372023	Klf2	Kruppel-like factor 2 (lung)
1456538_at	0.0307	0.000586	3.8551	-0.297019	0.187017	Sdccag8	serologically defined colon cancer antigen 8
1451624_a_at	0.0308	0.000587	3.85419	-0.299289	0.191656	Phospho2	phosphatase, orphan 2
1421088_at	0.0309	0.000591	-3.85175	-0.305349	-0.194527	Gpc4	glypican 4
1427129_a_at	0.0311	0.000596	-3.84853	-0.313359	-0.16943	Hnrnpr	heterogeneous nuclear ribonucleoprotein R
1422552_at	0.0314	0.000603	-3.84468	-0.322948	-0.159939	Rprm	reprimo, TP53 dependent G2 arrest mediator candidate
1429223_a_at	0.0314	0.000604	-3.84372	-0.325325	-0.15667	Hfe2	hemochromatosis type 2 (juvenile)
1424457_at	0.0314	0.000606	-3.84265	-0.327989	-0.132162	Apbb3	amyloid beta (A4) precursor protein-binding, family B, member 3
1434304_s_at	0.0314	0.000606	3.84262	-0.328072	0.125862	Nus1	NUS1 dehydrodolichyl diphosphate synthase subunit
1423248_at	0.0314	0.000607	3.84192	-0.329801	0.205076	Nktr	natural killer tumor recognition sequence
1427941_at	0.0314	0.000607	-3.84171	-0.330321	-0.207853	Dicer1	dicer 1, ribonuclease type III
1436240_at	0.0315	0.000608	3.84119	-0.331618	0.212615	B230214O09Rik	RIKEN cDNA B230214O09 gene
1434518_at	0.0315	0.000609	-3.84053	-0.333255	-0.189942	Phka2	phosphorylase kinase alpha 2
1429251_at	0.0315	0.000611	-3.83973	-0.335243	-0.220325	Prdm2	PR domain containing 2, with ZNF domain
1433975_at	0.0315	0.000611	-3.83945	-0.33594	-0.150145	Cdk10	cyclin-dependent kinase 10
1418443_at	0.0316	0.000614	3.83794	-0.339688	0.166962	Xpo1	exportin 1
1426915_at	0.0316	0.000614	3.83739	-0.341068	0.164124	Dapk1	death associated protein kinase 1
1423723_s_at	0.0318	0.000619	3.83443	-0.34842	0.193746	Tardbp	TAR DNA binding protein
1452381_at	0.0319	0.000623	3.83246	-0.353325	0.195469	Creb3l2	cAMP responsive element binding protein 3-like 2
1423044_at	0.0319	0.000624	3.83185	-0.354837	0.122753	Prosc	proline synthetase co-transcribed
1439884_at	0.032	0.000625	-3.83119	-0.356465	-0.19418	Nudt16	nudix (nucleoside diphosphate linked moiety X)-type motif 16
1429637_at	0.0321	0.000628	-3.8296	-0.360426	-0.260296	Fam198b	family with sequence similarity 198, member B
1424717_at	0.0321	0.000628	3.82913	-0.361585	0.162797	Mis12	MIS12 kinetochore complex component
1424271_at	0.0321	0.00063	3.82789	-0.364664	0.150732	Dclk1	doublecortin-like kinase 1
1456435_at	0.0321	0.000631	-3.82758	-0.365443	-0.255145	Morn1	MORN repeat containing 1
1457052_at	0.0321	0.000632	3.82719	-0.366422	0.280132	Kcng1	potassium voltage-gated channel, subfamily G, member 1
1427251_at	0.0324	0.00064	3.8226	-0.377812	0.219665	Atp2a2	ATPase, Ca++ transporting, cardiac muscle, slow twitch 2
1429680_at	0.0327	0.000647	3.81853	-0.387916	0.215211	Tra2a	transformer 2 alpha homolog (Drosophila)
1417061_at	0.0328	0.000648	-3.81786	-0.389584	-0.226079	Slc40a1	solute carrier family 40 (iron-regulated transporter), member 1
1423182_at	0.0329	0.00065	-3.81628	-0.393487	-0.154854	Tnfrsf13b	tumor necrosis factor receptor superfamily, member 13b
1437268_at	0.0329	0.000653	3.81497	-0.396758	0.184637	Lancl3	LanC lantibiotic synthetase component C-like 3 (bacterial)
1438180_x_at	0.033	0.000656	3.81331	-0.400865	0.155891	Hax1	HCLS1 associated X-1
1426165_a_at	0.0331	0.000658	-3.81201	-0.404098	-0.255988	Casp3	caspase 3
1434434_s_at	0.0332	0.000661	-3.81052	-0.407777	-0.171074	Tcerg1	transcription elongation regulator 1 (CA150)
1417602_at	0.0333	0.000662	3.80973	-0.40975	0.47008	Per2	period circadian clock 2
1441693_at	0.0334	0.000666	-3.80753	-0.415205	-0.195965	Adamts3	a disintegrin-like and metallopeptidase (reprolysin type) with thrombospondin type 1 motif, 3
1454742_at	0.0334	0.000668	-3.80665	-0.417398	-0.21779	Rasgef1b	RasGEF domain family, member 1B
1429274_at	0.0334	0.000668	-3.8066	-0.417518	-0.178985	Lypd6b	LY6/PLAUR domain containing 6B
1428985_at	0.0334	0.000668	3.80626	-0.418366	0.161385	Ints12	integrator complex subunit 12
1430753_at	0.0334	0.00067	-3.80509	-0.421251	-0.189763	Dnhd1	dynein heavy chain domain 1
1426726_at	0.0334	0.000671	3.805	-0.421472	0.161882	Gm8801///Ppp1r10	protein phosphatase 1, regulatory subunit 10 pseudogene///protein phosphatase 1, regulatory subunit 10
1436604_at	0.0334	0.000671	3.80462	-0.422418	0.255708	Ttll3	tubulin tyrosine ligase-like family, member 3
1457335_at	0.0334	0.000672	-3.80448	-0.422766	-0.196634	Gm16794	predicted gene, 16794
1435034_at	0.0336	0.000675	-3.80232	-0.428112	-0.240482	Rpap2	RNA polymerase II associated protein 2
1432431_s_at	0.0336	0.000676	3.80177	-0.429496	0.277381	Macrod2	MACRO domain containing 2
1425059_at	0.0336	0.000677	-3.8013	-0.430663	-0.20477	Prmt6	protein arginine N-methyltransferase 6
1417161_at	0.0336	0.000678	3.80086	-0.43175	0.199915	Cdk2ap2	CDK2-associated protein 2
1445710_x_at	0.0336	0.000679	-3.80058	-0.432436	-0.296899	Duxbl3///Duxbl2///Duxbl1	double homeobox B-like 3///double homeobox B-like 2///double homeobox B-like 1
1424268_at	0.0339	0.000687	3.79629	-0.443072	0.183854	Smox	spermine oxidase
1454018_at	0.0339	0.000687	-3.79591	-0.444017	-0.182689	Tlk2	tousled-like kinase 2 (Arabidopsis)
1429573_at	0.034	0.000689	-3.79489	-0.446526	-0.258201	Dmrtc1a	DMRT-like family C1a
1416762_at	0.034	0.000691	3.79363	-0.449661	0.153222	S100a10	S100 calcium binding protein A10 (calpactin)
1439766_x_at	0.0341	0.000693	-3.7928	-0.451705	-0.207721	Vegfc	vascular endothelial growth factor C
1452423_at	0.0341	0.000694	3.79233	-0.452868	0.239394	Pclo	piccolo (presynaptic cytomatrix protein)
1436088_at	0.0341	0.000695	-3.79185	-0.454054	-0.182191	Fam49b	family with sequence similarity 49, member B
1424610_at	0.0341	0.000695	-3.7918	-0.454183	-0.222104	Trub2	TruB pseudouridine (psi) synthase family member 2
1419700_a_at	0.0341	0.000695	-3.79154	-0.454828	-0.185065	Prom1	prominin 1
1444592_at	0.0341	0.000697	3.79063	-0.45709	0.190298	Osgep	O-sialoglycoprotein endopeptidase
1438065_at	0.0341	0.000698	-3.79034	-0.457802	-0.274881	Rprd1a	regulation of nuclear pre-mRNA domain containing 1A
1435458_at	0.0342	0.0007	3.78921	-0.460595	0.244846	Pim1	proviral integration site 1
1450733_at	0.0342	0.0007	3.78881	-0.461591	0.145627	Bicd2	bicaudal D homolog 2 (Drosophila)
1437518_at	0.0342	0.000701	3.78828	-0.462913	0.277572	Gm2694	predicted gene 2694
1448145_at	0.0342	0.000703	-3.78728	-0.46539	-0.196726	Wwp2	WW domain containing E3 ubiquitin protein ligase 2
1452015_at	0.0345	0.000709	-3.78423	-0.472923	-0.194928	6330416G13Rik	RIKEN cDNA 6330416G13 gene
1426243_at	0.0345	0.000711	3.78337	-0.475058	0.271591	Cth	cystathionase (cystathionine gamma-lyase)
1448497_at	0.0345	0.000711	-3.78325	-0.47537	-0.161664	Ercc3	excision repair cross-complementing rodent repair deficiency, complementation group 3
1429170_a_at	0.0345	0.000712	-3.78296	-0.476072	-0.197573	Mtf1	metal response element binding transcription factor 1
1447878_s_at	0.0345	0.000714	-3.78193	-0.47862	-0.152259	Fgfrl1	fibroblast growth factor receptor-like 1
1426691_at	0.0346	0.000716	3.78082	-0.481371	0.168376	Tjap1	tight junction associated protein 1
1418715_at	0.0346	0.000716	3.78051	-0.482143	0.196132	Pank1	pantothenate kinase 1
1436969_at	0.0348	0.000721	-3.77794	-0.488508	-0.180633	Erich3	glutamate rich 3
1426312_at	0.0348	0.000723	-3.77711	-0.490562	-0.151329	Bre	brain and reproductive organ-expressed protein
1434376_at	0.0348	0.000723	-3.77688	-0.491133	-0.214703	Cd44	CD44 antigen
1443969_at	0.0348	0.000724	3.77657	-0.49188	0.240282	Irs2	insulin receptor substrate 2
1452257_at	0.0348	0.000725	-3.77608	-0.493094	-0.16984	Bdh1	3-hydroxybutyrate dehydrogenase, type 1
1424611_x_at	0.0349	0.000728	-3.77467	-0.496585	-0.167666	Trub2	TruB pseudouridine (psi) synthase family member 2
1459897_a_at	0.0349	0.000729	-3.77406	-0.498085	-0.153145	Sbsn	suprabasin
1416357_a_at	0.035	0.000731	-3.77298	-0.500769	-0.224767	Mcam	melanoma cell adhesion molecule
1460644_at	0.035	0.000734	-3.7715	-0.504435	-0.203425	Bckdk	branched chain ketoacid dehydrogenase kinase
1435959_at	0.035	0.000734	-3.77138	-0.504724	-0.216827	Arhgap15	Rho GTPase activating protein 15
1419845_at	0.035	0.000734	3.77129	-0.50495	0.242334	Dlx1as	distal-less homeobox 1, antisense
1434855_at	0.0352	0.000738	-3.76918	-0.510173	-0.185704	Amdhd2	amidohydrolase domain containing 2
1428281_at	0.0352	0.00074	-3.76853	-0.511767	-0.183336	Trub1	TruB pseudouridine (psi) synthase family member 1
1453332_at	0.0352	0.00074	-3.7684	-0.512105	-0.285969	Trappc13	trafficking protein particle complex 13
1458112_at	0.0352	0.000741	-3.76813	-0.512762	-0.207341	Adarb2	adenosine deaminase, RNA-specific, B2
1417273_at	0.0356	0.00075	3.76327	-0.524783	0.272196	Pdk4	pyruvate dehydrogenase kinase, isoenzyme 4
1448023_at	0.0356	0.000751	3.76274	-0.526094	0.219403	Kalrn	kalirin, RhoGEF kinase
1421935_at	0.0356	0.000753	-3.76186	-0.528263	-0.214603	Rps20	ribosomal protein S20
1440112_at	0.0358	0.000757	3.76006	-0.532701	0.180959	Lrrtm3	leucine rich repeat transmembrane neuronal 3
1435704_at	0.0359	0.000759	-3.75873	-0.535997	-0.478997	C920006O11Rik	RIKEN cDNA C920006O11 gene
1452540_a_at	0.0359	0.000761	3.75788	-0.538093	0.157701	Hist1h2br///Hist1h2bq///Hist1h2bp///Hist1h2bn///Hist1h2bm///Hist1h2bl///Hist1h2bj///Hist1h2bg///Hist1h2bf///Hist1h2be///Hist1h2bc	histone cluster 1 H2br///histone cluster 1, H2bq///histone cluster 1, H2bp///histone cluster 1, H2bn///histone cluster 1, H2bm///histone cluster 1, H2bl///histone cluster 1, H2bj///histone cluster 1, H2bg///histone cluster 1, H2bf///histone cluster 1, H2be///histone cluster 1, H2bc
1452030_a_at	0.0359	0.000761	-3.75774	-0.538424	-0.195214	Hnrnpr	heterogeneous nuclear ribonucleoprotein R
1416698_a_at	0.0359	0.000762	-3.75746	-0.539119	-0.184927	Cks1b	CDC28 protein kinase 1b
1435867_at	0.0359	0.000765	3.75624	-0.542136	0.194707	Kdm7a	lysine (K)-specific demethylase 7A
1436547_at	0.0359	0.000765	-3.75598	-0.542786	-0.165634	Dgke	diacylglycerol kinase, epsilon
1426474_at	0.0359	0.000766	-3.75558	-0.543775	-0.130449	Atpaf2	ATP synthase mitochondrial F1 complex assembly factor 2
1424838_at	0.0365	0.00078	-3.74894	-0.560161	-0.17656	Ncmap	noncompact myelin associated protein
1417501_at	0.0365	0.000781	-3.74851	-0.561219	-0.164479	Fbxo6	F-box protein 6
1435158_at	0.0365	0.000781	3.74846	-0.56135	0.367189	Rbm12b1	RNA binding motif protein 12 B1
1436404_at	0.0365	0.000783	-3.74755	-0.563592	-0.255825	Tlcd1	TLC domain containing 1
1448729_a_at	0.0365	0.000783	-3.74718	-0.564504	-0.146979	Sept4	septin 4
1430464_at	0.0365	0.000784	-3.74704	-0.564852	-0.231386	9430021M05Rik	RIKEN cDNA 9430021M05 gene
1418025_at	0.0366	0.000786	3.74607	-0.56724	0.17843	Bhlhe40	basic helix-loop-helix family, member e40
1437716_x_at	0.0367	0.000789	-3.7446	-0.570867	-0.190729	Kif22	kinesin family member 22
1436071_at	0.0367	0.000791	3.74354	-0.573493	0.150245	Ankrd26	ankyrin repeat domain 26
1435056_x_at	0.0369	0.000795	3.7418	-0.577773	0.235459	Pofut2	protein O-fucosyltransferase 2
1434951_at	0.0369	0.000797	-3.74088	-0.580047	-0.197075	Armc8	armadillo repeat containing 8
1454086_a_at	0.0369	0.000797	-3.74056	-0.580849	-0.192228	Lmo2	LIM domain only 2
1425896_a_at	0.037	0.0008	-3.73951	-0.583436	-0.196179	Fbn1	fibrillin 1
1451361_a_at	0.037	0.000802	3.73859	-0.585692	0.194918	Pnpla7	patatin-like phospholipase domain containing 7
1419903_at	0.0371	0.000804	3.7374	-0.588626	0.184719	Dbndd2	dysbindin (dystrobrevin binding protein 1) domain containing 2
1436735_at	0.0371	0.000804	-3.73733	-0.588815	-0.252013	Nsun3	NOL1/NOP2/Sun domain family member 3
1442614_at	0.0371	0.000805	3.73725	-0.589011	0.234952	Il1rap	interleukin 1 receptor accessory protein
1428972_at	0.0371	0.000807	-3.73633	-0.591281	-0.214851	Tctex1d2	Tctex1 domain containing 2
1426641_at	0.0373	0.000811	3.7341	-0.596778	0.216439	Trib2	tribbles pseudokinase 2
1417405_at	0.0373	0.000813	3.7333	-0.598752	0.127227	Stard3	START domain containing 3
1432195_s_at	0.0373	0.000813	3.73322	-0.598948	0.169466	Ccnl2	cyclin L2
1425455_a_at	0.0373	0.000814	-3.7329	-0.599726	-0.173046	Churc1	churchill domain containing 1
1452199_at	0.0373	0.000814	-3.73283	-0.599913	-0.13573	Tmem209	transmembrane protein 209
1430128_a_at	0.0373	0.000815	-3.73224	-0.60135	-0.177993	Reep6	receptor accessory protein 6
1421037_at	0.0376	0.000823	3.72874	-0.609974	0.189113	Npas2	neuronal PAS domain protein 2
1434520_at	0.0376	0.000823	3.72871	-0.610059	0.152926	Sc5d	sterol-C5-desaturase
1419130_at	0.0376	0.000826	-3.72762	-0.612736	-0.245838	Adat2	adenosine deaminase, tRNA-specific 2
1441075_at	0.0376	0.000827	3.72707	-0.614091	0.237492	Nostrin	nitric oxide synthase trafficker
1423284_at	0.0376	0.000827	-3.72695	-0.614387	-0.211299	Mansc1	MANSC domain containing 1
1452134_at	0.0378	0.000832	-3.72496	-0.619302	-0.170927	Tmem175	transmembrane protein 175
1417850_at	0.0379	0.000834	-3.72364	-0.622553	-0.186179	Rb1	retinoblastoma 1
1418582_at	0.0379	0.000835	3.72323	-0.623555	0.168285	Cbfa2t3	core-binding factor, runt domain, alpha subunit 2, translocated to, 3 (human)
1455118_at	0.0379	0.000836	-3.72282	-0.624568	-0.150199	Tcaim	T cell activation inhibitor, mitochondrial
1457918_at	0.0379	0.000839	-3.72159	-0.627584	-0.223675	Tnfaip2	tumor necrosis factor, alpha-induced protein 2
1434724_at	0.0379	0.000839	3.72149	-0.627836	0.165234	Usp31	ubiquitin specific peptidase 31
1421498_a_at	0.0379	0.00084	3.72116	-0.628658	0.166367	2010204K13Rik	RIKEN cDNA 2010204K13 gene
1434618_at	0.038	0.000842	3.72016	-0.631117	0.285299	Crebzf	CREB/ATF bZIP transcription factor
1435806_at	0.038	0.000845	3.71909	-0.633756	0.177264	Utp23	UTP23 small subunit processome component
1428142_at	0.038	0.000845	3.71875	-0.634581	0.468169	Etv5	ets variant 5
1416021_a_at	0.038	0.000846	-3.71839	-0.635474	-0.135854	Fabp5	fatty acid binding protein 5, epidermal
1439932_at	0.038	0.000847	3.71808	-0.636241	0.157598	Ubxn2b	UBX domain protein 2B
1419488_at	0.038	0.000848	-3.71771	-0.637148	-0.171448	Tnip2	TNFAIP3 interacting protein 2
1427045_at	0.038	0.000849	3.71716	-0.638511	0.162967	Synpo	synaptopodin
1454858_x_at	0.038	0.00085	3.71666	-0.639738	0.238048	Mettl7a1	methyltransferase like 7A1
1434308_at	0.038	0.000851	-3.71648	-0.640166	-0.18977	Slc43a2	solute carrier family 43, member 2
1450513_at	0.038	0.000852	-3.71588	-0.641661	-0.149915	Cd33	CD33 antigen
1425739_at	0.038	0.000852	3.71584	-0.641752	0.174458	Pld1	phospholipase D1
1436303_at	0.038	0.000853	3.71526	-0.643174	0.189803	Mllt4	myeloid/lymphoid or mixed-lineage leukemia; translocated to, 4
1448979_at	0.038	0.000854	-3.71515	-0.643438	-0.212075	Bloc1s5	biogenesis of lysosomal organelles complex-1, subunit 5, muted
1428118_at	0.038	0.000854	3.71513	-0.643487	0.133697	Lingo1	leucine rich repeat and Ig domain containing 1
1428259_at	0.038	0.000855	3.71478	-0.644369	0.139591	Pxdn	peroxidasin
1436157_at	0.038	0.000856	3.71427	-0.645622	0.203243	Ccar1	cell division cycle and apoptosis regulator 1
1418392_a_at	0.0381	0.000858	-3.71331	-0.647968	-0.194211	Gbp3	guanylate binding protein 3
1430133_at	0.0382	0.000863	3.71101	-0.653625	0.165165	Tbc1d8b	TBC1 domain family, member 8B
1438277_at	0.0382	0.000863	3.71088	-0.653944	0.168896	E130308A19Rik	RIKEN cDNA E130308A19 gene
1456069_at	0.0382	0.000864	3.71086	-0.654013	0.249366	Dtna	dystrobrevin alpha
1435348_at	0.0382	0.000864	3.7106	-0.654644	0.158716	Kdm5c	lysine (K)-specific demethylase 5C
1424276_at	0.0382	0.000865	3.71005	-0.655995	0.123591	Snx16	sorting nexin 16
1424533_a_at	0.0382	0.000867	3.70949	-0.657378	0.147719	Ccdc137	coiled-coil domain containing 137
1427921_s_at	0.0382	0.000868	3.70914	-0.658236	0.18862	Cmc2	COX assembly mitochondrial protein 2
1452594_at	0.0383	0.000871	3.70748	-0.662331	0.263109	Dusp11	dual specificity phosphatase 11 (RNA/RNP complex 1-interacting)
1458644_at	0.0384	0.000874	-3.70654	-0.664637	-0.183787	Ccdc62	coiled-coil domain containing 62
1454843_at	0.0385	0.000877	-3.70491	-0.668646	-0.119464	Prps2	phosphoribosyl pyrophosphate synthetase 2
1425188_s_at	0.0385	0.000878	3.70465	-0.669276	0.164142	Sel1l	sel-1 suppressor of lin-12-like (C. elegans)
1429415_at	0.0385	0.000879	3.70402	-0.67084	0.179518	Zmynd8	zinc finger, MYND-type containing 8
1434005_at	0.0385	0.00088	-3.70392	-0.671068	-0.152336	Rbms1	RNA binding motif, single stranded interacting protein 1
1435098_at	0.0387	0.000886	-3.70137	-0.677353	-0.164455	Mfsd4b4	major facilitator superfamily domain containing 4B4
1450732_a_at	0.0387	0.000886	3.7013	-0.677502	0.166406	Bicd2	bicaudal D homolog 2 (Drosophila)
1437364_at	0.0387	0.000887	-3.70099	-0.67827	-0.167656	Coq3	coenzyme Q3 methyltransferase
1457894_at	0.0388	0.00089	3.69978	-0.68125	0.150923	Mettl11b	methyltransferase like 11B
1426698_a_at	0.0388	0.000891	3.69911	-0.682901	0.14719	Hnrnpm	heterogeneous nuclear ribonucleoprotein M
1460330_at	0.039	0.000897	3.69664	-0.688962	0.174739	Anxa3	annexin A3
1423845_at	0.039	0.000897	3.69659	-0.689093	0.151633	Csdc2	cold shock domain containing C2, RNA binding
1420174_s_at	0.039	0.000899	3.69576	-0.691118	0.151724	Tax1bp1	Tax1 (human T cell leukemia virus type I) binding protein 1
1417060_at	0.039	0.000899	3.69576	-0.691122	0.145102	Ppp1r11	protein phosphatase 1, regulatory (inhibitor) subunit 11
1428781_at	0.039	0.0009	3.69558	-0.691575	0.194788	Dmkn	dermokine
1455577_at	0.039	0.000901	-3.69493	-0.693167	-0.243401	Ccl28	chemokine (C-C motif) ligand 28
1427539_a_at	0.039	0.000902	3.69471	-0.693704	0.203268	Zwint	ZW10 interactor
1417516_at	0.039	0.000902	3.69451	-0.694189	0.126277	Ddit3	DNA-damage inducible transcript 3
1435977_at	0.0392	0.00091	-3.69128	-0.702146	-0.171153	Hdgfrp3	hepatoma-derived growth factor, related protein 3
1416115_at	0.0392	0.00091	-3.6912	-0.702332	-0.140101	Orc3	origin recognition complex, subunit 3
1421458_at	0.0393	0.000912	-3.69045	-0.704174	-0.170495	Zfp112	zinc finger protein 112
1449888_at	0.0393	0.000914	3.68978	-0.705807	0.178224	Epas1	endothelial PAS domain protein 1
1451601_a_at	0.0394	0.000916	3.68869	-0.708494	0.219321	Spns2	spinster homolog 2
1447521_x_at	0.0395	0.000921	3.68664	-0.713515	0.151867	Arhgap39	Rho GTPase activating protein 39
1430316_at	0.0395	0.000923	-3.68608	-0.714897	-0.185118	Ispd	isoprenoid synthase domain containing
1416954_at	0.0395	0.000923	-3.6859	-0.715351	-0.202325	Slc25a10	solute carrier family 25 (mitochondrial carrier, dicarboxylate transporter), member 10
1456946_at	0.0395	0.000923	3.68585	-0.71547	0.205539	Sh3rf3	SH3 domain containing ring finger 3
1424277_at	0.0396	0.000927	-3.68417	-0.719588	-0.165018	Haus7	HAUS augmin-like complex, subunit 7
1451475_at	0.0396	0.000928	-3.68387	-0.720335	-0.248248	Plxnd1	plexin D1
1429248_at	0.0396	0.000928	-3.68375	-0.720618	-0.138892	Apopt1	apoptogenic, mitochondrial 1
1437892_at	0.0399	0.000937	3.68034	-0.728977	0.203851	Zkscan3	zinc finger with KRAB and SCAN domains 3
1455163_at	0.0399	0.000937	-3.6802	-0.729336	-0.257471	Guf1	GUF1 homolog, GTPase
1427329_a_at	0.0399	0.000939	-3.67959	-0.730833	-0.267225	Ighm	immunoglobulin heavy constant mu
1422516_a_at	0.0399	0.00094	-3.67901	-0.732258	-0.132067	Fibp	fibroblast growth factor (acidic) intracellular binding protein
1453334_at	0.04	0.000942	3.67838	-0.733795	0.136926	B230216N24Rik	RIKEN cDNA B230216N24 gene
1450863_a_at	0.04	0.000944	3.67748	-0.736002	0.166427	Dclk1	doublecortin-like kinase 1
1419690_at	0.0401	0.000946	-3.67672	-0.737856	-0.217234	Chmp1b///2610002M06Rik	charged multivesicular body protein 1B///RIKEN cDNA 2610002M06 gene
1418406_at	0.0401	0.000948	-3.67593	-0.739809	-0.170756	Pde8a	phosphodiesterase 8A
1423103_at	0.0402	0.000951	-3.67459	-0.743083	-0.150219	Rfx5	regulatory factor X, 5 (influences HLA class II expression)
1441317_x_at	0.0402	0.000953	-3.67414	-0.744187	-0.175021	Jakmip1	janus kinase and microtubule interacting protein 1
1426526_s_at	0.0402	0.000953	-3.67393	-0.744723	-0.209113	Ovgp1	oviductal glycoprotein 1
1453595_at	0.0403	0.000956	3.67264	-0.747882	0.195641	2900064B18Rik	RIKEN cDNA 2900064B18 gene
1440586_at	0.0403	0.000957	3.67244	-0.748358	0.199165	B430203I24Rik	RIKEN cDNA B430203I24 gene
1437072_at	0.0405	0.000962	3.67054	-0.753023	0.198897	Arhgap25	Rho GTPase activating protein 25
1435369_at	0.0405	0.000963	3.67022	-0.753797	0.182303	Fastkd5	FAST kinase domains 5
1428325_at	0.0406	0.000967	3.66847	-0.75809	0.165818	Cnpy4	canopy FGF signaling regulator 4
1455017_a_at	0.0407	0.00097	-3.66746	-0.76058	-0.205315	Zmym3	zinc finger, MYM-type 3
1448990_a_at	0.0408	0.000972	-3.66645	-0.763037	-0.238296	Myo1b	myosin IB
1418253_a_at	0.0409	0.000977	3.66479	-0.76711	0.176651	Hspa4l	heat shock protein 4 like
1457198_at	0.041	0.000981	3.66314	-0.771157	0.183662	Nrp1	neuropilin 1
1432538_a_at	0.0414	0.000992	-3.65913	-0.78097	-0.215533	Rfc3	replication factor C (activator 1) 3
1460254_at	0.0416	0.000997	-3.65702	-0.786156	-0.194419	Oxld1	oxidoreductase like domain containing 1
1456150_at	0.0416	0.000997	3.65698	-0.786235	0.174252	Kdm7a	lysine (K)-specific demethylase 7A
1426908_at	0.0416	0.000998	3.6569	-0.786452	0.135539	Galnt7	UDP-N-acetyl-alpha-D-galactosamine: polypeptide N-acetylgalactosaminyltransferase 7
1427780_at	0.0418	0.001	3.65466	-0.79193	0.172765	Defb35	defensin beta 35
1456125_a_at	0.0419	0.00101	3.65329	-0.795274	0.177537	Dynll1	dynein light chain LC8-type 1
1429749_at	0.0419	0.00101	-3.6532	-0.795506	-0.157657	Sfmbt1	Scm-like with four mbt domains 1
1450172_at	0.0419	0.00101	3.65248	-0.797255	0.287004	Pknox1	Pbx/knotted 1 homeobox
1436970_a_at	0.042	0.00101	-3.6517	-0.79917	-0.166876	Pdgfrb	platelet derived growth factor receptor, beta polypeptide
1453059_at	0.0421	0.00102	-3.64972	-0.804012	-0.130939	Mlip	muscular LMNA-interacting protein
1449009_at	0.0422	0.00102	-3.64907	-0.805596	-0.209488	Tgtp2///Tgtp1	T cell specific GTPase 2///T cell specific GTPase 1
1419043_a_at	0.0424	0.00103	-3.64646	-0.812	-0.257804	Iigp1	interferon inducible GTPase 1
1440485_at	0.0424	0.00103	-3.6462	-0.812624	-0.219609	Gm36839	predicted gene, 36839
1416207_at	0.0424	0.00103	-3.64569	-0.813858	-0.134095	Taz	tafazzin
1421614_at	0.0424	0.00103	3.64496	-0.815662	0.157939	Zan	zonadhesin
1418764_a_at	0.0424	0.00103	3.64483	-0.815968	0.160289	Bpnt1	bisphosphate 3'-nucleotidase 1
1454886_x_at	0.0424	0.00103	3.64474	-0.816192	0.173277	Trim9	tripartite motif-containing 9
1450685_at	0.0424	0.00103	3.64397	-0.818077	0.116139	Arpp19	cAMP-regulated phosphoprotein 19
1418468_at	0.0424	0.00103	3.64384	-0.818398	0.191536	Gm2274///Gm2260///Anxa11	predicted gene 2274///predicted gene 2260///annexin A11
1449623_at	0.0424	0.00103	-3.64382	-0.818437	-0.289214	Txnrd3	thioredoxin reductase 3
1443215_at	0.0424	0.00103	-3.64367	-0.818812	-0.23147	Rims2	regulating synaptic membrane exocytosis 2
1448529_at	0.0425	0.00104	3.64231	-0.822127	0.269963	Thbd	thrombomodulin
1423306_at	0.0425	0.00104	3.64222	-0.822344	0.303026	Smim3	small integral membrane protein 3
1438648_x_at	0.0426	0.00104	-3.64111	-0.825074	-0.272536	Gkn3	gastrokine 3
1448883_at	0.0426	0.00104	-3.64075	-0.825951	-0.117189	Lgmn	legumain
1453737_at	0.0426	0.00104	3.64021	-0.827281	0.16815	Wipf2	WAS/WASL interacting protein family, member 2
1424633_at	0.0428	0.00105	3.63827	-0.832004	0.201573	Camk1g	calcium/calmodulin-dependent protein kinase I gamma
1451211_a_at	0.0428	0.00105	-3.63767	-0.833486	-0.16169	Eif2d	eukaryotic translation initiation factor 2D
1422579_at	0.0428	0.00105	3.63714	-0.834772	0.157355	Hspe1	heat shock protein 1 (chaperonin 10)
1417875_at	0.043	0.00106	3.63571	-0.838257	0.100635	Ddx50	DEAD (Asp-Glu-Ala-Asp) box polypeptide 50
1428929_s_at	0.043	0.00106	-3.63539	-0.83904	-0.122337	Slc25a26	solute carrier family 25 (mitochondrial carrier, phosphate carrier), member 26
1452963_at	0.0431	0.00106	3.63345	-0.843803	0.196609	9530077C05Rik	RIKEN cDNA 9530077C05 gene
1423100_at	0.0431	0.00106	3.63307	-0.844706	0.62299	Fos	FBJ osteosarcoma oncogene
1429129_at	0.0431	0.00106	-3.63299	-0.844919	-0.274247	Lrrcc1	leucine rich repeat and coiled-coil domain containing 1
1434964_at	0.0431	0.00106	3.63287	-0.845205	0.128917	Amz2	archaelysin family metallopeptidase 2
1421065_at	0.0432	0.00107	3.63056	-0.850863	0.155413	Jak2	Janus kinase 2
1425354_a_at	0.0434	0.00107	3.62921	-0.854146	0.113913	Aggf1	angiogenic factor with G patch and FHA domains 1
1435744_at	0.0434	0.00108	-3.62856	-0.855729	-0.190615	Firre	functional intergenic repeating RNA element
1426727_s_at	0.0434	0.00108	3.62838	-0.856184	0.195227	Gm8801///Ppp1r10	protein phosphatase 1, regulatory subunit 10 pseudogene///protein phosphatase 1, regulatory subunit 10
1458344_at	0.0434	0.00108	3.62763	-0.858015	0.14731	Nagpa	N-acetylglucosamine-1-phosphodiester alpha-N-acetylglucosaminidase
1444363_at	0.0435	0.00108	-3.62659	-0.860547	-0.146134	Mkln1os	muskelin 1, intracellular mediator containing kelch motifs, opposite strand
1425231_a_at	0.0435	0.00108	-3.6259	-0.862227	-0.169687	Zfp46	zinc finger protein 46
1449493_at	0.0435	0.00108	3.62576	-0.862568	0.235109	Insl5	insulin-like 5
1419254_at	0.0436	0.00109	3.62496	-0.864533	0.184128	Mthfd2	methylenetetrahydrofolate dehydrogenase (NAD+ dependent), methenyltetrahydrofolate cyclohydrolase
1426351_at	0.0437	0.00109	3.62333	-0.868499	0.139675	Hspd1	heat shock protein 1 (chaperonin)
1425776_a_at	0.0437	0.00109	-3.62311	-0.869037	-0.137364	C87436	expressed sequence C87436
1431836_x_at	0.0439	0.0011	-3.6213	-0.873443	-0.185192	Mamstr	MEF2 activating motif and SAP domain containing transcriptional regulator
1435941_at	0.0439	0.0011	3.62034	-0.875799	0.163795	Rhbdl3	rhomboid, veinlet-like 3 (Drosophila)
1449968_s_at	0.0441	0.00111	-3.61813	-0.881189	-0.118113	Acot10///Acot9	acyl-CoA thioesterase 10///acyl-CoA thioesterase 9
1419370_a_at	0.0441	0.00111	3.61755	-0.88261	0.164947	Mfap1b///Mfap1a	microfibrillar-associated protein 1B///microfibrillar-associated protein 1A
1443773_at	0.0442	0.00111	-3.61607	-0.886203	-0.152526	Ylpm1	YLP motif containing 1
1460563_at	0.0443	0.00112	3.61506	-0.888675	0.13657	Nus1	NUS1 dehydrodolichyl diphosphate synthase subunit
1449188_at	0.0444	0.00112	3.61432	-0.890493	0.19584	Midn	midnolin
1423405_at	0.0444	0.00112	3.61336	-0.892822	0.141268	Timp4	tissue inhibitor of metalloproteinase 4
1455589_at	0.0444	0.00112	-3.6132	-0.893225	-0.133764	1700100M05Rik	RIKEN cDNA 1700100M05 gene
1419144_at	0.0444	0.00112	3.6128	-0.894202	0.286341	Cd163	CD163 antigen
1458954_at	0.0445	0.00112	3.61176	-0.896715	0.194545	Gm13308	predicted gene 13308
1416205_at	0.0445	0.00113	-3.61126	-0.897955	-0.154425	Glb1	galactosidase, beta 1
1416167_at	0.0447	0.00113	-3.60972	-0.901704	-0.153712	Prdx4	peroxiredoxin 4
1441946_at	0.0448	0.00114	-3.60797	-0.905956	-0.183013	Itih5	inter-alpha (globulin) inhibitor H5
1451214_at	0.0448	0.00114	3.60771	-0.9066	0.168675	Kbtbd2	kelch repeat and BTB (POZ) domain containing 2
1424471_at	0.0448	0.00114	3.60737	-0.907432	0.169871	Rapgef3	Rap guanine nucleotide exchange factor (GEF) 3
1433430_s_at	0.0448	0.00114	3.60716	-0.907948	0.136012	Cdc23	CDC23 cell division cycle 23
1453109_at	0.0448	0.00114	3.60652	-0.909487	0.139917	Arsk	arylsulfatase K
1458209_at	0.0449	0.00114	3.60573	-0.911427	0.142041	Kndc1	kinase non-catalytic C-lobe domain (KIND) containing 1
1443609_s_at	0.0449	0.00115	3.60488	-0.913494	0.222529	Syvn1	synovial apoptosis inhibitor 1, synoviolin
1417172_at	0.045	0.00115	3.6033	-0.917348	0.152156	Ube2l6	ubiquitin-conjugating enzyme E2L 6
1424367_a_at	0.045	0.00115	3.60329	-0.917376	0.141328	Homer2	homer scaffolding protein 2
1423544_at	0.045	0.00115	3.60291	-0.918294	0.162717	Ptpn5	protein tyrosine phosphatase, non-receptor type 5
1451534_at	0.045	0.00115	3.60282	-0.918502	0.159619	Scgn	secretagogin, EF-hand calcium binding protein
1457881_at	0.0451	0.00116	3.60181	-0.920975	0.126253	Osbpl6	oxysterol binding protein-like 6
1416898_a_at	0.0452	0.00116	3.60104	-0.922854	0.214099	Irf3	interferon regulatory factor 3
1439105_at	0.0453	0.00116	3.59956	-0.92644	0.220507	Cdadc1	cytidine and dCMP deaminase domain containing 1
1450628_at	0.0453	0.00116	-3.59912	-0.927525	-0.139592	Slc2a8	solute carrier family 2, (facilitated glucose transporter), member 8
1416155_at	0.0453	0.00116	-3.5991	-0.927565	-0.189849	Hmgb3	high mobility group box 3
1425413_at	0.0453	0.00116	3.59869	-0.928576	0.166589	Rfx3	regulatory factor X, 3 (influences HLA class II expression)
1459987_s_at	0.0454	0.00117	3.59756	-0.931328	0.115961	Cct3	chaperonin containing Tcp1, subunit 3 (gamma)
1423088_at	0.0454	0.00117	3.59727	-0.93202	0.15845	Tmod3	tropomodulin 3
1431212_a_at	0.0454	0.00117	-3.597	-0.932687	-0.194139	Trmt6	tRNA methyltransferase 6
1421646_a_at	0.0454	0.00117	-3.59639	-0.934175	-0.168534	Pias3	protein inhibitor of activated STAT 3
1448566_at	0.0454	0.00117	-3.59593	-0.935283	-0.20379	Slc40a1	solute carrier family 40 (iron-regulated transporter), member 1
1417057_a_at	0.0457	0.00118	3.59347	-0.941278	0.148572	Lamp3///Ppid	lysosomal-associated membrane protein 3///peptidylprolyl isomerase D (cyclophilin D)
1450939_at	0.0457	0.00118	3.59293	-0.942602	0.160157	Entpd1	ectonucleoside triphosphate diphosphohydrolase 1
1433883_at	0.0457	0.00118	3.59225	-0.944257	0.164572	Tpm4	tropomyosin 4
1448927_at	0.0457	0.00119	3.59197	-0.944924	0.201079	Kcnn2	potassium intermediate/small conductance calcium-activated channel, subfamily N, member 2
1429041_at	0.0461	0.0012	-3.58805	-0.954464	-0.156472	2610005L07Rik	cadherin 11 pseudogene
1442676_at	0.0461	0.0012	-3.58781	-0.955034	-0.249863	Maoa	monoamine oxidase A
1418141_at	0.0461	0.0012	-3.58745	-0.955914	-0.181174	Dcx	doublecortin
1440417_at	0.0464	0.00121	-3.58472	-0.962552	-0.166542	D19Ertd409e	DNA segment, Chr 19, ERATO Doi 409, expressed
1438511_a_at	0.0465	0.00121	3.58371	-0.96501	0.241905	Rgcc	regulator of cell cycle
1455698_at	0.0466	0.00121	3.58306	-0.966599	0.128812	Sec62	SEC62 homolog (S. cerevisiae)
1452012_a_at	0.0466	0.00122	-3.58266	-0.967572	-0.147764	Exosc1	exosome component 1
1438684_at	0.0466	0.00122	3.58177	-0.969738	0.192088	Nuak1	NUAK family, SNF1-like kinase, 1
1429202_at	0.0467	0.00122	-3.58132	-0.97082	-0.177181	2610019N06Rik	RIKEN cDNA 2610019N06 gene
1430650_at	0.0467	0.00122	3.58053	-0.972744	0.222842	Zfp24	zinc finger protein 24
1448673_at	0.0468	0.00122	-3.57967	-0.974847	-0.229435	Nectin3	nectin cell adhesion molecule 3
1416354_at	0.0468	0.00123	-3.57937	-0.975578	-0.191308	Rbmx	RNA binding motif protein, X chromosome
1418295_s_at	0.0469	0.00123	-3.5783	-0.978158	-0.117629	Dgat1	diacylglycerol O-acyltransferase 1
1448654_at	0.0469	0.00123	-3.57758	-0.979914	-0.308268	Mtch2	mitochondrial carrier 2
1442321_at	0.047	0.00124	3.57648	-0.98258	0.201834	Commd2	COMM domain containing 2
1436550_at	0.0471	0.00124	3.57526	-0.985562	0.240997	Fbxo30	F-box protein 30
1442660_at	0.0471	0.00124	3.57512	-0.985893	0.164958	Ppil2	peptidylprolyl isomerase (cyclophilin)-like 2
1435456_at	0.0471	0.00124	-3.57483	-0.986602	-0.137576	Ttc28	tetratricopeptide repeat domain 28
1424316_at	0.0471	0.00124	3.57452	-0.987341	0.129147	Slc25a19	solute carrier family 25 (mitochondrial thiamine pyrophosphate carrier), member 19
1435302_at	0.0471	0.00124	-3.57389	-0.988884	-0.129576	Taf4b	TATA-box binding protein associated factor 4b
1434957_at	0.0472	0.00125	-3.57307	-0.99087	-0.183712	Cdon	cell adhesion molecule-related/down-regulated by oncogenes
1423320_at	0.0473	0.00125	3.57231	-0.992728	0.194579	Dnase1l2	deoxyribonuclease 1-like 2
1436279_at	0.0473	0.00125	-3.57165	-0.994324	-0.198286	Slc26a7	solute carrier family 26, member 7
1423269_a_at	0.0474	0.00126	3.57033	-0.99752	0.168839	Nedd4l	neural precursor cell expressed, developmentally down-regulated gene 4-like
1436468_at	0.0477	0.00126	-3.56824	-1.00261	-0.283064	Zdhhc8	zinc finger, DHHC domain containing 8
1450449_a_at	0.0477	0.00126	3.56777	-1.00375	0.219265	Rilpl1	Rab interacting lysosomal protein-like 1
1435271_at	0.048	0.00127	3.56465	-1.01132	0.218959	Irf3	interferon regulatory factor 3
1416755_at	0.048	0.00128	3.56448	-1.01172	0.279096	Dnajb1	DnaJ heat shock protein family (Hsp40) member B1
1417938_at	0.048	0.00128	-3.56418	-1.01246	-0.162281	Rad51ap1	RAD51 associated protein 1
1445260_at	0.048	0.00128	3.56362	-1.01381	0.185412	Dcun1d1	DCN1, defective in cullin neddylation 1, domain containing 1 (S. cerevisiae)
1449518_at	0.0481	0.00128	-3.56245	-1.01666	-0.149698	Qpctl	glutaminyl-peptide cyclotransferase-like
1442143_at	0.0482	0.00129	-3.56161	-1.01869	-0.121916	Ano4	anoctamin 4
1418571_at	0.0482	0.00129	3.56107	-1.01999	0.157615	Tnfrsf12a	tumor necrosis factor receptor superfamily, member 12a
1426797_at	0.0487	0.0013	-3.55637	-1.0314	-0.155649	Tmem209	transmembrane protein 209
1425710_a_at	0.0487	0.0013	3.55621	-1.03179	0.209141	Homer1	homer scaffolding protein 1
1458318_at	0.0487	0.0013	3.55613	-1.03197	0.380365	3110047M12Rik	RIKEN cDNA 3110047M12 gene
1452263_at	0.0487	0.0013	-3.55604	-1.0322	-0.169933	Slc35f4	solute carrier family 35, member F4
1423868_at	0.0487	0.0013	-3.55583	-1.03272	-0.150804	Txnrd3	thioredoxin reductase 3
1455184_at	0.0487	0.00131	-3.55512	-1.03443	-0.144083	Mob1b	MOB kinase activator 1B
1448682_at	0.0488	0.00131	3.55441	-1.03616	0.155798	Dynll1	dynein light chain LC8-type 1
1455491_at	0.0488	0.00131	3.55401	-1.03713	0.131167	Hnrnph3	heterogeneous nuclear ribonucleoprotein H3
1460179_at	0.0488	0.00131	3.55353	-1.03829	0.107573	Dnaja1	DnaJ heat shock protein family (Hsp40) member A1
1456990_at	0.049	0.00132	-3.55168	-1.04276	-0.147048	Gm19569	predicted gene, 19569
1449519_at	0.049	0.00132	3.5514	-1.04344	0.204726	Gadd45a	growth arrest and DNA-damage-inducible 45 alpha
1415806_at	0.0491	0.00132	3.55057	-1.04545	0.198106	Plat	plasminogen activator, tissue
1428319_at	0.0491	0.00132	3.55007	-1.04666	0.257052	Pdlim7	PDZ and LIM domain 7
1434382_at	0.0494	0.00133	3.54779	-1.05218	0.21145	Serinc2	serine incorporator 2
1425141_at	0.0494	0.00134	-3.54676	-1.05468	-0.1847	Lactb2	lactamase, beta 2
1454750_a_at	0.0494	0.00134	-3.54658	-1.05513	-0.150482	Dcaf15	DDB1 and CUL4 associated factor 15
1444273_at	0.0495	0.00134	3.54571	-1.05723	0.164884	AW555355	expressed sequence AW555355
1434118_at	0.0495	0.00134	3.54527	-1.0583	0.198315	Mul1	mitochondrial ubiquitin ligase activator of NFKB 1
1424142_at	0.0495	0.00134	-3.54518	-1.05852	-0.184813	Ikbkap	inhibitor of kappa light polypeptide enhancer in B cells, kinase complex-associated protein
1429141_at	0.0497	0.00135	-3.54319	-1.06334	-0.167418	Neurl2	neuralized E3 ubiquitin protein ligase 2
1422557_s_at	0.0497	0.00135	3.54312	-1.0635	0.194652	Mt1	metallothionein 1
1460003_at	0.0497	0.00135	-3.54269	-1.06454	-0.152591	AI956758	expressed sequence AI956758
1457030_at	0.0498	0.00135	3.54162	-1.06713	0.154454	Mirg	miRNA containing gene
1436376_s_at	0.0499	0.00136	3.54035	-1.07021	0.145762	Srbd1	S1 RNA binding domain 1
1455385_at	0.05	0.00136	-3.53953	-1.07219	-0.244992	Exoc6///Sh3glb1	exocyst complex component 6///SH3-domain GRB2-like B1 (endophilin)
1455192_at	0.05	0.00136	3.5392	-1.07299	0.164807	Tmem198	transmembrane protein 198
1418042_a_at	0.0501	0.00137	3.5377	-1.07661	0.121397	Abcc5	ATP-binding cassette, sub-family C (CFTR/MRP), member 5
1458399_at	0.0501	0.00137	-3.5372	-1.07783	-0.167634	Lrrc3	leucine rich repeat containing 3
1437746_at	0.0501	0.00137	-3.53707	-1.07814	-0.18571	Lrrtm1	leucine rich repeat transmembrane neuronal 1
1420720_at	0.0501	0.00137	3.53651	-1.0795	0.422381	Nptx2	neuronal pentraxin 2
1457702_at	0.0501	0.00137	-3.53629	-1.08002	-0.196256	Gpr12	G-protein coupled receptor 12
1425937_a_at	0.0501	0.00138	3.53591	-1.08094	0.18753	Hexim1	hexamethylene bis-acetamide inducible 1
1439495_at	0.0501	0.00138	-3.53589	-1.081	-0.193746	Uvssa	UV stimulated scaffold protein A
1432283_at	0.0501	0.00138	3.53554	-1.08185	0.137654	Fam228a	family with sequence similarity 228, member A
1416067_at	0.0501	0.00138	3.53521	-1.08263	0.170648	Ifrd1	interferon-related developmental regulator 1
1423666_s_at	0.0501	0.00138	-3.53505	-1.08303	-0.133622	Rpl5///Rpl5-ps2	ribosomal protein L5///ribisomal protein L5, pseudogene 2
1448607_at	0.0502	0.00138	-3.53455	-1.08424	-0.172704	Nampt	nicotinamide phosphoribosyltransferase
1424343_a_at	0.0502	0.00138	3.53383	-1.086	0.110021	Eif1a	eukaryotic translation initiation factor 1A
1426342_at	0.0502	0.00138	3.53382	-1.08602	0.144045	Stt3b	STT3, subunit of the oligosaccharyltransferase complex, homolog B (S. cerevisiae)
1426549_at	0.0502	0.00138	-3.53363	-1.08647	-0.141608	Mri1	methylthioribose-1-phosphate isomerase 1
1416022_at	0.0503	0.00139	-3.53228	-1.08973	-0.146432	Fabp5	fatty acid binding protein 5, epidermal
1457531_a_at	0.0503	0.00139	-3.53218	-1.08998	-0.206327	A930017K11Rik	RIKEN cDNA A930017K11 gene
1418986_a_at	0.0503	0.00139	-3.532	-1.09042	-0.143289	Uxt	ubiquitously expressed transcript
1418300_a_at	0.0503	0.00139	3.53147	-1.09169	0.139279	Mknk2	MAP kinase-interacting serine/threonine kinase 2
1451260_at	0.0503	0.00139	-3.53145	-1.09174	-0.174861	Aldh1b1	aldehyde dehydrogenase 1 family, member B1
1451605_at	0.0503	0.00139	-3.53083	-1.09325	-0.190605	Dyx1c1	dyslexia susceptibility 1 candidate 1
1449126_at	0.0503	0.0014	-3.53034	-1.09443	-0.17029	Zfp90	zinc finger protein 90
1457261_at	0.0503	0.0014	-3.53019	-1.09479	-0.201918	A930025H08Rik	RIKEN cDNA A930025H08 gene
1418386_at	0.0503	0.0014	3.52977	-1.09581	0.149789	Eef1akmt1	eukaryotic translation elongation factor 1 alpha lysine methyltransferase 1
1426801_at	0.0503	0.0014	3.52928	-1.09699	0.208581	Sept8	septin 8
1417810_a_at	0.0503	0.0014	3.52926	-1.09703	0.112816	Pacsin2///Kcnb1	protein kinase C and casein kinase substrate in neurons 2///potassium voltage gated channel, Shab-related subfamily, member 1
1435904_at	0.0504	0.0014	3.52816	-1.09969	0.191139	Ago3	argonaute RISC catalytic subunit 3
1458456_x_at	0.0505	0.00141	-3.52745	-1.1014	-0.189001	6430571L13Rik	RIKEN cDNA 6430571L13 gene
1436049_at	0.0505	0.00141	3.52718	-1.10206	0.152395	Tox4	TOX high mobility group box family member 4
1429267_at	0.0505	0.00141	3.52663	-1.10338	0.134978	Acot11	acyl-CoA thioesterase 11
1423738_at	0.0506	0.00141	3.52559	-1.10591	0.243569	Oxa1l	oxidase assembly 1-like
1460455_at	0.0506	0.00141	-3.52544	-1.10626	-0.186303	Ubr3	ubiquitin protein ligase E3 component n-recognin 3
1417039_a_at	0.0508	0.00142	-3.52377	-1.11031	-0.125249	Cul7	cullin 7
1427244_at	0.0509	0.00143	-3.52207	-1.11441	-0.135644	Trappc12	trafficking protein particle complex 12
1448129_at	0.0512	0.00143	3.51995	-1.11952	0.102197	Arpc5	actin related protein 2/3 complex, subunit 5
1425557_x_at	0.0512	0.00144	3.51959	-1.12041	0.184556	Tsc22d3	TSC22 domain family, member 3
1428271_at	0.0512	0.00144	-3.51912	-1.12155	-0.138187	Acbd4	acyl-Coenzyme A binding domain containing 4
1424418_at	0.0512	0.00144	3.51899	-1.12184	0.139264	Slc25a38	solute carrier family 25, member 38
1426189_at	0.0513	0.00144	-3.51763	-1.12515	-0.196399	Dusp15	dual specificity phosphatase-like 15
1425292_at	0.0514	0.00145	-3.51671	-1.12735	-0.182665	Dtna	dystrobrevin alpha
1427040_at	0.0514	0.00145	-3.51666	-1.12747	-0.154685	Mdfic	MyoD family inhibitor domain containing
1434566_a_at	0.0515	0.00145	3.51543	-1.13044	0.12756	Pramef8	PRAME family member 8
1449184_at	0.0516	0.00145	3.51482	-1.13193	0.429484	Pglyrp1	peptidoglycan recognition protein 1
1417303_at	0.0517	0.00146	-3.51328	-1.13564	-0.192574	Mvd	mevalonate (diphospho) decarboxylase
1455437_at	0.0517	0.00146	3.51283	-1.13673	0.133492	Sik3	SIK family kinase 3
1429051_s_at	0.0517	0.00146	3.51268	-1.1371	0.179806	Sox11	SRY (sex determining region Y)-box 11
1444182_at	0.0517	0.00146	3.51222	-1.13821	0.150682	Igsf23	immunoglobulin superfamily, member 23
1442062_at	0.0519	0.00147	-3.5104	-1.14258	-0.207759	Smad2	SMAD family member 2
1455583_at	0.0519	0.00147	3.51002	-1.14352	0.141351	Gne	glucosamine (UDP-N-acetyl)-2-epimerase/N-acetylmannosamine kinase
1455343_at	0.052	0.00148	-3.50913	-1.14566	-0.237121	Plekha7	pleckstrin homology domain containing, family A member 7
1439633_at	0.052	0.00148	3.50837	-1.14749	0.173762	Syt7	synaptotagmin VII
1455263_at	0.052	0.00148	-3.50817	-1.14796	-0.19656	Lacc1	laccase (multicopper oxidoreductase) domain containing 1
1452625_at	0.052	0.00148	-3.50777	-1.14894	-0.109346	Kctd2	potassium channel tetramerisation domain containing 2
1448380_at	0.052	0.00148	-3.50772	-1.14905	-0.156466	Lgals3bp	lectin, galactoside-binding, soluble, 3 binding protein
1423594_a_at	0.052	0.00148	-3.5077	-1.1491	-0.137565	Ednrb	endothelin receptor type B
1455402_at	0.0521	0.00149	3.50663	-1.15168	0.169214	Socs7	suppressor of cytokine signaling 7
1419426_s_at	0.0522	0.00149	-3.50533	-1.15481	-0.283644	Gm21541///Gm1987///Gm13304///Gm10591///Ccl21b///LOC100041593///LOC100041504///Ccl21c///Ccl21a	predicted gene, 21541///predicted gene 1987///predicted gene 13304///predicted gene 10591///chemokine (C-C motif) ligand 21B (leucine)///C-C motif chemokine 21c///C-C motif chemokine 21c///chemokine (C-C motif) ligand 21C (leucine)///chemokine (C-C motif) ligand 21A (serine)
1451840_at	0.0522	0.00149	-3.50517	-1.15522	-0.145266	Kcnip4	Kv channel interacting protein 4
1426369_at	0.0522	0.00149	3.50514	-1.15527	0.139389	Far1	fatty acyl CoA reductase 1
1435890_at	0.0522	0.00149	-3.50503	-1.15553	-0.197112	Atl3	atlastin GTPase 3
1456700_x_at	0.0522	0.00149	-3.50465	-1.15645	-0.148418	Marcks	myristoylated alanine rich protein kinase C substrate
1436182_at	0.0522	0.0015	-3.50389	-1.15829	-0.155776	Satb1	special AT-rich sequence binding protein 1
1453687_at	0.0524	0.0015	3.50246	-1.16175	0.199123	Slc4a3	solute carrier family 4 (anion exchanger), member 3
1456889_at	0.0524	0.0015	-3.50207	-1.16269	-0.192227	Gm4285	predicted gene 4285
1416891_at	0.0524	0.00151	3.50179	-1.16336	0.135218	Numb	numb homolog (Drosophila)
1443790_x_at	0.0525	0.00151	-3.50102	-1.1652	-0.232806	Particl	promoter of Mat2a antisense radiation induced circulating long non-coding RNA
1450173_at	0.0526	0.00151	-3.49971	-1.16837	-0.156873	Ripk2	receptor (TNFRSF)-interacting serine-threonine kinase 2
1433653_at	0.0526	0.00151	3.49947	-1.16895	0.202396	Fam20a	family with sequence similarity 20, member A
1417571_at	0.0526	0.00152	-3.4991	-1.16983	-0.165027	Mpg	N-methylpurine-DNA glycosylase
1431220_at	0.0527	0.00152	-3.49812	-1.17219	-0.211284	LOC102642487	uncharacterized LOC102642487
1436593_at	0.0528	0.00152	-3.49692	-1.17509	-0.123339	1700016K19Rik	RIKEN cDNA 1700016K19 gene
1421066_at	0.0529	0.00153	3.49641	-1.17633	0.125552	Jak2	Janus kinase 2
1426472_at	0.0529	0.00153	3.49609	-1.17709	0.190633	Zfp52	zinc finger protein 52
1451082_at	0.0529	0.00153	-3.49584	-1.17769	-0.157821	Cmtr1	cap methyltransferase 1
1460275_at	0.0531	0.00154	3.49411	-1.18186	0.179296	Gpr3	G-protein coupled receptor 3
1440340_at	0.0534	0.00155	-3.49137	-1.18846	-0.219756	B3galt6	UDP-Gal:betaGal beta 1,3-galactosyltransferase, polypeptide 6
1460258_at	0.0538	0.00156	-3.48833	-1.19578	-0.196943	Lect1	leukocyte cell derived chemotaxin 1
1435748_at	0.0541	0.00157	-3.48568	-1.20217	-0.11942	Gda	guanine deaminase
1459659_at	0.0541	0.00157	-3.4855	-1.20258	-0.212267	Gm31454	predicted gene, 31454
1452083_a_at	0.0541	0.00157	3.48533	-1.203	0.184247	Pja1	praja ring finger 1, E3 ubiquitin protein ligase
1436328_at	0.0541	0.00157	-3.48523	-1.20325	-0.128503	Rnmt	RNA (guanine-7-) methyltransferase
1436799_at	0.0541	0.00158	3.48445	-1.20512	0.220054	Enox1	ecto-NOX disulfide-thiol exchanger 1
1427003_at	0.0541	0.00158	-3.4842	-1.20572	-0.143046	Ppp2r5c	protein phosphatase 2, regulatory subunit B', gamma
1448641_at	0.0543	0.00158	-3.48301	-1.20857	-0.11613	Mbtd1	mbt domain containing 1
1421896_at	0.0543	0.00158	-3.48258	-1.20963	-0.146937	Elk1	ELK1, member of ETS oncogene family
1417552_at	0.0544	0.00159	-3.48144	-1.21236	-0.21467	Fap	fibroblast activation protein
1455459_at	0.0546	0.0016	3.47973	-1.21646	0.205925	Prdm15	PR domain containing 15
1449322_at	0.0546	0.0016	3.47929	-1.21753	0.15028	Gm13363///Ptp4a1	predicted gene 13363///protein tyrosine phosphatase 4a1
1435820_x_at	0.0546	0.0016	-3.47926	-1.2176	-0.132841	Ddr1	discoidin domain receptor family, member 1
1426314_at	0.0549	0.00161	-3.47706	-1.22289	-0.180623	Ednrb	endothelin receptor type B
1418593_at	0.055	0.00161	3.47611	-1.22519	0.112362	Taf6	TATA-box binding protein associated factor 6
1433655_at	0.055	0.00161	-3.47578	-1.22598	-0.128863	Rnf141	ring finger protein 141
1453429_at	0.055	0.00161	-3.47567	-1.22624	-0.218739	Gm31464///9530057J20Rik	predicted gene, 31464///RIKEN cDNA 9530057J20 gene
1435544_at	0.0553	0.00162	3.47333	-1.23186	0.127044	Aars///Exosc6	alanyl-tRNA synthetase///exosome component 6
1430066_at	0.0553	0.00163	3.47221	-1.23456	0.136419	Fam184a	family with sequence similarity 184, member A
1435719_at	0.0554	0.00163	-3.47157	-1.23608	-0.220634	AI448984	expressed sequence AI448984
1427263_at	0.0554	0.00163	3.47071	-1.23816	0.147505	Xist	inactive X specific transcripts
1431119_at	0.0557	0.00164	-3.4684	-1.2437	-0.150054	Dnajb13	DnaJ heat shock protein family (Hsp40) member B13
1434512_x_at	0.0557	0.00164	3.46803	-1.24459	0.111362	Srsf3	serine/arginine-rich splicing factor 3
1446215_at	0.0557	0.00165	-3.46793	-1.24485	-0.186238	Zfhx2os	zinc finger homeobox 2, opposite strand
1448835_at	0.0557	0.00165	3.46778	-1.24519	0.146402	E2f6	E2F transcription factor 6
1416535_at	0.0558	0.00165	-3.46704	-1.24697	-0.116802	Mcrs1	microspherule protein 1
1450701_a_at	0.0558	0.00165	-3.46652	-1.24822	-0.155038	Gtf2h2	general transcription factor II H, polypeptide 2
1418087_at	0.0559	0.00166	-3.4651	-1.25163	-0.1245	Ufd1l	ubiquitin fusion degradation 1 like
1427054_s_at	0.056	0.00166	-3.46403	-1.25421	-0.26033	Abi3bp	ABI gene family, member 3 (NESH) binding protein
1452341_at	0.056	0.00166	-3.46363	-1.25517	-0.159535	Echs1	enoyl Coenzyme A hydratase, short chain, 1, mitochondrial
1440215_at	0.056	0.00167	-3.46338	-1.25576	-0.187532	Triqk	triple QxxK/R motif containing
1430357_at	0.0561	0.00167	-3.46257	-1.25771	-0.172997	H3f3b	H3 histone, family 3B
1435692_at	0.0562	0.00167	3.46195	-1.2592	0.144117	Kctd21	potassium channel tetramerisation domain containing 21
1430714_at	0.0562	0.00168	3.46094	-1.26161	0.161097	Lrrc74b	leucine rich repeat containing 74B
1447507_at	0.0563	0.00168	3.46013	-1.26355	0.17374	C80406	expressed sequence C80406
1436605_at	0.0564	0.00168	-3.45901	-1.26624	-0.167862	Tkt	transketolase
1440455_at	0.0564	0.00169	3.45854	-1.26737	0.168325	Camk2n1	calcium/calmodulin-dependent protein kinase II inhibitor 1
1436979_x_at	0.0566	0.00169	3.45689	-1.27133	0.13619	Rbm14	RNA binding motif protein 14
1420056_s_at	0.0566	0.00169	3.45667	-1.27188	0.166349	Jmjd6	jumonji domain containing 6
1452538_at	0.0567	0.0017	3.45572	-1.27415	0.143907	Ighv14-2///Ighg3///Igh-VJ558///Ighm	immunoglobulin heavy variable 14-2///Immunoglobulin heavy constant gamma 3///immunoglobulin heavy chain (J558 family)///immunoglobulin heavy constant mu
1456857_at	0.0569	0.00171	-3.45358	-1.27928	-0.176338	1500011B03Rik	RIKEN cDNA 1500011B03 gene
1452973_at	0.0569	0.00171	-3.45352	-1.27941	-0.104362	Ppm1k	protein phosphatase 1K (PP2C domain containing)
1428974_s_at	0.057	0.00171	3.45281	-1.28112	0.142	Lztfl1	leucine zipper transcription factor-like 1
1435991_at	0.057	0.00171	-3.45215	-1.28269	-0.143883	Nr3c2	nuclear receptor subfamily 3, group C, member 2
1441118_at	0.057	0.00172	-3.452	-1.28306	-0.132413	Fam222b	family with sequence similarity 222, member B
1435328_at	0.057	0.00172	3.45198	-1.28312	0.233548	Cyhr1	cysteine and histidine rich 1
1455153_at	0.057	0.00172	3.45146	-1.28435	0.205708	Zfp236	zinc finger protein 236
1438458_a_at	0.057	0.00172	3.451	-1.28546	0.268127	Sfpq	splicing factor proline/glutamine rich (polypyrimidine tract binding protein associated)
1452055_at	0.0572	0.00173	-3.44988	-1.28815	-0.148699	Ctdsp1	CTD (carboxy-terminal domain, RNA polymerase II, polypeptide A) small phosphatase 1
1422778_at	0.0574	0.00173	-3.44814	-1.2923	-0.106193	Gm12372///Taf9	predicted gene 12372///TATA-box binding protein associated factor 9
1451457_at	0.0575	0.00174	-3.44719	-1.29459	-0.184029	Sc5d	sterol-C5-desaturase
1428089_at	0.0576	0.00174	-3.44611	-1.29717	-0.11782	Slitrk1	SLIT and NTRK-like family, member 1
1425245_a_at	0.0576	0.00174	-3.44563	-1.29832	-0.163151	Rgs11	regulator of G-protein signaling 11
1444602_at	0.0576	0.00175	-3.44529	-1.29914	-0.141742	Ophn1	oligophrenin 1
1451917_a_at	0.0576	0.00175	3.44439	-1.3013	0.222742	Dclk1	doublecortin-like kinase 1
1426932_at	0.0576	0.00175	3.44426	-1.30162	0.147369	Pum3	pumilio RNA-binding family member 3
1449296_a_at	0.0576	0.00175	-3.4438	-1.30272	-0.149498	Cnp	2',3'-cyclic nucleotide 3' phosphodiesterase
1425079_at	0.0576	0.00175	3.44356	-1.30329	0.259464	Tm6sf2	transmembrane 6 superfamily member 2
1440515_at	0.0576	0.00175	3.44343	-1.30359	0.201638	Dcdc2b	doublecortin domain containing 2b
1458464_at	0.0576	0.00176	-3.44335	-1.30379	-0.208773	Hecw2	HECT, C2 and WW domain containing E3 ubiquitin protein ligase 2
1437347_at	0.0577	0.00176	-3.44286	-1.30497	-0.123393	Ednrb	endothelin receptor type B
1434171_at	0.0577	0.00176	3.44276	-1.30521	0.283519	Zfp874a	zinc finger protein 874a
1416673_at	0.0577	0.00176	-3.44242	-1.30601	-0.165392	Bace2	beta-site APP-cleaving enzyme 2
1449376_at	0.0578	0.00176	-3.44122	-1.3089	-0.120373	Nicn1	nicolin 1
1424795_a_at	0.0578	0.00177	-3.44112	-1.30912	-0.187184	1700001O22Rik	RIKEN cDNA 1700001O22 gene
1457964_at	0.0578	0.00177	-3.44059	-1.31039	-0.122528	1810044D09Rik	RIKEN cDNA 1810044D09 gene
1448403_at	0.0578	0.00177	-3.44043	-1.31078	-0.134933	Lars	leucyl-tRNA synthetase
1439657_at	0.0578	0.00177	-3.44042	-1.31082	-0.154857	A430027H14Rik	RIKEN cDNA A430027H14 gene
1448651_at	0.0578	0.00177	3.43985	-1.31216	0.183915	Nudt5	nudix (nucleoside diphosphate linked moiety X)-type motif 5
1442369_at	0.0578	0.00177	-3.4397	-1.31254	-0.153714	4832406H04Rik	RIKEN cDNA 4832406H04 gene
1439239_at	0.0578	0.00177	-3.43923	-1.31366	-0.261219	Lin7b	lin-7 homolog B (C. elegans)
1419757_at	0.0578	0.00178	3.43902	-1.31415	0.160339	Pitpnm2	phosphatidylinositol transfer protein, membrane-associated 2
1456467_s_at	0.0578	0.00178	3.43874	-1.31484	0.197849	Nlk	nemo like kinase
1422640_at	0.0578	0.00178	-3.43866	-1.31503	-0.155952	Pcdhb9	protocadherin beta 9
1429652_at	0.0579	0.00178	-3.43768	-1.31736	-0.129314	Prrc1	proline-rich coiled-coil 1
1421048_a_at	0.0579	0.00178	-3.43701	-1.31897	-0.162829	Ypel1	yippee-like 1 (Drosophila)
1434508_at	0.0579	0.00179	3.43683	-1.3194	0.183173	Ube2q1	ubiquitin-conjugating enzyme E2Q family member 1
1434829_at	0.0579	0.00179	3.43676	-1.31956	0.112446	Cbl	Casitas B-lineage lymphoma
1460180_at	0.0579	0.00179	-3.43644	-1.32034	-0.139596	Hexb	hexosaminidase B
1418339_at	0.0579	0.00179	-3.43597	-1.32146	-0.175458	Recql	RecQ protein-like
1436802_at	0.0582	0.0018	-3.4334	-1.32761	-0.136055	Ilf3	interleukin enhancer binding factor 3
1456019_at	0.0584	0.00181	-3.43227	-1.33031	-0.149593	Cwf19l2	CWF19-like 2, cell cycle control (S. pombe)
1443931_at	0.0584	0.00181	3.43172	-1.33163	0.350069	Zfp882	zinc finger protein 882
1451163_at	0.0584	0.00181	-3.43166	-1.33177	-0.138451	Tinf2	Terf1 (TRF1)-interacting nuclear factor 2
1451398_at	0.0584	0.00181	-3.43155	-1.33204	-0.150103	Cbr4	carbonyl reductase 4
1452374_at	0.0584	0.00181	3.43086	-1.3337	0.153678	Zfp322a	zinc finger protein 322A
1453222_at	0.0585	0.00182	3.42991	-1.33596	0.220201	Gse1	genetic suppressor element 1, coiled-coil protein
1456590_x_at	0.0585	0.00182	-3.42979	-1.33624	-0.164384	Gm6644///Akr1b3	Akr1b3 pseudogene///aldo-keto reductase family 1, member B3 (aldose reductase)
1455150_at	0.0586	0.00182	-3.42892	-1.33833	-0.285959	Hecw2	HECT, C2 and WW domain containing E3 ubiquitin protein ligase 2
1447198_at	0.0587	0.00183	3.42805	-1.34042	0.15701	Recql	RecQ protein-like
1434629_at	0.0587	0.00183	3.42757	-1.34155	0.202024	Zbtb26	zinc finger and BTB domain containing 26
1417474_at	0.0588	0.00183	-3.42675	-1.34352	-0.160656	Ift46	intraflagellar transport 46
1425452_s_at	0.0589	0.00184	3.42603	-1.34524	0.222902	Fam84a	family with sequence similarity 84, member A
1436843_at	0.0589	0.00184	3.42502	-1.34765	0.171215	Rbm12b2	RNA binding motif protein 12 B2
1436463_at	0.0589	0.00184	3.42498	-1.34774	0.168283	Jakmip2	janus kinase and microtubule interacting protein 2
1429543_at	0.059	0.00185	-3.42368	-1.35084	-0.228728	6230424C14Rik	RIKEN cDNA 6230424C14 gene
1416618_at	0.059	0.00185	-3.4236	-1.35104	-0.147828	Ppox	protoporphyrinogen oxidase
1440691_at	0.059	0.00185	-3.42353	-1.35122	-0.175427	Cyp2j6	cytochrome P450, family 2, subfamily j, polypeptide 6
1417582_s_at	0.0591	0.00185	-3.42314	-1.35213	-0.181394	Dhodh	dihydroorotate dehydrogenase
1451270_at	0.0591	0.00185	3.42256	-1.35353	0.137409	Dusp18	dual specificity phosphatase 18
1429444_at	0.0591	0.00186	3.42151	-1.35604	0.173741	Rasl11a	RAS-like, family 11, member A
1428667_at	0.0591	0.00186	-3.42138	-1.35634	-0.120726	Maoa	monoamine oxidase A
1459835_s_at	0.0591	0.00186	3.42128	-1.35659	0.199338	Dnaja1	DnaJ heat shock protein family (Hsp40) member A1
1456181_at	0.0591	0.00186	-3.42072	-1.35792	-0.191174	Wdr91	WD repeat domain 91
1428471_at	0.0591	0.00186	3.42023	-1.35909	0.139729	Sorbs1	sorbin and SH3 domain containing 1
1437279_x_at	0.0591	0.00187	-3.4201	-1.3594	-0.172728	Sdc1	syndecan 1
1436021_at	0.0591	0.00187	-3.41994	-1.35978	-0.309279	Mfsd4a	major facilitator superfamily domain containing 4A
1454321_at	0.0591	0.00187	3.41962	-1.36054	0.156745	1500005C15Rik	RIKEN cDNA 1500005C15 gene
1416328_a_at	0.0592	0.00187	3.41933	-1.36125	0.146941	Atp6v0e	ATPase, H+ transporting, lysosomal V0 subunit E
1421431_at	0.0595	0.00188	3.41668	-1.36757	0.17418	Ptrf	polymerase I and transcript release factor
1416151_at	0.0596	0.00189	3.41575	-1.3698	0.124179	Srsf3	serine/arginine-rich splicing factor 3
1428999_at	0.0599	0.0019	3.41346	-1.37527	0.121285	Phf3	PHD finger protein 3
1456041_at	0.0599	0.0019	3.41333	-1.37557	0.253557	Snx16	sorting nexin 16
1422563_at	0.0599	0.0019	3.41261	-1.37729	0.138779	Cr1l	complement component (3b/4b) receptor 1-like
1449031_at	0.0599	0.0019	3.41245	-1.37768	0.141664	Cited1	Cbp/p300-interacting transactivator with Glu/Asp-rich carboxy-terminal domain 1
1426111_x_at	0.0599	0.00191	3.41173	-1.37938	0.150101	Irf3	interferon regulatory factor 3
1460600_at	0.0599	0.00191	-3.41172	-1.37942	-0.221471	AA414768	expressed sequence AA414768
1416556_at	0.0599	0.00191	3.41144	-1.38007	0.0955699	Tspan31	tetraspanin 31
1434740_at	0.0599	0.00191	-3.4114	-1.38019	-0.187264	Scarf2	scavenger receptor class F, member 2
1441281_s_at	0.0599	0.00191	-3.41105	-1.381	-0.146039	Ninj1	ninjurin 1
1418827_at	0.06	0.00191	3.41011	-1.38325	0.189215	Eri1	exoribonuclease 1
1418458_at	0.0602	0.00192	-3.4092	-1.38543	-0.13374	Anapc7	anaphase promoting complex subunit 7
1416575_at	0.0602	0.00192	3.40873	-1.38654	0.168265	Cdc45	cell division cycle 45
1431042_at	0.0603	0.00193	3.40785	-1.38866	0.214817	Paqr8	progestin and adipoQ receptor family member VIII
1456156_at	0.0604	0.00193	-3.40683	-1.39108	-0.182169	Lepr	leptin receptor
1426348_at	0.0605	0.00193	3.40623	-1.39251	0.158864	Col4a1	collagen, type IV, alpha 1
1452380_at	0.0605	0.00194	-3.4051	-1.39521	-0.217388	Epha7	Eph receptor A7
1426985_s_at	0.0605	0.00194	-3.40509	-1.39523	-0.210795	Fam76b	family with sequence similarity 76, member B
1420831_at	0.0607	0.00195	-3.40384	-1.3982	-0.2074	Qsox1	quiescin Q6 sulfhydryl oxidase 1
1435747_at	0.0607	0.00195	-3.40351	-1.399	-0.172114	Fgf14	fibroblast growth factor 14
1442330_at	0.0609	0.00196	-3.40158	-1.4036	-0.142988	Srrm1	serine/arginine repetitive matrix 1
1449697_s_at	0.0609	0.00196	3.40067	-1.40577	0.112907	Mfn1	mitofusin 1
1433593_at	0.0609	0.00196	-3.40055	-1.40606	-0.121444	Ypel5	yippee-like 5 (Drosophila)
1460187_at	0.0609	0.00196	-3.40031	-1.40662	-0.229851	Sfrp1	secreted frizzled-related protein 1
1437874_s_at	0.0609	0.00196	-3.40024	-1.40679	-0.159318	Hexb	hexosaminidase B
1423883_at	0.061	0.00197	-3.39977	-1.40791	-0.155786	Acsl1	acyl-CoA synthetase long-chain family member 1
1459859_x_at	0.0611	0.00197	-3.39854	-1.41085	-0.161238	Chrac1	chromatin accessibility complex 1
1458119_at	0.0612	0.00198	3.39798	-1.41217	0.271873	Slc25a27	solute carrier family 25, member 27
1436642_x_at	0.0613	0.00198	-3.39691	-1.41472	-0.144998	AW047730	expressed sequence AW047730
1455149_at	0.0615	0.00199	-3.39563	-1.41779	-0.126575	Sh3rf1	SH3 domain containing ring finger 1
1426939_at	0.0615	0.00199	-3.3949	-1.41952	-0.129644	Tsr2	TSR2 20S rRNA accumulation
1460053_at	0.0615	0.00199	-3.39478	-1.4198	-0.150955	Smyd4	SET and MYND domain containing 4
1453755_at	0.0615	0.00199	3.39466	-1.42009	0.170814	Lsm11	U7 snRNP-specific Sm-like protein LSM11
1418959_at	0.0618	0.002	-3.39249	-1.42525	-0.207006	Tmprss5	transmembrane protease, serine 5 (spinesin)
1429907_at	0.0618	0.00201	3.392	-1.42643	0.156163	1700094D03Rik	RIKEN cDNA 1700094D03 gene
1444137_at	0.0618	0.00201	-3.39127	-1.42817	-0.216145	A430108G06Rik	RIKEN cDNA A430108G06 gene
1418106_at	0.0618	0.00201	3.39113	-1.4285	0.141477	Hey2	hairy/enhancer-of-split related with YRPW motif 2
1419914_s_at	0.0618	0.00201	3.3908	-1.42928	0.119323	Nus1	NUS1 dehydrodolichyl diphosphate synthase subunit
1444550_at	0.0618	0.00201	3.39057	-1.42984	0.148914	Ccdc167	coiled-coil domain containing 167
1434662_at	0.0618	0.00202	-3.39025	-1.4306	-0.14811	Atg4a	autophagy related 4A, cysteine peptidase
1416189_a_at	0.0618	0.00202	3.39019	-1.43072	0.114984	Sec61a1	Sec61 alpha 1 subunit (S. cerevisiae)
1452432_at	0.062	0.00202	-3.38875	-1.43415	-0.227846	Tfpi	tissue factor pathway inhibitor
1434054_at	0.062	0.00202	3.38868	-1.43432	0.231489	Mafg	v-maf musculoaponeurotic fibrosarcoma oncogene family, protein G (avian)
1435913_at	0.062	0.00203	-3.38862	-1.43447	-0.140042	B4galnt4	beta-1,4-N-acetyl-galactosaminyl transferase 4
1425484_at	0.0624	0.00204	-3.38572	-1.44137	-0.148486	Tox	thymocyte selection-associated high mobility group box
1418967_a_at	0.0626	0.00205	3.38417	-1.44505	0.144154	St7	suppression of tumorigenicity 7
1434403_at	0.0628	0.00206	3.3825	-1.44902	0.275286	Spred2	sprouty-related, EVH1 domain containing 2
1435807_at	0.0628	0.00206	-3.38222	-1.44969	-0.16519	Cdc42	cell division cycle 42
1444169_at	0.063	0.00207	3.38076	-1.45317	0.258733	Zfp983	zinc finger protein 983
1455034_at	0.0631	0.00207	3.37993	-1.45513	0.16937	Nr4a2	nuclear receptor subfamily 4, group A, member 2
1432772_at	0.0632	0.00208	3.37894	-1.45749	0.133592	1700081H04Rik	RIKEN cDNA 1700081H04 gene
1434639_at	0.0632	0.00208	3.37866	-1.45815	0.256325	Klhl29	kelch-like 29
1429778_at	0.0632	0.00208	-3.37859	-1.45832	-0.277652	Optn	optineurin
1424369_at	0.0633	0.00208	-3.37775	-1.46032	-0.226351	Psmf1	proteasome (prosome, macropain) inhibitor subunit 1
1438968_x_at	0.0634	0.00209	-3.37654	-1.4632	-0.201738	Spint2	serine protease inhibitor, Kunitz type 2
1427519_at	0.0635	0.00209	-3.37577	-1.46502	-0.149543	Adora2a	adenosine A2a receptor
1436703_x_at	0.0637	0.0021	-3.37434	-1.46842	-0.11931	Snapc2	small nuclear RNA activating complex, polypeptide 2
1422460_at	0.0638	0.00211	-3.37347	-1.47049	-0.177129	Mad2l1	MAD2 mitotic arrest deficient-like 1
1438976_x_at	0.0638	0.00211	3.37331	-1.47088	0.212831	Mat2a	methionine adenosyltransferase II, alpha
1438992_x_at	0.0639	0.00211	3.37229	-1.4733	0.206209	Atf4	activating transcription factor 4
1459427_at	0.0642	0.00213	3.37007	-1.47857	0.120681	Stam	signal transducing adaptor molecule (SH3 domain and ITAM motif) 1
1452310_at	0.0642	0.00213	-3.36988	-1.47901	-0.139555	Tada2a	transcriptional adaptor 2A
1436680_s_at	0.0642	0.00213	-3.36977	-1.47929	-0.135272	Ddb2	damage specific DNA binding protein 2
1429703_at	0.0643	0.00213	3.36892	-1.4813	0.186537	2900072G11Rik	RIKEN cDNA 2900072G11 gene
1433650_at	0.0643	0.00213	3.36862	-1.48201	0.169708	Haghl	hydroxyacylglutathione hydrolase-like
1427392_at	0.0645	0.00214	3.36737	-1.48498	0.17328	Dscaml1	Down syndrome cell adhesion molecule like 1
1426307_at	0.0648	0.00215	3.36525	-1.49002	0.131007	Cyb5r4	cytochrome b5 reductase 4
1425006_a_at	0.0649	0.00216	-3.36413	-1.49267	-0.187895	Vrk1	vaccinia related kinase 1
1423423_at	0.065	0.00216	3.36368	-1.49374	0.2343	Pdia3	protein disulfide isomerase associated 3
1460691_at	0.065	0.00216	3.3635	-1.49416	0.13501	Zfp598	zinc finger protein 598
1431096_at	0.0651	0.00217	3.36249	-1.49655	0.323109	Ints8	integrator complex subunit 8
1439256_x_at	0.0651	0.00217	-3.36198	-1.49776	-0.122026	Gpr137b-ps	G protein-coupled receptor 137B, pseudogene
1456844_at	0.0651	0.00217	-3.36171	-1.49841	-0.176172	Camk2d	calcium/calmodulin-dependent protein kinase II, delta
1438164_x_at	0.0652	0.00218	-3.36088	-1.50038	-0.145369	Flot2	flotillin 2
1456338_at	0.0652	0.00218	3.36074	-1.50072	0.158432	Slc38a9	solute carrier family 38, member 9
1424344_s_at	0.0652	0.00218	-3.36056	-1.50113	-0.153695	Eif1a	eukaryotic translation initiation factor 1A
1448696_at	0.0652	0.00218	3.36014	-1.50214	0.23664	Heph	hephaestin
1417635_at	0.0652	0.00218	-3.35986	-1.5028	-0.156286	Spa17	sperm autoantigenic protein 17
1436066_at	0.0652	0.00219	-3.35941	-1.50386	-0.132075	Kalrn	kalirin, RhoGEF kinase
1459874_s_at	0.0652	0.00219	3.35908	-1.50465	0.143343	Mtmr4	myotubularin related protein 4
1434665_at	0.0653	0.00219	-3.35861	-1.50576	-0.159564	Aga	aspartylglucosaminidase
1433719_at	0.0653	0.00219	-3.35813	-1.5069	-0.180719	Slc9a9	solute carrier family 9 (sodium/hydrogen exchanger), member 9
1440227_at	0.0653	0.0022	3.35763	-1.50808	0.209412	Slc5a3	solute carrier family 5 (inositol transporters), member 3
1451052_at	0.0653	0.0022	3.35745	-1.50851	0.112982	Cog8///Pdf	component of oligomeric golgi complex 8///peptide deformylase (mitochondrial)
1420791_x_at	0.0653	0.0022	3.35716	-1.50921	0.135353	Speer4f1	spermatogenesis associated glutamate (E)-rich protein 4F1
1453590_at	0.0653	0.0022	3.3569	-1.50982	0.15218	Arl5b	ADP-ribosylation factor-like 5B
1433428_x_at	0.0653	0.0022	3.35683	-1.50998	0.199463	Tgm2	transglutaminase 2, C polypeptide
1436515_at	0.0653	0.0022	3.35666	-1.51039	0.182586	Bach2	BTB and CNC homology, basic leucine zipper transcription factor 2
1460228_at	0.0653	0.0022	-3.35642	-1.51095	-0.129563	Usf2	upstream transcription factor 2
1428380_at	0.0656	0.00222	-3.35415	-1.51634	-0.12827	Atraid	all-trans retinoic acid induced differentiation factor
1417629_at	0.0657	0.00222	3.35334	-1.51825	0.184154	Prodh	proline dehydrogenase
1418522_at	0.0657	0.00222	-3.35295	-1.51917	-0.122022	Mtx1	metaxin 1
1416968_a_at	0.0657	0.00222	3.35262	-1.51997	0.174189	Hsd3b7	hydroxy-delta-5-steroid dehydrogenase, 3 beta- and steroid delta-isomerase 7
1450750_a_at	0.0657	0.00222	3.3526	-1.52	0.181954	Nr4a2	nuclear receptor subfamily 4, group A, member 2
1435092_at	0.0657	0.00222	-3.35252	-1.52021	-0.249839	Arl4a	ADP-ribosylation factor-like 4A
1456244_x_at	0.0658	0.00223	3.35136	-1.52295	0.165459	Gm12669///Glrx3	glutaredoxin 3 pseudogene///glutaredoxin 3
1434206_s_at	0.0659	0.00223	3.35082	-1.52423	0.155642	Ppp2r5c	protein phosphatase 2, regulatory subunit B', gamma
1457687_at	0.0659	0.00224	3.35	-1.52616	0.200259	Bcl2	B cell leukemia/lymphoma 2
1434161_at	0.0659	0.00224	3.3499	-1.52642	0.11096	Gm7020///Lin52	predicted gene 7020///lin-52 homolog (C. elegans)
1417576_a_at	0.0659	0.00224	3.34985	-1.52653	0.269032	Otub2	OTU domain, ubiquitin aldehyde binding 2
1428446_at	0.0663	0.00226	-3.34693	-1.53345	-0.201787	Dync2li1	dynein cytoplasmic 2 light intermediate chain 1
1434792_at	0.0663	0.00226	-3.34655	-1.53434	-0.170645	2010320M18Rik	RIKEN cDNA 2010320M18 gene
1428748_at	0.0663	0.00226	3.34646	-1.53455	0.166919	Zfp950	zinc finger protein 950
1416125_at	0.0663	0.00226	3.34614	-1.53531	0.316415	Fkbp5	FK506 binding protein 5
1435258_at	0.0663	0.00226	-3.34582	-1.53607	-0.176404	Tmem141	transmembrane protein 141
1439542_at	0.0663	0.00226	3.34575	-1.53622	0.186823	Zfp651	zinc finger protein 651
1435598_at	0.0663	0.00226	-3.34567	-1.53643	-0.169236	BB319198	expressed sequence BB319198
1432573_at	0.0664	0.00227	3.34506	-1.53787	0.163998	Xpo7	exportin 7
1453010_at	0.0664	0.00227	3.34497	-1.53807	0.177992	Iws1	IWS1 homolog (S. cerevisiae)
1423491_at	0.0664	0.00227	3.34435	-1.53954	0.116049	Fbxo3	F-box protein 3
1417323_at	0.0664	0.00227	3.3441	-1.54014	0.230519	Psrc1	proline/serine-rich coiled-coil 1
1423414_at	0.0664	0.00227	-3.34408	-1.54019	-0.12549	Ptgs1	prostaglandin-endoperoxide synthase 1
1415862_at	0.0666	0.00228	3.34264	-1.5436	0.139918	Tyrp1	tyrosinase-related protein 1
1455213_at	0.0666	0.00229	-3.342	-1.54511	-0.149868	Tmsb15b2///Tmsb15l	thymosin beta 15b2///thymosin beta 15b like
1428475_at	0.0666	0.00229	3.34188	-1.54539	0.119011	Llph-ps2///Llph-ps1///Llph	LLP homolog, pseudogene 2///LLP homolog, pseudogene 1///LLP homolog, long-term synaptic facilitation (Aplysia)
1417125_at	0.0666	0.00229	-3.34149	-1.54631	-0.176869	Ahcy	S-adenosylhomocysteine hydrolase
1420124_s_at	0.0666	0.00229	-3.34131	-1.54673	-0.182909	Tcta	T cell leukemia translocation altered gene
1434229_a_at	0.0666	0.00229	3.34112	-1.54719	0.148468	Polb	polymerase (DNA directed), beta
1428835_at	0.0666	0.00229	-3.34111	-1.54721	-0.0934713	Myh14	myosin, heavy polypeptide 14
1455654_at	0.0667	0.0023	3.34036	-1.549	0.219989	Hjurp///A730008H23Rik	Holliday junction recognition protein///RIKEN cDNA A730008H23 gene
1435402_at	0.0669	0.00231	3.33887	-1.55253	0.162012	Gramd1b	GRAM domain containing 1B
1449523_at	0.067	0.00231	-3.33823	-1.55402	-0.163649	Bcl7c	B cell CLL/lymphoma 7C
1416600_a_at	0.067	0.00231	3.33755	-1.55564	0.122143	Rcan1	regulator of calcineurin 1
1426124_a_at	0.0672	0.00232	3.33655	-1.55801	0.196203	Clk1	CDC-like kinase 1
1444452_at	0.0672	0.00232	-3.33619	-1.55886	-0.230061	D930002L09Rik	RIKEN cDNA D930002L09 gene
1452977_at	0.0673	0.00233	3.33552	-1.56043	0.167785	Zhx3	zinc fingers and homeoboxes 3
1423107_at	0.0674	0.00233	3.33438	-1.56313	0.0950358	Ube2b	ubiquitin-conjugating enzyme E2B
1436082_at	0.0675	0.00234	-3.33365	-1.56485	-0.185784	Myef2	myelin basic protein expression factor 2, repressor
1424917_a_at	0.0675	0.00234	-3.33308	-1.5662	-0.206529	Wipi1	WD repeat domain, phosphoinositide interacting 1
1449043_at	0.0675	0.00234	-3.33269	-1.56714	-0.176504	Naga	N-acetyl galactosaminidase, alpha
1452634_at	0.0675	0.00234	3.33251	-1.56755	0.155362	Obox3	oocyte specific homeobox 3
1429905_at	0.0675	0.00234	3.33249	-1.56761	0.211455	Lhx9	LIM homeobox protein 9
1448597_at	0.0675	0.00234	-3.33234	-1.56797	-0.204684	Cstf1	cleavage stimulation factor, 3' pre-RNA, subunit 1
1431805_a_at	0.0675	0.00235	3.33203	-1.56868	0.236291	Rhpn2	rhophilin, Rho GTPase binding protein 2
1449072_a_at	0.0676	0.00235	3.33106	-1.57099	0.168802	Eef1akmt1	eukaryotic translation elongation factor 1 alpha lysine methyltransferase 1
1454623_at	0.0676	0.00235	-3.33086	-1.57146	-0.147625	Cpa2	carboxypeptidase A2, pancreatic
1442811_at	0.0676	0.00235	3.33073	-1.57177	0.22186	Rgmb	repulsive guidance molecule family member B
1430579_at	0.0679	0.00237	-3.3285	-1.57702	-0.257215	Tnik	TRAF2 and NCK interacting kinase
1440221_at	0.0679	0.00237	-3.32824	-1.57764	-0.201411	AA408650	expressed sequence AA408650
1448663_s_at	0.0679	0.00237	-3.32798	-1.57826	-0.154576	Mvd	mevalonate (diphospho) decarboxylase
1431002_x_at	0.068	0.00237	-3.32759	-1.57919	-0.163769	Fahd2a	fumarylacetoacetate hydrolase domain containing 2A
1436737_a_at	0.068	0.00238	3.32735	-1.57975	0.179249	Sorbs1	sorbin and SH3 domain containing 1
1423162_s_at	0.0684	0.00239	3.32483	-1.58569	0.163574	Spred1	sprouty protein with EVH-1 domain 1, related sequence
1426311_s_at	0.0684	0.00239	3.3247	-1.586	0.153421	Zdhhc5	zinc finger, DHHC domain containing 5
1428760_at	0.0685	0.0024	3.32355	-1.58873	0.169963	Snapc3	small nuclear RNA activating complex, polypeptide 3
1440235_at	0.0685	0.0024	3.3233	-1.58932	0.16899	Itga10	integrin, alpha 10
1430035_at	0.0688	0.00241	-3.3212	-1.59426	-0.145342	Vps50	VPS50 EARP/GARPII complex subunit
1438044_at	0.069	0.00242	-3.31984	-1.59747	-0.163204	1700047M11Rik	RIKEN cDNA 1700047M11 gene
1426441_at	0.0692	0.00243	-3.31885	-1.59981	-0.207214	Slc11a2	solute carrier family 11 (proton-coupled divalent metal ion transporters), member 2
1444546_at	0.0692	0.00243	3.3182	-1.60134	0.213213	Tifab	TRAF-interacting protein with forkhead-associated domain, family member B
1437671_x_at	0.0693	0.00244	3.31743	-1.60317	0.1725	Prss23	protease, serine 23
1422631_at	0.0693	0.00244	-3.31731	-1.60345	-0.159864	Ahr	aryl-hydrocarbon receptor
1425287_at	0.0693	0.00244	3.31708	-1.60398	0.190918	Zfp189	zinc finger protein 189
1455249_at	0.0693	0.00244	-3.31705	-1.60406	-0.144599	Slc36a4	solute carrier family 36 (proton/amino acid symporter), member 4
1448609_at	0.0694	0.00244	-3.31643	-1.60553	-0.144977	Tst	thiosulfate sulfurtransferase, mitochondrial
1428311_at	0.0699	0.00246	3.31311	-1.61335	0.176778	Ccdc6	coiled-coil domain containing 6
1435228_at	0.07	0.00247	3.31191	-1.61617	0.153959	BC023829	cDNA sequence BC023829
1451477_at	0.07	0.00247	3.31158	-1.61696	0.270411	Zfp991	zinc finger protein 991
1429736_at	0.07	0.00248	-3.31099	-1.61835	-0.18839	Qk	quaking
1426721_s_at	0.07	0.00248	3.31072	-1.61899	0.198114	Tiparp	TCDD-inducible poly(ADP-ribose) polymerase
1440902_at	0.07	0.00248	3.31049	-1.61953	0.185957	Ermn	ermin, ERM-like protein
1460064_at	0.07	0.00248	3.31043	-1.61967	0.185989	BC028789	cDNA sequence BC028789
1453517_at	0.07	0.00248	-3.31035	-1.61986	-0.150206	Metap1d	methionyl aminopeptidase type 1D (mitochondrial)
1417216_at	0.07	0.00248	3.31019	-1.62024	0.106472	Pim2	proviral integration site 2
1428557_a_at	0.07	0.00248	-3.31004	-1.6206	-0.187585	Osgepl1	O-sialoglycoprotein endopeptidase-like 1
1418084_at	0.0701	0.00249	3.30879	-1.62353	0.170448	Nrp1	neuropilin 1
1450784_at	0.0701	0.00249	-3.3086	-1.62398	-0.199113	Reck	reversion-inducing-cysteine-rich protein with kazal motifs
1422452_at	0.0701	0.00249	3.30848	-1.62428	0.179086	Bag3	BCL2-associated athanogene 3
1450394_at	0.0701	0.00249	3.30846	-1.62431	0.166156	Golph3	golgi phosphoprotein 3
1430155_at	0.0702	0.0025	3.30804	-1.6253	0.130304	4933427E11Rik	RIKEN cDNA 4933427E11 gene
1425632_a_at	0.0702	0.0025	-3.30774	-1.626	-0.209085	Pqlc2	PQ loop repeat containing 2
1451347_at	0.0702	0.0025	3.30717	-1.62735	0.288139	Ino80e	INO80 complex subunit E
1426772_x_at	0.0702	0.0025	-3.30708	-1.62757	-0.171774	Tcrb-J	T cell receptor beta, joining region
1424420_at	0.0703	0.00251	3.30613	-1.6298	0.142025	Ccpg1	cell cycle progression 1
1433940_at	0.0703	0.00251	-3.30534	-1.63165	-0.123302	Spag7	sperm associated antigen 7
1429175_at	0.0703	0.00252	3.30519	-1.63201	0.118316	Tmem178	transmembrane protein 178
1442565_at	0.0703	0.00252	-3.30518	-1.63205	-0.140592	Pcdh10	protocadherin 10
1436176_at	0.0703	0.00252	3.30509	-1.63225	0.237572	1500004A13Rik	RIKEN cDNA 1500004A13 gene
1420745_a_at	0.0704	0.00252	-3.30429	-1.63414	-0.132397	Ccndbp1	cyclin D-type binding-protein 1
1447623_s_at	0.0704	0.00252	3.30398	-1.63486	0.155405	Prkd1	protein kinase D1
1434159_at	0.0706	0.00253	3.3026	-1.63813	0.142002	Stk4	serine/threonine kinase 4
1436724_a_at	0.0707	0.00254	-3.30181	-1.63998	-0.17879	Eif2d	eukaryotic translation initiation factor 2D
1436594_at	0.0707	0.00254	3.3016	-1.64046	0.14072	Zfp719	zinc finger protein 719
1416791_a_at	0.0707	0.00254	3.30112	-1.64161	0.136498	Nxf1	nuclear RNA export factor 1
1437030_at	0.0711	0.00256	3.29869	-1.64732	0.161562	Plcd4	phospholipase C, delta 4
1459838_s_at	0.0711	0.00256	-3.29858	-1.64759	-0.116596	Btbd11	BTB (POZ) domain containing 11
1434223_at	0.0711	0.00256	-3.29833	-1.64817	-0.191742	LOC102643079///Oscp1	uncharacterized LOC102643079///organic solute carrier partner 1
1437783_x_at	0.0711	0.00256	3.29812	-1.64867	0.136252	Cnpy2	canopy FGF signaling regulator 2
1421204_a_at	0.0711	0.00257	-3.29735	-1.65047	-0.15392	Nudt16	nudix (nucleoside diphosphate linked moiety X)-type motif 16
1453795_at	0.0714	0.00258	-3.29578	-1.65416	-0.154592	Fahd2a	fumarylacetoacetate hydrolase domain containing 2A
1419765_at	0.0714	0.00258	-3.29509	-1.6558	-0.256222	Cul2	cullin 2
1431737_at	0.0715	0.00259	-3.29438	-1.65746	-0.18769	Gm7008	predicted gene 7008
1428202_at	0.0715	0.00259	-3.29433	-1.65758	-0.136192	Fam3a	family with sequence similarity 3, member A
1437363_at	0.0715	0.00259	3.29348	-1.65959	0.168309	Homer1	homer scaffolding protein 1
1418355_at	0.0715	0.00259	-3.29338	-1.65981	-0.156927	Nucb2	nucleobindin 2
1448992_at	0.0716	0.0026	3.29277	-1.66124	0.16084	Ina	internexin neuronal intermediate filament protein, alpha
1429970_at	0.0716	0.0026	3.29252	-1.66185	0.126936	Spaca3	sperm acrosome associated 3
1446357_at	0.0716	0.0026	-3.29216	-1.66269	-0.152633	BC020402	cDNA sequence BC020402
1436829_at	0.0717	0.0026	3.29175	-1.66365	0.172648	Trim67	tripartite motif-containing 67
1424831_at	0.0717	0.00261	-3.29133	-1.66463	-0.126289	Cpne2	copine II
1424489_a_at	0.0718	0.00261	-3.29062	-1.6663	-0.15374	Trit1	tRNA isopentenyltransferase 1
1436254_at	0.0718	0.00261	-3.2904	-1.66682	-0.146502	Ube2f	ubiquitin-conjugating enzyme E2F (putative)
1433859_at	0.072	0.00262	-3.28897	-1.67018	-0.150882	Ino80c	INO80 complex subunit C
1438430_at	0.072	0.00262	-3.28884	-1.67049	-0.121904	Hbp1	high mobility group box transcription factor 1
1455389_s_at	0.072	0.00263	3.28822	-1.67196	0.174887	Ago2	argonaute RISC catalytic subunit 2
1434877_at	0.072	0.00263	3.28818	-1.67203	0.141904	Nptx1	neuronal pentraxin 1
1445849_at	0.0721	0.00263	-3.28781	-1.6729	-0.140989	BC080696	cDNA sequence BC080696
1434779_at	0.0721	0.00263	3.28728	-1.67415	0.161122	Cbln2	cerebellin 2 precursor protein
1453122_at	0.0721	0.00264	-3.28686	-1.67514	-0.152082	Fam135a	family with sequence similarity 135, member A
1434723_at	0.0721	0.00264	-3.28664	-1.67567	-0.174527	E130307A14Rik	RIKEN cDNA E130307A14 gene
1420367_at	0.0723	0.00265	-3.28547	-1.67841	-0.230927	Denr	density-regulated protein
1423106_at	0.0724	0.00265	3.28476	-1.68009	0.0972016	Ube2b	ubiquitin-conjugating enzyme E2B
1452849_at	0.0724	0.00265	3.28451	-1.68066	0.130169	Sin3b	transcriptional regulator, SIN3B (yeast)
1454044_a_at	0.0727	0.00267	-3.28254	-1.6853	-0.126199	Pex3	peroxisomal biogenesis factor 3
1432006_at	0.0728	0.00267	-3.28204	-1.68647	-0.180487	Ap2a2	adaptor-related protein complex 2, alpha 2 subunit
1453447_at	0.0728	0.00267	-3.28146	-1.68782	-0.157527	1700109H08Rik	RIKEN cDNA 1700109H08 gene
1451776_s_at	0.0728	0.00268	-3.28112	-1.68863	-0.131276	Hopx	HOP homeobox
1420840_at	0.0728	0.00268	3.2811	-1.68867	0.14157	Plekha3	pleckstrin homology domain-containing, family A (phosphoinositide binding specific) member 3
1420533_at	0.0732	0.00269	-3.27856	-1.69462	-0.197101	Gucy1a3	guanylate cyclase 1, soluble, alpha 3
1417630_at	0.0732	0.0027	-3.27842	-1.69497	-0.135848	Mknk1	MAP kinase-interacting serine/threonine kinase 1
1433832_at	0.0734	0.0027	-3.2771	-1.69805	-0.118905	Sun2	Sad1 and UNC84 domain containing 2
1452230_at	0.0734	0.00271	-3.27693	-1.69846	-0.118663	Dnajc10	DnaJ heat shock protein family (Hsp40) member C10
1426715_s_at	0.0734	0.00271	-3.27636	-1.6998	-0.128869	Slc46a1	solute carrier family 46, member 1
1453402_at	0.0737	0.00272	-3.27458	-1.70397	-0.243709	6430500C12Rik	RIKEN cDNA 6430500C12 gene
1451085_at	0.0737	0.00273	-3.27423	-1.70479	-0.193897	C030006K11Rik	RIKEN cDNA C030006K11 gene
1416538_at	0.074	0.00274	3.27275	-1.70827	0.196069	Siae	sialic acid acetylesterase
1429564_at	0.074	0.00274	3.27209	-1.70981	0.158404	Pcgf5	polycomb group ring finger 5
1459853_x_at	0.074	0.00274	-3.27196	-1.71013	-0.13934	Sde2	SDE2 telomere maintenance homolog (S. pombe)
1418058_at	0.0742	0.00275	3.27061	-1.71328	0.181683	Adgrl4	adhesion G protein-coupled receptor L4
1416469_at	0.0743	0.00275	3.27026	-1.71412	0.176876	Luzp1	leucine zipper protein 1
1444310_at	0.0744	0.00276	3.26921	-1.71658	0.173228	Polr3a	polymerase (RNA) III (DNA directed) polypeptide A
1422129_at	0.0744	0.00276	-3.26904	-1.71697	-0.171696	Apc2	adenomatosis polyposis coli 2
1430593_at	0.0744	0.00277	3.26822	-1.71888	0.168548	Ccdc30	coiled-coil domain containing 30
1418494_at	0.0745	0.00277	-3.26768	-1.72016	-0.213249	Ebf2	early B cell factor 2
1455683_a_at	0.0745	0.00277	-3.26747	-1.72066	-0.177039	Tbc1d8	TBC1 domain family, member 8
1436106_x_at	0.0746	0.00278	-3.26656	-1.72279	-0.123773	Ccdc74a	coiled-coil domain containing 74A
1417770_s_at	0.0747	0.00279	-3.26579	-1.72459	-0.157102	Psmc6	proteasome (prosome, macropain) 26S subunit, ATPase, 6
1460588_at	0.0747	0.00279	-3.26541	-1.72546	-0.307082	Carf	calcium response factor
1441783_at	0.0748	0.00279	-3.26469	-1.72715	-0.241197	2410022M11Rik	RIKEN cDNA 2410022M11 gene
1428355_at	0.0753	0.00281	-3.2617	-1.73416	-0.10486	Osbp2	oxysterol binding protein 2
1454128_at	0.0754	0.00282	3.26122	-1.73529	0.159154	4930413E15Rik	RIKEN cDNA 4930413E15 gene
1453678_at	0.0756	0.00283	-3.26006	-1.73801	-0.155949	Mbd1	methyl-CpG binding domain protein 1
1435396_at	0.0756	0.00283	-3.2596	-1.73908	-0.111878	Stxbp6	syntaxin binding protein 6 (amisyn)
1423655_a_at	0.0757	0.00284	-3.25853	-1.74159	-0.109516	Ctc1	CTS telomere maintenance complex component 1
1424880_at	0.0757	0.00284	3.2584	-1.7419	0.232558	Trib1	tribbles pseudokinase 1
1429617_at	0.0757	0.00284	3.25826	-1.74221	0.199076	Cyld	CYLD lysine 63 deubiquitinase
1448581_at	0.0758	0.00285	-3.2573	-1.74447	-0.197024	Zfp346	zinc finger protein 346
1453141_at	0.0758	0.00285	-3.25708	-1.74497	-0.161495	0610009L18Rik	RIKEN cDNA 0610009L18 gene
1440864_at	0.0758	0.00285	-3.25699	-1.74518	-0.239169	AI836737	expressed sequence AI836737
1425782_at	0.0758	0.00285	3.25689	-1.74543	0.14682	Plcb1	phospholipase C, beta 1
1455715_at	0.0759	0.00286	-3.25607	-1.74735	-0.157933	Gm1976	predicted gene 1976
1417321_at	0.076	0.00286	3.25537	-1.74897	0.117315	Zcchc7	zinc finger, CCHC domain containing 7
1419247_at	0.0763	0.00287	3.25371	-1.75286	0.126777	Rgs2	regulator of G-protein signaling 2
1418052_at	0.0764	0.00288	-3.25327	-1.75389	-0.131177	Mvk	mevalonate kinase
1446154_at	0.0764	0.00288	-3.25253	-1.75562	-0.193906	Gm15743	predicted gene 15743
1448662_at	0.0764	0.00288	-3.25218	-1.75643	-0.198755	Fzd6	frizzled class receptor 6
1436360_at	0.0764	0.00289	3.25192	-1.75704	0.183667	Zscan22	zinc finger and SCAN domain containing 22
1418255_s_at	0.0764	0.00289	3.25175	-1.75744	0.136047	Srf	serum response factor
1453565_at	0.0764	0.00289	3.25169	-1.7576	0.155204	Ndufab1	NADH dehydrogenase (ubiquinone) 1, alpha/beta subcomplex, 1
1446344_at	0.0764	0.00289	3.25146	-1.75813	0.144501	Nyx	nyctalopin
1457337_at	0.0764	0.00289	-3.25126	-1.75859	-0.172814	Airn	antisense Igf2r RNA
1439341_at	0.0764	0.00289	-3.25094	-1.75935	-0.188962	Greb1l	growth regulation by estrogen in breast cancer-like
1428754_at	0.0764	0.0029	-3.25057	-1.76021	-0.127168	Trmt6	tRNA methyltransferase 6
1436921_at	0.0766	0.00291	3.24939	-1.76298	0.170698	Atp7a	ATPase, Cu++ transporting, alpha polypeptide
1454814_s_at	0.0766	0.00291	3.24916	-1.7635	0.185333	Prps1l3	phosphoribosyl pyrophosphate synthetase 1-like 3
1456174_x_at	0.0767	0.00291	3.24852	-1.76501	0.109619	Ndrg1	N-myc downstream regulated gene 1
1458656_at	0.0767	0.00292	-3.24806	-1.76607	-0.14793	Gm32031	predicted gene, 32031
1456236_s_at	0.0768	0.00292	-3.24721	-1.76806	-0.147035	Commd10	COMM domain containing 10
1423904_a_at	0.0769	0.00293	3.24649	-1.76974	0.237558	Pvr	poliovirus receptor
1448185_at	0.0769	0.00293	3.24616	-1.77052	0.162833	Herpud1	homocysteine-inducible, endoplasmic reticulum stress-inducible, ubiquitin-like domain member 1
1434283_at	0.077	0.00294	3.24529	-1.77255	0.181683	Arid5b	AT rich interactive domain 5B (MRF1-like)
1449414_at	0.077	0.00294	-3.24515	-1.77289	-0.14394	Zfp53	zinc finger protein 53
1426236_a_at	0.077	0.00294	3.24511	-1.77296	0.0898197	Glul	glutamate-ammonia ligase (glutamine synthetase)
1457054_a_at	0.0771	0.00294	-3.24439	-1.77465	-0.158452	D130020L05Rik	RIKEN cDNA D130020L05 gene
1448690_at	0.0773	0.00295	3.24331	-1.77717	0.126415	Kcnk1	potassium channel, subfamily K, member 1
1422871_at	0.0773	0.00295	3.24306	-1.77776	0.169975	Kcnj12	potassium inwardly-rectifying channel, subfamily J, member 12
1439198_at	0.0774	0.00296	3.24216	-1.77987	0.186553	C85445	expressed sequence C85445
1417972_s_at	0.0777	0.00298	3.24002	-1.78485	0.164006	Pop5	processing of precursor 5, ribonuclease P/MRP family (S. cerevisiae)
1429478_at	0.0777	0.00298	-3.24002	-1.78487	-0.31256	Bora	bora, aurora kinase A activator
1434944_at	0.0777	0.00298	3.23985	-1.78526	0.201897	Dmpk	dystrophia myotonica-protein kinase
1451037_at	0.0777	0.00298	3.23952	-1.78604	0.193477	Ptpn9	protein tyrosine phosphatase, non-receptor type 9
1448382_at	0.0778	0.00298	-3.23897	-1.78731	-0.218748	Ehhadh	enoyl-Coenzyme A, hydratase/3-hydroxyacyl Coenzyme A dehydrogenase
1416586_at	0.0778	0.00299	-3.23852	-1.78836	-0.127864	Zfp239	zinc finger protein 239
1451177_at	0.078	0.003	3.23724	-1.79134	0.182008	Dnajb4	DnaJ heat shock protein family (Hsp40) member B4
1430298_at	0.0781	0.003	3.23678	-1.79244	0.14651	Ccdc171	coiled-coil domain containing 171
1418395_at	0.0783	0.00301	-3.23546	-1.7955	-0.228777	Slc47a1	solute carrier family 47, member 1
1436559_a_at	0.0783	0.00302	3.23472	-1.79724	0.121803	Psmd10	proteasome (prosome, macropain) 26S subunit, non-ATPase, 10
1450875_at	0.0783	0.00302	-3.23455	-1.79762	-0.175321	Gpr37	G protein-coupled receptor 37
1426586_at	0.0783	0.00302	-3.23444	-1.79788	-0.108666	Slc25a11	solute carrier family 25 (mitochondrial carrier oxoglutarate carrier), member 11
1418152_at	0.0785	0.00303	3.23335	-1.80044	0.136709	Hmgn5	high-mobility group nucleosome binding domain 5
1454840_at	0.0785	0.00303	-3.23312	-1.80097	-0.228587	Mccc2	methylcrotonoyl-Coenzyme A carboxylase 2 (beta)
1439093_at	0.0786	0.00303	3.2324	-1.80263	0.113864	Hspa4l	heat shock protein 4 like
1449383_at	0.0787	0.00304	-3.23178	-1.8041	-0.202372	Adssl1	adenylosuccinate synthetase like 1
1435594_at	0.0787	0.00304	-3.23162	-1.80446	-0.155966	Atl2	atlastin GTPase 2
1436733_at	0.0787	0.00304	-3.23112	-1.80564	-0.170135	Plppr1	phospholipid phosphatase related 1
1440234_at	0.079	0.00306	-3.22953	-1.80934	-0.140025	Lyrm9	LYR motif containing 9
1422505_at	0.0793	0.00307	-3.2278	-1.81338	-0.158137	Chrac1	chromatin accessibility complex 1
1425196_a_at	0.0793	0.00307	-3.22731	-1.81451	-0.11354	Hint2	histidine triad nucleotide binding protein 2
1455098_a_at	0.0794	0.00308	-3.22634	-1.81678	-0.159859	Vtn	vitronectin
1451747_a_at	0.0794	0.00308	3.2261	-1.81734	0.14165	Atg12	autophagy related 12
1422196_at	0.0795	0.00309	3.22533	-1.81914	0.21106	Htr5b	5-hydroxytryptamine (serotonin) receptor 5B
1448600_s_at	0.0795	0.00309	3.22522	-1.81938	0.189549	Vav3	vav 3 oncogene
1433660_at	0.0798	0.0031	3.2237	-1.82293	0.136011	Tubgcp4	tubulin, gamma complex associated protein 4
1425381_a_at	0.08	0.00311	-3.22234	-1.8261	-0.169482	Tfr2	transferrin receptor 2
1457021_x_at	0.0801	0.00312	3.22169	-1.82761	0.165558	Amhr2	anti-Mullerian hormone type 2 receptor
1460630_at	0.0807	0.00314	-3.2188	-1.83435	-0.156697	Camk2d	calcium/calmodulin-dependent protein kinase II, delta
1434273_at	0.0807	0.00315	3.21835	-1.83539	0.144096	Fam174b	family with sequence similarity 174, member B
1424902_at	0.0807	0.00315	-3.21794	-1.83633	-0.205775	Plxdc1	plexin domain containing 1
1430452_at	0.0807	0.00315	-3.21791	-1.83642	-0.164895	Cyp20a1	cytochrome P450, family 20, subfamily a, polypeptide 1
1431946_a_at	0.0807	0.00315	-3.2175	-1.83736	-0.180102	Necab3	N-terminal EF-hand calcium binding protein 3
1416376_at	0.0807	0.00315	-3.21738	-1.83764	-0.136941	Tmem97	transmembrane protein 97
1439516_at	0.0807	0.00316	-3.21717	-1.83814	-0.165335	2610201A13Rik	RIKEN cDNA 2610201A13 gene
1438972_x_at	0.0807	0.00316	-3.21713	-1.83824	-0.226814	2810410L24Rik	RIKEN cDNA 2810410L24 gene
1437895_at	0.0807	0.00316	-3.21674	-1.83914	-0.176655	Ano8	anoctamin 8
1422535_at	0.0807	0.00316	-3.21642	-1.83989	-0.257878	Ccne2	cyclin E2
1416635_at	0.0807	0.00316	-3.21639	-1.83996	-0.110915	Smpdl3a	sphingomyelin phosphodiesterase, acid-like 3A
1460546_at	0.0807	0.00317	-3.21603	-1.84079	-0.201208	Lgi3	leucine-rich repeat LGI family, member 3
1432108_at	0.0808	0.00317	3.21557	-1.84186	0.215441	Pcgf6	polycomb group ring finger 6
1428747_at	0.0808	0.00317	-3.21508	-1.84299	-0.139396	Trnau1ap	tRNA selenocysteine 1 associated protein 1
1423717_at	0.0808	0.00317	3.21494	-1.84332	0.130314	Ak3	adenylate kinase 3
1453373_at	0.0808	0.00318	-3.21473	-1.84382	-0.15256	Il1rapl1	interleukin 1 receptor accessory protein-like 1
1428603_at	0.0809	0.00318	-3.2143	-1.84482	-0.124915	Umad1	UMAP1-MVP12 associated (UMA) domain containing 1
1416150_a_at	0.0811	0.00319	3.21287	-1.84814	0.120296	Srsf3	serine/arginine-rich splicing factor 3
1436446_at	0.0811	0.00319	3.21277	-1.84838	0.173249	8030462N17Rik	RIKEN cDNA 8030462N17 gene
1436595_at	0.0811	0.00319	-3.21238	-1.84929	-0.165578	Rbm34	RNA binding motif protein 34
1452771_s_at	0.0811	0.0032	3.21235	-1.84934	0.121796	Acsl3	acyl-CoA synthetase long-chain family member 3
1437647_at	0.0811	0.0032	-3.21196	-1.85027	-0.231099	Dido1	death inducer-obliterator 1
1439443_x_at	0.0811	0.0032	-3.21184	-1.85053	-0.105249	Tkt	transketolase
1437267_x_at	0.0812	0.00321	3.21104	-1.8524	0.184796	Hnrnph1	heterogeneous nuclear ribonucleoprotein H1
1437470_at	0.0812	0.00321	3.21059	-1.85345	0.182176	Pknox1	Pbx/knotted 1 homeobox
1436205_at	0.0812	0.00321	3.21018	-1.85439	0.127285	Nfasc	neurofascin
1436367_at	0.0812	0.00321	-3.2101	-1.85458	-0.13395	Ptprb	protein tyrosine phosphatase, receptor type, B
1420858_at	0.0812	0.00321	-3.21	-1.85483	-0.173125	Pkia	protein kinase inhibitor, alpha
1415909_at	0.0812	0.00322	3.20965	-1.85564	0.195363	Stip1	stress-induced phosphoprotein 1
1418545_at	0.0812	0.00322	-3.209	-1.85713	-0.105006	Wasf1	WAS protein family, member 1
1435224_at	0.0812	0.00322	3.209	-1.85715	0.142652	Crebbp	CREB binding protein
1436526_at	0.0812	0.00322	3.20888	-1.85741	0.124439	Gnptg	N-acetylglucosamine-1-phosphotransferase, gamma subunit
1426359_at	0.0814	0.00323	3.20783	-1.85986	0.148416	Zbed6///Zc3h11a	zinc finger, BED type containing 6///zinc finger CCCH type containing 11A
1453309_at	0.0815	0.00324	-3.20702	-1.86175	-0.205225	9330179D12Rik	RIKEN cDNA 9330179D12 gene
1423606_at	0.0816	0.00324	-3.20635	-1.8633	-0.168634	Postn	periostin, osteoblast specific factor
1423398_at	0.0817	0.00325	3.20566	-1.86491	0.18975	Taf12	TATA-box binding protein associated factor 12
1428249_at	0.0817	0.00325	3.2056	-1.86505	0.119011	Pygo2	pygopus 2
1429470_at	0.0817	0.00325	-3.20546	-1.86538	-0.202306	Spdya	speedy/RINGO cell cycle regulator family, member A
1429173_at	0.0818	0.00326	-3.20418	-1.86833	-0.171448	Dnase1l1	deoxyribonuclease 1-like 1
1433478_at	0.0818	0.00326	-3.20416	-1.8684	-0.180042	Parl	presenilin associated, rhomboid-like
1427876_at	0.0818	0.00326	3.204	-1.86877	0.0915125	Zc3h15	zinc finger CCCH-type containing 15
1423805_at	0.0818	0.00327	-3.2038	-1.86922	-0.122825	Dab2	disabled 2, mitogen-responsive phosphoprotein
1456510_x_at	0.0819	0.00327	3.20335	-1.87027	0.171832	Mettl7a2	methyltransferase like 7A2
1454836_at	0.0821	0.00328	-3.20224	-1.87285	-0.138627	Tmem18	transmembrane protein 18
1458882_at	0.0821	0.00328	3.20166	-1.8742	0.193355	Serpinb8	serine (or cysteine) peptidase inhibitor, clade B, member 8
1423213_at	0.0822	0.00329	3.20126	-1.87512	0.121593	Plxnc1	plexin C1
1422890_at	0.0824	0.0033	-3.2002	-1.87759	-0.183308	Pcdh18	protocadherin 18
1418721_at	0.0824	0.0033	3.19994	-1.87818	0.147758	Cops7b	COP9 signalosome subunit 7B
1422231_a_at	0.0824	0.0033	3.19974	-1.87866	0.295491	Tnfrsf25	tumor necrosis factor receptor superfamily, member 25
1428711_at	0.0825	0.00331	-3.1988	-1.88084	-0.151969	Mon1b	MON1 homolog B, secretory traffciking associated
1418932_at	0.0825	0.00331	3.19849	-1.88155	0.298631	Nfil3	nuclear factor, interleukin 3, regulated
1433905_at	0.0825	0.00331	-3.19845	-1.88164	-0.133747	Akap7	A kinase (PRKA) anchor protein 7
1430030_at	0.0826	0.00332	3.19772	-1.88334	0.208756	Dubr	Dppa2 upstream binding RNA
1429118_a_at	0.0826	0.00332	-3.19745	-1.88398	-0.143216	Gin1	gypsy retrotransposon integrase 1
1459857_at	0.0827	0.00332	-3.19687	-1.88532	-0.178343	Usp32	ubiquitin specific peptidase 32
1441878_s_at	0.0828	0.00333	-3.19617	-1.88694	-0.156618	Oxld1	oxidoreductase like domain containing 1
1432176_a_at	0.083	0.00334	-3.19507	-1.8895	-0.145924	Eng	endoglin
1431393_at	0.083	0.00334	-3.1948	-1.89012	-0.258521	4930447C04Rik	RIKEN cDNA 4930447C04 gene
1439455_x_at	0.083	0.00335	3.19426	-1.89137	0.111897	Capza1	capping protein (actin filament) muscle Z-line, alpha 1
1448417_at	0.083	0.00335	-3.19419	-1.89154	-0.134408	Ninj1	ninjurin 1
1436045_at	0.083	0.00335	3.19401	-1.89195	0.181585	Tsga10	testis specific 10
1415965_at	0.083	0.00335	-3.19347	-1.89321	-0.269533	Scd1	stearoyl-Coenzyme A desaturase 1
1431811_a_at	0.083	0.00335	-3.19347	-1.89322	-0.119233	Fbxo34	F-box protein 34
1440311_at	0.083	0.00335	3.19332	-1.89357	0.141384	Sorbs1	sorbin and SH3 domain containing 1
1429956_at	0.0831	0.00336	-3.19253	-1.8954	-0.192296	Tbata	thymus, brain and testes associated
1417003_at	0.0831	0.00336	3.19216	-1.89625	0.171034	0610012G03Rik	RIKEN cDNA 0610012G03 gene
1457841_at	0.0831	0.00337	-3.19211	-1.89636	-0.124484	Gm20362	predicted gene, 20362
1443563_at	0.0831	0.00337	3.19172	-1.89728	0.124962	Opa3	optic atrophy 3
1428014_at	0.0831	0.00337	3.19171	-1.89729	0.189094	Hist1h4m///Hist1h4b///Hist1h4a///Hist4h4///Hist1h4n///Hist1h4k///Hist1h4j///Hist1h4i///Hist1h4f///Hist1h4d///Hist1h4c///Hist2h4///Hist1h4h	histone cluster 1, H4m///histone cluster 1, H4b///histone cluster 1, H4a///histone cluster 4, H4///histone cluster 1, H4n///histone cluster 1, H4k///histone cluster 1, H4j///histone cluster 1, H4i///histone cluster 1, H4f///histone cluster 1, H4d///histone cluster 1, H4c///histone cluster 2, H4///histone cluster 1, H4h
1455391_at	0.0831	0.00337	-3.19161	-1.89754	-0.1175	Rad23a	RAD23 homolog A, nucleotide excision repair protein
1423867_at	0.0833	0.00338	3.19063	-1.89979	0.144587	Serpina3k	serine (or cysteine) peptidase inhibitor, clade A, member 3K
1429252_at	0.0834	0.00338	-3.1899	-1.90149	-0.161831	0610010K14Rik///Rnasek	RIKEN cDNA 0610010K14 gene///ribonuclease, RNase K
1458669_at	0.0834	0.00339	-3.1895	-1.90242	-0.262319	Agpat5	1-acylglycerol-3-phosphate O-acyltransferase 5 (lysophosphatidic acid acyltransferase, epsilon)
1424810_at	0.0836	0.0034	-3.18846	-1.90483	-0.15075	Tasp1	taspase, threonine aspartase 1
1452049_at	0.0836	0.0034	3.18845	-1.90486	0.159969	Rpl7l1	ribosomal protein L7-like 1
1456684_at	0.0836	0.0034	-3.18797	-1.90596	-0.147943	Tmem74	transmembrane protein 74
1435425_at	0.0838	0.00341	3.18693	-1.90838	0.173366	Pisd-ps1///Pisd-ps3	phosphatidylserine decarboxylase, pseudogene 1///phosphatidylserine decarboxylase, pseudogene 3
1426373_at	0.0838	0.00341	3.18689	-1.90848	0.209421	Ski	ski sarcoma viral oncogene homolog (avian)
1428731_at	0.0838	0.00341	3.18661	-1.90911	0.141776	Usp54	ubiquitin specific peptidase 54
1440312_at	0.0838	0.00341	-3.18654	-1.90928	-0.179959	Elovl7	ELOVL family member 7, elongation of long chain fatty acids (yeast)
1429107_at	0.0838	0.00342	-3.18606	-1.9104	-0.125946	Ubr3	ubiquitin protein ligase E3 component n-recognin 3
1439830_at	0.0838	0.00342	3.18594	-1.91068	0.105576	Map3k5	mitogen-activated protein kinase kinase kinase 5
1432848_a_at	0.0842	0.00344	-3.18384	-1.91554	-0.112559	Frmd8	FERM domain containing 8
1428183_at	0.0842	0.00344	3.18365	-1.91596	0.165582	Ankrd23	ankyrin repeat domain 23
1421827_at	0.0843	0.00344	3.18302	-1.91744	0.126135	Dll4	delta-like 4 (Drosophila)
1438720_at	0.0844	0.00345	3.18229	-1.91913	0.140735	9330159F19Rik	RIKEN cDNA 9330159F19 gene
1428376_at	0.0844	0.00345	-3.18213	-1.91949	-0.188618	Cep83os	centrosomal protein 83, opposite strand
1443774_at	0.0845	0.00346	3.18158	-1.92077	0.131736	Zfat	zinc finger and AT hook domain containing
1456027_at	0.0845	0.00346	3.1812	-1.92166	0.172853	Rbm41	RNA binding motif protein 41
1452268_at	0.0845	0.00346	-3.18077	-1.92266	-0.176845	Fam76b	family with sequence similarity 76, member B
1428941_at	0.0845	0.00347	-3.1806	-1.92303	-0.199613	Zmym2	zinc finger, MYM-type 2
1440965_at	0.0845	0.00347	-3.18036	-1.92359	-0.172487	Pigl	phosphatidylinositol glycan anchor biosynthesis, class L
1453231_at	0.0845	0.00347	-3.18019	-1.92398	-0.143418	Cdkl1	cyclin-dependent kinase-like 1 (CDC2-related kinase)
1442554_s_at	0.0845	0.00347	3.17991	-1.92463	0.18074	Kalrn	kalirin, RhoGEF kinase
1417792_at	0.0848	0.00348	3.17844	-1.92804	0.128009	Zfp638	zinc finger protein 638
1435197_at	0.0848	0.00349	3.17841	-1.92811	0.168823	Pou3f3	POU domain, class 3, transcription factor 3
1429678_at	0.0848	0.00349	-3.17826	-1.92847	-0.137305	5730508B09Rik	RIKEN cDNA 5730508B09 gene
1450479_x_at	0.0848	0.00349	3.17805	-1.92894	0.11024	Ptpn12	protein tyrosine phosphatase, non-receptor type 12
1452980_at	0.0853	0.00351	-3.17543	-1.935	-0.160903	2810468N07Rik	RIKEN cDNA 2810468N07 gene
1431741_a_at	0.0853	0.00351	3.1751	-1.93576	0.137253	Pdzd9	PDZ domain containing 9
1435253_at	0.0853	0.00352	3.17495	-1.93613	0.249806	Rab11b	RAB11B, member RAS oncogene family
1455182_at	0.0855	0.00352	3.17403	-1.93825	0.254819	Kif1b	kinesin family member 1B
1457421_at	0.0855	0.00353	3.17358	-1.93928	0.201359	1700063D05Rik	RIKEN cDNA 1700063D05 gene
1427345_a_at	0.0856	0.00354	3.17279	-1.94111	0.491216	Sult1a1	sulfotransferase family 1A, phenol-preferring, member 1
1422191_at	0.0857	0.00354	-3.17193	-1.9431	-0.158314	Cd200r1	CD200 receptor 1
1455345_at	0.0857	0.00355	3.1716	-1.94388	0.130892	Jade2	jade family PHD finger 2
1419359_at	0.0857	0.00355	3.17156	-1.94395	0.164302	Hexim1	hexamethylene bis-acetamide inducible 1
1434321_at	0.0859	0.00356	-3.17031	-1.94686	-0.190688	Atrip	ATR interacting protein
1433554_at	0.0861	0.00357	-3.16933	-1.94913	-0.0999583	Ccz1	CCZ1 vacuolar protein trafficking and biogenesis associated
1442075_at	0.0862	0.00357	-3.16862	-1.95075	-0.191092	AI314604	expressed sequence AI314604
1435229_at	0.0863	0.00358	3.16783	-1.9526	0.158661	Gramd1b	GRAM domain containing 1B
1430385_a_at	0.0863	0.00359	-3.16732	-1.95377	-0.181289	Glb1l	galactosidase, beta 1-like
1439552_at	0.0863	0.00359	-3.1671	-1.95427	-0.124026	Trio	triple functional domain (PTPRF interacting)
1448301_s_at	0.0863	0.00359	-3.16703	-1.95443	-0.109753	Serpinb1a	serine (or cysteine) peptidase inhibitor, clade B, member 1a
1418590_at	0.0863	0.00359	-3.16684	-1.95488	-0.150977	Kpna6	karyopherin (importin) alpha 6
1429593_at	0.0863	0.00359	3.16634	-1.95603	0.158609	Slc38a2	solute carrier family 38, member 2
1426712_at	0.0863	0.0036	-3.16601	-1.9568	-0.146568	Slc6a15	solute carrier family 6 (neurotransmitter transporter), member 15
1450684_at	0.0863	0.0036	3.16598	-1.95687	0.148218	Gm5454///Etv1	predicted gene 5454///ets variant 1
1440097_at	0.0863	0.0036	3.16591	-1.95702	0.247513	Mirg	miRNA containing gene
1418345_at	0.0863	0.0036	-3.1658	-1.95728	-0.146789	Tnfsfm13///Tnfsf13///Tnfsf12	tumor necrosis factor (ligand) superfamily, membrane-bound member 13///tumor necrosis factor (ligand) superfamily, member 13///tumor necrosis factor (ligand) superfamily, member 12
1451264_at	0.0863	0.0036	3.16573	-1.95744	0.13052	Frmd6	FERM domain containing 6
1446769_at	0.0863	0.0036	-3.16534	-1.95833	-0.161824	Ttc39c	tetratricopeptide repeat domain 39C
1431105_a_at	0.0863	0.0036	3.16518	-1.95871	0.174545	Tmem33	transmembrane protein 33
1449388_at	0.0866	0.00362	3.16371	-1.96209	0.210692	Thbs4	thrombospondin 4
1452736_at	0.0867	0.00362	-3.16328	-1.96309	-0.124875	R3hcc1	R3H domain and coiled-coil containing 1
1424789_at	0.0868	0.00363	3.16264	-1.96457	0.153005	Zscan22	zinc finger and SCAN domain containing 22
1428210_s_at	0.0868	0.00363	3.1623	-1.96535	0.169275	Chuk	conserved helix-loop-helix ubiquitous kinase
1451555_at	0.0869	0.00364	-3.16176	-1.96661	-0.178674	Nln	neurolysin (metallopeptidase M3 family)
1440178_x_at	0.0869	0.00364	3.16129	-1.9677	0.171699	Zap70	zeta-chain (TCR) associated protein kinase
1448289_at	0.087	0.00365	-3.16054	-1.96941	-0.112809	Crmp1	collapsin response mediator protein 1
1420484_a_at	0.0871	0.00365	-3.15991	-1.97087	-0.161955	Vtn	vitronectin
1434218_at	0.0871	0.00366	3.15958	-1.97164	0.152886	Prr14l	proline rich 14-like
1418299_at	0.0871	0.00366	-3.15943	-1.97199	-0.212712	Dpysl4	dihydropyrimidinase-like 4
1450405_at	0.0871	0.00366	3.15933	-1.97223	0.131444	Mrpl19	mitochondrial ribosomal protein L19
1453372_at	0.0872	0.00366	3.15892	-1.97316	0.162731	Dnajc1	DnaJ heat shock protein family (Hsp40) member C1
1418447_at	0.0872	0.00367	-3.15861	-1.97389	-0.132879	Golga5	golgi autoantigen, golgin subfamily a, 5
1443506_at	0.0873	0.00367	-3.15786	-1.97562	-0.142607	Kctd2	potassium channel tetramerisation domain containing 2
1417013_at	0.0873	0.00367	3.1577	-1.97597	0.177077	Hspb8	heat shock protein 8
1419456_at	0.0874	0.00368	-3.15712	-1.97731	-0.150845	Dcxr	dicarbonyl L-xylulose reductase
1451301_at	0.0874	0.00368	3.15703	-1.97752	0.223068	Tmod2	tropomodulin 2
1429156_at	0.0877	0.0037	-3.15508	-1.98203	-0.178043	Cenpw	centromere protein W
1443564_at	0.0877	0.0037	3.15496	-1.98231	0.180086	Gm7969	predicted gene 7969
1448923_at	0.0879	0.00371	-3.15388	-1.98479	-0.126632	Prkra	protein kinase, interferon inducible double stranded RNA dependent activator
1436662_at	0.0879	0.00371	-3.15363	-1.98537	-0.308106	Sorcs1	sortilin-related VPS10 domain containing receptor 1
1417545_at	0.088	0.00372	3.153	-1.98683	0.139967	Trpv4	transient receptor potential cation channel, subfamily V, member 4
1451161_a_at	0.088	0.00372	-3.15254	-1.98788	-0.127954	Adgre1	adhesion G protein-coupled receptor E1
1427552_a_at	0.0883	0.00374	-3.15101	-1.99141	-0.180252	Gstz1	glutathione transferase zeta 1 (maleylacetoacetate isomerase)
1428192_at	0.0884	0.00374	3.15024	-1.99318	0.140766	Kbtbd7	kelch repeat and BTB (POZ) domain containing 7
1424573_at	0.0884	0.00375	3.15017	-1.99334	0.2277	Tmed5	transmembrane emp24 protein transport domain containing 5
1451990_at	0.0884	0.00375	3.15007	-1.99358	0.104558	Mapre2	microtubule-associated protein, RP/EB family, member 2
1455717_s_at	0.0884	0.00375	3.14988	-1.99401	0.159679	Daam2	dishevelled associated activator of morphogenesis 2
1434233_at	0.0884	0.00375	-3.14947	-1.99496	-0.102395	Vma21	VMA21 vacuolar H+-ATPase homolog (S. cerevisiae)
1423480_at	0.0887	0.00376	-3.14814	-1.99804	-0.191313	Nol11	nucleolar protein 11
1444082_at	0.089	0.00378	-3.14649	-2.00183	-0.208463	A730017C20Rik	RIKEN cDNA A730017C20 gene
1457087_at	0.089	0.00378	3.14634	-2.00218	0.161254	Srrm3	serine/arginine repetitive matrix 3
1460440_at	0.089	0.00379	-3.14569	-2.00368	-0.135452	Adgrl3	adhesion G protein-coupled receptor L3
1429240_at	0.089	0.00379	-3.14555	-2.00399	-0.124301	Stard4	StAR-related lipid transfer (START) domain containing 4
1426840_at	0.089	0.00379	3.14516	-2.0049	0.126673	Ythdf3	YTH domain family 3
1433833_at	0.089	0.00379	3.14513	-2.00496	0.139211	Fndc3b	fibronectin type III domain containing 3B
1448347_a_at	0.089	0.0038	3.14484	-2.00563	0.129447	Caprin1	cell cycle associated protein 1
1427925_at	0.0891	0.0038	-3.14458	-2.00623	-0.174861	Stx17	syntaxin 17
1423668_at	0.0892	0.00381	3.14369	-2.00828	0.208111	Zdhhc14	zinc finger, DHHC domain containing 14
1437115_at	0.0892	0.00381	3.1436	-2.0085	0.171243	Phrf1	PHD and ring finger domains 1
1452624_at	0.0892	0.00381	3.14331	-2.00915	0.132613	Lrrtm1	leucine rich repeat transmembrane neuronal 1
1423777_at	0.0893	0.00382	-3.1425	-2.01103	-0.115274	Usp20	ubiquitin specific peptidase 20
1458079_at	0.0893	0.00382	3.14244	-2.01115	0.170191	Usp40	ubiquitin specific peptidase 40
1428558_at	0.0893	0.00382	-3.14225	-2.0116	-0.156282	Osgepl1	O-sialoglycoprotein endopeptidase-like 1
1426380_at	0.0893	0.00383	-3.14178	-2.01268	-0.106311	Eif4b	eukaryotic translation initiation factor 4B
1427373_at	0.0893	0.00383	-3.14174	-2.01277	-0.215756	Amigo1	adhesion molecule with Ig like domain 1
1438635_x_at	0.0893	0.00383	-3.14136	-2.01364	-0.206431	Fndc10	fibronectin type III domain containing 10
1429106_at	0.0893	0.00383	3.14127	-2.01387	0.0969015	4921509J17Rik///Hspa4l	RIKEN cDNA 4921509J17 gene///heat shock protein 4 like
1434307_at	0.0893	0.00383	3.1409	-2.0147	0.1331	Tmem64	transmembrane protein 64
1416248_at	0.0893	0.00384	3.14072	-2.01511	0.102863	Nadk	NAD kinase
1455988_a_at	0.0893	0.00384	3.14041	-2.01584	0.109512	Cct6a	chaperonin containing Tcp1, subunit 6a (zeta)
1449732_at	0.0893	0.00384	-3.14027	-2.01616	-0.304071	Zscan21	zinc finger and SCAN domain containing 21
1437944_at	0.0896	0.00386	-3.13877	-2.01961	-0.194645	Shc2	SHC (Src homology 2 domain containing) transforming protein 2
1450676_at	0.0899	0.00387	-3.1374	-2.02277	-0.132108	Tceb3	transcription elongation factor B (SIII), polypeptide 3
1458352_at	0.0899	0.00387	-3.13713	-2.02338	-0.148204	Lcorl	ligand dependent nuclear receptor corepressor-like
1452418_at	0.0899	0.00388	3.13645	-2.02496	0.223248	Gm20186	predicted gene, 20186
1427918_a_at	0.0899	0.00388	-3.13641	-2.02503	-0.115087	Rhoq	ras homolog family member Q
1434612_s_at	0.0899	0.00388	3.13626	-2.02538	0.118258	Sbno1	strawberry notch homolog 1 (Drosophila)
1449093_at	0.0899	0.00388	-3.13607	-2.02582	-0.136857	Ctf1	cardiotrophin 1
1455663_at	0.0901	0.00389	-3.13524	-2.02773	-0.162876	Olfml1	olfactomedin-like 1
1451355_at	0.0901	0.00389	3.13492	-2.02846	0.252572	Acer2	alkaline ceramidase 2
1428180_at	0.0902	0.0039	-3.13413	-2.03028	-0.144076	Kxd1///Uba52	KxDL motif containing 1///ubiquitin A-52 residue ribosomal protein fusion product 1
1455769_at	0.0903	0.00391	-3.13335	-2.03208	-0.159933	2610019N06Rik	RIKEN cDNA 2610019N06 gene
1421033_a_at	0.0903	0.00391	-3.13323	-2.03235	-0.135284	Tcerg1	transcription elongation regulator 1 (CA150)
1428778_at	0.0904	0.00392	3.13274	-2.03348	0.205876	Sfi1	Sfi1 homolog, spindle assembly associated (yeast)
1426669_at	0.0906	0.00393	-3.13119	-2.03704	-0.121262	Cpped1	calcineurin-like phosphoesterase domain containing 1
1450643_s_at	0.0906	0.00393	-3.13102	-2.03744	-0.128746	Acsl1	acyl-CoA synthetase long-chain family member 1
1453162_at	0.0906	0.00393	3.13093	-2.03764	0.156952	Utp11l	UTP11-like, U3 small nucleolar ribonucleoprotein, (yeast)
1460672_at	0.0906	0.00394	-3.13069	-2.0382	-0.242081	2410002F23Rik	RIKEN cDNA 2410002F23 gene
1422354_at	0.0906	0.00394	3.13033	-2.03902	0.148174	Olfr544	olfactory receptor 544
1426862_at	0.0906	0.00394	3.13022	-2.03927	0.104088	Aftph	aftiphilin
1438431_at	0.0906	0.00394	-3.13	-2.03979	-0.167527	Abcd2	ATP-binding cassette, sub-family D (ALD), member 2
1456634_at	0.0906	0.00394	-3.12998	-2.03984	-0.281197	Soga1	suppressor of glucose, autophagy associated 1
1437429_at	0.0906	0.00394	-3.12993	-2.03994	-0.17735	Adamtsl1	ADAMTS-like 1
1416200_at	0.0908	0.00395	-3.12895	-2.0422	-0.148313	Il33	interleukin 33
1426905_a_at	0.0908	0.00395	-3.12877	-2.04261	-0.123078	Dnajc10	DnaJ heat shock protein family (Hsp40) member C10
1424691_at	0.0908	0.00396	-3.12843	-2.04339	-0.160871	Cacfd1	calcium channel flower domain containing 1
1455445_at	0.0908	0.00396	-3.1284	-2.04346	-0.2045	Cbln3	cerebellin 3 precursor protein
1438429_at	0.0908	0.00396	3.12839	-2.04348	0.16053	2610319H10Rik	RIKEN cDNA 2610319H10 gene
1448910_at	0.0911	0.00398	-3.12671	-2.04735	-0.210133	Pecr	peroxisomal trans-2-enoyl-CoA reductase
1428375_at	0.0911	0.00398	-3.12658	-2.04764	-0.235568	Cep83os	centrosomal protein 83, opposite strand
1459927_at	0.0912	0.00398	-3.12587	-2.04927	-0.172782	Mir425	microRNA 425
1428394_at	0.0914	0.00399	3.12484	-2.05163	0.171145	Lrrc8a///Phyhd1	leucine rich repeat containing 8A///phytanoyl-CoA dioxygenase domain containing 1
1449041_a_at	0.0914	0.004	3.1247	-2.05196	0.157453	Trip6	thyroid hormone receptor interactor 6
1435513_at	0.0916	0.00401	-3.12363	-2.05442	-0.120388	Htr2c	5-hydroxytryptamine (serotonin) receptor 2C
1424734_at	0.0919	0.00402	3.12216	-2.05779	0.1269	Rasgrf1	RAS protein-specific guanine nucleotide-releasing factor 1
1421934_at	0.092	0.00403	3.12155	-2.05918	0.135958	Cbx5	chromobox 5
1439038_at	0.092	0.00403	-3.12111	-2.06021	-0.164641	Khnyn	KH and NYN domain containing
1418901_at	0.0921	0.00404	3.12085	-2.0608	0.129843	Cebpb	CCAAT/enhancer binding protein (C/EBP), beta
1439826_at	0.0921	0.00404	-3.12046	-2.06169	-0.141902	Hspa14	heat shock protein 14
1456854_at	0.0921	0.00404	3.12012	-2.06246	0.18344	Neurl1a	neuralized E3 ubiquitin protein ligase 1A
1448310_at	0.0923	0.00405	-3.11915	-2.06469	-0.16037	Ick	intestinal cell kinase
1457323_at	0.0923	0.00405	3.11905	-2.06492	0.258499	Smco3	single-pass membrane protein with coiled-coil domains 3
1428261_at	0.0923	0.00405	3.11895	-2.06516	0.205497	Ccdc134	coiled-coil domain containing 134
1457043_at	0.0923	0.00406	-3.11872	-2.06569	-0.107126	B3glct	beta-3-glucosyltransferase
1451327_a_at	0.0923	0.00406	-3.11839	-2.06645	-0.138234	Tmed1	transmembrane emp24 domain containing 1
1423849_a_at	0.0925	0.00407	3.11754	-2.06838	0.11476	Clk3	CDC-like kinase 3
1434996_at	0.0926	0.00408	-3.11676	-2.07018	-0.168956	Slc25a16	solute carrier family 25 (mitochondrial carrier, Graves disease autoantigen), member 16
1426618_a_at	0.0929	0.00409	-3.11523	-2.0737	-0.114603	Pomgnt1	protein O-linked mannose beta 1,2-N-acetylglucosaminyltransferase
1423523_at	0.093	0.0041	3.11457	-2.07519	0.190876	Aass	aminoadipate-semialdehyde synthase
1455721_at	0.093	0.0041	3.11456	-2.07523	0.154797	Gspt2	G1 to S phase transition 2
1423069_at	0.0931	0.00411	-3.11386	-2.07682	-0.0991171	Dpm1///Adnp	dolichol-phosphate (beta-D) mannosyltransferase 1///activity-dependent neuroprotective protein
1459019_at	0.0931	0.00411	-3.11353	-2.0776	-0.162142	Sprn	shadow of prion protein
1441055_at	0.0933	0.00412	3.11276	-2.07936	0.166983	Palm2	paralemmin 2
1452159_at	0.0933	0.00412	-3.11224	-2.08055	-0.142543	Apmap	adipocyte plasma membrane associated protein
1450808_at	0.0933	0.00413	-3.11202	-2.08105	-0.121992	Fpr1	formyl peptide receptor 1
1452734_at	0.0934	0.00413	-3.11149	-2.08226	-0.116361	Rnaset2a///Rnaset2b	ribonuclease T2A///ribonuclease T2B
1428874_at	0.0934	0.00414	3.11119	-2.08295	0.134926	Fam96b	family with sequence similarity 96, member B
1417146_at	0.0935	0.00414	-3.11085	-2.08373	-0.202661	Mri1	methylthioribose-1-phosphate isomerase 1
1427011_a_at	0.0935	0.00414	-3.11048	-2.08459	-0.0936757	Lancl1	LanC (bacterial lantibiotic synthetase component C)-like 1
1447726_at	0.0935	0.00414	-3.11042	-2.08472	-0.190062	Ripply2	ripply transcriptional repressor 2
1428245_at	0.0935	0.00415	-3.11025	-2.08511	-0.100878	G6pc3	glucose 6 phosphatase, catalytic, 3
1448620_at	0.0935	0.00415	3.10962	-2.08655	0.197534	Fcgr3	Fc receptor, IgG, low affinity III
1451028_at	0.0935	0.00415	3.10955	-2.0867	0.124927	Baiap2	brain-specific angiogenesis inhibitor 1-associated protein 2
1432056_at	0.0935	0.00415	-3.10944	-2.08697	-0.123636	Cpvl	carboxypeptidase, vitellogenic-like
1437205_at	0.0936	0.00416	-3.10879	-2.08845	-0.14745	Tcf25	transcription factor 25 (basic helix-loop-helix)
1451529_at	0.0936	0.00416	-3.1086	-2.0889	-0.0976779	Sgtb	small glutamine-rich tetratricopeptide repeat (TPR)-containing, beta
1434514_at	0.0937	0.00417	3.10832	-2.08953	0.152346	Rbm15	RNA binding motif protein 15
1429264_at	0.0937	0.00417	-3.10778	-2.09076	-0.130132	Fam120aos	family with sequence similarity 120A, opposite strand
1434886_at	0.0937	0.00417	3.1077	-2.09094	0.160507	Opa3	optic atrophy 3
1436427_at	0.0937	0.00417	3.10747	-2.09148	0.193866	Prpf4b	pre-mRNA processing factor 4B
1434562_at	0.0939	0.00419	3.1061	-2.09462	0.196083	Mfap3	microfibrillar-associated protein 3
1431367_at	0.0939	0.00419	-3.10593	-2.09501	-0.168338	2021-03-01	membrane-associated ring finger (C3HC4) 1
1435549_at	0.0939	0.00419	-3.10593	-2.09501	-0.217169	Trpm4	transient receptor potential cation channel, subfamily M, member 4
1418039_at	0.094	0.0042	-3.1054	-2.0962	-0.13552	Rabl3	RAB, member RAS oncogene family-like 3
1456199_x_at	0.094	0.0042	3.10511	-2.09687	0.131676	Ranbp9	RAN binding protein 9
1436116_x_at	0.0941	0.0042	3.10479	-2.09761	0.16175	Appl1	adaptor protein, phosphotyrosine interaction, PH domain and leucine zipper containing 1
1436833_x_at	0.0941	0.0042	-3.10461	-2.09803	-0.1324	Ttll1	tubulin tyrosine ligase-like 1
1438442_at	0.0942	0.00421	3.10366	-2.1002	0.188692	Sike1	suppressor of IKBKE 1
1437184_at	0.0943	0.00422	-3.1034	-2.10079	-0.175457	Guf1	GUF1 homolog, GTPase
1438046_at	0.0945	0.00423	-3.1021	-2.10376	-0.201475	AU019823	expressed sequence AU019823
1416621_at	0.0947	0.00424	-3.10128	-2.10564	-0.0927555	Llgl1	lethal giant larvae homolog 1 (Drosophila)
1452279_at	0.0949	0.00425	3.10008	-2.10839	0.201929	Cfp	complement factor properdin
1452160_at	0.095	0.00426	3.09956	-2.10958	0.141319	Tiparp	TCDD-inducible poly(ADP-ribose) polymerase
1417371_at	0.0952	0.00427	3.09864	-2.11167	0.138328	Peli1	pellino 1
1422159_at	0.0952	0.00427	3.09822	-2.11264	0.159784	Ppef2	protein phosphatase, EF hand calcium-binding domain 2
1429220_at	0.0952	0.00428	-3.09788	-2.11343	-0.256423	Dph7	diphthamine biosynethesis 7
1448560_at	0.0952	0.00428	-3.09757	-2.11414	-0.210293	Bid	BH3 interacting domain death agonist
1447790_at	0.0953	0.00429	3.09684	-2.1158	0.153682	Erdr1	erythroid differentiation regulator 1
1440530_at	0.0953	0.00429	3.09675	-2.11601	0.210625	AU019752	expressed sequence AU019752
1451194_at	0.0953	0.00429	-3.09651	-2.11656	-0.158449	Aldob	aldolase B, fructose-bisphosphate
1441515_at	0.0953	0.00429	-3.09627	-2.11711	-0.161573	Fam228b	family with sequence similarity 228, member B
1450871_a_at	0.0953	0.0043	3.09614	-2.1174	0.14795	Bcat1	branched chain aminotransferase 1, cytosolic
1422616_s_at	0.0953	0.0043	-3.09614	-2.1174	-0.209773	Wdr54	WD repeat domain 54
1451338_at	0.0953	0.0043	-3.096	-2.11773	-0.125128	Nisch	nischarin
1435437_at	0.0956	0.00432	3.09436	-2.12147	0.0980109	Setd7	SET domain containing (lysine methyltransferase) 7
1455723_at	0.0956	0.00432	3.09409	-2.12209	0.242196	D1Ertd448e///Imp4	DNA segment, Chr 1, ERATO Doi 448, expressed///IMP4, U3 small nucleolar ribonucleoprotein
1457671_at	0.0956	0.00432	3.09399	-2.12232	0.134244	Homer2	homer scaffolding protein 2
1429843_at	0.0956	0.00433	3.09345	-2.12355	0.128172	Grrp1	glycine/arginine rich protein 1
1435914_at	0.0956	0.00433	-3.09345	-2.12355	-0.174838	Ncor1	nuclear receptor co-repressor 1
1437300_at	0.0957	0.00433	3.09307	-2.12443	0.117147	Mef2d	myocyte enhancer factor 2D
1445765_at	0.0958	0.00434	3.09241	-2.12594	0.124387	9430011C21Rik	RIKEN cDNA 9430011C21 gene
1419470_at	0.0958	0.00434	-3.09232	-2.12613	-0.166642	Gnb4	guanine nucleotide binding protein (G protein), beta 4
1433850_at	0.0958	0.00434	3.09201	-2.12683	0.131695	Ppp4r2	protein phosphatase 4, regulatory subunit 2
1416497_at	0.0959	0.00435	3.09124	-2.12861	0.181015	Pdia4	protein disulfide isomerase associated 4
1447852_x_at	0.096	0.00436	3.09064	-2.12996	0.14936	Rilpl1	Rab interacting lysosomal protein-like 1
1451489_at	0.096	0.00436	-3.09064	-2.12997	-0.185151	Slc25a35	solute carrier family 25, member 35
1434585_at	0.0961	0.00436	-3.09	-2.13143	-0.162674	Gm2808///Tulp4	predicted gene 2808///tubby like protein 4
1428150_at	0.0961	0.00437	-3.0897	-2.13211	-0.232873	Coro7	coronin 7
1433826_at	0.0971	0.00441	-3.08558	-2.14153	-0.131116	Tspyl3	TSPY-like 3
1449629_s_at	0.0971	0.00442	-3.08525	-2.14229	-0.118942	Snrpd3	small nuclear ribonucleoprotein D3
1429009_at	0.0971	0.00442	-3.08519	-2.14241	-0.149606	Snrnp70	small nuclear ribonucleoprotein 70 (U1)
1424803_at	0.0973	0.00443	-3.08389	-2.1454	-0.164245	Mios	missing oocyte, meiosis regulator, homolog (Drosophila)
1433626_at	0.0973	0.00443	-3.0838	-2.14559	-0.154791	Plscr4	phospholipid scramblase 4
1425454_a_at	0.0974	0.00444	3.08319	-2.14698	0.142906	Il12a	interleukin 12a
1435970_at	0.0977	0.00445	3.08192	-2.14988	0.118172	Nlk	nemo like kinase
1435999_at	0.0977	0.00446	3.08102	-2.15194	0.155833	Spink8	serine peptidase inhibitor, Kazal type 8
1456532_at	0.0977	0.00446	3.08092	-2.15217	0.168875	Pdgfd	platelet-derived growth factor, D polypeptide
1432136_s_at	0.0977	0.00446	-3.08089	-2.15223	-0.12833	Zdhhc4	zinc finger, DHHC domain containing 4
1450468_at	0.0978	0.00447	-3.08056	-2.15298	-0.230516	Myoc	myocilin
1454798_at	0.0978	0.00447	3.08006	-2.15413	0.214113	Rbm15b	RNA binding motif protein 15B
1434290_at	0.0978	0.00447	-3.08004	-2.15418	-0.187971	Gtdc1	glycosyltransferase-like domain containing 1
1434035_at	0.0978	0.00448	3.07981	-2.15469	0.107455	Dnajb6	DnaJ heat shock protein family (Hsp40) member B6
1444291_at	0.0979	0.00448	-3.07951	-2.15537	-0.131783	Lysmd4	LysM, putative peptidoglycan-binding, domain containing 4
[truncated: 37,904 more rows]
