# Supplementary material for: Relationship between circadian genes and memory impairment caused by sleep deprivation
Source: PeerJ. 2022 Mar 21;10:e13165. doi: 10.7717/peerj.13165 (PMC8944342; doi:10.7717/peerj.13165)
Supplement: Supplemental Information 2 [file peerj-10-13165-s002.xlsx]

## Sheet: GSE33302
Gene Set	Description	Size	Leading Edge Number	ES	NES	P Value	FDR
mmu05322	Systemic lupus erythematosus	65	28	0.50613	2.2721	0	0
mmu04720	Long-term potentiation	62	37	-0.514	-2.1653	0	0.0010929
mmu04360	Axon guidance	174	85	-0.42057	-2.1129	0	0.0021857
mmu05032	Morphine addiction	84	39	-0.45588	-2.0246	0	0.0052457
mmu05033	Nicotine addiction	38	22	-0.54041	-2.0563	0	0.0054643
mmu04216	Ferroptosis	38	19	-0.54886	-2.031	0	0.0062839
mmu00900	Terpenoid backbone biosynthesis	22	13	-0.58907	-1.9734	0.0053004	0.0092893
mmu04723	Retrograde endocannabinoid signaling	135	50	-0.39546	-1.8966	0	0.0153
mmu03050	Proteasome	43	27	-0.49037	-1.9092	0	0.016081
mmu05310	Asthma	23	11	0.56402	1.9516	0	0.020359
mmu04540	Gap junction	78	33	-0.41799	-1.8252	0.0033445	0.031207
mmu04114	Oocyte meiosis	107	49	-0.39046	-1.8061	0	0.034097
mmu05320	Autoimmune thyroid disease	45	30	0.42737	1.7558	0.0022727	0.11753
mmu04672	Intestinal immune network for IgA production	40	14	0.37735	1.5306	0.018349	0.223
mmu05140	Leishmaniasis	65	17	0.36786	1.646	0	0.2259
mmu05034	Alcoholism	120	33	0.30686	1.5418	0.0052219	0.22756
mmu03450	Non-homologous end-joining	13	6	0.52473	1.5537	0.060538	0.23424
mmu05202	Transcriptional misregulation in cancer	164	42	0.26431	1.4108	0.011527	0.24918
mmu05142	Chagas disease (American trypanosomiasis)	100	29	0.29539	1.4166	0.017544	0.25228
mmu05321	Inflammatory bowel disease (IBD)	54	20	0.32995	1.4208	0.035047	0.25689

## Sheet: GSE9442
Gene Set	Description	Size	Leading Edge Number	ES	NES	P Value	FDR
mmu04141	Protein processing in endoplasmic reticulum	156	51	0.48107	2.2679	0	0.0010872
mmu03420	Nucleotide excision repair	43	27	-0.50547	-1.8487	0.0037736	0.041909
mmu00531	Glycosaminoglycan degradation	20	11	-0.61204	-1.8816	0	0.042987
mmu03060	Protein export	22	10	0.62379	1.9386	0	0.046749
mmu05202	Transcriptional misregulation in cancer	164	36	0.38893	1.8529	0.002193	0.047401
mmu05134	Legionellosis	54	10	0.47745	1.8613	0.0042105	0.052457
mmu04213	Longevity regulating pathway	62	19	0.44921	1.8101	0.0021598	0.057621
mmu04612	Antigen processing and presentation	60	14	0.47012	1.8659	0	0.066319
mmu00052	Galactose metabolism	30	17	-0.55905	-1.892	0	0.070259
mmu05020	Prion diseases	33	5	0.50009	1.7517	0.0084567	0.070667
mmu04068	FoxO signaling pathway	131	32	0.3831	1.7682	0	0.071444
mmu00380	Tryptophan metabolism	41	18	-0.47737	-1.7368	0.0019084	0.071646
mmu00500	Starch and sucrose metabolism	28	16	-0.51304	-1.7397	0.0057582	0.083202
mmu00010	Glycolysis / Gluconeogenesis	64	26	-0.42943	-1.7012	0.0037313	0.087031
mmu00100	Steroid biosynthesis	19	7	-0.55405	-1.6626	0.017013	0.088933
mmu00515	Mannose type O-glycan biosynthesis	20	12	-0.53824	-1.6708	0.015656	0.090597
mmu01523	Antifolate resistance	30	14	-0.49393	-1.674	0.0074349	0.09938
mmu00980	Metabolism of xenobiotics by cytochrome P450	51	18	-0.42473	-1.6321	0.011494	0.09938
mmu05215	Prostate cancer	97	23	0.38913	1.6947	0	0.10183
mmu04928	Parathyroid hormone synthesis, secretion and action	102	23	0.36671	1.6209	0.0066519	0.12068
