# Supplementary material for: Relationship between circadian genes and memory impairment caused by sleep deprivation
Source: PeerJ. 2022 Mar 21;10:e13165. doi: 10.7717/peerj.13165 (PMC8944342; doi:10.7717/peerj.13165)
Supplement: Supplemental Information 3 [file peerj-10-13165-s003.xlsx]

## Sheet: Sheet1
Gene Symbol	Description	Category	Gifts	GC Id	Relevance score	GeneCards Link
PER2	Period Circadian Regulator 2	Protein Coding	43	GC02M238244	85.9102	https://www.genecards.org/cgi-bin/carddisp.pl?gene=PER2
PER3	Period Circadian Regulator 3	Protein Coding	42	GC01P007785	72.1875	https://www.genecards.org/cgi-bin/carddisp.pl?gene=PER3
CLOCK	Clock Circadian Regulator	Protein Coding	43	GC04M055427	63.8066	https://www.genecards.org/cgi-bin/carddisp.pl?gene=CLOCK
PER1	Period Circadian Regulator 1	Protein Coding	41	GC17M009458	58.2818	https://www.genecards.org/cgi-bin/carddisp.pl?gene=PER1
CRY1	Cryptochrome Circadian Regulator 1	Protein Coding	43	GC12M106991	51.7804	https://www.genecards.org/cgi-bin/carddisp.pl?gene=CRY1
CRY2	Cryptochrome Circadian Regulator 2	Protein Coding	41	GC11P046183	48.2469	https://www.genecards.org/cgi-bin/carddisp.pl?gene=CRY2
ARNTL	Aryl Hydrocarbon Receptor Nuclear Translocator Like	Protein Coding	42	GC11P013276	47.7208	https://www.genecards.org/cgi-bin/carddisp.pl?gene=ARNTL
CSNK1D	Casein Kinase 1 Delta	Protein Coding	49	GC17M082239	38.8494	https://www.genecards.org/cgi-bin/carddisp.pl?gene=CSNK1D
TIMELESS	Timeless Circadian Regulator	Protein Coding	38	GC12M056416	35.183	https://www.genecards.org/cgi-bin/carddisp.pl?gene=TIMELESS
NPAS2	Neuronal PAS Domain Protein 2	Protein Coding	41	GC02P100820	30.7587	https://www.genecards.org/cgi-bin/carddisp.pl?gene=NPAS2
NR1D1	Nuclear Receptor Subfamily 1 Group D Member 1	Protein Coding	47	GC17M040092	28.3117	https://www.genecards.org/cgi-bin/carddisp.pl?gene=NR1D1
SCN5A	Sodium Voltage-Gated Channel Alpha Subunit 5	Protein Coding	49	GC03M038549	27.2468	https://www.genecards.org/cgi-bin/carddisp.pl?gene=SCN5A
CSNK1E	Casein Kinase 1 Epsilon	Protein Coding	46	GC22M051140	26.452	https://www.genecards.org/cgi-bin/carddisp.pl?gene=CSNK1E
ARNTL2	Aryl Hydrocarbon Receptor Nuclear Translocator Like 2	Protein Coding	38	GC12P027332	24.1835	https://www.genecards.org/cgi-bin/carddisp.pl?gene=ARNTL2
BHLHE41	Basic Helix-Loop-Helix Family Member E41	Protein Coding	41	GC12M026120	21.9125	https://www.genecards.org/cgi-bin/carddisp.pl?gene=BHLHE41
RORA	RAR Related Orphan Receptor A	Protein Coding	48	GC15M060488	21.6723	https://www.genecards.org/cgi-bin/carddisp.pl?gene=RORA
CIART	Circadian Associated Repressor Of Transcription	Protein Coding	27	GC01P150282	20.9549	https://www.genecards.org/cgi-bin/carddisp.pl?gene=CIART
AANAT	Aralkylamine N-Acetyltransferase	Protein Coding	38	GC17P076453	20.6275	https://www.genecards.org/cgi-bin/carddisp.pl?gene=AANAT
NPPA	Natriuretic Peptide A	Protein Coding	45	GC01M011846	19.7861	https://www.genecards.org/cgi-bin/carddisp.pl?gene=NPPA
BHLHE40	Basic Helix-Loop-Helix Family Member E40	Protein Coding	41	GC03P004980	19.2439	https://www.genecards.org/cgi-bin/carddisp.pl?gene=BHLHE40
DBP	D-Box Binding PAR BZIP Transcription Factor	Protein Coding	37	GC19M048630	17.3685	https://www.genecards.org/cgi-bin/carddisp.pl?gene=DBP
NR1D2	Nuclear Receptor Subfamily 1 Group D Member 2	Protein Coding	42	GC03P023945	16.8154	https://www.genecards.org/cgi-bin/carddisp.pl?gene=NR1D2
FBXL3	F-Box And Leucine Rich Repeat Protein 3	Protein Coding	39	GC13M076992	16.0594	https://www.genecards.org/cgi-bin/carddisp.pl?gene=FBXL3
OPN4	Opsin 4	Protein Coding	41	GC10P086723	15.371	https://www.genecards.org/cgi-bin/carddisp.pl?gene=OPN4
RYR2	Ryanodine Receptor 2	Protein Coding	47	GC01P237042	14.4738	https://www.genecards.org/cgi-bin/carddisp.pl?gene=RYR2
KCNQ1	Potassium Voltage-Gated Channel Subfamily Q Member 1	Protein Coding	49	GC11P002444	14.4231	https://www.genecards.org/cgi-bin/carddisp.pl?gene=KCNQ1
MTNR1A	Melatonin Receptor 1A	Protein Coding	44	GC04M186533	14.412	https://www.genecards.org/cgi-bin/carddisp.pl?gene=MTNR1A
RORB	RAR Related Orphan Receptor B	Protein Coding	46	GC09P074497	13.6968	https://www.genecards.org/cgi-bin/carddisp.pl?gene=RORB
PRL	Prolactin	Protein Coding	42	GC06M022287	13.694	https://www.genecards.org/cgi-bin/carddisp.pl?gene=PRL
PRKAG2	Protein Kinase AMP-Activated Non-Catalytic Subunit Gamma 2	Protein Coding	49	GC07M151556	13.4567	https://www.genecards.org/cgi-bin/carddisp.pl?gene=PRKAG2
DSPS	Delayed Sleep Phase Syndrome, Susceptibility To	Genetic Locus	1	GC17U902517	13.1716	https://www.genecards.org/cgi-bin/carddisp.pl?gene=DSPS
RORC	RAR Related Orphan Receptor C	Protein Coding	44	GC01M151806	13.1482	https://www.genecards.org/cgi-bin/carddisp.pl?gene=RORC
SERPINE1	Serpin Family E Member 1	Protein Coding	49	GC07P101127	13.1436	https://www.genecards.org/cgi-bin/carddisp.pl?gene=SERPINE1
NFIL3	Nuclear Factor, Interleukin 3 Regulated	Protein Coding	40	GC09M091409	12.9598	https://www.genecards.org/cgi-bin/carddisp.pl?gene=NFIL3
GSK3B	Glycogen Synthase Kinase 3 Beta	Protein Coding	49	GC03M119821	12.7759	https://www.genecards.org/cgi-bin/carddisp.pl?gene=GSK3B
NOCT	Nocturnin	Protein Coding	29	GC04P139016	12.6043	https://www.genecards.org/cgi-bin/carddisp.pl?gene=NOCT
LEP	Leptin	Protein Coding	46	GC07P128241	12.5486	https://www.genecards.org/cgi-bin/carddisp.pl?gene=LEP
NPY	Neuropeptide Y	Protein Coding	45	GC07P024290	12.5099	https://www.genecards.org/cgi-bin/carddisp.pl?gene=NPY
CACNA1C	Calcium Voltage-Gated Channel Subunit Alpha1 C	Protein Coding	48	GC12P001970	12.2834	https://www.genecards.org/cgi-bin/carddisp.pl?gene=CACNA1C
CREB1	CAMP Responsive Element Binding Protein 1	Protein Coding	48	GC02P207529	12.2555	https://www.genecards.org/cgi-bin/carddisp.pl?gene=CREB1
PASD1	PAS Domain Containing Repressor 1	Protein Coding	30	GC0XP151563	11.1572	https://www.genecards.org/cgi-bin/carddisp.pl?gene=PASD1
BTRC	Beta-Transducin Repeat Containing E3 Ubiquitin Protein Ligase	Protein Coding	46	GC10P101354	10.6135	https://www.genecards.org/cgi-bin/carddisp.pl?gene=BTRC
MTNR1B	Melatonin Receptor 1B	Protein Coding	46	GC11P092969	10.5295	https://www.genecards.org/cgi-bin/carddisp.pl?gene=MTNR1B
CIPC	CLOCK Interacting Pacemaker	Protein Coding	29	GC14P077099	10.524	https://www.genecards.org/cgi-bin/carddisp.pl?gene=CIPC
PROK2	Prokineticin 2	Protein Coding	43	GC03M071771	10.5156	https://www.genecards.org/cgi-bin/carddisp.pl?gene=PROK2
KCNJ2	Potassium Inwardly Rectifying Channel Subfamily J Member 2	Protein Coding	48	GC17P070168	10.2606	https://www.genecards.org/cgi-bin/carddisp.pl?gene=KCNJ2
ACE	Angiotensin I Converting Enzyme	Protein Coding	49	GC17P063477	9.8685	https://www.genecards.org/cgi-bin/carddisp.pl?gene=ACE
CRH	Corticotropin Releasing Hormone	Protein Coding	44	GC08M066176	9.84281	https://www.genecards.org/cgi-bin/carddisp.pl?gene=CRH
NMS	Neuromedin S	Protein Coding	34	GC02P100453	9.81493	https://www.genecards.org/cgi-bin/carddisp.pl?gene=NMS
INS	Insulin	Protein Coding	46	GC11M002159	9.81413	https://www.genecards.org/cgi-bin/carddisp.pl?gene=INS
RAI1	Retinoic Acid Induced 1	Protein Coding	39	GC17P017682	9.7351	https://www.genecards.org/cgi-bin/carddisp.pl?gene=RAI1
SIRT1	Sirtuin 1	Protein Coding	48	GC10P067884	9.45635	https://www.genecards.org/cgi-bin/carddisp.pl?gene=SIRT1
HCRT	Hypocretin Neuropeptide Precursor	Protein Coding	40	GC17M042185	9.40814	https://www.genecards.org/cgi-bin/carddisp.pl?gene=HCRT
IL6	Interleukin 6	Protein Coding	48	GC07P022725	9.28557	https://www.genecards.org/cgi-bin/carddisp.pl?gene=IL6
REN	Renin	Protein Coding	46	GC01M204154	9.22752	https://www.genecards.org/cgi-bin/carddisp.pl?gene=REN
EMD	Emerin	Protein Coding	44	GC0XP154379	9.20437	https://www.genecards.org/cgi-bin/carddisp.pl?gene=EMD
PPARG	Peroxisome Proliferator Activated Receptor Gamma	Protein Coding	51	GC03P012287	9.12041	https://www.genecards.org/cgi-bin/carddisp.pl?gene=PPARG
CHEK2	Checkpoint Kinase 2	Protein Coding	52	GC22M028687	9.10228	https://www.genecards.org/cgi-bin/carddisp.pl?gene=CHEK2
NKX2-5	NK2 Homeobox 5	Protein Coding	44	GC05M173232	8.8986	https://www.genecards.org/cgi-bin/carddisp.pl?gene=NKX2-5
KCNJ5	Potassium Inwardly Rectifying Channel Subfamily J Member 5	Protein Coding	46	GC11P128891	8.78965	https://www.genecards.org/cgi-bin/carddisp.pl?gene=KCNJ5
SLC6A4	Solute Carrier Family 6 Member 4	Protein Coding	47	GC17M030194	8.70686	https://www.genecards.org/cgi-bin/carddisp.pl?gene=SLC6A4
ADCY10	Adenylate Cyclase 10	Protein Coding	44	GC01M167809	8.69562	https://www.genecards.org/cgi-bin/carddisp.pl?gene=ADCY10
GHRL	Ghrelin And Obestatin Prepropeptide	Protein Coding	42	GC03M010285	8.62476	https://www.genecards.org/cgi-bin/carddisp.pl?gene=GHRL
TP53	Tumor Protein P53	Protein Coding	52	GC17M007661	8.48697	https://www.genecards.org/cgi-bin/carddisp.pl?gene=TP53
TNF	Tumor Necrosis Factor	Protein Coding	49	GC06P061170	8.30699	https://www.genecards.org/cgi-bin/carddisp.pl?gene=TNF
CREM	CAMP Responsive Element Modulator	Protein Coding	41	GC10P035126	8.28246	https://www.genecards.org/cgi-bin/carddisp.pl?gene=CREM
GH1	Growth Hormone 1	Protein Coding	43	GC17M063917	8.25329	https://www.genecards.org/cgi-bin/carddisp.pl?gene=GH1
GATA4	GATA Binding Protein 4	Protein Coding	48	GC08P011676	8.12575	https://www.genecards.org/cgi-bin/carddisp.pl?gene=GATA4
PPARGC1A	PPARG Coactivator 1 Alpha	Protein Coding	45	GC04M023755	8.10225	https://www.genecards.org/cgi-bin/carddisp.pl?gene=PPARGC1A
VIP	Vasoactive Intestinal Peptide	Protein Coding	44	GC06P152750	8.09404	https://www.genecards.org/cgi-bin/carddisp.pl?gene=VIP
CSNK2A1	Casein Kinase 2 Alpha 1	Protein Coding	50	GC20M000472	8.08468	https://www.genecards.org/cgi-bin/carddisp.pl?gene=CSNK2A1
NR3C1	Nuclear Receptor Subfamily 3 Group C Member 1	Protein Coding	49	GC05M143277	8.07728	https://www.genecards.org/cgi-bin/carddisp.pl?gene=NR3C1
NONO	Non-POU Domain Containing Octamer Binding	Protein Coding	44	GC0XP071255	8.05337	https://www.genecards.org/cgi-bin/carddisp.pl?gene=NONO
POMC	Proopiomelanocortin	Protein Coding	46	GC02M025160	7.97765	https://www.genecards.org/cgi-bin/carddisp.pl?gene=POMC
AKAP9	A-Kinase Anchoring Protein 9	Protein Coding	44	GC07P091940	7.69842	https://www.genecards.org/cgi-bin/carddisp.pl?gene=AKAP9
HTR7	5-Hydroxytryptamine Receptor 7	Protein Coding	46	GC10M090740	7.64844	https://www.genecards.org/cgi-bin/carddisp.pl?gene=HTR7
PHLPP1	PH Domain And Leucine Rich Repeat Protein Phosphatase 1	Protein Coding	39	GC18P062715	7.58348	https://www.genecards.org/cgi-bin/carddisp.pl?gene=PHLPP1
ALB	Albumin	Protein Coding	48	GC04P073397	7.55439	https://www.genecards.org/cgi-bin/carddisp.pl?gene=ALB
IGF1	Insulin Like Growth Factor 1	Protein Coding	48	GC12M102395	7.50993	https://www.genecards.org/cgi-bin/carddisp.pl?gene=IGF1
PRKAA2	Protein Kinase AMP-Activated Catalytic Subunit Alpha 2	Protein Coding	49	GC01P056645	7.39848	https://www.genecards.org/cgi-bin/carddisp.pl?gene=PRKAA2
RBM4	RNA Binding Motif Protein 4	Protein Coding	40	GC11P066638	7.39642	https://www.genecards.org/cgi-bin/carddisp.pl?gene=RBM4
CALM1	Calmodulin 1	Protein Coding	45	GC14P090396	7.36885	https://www.genecards.org/cgi-bin/carddisp.pl?gene=CALM1
CALM3	Calmodulin 3	Protein Coding	43	GC19P046601	7.25369	https://www.genecards.org/cgi-bin/carddisp.pl?gene=CALM3
PRKAA1	Protein Kinase AMP-Activated Catalytic Subunit Alpha 1	Protein Coding	46	GC05M040759	7.19444	https://www.genecards.org/cgi-bin/carddisp.pl?gene=PRKAA1
PPP1CC	Protein Phosphatase 1 Catalytic Subunit Gamma	Protein Coding	44	GC12M110709	7.15194	https://www.genecards.org/cgi-bin/carddisp.pl?gene=PPP1CC
HDAC3	Histone Deacetylase 3	Protein Coding	49	GC05M141583	7.13779	https://www.genecards.org/cgi-bin/carddisp.pl?gene=HDAC3
ADCYAP1	Adenylate Cyclase Activating Polypeptide 1	Protein Coding	41	GC18P000895	7.10325	https://www.genecards.org/cgi-bin/carddisp.pl?gene=ADCYAP1
ZFHX3	Zinc Finger Homeobox 3	Protein Coding	41	GC16M072782	7.06564	https://www.genecards.org/cgi-bin/carddisp.pl?gene=ZFHX3
ADIPOQ	Adiponectin, C1Q And Collagen Domain Containing	Protein Coding	44	GC03P186842	7.03656	https://www.genecards.org/cgi-bin/carddisp.pl?gene=ADIPOQ
NPPB	Natriuretic Peptide B	Protein Coding	43	GC01M011858	6.94462	https://www.genecards.org/cgi-bin/carddisp.pl?gene=NPPB
HCRTR2	Hypocretin Receptor 2	Protein Coding	44	GC06P055106	6.93952	https://www.genecards.org/cgi-bin/carddisp.pl?gene=HCRTR2
USP2	Ubiquitin Specific Peptidase 2	Protein Coding	43	GC11M119355	6.92093	https://www.genecards.org/cgi-bin/carddisp.pl?gene=USP2
EZH2	Enhancer Of Zeste 2 Polycomb Repressive Complex 2 Subunit	Protein Coding	53	GC07M148807	6.91122	https://www.genecards.org/cgi-bin/carddisp.pl?gene=EZH2
NALCN	Sodium Leak Channel, Non-Selective	Protein Coding	40	GC13M101053	6.82147	https://www.genecards.org/cgi-bin/carddisp.pl?gene=NALCN
PLAT	Plasminogen Activator, Tissue Type	Protein Coding	48	GC08M042174	6.79327	https://www.genecards.org/cgi-bin/carddisp.pl?gene=PLAT
DRD4	Dopamine Receptor D4	Protein Coding	46	GC11P001164	6.76861	https://www.genecards.org/cgi-bin/carddisp.pl?gene=DRD4
KCND2	Potassium Voltage-Gated Channel Subfamily D Member 2	Protein Coding	44	GC07P120273	6.74749	https://www.genecards.org/cgi-bin/carddisp.pl?gene=KCND2
ASMT	Acetylserotonin O-Methyltransferase	Protein Coding	38	GC0XP001595	6.64853	https://www.genecards.org/cgi-bin/carddisp.pl?gene=ASMT
TRPM4	Transient Receptor Potential Cation Channel Subfamily M Member 4	Protein Coding	45	GC19P049157	6.6354	https://www.genecards.org/cgi-bin/carddisp.pl?gene=TRPM4
EP300	E1A Binding Protein P300	Protein Coding	50	GC22P041091	6.55665	https://www.genecards.org/cgi-bin/carddisp.pl?gene=EP300
PPP1CA	Protein Phosphatase 1 Catalytic Subunit Alpha	Protein Coding	47	GC11M074635	6.55234	https://www.genecards.org/cgi-bin/carddisp.pl?gene=PPP1CA
PPP1CB	Protein Phosphatase 1 Catalytic Subunit Beta	Protein Coding	45	GC02P028752	6.55234	https://www.genecards.org/cgi-bin/carddisp.pl?gene=PPP1CB
CRP	C-Reactive Protein	Protein Coding	45	GC01M159721	6.52968	https://www.genecards.org/cgi-bin/carddisp.pl?gene=CRP
HNF4A	Hepatocyte Nuclear Factor 4 Alpha	Protein Coding	50	GC20P044355	6.50694	https://www.genecards.org/cgi-bin/carddisp.pl?gene=HNF4A
GRIN2B	Glutamate Ionotropic Receptor NMDA Type Subunit 2B	Protein Coding	50	GC12M013437	6.50396	https://www.genecards.org/cgi-bin/carddisp.pl?gene=GRIN2B
FOS	Fos Proto-Oncogene, AP-1 Transcription Factor Subunit	Protein Coding	49	GC14P075278	6.49409	https://www.genecards.org/cgi-bin/carddisp.pl?gene=FOS
UBE3A	Ubiquitin Protein Ligase E3A	Protein Coding	47	GC15M025333	6.45329	https://www.genecards.org/cgi-bin/carddisp.pl?gene=UBE3A
MTA1	Metastasis Associated 1	Protein Coding	42	GC14P105419	6.453	https://www.genecards.org/cgi-bin/carddisp.pl?gene=MTA1
APOE	Apolipoprotein E	Protein Coding	49	GC19P044906	6.44181	https://www.genecards.org/cgi-bin/carddisp.pl?gene=APOE
CREBBP	CREB Binding Protein	Protein Coding	51	GC16M004352	6.44167	https://www.genecards.org/cgi-bin/carddisp.pl?gene=CREBBP
CALM2	Calmodulin 2	Protein Coding	45	GC02M047124	6.39161	https://www.genecards.org/cgi-bin/carddisp.pl?gene=CALM2
DRD2	Dopamine Receptor D2	Protein Coding	49	GC11M113409	6.31281	https://www.genecards.org/cgi-bin/carddisp.pl?gene=DRD2
EDN1	Endothelin 1	Protein Coding	46	GC06P012256	6.27237	https://www.genecards.org/cgi-bin/carddisp.pl?gene=EDN1
FBXW11	F-Box And WD Repeat Domain Containing 11	Protein Coding	44	GC05M171861	6.26391	https://www.genecards.org/cgi-bin/carddisp.pl?gene=FBXW11
TBX5	T-Box Transcription Factor 5	Protein Coding	45	GC12M114353	6.25855	https://www.genecards.org/cgi-bin/carddisp.pl?gene=TBX5
KDM2A	Lysine Demethylase 2A	Protein Coding	40	GC11P067119	6.20001	https://www.genecards.org/cgi-bin/carddisp.pl?gene=KDM2A
SYNE2	Spectrin Repeat Containing Nuclear Envelope Protein 2	Protein Coding	38	GC14P063761	6.16123	https://www.genecards.org/cgi-bin/carddisp.pl?gene=SYNE2
AHR	Aryl Hydrocarbon Receptor	Protein Coding	48	GC07P016916	6.07851	https://www.genecards.org/cgi-bin/carddisp.pl?gene=AHR
KDM5A	Lysine Demethylase 5A	Protein Coding	41	GC12M000280	6.06905	https://www.genecards.org/cgi-bin/carddisp.pl?gene=KDM5A
HLF	HLF Transcription Factor, PAR BZIP Family Member	Protein Coding	39	GC17P055264	5.96915	https://www.genecards.org/cgi-bin/carddisp.pl?gene=HLF
MAPK8	Mitogen-Activated Protein Kinase 8	Protein Coding	49	GC10P048306	5.95258	https://www.genecards.org/cgi-bin/carddisp.pl?gene=MAPK8
PIWIL2	Piwi Like RNA-Mediated Gene Silencing 2	Protein Coding	37	GC08P022275	5.92471	https://www.genecards.org/cgi-bin/carddisp.pl?gene=PIWIL2
NCOA2	Nuclear Receptor Coactivator 2	Protein Coding	44	GC08M070109	5.92453	https://www.genecards.org/cgi-bin/carddisp.pl?gene=NCOA2
TPTEP2-CSNK1E	TPTEP2-CSNK1E Readthrough	Protein Coding	15	GC22M052002	5.91964	https://www.genecards.org/cgi-bin/carddisp.pl?gene=TPTEP2-CSNK1E
NAMPT	Nicotinamide Phosphoribosyltransferase	Protein Coding	46	GC07M106248	5.9003	https://www.genecards.org/cgi-bin/carddisp.pl?gene=NAMPT
F7	Coagulation Factor VII	Protein Coding	47	GC13P113105	5.88559	https://www.genecards.org/cgi-bin/carddisp.pl?gene=F7
METTL3	Methyltransferase 3, N6-Adenosine-Methyltransferase Complex Catalytic Subunit	Protein Coding	39	GC14M021498	5.86203	https://www.genecards.org/cgi-bin/carddisp.pl?gene=METTL3
THRAP3	Thyroid Hormone Receptor Associated Protein 3	Protein Coding	37	GC01P036224	5.85805	https://www.genecards.org/cgi-bin/carddisp.pl?gene=THRAP3
TPH1	Tryptophan Hydroxylase 1	Protein Coding	44	GC11M018040	5.82607	https://www.genecards.org/cgi-bin/carddisp.pl?gene=TPH1
PPARA	Peroxisome Proliferator Activated Receptor Alpha	Protein Coding	45	GC22P046150	5.80989	https://www.genecards.org/cgi-bin/carddisp.pl?gene=PPARA
CUL1	Cullin 1	Protein Coding	44	GC07P148697	5.8064	https://www.genecards.org/cgi-bin/carddisp.pl?gene=CUL1
MIR182	MicroRNA 182	RNA Gene	20	GC07M129770	5.76977	https://www.genecards.org/cgi-bin/carddisp.pl?gene=MIR182
KMT2A	Lysine Methyltransferase 2A	Protein Coding	44	GC11P118436	5.76844	https://www.genecards.org/cgi-bin/carddisp.pl?gene=KMT2A
NCOR1	Nuclear Receptor Corepressor 1	Protein Coding	43	GC17M016029	5.72111	https://www.genecards.org/cgi-bin/carddisp.pl?gene=NCOR1
DPYD	Dihydropyrimidine Dehydrogenase	Protein Coding	52	GC01M097015	5.72024	https://www.genecards.org/cgi-bin/carddisp.pl?gene=DPYD
TOP1	DNA Topoisomerase I	Protein Coding	47	GC20P041028	5.70569	https://www.genecards.org/cgi-bin/carddisp.pl?gene=TOP1
NRIP1	Nuclear Receptor Interacting Protein 1	Protein Coding	42	GC21M014961	5.69175	https://www.genecards.org/cgi-bin/carddisp.pl?gene=NRIP1
ADRB1	Adrenoceptor Beta 1	Protein Coding	48	GC10P114044	5.67477	https://www.genecards.org/cgi-bin/carddisp.pl?gene=ADRB1
SERPINC1	Serpin Family C Member 1	Protein Coding	47	GC01M174312	5.59739	https://www.genecards.org/cgi-bin/carddisp.pl?gene=SERPINC1
NKX2-1	NK2 Homeobox 1	Protein Coding	45	GC14M036516	5.59526	https://www.genecards.org/cgi-bin/carddisp.pl?gene=NKX2-1
TH	Tyrosine Hydroxylase	Protein Coding	51	GC11M002163	5.59379	https://www.genecards.org/cgi-bin/carddisp.pl?gene=TH
ADORA2A	Adenosine A2a Receptor	Protein Coding	45	GC22P024417	5.5779	https://www.genecards.org/cgi-bin/carddisp.pl?gene=ADORA2A
CD36	CD36 Molecule	Protein Coding	47	GC07P080369	5.55233	https://www.genecards.org/cgi-bin/carddisp.pl?gene=CD36
MAGEL2	MAGE Family Member L2	Protein Coding	36	GC15M023643	5.51078	https://www.genecards.org/cgi-bin/carddisp.pl?gene=MAGEL2
PPP5C	Protein Phosphatase 5 Catalytic Subunit	Protein Coding	44	GC19P046346	5.51035	https://www.genecards.org/cgi-bin/carddisp.pl?gene=PPP5C
SKP1	S-Phase Kinase Associated Protein 1	Protein Coding	42	GC05M134148	5.50881	https://www.genecards.org/cgi-bin/carddisp.pl?gene=SKP1
HTR1A	5-Hydroxytryptamine Receptor 1A	Protein Coding	46	GC05M063960	5.49738	https://www.genecards.org/cgi-bin/carddisp.pl?gene=HTR1A
FBN1	Fibrillin 1	Protein Coding	45	GC15M048408	5.47579	https://www.genecards.org/cgi-bin/carddisp.pl?gene=FBN1
NOS1AP	Nitric Oxide Synthase 1 Adaptor Protein	Protein Coding	38	GC01P162069	5.4342	https://www.genecards.org/cgi-bin/carddisp.pl?gene=NOS1AP
EGR3	Early Growth Response 3	Protein Coding	39	GC08M022687	5.42622	https://www.genecards.org/cgi-bin/carddisp.pl?gene=EGR3
PROX1	Prospero Homeobox 1	Protein Coding	42	GC01P213983	5.41371	https://www.genecards.org/cgi-bin/carddisp.pl?gene=PROX1
KLF9	Kruppel Like Factor 9	Protein Coding	36	GC09M070384	5.41311	https://www.genecards.org/cgi-bin/carddisp.pl?gene=KLF9
PRKACA	Protein Kinase CAMP-Activated Catalytic Subunit Alpha	Protein Coding	50	GC19M014215	5.41274	https://www.genecards.org/cgi-bin/carddisp.pl?gene=PRKACA
IL1B	Interleukin 1 Beta	Protein Coding	47	GC02M112829	5.40468	https://www.genecards.org/cgi-bin/carddisp.pl?gene=IL1B
BDNF	Brain Derived Neurotrophic Factor	Protein Coding	46	GC11M027654	5.40242	https://www.genecards.org/cgi-bin/carddisp.pl?gene=BDNF
PTH	Parathyroid Hormone	Protein Coding	45	GC11M013492	5.39472	https://www.genecards.org/cgi-bin/carddisp.pl?gene=PTH
MAPK1	Mitogen-Activated Protein Kinase 1	Protein Coding	51	GC22M021759	5.37517	https://www.genecards.org/cgi-bin/carddisp.pl?gene=MAPK1
HDAC1	Histone Deacetylase 1	Protein Coding	48	GC01P032292	5.37009	https://www.genecards.org/cgi-bin/carddisp.pl?gene=HDAC1
ADA	Adenosine Deaminase	Protein Coding	50	GC20M044620	5.36435	https://www.genecards.org/cgi-bin/carddisp.pl?gene=ADA
PRKCG	Protein Kinase C Gamma	Protein Coding	51	GC19P053879	5.3631	https://www.genecards.org/cgi-bin/carddisp.pl?gene=PRKCG
PML	PML Nuclear Body Scaffold	Protein Coding	45	GC15P073994	5.35372	https://www.genecards.org/cgi-bin/carddisp.pl?gene=PML
KLF10	Kruppel Like Factor 10	Protein Coding	42	GC08M102648	5.34382	https://www.genecards.org/cgi-bin/carddisp.pl?gene=KLF10
ADCY1	Adenylate Cyclase 1	Protein Coding	48	GC07P045580	5.31158	https://www.genecards.org/cgi-bin/carddisp.pl?gene=ADCY1
IMPDH2	Inosine Monophosphate Dehydrogenase 2	Protein Coding	45	GC03M049571	5.29332	https://www.genecards.org/cgi-bin/carddisp.pl?gene=IMPDH2
NR0B2	Nuclear Receptor Subfamily 0 Group B Member 2	Protein Coding	43	GC01M026925	5.28979	https://www.genecards.org/cgi-bin/carddisp.pl?gene=NR0B2
AGT	Angiotensinogen	Protein Coding	48	GC01M230702	5.26999	https://www.genecards.org/cgi-bin/carddisp.pl?gene=AGT
ASS1	Argininosuccinate Synthase 1	Protein Coding	47	GC09P130444	5.25665	https://www.genecards.org/cgi-bin/carddisp.pl?gene=ASS1
ATOH7	Atonal BHLH Transcription Factor 7	Protein Coding	40	GC10M068230	5.24684	https://www.genecards.org/cgi-bin/carddisp.pl?gene=ATOH7
SETX	Senataxin	Protein Coding	40	GC09M132261	5.24339	https://www.genecards.org/cgi-bin/carddisp.pl?gene=SETX
ID2	Inhibitor Of DNA Binding 2	Protein Coding	43	GC02P008678	5.2239	https://www.genecards.org/cgi-bin/carddisp.pl?gene=ID2
NODAL	Nodal Growth Differentiation Factor	Protein Coding	42	GC10M070431	5.19323	https://www.genecards.org/cgi-bin/carddisp.pl?gene=NODAL
CSNK2A2	Casein Kinase 2 Alpha 2	Protein Coding	46	GC16M058157	5.15988	https://www.genecards.org/cgi-bin/carddisp.pl?gene=CSNK2A2
SELP	Selectin P	Protein Coding	44	GC01M169558	5.15435	https://www.genecards.org/cgi-bin/carddisp.pl?gene=SELP
VWF	Von Willebrand Factor	Protein Coding	48	GC12M005917	5.14121	https://www.genecards.org/cgi-bin/carddisp.pl?gene=VWF
GNB5	G Protein Subunit Beta 5	Protein Coding	44	GC15M070705	5.14076	https://www.genecards.org/cgi-bin/carddisp.pl?gene=GNB5
SCN1A	Sodium Voltage-Gated Channel Alpha Subunit 1	Protein Coding	46	GC02M165989	5.12466	https://www.genecards.org/cgi-bin/carddisp.pl?gene=SCN1A
NR3C2	Nuclear Receptor Subfamily 3 Group C Member 2	Protein Coding	47	GC04M148078	5.10891	https://www.genecards.org/cgi-bin/carddisp.pl?gene=NR3C2
MTOR	Mechanistic Target Of Rapamycin Kinase	Protein Coding	53	GC01M011106	5.09622	https://www.genecards.org/cgi-bin/carddisp.pl?gene=MTOR
SST	Somatostatin	Protein Coding	41	GC03M187668	5.07106	https://www.genecards.org/cgi-bin/carddisp.pl?gene=SST
TEF	TEF Transcription Factor, PAR BZIP Family Member	Protein Coding	37	GC22P041367	5.06654	https://www.genecards.org/cgi-bin/carddisp.pl?gene=TEF
NDUFA9	NADH:Ubiquinone Oxidoreductase Subunit A9	Protein Coding	43	GC12P004649	5.02086	https://www.genecards.org/cgi-bin/carddisp.pl?gene=NDUFA9
TIPIN	TIMELESS Interacting Protein	Protein Coding	38	GC15M070583	5.00973	https://www.genecards.org/cgi-bin/carddisp.pl?gene=TIPIN
SFPQ	Splicing Factor Proline And Glutamine Rich	Protein Coding	42	GC01M035176	4.97234	https://www.genecards.org/cgi-bin/carddisp.pl?gene=SFPQ
VIPR2	Vasoactive Intestinal Peptide Receptor 2	Protein Coding	44	GC07M159028	4.95945	https://www.genecards.org/cgi-bin/carddisp.pl?gene=VIPR2
SIN3A	SIN3 Transcription Regulator Family Member A	Protein Coding	45	GC15M075369	4.95519	https://www.genecards.org/cgi-bin/carddisp.pl?gene=SIN3A
NOS3	Nitric Oxide Synthase 3	Protein Coding	50	GC07P150990	4.94225	https://www.genecards.org/cgi-bin/carddisp.pl?gene=NOS3
MAGED1	MAGE Family Member D1	Protein Coding	41	GC0XP051803	4.91756	https://www.genecards.org/cgi-bin/carddisp.pl?gene=MAGED1
BGLAP	Bone Gamma-Carboxyglutamate Protein	Protein Coding	40	GC01P156242	4.91629	https://www.genecards.org/cgi-bin/carddisp.pl?gene=BGLAP
CPT1A	Carnitine Palmitoyltransferase 1A	Protein Coding	48	GC11M068754	4.91284	https://www.genecards.org/cgi-bin/carddisp.pl?gene=CPT1A
NPY2R	Neuropeptide Y Receptor Y2	Protein Coding	43	GC04P155173	4.86259	https://www.genecards.org/cgi-bin/carddisp.pl?gene=NPY2R
GJA1	Gap Junction Protein Alpha 1	Protein Coding	50	GC06P121436	4.84575	https://www.genecards.org/cgi-bin/carddisp.pl?gene=GJA1
MAPK10	Mitogen-Activated Protein Kinase 10	Protein Coding	50	GC04M085990	4.7976	https://www.genecards.org/cgi-bin/carddisp.pl?gene=MAPK10
MAPK9	Mitogen-Activated Protein Kinase 9	Protein Coding	47	GC05M180238	4.7728	https://www.genecards.org/cgi-bin/carddisp.pl?gene=MAPK9
GCG	Glucagon	Protein Coding	40	GC02M162142	4.75841	https://www.genecards.org/cgi-bin/carddisp.pl?gene=GCG
NPY5R	Neuropeptide Y Receptor Y5	Protein Coding	42	GC04P163343	4.70795	https://www.genecards.org/cgi-bin/carddisp.pl?gene=NPY5R
LGR4	Leucine Rich Repeat Containing G Protein-Coupled Receptor 4	Protein Coding	39	GC11M027365	4.70756	https://www.genecards.org/cgi-bin/carddisp.pl?gene=LGR4
DHX30	DExH-Box Helicase 30	Protein Coding	40	GC03P047802	4.69429	https://www.genecards.org/cgi-bin/carddisp.pl?gene=DHX30
OPN5	Opsin 5	Protein Coding	35	GC06P061411	4.68033	https://www.genecards.org/cgi-bin/carddisp.pl?gene=OPN5
ATF4	Activating Transcription Factor 4	Protein Coding	45	GC22P039565	4.64244	https://www.genecards.org/cgi-bin/carddisp.pl?gene=ATF4
PF4	Platelet Factor 4	Protein Coding	40	GC04M073980	4.63976	https://www.genecards.org/cgi-bin/carddisp.pl?gene=PF4
CCAR2	Cell Cycle And Apoptosis Regulator 2	Protein Coding	36	GC08P022604	4.62593	https://www.genecards.org/cgi-bin/carddisp.pl?gene=CCAR2
CCNA2	Cyclin A2	Protein Coding	44	GC04M121816	4.61155	https://www.genecards.org/cgi-bin/carddisp.pl?gene=CCNA2
USP9X	Ubiquitin Specific Peptidase 9 X-Linked	Protein Coding	46	GC0XP041085	4.60227	https://www.genecards.org/cgi-bin/carddisp.pl?gene=USP9X
MC3R	Melanocortin 3 Receptor	Protein Coding	42	GC20P056248	4.58352	https://www.genecards.org/cgi-bin/carddisp.pl?gene=MC3R
ADORA1	Adenosine A1 Receptor	Protein Coding	46	GC01P203090	4.58133	https://www.genecards.org/cgi-bin/carddisp.pl?gene=ADORA1
NGFR	Nerve Growth Factor Receptor	Protein Coding	44	GC17P049495	4.57557	https://www.genecards.org/cgi-bin/carddisp.pl?gene=NGFR
KLF15	Kruppel Like Factor 15	Protein Coding	41	GC03M126293	4.5367	https://www.genecards.org/cgi-bin/carddisp.pl?gene=KLF15
HNRNPU	Heterogeneous Nuclear Ribonucleoprotein U	Protein Coding	42	GC01M244844	4.52096	https://www.genecards.org/cgi-bin/carddisp.pl?gene=HNRNPU
LOC110806262	Solute Carrier Family 6 Member 4 Gene Promoter	Biological Region	1	GC17P030235	4.51762	https://www.genecards.org/cgi-bin/carddisp.pl?gene=LOC110806262
DDB1	Damage Specific DNA Binding Protein 1	Protein Coding	42	GC11M074289	4.50556	https://www.genecards.org/cgi-bin/carddisp.pl?gene=DDB1
LEPQTL1	Leptin, Serum Levels Of	Genetic Locus	2	GC02U903086	4.50246	https://www.genecards.org/cgi-bin/carddisp.pl?gene=LEPQTL1
ROCK2	Rho Associated Coiled-Coil Containing Protein Kinase 2	Protein Coding	46	GC02M011253	4.47934	https://www.genecards.org/cgi-bin/carddisp.pl?gene=ROCK2
GNRH1	Gonadotropin Releasing Hormone 1	Protein Coding	41	GC08M025419	4.47253	https://www.genecards.org/cgi-bin/carddisp.pl?gene=GNRH1
SPSB4	SplA/Ryanodine Receptor Domain And SOCS Box Containing 4	Protein Coding	31	GC03P141051	4.41126	https://www.genecards.org/cgi-bin/carddisp.pl?gene=SPSB4
COMT	Catechol-O-Methyltransferase	Protein Coding	50	GC22P019941	4.35914	https://www.genecards.org/cgi-bin/carddisp.pl?gene=COMT
USP7	Ubiquitin Specific Peptidase 7	Protein Coding	48	GC16M008892	4.35499	https://www.genecards.org/cgi-bin/carddisp.pl?gene=USP7
SLC12A3	Solute Carrier Family 12 Member 3	Protein Coding	45	GC16P056865	4.35432	https://www.genecards.org/cgi-bin/carddisp.pl?gene=SLC12A3
GHRH	Growth Hormone Releasing Hormone	Protein Coding	38	GC20M037251	4.34294	https://www.genecards.org/cgi-bin/carddisp.pl?gene=GHRH
HNRNPD	Heterogeneous Nuclear Ribonucleoprotein D	Protein Coding	42	GC04M082352	4.32718	https://www.genecards.org/cgi-bin/carddisp.pl?gene=HNRNPD
HIF1A	Hypoxia Inducible Factor 1 Subunit Alpha	Protein Coding	46	GC14P061695	4.32454	https://www.genecards.org/cgi-bin/carddisp.pl?gene=HIF1A
AVPR1A	Arginine Vasopressin Receptor 1A	Protein Coding	45	GC12M063142	4.30757	https://www.genecards.org/cgi-bin/carddisp.pl?gene=AVPR1A
F3	Coagulation Factor III, Tissue Factor	Protein Coding	44	GC01M094530	4.28386	https://www.genecards.org/cgi-bin/carddisp.pl?gene=F3
PDE8B	Phosphodiesterase 8B	Protein Coding	45	GC05P077180	4.26425	https://www.genecards.org/cgi-bin/carddisp.pl?gene=PDE8B
SIAH2	Siah E3 Ubiquitin Protein Ligase 2	Protein Coding	44	GC03M150741	4.25656	https://www.genecards.org/cgi-bin/carddisp.pl?gene=SIAH2
ESR1	Estrogen Receptor 1	Protein Coding	51	GC06P151656	4.22938	https://www.genecards.org/cgi-bin/carddisp.pl?gene=ESR1
KAT2B	Lysine Acetyltransferase 2B	Protein Coding	47	GC03P020043	4.22353	https://www.genecards.org/cgi-bin/carddisp.pl?gene=KAT2B
TARDBP	TAR DNA Binding Protein	Protein Coding	45	GC01P011013	4.17655	https://www.genecards.org/cgi-bin/carddisp.pl?gene=TARDBP
PRKDC	Protein Kinase, DNA-Activated, Catalytic Subunit	Protein Coding	49	GC08M047773	4.16641	https://www.genecards.org/cgi-bin/carddisp.pl?gene=PRKDC
CHEK1	Checkpoint Kinase 1	Protein Coding	49	GC11P125625	4.15595	https://www.genecards.org/cgi-bin/carddisp.pl?gene=CHEK1
RASD1	Ras Related Dexamethasone Induced 1	Protein Coding	39	GC17M017494	4.13362	https://www.genecards.org/cgi-bin/carddisp.pl?gene=RASD1
GPR176	G Protein-Coupled Receptor 176	Protein Coding	34	GC15M039799	4.10478	https://www.genecards.org/cgi-bin/carddisp.pl?gene=GPR176
FBXL21P	F-Box And Leucine Rich Repeat Protein 21, Pseudogene	Pseudogene	20	GC05P135931	4.10293	https://www.genecards.org/cgi-bin/carddisp.pl?gene=FBXL21P
SLK	STE20 Like Kinase	Protein Coding	43	GC10P103967	4.0529	https://www.genecards.org/cgi-bin/carddisp.pl?gene=SLK
LGALS4	Galectin 4	Protein Coding	37	GC19M051101	4.0529	https://www.genecards.org/cgi-bin/carddisp.pl?gene=LGALS4
TOP3A	DNA Topoisomerase III Alpha	Protein Coding	41	GC17M018271	4.02647	https://www.genecards.org/cgi-bin/carddisp.pl?gene=TOP3A
ID3	Inhibitor Of DNA Binding 3, HLH Protein	Protein Coding	41	GC01M023557	4.00067	https://www.genecards.org/cgi-bin/carddisp.pl?gene=ID3
SERPINA3	Serpin Family A Member 3	Protein Coding	42	GC14P094612	3.99523	https://www.genecards.org/cgi-bin/carddisp.pl?gene=SERPINA3
GPT	Glutamic--Pyruvic Transaminase	Protein Coding	41	GC08P144502	3.99439	https://www.genecards.org/cgi-bin/carddisp.pl?gene=GPT
APP	Amyloid Beta Precursor Protein	Protein Coding	50	GC21M025880	3.98351	https://www.genecards.org/cgi-bin/carddisp.pl?gene=APP
HUWE1	HECT, UBA And WWE Domain Containing E3 Ubiquitin Protein Ligase 1	Protein Coding	43	GC0XM053532	3.97875	https://www.genecards.org/cgi-bin/carddisp.pl?gene=HUWE1
PRMT5	Protein Arginine Methyltransferase 5	Protein Coding	42	GC14M022920	3.96054	https://www.genecards.org/cgi-bin/carddisp.pl?gene=PRMT5
CST3	Cystatin C	Protein Coding	43	GC20M023627	3.95134	https://www.genecards.org/cgi-bin/carddisp.pl?gene=CST3
PTEN	Phosphatase And Tensin Homolog	Protein Coding	51	GC10P087863	3.94871	https://www.genecards.org/cgi-bin/carddisp.pl?gene=PTEN
GHR	Growth Hormone Receptor	Protein Coding	45	GC05P042429	3.94151	https://www.genecards.org/cgi-bin/carddisp.pl?gene=GHR
PPBP	Pro-Platelet Basic Protein	Protein Coding	42	GC04M073986	3.93861	https://www.genecards.org/cgi-bin/carddisp.pl?gene=PPBP
NAGLU	N-Acetyl-Alpha-Glucosaminidase	Protein Coding	41	GC17P042571	3.93328	https://www.genecards.org/cgi-bin/carddisp.pl?gene=NAGLU
F2	Coagulation Factor II, Thrombin	Protein Coding	47	GC11P046720	3.91981	https://www.genecards.org/cgi-bin/carddisp.pl?gene=F2
EPO	Erythropoietin	Protein Coding	40	GC07P100720	3.89816	https://www.genecards.org/cgi-bin/carddisp.pl?gene=EPO
EGR1	Early Growth Response 1	Protein Coding	42	GC05P138465	3.88826	https://www.genecards.org/cgi-bin/carddisp.pl?gene=EGR1
SCN8A	Sodium Voltage-Gated Channel Alpha Subunit 8	Protein Coding	46	GC12P051590	3.86978	https://www.genecards.org/cgi-bin/carddisp.pl?gene=SCN8A
PRKCA	Protein Kinase C Alpha	Protein Coding	50	GC17P066302	3.86477	https://www.genecards.org/cgi-bin/carddisp.pl?gene=PRKCA
CACNA1D	Calcium Voltage-Gated Channel Subunit Alpha1 D	Protein Coding	46	GC03P053328	3.86327	https://www.genecards.org/cgi-bin/carddisp.pl?gene=CACNA1D
KDM8	Lysine Demethylase 8	Protein Coding	34	GC16P027214	3.86139	https://www.genecards.org/cgi-bin/carddisp.pl?gene=KDM8
CCK	Cholecystokinin	Protein Coding	41	GC03M042274	3.85689	https://www.genecards.org/cgi-bin/carddisp.pl?gene=CCK
CAVIN3	Caveolae Associated Protein 3	Protein Coding	29	GC11M006319	3.84172	https://www.genecards.org/cgi-bin/carddisp.pl?gene=CAVIN3
RELB	RELB Proto-Oncogene, NF-KB Subunit	Protein Coding	45	GC19P045002	3.82948	https://www.genecards.org/cgi-bin/carddisp.pl?gene=RELB
DDX5	DEAD-Box Helicase 5	Protein Coding	46	GC17M064498	3.82417	https://www.genecards.org/cgi-bin/carddisp.pl?gene=DDX5
DHX9	DExH-Box Helicase 9	Protein Coding	40	GC01P182839	3.82417	https://www.genecards.org/cgi-bin/carddisp.pl?gene=DHX9
RYR1	Ryanodine Receptor 1	Protein Coding	46	GC19P042548	3.82217	https://www.genecards.org/cgi-bin/carddisp.pl?gene=RYR1
MYCBP2	MYC Binding Protein 2	Protein Coding	37	GC13M077044	3.82044	https://www.genecards.org/cgi-bin/carddisp.pl?gene=MYCBP2
ARNT	Aryl Hydrocarbon Receptor Nuclear Translocator	Protein Coding	43	GC01M150809	3.81316	https://www.genecards.org/cgi-bin/carddisp.pl?gene=ARNT
AGTR1	Angiotensin II Receptor Type 1	Protein Coding	50	GC03P148697	3.80281	https://www.genecards.org/cgi-bin/carddisp.pl?gene=AGTR1
PIK3R2	Phosphoinositide-3-Kinase Regulatory Subunit 2	Protein Coding	49	GC19P018153	3.78168	https://www.genecards.org/cgi-bin/carddisp.pl?gene=PIK3R2
TKT	Transketolase	Protein Coding	46	GC03M053224	3.78148	https://www.genecards.org/cgi-bin/carddisp.pl?gene=TKT
SLC2A1	Solute Carrier Family 2 Member 1	Protein Coding	52	GC01M042925	3.75199	https://www.genecards.org/cgi-bin/carddisp.pl?gene=SLC2A1
DELEC1	Deleted In Esophageal Cancer 1	RNA Gene	23	GC09P117120	3.74074	https://www.genecards.org/cgi-bin/carddisp.pl?gene=DELEC1
DYRK1A	Dual Specificity Tyrosine Phosphorylation Regulated Kinase 1A	Protein Coding	49	GC21P037365	3.70796	https://www.genecards.org/cgi-bin/carddisp.pl?gene=DYRK1A
VCAM1	Vascular Cell Adhesion Molecule 1	Protein Coding	44	GC01P100719	3.70788	https://www.genecards.org/cgi-bin/carddisp.pl?gene=VCAM1
CSNK1A1	Casein Kinase 1 Alpha 1	Protein Coding	48	GC05M149492	3.70568	https://www.genecards.org/cgi-bin/carddisp.pl?gene=CSNK1A1
NTS	Neurotensin	Protein Coding	40	GC12P085876	3.69524	https://www.genecards.org/cgi-bin/carddisp.pl?gene=NTS
NOS2	Nitric Oxide Synthase 2	Protein Coding	49	GC17M027756	3.68672	https://www.genecards.org/cgi-bin/carddisp.pl?gene=NOS2
MYC	MYC Proto-Oncogene, BHLH Transcription Factor	Protein Coding	50	GC08P127735	3.66922	https://www.genecards.org/cgi-bin/carddisp.pl?gene=MYC
VEGFA	Vascular Endothelial Growth Factor A	Protein Coding	47	GC06P043770	3.63355	https://www.genecards.org/cgi-bin/carddisp.pl?gene=VEGFA
STAR	Steroidogenic Acute Regulatory Protein	Protein Coding	45	GC08M038145	3.63316	https://www.genecards.org/cgi-bin/carddisp.pl?gene=STAR
BTBD9	BTB Domain Containing 9	Protein Coding	36	GC06M038168	3.6124	https://www.genecards.org/cgi-bin/carddisp.pl?gene=BTBD9
CGA	Glycoprotein Hormones, Alpha Polypeptide	Protein Coding	42	GC06M087085	3.60403	https://www.genecards.org/cgi-bin/carddisp.pl?gene=CGA
WDR5	WD Repeat Domain 5	Protein Coding	43	GC09P134135	3.57302	https://www.genecards.org/cgi-bin/carddisp.pl?gene=WDR5
CAMK2G	Calcium/Calmodulin Dependent Protein Kinase II Gamma	Protein Coding	47	GC10M073812	3.57136	https://www.genecards.org/cgi-bin/carddisp.pl?gene=CAMK2G
TOP2A	DNA Topoisomerase II Alpha	Protein Coding	50	GC17M040388	3.56919	https://www.genecards.org/cgi-bin/carddisp.pl?gene=TOP2A
APOB	Apolipoprotein B	Protein Coding	45	GC02M020956	3.56467	https://www.genecards.org/cgi-bin/carddisp.pl?gene=APOB
HS3ST2	Heparan Sulfate-Glucosamine 3-Sulfotransferase 2	Protein Coding	39	GC16P022814	3.56345	https://www.genecards.org/cgi-bin/carddisp.pl?gene=HS3ST2
RBM4B	RNA Binding Motif Protein 4B	Protein Coding	34	GC11M066664	3.56136	https://www.genecards.org/cgi-bin/carddisp.pl?gene=RBM4B
PRKG1	Protein Kinase CGMP-Dependent 1	Protein Coding	50	GC10P050991	3.55832	https://www.genecards.org/cgi-bin/carddisp.pl?gene=PRKG1
PDE11A	Phosphodiesterase 11A	Protein Coding	46	GC02M177624	3.55478	https://www.genecards.org/cgi-bin/carddisp.pl?gene=PDE11A
PROKR2	Prokineticin Receptor 2	Protein Coding	41	GC20M005341	3.55372	https://www.genecards.org/cgi-bin/carddisp.pl?gene=PROKR2
CYP7A1	Cytochrome P450 Family 7 Subfamily A Member 1	Protein Coding	42	GC08M058476	3.55204	https://www.genecards.org/cgi-bin/carddisp.pl?gene=CYP7A1
NR1H2	Nuclear Receptor Subfamily 1 Group H Member 2	Protein Coding	47	GC19P050329	3.53863	https://www.genecards.org/cgi-bin/carddisp.pl?gene=NR1H2
PER3P1	PER3 Pseudogene 1	Pseudogene	6	GC07P009637	3.5297	https://www.genecards.org/cgi-bin/carddisp.pl?gene=PER3P1
MT-TL1	Mitochondrially Encoded TRNA-Leu (UUA/G) 1	RNA Gene	16	GCMTP003232	3.50768	https://www.genecards.org/cgi-bin/carddisp.pl?gene=MT-TL1
SPR	Sepiapterin Reductase	Protein Coding	49	GC02P072850	3.47739	https://www.genecards.org/cgi-bin/carddisp.pl?gene=SPR
CYP21A2	Cytochrome P450 Family 21 Subfamily A Member 2	Protein Coding	45	GC06P061194	3.47111	https://www.genecards.org/cgi-bin/carddisp.pl?gene=CYP21A2
LPA	Lipoprotein(A)	Protein Coding	41	GC06M160531	3.47071	https://www.genecards.org/cgi-bin/carddisp.pl?gene=LPA
CHGA	Chromogranin A	Protein Coding	41	GC14P092929	3.46714	https://www.genecards.org/cgi-bin/carddisp.pl?gene=CHGA
SMC1A	Structural Maintenance Of Chromosomes 1A	Protein Coding	45	GC0XM053374	3.46519	https://www.genecards.org/cgi-bin/carddisp.pl?gene=SMC1A
GNAS	GNAS Complex Locus	Protein Coding	50	GC20P058839	3.46178	https://www.genecards.org/cgi-bin/carddisp.pl?gene=GNAS
PSPC1	Paraspeckle Component 1	Protein Coding	36	GC13M019674	3.455	https://www.genecards.org/cgi-bin/carddisp.pl?gene=PSPC1
MLEC	Malectin	Protein Coding	36	GC12P120687	3.44699	https://www.genecards.org/cgi-bin/carddisp.pl?gene=MLEC
PTCH1	Patched 1	Protein Coding	49	GC09M095442	3.41779	https://www.genecards.org/cgi-bin/carddisp.pl?gene=PTCH1
ELF3	E74 Like ETS Transcription Factor 3	Protein Coding	39	GC01P202007	3.39139	https://www.genecards.org/cgi-bin/carddisp.pl?gene=ELF3
SUV39H1	Suppressor Of Variegation 3-9 Homolog 1	Protein Coding	43	GC0XP048839	3.36802	https://www.genecards.org/cgi-bin/carddisp.pl?gene=SUV39H1
PLCB4	Phospholipase C Beta 4	Protein Coding	46	GC20P009024	3.36775	https://www.genecards.org/cgi-bin/carddisp.pl?gene=PLCB4
EPAS1	Endothelial PAS Domain Protein 1	Protein Coding	48	GC02P046293	3.34572	https://www.genecards.org/cgi-bin/carddisp.pl?gene=EPAS1
IFNG	Interferon Gamma	Protein Coding	46	GC12M068154	3.32845	https://www.genecards.org/cgi-bin/carddisp.pl?gene=IFNG
FBXW7	F-Box And WD Repeat Domain Containing 7	Protein Coding	44	GC04M152321	3.32387	https://www.genecards.org/cgi-bin/carddisp.pl?gene=FBXW7
GRP	Gastrin Releasing Peptide	Protein Coding	40	GC18P059220	3.31317	https://www.genecards.org/cgi-bin/carddisp.pl?gene=GRP
SOD1	Superoxide Dismutase 1	Protein Coding	50	GC21P031659	3.30632	https://www.genecards.org/cgi-bin/carddisp.pl?gene=SOD1
FKBP1B	FKBP Prolyl Isomerase 1B	Protein Coding	39	GC02P024033	3.30558	https://www.genecards.org/cgi-bin/carddisp.pl?gene=FKBP1B
FGA	Fibrinogen Alpha Chain	Protein Coding	46	GC04M154583	3.30075	https://www.genecards.org/cgi-bin/carddisp.pl?gene=FGA
IGFBP1	Insulin Like Growth Factor Binding Protein 1	Protein Coding	42	GC07P047043	3.29741	https://www.genecards.org/cgi-bin/carddisp.pl?gene=IGFBP1
GNB3	G Protein Subunit Beta 3	Protein Coding	46	GC12P006839	3.28902	https://www.genecards.org/cgi-bin/carddisp.pl?gene=GNB3
PIK3CA	Phosphatidylinositol-4,5-Bisphosphate 3-Kinase Catalytic Subunit Alpha	Protein Coding	52	GC03P179148	3.28688	https://www.genecards.org/cgi-bin/carddisp.pl?gene=PIK3CA
MIR155	MicroRNA 155	RNA Gene	19	GC21P025573	3.28118	https://www.genecards.org/cgi-bin/carddisp.pl?gene=MIR155
MMP9	Matrix Metallopeptidase 9	Protein Coding	52	GC20P046008	3.27369	https://www.genecards.org/cgi-bin/carddisp.pl?gene=MMP9
SRRD	SRR1 Domain Containing	Protein Coding	32	GC22P026483	3.26662	https://www.genecards.org/cgi-bin/carddisp.pl?gene=SRRD
CNR1	Cannabinoid Receptor 1	Protein Coding	46	GC06M088139	3.25037	https://www.genecards.org/cgi-bin/carddisp.pl?gene=CNR1
JUND	JunD Proto-Oncogene, AP-1 Transcription Factor Subunit	Protein Coding	41	GC19M018279	3.23067	https://www.genecards.org/cgi-bin/carddisp.pl?gene=JUND
MDM2	MDM2 Proto-Oncogene	Protein Coding	52	GC12P068808	3.21484	https://www.genecards.org/cgi-bin/carddisp.pl?gene=MDM2
IGFBP3	Insulin Like Growth Factor Binding Protein 3	Protein Coding	44	GC07M045912	3.20328	https://www.genecards.org/cgi-bin/carddisp.pl?gene=IGFBP3
MAPK3	Mitogen-Activated Protein Kinase 3	Protein Coding	48	GC16M032181	3.18026	https://www.genecards.org/cgi-bin/carddisp.pl?gene=MAPK3
HFE	Homeostatic Iron Regulator	Protein Coding	42	GC06P026087	3.17046	https://www.genecards.org/cgi-bin/carddisp.pl?gene=HFE
SUV39H2	Suppressor Of Variegation 3-9 Homolog 2	Protein Coding	42	GC10P014878	3.15802	https://www.genecards.org/cgi-bin/carddisp.pl?gene=SUV39H2
HP	Haptoglobin	Protein Coding	43	GC16P072089	3.1516	https://www.genecards.org/cgi-bin/carddisp.pl?gene=HP
SERPINA6	Serpin Family A Member 6	Protein Coding	42	GC14M097109	3.14671	https://www.genecards.org/cgi-bin/carddisp.pl?gene=SERPINA6
AGRP	Agouti Related Neuropeptide	Protein Coding	42	GC16M067482	3.13209	https://www.genecards.org/cgi-bin/carddisp.pl?gene=AGRP
CALB1	Calbindin 1	Protein Coding	41	GC08M090058	3.12086	https://www.genecards.org/cgi-bin/carddisp.pl?gene=CALB1
NOS1	Nitric Oxide Synthase 1	Protein Coding	49	GC12M117208	3.10953	https://www.genecards.org/cgi-bin/carddisp.pl?gene=NOS1
PAX8	Paired Box 8	Protein Coding	45	GC02M113215	3.10864	https://www.genecards.org/cgi-bin/carddisp.pl?gene=PAX8
GJC1	Gap Junction Protein Gamma 1	Protein Coding	41	GC17M044800	3.08964	https://www.genecards.org/cgi-bin/carddisp.pl?gene=GJC1
TF	Transferrin	Protein Coding	48	GC03P133666	3.08872	https://www.genecards.org/cgi-bin/carddisp.pl?gene=TF
HERC2	HECT And RLD Domain Containing E3 Ubiquitin Protein Ligase 2	Protein Coding	44	GC15M028111	3.07987	https://www.genecards.org/cgi-bin/carddisp.pl?gene=HERC2
SMAD3	SMAD Family Member 3	Protein Coding	48	GC15P067063	3.07667	https://www.genecards.org/cgi-bin/carddisp.pl?gene=SMAD3
SHBG	Sex Hormone Binding Globulin	Protein Coding	39	GC17P007613	3.075	https://www.genecards.org/cgi-bin/carddisp.pl?gene=SHBG
ATG14	Autophagy Related 14	Protein Coding	36	GC14M055366	3.0733	https://www.genecards.org/cgi-bin/carddisp.pl?gene=ATG14
ALG10B	ALG10 Alpha-1,2-Glucosyltransferase B	Protein Coding	33	GC12P038316	3.06042	https://www.genecards.org/cgi-bin/carddisp.pl?gene=ALG10B
ESR2	Estrogen Receptor 2	Protein Coding	48	GC14M064084	3.0565	https://www.genecards.org/cgi-bin/carddisp.pl?gene=ESR2
PDE6B	Phosphodiesterase 6B	Protein Coding	45	GC04P000587	3.02109	https://www.genecards.org/cgi-bin/carddisp.pl?gene=PDE6B
NEAT1	Nuclear Paraspeckle Assembly Transcript 1	RNA Gene	23	GC11P067093	3.01174	https://www.genecards.org/cgi-bin/carddisp.pl?gene=NEAT1
RBX1	Ring-Box 1	Protein Coding	42	GC22P040951	3.01161	https://www.genecards.org/cgi-bin/carddisp.pl?gene=RBX1
CDK1	Cyclin Dependent Kinase 1	Protein Coding	45	GC10P060772	3.00441	https://www.genecards.org/cgi-bin/carddisp.pl?gene=CDK1
CLCNKB	Chloride Voltage-Gated Channel Kb	Protein Coding	43	GC01P016043	3.00353	https://www.genecards.org/cgi-bin/carddisp.pl?gene=CLCNKB
MIF	Macrophage Migration Inhibitory Factor	Protein Coding	48	GC22P023894	2.99965	https://www.genecards.org/cgi-bin/carddisp.pl?gene=MIF
KAT5	Lysine Acetyltransferase 5	Protein Coding	46	GC11P065711	2.99885	https://www.genecards.org/cgi-bin/carddisp.pl?gene=KAT5
PRKAG3	Protein Kinase AMP-Activated Non-Catalytic Subunit Gamma 3	Protein Coding	42	GC02M218823	2.97603	https://www.genecards.org/cgi-bin/carddisp.pl?gene=PRKAG3
JUN	Jun Proto-Oncogene, AP-1 Transcription Factor Subunit	Protein Coding	48	GC01M058780	2.97125	https://www.genecards.org/cgi-bin/carddisp.pl?gene=JUN
HULC	Hepatocellular Carcinoma Up-Regulated Long Non-Coding RNA	RNA Gene	21	GC06P008438	2.96451	https://www.genecards.org/cgi-bin/carddisp.pl?gene=HULC
CTNNB1	Catenin Beta 1	Protein Coding	52	GC03P041236	2.95539	https://www.genecards.org/cgi-bin/carddisp.pl?gene=CTNNB1
TFPI	Tissue Factor Pathway Inhibitor	Protein Coding	43	GC02M187464	2.95069	https://www.genecards.org/cgi-bin/carddisp.pl?gene=TFPI
SREBF1	Sterol Regulatory Element Binding Transcription Factor 1	Protein Coding	45	GC17M017810	2.94714	https://www.genecards.org/cgi-bin/carddisp.pl?gene=SREBF1
CSNK1A1L	Casein Kinase 1 Alpha 1 Like	Protein Coding	37	GC13M037103	2.9341	https://www.genecards.org/cgi-bin/carddisp.pl?gene=CSNK1A1L
OPN3	Opsin 3	Protein Coding	39	GC01M241590	2.9264	https://www.genecards.org/cgi-bin/carddisp.pl?gene=OPN3
UBXN11	UBX Domain Protein 11	Protein Coding	36	GC01M026281	2.92028	https://www.genecards.org/cgi-bin/carddisp.pl?gene=UBXN11
DCLK1	Doublecortin Like Kinase 1	Protein Coding	43	GC13M035768	2.9169	https://www.genecards.org/cgi-bin/carddisp.pl?gene=DCLK1
SLC6A3	Solute Carrier Family 6 Member 3	Protein Coding	49	GC05M001392	2.91289	https://www.genecards.org/cgi-bin/carddisp.pl?gene=SLC6A3
NCAM1	Neural Cell Adhesion Molecule 1	Protein Coding	45	GC11P112961	2.9029	https://www.genecards.org/cgi-bin/carddisp.pl?gene=NCAM1
FBXL13	F-Box And Leucine Rich Repeat Protein 13	Protein Coding	35	GC07M102895	2.88002	https://www.genecards.org/cgi-bin/carddisp.pl?gene=FBXL13
HRAS	HRas Proto-Oncogene, GTPase	Protein Coding	50	GC11M001525	2.87477	https://www.genecards.org/cgi-bin/carddisp.pl?gene=HRAS
PRRT1	Proline Rich Transmembrane Protein 1	Protein Coding	33	GC06M051435	2.86538	https://www.genecards.org/cgi-bin/carddisp.pl?gene=PRRT1
HTR2C	5-Hydroxytryptamine Receptor 2C	Protein Coding	47	GC0XP114584	2.85618	https://www.genecards.org/cgi-bin/carddisp.pl?gene=HTR2C
TFF2	Trefoil Factor 2	Protein Coding	40	GC21M042346	2.85316	https://www.genecards.org/cgi-bin/carddisp.pl?gene=TFF2
CHRNB2	Cholinergic Receptor Nicotinic Beta 2 Subunit	Protein Coding	44	GC01P154568	2.80276	https://www.genecards.org/cgi-bin/carddisp.pl?gene=CHRNB2
PEX1	Peroxisomal Biogenesis Factor 1	Protein Coding	44	GC07M092487	2.80236	https://www.genecards.org/cgi-bin/carddisp.pl?gene=PEX1
TSPO	Translocator Protein	Protein Coding	42	GC22P043151	2.78496	https://www.genecards.org/cgi-bin/carddisp.pl?gene=TSPO
GNAQ	G Protein Subunit Alpha Q	Protein Coding	48	GC09M077716	2.77122	https://www.genecards.org/cgi-bin/carddisp.pl?gene=GNAQ
PIK3C2A	Phosphatidylinositol-4-Phosphate 3-Kinase Catalytic Subunit Type 2 Alpha	Protein Coding	46	GC11M017336	2.76767	https://www.genecards.org/cgi-bin/carddisp.pl?gene=PIK3C2A
KCNJ3	Potassium Inwardly Rectifying Channel Subfamily J Member 3	Protein Coding	45	GC02P154698	2.75113	https://www.genecards.org/cgi-bin/carddisp.pl?gene=KCNJ3
HTR2A	5-Hydroxytryptamine Receptor 2A	Protein Coding	47	GC13M046831	2.74978	https://www.genecards.org/cgi-bin/carddisp.pl?gene=HTR2A
KRAS	KRAS Proto-Oncogene, GTPase	Protein Coding	50	GC12M025204	2.71359	https://www.genecards.org/cgi-bin/carddisp.pl?gene=KRAS
HCRTR1	Hypocretin Receptor 1	Protein Coding	43	GC01P031587	2.70901	https://www.genecards.org/cgi-bin/carddisp.pl?gene=HCRTR1
SERPINA12	Serpin Family A Member 12	Protein Coding	37	GC14M097112	2.70844	https://www.genecards.org/cgi-bin/carddisp.pl?gene=SERPINA12
HSPD1	Heat Shock Protein Family D (Hsp60) Member 1	Protein Coding	46	GC02M197486	2.69806	https://www.genecards.org/cgi-bin/carddisp.pl?gene=HSPD1
HTR1B	5-Hydroxytryptamine Receptor 1B	Protein Coding	44	GC06M077478	2.68579	https://www.genecards.org/cgi-bin/carddisp.pl?gene=HTR1B
GLUL	Glutamate-Ammonia Ligase	Protein Coding	48	GC01M182378	2.68347	https://www.genecards.org/cgi-bin/carddisp.pl?gene=GLUL
TGFB1	Transforming Growth Factor Beta 1	Protein Coding	50	GC19M041301	2.68262	https://www.genecards.org/cgi-bin/carddisp.pl?gene=TGFB1
AVP	Arginine Vasopressin	Protein Coding	45	GC20M003082	2.68141	https://www.genecards.org/cgi-bin/carddisp.pl?gene=AVP
MTHFR	Methylenetetrahydrofolate Reductase	Protein Coding	48	GC01M011785	2.67911	https://www.genecards.org/cgi-bin/carddisp.pl?gene=MTHFR
MIR142	MicroRNA 142	RNA Gene	20	GC17M058331	2.67656	https://www.genecards.org/cgi-bin/carddisp.pl?gene=MIR142
PPP2CB	Protein Phosphatase 2 Catalytic Subunit Beta	Protein Coding	45	GC08M030762	2.67428	https://www.genecards.org/cgi-bin/carddisp.pl?gene=PPP2CB
RETN	Resistin	Protein Coding	42	GC19P007669	2.67246	https://www.genecards.org/cgi-bin/carddisp.pl?gene=RETN
CARTPT	CART Prepropeptide	Protein Coding	43	GC05P071719	2.66825	https://www.genecards.org/cgi-bin/carddisp.pl?gene=CARTPT
GNA11	G Protein Subunit Alpha 11	Protein Coding	47	GC19P003094	2.65795	https://www.genecards.org/cgi-bin/carddisp.pl?gene=GNA11
FGF23	Fibroblast Growth Factor 23	Protein Coding	44	GC12M004368	2.63877	https://www.genecards.org/cgi-bin/carddisp.pl?gene=FGF23
FGF21	Fibroblast Growth Factor 21	Protein Coding	38	GC19P048790	2.6378	https://www.genecards.org/cgi-bin/carddisp.pl?gene=FGF21
CACNA1S	Calcium Voltage-Gated Channel Subunit Alpha1 S	Protein Coding	48	GC01M201008	2.63308	https://www.genecards.org/cgi-bin/carddisp.pl?gene=CACNA1S
MIR96	MicroRNA 96	RNA Gene	20	GC07M129774	2.62487	https://www.genecards.org/cgi-bin/carddisp.pl?gene=MIR96
NPSR1	Neuropeptide S Receptor 1	Protein Coding	40	GC07P034664	2.62267	https://www.genecards.org/cgi-bin/carddisp.pl?gene=NPSR1
LMAN1	Lectin, Mannose Binding 1	Protein Coding	45	GC18M059327	2.62216	https://www.genecards.org/cgi-bin/carddisp.pl?gene=LMAN1
CSMD1	CUB And Sushi Multiple Domains 1	Protein Coding	37	GC08M002953	2.62216	https://www.genecards.org/cgi-bin/carddisp.pl?gene=CSMD1
SFTPD	Surfactant Protein D	Protein Coding	42	GC10M079937	2.61158	https://www.genecards.org/cgi-bin/carddisp.pl?gene=SFTPD
FOXO1	Forkhead Box O1	Protein Coding	47	GC13M040555	2.6091	https://www.genecards.org/cgi-bin/carddisp.pl?gene=FOXO1
HSPA1A	Heat Shock Protein Family A (Hsp70) Member 1A	Protein Coding	44	GC06P061188	2.6	https://www.genecards.org/cgi-bin/carddisp.pl?gene=HSPA1A
SIX3	SIX Homeobox 3	Protein Coding	42	GC02P044941	2.59321	https://www.genecards.org/cgi-bin/carddisp.pl?gene=SIX3
ACHE	Acetylcholinesterase (Cartwright Blood Group)	Protein Coding	45	GC07M100889	2.5861	https://www.genecards.org/cgi-bin/carddisp.pl?gene=ACHE
APOH	Apolipoprotein H	Protein Coding	42	GC17M066212	2.58363	https://www.genecards.org/cgi-bin/carddisp.pl?gene=APOH
GCH1	GTP Cyclohydrolase 1	Protein Coding	46	GC14M054842	2.56916	https://www.genecards.org/cgi-bin/carddisp.pl?gene=GCH1
KLK3	Kallikrein Related Peptidase 3	Protein Coding	45	GC19P050854	2.56595	https://www.genecards.org/cgi-bin/carddisp.pl?gene=KLK3
NMU	Neuromedin U	Protein Coding	38	GC04M055595	2.56515	https://www.genecards.org/cgi-bin/carddisp.pl?gene=NMU
MAOA	Monoamine Oxidase A	Protein Coding	49	GC0XP043654	2.56455	https://www.genecards.org/cgi-bin/carddisp.pl?gene=MAOA
TIMP3	TIMP Metallopeptidase Inhibitor 3	Protein Coding	45	GC22P032800	2.55901	https://www.genecards.org/cgi-bin/carddisp.pl?gene=TIMP3
NCOA3	Nuclear Receptor Coactivator 3	Protein Coding	45	GC20P047501	2.55472	https://www.genecards.org/cgi-bin/carddisp.pl?gene=NCOA3
CAT	Catalase	Protein Coding	48	GC11P034460	2.55269	https://www.genecards.org/cgi-bin/carddisp.pl?gene=CAT
CAD	Carbamoyl-Phosphate Synthetase 2, Aspartate Transcarbamylase, And Dihydroorotase	Protein Coding	49	GC02P027217	2.54963	https://www.genecards.org/cgi-bin/carddisp.pl?gene=CAD
RNASE3	Ribonuclease A Family Member 3	Protein Coding	40	GC14P020891	2.54346	https://www.genecards.org/cgi-bin/carddisp.pl?gene=RNASE3
CSF3	Colony Stimulating Factor 3	Protein Coding	38	GC17P040015	2.53641	https://www.genecards.org/cgi-bin/carddisp.pl?gene=CSF3
IFNA1	Interferon Alpha 1	Protein Coding	38	GC09P021543	2.53411	https://www.genecards.org/cgi-bin/carddisp.pl?gene=IFNA1
PYY	Peptide YY	Protein Coding	42	GC17M043952	2.52617	https://www.genecards.org/cgi-bin/carddisp.pl?gene=PYY
PSEN1	Presenilin 1	Protein Coding	51	GC14P073136	2.52154	https://www.genecards.org/cgi-bin/carddisp.pl?gene=PSEN1
FHIT	Fragile Histidine Triad Diadenosine Triphosphatase	Protein Coding	43	GC03M059747	2.52041	https://www.genecards.org/cgi-bin/carddisp.pl?gene=FHIT
GAST	Gastrin	Protein Coding	40	GC17P041712	2.52041	https://www.genecards.org/cgi-bin/carddisp.pl?gene=GAST
TNFRSF11B	TNF Receptor Superfamily Member 11b	Protein Coding	46	GC08M118923	2.51822	https://www.genecards.org/cgi-bin/carddisp.pl?gene=TNFRSF11B
SERPINF2	Serpin Family F Member 2	Protein Coding	43	GC17P001742	2.50773	https://www.genecards.org/cgi-bin/carddisp.pl?gene=SERPINF2
BVES	Blood Vessel Epicardial Substance	Protein Coding	40	GC06M105096	2.50514	https://www.genecards.org/cgi-bin/carddisp.pl?gene=BVES
THBD	Thrombomodulin	Protein Coding	43	GC20M023026	2.50036	https://www.genecards.org/cgi-bin/carddisp.pl?gene=THBD
HRH1	Histamine Receptor H1	Protein Coding	45	GC03P011287	2.50008	https://www.genecards.org/cgi-bin/carddisp.pl?gene=HRH1
TMPO	Thymopoietin	Protein Coding	44	GC12P098515	2.49517	https://www.genecards.org/cgi-bin/carddisp.pl?gene=TMPO
PTGDS	Prostaglandin D2 Synthase	Protein Coding	44	GC09P137026	2.49271	https://www.genecards.org/cgi-bin/carddisp.pl?gene=PTGDS
ITGA2B	Integrin Subunit Alpha 2b	Protein Coding	50	GC17M044509	2.49197	https://www.genecards.org/cgi-bin/carddisp.pl?gene=ITGA2B
SNCA	Synuclein Alpha	Protein Coding	48	GC04M089724	2.47919	https://www.genecards.org/cgi-bin/carddisp.pl?gene=SNCA
KCNC2	Potassium Voltage-Gated Channel Subfamily C Member 2	Protein Coding	40	GC12M075040	2.47012	https://www.genecards.org/cgi-bin/carddisp.pl?gene=KCNC2
MFSD2B	Major Facilitator Superfamily Domain Containing 2B	Protein Coding	32	GC02P024010	2.4653	https://www.genecards.org/cgi-bin/carddisp.pl?gene=MFSD2B
MIR183	MicroRNA 183	RNA Gene	18	GC07M129805	2.45083	https://www.genecards.org/cgi-bin/carddisp.pl?gene=MIR183
LGALS3	Galectin 3	Protein Coding	43	GC14P055124	2.43095	https://www.genecards.org/cgi-bin/carddisp.pl?gene=LGALS3
TYMS	Thymidylate Synthetase	Protein Coding	46	GC18P000657	2.42921	https://www.genecards.org/cgi-bin/carddisp.pl?gene=TYMS
TERT	Telomerase Reverse Transcriptase	Protein Coding	50	GC05M001253	2.41314	https://www.genecards.org/cgi-bin/carddisp.pl?gene=TERT
PCSK9	Proprotein Convertase Subtilisin/Kexin Type 9	Protein Coding	49	GC01P055039	2.4069	https://www.genecards.org/cgi-bin/carddisp.pl?gene=PCSK9
ATR	ATR Serine/Threonine Kinase	Protein Coding	52	GC03M142449	2.39615	https://www.genecards.org/cgi-bin/carddisp.pl?gene=ATR
NPY1R	Neuropeptide Y Receptor Y1	Protein Coding	45	GC04M163323	2.39511	https://www.genecards.org/cgi-bin/carddisp.pl?gene=NPY1R
APOA1	Apolipoprotein A1	Protein Coding	48	GC11M116835	2.39371	https://www.genecards.org/cgi-bin/carddisp.pl?gene=APOA1
RGS16	Regulator Of G Protein Signaling 16	Protein Coding	38	GC01M182598	2.39276	https://www.genecards.org/cgi-bin/carddisp.pl?gene=RGS16
STX1A	Syntaxin 1A	Protein Coding	46	GC07M073700	2.39256	https://www.genecards.org/cgi-bin/carddisp.pl?gene=STX1A
SFTPC	Surfactant Protein C	Protein Coding	43	GC08P022156	2.39018	https://www.genecards.org/cgi-bin/carddisp.pl?gene=SFTPC
GSR	Glutathione-Disulfide Reductase	Protein Coding	48	GC08M030678	2.38117	https://www.genecards.org/cgi-bin/carddisp.pl?gene=GSR
IFNAR2	Interferon Alpha And Beta Receptor Subunit 2	Protein Coding	48	GC21P033229	2.37543	https://www.genecards.org/cgi-bin/carddisp.pl?gene=IFNAR2
CDK4	Cyclin Dependent Kinase 4	Protein Coding	52	GC12M057743	2.37338	https://www.genecards.org/cgi-bin/carddisp.pl?gene=CDK4
KCNJ12	Potassium Inwardly Rectifying Channel Subfamily J Member 12	Protein Coding	42	GC17P031547	2.3715	https://www.genecards.org/cgi-bin/carddisp.pl?gene=KCNJ12
PIK3R1	Phosphoinositide-3-Kinase Regulatory Subunit 1	Protein Coding	50	GC05P068215	2.3649	https://www.genecards.org/cgi-bin/carddisp.pl?gene=PIK3R1
LEPR	Leptin Receptor	Protein Coding	48	GC01P065421	2.3632	https://www.genecards.org/cgi-bin/carddisp.pl?gene=LEPR
MIR181A1	MicroRNA 181a-1	RNA Gene	19	GC01M198860	2.35709	https://www.genecards.org/cgi-bin/carddisp.pl?gene=MIR181A1
CHRNA4	Cholinergic Receptor Nicotinic Alpha 4 Subunit	Protein Coding	48	GC20M063343	2.35479	https://www.genecards.org/cgi-bin/carddisp.pl?gene=CHRNA4
PRKAB1	Protein Kinase AMP-Activated Non-Catalytic Subunit Beta 1	Protein Coding	46	GC12P119632	2.35274	https://www.genecards.org/cgi-bin/carddisp.pl?gene=PRKAB1
ID1	Inhibitor Of DNA Binding 1, HLH Protein	Protein Coding	42	GC20P031605	2.34757	https://www.genecards.org/cgi-bin/carddisp.pl?gene=ID1
TAC1	Tachykinin Precursor 1	Protein Coding	42	GC07P097731	2.34625	https://www.genecards.org/cgi-bin/carddisp.pl?gene=TAC1
TPH2	Tryptophan Hydroxylase 2	Protein Coding	47	GC12P071938	2.33958	https://www.genecards.org/cgi-bin/carddisp.pl?gene=TPH2
RPE65	Retinoid Isomerohydrolase RPE65	Protein Coding	44	GC01M068428	2.32706	https://www.genecards.org/cgi-bin/carddisp.pl?gene=RPE65
CASR	Calcium Sensing Receptor	Protein Coding	49	GC03P122183	2.32154	https://www.genecards.org/cgi-bin/carddisp.pl?gene=CASR
HNRNPK	Heterogeneous Nuclear Ribonucleoprotein K	Protein Coding	45	GC09M087363	2.31904	https://www.genecards.org/cgi-bin/carddisp.pl?gene=HNRNPK
ARRB1	Arrestin Beta 1	Protein Coding	42	GC11M076273	2.31491	https://www.genecards.org/cgi-bin/carddisp.pl?gene=ARRB1
MAPT	Microtubule Associated Protein Tau	Protein Coding	49	GC17P045894	2.31188	https://www.genecards.org/cgi-bin/carddisp.pl?gene=MAPT
CP	Ceruloplasmin	Protein Coding	47	GC03M149162	2.30877	https://www.genecards.org/cgi-bin/carddisp.pl?gene=CP
BMP2	Bone Morphogenetic Protein 2	Protein Coding	45	GC20P006696	2.30738	https://www.genecards.org/cgi-bin/carddisp.pl?gene=BMP2
NTRK1	Neurotrophic Receptor Tyrosine Kinase 1	Protein Coding	48	GC01P156815	2.3062	https://www.genecards.org/cgi-bin/carddisp.pl?gene=NTRK1
PROK1	Prokineticin 1	Protein Coding	35	GC01P110451	2.3062	https://www.genecards.org/cgi-bin/carddisp.pl?gene=PROK1
NDN	Necdin, MAGE Family Member	Protein Coding	41	GC15M023686	2.30191	https://www.genecards.org/cgi-bin/carddisp.pl?gene=NDN
TAB2	TGF-Beta Activated Kinase 1 (MAP3K7) Binding Protein 2	Protein Coding	46	GC06P149218	2.29679	https://www.genecards.org/cgi-bin/carddisp.pl?gene=TAB2
RRAS2	RAS Related 2	Protein Coding	45	GC11M014299	2.29139	https://www.genecards.org/cgi-bin/carddisp.pl?gene=RRAS2
DDC	Dopa Decarboxylase	Protein Coding	51	GC07M050458	2.28861	https://www.genecards.org/cgi-bin/carddisp.pl?gene=DDC
DAXX	Death Domain Associated Protein	Protein Coding	43	GC06M033318	2.28736	https://www.genecards.org/cgi-bin/carddisp.pl?gene=DAXX
EFEMP2	EGF Containing Fibulin Extracellular Matrix Protein 2	Protein Coding	42	GC11M074531	2.28736	https://www.genecards.org/cgi-bin/carddisp.pl?gene=EFEMP2
NGF	Nerve Growth Factor	Protein Coding	49	GC01M115285	2.28292	https://www.genecards.org/cgi-bin/carddisp.pl?gene=NGF
B2M	Beta-2-Microglobulin	Protein Coding	47	GC15P044711	2.2817	https://www.genecards.org/cgi-bin/carddisp.pl?gene=B2M
ELK1	ETS Transcription Factor ELK1	Protein Coding	43	GC0XM047635	2.27493	https://www.genecards.org/cgi-bin/carddisp.pl?gene=ELK1
CEBPA	CCAAT Enhancer Binding Protein Alpha	Protein Coding	46	GC19M033299	2.27195	https://www.genecards.org/cgi-bin/carddisp.pl?gene=CEBPA
EPX	Eosinophil Peroxidase	Protein Coding	42	GC17P058192	2.27006	https://www.genecards.org/cgi-bin/carddisp.pl?gene=EPX
CXCL8	C-X-C Motif Chemokine Ligand 8	Protein Coding	40	GC04P073740	2.26352	https://www.genecards.org/cgi-bin/carddisp.pl?gene=CXCL8
YWHAZ	Tyrosine 3-Monooxygenase/Tryptophan 5-Monooxygenase Activation Protein Zeta	Protein Coding	46	GC08M100917	2.2599	https://www.genecards.org/cgi-bin/carddisp.pl?gene=YWHAZ
IL3	Interleukin 3	Protein Coding	42	GC05P132060	2.25633	https://www.genecards.org/cgi-bin/carddisp.pl?gene=IL3
APLN	Apelin	Protein Coding	36	GC0XM129645	2.25367	https://www.genecards.org/cgi-bin/carddisp.pl?gene=APLN
TXN	Thioredoxin	Protein Coding	45	GC09M110243	2.25136	https://www.genecards.org/cgi-bin/carddisp.pl?gene=TXN
KCNJ4	Potassium Inwardly Rectifying Channel Subfamily J Member 4	Protein Coding	44	GC22M038426	2.24993	https://www.genecards.org/cgi-bin/carddisp.pl?gene=KCNJ4
BSCL2	BSCL2 Lipid Droplet Biogenesis Associated, Seipin	Protein Coding	41	GC11M074348	2.24954	https://www.genecards.org/cgi-bin/carddisp.pl?gene=BSCL2
PRKAG1	Protein Kinase AMP-Activated Non-Catalytic Subunit Gamma 1	Protein Coding	47	GC12M049002	2.24771	https://www.genecards.org/cgi-bin/carddisp.pl?gene=PRKAG1
PRKAB2	Protein Kinase AMP-Activated Non-Catalytic Subunit Beta 2	Protein Coding	45	GC01M147155	2.24771	https://www.genecards.org/cgi-bin/carddisp.pl?gene=PRKAB2
HSD3BP4	Hydroxy-Delta-5-Steroid Dehydrogenase, 3 Beta, Pseudogene 4	Pseudogene	12	GC01P119563	2.24765	https://www.genecards.org/cgi-bin/carddisp.pl?gene=HSD3BP4
PIK3CG	Phosphatidylinositol-4,5-Bisphosphate 3-Kinase Catalytic Subunit Gamma	Protein Coding	48	GC07P106865	2.24657	https://www.genecards.org/cgi-bin/carddisp.pl?gene=PIK3CG
HTR5A	5-Hydroxytryptamine Receptor 5A	Protein Coding	42	GC07P155070	2.23573	https://www.genecards.org/cgi-bin/carddisp.pl?gene=HTR5A
GABBR1	Gamma-Aminobutyric Acid Type B Receptor Subunit 1	Protein Coding	46	GC06M029555	2.23291	https://www.genecards.org/cgi-bin/carddisp.pl?gene=GABBR1
LEMD2	LEM Domain Nuclear Envelope Protein 2	Protein Coding	38	GC06M051538	2.22768	https://www.genecards.org/cgi-bin/carddisp.pl?gene=LEMD2
SLC6A1	Solute Carrier Family 6 Member 1	Protein Coding	47	GC03P011285	2.22566	https://www.genecards.org/cgi-bin/carddisp.pl?gene=SLC6A1
CRHR1	Corticotropin Releasing Hormone Receptor 1	Protein Coding	44	GC17P045784	2.22422	https://www.genecards.org/cgi-bin/carddisp.pl?gene=CRHR1
ANK3	Ankyrin 3	Protein Coding	42	GC10M060026	2.22293	https://www.genecards.org/cgi-bin/carddisp.pl?gene=ANK3
ADRB2	Adrenoceptor Beta 2	Protein Coding	49	GC05P148825	2.22101	https://www.genecards.org/cgi-bin/carddisp.pl?gene=ADRB2
NR1H3	Nuclear Receptor Subfamily 1 Group H Member 3	Protein Coding	46	GC11P047248	2.21921	https://www.genecards.org/cgi-bin/carddisp.pl?gene=NR1H3
GAPDH	Glyceraldehyde-3-Phosphate Dehydrogenase	Protein Coding	47	GC12P014190	2.21333	https://www.genecards.org/cgi-bin/carddisp.pl?gene=GAPDH
YTHDF2	YTH N6-Methyladenosine RNA Binding Protein 2	Protein Coding	38	GC01P028751	2.2101	https://www.genecards.org/cgi-bin/carddisp.pl?gene=YTHDF2
KISS1	KiSS-1 Metastasis Suppressor	Protein Coding	41	GC01M204190	2.20937	https://www.genecards.org/cgi-bin/carddisp.pl?gene=KISS1
IGF2	Insulin Like Growth Factor 2	Protein Coding	46	GC11M002130	2.20655	https://www.genecards.org/cgi-bin/carddisp.pl?gene=IGF2
KCNJ18	Potassium Inwardly Rectifying Channel Subfamily J Member 18	Protein Coding	26	GC17P031963	2.20369	https://www.genecards.org/cgi-bin/carddisp.pl?gene=KCNJ18
SGCB	Sarcoglycan Beta	Protein Coding	40	GC04M052019	2.19823	https://www.genecards.org/cgi-bin/carddisp.pl?gene=SGCB
CHKA	Choline Kinase Alpha	Protein Coding	41	GC11M068052	2.19136	https://www.genecards.org/cgi-bin/carddisp.pl?gene=CHKA
PRKCB	Protein Kinase C Beta	Protein Coding	47	GC16P024020	2.1913	https://www.genecards.org/cgi-bin/carddisp.pl?gene=PRKCB
HEBP1	Heme Binding Protein 1	Protein Coding	34	GC12M012974	2.19101	https://www.genecards.org/cgi-bin/carddisp.pl?gene=HEBP1
TGFB2	Transforming Growth Factor Beta 2	Protein Coding	49	GC01P218345	2.19051	https://www.genecards.org/cgi-bin/carddisp.pl?gene=TGFB2
GRIA2	Glutamate Ionotropic Receptor AMPA Type Subunit 2	Protein Coding	49	GC04P157204	2.19047	https://www.genecards.org/cgi-bin/carddisp.pl?gene=GRIA2
OXT	Oxytocin/Neurophysin I Prepropeptide	Protein Coding	40	GC20P003068	2.18921	https://www.genecards.org/cgi-bin/carddisp.pl?gene=OXT
GNAO1	G Protein Subunit Alpha O1	Protein Coding	48	GC16P056231	2.18726	https://www.genecards.org/cgi-bin/carddisp.pl?gene=GNAO1
ADCY8	Adenylate Cyclase 8	Protein Coding	44	GC08M130780	2.18726	https://www.genecards.org/cgi-bin/carddisp.pl?gene=ADCY8
ERC2	ELKS/RAB6-Interacting/CAST Family Member 2	Protein Coding	37	GC03M055509	2.18726	https://www.genecards.org/cgi-bin/carddisp.pl?gene=ERC2
BTNL2	Butyrophilin Like 2	Protein Coding	38	GC06M032393	2.1856	https://www.genecards.org/cgi-bin/carddisp.pl?gene=BTNL2
GC	GC Vitamin D Binding Protein	Protein Coding	42	GC04M071741	2.17431	https://www.genecards.org/cgi-bin/carddisp.pl?gene=GC
CYP3A4	Cytochrome P450 Family 3 Subfamily A Member 4	Protein Coding	50	GC07M099759	2.1687	https://www.genecards.org/cgi-bin/carddisp.pl?gene=CYP3A4
ADCYAP1R1	ADCYAP Receptor Type I	Protein Coding	45	GC07P031058	2.16317	https://www.genecards.org/cgi-bin/carddisp.pl?gene=ADCYAP1R1
AKT3	AKT Serine/Threonine Kinase 3	Protein Coding	52	GC01M243488	2.16004	https://www.genecards.org/cgi-bin/carddisp.pl?gene=AKT3
RXRA	Retinoid X Receptor Alpha	Protein Coding	49	GC09P134317	2.14988	https://www.genecards.org/cgi-bin/carddisp.pl?gene=RXRA
MT1F	Metallothionein 1F	Protein Coding	37	GC16P056657	2.13499	https://www.genecards.org/cgi-bin/carddisp.pl?gene=MT1F
TAT	Tyrosine Aminotransferase	Protein Coding	44	GC16M071565	2.12901	https://www.genecards.org/cgi-bin/carddisp.pl?gene=TAT
MIR133A1	MicroRNA 133a-1	RNA Gene	18	GC18M021826	2.12472	https://www.genecards.org/cgi-bin/carddisp.pl?gene=MIR133A1
MEN1	Menin 1	Protein Coding	45	GC11M064803	2.12163	https://www.genecards.org/cgi-bin/carddisp.pl?gene=MEN1
GSK3A	Glycogen Synthase Kinase 3 Alpha	Protein Coding	48	GC19M051225	2.11968	https://www.genecards.org/cgi-bin/carddisp.pl?gene=GSK3A
CYP2C19	Cytochrome P450 Family 2 Subfamily C Member 19	Protein Coding	48	GC10P094762	2.11452	https://www.genecards.org/cgi-bin/carddisp.pl?gene=CYP2C19
CHAT	Choline O-Acetyltransferase	Protein Coding	46	GC10P049609	2.11198	https://www.genecards.org/cgi-bin/carddisp.pl?gene=CHAT
SELE	Selectin E	Protein Coding	42	GC01M169722	2.11033	https://www.genecards.org/cgi-bin/carddisp.pl?gene=SELE
PTPA	Protein Phosphatase 2 Phosphatase Activator	Protein Coding	34	GC09P129111	2.10982	https://www.genecards.org/cgi-bin/carddisp.pl?gene=PTPA
ANP32A	Acidic Nuclear Phosphoprotein 32 Family Member A	Protein Coding	42	GC15M068778	2.1053	https://www.genecards.org/cgi-bin/carddisp.pl?gene=ANP32A
NR1I3	Nuclear Receptor Subfamily 1 Group I Member 3	Protein Coding	44	GC01M161229	2.10185	https://www.genecards.org/cgi-bin/carddisp.pl?gene=NR1I3
HNRNPR	Heterogeneous Nuclear Ribonucleoprotein R	Protein Coding	39	GC01M023303	2.099	https://www.genecards.org/cgi-bin/carddisp.pl?gene=HNRNPR
PIWIL1	Piwi Like RNA-Mediated Gene Silencing 1	Protein Coding	40	GC12P130337	2.08598	https://www.genecards.org/cgi-bin/carddisp.pl?gene=PIWIL1
ATF1	Activating Transcription Factor 1	Protein Coding	45	GC12P050763	2.08456	https://www.genecards.org/cgi-bin/carddisp.pl?gene=ATF1
CCL2	C-C Motif Chemokine Ligand 2	Protein Coding	48	GC17P034255	2.08347	https://www.genecards.org/cgi-bin/carddisp.pl?gene=CCL2
KITLG	KIT Ligand	Protein Coding	43	GC12M088492	2.08262	https://www.genecards.org/cgi-bin/carddisp.pl?gene=KITLG
SLC41A1	Solute Carrier Family 41 Member 1	Protein Coding	37	GC01M205789	2.08258	https://www.genecards.org/cgi-bin/carddisp.pl?gene=SLC41A1
PPOX	Protoporphyrinogen Oxidase	Protein Coding	43	GC01P161222	2.08136	https://www.genecards.org/cgi-bin/carddisp.pl?gene=PPOX
CDKN1A	Cyclin Dependent Kinase Inhibitor 1A	Protein Coding	48	GC06P061315	2.07896	https://www.genecards.org/cgi-bin/carddisp.pl?gene=CDKN1A
GTPBP1	GTP Binding Protein 1	Protein Coding	38	GC22P038705	2.06742	https://www.genecards.org/cgi-bin/carddisp.pl?gene=GTPBP1
GNAI2	G Protein Subunit Alpha I2	Protein Coding	46	GC03P050226	2.06649	https://www.genecards.org/cgi-bin/carddisp.pl?gene=GNAI2
PSMC4	Proteasome 26S Subunit, ATPase 4	Protein Coding	40	GC19P042602	2.06605	https://www.genecards.org/cgi-bin/carddisp.pl?gene=PSMC4
RACK1	Receptor For Activated C Kinase 1	Protein Coding	36	GC05M181440	2.06015	https://www.genecards.org/cgi-bin/carddisp.pl?gene=RACK1
PPY	Pancreatic Polypeptide	Protein Coding	40	GC17M043940	2.0561	https://www.genecards.org/cgi-bin/carddisp.pl?gene=PPY
CALCA	Calcitonin Related Polypeptide Alpha	Protein Coding	42	GC11M014945	2.05194	https://www.genecards.org/cgi-bin/carddisp.pl?gene=CALCA
IL1RN	Interleukin 1 Receptor Antagonist	Protein Coding	47	GC02P118067	2.04653	https://www.genecards.org/cgi-bin/carddisp.pl?gene=IL1RN
CDK5	Cyclin Dependent Kinase 5	Protein Coding	52	GC07M151053	2.04472	https://www.genecards.org/cgi-bin/carddisp.pl?gene=CDK5
PPP2R1A	Protein Phosphatase 2 Scaffold Subunit Aalpha	Protein Coding	46	GC19P052189	2.04266	https://www.genecards.org/cgi-bin/carddisp.pl?gene=PPP2R1A
PPP2R1B	Protein Phosphatase 2 Scaffold Subunit Abeta	Protein Coding	46	GC11M111695	2.04266	https://www.genecards.org/cgi-bin/carddisp.pl?gene=PPP2R1B
MAX	MYC Associated Factor X	Protein Coding	46	GC14M065011	2.03958	https://www.genecards.org/cgi-bin/carddisp.pl?gene=MAX
MIR21	MicroRNA 21	RNA Gene	24	GC17P059841	2.03707	https://www.genecards.org/cgi-bin/carddisp.pl?gene=MIR21
GBA	Glucosylceramidase Beta	Protein Coding	46	GC01M155234	2.01809	https://www.genecards.org/cgi-bin/carddisp.pl?gene=GBA
GRM1	Glutamate Metabotropic Receptor 1	Protein Coding	50	GC06P145973	2.0134	https://www.genecards.org/cgi-bin/carddisp.pl?gene=GRM1
MTTP	Microsomal Triglyceride Transfer Protein	Protein Coding	44	GC04P099563	2.00921	https://www.genecards.org/cgi-bin/carddisp.pl?gene=MTTP
PAX4	Paired Box 4	Protein Coding	43	GC07M127610	2.00921	https://www.genecards.org/cgi-bin/carddisp.pl?gene=PAX4
CLDN4	Claudin 4	Protein Coding	41	GC07P073799	2.00921	https://www.genecards.org/cgi-bin/carddisp.pl?gene=CLDN4
ATF5	Activating Transcription Factor 5	Protein Coding	36	GC19P049931	2.00921	https://www.genecards.org/cgi-bin/carddisp.pl?gene=ATF5
CYP2D6	Cytochrome P450 Family 2 Subfamily D Member 6	Protein Coding	48	GC22M042126	2.00615	https://www.genecards.org/cgi-bin/carddisp.pl?gene=CYP2D6
USP30	Ubiquitin Specific Peptidase 30	Protein Coding	39	GC12P109027	2.00568	https://www.genecards.org/cgi-bin/carddisp.pl?gene=USP30
ACADS	Acyl-CoA Dehydrogenase Short Chain	Protein Coding	45	GC12P120976	2.00198	https://www.genecards.org/cgi-bin/carddisp.pl?gene=ACADS
GLO1	Glyoxalase I	Protein Coding	45	GC06M051573	2.00198	https://www.genecards.org/cgi-bin/carddisp.pl?gene=GLO1
FDFT1	Farnesyl-Diphosphate Farnesyltransferase 1	Protein Coding	44	GC08P011795	2.00198	https://www.genecards.org/cgi-bin/carddisp.pl?gene=FDFT1
RPSA	Ribosomal Protein SA	Protein Coding	44	GC03P039406	1.99369	https://www.genecards.org/cgi-bin/carddisp.pl?gene=RPSA
FNDC5	Fibronectin Type III Domain Containing 5	Protein Coding	33	GC01M032886	1.99359	https://www.genecards.org/cgi-bin/carddisp.pl?gene=FNDC5
HADHB	Hydroxyacyl-CoA Dehydrogenase Trifunctional Multienzyme Complex Subunit Beta	Protein Coding	46	GC02P026243	1.9903	https://www.genecards.org/cgi-bin/carddisp.pl?gene=HADHB
GZMB	Granzyme B	Protein Coding	45	GC14M024630	1.98883	https://www.genecards.org/cgi-bin/carddisp.pl?gene=GZMB
GDNF	Glial Cell Derived Neurotrophic Factor	Protein Coding	46	GC05M037812	1.98118	https://www.genecards.org/cgi-bin/carddisp.pl?gene=GDNF
NFKB1	Nuclear Factor Kappa B Subunit 1	Protein Coding	51	GC04P102501	1.97662	https://www.genecards.org/cgi-bin/carddisp.pl?gene=NFKB1
ABCB1	ATP Binding Cassette Subfamily B Member 1	Protein Coding	50	GC07M087504	1.97594	https://www.genecards.org/cgi-bin/carddisp.pl?gene=ABCB1
MMP2	Matrix Metallopeptidase 2	Protein Coding	52	GC16P055390	1.97142	https://www.genecards.org/cgi-bin/carddisp.pl?gene=MMP2
ZNF704	Zinc Finger Protein 704	Protein Coding	31	GC08M080628	1.96217	https://www.genecards.org/cgi-bin/carddisp.pl?gene=ZNF704
NPPC	Natriuretic Peptide C	Protein Coding	40	GC02M231921	1.96185	https://www.genecards.org/cgi-bin/carddisp.pl?gene=NPPC
RAD21	RAD21 Cohesin Complex Component	Protein Coding	45	GC08M116846	1.96017	https://www.genecards.org/cgi-bin/carddisp.pl?gene=RAD21
SMC3	Structural Maintenance Of Chromosomes 3	Protein Coding	45	GC10P110567	1.96017	https://www.genecards.org/cgi-bin/carddisp.pl?gene=SMC3
WAPL	WAPL Cohesin Release Factor	Protein Coding	31	GC10M086436	1.96017	https://www.genecards.org/cgi-bin/carddisp.pl?gene=WAPL
HSPA8	Heat Shock Protein Family A (Hsp70) Member 8	Protein Coding	46	GC11M123057	1.95826	https://www.genecards.org/cgi-bin/carddisp.pl?gene=HSPA8
TNRC6B	Trinucleotide Repeat Containing Adaptor 6B	Protein Coding	37	GC22P040044	1.95614	https://www.genecards.org/cgi-bin/carddisp.pl?gene=TNRC6B
HSP90AA1	Heat Shock Protein 90 Alpha Family Class A Member 1	Protein Coding	46	GC14M102080	1.95447	https://www.genecards.org/cgi-bin/carddisp.pl?gene=HSP90AA1
CACNA1B	Calcium Voltage-Gated Channel Subunit Alpha1 B	Protein Coding	48	GC09P137877	1.95367	https://www.genecards.org/cgi-bin/carddisp.pl?gene=CACNA1B
CBL	Cbl Proto-Oncogene	Protein Coding	49	GC11P119206	1.95085	https://www.genecards.org/cgi-bin/carddisp.pl?gene=CBL
CHD2	Chromodomain Helicase DNA Binding Protein 2	Protein Coding	44	GC15P092900	1.94911	https://www.genecards.org/cgi-bin/carddisp.pl?gene=CHD2
ATP5F1D	ATP Synthase F1 Subunit Delta	Protein Coding	34	GC19P001250	1.94911	https://www.genecards.org/cgi-bin/carddisp.pl?gene=ATP5F1D
EIF2AK3	Eukaryotic Translation Initiation Factor 2 Alpha Kinase 3	Protein Coding	48	GC02M088556	1.94636	https://www.genecards.org/cgi-bin/carddisp.pl?gene=EIF2AK3
TRH	Thyrotropin Releasing Hormone	Protein Coding	41	GC03P129974	1.9463	https://www.genecards.org/cgi-bin/carddisp.pl?gene=TRH
UTS2	Urotensin 2	Protein Coding	41	GC01M007843	1.94373	https://www.genecards.org/cgi-bin/carddisp.pl?gene=UTS2
GCK	Glucokinase	Protein Coding	49	GC07M044228	1.94223	https://www.genecards.org/cgi-bin/carddisp.pl?gene=GCK
LBR	Lamin B Receptor	Protein Coding	47	GC01M225401	1.9386	https://www.genecards.org/cgi-bin/carddisp.pl?gene=LBR
CRX	Cone-Rod Homeobox	Protein Coding	42	GC19P047819	1.93779	https://www.genecards.org/cgi-bin/carddisp.pl?gene=CRX
CCNE1	Cyclin E1	Protein Coding	48	GC19P029811	1.93405	https://www.genecards.org/cgi-bin/carddisp.pl?gene=CCNE1
SDHA	Succinate Dehydrogenase Complex Flavoprotein Subunit A	Protein Coding	47	GC05P000208	1.92442	https://www.genecards.org/cgi-bin/carddisp.pl?gene=SDHA
MIR483	MicroRNA 483	RNA Gene	19	GC11M002237	1.92365	https://www.genecards.org/cgi-bin/carddisp.pl?gene=MIR483
CD40	CD40 Molecule	Protein Coding	46	GC20P046118	1.92296	https://www.genecards.org/cgi-bin/carddisp.pl?gene=CD40
FAS	Fas Cell Surface Death Receptor	Protein Coding	49	GC10P088969	1.90991	https://www.genecards.org/cgi-bin/carddisp.pl?gene=FAS
CPNE8	Copine 8	Protein Coding	34	GC12M038646	1.90867	https://www.genecards.org/cgi-bin/carddisp.pl?gene=CPNE8
ELN	Elastin	Protein Coding	44	GC07P074027	1.90602	https://www.genecards.org/cgi-bin/carddisp.pl?gene=ELN
TNPO1	Transportin 1	Protein Coding	40	GC05P072816	1.90431	https://www.genecards.org/cgi-bin/carddisp.pl?gene=TNPO1
MMP3	Matrix Metallopeptidase 3	Protein Coding	50	GC11M102835	1.90298	https://www.genecards.org/cgi-bin/carddisp.pl?gene=MMP3
ALPP	Alkaline Phosphatase, Placental	Protein Coding	45	GC02P232378	1.90017	https://www.genecards.org/cgi-bin/carddisp.pl?gene=ALPP
CDKN2A	Cyclin Dependent Kinase Inhibitor 2A	Protein Coding	50	GC09M021967	1.89296	https://www.genecards.org/cgi-bin/carddisp.pl?gene=CDKN2A
CYP11B2	Cytochrome P450 Family 11 Subfamily B Member 2	Protein Coding	46	GC08M142910	1.89271	https://www.genecards.org/cgi-bin/carddisp.pl?gene=CYP11B2
MAPK14	Mitogen-Activated Protein Kinase 14	Protein Coding	50	GC06P061307	1.89219	https://www.genecards.org/cgi-bin/carddisp.pl?gene=MAPK14
RRH	Retinal Pigment Epithelium-Derived Rhodopsin Homolog	Protein Coding	35	GC04P109827	1.88928	https://www.genecards.org/cgi-bin/carddisp.pl?gene=RRH
NMUR1	Neuromedin U Receptor 1	Protein Coding	40	GC02M231735	1.88857	https://www.genecards.org/cgi-bin/carddisp.pl?gene=NMUR1
NMUR2	Neuromedin U Receptor 2	Protein Coding	38	GC05M152391	1.88857	https://www.genecards.org/cgi-bin/carddisp.pl?gene=NMUR2
AHCY	Adenosylhomocysteinase	Protein Coding	49	GC20M034379	1.88672	https://www.genecards.org/cgi-bin/carddisp.pl?gene=AHCY
MEF2A	Myocyte Enhancer Factor 2A	Protein Coding	46	GC15P099565	1.8863	https://www.genecards.org/cgi-bin/carddisp.pl?gene=MEF2A
GIP	Gastric Inhibitory Polypeptide	Protein Coding	38	GC17M048958	1.8846	https://www.genecards.org/cgi-bin/carddisp.pl?gene=GIP
PNPLA3	Patatin Like Phospholipase Domain Containing 3	Protein Coding	40	GC22P043923	1.88458	https://www.genecards.org/cgi-bin/carddisp.pl?gene=PNPLA3
TDRKH	Tudor And KH Domain Containing	Protein Coding	38	GC01M151833	1.87822	https://www.genecards.org/cgi-bin/carddisp.pl?gene=TDRKH
GDF15	Growth Differentiation Factor 15	Protein Coding	41	GC19P029039	1.87651	https://www.genecards.org/cgi-bin/carddisp.pl?gene=GDF15
RFX4	Regulatory Factor X4	Protein Coding	35	GC12P106583	1.87317	https://www.genecards.org/cgi-bin/carddisp.pl?gene=RFX4
IGFBP2	Insulin Like Growth Factor Binding Protein 2	Protein Coding	42	GC02P216632	1.8645	https://www.genecards.org/cgi-bin/carddisp.pl?gene=IGFBP2
RCE1	Ras Converting CAAX Endopeptidase 1	Protein Coding	38	GC11P066842	1.86352	https://www.genecards.org/cgi-bin/carddisp.pl?gene=RCE1
MLIP	Muscular LMNA Interacting Protein	Protein Coding	32	GC06P053929	1.86352	https://www.genecards.org/cgi-bin/carddisp.pl?gene=MLIP
TSC22D3	TSC22 Domain Family Member 3	Protein Coding	38	GC0XM107713	1.86284	https://www.genecards.org/cgi-bin/carddisp.pl?gene=TSC22D3
PDE4D	Phosphodiesterase 4D	Protein Coding	48	GC05M058969	1.857	https://www.genecards.org/cgi-bin/carddisp.pl?gene=PDE4D
EYA1	EYA Transcriptional Coactivator And Phosphatase 1	Protein Coding	45	GC08M071210	1.857	https://www.genecards.org/cgi-bin/carddisp.pl?gene=EYA1
OPCML	Opioid Binding Protein/Cell Adhesion Molecule Like	Protein Coding	41	GC11M132405	1.857	https://www.genecards.org/cgi-bin/carddisp.pl?gene=OPCML
MYRIP	Myosin VIIA And Rab Interacting Protein	Protein Coding	38	GC03P039826	1.857	https://www.genecards.org/cgi-bin/carddisp.pl?gene=MYRIP
HMGCR	3-Hydroxy-3-Methylglutaryl-CoA Reductase	Protein Coding	45	GC05P075336	1.85316	https://www.genecards.org/cgi-bin/carddisp.pl?gene=HMGCR
A2M	Alpha-2-Macroglobulin	Protein Coding	44	GC12M009067	1.85122	https://www.genecards.org/cgi-bin/carddisp.pl?gene=A2M
NFE2L2	Nuclear Factor, Erythroid 2 Like 2	Protein Coding	48	GC02M177227	1.84464	https://www.genecards.org/cgi-bin/carddisp.pl?gene=NFE2L2
VEGFC	Vascular Endothelial Growth Factor C	Protein Coding	46	GC04M176683	1.84107	https://www.genecards.org/cgi-bin/carddisp.pl?gene=VEGFC
STAT3	Signal Transducer And Activator Of Transcription 3	Protein Coding	51	GC17M042313	1.8281	https://www.genecards.org/cgi-bin/carddisp.pl?gene=STAT3
NCOA7	Nuclear Receptor Coactivator 7	Protein Coding	37	GC06P125781	1.8281	https://www.genecards.org/cgi-bin/carddisp.pl?gene=NCOA7
XPA	XPA, DNA Damage Recognition And Repair Factor	Protein Coding	45	GC09M097654	1.8274	https://www.genecards.org/cgi-bin/carddisp.pl?gene=XPA
BLK	BLK Proto-Oncogene, Src Family Tyrosine Kinase	Protein Coding	49	GC08P011486	1.82407	https://www.genecards.org/cgi-bin/carddisp.pl?gene=BLK
UBE2B	Ubiquitin Conjugating Enzyme E2 B	Protein Coding	44	GC05P134371	1.81949	https://www.genecards.org/cgi-bin/carddisp.pl?gene=UBE2B
CCDC81	Coiled-Coil Domain Containing 81	Protein Coding	28	GC11P086374	1.81949	https://www.genecards.org/cgi-bin/carddisp.pl?gene=CCDC81
RHO	Rhodopsin	Protein Coding	46	GC03P132084	1.8141	https://www.genecards.org/cgi-bin/carddisp.pl?gene=RHO
PTPRN	Protein Tyrosine Phosphatase Receptor Type N	Protein Coding	44	GC02M219289	1.80771	https://www.genecards.org/cgi-bin/carddisp.pl?gene=PTPRN
PTPRN2	Protein Tyrosine Phosphatase Receptor Type N2	Protein Coding	44	GC07M157539	1.80771	https://www.genecards.org/cgi-bin/carddisp.pl?gene=PTPRN2
IL10	Interleukin 10	Protein Coding	46	GC01M206767	1.8077	https://www.genecards.org/cgi-bin/carddisp.pl?gene=IL10
MEF2C	Myocyte Enhancer Factor 2C	Protein Coding	48	GC05M088718	1.80487	https://www.genecards.org/cgi-bin/carddisp.pl?gene=MEF2C
ADIPOR1	Adiponectin Receptor 1	Protein Coding	44	GC01M202940	1.79547	https://www.genecards.org/cgi-bin/carddisp.pl?gene=ADIPOR1
ADIPOR2	Adiponectin Receptor 2	Protein Coding	42	GC12P001670	1.79547	https://www.genecards.org/cgi-bin/carddisp.pl?gene=ADIPOR2
KCNJ6	Potassium Inwardly Rectifying Channel Subfamily J Member 6	Protein Coding	46	GC21M037607	1.79461	https://www.genecards.org/cgi-bin/carddisp.pl?gene=KCNJ6
HAT1	Histone Acetyltransferase 1	Protein Coding	43	GC02P171922	1.78931	https://www.genecards.org/cgi-bin/carddisp.pl?gene=HAT1
MIR34A	MicroRNA 34a	RNA Gene	22	GC01M009151	1.78761	https://www.genecards.org/cgi-bin/carddisp.pl?gene=MIR34A
FBXL15	F-Box And Leucine Rich Repeat Protein 15	Protein Coding	32	GC10P102419	1.77842	https://www.genecards.org/cgi-bin/carddisp.pl?gene=FBXL15
SERPINA7	Serpin Family A Member 7	Protein Coding	38	GC0XM106032	1.77591	https://www.genecards.org/cgi-bin/carddisp.pl?gene=SERPINA7
RND3	Rho Family GTPase 3	Protein Coding	41	GC02M150468	1.77381	https://www.genecards.org/cgi-bin/carddisp.pl?gene=RND3
P2RX7	Purinergic Receptor P2X 7	Protein Coding	45	GC12P124172	1.77065	https://www.genecards.org/cgi-bin/carddisp.pl?gene=P2RX7
CACUL1	CDK2 Associated Cullin Domain 1	Protein Coding	32	GC10M118674	1.76997	https://www.genecards.org/cgi-bin/carddisp.pl?gene=CACUL1
CD84	CD84 Molecule	Protein Coding	40	GC01M160541	1.76423	https://www.genecards.org/cgi-bin/carddisp.pl?gene=CD84
IL4	Interleukin 4	Protein Coding	44	GC05P132673	1.76412	https://www.genecards.org/cgi-bin/carddisp.pl?gene=IL4
CSF2	Colony Stimulating Factor 2	Protein Coding	42	GC05P132073	1.7591	https://www.genecards.org/cgi-bin/carddisp.pl?gene=CSF2
HSD11B2	Hydroxysteroid 11-Beta Dehydrogenase 2	Protein Coding	45	GC16P067433	1.75903	https://www.genecards.org/cgi-bin/carddisp.pl?gene=HSD11B2
MIR132	MicroRNA 132	RNA Gene	21	GC17M002049	1.75647	https://www.genecards.org/cgi-bin/carddisp.pl?gene=MIR132
GRIA3	Glutamate Ionotropic Receptor AMPA Type Subunit 3	Protein Coding	50	GC0XP123184	1.75585	https://www.genecards.org/cgi-bin/carddisp.pl?gene=GRIA3
OPRL1	Opioid Related Nociceptin Receptor 1	Protein Coding	45	GC20P064080	1.75523	https://www.genecards.org/cgi-bin/carddisp.pl?gene=OPRL1
IGFBP7	Insulin Like Growth Factor Binding Protein 7	Protein Coding	44	GC04M057030	1.75196	https://www.genecards.org/cgi-bin/carddisp.pl?gene=IGFBP7
HSPG2	Heparan Sulfate Proteoglycan 2	Protein Coding	45	GC01M021822	1.74896	https://www.genecards.org/cgi-bin/carddisp.pl?gene=HSPG2
EGFR	Epidermal Growth Factor Receptor	Protein Coding	52	GC07P055019	1.73701	https://www.genecards.org/cgi-bin/carddisp.pl?gene=EGFR
GRM7	Glutamate Metabotropic Receptor 7	Protein Coding	46	GC03P006770	1.73403	https://www.genecards.org/cgi-bin/carddisp.pl?gene=GRM7
GRIK1	Glutamate Ionotropic Receptor Kainate Type Subunit 1	Protein Coding	44	GC21M029536	1.73403	https://www.genecards.org/cgi-bin/carddisp.pl?gene=GRIK1
DLGAP1	DLG Associated Protein 1	Protein Coding	42	GC18M003488	1.73403	https://www.genecards.org/cgi-bin/carddisp.pl?gene=DLGAP1
LEMD3	LEM Domain Containing 3	Protein Coding	40	GC12P065169	1.73352	https://www.genecards.org/cgi-bin/carddisp.pl?gene=LEMD3
SLC7A3	Solute Carrier Family 7 Member 3	Protein Coding	37	GC0XM070926	1.72714	https://www.genecards.org/cgi-bin/carddisp.pl?gene=SLC7A3
SCT	Secretin	Protein Coding	34	GC11M000626	1.72707	https://www.genecards.org/cgi-bin/carddisp.pl?gene=SCT
PPP2CA	Protein Phosphatase 2 Catalytic Subunit Alpha	Protein Coding	48	GC05M134194	1.72565	https://www.genecards.org/cgi-bin/carddisp.pl?gene=PPP2CA
PPP2R5D	Protein Phosphatase 2 Regulatory Subunit B'Delta	Protein Coding	45	GC06P061371	1.72565	https://www.genecards.org/cgi-bin/carddisp.pl?gene=PPP2R5D
PPP2R5E	Protein Phosphatase 2 Regulatory Subunit B'Epsilon	Protein Coding	40	GC14M063371	1.72565	https://www.genecards.org/cgi-bin/carddisp.pl?gene=PPP2R5E
ZPBP2	Zona Pellucida Binding Protein 2	Protein Coding	33	GC17P039871	1.71729	https://www.genecards.org/cgi-bin/carddisp.pl?gene=ZPBP2
FGFR1	Fibroblast Growth Factor Receptor 1	Protein Coding	53	GC08M038400	1.71501	https://www.genecards.org/cgi-bin/carddisp.pl?gene=FGFR1
SHH	Sonic Hedgehog Signaling Molecule	Protein Coding	48	GC07M155799	1.71501	https://www.genecards.org/cgi-bin/carddisp.pl?gene=SHH
GLI2	GLI Family Zinc Finger 2	Protein Coding	47	GC02P120735	1.71501	https://www.genecards.org/cgi-bin/carddisp.pl?gene=GLI2
FGF8	Fibroblast Growth Factor 8	Protein Coding	46	GC10M101770	1.71501	https://www.genecards.org/cgi-bin/carddisp.pl?gene=FGF8
DLL1	Delta Like Canonical Notch Ligand 1	Protein Coding	45	GC06M170282	1.71501	https://www.genecards.org/cgi-bin/carddisp.pl?gene=DLL1
TGIF1	TGFB Induced Factor Homeobox 1	Protein Coding	45	GC18P003411	1.71501	https://www.genecards.org/cgi-bin/carddisp.pl?gene=TGIF1
CDON	Cell Adhesion Associated, Oncogene Regulated	Protein Coding	44	GC11M125955	1.71501	https://www.genecards.org/cgi-bin/carddisp.pl?gene=CDON
STAG2	Stromal Antigen 2	Protein Coding	44	GC0XP123960	1.71501	https://www.genecards.org/cgi-bin/carddisp.pl?gene=STAG2
GAS1	Growth Arrest Specific 1	Protein Coding	42	GC09M086944	1.71501	https://www.genecards.org/cgi-bin/carddisp.pl?gene=GAS1
ZIC2	Zic Family Member 2	Protein Coding	42	GC13P099981	1.71501	https://www.genecards.org/cgi-bin/carddisp.pl?gene=ZIC2
FOXH1	Forkhead Box H1	Protein Coding	41	GC08M144473	1.71501	https://www.genecards.org/cgi-bin/carddisp.pl?gene=FOXH1
TDGF1	Teratocarcinoma-Derived Growth Factor 1	Protein Coding	41	GC03P046595	1.71501	https://www.genecards.org/cgi-bin/carddisp.pl?gene=TDGF1
DISP1	Dispatched RND Transporter Family Member 1	Protein Coding	38	GC01P222814	1.71501	https://www.genecards.org/cgi-bin/carddisp.pl?gene=DISP1
ABCB7	ATP Binding Cassette Subfamily B Member 7	Protein Coding	43	GC0XM075053	1.71378	https://www.genecards.org/cgi-bin/carddisp.pl?gene=ABCB7
CREB3	CAMP Responsive Element Binding Protein 3	Protein Coding	38	GC09P036673	1.71353	https://www.genecards.org/cgi-bin/carddisp.pl?gene=CREB3
KCNMA1	Potassium Calcium-Activated Channel Subfamily M Alpha 1	Protein Coding	49	GC10M076869	1.71267	https://www.genecards.org/cgi-bin/carddisp.pl?gene=KCNMA1
G6PD	Glucose-6-Phosphate Dehydrogenase	Protein Coding	49	GC0XM154531	1.70714	https://www.genecards.org/cgi-bin/carddisp.pl?gene=G6PD
GNAL	G Protein Subunit Alpha L	Protein Coding	45	GC18P011689	1.70591	https://www.genecards.org/cgi-bin/carddisp.pl?gene=GNAL
CSTA	Cystatin A	Protein Coding	42	GC03P122325	1.70548	https://www.genecards.org/cgi-bin/carddisp.pl?gene=CSTA
MIR29B1	MicroRNA 29b-1	RNA Gene	21	GC07M130877	1.70373	https://www.genecards.org/cgi-bin/carddisp.pl?gene=MIR29B1
SOS1	SOS Ras/Rac Guanine Nucleotide Exchange Factor 1	Protein Coding	47	GC02M038981	1.7033	https://www.genecards.org/cgi-bin/carddisp.pl?gene=SOS1
CSNK2B	Casein Kinase 2 Beta	Protein Coding	48	GC06P061173	1.69988	https://www.genecards.org/cgi-bin/carddisp.pl?gene=CSNK2B
COPS2	COP9 Signalosome Subunit 2	Protein Coding	37	GC15M049106	1.69976	https://www.genecards.org/cgi-bin/carddisp.pl?gene=COPS2
DYRK1B	Dual Specificity Tyrosine Phosphorylation Regulated Kinase 1B	Protein Coding	46	GC19M039825	1.69874	https://www.genecards.org/cgi-bin/carddisp.pl?gene=DYRK1B
SIX1	SIX Homeobox 1	Protein Coding	43	GC14M060643	1.69874	https://www.genecards.org/cgi-bin/carddisp.pl?gene=SIX1
SIX2	SIX Homeobox 2	Protein Coding	40	GC02M045005	1.69874	https://www.genecards.org/cgi-bin/carddisp.pl?gene=SIX2
AKT1	AKT Serine/Threonine Kinase 1	Protein Coding	52	GC14M104769	1.69621	https://www.genecards.org/cgi-bin/carddisp.pl?gene=AKT1
PGR	Progesterone Receptor	Protein Coding	49	GC11M101030	1.69582	https://www.genecards.org/cgi-bin/carddisp.pl?gene=PGR
COPA	COPI Coat Complex Subunit Alpha	Protein Coding	41	GC01M160288	1.69021	https://www.genecards.org/cgi-bin/carddisp.pl?gene=COPA
GAL	Galanin And GMAP Prepropeptide	Protein Coding	43	GC11P068684	1.68781	https://www.genecards.org/cgi-bin/carddisp.pl?gene=GAL
GNB4	G Protein Subunit Beta 4	Protein Coding	42	GC03M179397	1.6878	https://www.genecards.org/cgi-bin/carddisp.pl?gene=GNB4
CDKN3	Cyclin Dependent Kinase Inhibitor 3	Protein Coding	41	GC14P054398	1.68332	https://www.genecards.org/cgi-bin/carddisp.pl?gene=CDKN3
OPHN1	Oligophrenin 1	Protein Coding	41	GC0XM067949	1.67726	https://www.genecards.org/cgi-bin/carddisp.pl?gene=OPHN1
CACNA1H	Calcium Voltage-Gated Channel Subunit Alpha1 H	Protein Coding	49	GC16P001153	1.67504	https://www.genecards.org/cgi-bin/carddisp.pl?gene=CACNA1H
CLN5	CLN5 Intracellular Trafficking Protein	Protein Coding	40	GC13P076990	1.67323	https://www.genecards.org/cgi-bin/carddisp.pl?gene=CLN5
SLC25A17	Solute Carrier Family 25 Member 17	Protein Coding	39	GC22M050957	1.67323	https://www.genecards.org/cgi-bin/carddisp.pl?gene=SLC25A17
RHOD	Ras Homolog Family Member D	Protein Coding	38	GC11P067294	1.67323	https://www.genecards.org/cgi-bin/carddisp.pl?gene=RHOD
YIF1A	Yip1 Interacting Factor Homolog A, Membrane Trafficking Protein	Protein Coding	33	GC11M074580	1.67323	https://www.genecards.org/cgi-bin/carddisp.pl?gene=YIF1A
SRC	SRC Proto-Oncogene, Non-Receptor Tyrosine Kinase	Protein Coding	50	GC20P037344	1.66885	https://www.genecards.org/cgi-bin/carddisp.pl?gene=SRC
TYR	Tyrosinase	Protein Coding	46	GC11P089177	1.65859	https://www.genecards.org/cgi-bin/carddisp.pl?gene=TYR
CNR2	Cannabinoid Receptor 2	Protein Coding	45	GC01M023870	1.65859	https://www.genecards.org/cgi-bin/carddisp.pl?gene=CNR2
GJE1	Gap Junction Protein Epsilon 1	Protein Coding	23	GC06P142133	1.65859	https://www.genecards.org/cgi-bin/carddisp.pl?gene=GJE1
VRK2	VRK Serine/Threonine Kinase 2	Protein Coding	41	GC02P057907	1.65673	https://www.genecards.org/cgi-bin/carddisp.pl?gene=VRK2
HTT	Huntingtin	Protein Coding	43	GC04P003041	1.64914	https://www.genecards.org/cgi-bin/carddisp.pl?gene=HTT
SLC18A2	Solute Carrier Family 18 Member A2	Protein Coding	46	GC10P117241	1.64823	https://www.genecards.org/cgi-bin/carddisp.pl?gene=SLC18A2
GUCY2C	Guanylate Cyclase 2C	Protein Coding	44	GC12M014612	1.64686	https://www.genecards.org/cgi-bin/carddisp.pl?gene=GUCY2C
RS1	Retinoschisin 1	Protein Coding	39	GC0XM018639	1.64097	https://www.genecards.org/cgi-bin/carddisp.pl?gene=RS1
RNASEL	Ribonuclease L	Protein Coding	45	GC01M182542	1.63869	https://www.genecards.org/cgi-bin/carddisp.pl?gene=RNASEL
IL2	Interleukin 2	Protein Coding	44	GC04M122451	1.63787	https://www.genecards.org/cgi-bin/carddisp.pl?gene=IL2
TRPV1	Transient Receptor Potential Cation Channel Subfamily V Member 1	Protein Coding	45	GC17M003565	1.6355	https://www.genecards.org/cgi-bin/carddisp.pl?gene=TRPV1
JAK2	Janus Kinase 2	Protein Coding	52	GC09P004985	1.63267	https://www.genecards.org/cgi-bin/carddisp.pl?gene=JAK2
CYP19A1	Cytochrome P450 Family 19 Subfamily A Member 1	Protein Coding	48	GC15M051208	1.62979	https://www.genecards.org/cgi-bin/carddisp.pl?gene=CYP19A1
CRELD1	Cysteine Rich With EGF Like Domains 1	Protein Coding	39	GC03P011238	1.62859	https://www.genecards.org/cgi-bin/carddisp.pl?gene=CRELD1
HNF1A	HNF1 Homeobox A	Protein Coding	45	GC12P120984	1.62537	https://www.genecards.org/cgi-bin/carddisp.pl?gene=HNF1A
UCP2	Uncoupling Protein 2	Protein Coding	45	GC11M073974	1.62537	https://www.genecards.org/cgi-bin/carddisp.pl?gene=UCP2
GFAP	Glial Fibrillary Acidic Protein	Protein Coding	46	GC17M044905	1.61898	https://www.genecards.org/cgi-bin/carddisp.pl?gene=GFAP
HSPA5	Heat Shock Protein Family A (Hsp70) Member 5	Protein Coding	46	GC09M125234	1.61565	https://www.genecards.org/cgi-bin/carddisp.pl?gene=HSPA5
PPAT	Phosphoribosyl Pyrophosphate Amidotransferase	Protein Coding	43	GC04M056393	1.61565	https://www.genecards.org/cgi-bin/carddisp.pl?gene=PPAT
ATF2	Activating Transcription Factor 2	Protein Coding	45	GC02M175072	1.61507	https://www.genecards.org/cgi-bin/carddisp.pl?gene=ATF2
RAB3A	RAB3A, Member RAS Oncogene Family	Protein Coding	42	GC19M018196	1.6135	https://www.genecards.org/cgi-bin/carddisp.pl?gene=RAB3A
TBL1XR1	TBL1X Receptor 1	Protein Coding	44	GC03M177019	1.60704	https://www.genecards.org/cgi-bin/carddisp.pl?gene=TBL1XR1
PEMT	Phosphatidylethanolamine N-Methyltransferase	Protein Coding	40	GC17M017506	1.60605	https://www.genecards.org/cgi-bin/carddisp.pl?gene=PEMT
RBM14	RNA Binding Motif Protein 14	Protein Coding	36	GC11P067244	1.60605	https://www.genecards.org/cgi-bin/carddisp.pl?gene=RBM14
KL	Klotho	Protein Coding	44	GC13P033016	1.60563	https://www.genecards.org/cgi-bin/carddisp.pl?gene=KL
LIMK1	LIM Domain Kinase 1	Protein Coding	49	GC07P074082	1.59376	https://www.genecards.org/cgi-bin/carddisp.pl?gene=LIMK1
SLC12A2	Solute Carrier Family 12 Member 2	Protein Coding	48	GC05P128083	1.59357	https://www.genecards.org/cgi-bin/carddisp.pl?gene=SLC12A2
ATF6	Activating Transcription Factor 6	Protein Coding	46	GC01P161766	1.58794	https://www.genecards.org/cgi-bin/carddisp.pl?gene=ATF6
MPO	Myeloperoxidase	Protein Coding	49	GC17M058269	1.57875	https://www.genecards.org/cgi-bin/carddisp.pl?gene=MPO
TNFRSF11A	TNF Receptor Superfamily Member 11a	Protein Coding	44	GC18P062325	1.57771	https://www.genecards.org/cgi-bin/carddisp.pl?gene=TNFRSF11A
ACP3	Acid Phosphatase 3	Protein Coding	34	GC03P132322	1.57705	https://www.genecards.org/cgi-bin/carddisp.pl?gene=ACP3
LCN2	Lipocalin 2	Protein Coding	42	GC09P128149	1.57293	https://www.genecards.org/cgi-bin/carddisp.pl?gene=LCN2
CIDEC	Cell Death Inducing DFFA Like Effector C	Protein Coding	40	GC03M009866	1.57147	https://www.genecards.org/cgi-bin/carddisp.pl?gene=CIDEC
SIK3	SIK Family Kinase 3	Protein Coding	41	GC11M116843	1.57095	https://www.genecards.org/cgi-bin/carddisp.pl?gene=SIK3
CBWD2	COBW Domain Containing 2	Protein Coding	28	GC02P118069	1.57095	https://www.genecards.org/cgi-bin/carddisp.pl?gene=CBWD2
LINC-ROR	Long Intergenic Non-Protein Coding RNA, Regulator Of Reprogramming	RNA Gene	17	GC18M057054	1.57095	https://www.genecards.org/cgi-bin/carddisp.pl?gene=LINC-ROR
CYP2A6	Cytochrome P450 Family 2 Subfamily A Member 6	Protein Coding	48	GC19M040843	1.5704	https://www.genecards.org/cgi-bin/carddisp.pl?gene=CYP2A6
CHRM1	Cholinergic Receptor Muscarinic 1	Protein Coding	45	GC11M074365	1.56526	https://www.genecards.org/cgi-bin/carddisp.pl?gene=CHRM1
PCNA	Proliferating Cell Nuclear Antigen	Protein Coding	50	GC20M005114	1.56082	https://www.genecards.org/cgi-bin/carddisp.pl?gene=PCNA
CTSB	Cathepsin B	Protein Coding	50	GC08M011842	1.56005	https://www.genecards.org/cgi-bin/carddisp.pl?gene=CTSB
CYP3A5	Cytochrome P450 Family 3 Subfamily A Member 5	Protein Coding	47	GC07M099648	1.55997	https://www.genecards.org/cgi-bin/carddisp.pl?gene=CYP3A5
ABHD5	Abhydrolase Domain Containing 5, Lysophosphatidic Acid Acyltransferase	Protein Coding	44	GC03P043707	1.55423	https://www.genecards.org/cgi-bin/carddisp.pl?gene=ABHD5
ZACN	Zinc Activated Ion Channel	Protein Coding	33	GC17P076071	1.55423	https://www.genecards.org/cgi-bin/carddisp.pl?gene=ZACN
PEX14	Peroxisomal Biogenesis Factor 14	Protein Coding	43	GC01P010472	1.55246	https://www.genecards.org/cgi-bin/carddisp.pl?gene=PEX14
PSME2	Proteasome Activator Subunit 2	Protein Coding	41	GC14M024143	1.54538	https://www.genecards.org/cgi-bin/carddisp.pl?gene=PSME2
GPR50	G Protein-Coupled Receptor 50	Protein Coding	42	GC0XP151176	1.54308	https://www.genecards.org/cgi-bin/carddisp.pl?gene=GPR50
TET2	Tet Methylcytosine Dioxygenase 2	Protein Coding	44	GC04P105145	1.54081	https://www.genecards.org/cgi-bin/carddisp.pl?gene=TET2
NCOA1	Nuclear Receptor Coactivator 1	Protein Coding	44	GC02P024492	1.53478	https://www.genecards.org/cgi-bin/carddisp.pl?gene=NCOA1
MED1	Mediator Complex Subunit 1	Protein Coding	41	GC17M039404	1.53478	https://www.genecards.org/cgi-bin/carddisp.pl?gene=MED1
RPS6KA5	Ribosomal Protein S6 Kinase A5	Protein Coding	45	GC14M090847	1.53369	https://www.genecards.org/cgi-bin/carddisp.pl?gene=RPS6KA5
YWHAE	Tyrosine 3-Monooxygenase/Tryptophan 5-Monooxygenase Activation Protein Epsilon	Protein Coding	48	GC17M001346	1.53354	https://www.genecards.org/cgi-bin/carddisp.pl?gene=YWHAE
CHRM2	Cholinergic Receptor Muscarinic 2	Protein Coding	48	GC07P136868	1.53209	https://www.genecards.org/cgi-bin/carddisp.pl?gene=CHRM2
GLUD1	Glutamate Dehydrogenase 1	Protein Coding	49	GC10M087050	1.52879	https://www.genecards.org/cgi-bin/carddisp.pl?gene=GLUD1
IL2RA	Interleukin 2 Receptor Subunit Alpha	Protein Coding	49	GC10M006010	1.52684	https://www.genecards.org/cgi-bin/carddisp.pl?gene=IL2RA
CYP11B1	Cytochrome P450 Family 11 Subfamily B Member 1	Protein Coding	48	GC08M142872	1.52649	https://www.genecards.org/cgi-bin/carddisp.pl?gene=CYP11B1
ARHGEF5	Rho Guanine Nucleotide Exchange Factor 5	Protein Coding	38	GC07P144355	1.52642	https://www.genecards.org/cgi-bin/carddisp.pl?gene=ARHGEF5
MAT1A	Methionine Adenosyltransferase 1A	Protein Coding	46	GC10M080271	1.52628	https://www.genecards.org/cgi-bin/carddisp.pl?gene=MAT1A
UCP3	Uncoupling Protein 3	Protein Coding	42	GC11M074000	1.52527	https://www.genecards.org/cgi-bin/carddisp.pl?gene=UCP3
SLC17A8	Solute Carrier Family 17 Member 8	Protein Coding	41	GC12P100357	1.524	https://www.genecards.org/cgi-bin/carddisp.pl?gene=SLC17A8
MSRA	Methionine Sulfoxide Reductase A	Protein Coding	42	GC08P010054	1.51906	https://www.genecards.org/cgi-bin/carddisp.pl?gene=MSRA
SCYL1	SCY1 Like Pseudokinase 1	Protein Coding	42	GC11P065525	1.51906	https://www.genecards.org/cgi-bin/carddisp.pl?gene=SCYL1
RPL3	Ribosomal Protein L3	Protein Coding	41	GC22M050950	1.51906	https://www.genecards.org/cgi-bin/carddisp.pl?gene=RPL3
PSME4	Proteasome Activator Subunit 4	Protein Coding	39	GC02M053864	1.51906	https://www.genecards.org/cgi-bin/carddisp.pl?gene=PSME4
TOX3	TOX High Mobility Group Box Family Member 3	Protein Coding	37	GC16M052442	1.51906	https://www.genecards.org/cgi-bin/carddisp.pl?gene=TOX3
RPRD2	Regulation Of Nuclear Pre-MRNA Domain Containing 2	Protein Coding	36	GC01P150363	1.51906	https://www.genecards.org/cgi-bin/carddisp.pl?gene=RPRD2
FAM83B	Family With Sequence Similarity 83 Member B	Protein Coding	33	GC06P054846	1.51906	https://www.genecards.org/cgi-bin/carddisp.pl?gene=FAM83B
CASC16	Cancer Susceptibility 16	RNA Gene	14	GC16M052587	1.51906	https://www.genecards.org/cgi-bin/carddisp.pl?gene=CASC16
CSE1L	Chromosome Segregation 1 Like	Protein Coding	40	GC20P049046	1.51882	https://www.genecards.org/cgi-bin/carddisp.pl?gene=CSE1L
CACNA1G	Calcium Voltage-Gated Channel Subunit Alpha1 G	Protein Coding	48	GC17P050563	1.51768	https://www.genecards.org/cgi-bin/carddisp.pl?gene=CACNA1G
LPL	Lipoprotein Lipase	Protein Coding	48	GC08P019901	1.51758	https://www.genecards.org/cgi-bin/carddisp.pl?gene=LPL
LINC00689	Long Intergenic Non-Protein Coding RNA 689	RNA Gene	15	GC07P159006	1.51479	https://www.genecards.org/cgi-bin/carddisp.pl?gene=LINC00689
FBP1	Fructose-Bisphosphatase 1	Protein Coding	48	GC09M094603	1.51198	https://www.genecards.org/cgi-bin/carddisp.pl?gene=FBP1
IDS	Iduronate 2-Sulfatase	Protein Coding	47	GC0XM149476	1.51198	https://www.genecards.org/cgi-bin/carddisp.pl?gene=IDS
SFTPB	Surfactant Protein B	Protein Coding	43	GC02M085657	1.51198	https://www.genecards.org/cgi-bin/carddisp.pl?gene=SFTPB
BAX	BCL2 Associated X, Apoptosis Regulator	Protein Coding	48	GC19P048954	1.50788	https://www.genecards.org/cgi-bin/carddisp.pl?gene=BAX
MBD5	Methyl-CpG Binding Domain Protein 5	Protein Coding	36	GC02P148021	1.50724	https://www.genecards.org/cgi-bin/carddisp.pl?gene=MBD5
PEPC	Peptidase C	Protein Coding	5	GC01U990121	1.50629	https://www.genecards.org/cgi-bin/carddisp.pl?gene=PEPC
PDC	Phosducin	Protein Coding	38	GC01M186412	1.50262	https://www.genecards.org/cgi-bin/carddisp.pl?gene=PDC
MLN	Motilin	Protein Coding	34	GC06M033794	1.49958	https://www.genecards.org/cgi-bin/carddisp.pl?gene=MLN
KPNB1	Karyopherin Subunit Beta 1	Protein Coding	42	GC17P047649	1.49742	https://www.genecards.org/cgi-bin/carddisp.pl?gene=KPNB1
NECTIN1	Nectin Cell Adhesion Molecule 1	Protein Coding	37	GC11M119624	1.49224	https://www.genecards.org/cgi-bin/carddisp.pl?gene=NECTIN1
COX7B	Cytochrome C Oxidase Subunit 7B	Protein Coding	40	GC0XP077899	1.48872	https://www.genecards.org/cgi-bin/carddisp.pl?gene=COX7B
SLC2A2	Solute Carrier Family 2 Member 2	Protein Coding	48	GC03M171014	1.48468	https://www.genecards.org/cgi-bin/carddisp.pl?gene=SLC2A2
DNAH8	Dynein Axonemal Heavy Chain 8	Protein Coding	37	GC06P061334	1.48399	https://www.genecards.org/cgi-bin/carddisp.pl?gene=DNAH8
AQP3	Aquaporin 3 (Gill Blood Group)	Protein Coding	46	GC09M033431	1.4805	https://www.genecards.org/cgi-bin/carddisp.pl?gene=AQP3
CDK5R1	Cyclin Dependent Kinase 5 Regulatory Subunit 1	Protein Coding	45	GC17P032497	1.47915	https://www.genecards.org/cgi-bin/carddisp.pl?gene=CDK5R1
GNG11	G Protein Subunit Gamma 11	Protein Coding	37	GC07P093921	1.4778	https://www.genecards.org/cgi-bin/carddisp.pl?gene=GNG11
GGT1	Gamma-Glutamyltransferase 1	Protein Coding	47	GC22P024583	1.47452	https://www.genecards.org/cgi-bin/carddisp.pl?gene=GGT1
SNAI1	Snail Family Transcriptional Repressor 1	Protein Coding	43	GC20P049982	1.47386	https://www.genecards.org/cgi-bin/carddisp.pl?gene=SNAI1
ADRA1B	Adrenoceptor Alpha 1B	Protein Coding	46	GC05P159867	1.47138	https://www.genecards.org/cgi-bin/carddisp.pl?gene=ADRA1B
CD63	CD63 Molecule	Protein Coding	41	GC12M055725	1.4697	https://www.genecards.org/cgi-bin/carddisp.pl?gene=CD63
HSD11B1	Hydroxysteroid 11-Beta Dehydrogenase 1	Protein Coding	49	GC01P209686	1.46848	https://www.genecards.org/cgi-bin/carddisp.pl?gene=HSD11B1
HRH3	Histamine Receptor H3	Protein Coding	42	GC20M062214	1.46581	https://www.genecards.org/cgi-bin/carddisp.pl?gene=HRH3
SYNCRIP	Synaptotagmin Binding Cytoplasmic RNA Interacting Protein	Protein Coding	38	GC06M085607	1.45911	https://www.genecards.org/cgi-bin/carddisp.pl?gene=SYNCRIP
HSPE1	Heat Shock Protein Family E (Hsp10) Member 1	Protein Coding	40	GC02P197501	1.45761	https://www.genecards.org/cgi-bin/carddisp.pl?gene=HSPE1
GNB2	G Protein Subunit Beta 2	Protein Coding	42	GC07P100673	1.45236	https://www.genecards.org/cgi-bin/carddisp.pl?gene=GNB2
UBA52	Ubiquitin A-52 Residue Ribosomal Protein Fusion Product 1	Protein Coding	40	GC19P018563	1.45196	https://www.genecards.org/cgi-bin/carddisp.pl?gene=UBA52
ERN1	Endoplasmic Reticulum To Nucleus Signaling 1	Protein Coding	45	GC17M064039	1.44952	https://www.genecards.org/cgi-bin/carddisp.pl?gene=ERN1
KCNQ2	Potassium Voltage-Gated Channel Subfamily Q Member 2	Protein Coding	48	GC20M063400	1.44085	https://www.genecards.org/cgi-bin/carddisp.pl?gene=KCNQ2
KCNQ3	Potassium Voltage-Gated Channel Subfamily Q Member 3	Protein Coding	45	GC08M132120	1.44085	https://www.genecards.org/cgi-bin/carddisp.pl?gene=KCNQ3
HBB	Hemoglobin Subunit Beta	Protein Coding	45	GC11M005809	1.43747	https://www.genecards.org/cgi-bin/carddisp.pl?gene=HBB
TSC2	TSC Complex Subunit 2	Protein Coding	49	GC16P006812	1.43585	https://www.genecards.org/cgi-bin/carddisp.pl?gene=TSC2
HLA-DRB1	Major Histocompatibility Complex, Class II, DR Beta 1	Protein Coding	46	GC06M032578	1.43585	https://www.genecards.org/cgi-bin/carddisp.pl?gene=HLA-DRB1
GTF2IRD1	GTF2I Repeat Domain Containing 1	Protein Coding	42	GC07P074468	1.43585	https://www.genecards.org/cgi-bin/carddisp.pl?gene=GTF2IRD1
RPS6	Ribosomal Protein S6	Protein Coding	43	GC09M019375	1.4353	https://www.genecards.org/cgi-bin/carddisp.pl?gene=RPS6
TWIST1	Twist Family BHLH Transcription Factor 1	Protein Coding	45	GC07M019020	1.43294	https://www.genecards.org/cgi-bin/carddisp.pl?gene=TWIST1
OPN1LW	Opsin 1, Long Wave Sensitive	Protein Coding	34	GC0XP154144	1.42904	https://www.genecards.org/cgi-bin/carddisp.pl?gene=OPN1LW
RPS3	Ribosomal Protein S3	Protein Coding	43	GC11P076606	1.42542	https://www.genecards.org/cgi-bin/carddisp.pl?gene=RPS3
MATR3	Matrin 3	Protein Coding	42	GC05P139274	1.42542	https://www.genecards.org/cgi-bin/carddisp.pl?gene=MATR3
TRIM28	Tripartite Motif Containing 28	Protein Coding	42	GC19P058544	1.42234	https://www.genecards.org/cgi-bin/carddisp.pl?gene=TRIM28
FST	Follistatin	Protein Coding	45	GC05P053480	1.42088	https://www.genecards.org/cgi-bin/carddisp.pl?gene=FST
LIN28A	Lin-28 Homolog A	Protein Coding	39	GC01P026410	1.4194	https://www.genecards.org/cgi-bin/carddisp.pl?gene=LIN28A
TRRAP	Transformation/Transcription Domain Associated Protein	Protein Coding	45	GC07P098877	1.41731	https://www.genecards.org/cgi-bin/carddisp.pl?gene=TRRAP
MT3	Metallothionein 3	Protein Coding	38	GC16P056589	1.41731	https://www.genecards.org/cgi-bin/carddisp.pl?gene=MT3
ADM	Adrenomedullin	Protein Coding	44	GC11P010304	1.41559	https://www.genecards.org/cgi-bin/carddisp.pl?gene=ADM
APOA4	Apolipoprotein A4	Protein Coding	41	GC11M116820	1.41559	https://www.genecards.org/cgi-bin/carddisp.pl?gene=APOA4
MEIS1	Meis Homeobox 1	Protein Coding	42	GC02P066433	1.41403	https://www.genecards.org/cgi-bin/carddisp.pl?gene=MEIS1
FAT1	FAT Atypical Cadherin 1	Protein Coding	39	GC04M186587	1.41403	https://www.genecards.org/cgi-bin/carddisp.pl?gene=FAT1
LRRK2	Leucine Rich Repeat Kinase 2	Protein Coding	49	GC12P040196	1.40879	https://www.genecards.org/cgi-bin/carddisp.pl?gene=LRRK2
GHRHR	Growth Hormone Releasing Hormone Receptor	Protein Coding	43	GC07P030938	1.40804	https://www.genecards.org/cgi-bin/carddisp.pl?gene=GHRHR
PKM	Pyruvate Kinase M1/2	Protein Coding	44	GC15M072199	1.40608	https://www.genecards.org/cgi-bin/carddisp.pl?gene=PKM
MYOD1	Myogenic Differentiation 1	Protein Coding	46	GC11P017741	1.40408	https://www.genecards.org/cgi-bin/carddisp.pl?gene=MYOD1
NRAS	NRAS Proto-Oncogene, GTPase	Protein Coding	48	GC01M114704	1.39923	https://www.genecards.org/cgi-bin/carddisp.pl?gene=NRAS
FGF2	Fibroblast Growth Factor 2	Protein Coding	46	GC04P122826	1.39595	https://www.genecards.org/cgi-bin/carddisp.pl?gene=FGF2
CA6	Carbonic Anhydrase 6	Protein Coding	42	GC01P008945	1.39454	https://www.genecards.org/cgi-bin/carddisp.pl?gene=CA6
GSTM3	Glutathione S-Transferase Mu 3	Protein Coding	45	GC01M109733	1.3932	https://www.genecards.org/cgi-bin/carddisp.pl?gene=GSTM3
RYR3	Ryanodine Receptor 3	Protein Coding	41	GC15P033310	1.3932	https://www.genecards.org/cgi-bin/carddisp.pl?gene=RYR3
PRNP	Prion Protein	Protein Coding	45	GC20P004686	1.39274	https://www.genecards.org/cgi-bin/carddisp.pl?gene=PRNP
ADCY5	Adenylate Cyclase 5	Protein Coding	48	GC03M123282	1.3908	https://www.genecards.org/cgi-bin/carddisp.pl?gene=ADCY5
GRM5	Glutamate Metabotropic Receptor 5	Protein Coding	47	GC11M088504	1.38891	https://www.genecards.org/cgi-bin/carddisp.pl?gene=GRM5
SPSB1	SplA/Ryanodine Receptor Domain And SOCS Box Containing 1	Protein Coding	37	GC01P009292	1.38735	https://www.genecards.org/cgi-bin/carddisp.pl?gene=SPSB1
AKAP8	A-Kinase Anchoring Protein 8	Protein Coding	41	GC19M015354	1.38499	https://www.genecards.org/cgi-bin/carddisp.pl?gene=AKAP8
GRIN2A	Glutamate Ionotropic Receptor NMDA Type Subunit 2A	Protein Coding	51	GC16M009753	1.38499	https://www.genecards.org/cgi-bin/carddisp.pl?gene=GRIN2A
NEDD4L	NEDD4 Like E3 Ubiquitin Protein Ligase	Protein Coding	46	GC18P058044	1.3754	https://www.genecards.org/cgi-bin/carddisp.pl?gene=NEDD4L
RARA	Retinoic Acid Receptor Alpha	Protein Coding	49	GC17P040309	1.37282	https://www.genecards.org/cgi-bin/carddisp.pl?gene=RARA
FLNA	Filamin A	Protein Coding	48	GC0XM154348	1.37255	https://www.genecards.org/cgi-bin/carddisp.pl?gene=FLNA
GNAI3	G Protein Subunit Alpha I3	Protein Coding	46	GC01P109548	1.37233	https://www.genecards.org/cgi-bin/carddisp.pl?gene=GNAI3
ABAT	4-Aminobutyrate Aminotransferase	Protein Coding	45	GC16P008674	1.37126	https://www.genecards.org/cgi-bin/carddisp.pl?gene=ABAT
HSPD1P15	Heat Shock Protein Family D (Hsp60) Member 1 Pseudogene 15	Pseudogene	6	GC05P019233	1.37126	https://www.genecards.org/cgi-bin/carddisp.pl?gene=HSPD1P15
FGF19	Fibroblast Growth Factor 19	Protein Coding	42	GC11M074766	1.36758	https://www.genecards.org/cgi-bin/carddisp.pl?gene=FGF19
PPARD	Peroxisome Proliferator Activated Receptor Delta	Protein Coding	46	GC06P061290	1.36394	https://www.genecards.org/cgi-bin/carddisp.pl?gene=PPARD
SLC5A1	Solute Carrier Family 5 Member 1	Protein Coding	49	GC22P032043	1.36257	https://www.genecards.org/cgi-bin/carddisp.pl?gene=SLC5A1
CAMK2D	Calcium/Calmodulin Dependent Protein Kinase II Delta	Protein Coding	48	GC04M113418	1.35618	https://www.genecards.org/cgi-bin/carddisp.pl?gene=CAMK2D
HNRNPA1	Heterogeneous Nuclear Ribonucleoprotein A1	Protein Coding	45	GC12P054280	1.35415	https://www.genecards.org/cgi-bin/carddisp.pl?gene=HNRNPA1
VTRNA3-1P	Vault RNA 3-1, Pseudogene	Pseudogene	5	GC0XP053696	1.35408	https://www.genecards.org/cgi-bin/carddisp.pl?gene=VTRNA3-1P
ARID1A	AT-Rich Interaction Domain 1A	Protein Coding	44	GC01P026693	1.35016	https://www.genecards.org/cgi-bin/carddisp.pl?gene=ARID1A
IL13	Interleukin 13	Protein Coding	43	GC05P132656	1.34811	https://www.genecards.org/cgi-bin/carddisp.pl?gene=IL13
MAOB	Monoamine Oxidase B	Protein Coding	42	GC0XM043766	1.34768	https://www.genecards.org/cgi-bin/carddisp.pl?gene=MAOB
PLAU	Plasminogen Activator, Urokinase	Protein Coding	50	GC10P073909	1.3465	https://www.genecards.org/cgi-bin/carddisp.pl?gene=PLAU
WNT10A	Wnt Family Member 10A	Protein Coding	45	GC02P218880	1.34648	https://www.genecards.org/cgi-bin/carddisp.pl?gene=WNT10A
ST8SIA2	ST8 Alpha-N-Acetyl-Neuraminide Alpha-2,8-Sialyltransferase 2	Protein Coding	41	GC15P092393	1.34648	https://www.genecards.org/cgi-bin/carddisp.pl?gene=ST8SIA2
VRK3	VRK Serine/Threonine Kinase 3	Protein Coding	39	GC19M049976	1.34648	https://www.genecards.org/cgi-bin/carddisp.pl?gene=VRK3
CYP8B1	Cytochrome P450 Family 8 Subfamily B Member 1	Protein Coding	40	GC03M042856	1.34405	https://www.genecards.org/cgi-bin/carddisp.pl?gene=CYP8B1
H3-3B	H3.3 Histone B	Protein Coding	33	GC17M075794	1.34405	https://www.genecards.org/cgi-bin/carddisp.pl?gene=H3-3B
SERPINA1	Serpin Family A Member 1	Protein Coding	48	GC14M094376	1.34401	https://www.genecards.org/cgi-bin/carddisp.pl?gene=SERPINA1
S100B	S100 Calcium Binding Protein B	Protein Coding	44	GC21M048936	1.34144	https://www.genecards.org/cgi-bin/carddisp.pl?gene=S100B
PTGDR	Prostaglandin D2 Receptor	Protein Coding	46	GC14P052267	1.33788	https://www.genecards.org/cgi-bin/carddisp.pl?gene=PTGDR
SIRT6	Sirtuin 6	Protein Coding	45	GC19M004174	1.33737	https://www.genecards.org/cgi-bin/carddisp.pl?gene=SIRT6
GRK1	G Protein-Coupled Receptor Kinase 1	Protein Coding	42	GC13P113645	1.33737	https://www.genecards.org/cgi-bin/carddisp.pl?gene=GRK1
ICAM1	Intercellular Adhesion Molecule 1	Protein Coding	49	GC19P010270	1.33628	https://www.genecards.org/cgi-bin/carddisp.pl?gene=ICAM1
FBXO5	F-Box Protein 5	Protein Coding	37	GC06M152970	1.33445	https://www.genecards.org/cgi-bin/carddisp.pl?gene=FBXO5
TXNIP	Thioredoxin Interacting Protein	Protein Coding	37	GC01M145992	1.33445	https://www.genecards.org/cgi-bin/carddisp.pl?gene=TXNIP
NOTCH1	Notch Receptor 1	Protein Coding	50	GC09M136892	1.33431	https://www.genecards.org/cgi-bin/carddisp.pl?gene=NOTCH1
HTR3A	5-Hydroxytryptamine Receptor 3A	Protein Coding	45	GC11P113974	1.32665	https://www.genecards.org/cgi-bin/carddisp.pl?gene=HTR3A
TRAT1	T Cell Receptor Associated Transmembrane Adaptor 1	Protein Coding	36	GC03P108823	1.31771	https://www.genecards.org/cgi-bin/carddisp.pl?gene=TRAT1
NR6A1	Nuclear Receptor Subfamily 6 Group A Member 1	Protein Coding	40	GC09M124517	1.31677	https://www.genecards.org/cgi-bin/carddisp.pl?gene=NR6A1
IGF1R	Insulin Like Growth Factor 1 Receptor	Protein Coding	53	GC15P098648	1.3131	https://www.genecards.org/cgi-bin/carddisp.pl?gene=IGF1R
FANCL	FA Complementation Group L	Protein Coding	45	GC02M058127	1.3131	https://www.genecards.org/cgi-bin/carddisp.pl?gene=FANCL
EPB41	Erythrocyte Membrane Protein Band 4.1	Protein Coding	45	GC01P028887	1.3131	https://www.genecards.org/cgi-bin/carddisp.pl?gene=EPB41
TRPA1	Transient Receptor Potential Cation Channel Subfamily A Member 1	Protein Coding	45	GC08M072019	1.3131	https://www.genecards.org/cgi-bin/carddisp.pl?gene=TRPA1
CBLB	Cbl Proto-Oncogene B	Protein Coding	44	GC03M105655	1.3131	https://www.genecards.org/cgi-bin/carddisp.pl?gene=CBLB
HABP2	Hyaluronan Binding Protein 2	Protein Coding	44	GC10P113550	1.3131	https://www.genecards.org/cgi-bin/carddisp.pl?gene=HABP2
COL9A1	Collagen Type IX Alpha 1 Chain	Protein Coding	42	GC06M070215	1.3131	https://www.genecards.org/cgi-bin/carddisp.pl?gene=COL9A1
RBCK1	RANBP2-Type And C3HC4-Type Zinc Finger Containing 1	Protein Coding	42	GC20P000407	1.3131	https://www.genecards.org/cgi-bin/carddisp.pl?gene=RBCK1
SLC10A2	Solute Carrier Family 10 Member 2	Protein Coding	42	GC13M103043	1.3131	https://www.genecards.org/cgi-bin/carddisp.pl?gene=SLC10A2
ST3GAL1	ST3 Beta-Galactoside Alpha-2,3-Sialyltransferase 1	Protein Coding	42	GC08M133454	1.3131	https://www.genecards.org/cgi-bin/carddisp.pl?gene=ST3GAL1
PTPRT	Protein Tyrosine Phosphatase Receptor Type T	Protein Coding	42	GC20M042072	1.3131	https://www.genecards.org/cgi-bin/carddisp.pl?gene=PTPRT
DSCAM	DS Cell Adhesion Molecule	Protein Coding	41	GC21M040010	1.3131	https://www.genecards.org/cgi-bin/carddisp.pl?gene=DSCAM
AFF2	AF4/FMR2 Family Member 2	Protein Coding	41	GC0XP148500	1.3131	https://www.genecards.org/cgi-bin/carddisp.pl?gene=AFF2
ATRIP	ATR Interacting Protein	Protein Coding	41	GC03P048449	1.3131	https://www.genecards.org/cgi-bin/carddisp.pl?gene=ATRIP
MMADHC	Metabolism Of Cobalamin Associated D	Protein Coding	41	GC02M149569	1.3131	https://www.genecards.org/cgi-bin/carddisp.pl?gene=MMADHC
RGS6	Regulator Of G Protein Signaling 6	Protein Coding	41	GC14P071867	1.3131	https://www.genecards.org/cgi-bin/carddisp.pl?gene=RGS6
ANKS1B	Ankyrin Repeat And Sterile Alpha Motif Domain Containing 1B	Protein Coding	40	GC12M098726	1.3131	https://www.genecards.org/cgi-bin/carddisp.pl?gene=ANKS1B
ITPK1	Inositol-Tetrakisphosphate 1-Kinase	Protein Coding	40	GC14M092936	1.3131	https://www.genecards.org/cgi-bin/carddisp.pl?gene=ITPK1
NTM	Neurotrimin	Protein Coding	40	GC11P131370	1.3131	https://www.genecards.org/cgi-bin/carddisp.pl?gene=NTM
TNIP1	TNFAIP3 Interacting Protein 1	Protein Coding	40	GC05M151029	1.3131	https://www.genecards.org/cgi-bin/carddisp.pl?gene=TNIP1
DOCK4	Dedicator Of Cytokinesis 4	Protein Coding	39	GC07M111726	1.3131	https://www.genecards.org/cgi-bin/carddisp.pl?gene=DOCK4
ING3	Inhibitor Of Growth Family Member 3	Protein Coding	39	GC07P120950	1.3131	https://www.genecards.org/cgi-bin/carddisp.pl?gene=ING3
LRRC4C	Leucine Rich Repeat Containing 4C	Protein Coding	39	GC11M040114	1.3131	https://www.genecards.org/cgi-bin/carddisp.pl?gene=LRRC4C
SEC23IP	SEC23 Interacting Protein	Protein Coding	39	GC10P119892	1.3131	https://www.genecards.org/cgi-bin/carddisp.pl?gene=SEC23IP
RNF19A	Ring Finger Protein 19A, RBR E3 Ubiquitin Protein Ligase	Protein Coding	39	GC08M100257	1.3131	https://www.genecards.org/cgi-bin/carddisp.pl?gene=RNF19A
CD180	CD180 Molecule	Protein Coding	38	GC05M067181	1.3131	https://www.genecards.org/cgi-bin/carddisp.pl?gene=CD180
IRX1	Iroquois Homeobox 1	Protein Coding	38	GC05P003596	1.3131	https://www.genecards.org/cgi-bin/carddisp.pl?gene=IRX1
FOXN3	Forkhead Box N3	Protein Coding	38	GC14M097073	1.3131	https://www.genecards.org/cgi-bin/carddisp.pl?gene=FOXN3
SORCS1	Sortilin Related VPS10 Domain Containing Receptor 1	Protein Coding	38	GC10M106573	1.3131	https://www.genecards.org/cgi-bin/carddisp.pl?gene=SORCS1
ARL4A	ADP Ribosylation Factor Like GTPase 4A	Protein Coding	37	GC07P012712	1.3131	https://www.genecards.org/cgi-bin/carddisp.pl?gene=ARL4A
ATP10B	ATPase Phospholipid Transporting 10B (Putative)	Protein Coding	36	GC05M160499	1.3131	https://www.genecards.org/cgi-bin/carddisp.pl?gene=ATP10B
NXPH1	Neurexophilin 1	Protein Coding	36	GC07P008440	1.3131	https://www.genecards.org/cgi-bin/carddisp.pl?gene=NXPH1
NAALADL2	N-Acetylated Alpha-Linked Acidic Dipeptidase Like 2	Protein Coding	36	GC03P174438	1.3131	https://www.genecards.org/cgi-bin/carddisp.pl?gene=NAALADL2
RASSF8	Ras Association Domain Family Member 8	Protein Coding	36	GC12P025959	1.3131	https://www.genecards.org/cgi-bin/carddisp.pl?gene=RASSF8
SPCS3	Signal Peptidase Complex Subunit 3	Protein Coding	36	GC04P176319	1.3131	https://www.genecards.org/cgi-bin/carddisp.pl?gene=SPCS3
VTA1	Vesicle Trafficking 1	Protein Coding	36	GC06P142147	1.3131	https://www.genecards.org/cgi-bin/carddisp.pl?gene=VTA1
POF1B	POF1B Actin Binding Protein	Protein Coding	35	GC0XM085277	1.3131	https://www.genecards.org/cgi-bin/carddisp.pl?gene=POF1B
MAGEC2	MAGE Family Member C2	Protein Coding	35	GC0XM142202	1.3131	https://www.genecards.org/cgi-bin/carddisp.pl?gene=MAGEC2
BRMS1L	BRMS1 Like Transcriptional Repressor	Protein Coding	34	GC14P035844	1.3131	https://www.genecards.org/cgi-bin/carddisp.pl?gene=BRMS1L
LCORL	Ligand Dependent Nuclear Receptor Corepressor Like	Protein Coding	34	GC04M017844	1.3131	https://www.genecards.org/cgi-bin/carddisp.pl?gene=LCORL
TANC2	Tetratricopeptide Repeat, Ankyrin Repeat And Coiled-Coil Containing 2	Protein Coding	34	GC17P062967	1.3131	https://www.genecards.org/cgi-bin/carddisp.pl?gene=TANC2
TXNDC2	Thioredoxin Domain Containing 2	Protein Coding	34	GC18P009885	1.3131	https://www.genecards.org/cgi-bin/carddisp.pl?gene=TXNDC2
RHBDD1	Rhomboid Domain Containing 1	Protein Coding	34	GC02P226805	1.3131	https://www.genecards.org/cgi-bin/carddisp.pl?gene=RHBDD1
KCTD8	Potassium Channel Tetramerization Domain Containing 8	Protein Coding	33	GC04M044173	1.3131	https://www.genecards.org/cgi-bin/carddisp.pl?gene=KCTD8
PELI2	Pellino E3 Ubiquitin Protein Ligase Family Member 2	Protein Coding	33	GC14P056117	1.3131	https://www.genecards.org/cgi-bin/carddisp.pl?gene=PELI2
ZNF662	Zinc Finger Protein 662	Protein Coding	33	GC03P043062	1.3131	https://www.genecards.org/cgi-bin/carddisp.pl?gene=ZNF662
FERD3L	Fer3 Like BHLH Transcription Factor	Protein Coding	32	GC07M019144	1.3131	https://www.genecards.org/cgi-bin/carddisp.pl?gene=FERD3L
MAP9	Microtubule Associated Protein 9	Protein Coding	32	GC04M155342	1.3131	https://www.genecards.org/cgi-bin/carddisp.pl?gene=MAP9
HDX	Highly Divergent Homeobox	Protein Coding	30	GC0XM084317	1.3131	https://www.genecards.org/cgi-bin/carddisp.pl?gene=HDX
OR10R2	Olfactory Receptor Family 10 Subfamily R Member 2	Protein Coding	30	GC01P158472	1.3131	https://www.genecards.org/cgi-bin/carddisp.pl?gene=OR10R2
CTXN3	Cortexin 3	Protein Coding	28	GC05P127649	1.3131	https://www.genecards.org/cgi-bin/carddisp.pl?gene=CTXN3
CDC14C	Cell Division Cycle 14C	Protein Coding	22	GC07P048919	1.3131	https://www.genecards.org/cgi-bin/carddisp.pl?gene=CDC14C
RPL21P28	Ribosomal Protein L21 Pseudogene 28	Pseudogene	11	GC01M212051	1.3131	https://www.genecards.org/cgi-bin/carddisp.pl?gene=RPL21P28
UBBP1	Ubiquitin B Pseudogene 1	Pseudogene	8	GC02M136329	1.3131	https://www.genecards.org/cgi-bin/carddisp.pl?gene=UBBP1
PA2G4P5	Proliferation-Associated 2G4 Pseudogene 5	Pseudogene	7	GC06M112615	1.3131	https://www.genecards.org/cgi-bin/carddisp.pl?gene=PA2G4P5
MRPL2P1	Mitochondrial Ribosomal Protein L2 Pseudogene 1	Pseudogene	7	GC12P089752	1.3131	https://www.genecards.org/cgi-bin/carddisp.pl?gene=MRPL2P1
SLC25A5P2	Solute Carrier Family 25 Member 5 Pseudogene 2	Pseudogene	7	GC02M033839	1.3131	https://www.genecards.org/cgi-bin/carddisp.pl?gene=SLC25A5P2
RPS12P4	Ribosomal Protein S12 Pseudogene 4	Pseudogene	7	GC02M041850	1.3131	https://www.genecards.org/cgi-bin/carddisp.pl?gene=RPS12P4
ADH5P2	ADH5 Pseudogene 2	Pseudogene	6	GC01P079521	1.3131	https://www.genecards.org/cgi-bin/carddisp.pl?gene=ADH5P2
HSPA8P1	Heat Shock Protein Family A (Hsp70) Member 8 Pseudogene 1	Pseudogene	6	GC0XM121202	1.3131	https://www.genecards.org/cgi-bin/carddisp.pl?gene=HSPA8P1
RPL18P5	Ribosomal Protein L18 Pseudogene 5	Pseudogene	6	GC07P137164	1.3131	https://www.genecards.org/cgi-bin/carddisp.pl?gene=RPL18P5
RPL7P20	Ribosomal Protein L7 Pseudogene 20	Pseudogene	6	GC05M166028	1.3131	https://www.genecards.org/cgi-bin/carddisp.pl?gene=RPL7P20
RPS3AP22	RPS3A Pseudogene 22	Pseudogene	6	GC05P088381	1.3131	https://www.genecards.org/cgi-bin/carddisp.pl?gene=RPS3AP22
RPL17P25	Ribosomal Protein L17 Pseudogene 25	Pseudogene	5	GC06M080373	1.3131	https://www.genecards.org/cgi-bin/carddisp.pl?gene=RPL17P25
RPL13AP15	Ribosomal Protein L13a Pseudogene 15	Pseudogene	5	GC06M119270	1.3131	https://www.genecards.org/cgi-bin/carddisp.pl?gene=RPL13AP15
RPL7AP56	Ribosomal Protein L7a Pseudogene 56	Pseudogene	5	GC11P037748	1.3131	https://www.genecards.org/cgi-bin/carddisp.pl?gene=RPL7AP56
KCNQ4	Potassium Voltage-Gated Channel Subfamily Q Member 4	Protein Coding	44	GC01P040784	1.31294	https://www.genecards.org/cgi-bin/carddisp.pl?gene=KCNQ4
PDE4A	Phosphodiesterase 4A	Protein Coding	44	GC19P010416	1.31066	https://www.genecards.org/cgi-bin/carddisp.pl?gene=PDE4A
SNORD116@	Small Nucleolar RNA, C/D Box 116 Cluster	Gene Cluster	6	GC15P025051	1.31063	https://www.genecards.org/cgi-bin/carddisp.pl?gene=SNORD116%40
PRKCD	Protein Kinase C Delta	Protein Coding	53	GC03P053156	1.30907	https://www.genecards.org/cgi-bin/carddisp.pl?gene=PRKCD
RELA	RELA Proto-Oncogene, NF-KB Subunit	Protein Coding	50	GC11M065653	1.30907	https://www.genecards.org/cgi-bin/carddisp.pl?gene=RELA
ADSL	Adenylosuccinate Lyase	Protein Coding	46	GC22P040346	1.30907	https://www.genecards.org/cgi-bin/carddisp.pl?gene=ADSL
EPHB1	EPH Receptor B1	Protein Coding	46	GC03P134795	1.30907	https://www.genecards.org/cgi-bin/carddisp.pl?gene=EPHB1
ALDH6A1	Aldehyde Dehydrogenase 6 Family Member A1	Protein Coding	45	GC14M074059	1.30907	https://www.genecards.org/cgi-bin/carddisp.pl?gene=ALDH6A1
CNTN2	Contactin 2	Protein Coding	45	GC01P205043	1.30907	https://www.genecards.org/cgi-bin/carddisp.pl?gene=CNTN2
ISG15	ISG15 Ubiquitin Like Modifier	Protein Coding	45	GC01P001001	1.30907	https://www.genecards.org/cgi-bin/carddisp.pl?gene=ISG15
FOXP1	Forkhead Box P1	Protein Coding	45	GC03M070926	1.30907	https://www.genecards.org/cgi-bin/carddisp.pl?gene=FOXP1
NRG1	Neuregulin 1	Protein Coding	45	GC08P031639	1.30907	https://www.genecards.org/cgi-bin/carddisp.pl?gene=NRG1
EIF2B2	Eukaryotic Translation Initiation Factor 2B Subunit Beta	Protein Coding	44	GC14P075002	1.30907	https://www.genecards.org/cgi-bin/carddisp.pl?gene=EIF2B2
DLX5	Distal-Less Homeobox 5	Protein Coding	44	GC07M097020	1.30907	https://www.genecards.org/cgi-bin/carddisp.pl?gene=DLX5
CYP51A1	Cytochrome P450 Family 51 Subfamily A Member 1	Protein Coding	44	GC07M092112	1.30907	https://www.genecards.org/cgi-bin/carddisp.pl?gene=CYP51A1
PBRM1	Polybromo 1	Protein Coding	44	GC03M052545	1.30907	https://www.genecards.org/cgi-bin/carddisp.pl?gene=PBRM1
CCS	Copper Chaperone For Superoxide Dismutase	Protein Coding	42	GC11P066593	1.30907	https://www.genecards.org/cgi-bin/carddisp.pl?gene=CCS
APH1A	Aph-1 Homolog A, Gamma-Secretase Subunit	Protein Coding	42	GC01M150265	1.30907	https://www.genecards.org/cgi-bin/carddisp.pl?gene=APH1A
CA14	Carbonic Anhydrase 14	Protein Coding	42	GC01P150258	1.30907	https://www.genecards.org/cgi-bin/carddisp.pl?gene=CA14
NCK2	NCK Adaptor Protein 2	Protein Coding	42	GC02P105744	1.30907	https://www.genecards.org/cgi-bin/carddisp.pl?gene=NCK2
MLH3	MutL Homolog 3	Protein Coding	42	GC14M075013	1.30907	https://www.genecards.org/cgi-bin/carddisp.pl?gene=MLH3
MANBA	Mannosidase Beta	Protein Coding	42	GC04M102631	1.30907	https://www.genecards.org/cgi-bin/carddisp.pl?gene=MANBA
MUS81	MUS81 Structure-Specific Endonuclease Subunit	Protein Coding	42	GC11P067135	1.30907	https://www.genecards.org/cgi-bin/carddisp.pl?gene=MUS81
PIGK	Phosphatidylinositol Glycan Anchor Biosynthesis Class K	Protein Coding	42	GC01M077088	1.30907	https://www.genecards.org/cgi-bin/carddisp.pl?gene=PIGK
HTR6	5-Hydroxytryptamine Receptor 6	Protein Coding	42	GC01P019666	1.30907	https://www.genecards.org/cgi-bin/carddisp.pl?gene=HTR6
TARS2	Threonyl-TRNA Synthetase 2, Mitochondrial	Protein Coding	42	GC01P150511	1.30907	https://www.genecards.org/cgi-bin/carddisp.pl?gene=TARS2
PRPF3	Pre-MRNA Processing Factor 3	Protein Coding	42	GC01P150321	1.30907	https://www.genecards.org/cgi-bin/carddisp.pl?gene=PRPF3
ROBO2	Roundabout Guidance Receptor 2	Protein Coding	42	GC03P075955	1.30907	https://www.genecards.org/cgi-bin/carddisp.pl?gene=ROBO2
SLC26A5	Solute Carrier Family 26 Member 5	Protein Coding	42	GC07M103352	1.30907	https://www.genecards.org/cgi-bin/carddisp.pl?gene=SLC26A5
AK5	Adenylate Kinase 5	Protein Coding	41	GC01P077281	1.30907	https://www.genecards.org/cgi-bin/carddisp.pl?gene=AK5
IL1RAPL1	Interleukin 1 Receptor Accessory Protein Like 1	Protein Coding	41	GC0XP028605	1.30907	https://www.genecards.org/cgi-bin/carddisp.pl?gene=IL1RAPL1
FANCE	FA Complementation Group E	Protein Coding	41	GC06P061293	1.30907	https://www.genecards.org/cgi-bin/carddisp.pl?gene=FANCE
NISCH	Nischarin	Protein Coding	41	GC03P052455	1.30907	https://www.genecards.org/cgi-bin/carddisp.pl?gene=NISCH
KRIT1	KRIT1 Ankyrin Repeat Containing	Protein Coding	41	GC07M092198	1.30907	https://www.genecards.org/cgi-bin/carddisp.pl?gene=KRIT1
NFASC	Neurofascin	Protein Coding	41	GC01P204828	1.30907	https://www.genecards.org/cgi-bin/carddisp.pl?gene=NFASC
VAMP3	Vesicle Associated Membrane Protein 3	Protein Coding	41	GC01P007765	1.30907	https://www.genecards.org/cgi-bin/carddisp.pl?gene=VAMP3
CRB2	Crumbs Cell Polarity Complex Component 2	Protein Coding	40	GC09P123356	1.30907	https://www.genecards.org/cgi-bin/carddisp.pl?gene=CRB2
GNL3	G Protein Nucleolar 3	Protein Coding	40	GC03P052681	1.30907	https://www.genecards.org/cgi-bin/carddisp.pl?gene=GNL3
PACS1	Phosphofurin Acidic Cluster Sorting Protein 1	Protein Coding	40	GC11P067169	1.30907	https://www.genecards.org/cgi-bin/carddisp.pl?gene=PACS1
POLR2J	RNA Polymerase II Subunit J	Protein Coding	40	GC07M102473	1.30907	https://www.genecards.org/cgi-bin/carddisp.pl?gene=POLR2J
SART1	Spliceosome Associated Factor 1, Recruiter Of U4/U6.U5 Tri-SnRNP	Protein Coding	40	GC11P067155	1.30907	https://www.genecards.org/cgi-bin/carddisp.pl?gene=SART1
ACYP2	Acylphosphatase 2	Protein Coding	39	GC02P053970	1.30907	https://www.genecards.org/cgi-bin/carddisp.pl?gene=ACYP2
ARHGAP15	Rho GTPase Activating Protein 15	Protein Coding	39	GC02P143070	1.30907	https://www.genecards.org/cgi-bin/carddisp.pl?gene=ARHGAP15
PINX1	PIN2 (TERF1) Interacting Telomerase Inhibitor 1	Protein Coding	39	GC08M010764	1.30907	https://www.genecards.org/cgi-bin/carddisp.pl?gene=PINX1
TAF11	TATA-Box Binding Protein Associated Factor 11	Protein Coding	39	GC06M051547	1.30907	https://www.genecards.org/cgi-bin/carddisp.pl?gene=TAF11
VSX2	Visual System Homeobox 2	Protein Coding	39	GC14P074239	1.30907	https://www.genecards.org/cgi-bin/carddisp.pl?gene=VSX2
CD248	CD248 Molecule	Protein Coding	38	GC11M066314	1.30907	https://www.genecards.org/cgi-bin/carddisp.pl?gene=CD248
NBL1	NBL1, DAN Family BMP Antagonist	Protein Coding	38	GC01P019600	1.30907	https://www.genecards.org/cgi-bin/carddisp.pl?gene=NBL1
NPL	N-Acetylneuraminate Pyruvate Lyase	Protein Coding	38	GC01P182758	1.30907	https://www.genecards.org/cgi-bin/carddisp.pl?gene=NPL
PDIA2	Protein Disulfide Isomerase Family A Member 2	Protein Coding	38	GC16P006718	1.30907	https://www.genecards.org/cgi-bin/carddisp.pl?gene=PDIA2
SPDEF	SAM Pointed Domain Containing ETS Transcription Factor	Protein Coding	38	GC06M051546	1.30907	https://www.genecards.org/cgi-bin/carddisp.pl?gene=SPDEF
TRAF3IP1	TRAF3 Interacting Protein 1	Protein Coding	38	GC02P238320	1.30907	https://www.genecards.org/cgi-bin/carddisp.pl?gene=TRAF3IP1
RIN1	Ras And Rab Interactor 1	Protein Coding	38	GC11M074583	1.30907	https://www.genecards.org/cgi-bin/carddisp.pl?gene=RIN1
RNF10	Ring Finger Protein 10	Protein Coding	38	GC12P120555	1.30907	https://www.genecards.org/cgi-bin/carddisp.pl?gene=RNF10
SF3B2	Splicing Factor 3b Subunit 2	Protein Coding	38	GC11P066050	1.30907	https://www.genecards.org/cgi-bin/carddisp.pl?gene=SF3B2
PLCL1	Phospholipase C Like 1 (Inactive)	Protein Coding	38	GC02P197804	1.30907	https://www.genecards.org/cgi-bin/carddisp.pl?gene=PLCL1
SSH3	Slingshot Protein Phosphatase 3	Protein Coding	38	GC11P067303	1.30907	https://www.genecards.org/cgi-bin/carddisp.pl?gene=SSH3
UNC5D	Unc-5 Netrin Receptor D	Protein Coding	38	GC08P035235	1.30907	https://www.genecards.org/cgi-bin/carddisp.pl?gene=UNC5D
DNAJC2	DnaJ Heat Shock Protein Family (Hsp40) Member C2	Protein Coding	37	GC07M103312	1.30907	https://www.genecards.org/cgi-bin/carddisp.pl?gene=DNAJC2
BTBD10	BTB Domain Containing 10	Protein Coding	37	GC11M013387	1.30907	https://www.genecards.org/cgi-bin/carddisp.pl?gene=BTBD10
ASB1	Ankyrin Repeat And SOCS Box Containing 1	Protein Coding	37	GC02P238426	1.30907	https://www.genecards.org/cgi-bin/carddisp.pl?gene=ASB1
BOLL	Boule Homolog, RNA Binding Protein	Protein Coding	37	GC02M197726	1.30907	https://www.genecards.org/cgi-bin/carddisp.pl?gene=BOLL
ERI1	Exoribonuclease 1	Protein Coding	37	GC08P008892	1.30907	https://www.genecards.org/cgi-bin/carddisp.pl?gene=ERI1
GLT8D1	Glycosyltransferase 8 Domain Containing 1	Protein Coding	37	GC03M052694	1.30907	https://www.genecards.org/cgi-bin/carddisp.pl?gene=GLT8D1
DENND1A	DENN Domain Containing 1A	Protein Coding	37	GC09M123379	1.30907	https://www.genecards.org/cgi-bin/carddisp.pl?gene=DENND1A
DRG2	Developmentally Regulated GTP Binding Protein 2	Protein Coding	37	GC17P018088	1.30907	https://www.genecards.org/cgi-bin/carddisp.pl?gene=DRG2
ORAI2	ORAI Calcium Release-Activated Calcium Modulator 2	Protein Coding	37	GC07P102433	1.30907	https://www.genecards.org/cgi-bin/carddisp.pl?gene=ORAI2
PHACTR1	Phosphatase And Actin Regulator 1	Protein Coding	37	GC06P012717	1.30907	https://www.genecards.org/cgi-bin/carddisp.pl?gene=PHACTR1
MRPL11	Mitochondrial Ribosomal Protein L11	Protein Coding	37	GC11M074590	1.30907	https://www.genecards.org/cgi-bin/carddisp.pl?gene=MRPL11
MPRIP	Myosin Phosphatase Rho Interacting Protein	Protein Coding	37	GC17P017042	1.30907	https://www.genecards.org/cgi-bin/carddisp.pl?gene=MPRIP
LRRN3	Leucine Rich Repeat Neuronal 3	Protein Coding	37	GC07P111091	1.30907	https://www.genecards.org/cgi-bin/carddisp.pl?gene=LRRN3
RASA4	RAS P21 Protein Activator 4	Protein Coding	37	GC07M102868	1.30907	https://www.genecards.org/cgi-bin/carddisp.pl?gene=RASA4
RAX	Retina And Anterior Neural Fold Homeobox	Protein Coding	37	GC18M059267	1.30907	https://www.genecards.org/cgi-bin/carddisp.pl?gene=RAX
PPM1L	Protein Phosphatase, Mg2+/Mn2+ Dependent 1L	Protein Coding	37	GC03P160755	1.30907	https://www.genecards.org/cgi-bin/carddisp.pl?gene=PPM1L
PTGR2	Prostaglandin Reductase 2	Protein Coding	37	GC14P073862	1.30907	https://www.genecards.org/cgi-bin/carddisp.pl?gene=PTGR2
SNRPC	Small Nuclear Ribonucleoprotein Polypeptide C	Protein Coding	37	GC06P061283	1.30907	https://www.genecards.org/cgi-bin/carddisp.pl?gene=SNRPC
RFT1	RFT1 Homolog	Protein Coding	37	GC03M053071	1.30907	https://www.genecards.org/cgi-bin/carddisp.pl?gene=RFT1
RGS8	Regulator Of G Protein Signaling 8	Protein Coding	37	GC01M182642	1.30907	https://www.genecards.org/cgi-bin/carddisp.pl?gene=RGS8
SGSM3	Small G Protein Signaling Modulator 3	Protein Coding	37	GC22P040370	1.30907	https://www.genecards.org/cgi-bin/carddisp.pl?gene=SGSM3
ZNF76	Zinc Finger Protein 76	Protein Coding	37	GC06P061291	1.30907	https://www.genecards.org/cgi-bin/carddisp.pl?gene=ZNF76
BICC1	BicC Family RNA Binding Protein 1	Protein Coding	36	GC10P058513	1.30907	https://www.genecards.org/cgi-bin/carddisp.pl?gene=BICC1
BRMS1	BRMS1 Transcriptional Repressor And Anoikis Regulator	Protein Coding	36	GC11M074584	1.30907	https://www.genecards.org/cgi-bin/carddisp.pl?gene=BRMS1
GTDC1	Glycosyltransferase Like Domain Containing 1	Protein Coding	36	GC02M143938	1.30907	https://www.genecards.org/cgi-bin/carddisp.pl?gene=GTDC1
HORMAD1	HORMA Domain Containing 1	Protein Coding	36	GC01M150912	1.30907	https://www.genecards.org/cgi-bin/carddisp.pl?gene=HORMAD1
NOL4	Nucleolar Protein 4	Protein Coding	36	GC18M033851	1.30907	https://www.genecards.org/cgi-bin/carddisp.pl?gene=NOL4
MPPED2	Metallophosphoesterase Domain Containing 2	Protein Coding	36	GC11M030406	1.30907	https://www.genecards.org/cgi-bin/carddisp.pl?gene=MPPED2
NUDT3	Nudix Hydrolase 3	Protein Coding	36	GC06M051544	1.30907	https://www.genecards.org/cgi-bin/carddisp.pl?gene=NUDT3
PPP1R3B	Protein Phosphatase 1 Regulatory Subunit 3B	Protein Coding	36	GC08M009136	1.30907	https://www.genecards.org/cgi-bin/carddisp.pl?gene=PPP1R3B
SFMBT1	Scm Like With Four Mbt Domains 1	Protein Coding	36	GC03M052913	1.30907	https://www.genecards.org/cgi-bin/carddisp.pl?gene=SFMBT1
LRWD1	Leucine Rich Repeats And WD Repeat Domain Containing 1	Protein Coding	35	GC07P102464	1.30907	https://www.genecards.org/cgi-bin/carddisp.pl?gene=LRWD1
ANKRD44	Ankyrin Repeat Domain 44	Protein Coding	34	GC02M196967	1.30907	https://www.genecards.org/cgi-bin/carddisp.pl?gene=ANKRD44
ANP32E	Acidic Nuclear Phosphoprotein 32 Family Member E	Protein Coding	34	GC01M150218	1.30907	https://www.genecards.org/cgi-bin/carddisp.pl?gene=ANP32E
ARMC10	Armadillo Repeat Containing 10	Protein Coding	34	GC07P103074	1.30907	https://www.genecards.org/cgi-bin/carddisp.pl?gene=ARMC10
COQ10B	Coenzyme Q10B	Protein Coding	34	GC02P197453	1.30907	https://www.genecards.org/cgi-bin/carddisp.pl?gene=COQ10B
EPC2	Enhancer Of Polycomb Homolog 2	Protein Coding	34	GC02P148644	1.30907	https://www.genecards.org/cgi-bin/carddisp.pl?gene=EPC2
FAM167A	Family With Sequence Similarity 167 Member A	Protein Coding	34	GC08M011421	1.30907	https://www.genecards.org/cgi-bin/carddisp.pl?gene=FAM167A
NMD3	NMD3 Ribosome Export Adaptor	Protein Coding	34	GC03P161104	1.30907	https://www.genecards.org/cgi-bin/carddisp.pl?gene=NMD3
MED9	Mediator Complex Subunit 9	Protein Coding	34	GC17P017476	1.30907	https://www.genecards.org/cgi-bin/carddisp.pl?gene=MED9
MTRF1L	Mitochondrial Translation Release Factor 1 Like	Protein Coding	34	GC06M152987	1.30907	https://www.genecards.org/cgi-bin/carddisp.pl?gene=MTRF1L
MYO15A	Myosin XVA	Protein Coding	34	GC17P018108	1.30907	https://www.genecards.org/cgi-bin/carddisp.pl?gene=MYO15A
RASEF	RAS And EF-Hand Domain Containing	Protein Coding	34	GC09M088470	1.30907	https://www.genecards.org/cgi-bin/carddisp.pl?gene=RASEF
SEC11C	SEC11 Homolog C, Signal Peptidase Complex Subunit	Protein Coding	34	GC18P059139	1.30907	https://www.genecards.org/cgi-bin/carddisp.pl?gene=SEC11C
UHRF1BP1	UHRF1 Binding Protein 1	Protein Coding	34	GC06P061284	1.30907	https://www.genecards.org/cgi-bin/carddisp.pl?gene=UHRF1BP1
MFHAS1	Multifunctional ROCO Family Signaling Regulator 1	Protein Coding	33	GC08M008783	1.30907	https://www.genecards.org/cgi-bin/carddisp.pl?gene=MFHAS1
LRRC17	Leucine Rich Repeat Containing 17	Protein Coding	33	GC07P102912	1.30907	https://www.genecards.org/cgi-bin/carddisp.pl?gene=LRRC17
SAMD11	Sterile Alpha Motif Domain Containing 11	Protein Coding	33	GC01P002475	1.30907	https://www.genecards.org/cgi-bin/carddisp.pl?gene=SAMD11
RFTN2	Raftlin Family Member 2	Protein Coding	33	GC02M197568	1.30907	https://www.genecards.org/cgi-bin/carddisp.pl?gene=RFTN2
ZNF410	Zinc Finger Protein 410	Protein Coding	33	GC14P073886	1.30907	https://www.genecards.org/cgi-bin/carddisp.pl?gene=ZNF410
ZCCHC2	Zinc Finger CCHC-Type Containing 2	Protein Coding	33	GC18P062523	1.30907	https://www.genecards.org/cgi-bin/carddisp.pl?gene=ZCCHC2
EIF1AD	Eukaryotic Translation Initiation Factor 1A Domain Containing	Protein Coding	32	GC11M065996	1.30907	https://www.genecards.org/cgi-bin/carddisp.pl?gene=EIF1AD
EHBP1L1	EH Domain Binding Protein 1 Like 1	Protein Coding	32	GC11P067104	1.30907	https://www.genecards.org/cgi-bin/carddisp.pl?gene=EHBP1L1
ANKIB1	Ankyrin Repeat And IBR Domain Containing 1	Protein Coding	32	GC07P092246	1.30907	https://www.genecards.org/cgi-bin/carddisp.pl?gene=ANKIB1
FCF1	FCF1 RRNA-Processing Protein	Protein Coding	32	GC14P074713	1.30907	https://www.genecards.org/cgi-bin/carddisp.pl?gene=FCF1
FRMD8	FERM Domain Containing 8	Protein Coding	32	GC11P065386	1.30907	https://www.genecards.org/cgi-bin/carddisp.pl?gene=FRMD8
NRARP	NOTCH Regulated Ankyrin Repeat Protein	Protein Coding	32	GC09M137299	1.30907	https://www.genecards.org/cgi-bin/carddisp.pl?gene=NRARP
LIN52	Lin-52 DREAM MuvB Core Complex Component	Protein Coding	32	GC14P074084	1.30907	https://www.genecards.org/cgi-bin/carddisp.pl?gene=LIN52
PRKRIP1	PRKR Interacting Protein 1	Protein Coding	32	GC07P102602	1.30907	https://www.genecards.org/cgi-bin/carddisp.pl?gene=PRKRIP1
RNF157	Ring Finger Protein 157	Protein Coding	32	GC17M076142	1.30907	https://www.genecards.org/cgi-bin/carddisp.pl?gene=RNF157
XKR6	XK Related 6	Protein Coding	32	GC08M010896	1.30907	https://www.genecards.org/cgi-bin/carddisp.pl?gene=XKR6
YLPM1	YLP Motif Containing 1	Protein Coding	32	GC14P074763	1.30907	https://www.genecards.org/cgi-bin/carddisp.pl?gene=YLPM1
DNAJC16	DnaJ Heat Shock Protein Family (Hsp40) Member C16	Protein Coding	31	GC01P015526	1.30907	https://www.genecards.org/cgi-bin/carddisp.pl?gene=DNAJC16
FBXO34	F-Box Protein 34	Protein Coding	31	GC14P055271	1.30907	https://www.genecards.org/cgi-bin/carddisp.pl?gene=FBXO34
ETAA1	ETAA1 Activator Of ATR Kinase	Protein Coding	31	GC02P067397	1.30907	https://www.genecards.org/cgi-bin/carddisp.pl?gene=ETAA1
EXD3	Exonuclease 3'-5' Domain Containing 3	Protein Coding	31	GC09M137306	1.30907	https://www.genecards.org/cgi-bin/carddisp.pl?gene=EXD3
PATJ	PATJ Crumbs Cell Polarity Complex Component	Protein Coding	31	GC01P061743	1.30907	https://www.genecards.org/cgi-bin/carddisp.pl?gene=PATJ
SEM1	SEM1 26S Proteasome Subunit	Protein Coding	31	GC07M096483	1.30907	https://www.genecards.org/cgi-bin/carddisp.pl?gene=SEM1
SPTSSB	Serine Palmitoyltransferase Small Subunit B	Protein Coding	31	GC03M161344	1.30907	https://www.genecards.org/cgi-bin/carddisp.pl?gene=SPTSSB
CPLX4	Complexin 4	Protein Coding	30	GC18M059275	1.30907	https://www.genecards.org/cgi-bin/carddisp.pl?gene=CPLX4
HIKESHI	Heat Shock Protein Nuclear Import Factor Hikeshi	Protein Coding	30	GC11P086303	1.30907	https://www.genecards.org/cgi-bin/carddisp.pl?gene=HIKESHI
RGSL1	Regulator Of G Protein Signaling Like 1	Protein Coding	30	GC01P182409	1.30907	https://www.genecards.org/cgi-bin/carddisp.pl?gene=RGSL1
SMCR8	SMCR8-C9orf72 Complex Subunit	Protein Coding	30	GC17P031401	1.30907	https://www.genecards.org/cgi-bin/carddisp.pl?gene=SMCR8
FAM166A	Family With Sequence Similarity 166 Member A	Protein Coding	29	GC09M137243	1.30907	https://www.genecards.org/cgi-bin/carddisp.pl?gene=FAM166A
SPTY2D1	SPT2 Chromatin Protein Domain Containing 1	Protein Coding	29	GC11M018627	1.30907	https://www.genecards.org/cgi-bin/carddisp.pl?gene=SPTY2D1
GFRAL	GDNF Family Receptor Alpha Like	Protein Coding	28	GC06P061510	1.30907	https://www.genecards.org/cgi-bin/carddisp.pl?gene=GFRAL
POLR2J3	RNA Polymerase II Subunit J3	Protein Coding	28	GC07M102537	1.30907	https://www.genecards.org/cgi-bin/carddisp.pl?gene=POLR2J3
TMEM151A	Transmembrane Protein 151A	Protein Coding	28	GC11P066291	1.30907	https://www.genecards.org/cgi-bin/carddisp.pl?gene=TMEM151A
ZNRD2	Zinc Ribbon Domain Containing 2	Protein Coding	28	GC11P067103	1.30907	https://www.genecards.org/cgi-bin/carddisp.pl?gene=ZNRD2
C1orf54	Chromosome 1 Open Reading Frame 54	Protein Coding	27	GC01P150268	1.30907	https://www.genecards.org/cgi-bin/carddisp.pl?gene=C1orf54
FAM185A	Family With Sequence Similarity 185 Member A	Protein Coding	27	GC07P102748	1.30907	https://www.genecards.org/cgi-bin/carddisp.pl?gene=FAM185A
ILRUN	Inflammation And Lipid Regulator With UBA-Like And NBR1-Like Domains	Protein Coding	25	GC06M052237	1.30907	https://www.genecards.org/cgi-bin/carddisp.pl?gene=ILRUN
RASA4B	RAS P21 Protein Activator 4B	Protein Coding	25	GC07M102482	1.30907	https://www.genecards.org/cgi-bin/carddisp.pl?gene=RASA4B
WDCP	WD Repeat And Coiled Coil Containing	Protein Coding	25	GC02M024032	1.30907	https://www.genecards.org/cgi-bin/carddisp.pl?gene=WDCP
PCNX3	Pecanex 3	Protein Coding	24	GC11P067105	1.30907	https://www.genecards.org/cgi-bin/carddisp.pl?gene=PCNX3
MIDEAS	Mitotic Deacetylase Associated SANT Domain Protein	Protein Coding	23	GC14M073775	1.30907	https://www.genecards.org/cgi-bin/carddisp.pl?gene=MIDEAS
MALAT1	Metastasis Associated Lung Adenocarcinoma Transcript 1	RNA Gene	23	GC11P067097	1.30907	https://www.genecards.org/cgi-bin/carddisp.pl?gene=MALAT1
OR4F16	Olfactory Receptor Family 4 Subfamily F Member 16	Protein Coding	22	GC01M003365	1.30907	https://www.genecards.org/cgi-bin/carddisp.pl?gene=OR4F16
DPY19L2P2	DPY19L2 Pseudogene 2	Pseudogene	20	GC07M103175	1.30907	https://www.genecards.org/cgi-bin/carddisp.pl?gene=DPY19L2P2
LINC00115	Long Intergenic Non-Protein Coding RNA 115	RNA Gene	18	GC01M003425	1.30907	https://www.genecards.org/cgi-bin/carddisp.pl?gene=LINC00115
MIR1284	MicroRNA 1284	RNA Gene	16	GC03M071541	1.30907	https://www.genecards.org/cgi-bin/carddisp.pl?gene=MIR1284
FAM41C	Family With Sequence Similarity 41 Member C	RNA Gene	15	GC01M003433	1.30907	https://www.genecards.org/cgi-bin/carddisp.pl?gene=FAM41C
CD8B2	CD8b2 Molecule	Protein Coding	14	GC02P106487	1.30907	https://www.genecards.org/cgi-bin/carddisp.pl?gene=CD8B2
LINC01128	Long Intergenic Non-Protein Coding RNA 1128	RNA Gene	14	GC01P002471	1.30907	https://www.genecards.org/cgi-bin/carddisp.pl?gene=LINC01128
FOXP1-IT1	FOXP1 Intronic Transcript 1	RNA Gene	13	GC03M071570	1.30907	https://www.genecards.org/cgi-bin/carddisp.pl?gene=FOXP1-IT1
MEIS1-AS2	MEIS1 Antisense RNA 2	RNA Gene	13	GC02M066439	1.30907	https://www.genecards.org/cgi-bin/carddisp.pl?gene=MEIS1-AS2
NRG1-IT1	NRG1 Intronic Transcript 1	RNA Gene	12	GC08P032025	1.30907	https://www.genecards.org/cgi-bin/carddisp.pl?gene=NRG1-IT1
LINC01107	Long Intergenic Non-Protein Coding RNA 1107	RNA Gene	12	GC02M238512	1.30907	https://www.genecards.org/cgi-bin/carddisp.pl?gene=LINC01107
MIR4660	MicroRNA 4660	RNA Gene	12	GC08P009048	1.30907	https://www.genecards.org/cgi-bin/carddisp.pl?gene=MIR4660
LINC01322	Long Intergenic Non-Protein Coding RNA 1322	RNA Gene	12	GC03P165206	1.30907	https://www.genecards.org/cgi-bin/carddisp.pl?gene=LINC01322
LINC01470	Long Intergenic Non-Protein Coding RNA 1470	RNA Gene	11	GC05M152618	1.30907	https://www.genecards.org/cgi-bin/carddisp.pl?gene=LINC01470
FAM86B3P	Family With Sequence Similarity 86 Member B3, Pseudogene	Pseudogene	10	GC08P008228	1.30907	https://www.genecards.org/cgi-bin/carddisp.pl?gene=FAM86B3P
LINC02067	Long Intergenic Non-Protein Coding RNA 2067	RNA Gene	10	GC03P161428	1.30907	https://www.genecards.org/cgi-bin/carddisp.pl?gene=LINC02067
MIR548A1HG	MIR548A1 Host Gene	RNA Gene	10	GC06P018525	1.30907	https://www.genecards.org/cgi-bin/carddisp.pl?gene=MIR548A1HG
LINC01933	Long Intergenic Non-Protein Coding RNA 1933	RNA Gene	10	GC05P151925	1.30907	https://www.genecards.org/cgi-bin/carddisp.pl?gene=LINC01933
LINC01241	Long Intergenic Non-Protein Coding RNA 1241	RNA Gene	10	GC09P025782	1.30907	https://www.genecards.org/cgi-bin/carddisp.pl?gene=LINC01241
LINC02609	Long Intergenic Non-Protein Coding RNA 2609	RNA Gene	9	GC01M090783	1.30907	https://www.genecards.org/cgi-bin/carddisp.pl?gene=LINC02609
SMIM40	Small Integral Membrane Protein 40	Protein Coding	9	GC06M051513	1.30907	https://www.genecards.org/cgi-bin/carddisp.pl?gene=SMIM40
TWF2-DT	TWF2 Divergent Transcript	RNA Gene	9	GC03P052242	1.30907	https://www.genecards.org/cgi-bin/carddisp.pl?gene=TWF2-DT
LOC101928626	Uncharacterized LOC101928626	RNA Gene	9	GC01M003354	1.30907	https://www.genecards.org/cgi-bin/carddisp.pl?gene=LOC101928626
LOC102724064	Uncharacterized LOC102724064	RNA Gene	9	GC11P067190	1.30907	https://www.genecards.org/cgi-bin/carddisp.pl?gene=LOC102724064
CRYZP1	Crystallin Zeta Pseudogene 1	Pseudogene	8	GC07M103087	1.30907	https://www.genecards.org/cgi-bin/carddisp.pl?gene=CRYZP1
ILRUN-AS1	ILRUN Antisense RNA 1	RNA Gene	8	GC06P062129	1.30907	https://www.genecards.org/cgi-bin/carddisp.pl?gene=ILRUN-AS1
HMGN1P1	High Mobility Group Nucleosome Binding Domain 1 Pseudogene 1	Pseudogene	8	GC14M055394	1.30907	https://www.genecards.org/cgi-bin/carddisp.pl?gene=HMGN1P1
LINC01688	Long Intergenic Non-Protein Coding RNA 1688	RNA Gene	8	GC01P182713	1.30907	https://www.genecards.org/cgi-bin/carddisp.pl?gene=LINC01688
ENSG00000224984	Novel Transcript	RNA Gene	8	GC06M054840	1.30907	https://www.genecards.org/cgi-bin/carddisp.pl?gene=ENSG00000224984
ENSG00000228655	Novel Transcript, Antisense To ARHGAP15	RNA Gene	8	GC02M143295	1.30907	https://www.genecards.org/cgi-bin/carddisp.pl?gene=ENSG00000228655
ENSG00000243107	Novel Transcript	RNA Gene	8	GC07M092200	1.30907	https://www.genecards.org/cgi-bin/carddisp.pl?gene=ENSG00000243107
ENSG00000245156	Novel Transcript	RNA Gene	8	GC11M066269	1.30907	https://www.genecards.org/cgi-bin/carddisp.pl?gene=ENSG00000245156
ENSG00000254458	Novel Transcript	RNA Gene	8	GC11P067189	1.30907	https://www.genecards.org/cgi-bin/carddisp.pl?gene=ENSG00000254458
ENSG00000255310	Novel Transcript	RNA Gene	8	GC08M011107	1.30907	https://www.genecards.org/cgi-bin/carddisp.pl?gene=ENSG00000255310
ENSG00000261116	Novel Transcript, Overlapping To FAM83B	RNA Gene	8	GC06P054943	1.30907	https://www.genecards.org/cgi-bin/carddisp.pl?gene=ENSG00000261116
ENSG00000254855	Novel Transcript	RNA Gene	8	GC11M066264	1.30907	https://www.genecards.org/cgi-bin/carddisp.pl?gene=ENSG00000254855
ENSG00000255038	Novel Transcript, Antisense To SF3B2	RNA Gene	8	GC11M066067	1.30907	https://www.genecards.org/cgi-bin/carddisp.pl?gene=ENSG00000255038
ENSG00000258413	Novel Transcript	RNA Gene	8	GC14M055262	1.30907	https://www.genecards.org/cgi-bin/carddisp.pl?gene=ENSG00000258413
ENSG00000265511	Novel Transcript	RNA Gene	8	GC17P017507	1.30907	https://www.genecards.org/cgi-bin/carddisp.pl?gene=ENSG00000265511
ENSG00000255320	Novel Transcript	RNA Gene	8	GC11M074566	1.30907	https://www.genecards.org/cgi-bin/carddisp.pl?gene=ENSG00000255320
RNU6-1136P	RNA, U6 Small Nuclear 1136, Pseudogene	Pseudogene	7	GC07P102834	1.30907	https://www.genecards.org/cgi-bin/carddisp.pl?gene=RNU6-1136P
SNORD13C	Small Nucleolar RNA, C/D Box 13C	RNA Gene	7	GC01P150262	1.30907	https://www.genecards.org/cgi-bin/carddisp.pl?gene=SNORD13C
RNU6-1029P	RNA, U6 Small Nuclear 1029, Pseudogene	Pseudogene	7	GC02P197447	1.30907	https://www.genecards.org/cgi-bin/carddisp.pl?gene=RNU6-1029P
SERBP1P3	SERPINE1 MRNA Binding Protein 1 Pseudogene 3	Pseudogene	7	GC03M053058	1.30907	https://www.genecards.org/cgi-bin/carddisp.pl?gene=SERBP1P3
ENSG00000269918	Novel Transcript	RNA Gene	7	GC08M011104	1.30907	https://www.genecards.org/cgi-bin/carddisp.pl?gene=ENSG00000269918
ENSG00000272374	Novel Transcript, Antisense To SCUBE3	RNA Gene	7	GC06M051550	1.30907	https://www.genecards.org/cgi-bin/carddisp.pl?gene=ENSG00000272374
UPF3AP1	UPF3A Pseudogene 1	Pseudogene	7	GC17M016746	1.30907	https://www.genecards.org/cgi-bin/carddisp.pl?gene=UPF3AP1
ENSG00000260647	Novel Transcript, Antisense To TOP3A	RNA Gene	7	GC17P018268	1.30907	https://www.genecards.org/cgi-bin/carddisp.pl?gene=ENSG00000260647
ENSG00000259065	Novel Transcript, Antisense To C14orf43	Uncategorized	7	GC14P073788	1.30907	https://www.genecards.org/cgi-bin/carddisp.pl?gene=ENSG00000259065
ENSG00000236453	Novel Transcript	RNA Gene	7	GC07P094022	1.30907	https://www.genecards.org/cgi-bin/carddisp.pl?gene=ENSG00000236453
ENSG00000236938	Novel Transcript	RNA Gene	7	GC07M094071	1.30907	https://www.genecards.org/cgi-bin/carddisp.pl?gene=ENSG00000236938
ENSG00000202434		RNA Gene	7	GC02P197405	1.30907	https://www.genecards.org/cgi-bin/carddisp.pl?gene=ENSG00000202434
EEF1GP4	Eukaryotic Translation Elongation Factor 1 Gamma Pseudogene 4	Pseudogene	6	GC03M161324	1.30907	https://www.genecards.org/cgi-bin/carddisp.pl?gene=EEF1GP4
NPM1P22	Nucleophosmin 1 Pseudogene 22	Pseudogene	6	GC13M067831	1.30907	https://www.genecards.org/cgi-bin/carddisp.pl?gene=NPM1P22
OR7E111P	Olfactory Receptor Family 7 Subfamily E Member 111 Pseudogene	Pseudogene	6	GC13P067902	1.30907	https://www.genecards.org/cgi-bin/carddisp.pl?gene=OR7E111P
LINC02840	Long Intergenic Non-Protein Coding RNA 2840	RNA Gene	6	GC06M152754	1.30907	https://www.genecards.org/cgi-bin/carddisp.pl?gene=LINC02840
MARK2P10	Microtubule Affinity Regulating Kinase 2 Pseudogene 10	Pseudogene	6	GC07P096858	1.30907	https://www.genecards.org/cgi-bin/carddisp.pl?gene=MARK2P10
RSL24D1P5	Ribosomal L24 Domain Containing 1 Pseudogene 5	Pseudogene	6	GC12M063055	1.30907	https://www.genecards.org/cgi-bin/carddisp.pl?gene=RSL24D1P5
SNORD3I	Small Nucleolar RNA, C/D Box 3I	RNA Gene	6	GC08M009059	1.30907	https://www.genecards.org/cgi-bin/carddisp.pl?gene=SNORD3I
RPL7P13	Ribosomal Protein L7 Pseudogene 13	Pseudogene	6	GC02P049931	1.30907	https://www.genecards.org/cgi-bin/carddisp.pl?gene=RPL7P13
RPL7AP39	Ribosomal Protein L7a Pseudogene 39	Pseudogene	6	GC07P102757	1.30907	https://www.genecards.org/cgi-bin/carddisp.pl?gene=RPL7AP39
RNU6-234P	RNA, U6 Small Nuclear 234, Pseudogene	Pseudogene	6	GC02P238412	1.30907	https://www.genecards.org/cgi-bin/carddisp.pl?gene=RNU6-234P
ENSG00000269925	Novel Transcript, Sense Intronic To VAMP3	RNA Gene	6	GC01P007776	1.30907	https://www.genecards.org/cgi-bin/carddisp.pl?gene=ENSG00000269925
ENSG00000285708	Novel Protein	Protein Coding	6	GC03M070959	1.30907	https://www.genecards.org/cgi-bin/carddisp.pl?gene=ENSG00000285708
ENSG00000226965	Novel Transcript	RNA Gene	6	GC07M110072	1.30907	https://www.genecards.org/cgi-bin/carddisp.pl?gene=ENSG00000226965
LOC100419436	Ribosomal Protein S2 Pseudogene	Pseudogene	6	GC17P018010	1.30907	https://www.genecards.org/cgi-bin/carddisp.pl?gene=LOC100419436
ENSG00000254936	Novel Transcript	RNA Gene	6	GC08M011123	1.30907	https://www.genecards.org/cgi-bin/carddisp.pl?gene=ENSG00000254936
EEF1A1P12	Eukaryotic Translation Elongation Factor 1 Alpha 1 Pseudogene 12	Pseudogene	5	GC02M106697	1.30907	https://www.genecards.org/cgi-bin/carddisp.pl?gene=EEF1A1P12
ACTG1P24	Actin Gamma 1 Pseudogene 24	Pseudogene	5	GC17P017400	1.30907	https://www.genecards.org/cgi-bin/carddisp.pl?gene=ACTG1P24
FAM71BP1	Family With Sequence Similarity 71 Member B Pseudogene 1	Pseudogene	5	GC09P025938	1.30907	https://www.genecards.org/cgi-bin/carddisp.pl?gene=FAM71BP1
RPL10P19	Ribosomal Protein L10 Pseudogene 19	Pseudogene	5	GC08P008969	1.30907	https://www.genecards.org/cgi-bin/carddisp.pl?gene=RPL10P19
RPL23AP95	Ribosomal Protein L23a Pseudogene 95	Pseudogene	5	GC07M103153	1.30907	https://www.genecards.org/cgi-bin/carddisp.pl?gene=RPL23AP95
RN7SL714P	RNA, 7SL, Cytoplasmic 714, Pseudogene	Pseudogene	5	GC14M098351	1.30907	https://www.genecards.org/cgi-bin/carddisp.pl?gene=RN7SL714P
RNA5SP228	RNA, 5S Ribosomal Pseudogene 228	Pseudogene	5	GC07P024133	1.30907	https://www.genecards.org/cgi-bin/carddisp.pl?gene=RNA5SP228
RNU6-400P	RNA, U6 Small Nuclear 400, Pseudogene	Pseudogene	5	GC12P033577	1.30907	https://www.genecards.org/cgi-bin/carddisp.pl?gene=RNU6-400P
RNU6-472P	RNA, U6 Small Nuclear 472, Pseudogene	Pseudogene	5	GC12M033923	1.30907	https://www.genecards.org/cgi-bin/carddisp.pl?gene=RNU6-472P
SRSF6P2	SRSF6 Pseudogene 2	Pseudogene	5	GC17M016635	1.30907	https://www.genecards.org/cgi-bin/carddisp.pl?gene=SRSF6P2
ENSG00000286131	Novel Protein	Protein Coding	5	GC08P032647	1.30907	https://www.genecards.org/cgi-bin/carddisp.pl?gene=ENSG00000286131
lnc-CLDN23-8		RNA Gene	5	GC08P009020	1.30907	https://www.genecards.org/cgi-bin/carddisp.pl?gene=lnc-CLDN23-8
lnc-ENTPD8-2		RNA Gene	5	GC09M137367	1.30907	https://www.genecards.org/cgi-bin/carddisp.pl?gene=lnc-ENTPD8-2
lnc-SPRED2-19		RNA Gene	5	GC02M066548	1.30907	https://www.genecards.org/cgi-bin/carddisp.pl?gene=lnc-SPRED2-19
CLUHP8	Clustered Mitochondria Homolog Pseudogene 8	Pseudogene	4	GC12P038082	1.30907	https://www.genecards.org/cgi-bin/carddisp.pl?gene=CLUHP8
PHBP21	Prohibitin Pseudogene 21	Pseudogene	4	GC16P052934	1.30907	https://www.genecards.org/cgi-bin/carddisp.pl?gene=PHBP21
SRSF3P1	SRSF3 Pseudogene 1	Pseudogene	4	GC11P018664	1.30907	https://www.genecards.org/cgi-bin/carddisp.pl?gene=SRSF3P1
ENSG00000285953	Novel Protein	Protein Coding	4	GC07M092131	1.30907	https://www.genecards.org/cgi-bin/carddisp.pl?gene=ENSG00000285953
HSALNG0009912		RNA Gene	4	GC01P204945	1.30907	https://www.genecards.org/cgi-bin/carddisp.pl?gene=HSALNG0009912
HSALNG0007013		RNA Gene	4	GC01P150259	1.30907	https://www.genecards.org/cgi-bin/carddisp.pl?gene=HSALNG0007013
HSALNG0015594		RNA Gene	4	GC02M066550	1.30907	https://www.genecards.org/cgi-bin/carddisp.pl?gene=HSALNG0015594
HSALNG0021378		RNA Gene	4	GC02P197454	1.30907	https://www.genecards.org/cgi-bin/carddisp.pl?gene=HSALNG0021378
ENSG00000276839	Metazoan Signal Recognition Particle RNA	RNA Gene	4	GC01M182576	1.30907	https://www.genecards.org/cgi-bin/carddisp.pl?gene=ENSG00000276839
ENSG00000287870	Novel Transcript	RNA Gene	4	GC01P077229	1.30907	https://www.genecards.org/cgi-bin/carddisp.pl?gene=ENSG00000287870
HSALNG0019310-002		RNA Gene	4	GC02M143248	1.30907	https://www.genecards.org/cgi-bin/carddisp.pl?gene=HSALNG0019310-002
HSALNG0026758		RNA Gene	4	GC03P071461	1.30907	https://www.genecards.org/cgi-bin/carddisp.pl?gene=HSALNG0026758
lnc-KYNU-7		RNA Gene	4	GC02P143515	1.30907	https://www.genecards.org/cgi-bin/carddisp.pl?gene=lnc-KYNU-7
lnc-NOXA1-1		RNA Gene	4	GC09P137378	1.30907	https://www.genecards.org/cgi-bin/carddisp.pl?gene=lnc-NOXA1-1
lnc-LRRD1-4		RNA Gene	4	GC07M092241	1.30907	https://www.genecards.org/cgi-bin/carddisp.pl?gene=lnc-LRRD1-4
lnc-NOC2L-9		RNA Gene	4	GC01M003426	1.30907	https://www.genecards.org/cgi-bin/carddisp.pl?gene=lnc-NOC2L-9
HSALNG0060223-001		RNA Gene	4	GC07P102913	1.30907	https://www.genecards.org/cgi-bin/carddisp.pl?gene=HSALNG0060223-001
HSALNG0060223-002		RNA Gene	4	GC07P102934	1.30907	https://www.genecards.org/cgi-bin/carddisp.pl?gene=HSALNG0060223-002
HSALNG0063445		RNA Gene	4	GC08M011494	1.30907	https://www.genecards.org/cgi-bin/carddisp.pl?gene=HSALNG0063445
MK280269-058		RNA Gene	4	GC06P062488	1.30907	https://www.genecards.org/cgi-bin/carddisp.pl?gene=MK280269-058
NONHSAG035203.2		RNA Gene	4	GC03P053179	1.30907	https://www.genecards.org/cgi-bin/carddisp.pl?gene=NONHSAG035203.2
lnc-UPK3BL2-1		RNA Gene	4	GC07M102484	1.30907	https://www.genecards.org/cgi-bin/carddisp.pl?gene=lnc-UPK3BL2-1
lnc-SF3B1-5		RNA Gene	4	GC02M197452	1.30907	https://www.genecards.org/cgi-bin/carddisp.pl?gene=lnc-SF3B1-5
piR-61101-085		RNA Gene	4	GC11P013289	1.30907	https://www.genecards.org/cgi-bin/carddisp.pl?gene=piR-61101-085
piR-57138-015		RNA Gene	4	GC01M204926	1.30907	https://www.genecards.org/cgi-bin/carddisp.pl?gene=piR-57138-015
piR-44085-015		RNA Gene	4	GC02M143457	1.30907	https://www.genecards.org/cgi-bin/carddisp.pl?gene=piR-44085-015
RF00017-5038		RNA Gene	4	GC06P063764	1.30907	https://www.genecards.org/cgi-bin/carddisp.pl?gene=RF00017-5038
AK6P2	Adenylate Kinase 6 Pseudogene 2	Pseudogene	3	GC12M038079	1.30907	https://www.genecards.org/cgi-bin/carddisp.pl?gene=AK6P2
HSALNG0000041-001		RNA Gene	3	GC01P002590	1.30907	https://www.genecards.org/cgi-bin/carddisp.pl?gene=HSALNG0000041-001
HSALNG0008944		RNA Gene	3	GC01M182778	1.30907	https://www.genecards.org/cgi-bin/carddisp.pl?gene=HSALNG0008944
ENSG00000274346	Novel Zinc Finger Protein Pseudogene	Pseudogene	3	GC02P238789	1.30907	https://www.genecards.org/cgi-bin/carddisp.pl?gene=ENSG00000274346
lnc-PER2-7		RNA Gene	3	GC02M238529	1.30907	https://www.genecards.org/cgi-bin/carddisp.pl?gene=lnc-PER2-7
HSALNG0135545		RNA Gene	3	GC22M051217	1.30907	https://www.genecards.org/cgi-bin/carddisp.pl?gene=HSALNG0135545
lnc-CRB2-4		RNA Gene	3	GC09P123554	1.30907	https://www.genecards.org/cgi-bin/carddisp.pl?gene=lnc-CRB2-4
HSALNG0082763		RNA Gene	3	GC11M013341	1.30907	https://www.genecards.org/cgi-bin/carddisp.pl?gene=HSALNG0082763
HSALNG0060181		RNA Gene	3	GC07P102517	1.30907	https://www.genecards.org/cgi-bin/carddisp.pl?gene=HSALNG0060181
lnc-WRN-10		RNA Gene	3	GC08P032145	1.30907	https://www.genecards.org/cgi-bin/carddisp.pl?gene=lnc-WRN-10
piR-33303-073		RNA Gene	3	GC17M017492	1.30907	https://www.genecards.org/cgi-bin/carddisp.pl?gene=piR-33303-073
MK280144-583		RNA Gene	3	GC06P061505	1.30907	https://www.genecards.org/cgi-bin/carddisp.pl?gene=MK280144-583
piR-48867-002		RNA Gene	3	GC07M102509	1.30907	https://www.genecards.org/cgi-bin/carddisp.pl?gene=piR-48867-002
RF00017-5041		RNA Gene	3	GC06P063766	1.30907	https://www.genecards.org/cgi-bin/carddisp.pl?gene=RF00017-5041
piR-49018		RNA Gene	3	GC22P040219	1.30907	https://www.genecards.org/cgi-bin/carddisp.pl?gene=piR-49018
RF00017-3713		RNA Gene	3	GC03P071520	1.30907	https://www.genecards.org/cgi-bin/carddisp.pl?gene=RF00017-3713
ZNF970P	Zinc Finger Protein 970, Pseudogene	Pseudogene	3	GC12P037541	1.30907	https://www.genecards.org/cgi-bin/carddisp.pl?gene=ZNF970P
SNODB424		RNA Gene	3	GC06P063883	1.30907	https://www.genecards.org/cgi-bin/carddisp.pl?gene=SNODB424
RF00017-7553		RNA Gene	3	GC09P137348	1.30907	https://www.genecards.org/cgi-bin/carddisp.pl?gene=RF00017-7553
LOC107986003	Uncharacterized LOC107986003	RNA Gene	2	GC02M238449	1.30907	https://www.genecards.org/cgi-bin/carddisp.pl?gene=LOC107986003
HSALNG0021401		RNA Gene	2	GC02M198008	1.30907	https://www.genecards.org/cgi-bin/carddisp.pl?gene=HSALNG0021401
HSALNG0000579		RNA Gene	2	GC01P007775	1.30907	https://www.genecards.org/cgi-bin/carddisp.pl?gene=HSALNG0000579
HSALNG0004569		RNA Gene	2	GC01M077246	1.30907	https://www.genecards.org/cgi-bin/carddisp.pl?gene=HSALNG0004569
HSALNG0030254		RNA Gene	2	GC03M161172	1.30907	https://www.genecards.org/cgi-bin/carddisp.pl?gene=HSALNG0030254
LOC105375451	Uncharacterized LOC105375451	RNA Gene	2	GC07M110366	1.30907	https://www.genecards.org/cgi-bin/carddisp.pl?gene=LOC105375451
KR153203-016		RNA Gene	2	GC09P123536	1.30907	https://www.genecards.org/cgi-bin/carddisp.pl?gene=KR153203-016
lnc-BOLL-6		RNA Gene	2	GC02M198007	1.30907	https://www.genecards.org/cgi-bin/carddisp.pl?gene=lnc-BOLL-6
HSALNG0054407-002		RNA Gene	2	GC06M152809	1.30907	https://www.genecards.org/cgi-bin/carddisp.pl?gene=HSALNG0054407-002
HSALNG0060208		RNA Gene	2	GC07P102787	1.30907	https://www.genecards.org/cgi-bin/carddisp.pl?gene=HSALNG0060208
HSALNG0060548		RNA Gene	2	GC07M110379	1.30907	https://www.genecards.org/cgi-bin/carddisp.pl?gene=HSALNG0060548
HSALNG0075408		RNA Gene	2	GC09M137366	1.30907	https://www.genecards.org/cgi-bin/carddisp.pl?gene=HSALNG0075408
HSALNG0102409		RNA Gene	2	GC14P074087	1.30907	https://www.genecards.org/cgi-bin/carddisp.pl?gene=HSALNG0102409
HSALNG0050748		RNA Gene	2	GC06M055178	1.30907	https://www.genecards.org/cgi-bin/carddisp.pl?gene=HSALNG0050748
HSALNG0050750		RNA Gene	2	GC06M055286	1.30907	https://www.genecards.org/cgi-bin/carddisp.pl?gene=HSALNG0050750
HSALNG0063404		RNA Gene	2	GC08P010965	1.30907	https://www.genecards.org/cgi-bin/carddisp.pl?gene=HSALNG0063404
HSALNG0111470		RNA Gene	2	GC16P052776	1.30907	https://www.genecards.org/cgi-bin/carddisp.pl?gene=HSALNG0111470
piR-32214-189		RNA Gene	2	GC14M055326	1.30907	https://www.genecards.org/cgi-bin/carddisp.pl?gene=piR-32214-189
piR-36746-006		RNA Gene	2	GC14M055312	1.30907	https://www.genecards.org/cgi-bin/carddisp.pl?gene=piR-36746-006
NONHSAG029010.2-001		RNA Gene	2	GC02P118316	1.30907	https://www.genecards.org/cgi-bin/carddisp.pl?gene=NONHSAG029010.2-001
piR-43107-277		RNA Gene	2	GC07P102518	1.30907	https://www.genecards.org/cgi-bin/carddisp.pl?gene=piR-43107-277
piR-58312		RNA Gene	2	GC14P074086	1.30907	https://www.genecards.org/cgi-bin/carddisp.pl?gene=piR-58312
MK279975		RNA Gene	2	GC01P150265	1.30907	https://www.genecards.org/cgi-bin/carddisp.pl?gene=MK279975
piR-39488-029		RNA Gene	2	GC01M182742	1.30907	https://www.genecards.org/cgi-bin/carddisp.pl?gene=piR-39488-029
piR-46847-250		RNA Gene	2	GC07P110321	1.30907	https://www.genecards.org/cgi-bin/carddisp.pl?gene=piR-46847-250
RF00017-290		RNA Gene	2	GC01M150485	1.30907	https://www.genecards.org/cgi-bin/carddisp.pl?gene=RF00017-290
LOC105379241	Uncharacterized LOC105379241	RNA Gene	2	GC08M011554	1.30907	https://www.genecards.org/cgi-bin/carddisp.pl?gene=LOC105379241
LOC105378808	Uncharacterized LOC105378808	RNA Gene	2	GC01P077219	1.30907	https://www.genecards.org/cgi-bin/carddisp.pl?gene=LOC105378808
LOC105374186	Uncharacterized LOC105374186	RNA Gene	1	GC03M161173	1.30907	https://www.genecards.org/cgi-bin/carddisp.pl?gene=LOC105374186
HSALNG0018052-002		RNA Gene	1	GC02M113349	1.30907	https://www.genecards.org/cgi-bin/carddisp.pl?gene=HSALNG0018052-002
HSALNG0018052-001		RNA Gene	1	GC02M113348	1.30907	https://www.genecards.org/cgi-bin/carddisp.pl?gene=HSALNG0018052-001
lnc-CPNE8-5		RNA Gene	1	GC12M038427	1.30907	https://www.genecards.org/cgi-bin/carddisp.pl?gene=lnc-CPNE8-5
HSALNG0060213		RNA Gene	1	GC07P102796	1.30907	https://www.genecards.org/cgi-bin/carddisp.pl?gene=HSALNG0060213
piR-31534-654		RNA Gene	1	GC08P032065	1.30907	https://www.genecards.org/cgi-bin/carddisp.pl?gene=piR-31534-654
piR-42076-007		RNA Gene	1	GC12P038473	1.30907	https://www.genecards.org/cgi-bin/carddisp.pl?gene=piR-42076-007
piR-46002-536		RNA Gene	1	GC08M010938	1.30907	https://www.genecards.org/cgi-bin/carddisp.pl?gene=piR-46002-536
LOC100419686	Zinc Finger Protein 256 Pseudogene	Pseudogene	1	GC02P238454	1.30907	https://www.genecards.org/cgi-bin/carddisp.pl?gene=LOC100419686
IL18	Interleukin 18	Protein Coding	42	GC11M112143	1.30751	https://www.genecards.org/cgi-bin/carddisp.pl?gene=IL18
IL1A	Interleukin 1 Alpha	Protein Coding	42	GC02M112773	1.30751	https://www.genecards.org/cgi-bin/carddisp.pl?gene=IL1A
ETS1	ETS Proto-Oncogene 1, Transcription Factor	Protein Coding	47	GC11M128458	1.30275	https://www.genecards.org/cgi-bin/carddisp.pl?gene=ETS1
APC	APC Regulator Of WNT Signaling Pathway	Protein Coding	48	GC05P112707	1.30112	https://www.genecards.org/cgi-bin/carddisp.pl?gene=APC
TPT1	Tumor Protein, Translationally-Controlled 1	Protein Coding	45	GC13M045333	1.30075	https://www.genecards.org/cgi-bin/carddisp.pl?gene=TPT1
CCNB1	Cyclin B1	Protein Coding	45	GC05P069167	1.29437	https://www.genecards.org/cgi-bin/carddisp.pl?gene=CCNB1
LOC110740340	CYP2D6 Promoter	Biological Region	1	GC22P042612	1.29437	https://www.genecards.org/cgi-bin/carddisp.pl?gene=LOC110740340
AMH	Anti-Mullerian Hormone	Protein Coding	42	GC19P002260	1.29259	https://www.genecards.org/cgi-bin/carddisp.pl?gene=AMH
PLIN1	Perilipin 1	Protein Coding	44	GC15M089664	1.29258	https://www.genecards.org/cgi-bin/carddisp.pl?gene=PLIN1
GUSB	Glucuronidase Beta	Protein Coding	46	GC07M065960	1.28958	https://www.genecards.org/cgi-bin/carddisp.pl?gene=GUSB
EPHB2	EPH Receptor B2	Protein Coding	50	GC01P022710	1.28655	https://www.genecards.org/cgi-bin/carddisp.pl?gene=EPHB2
PSME1	Proteasome Activator Subunit 1	Protein Coding	41	GC14P024136	1.28655	https://www.genecards.org/cgi-bin/carddisp.pl?gene=PSME1
CHGB	Chromogranin B	Protein Coding	38	GC20P005911	1.285	https://www.genecards.org/cgi-bin/carddisp.pl?gene=CHGB
DICER1	Dicer 1, Ribonuclease III	Protein Coding	47	GC14M095086	1.28231	https://www.genecards.org/cgi-bin/carddisp.pl?gene=DICER1
KCNA2	Potassium Voltage-Gated Channel Subfamily A Member 2	Protein Coding	45	GC01M110519	1.27929	https://www.genecards.org/cgi-bin/carddisp.pl?gene=KCNA2
ADRA2C	Adrenoceptor Alpha 2C	Protein Coding	45	GC04P003766	1.27782	https://www.genecards.org/cgi-bin/carddisp.pl?gene=ADRA2C
CARM1	Coactivator Associated Arginine Methyltransferase 1	Protein Coding	46	GC19P010871	1.2776	https://www.genecards.org/cgi-bin/carddisp.pl?gene=CARM1
OPRM1	Opioid Receptor Mu 1	Protein Coding	48	GC06P154075	1.27662	https://www.genecards.org/cgi-bin/carddisp.pl?gene=OPRM1
OGG1	8-Oxoguanine DNA Glycosylase	Protein Coding	45	GC03P011218	1.26959	https://www.genecards.org/cgi-bin/carddisp.pl?gene=OGG1
CAMK1	Calcium/Calmodulin Dependent Protein Kinase I	Protein Coding	44	GC03M009774	1.26959	https://www.genecards.org/cgi-bin/carddisp.pl?gene=CAMK1
MIR219A1	MicroRNA 219a-1	RNA Gene	20	GC06P033207	1.26959	https://www.genecards.org/cgi-bin/carddisp.pl?gene=MIR219A1
GPI	Glucose-6-Phosphate Isomerase	Protein Coding	45	GC19P034359	1.26723	https://www.genecards.org/cgi-bin/carddisp.pl?gene=GPI
APRT	Adenine Phosphoribosyltransferase	Protein Coding	46	GC16M088810	1.26443	https://www.genecards.org/cgi-bin/carddisp.pl?gene=APRT
DST	Dystonin	Protein Coding	41	GC06M056457	1.26443	https://www.genecards.org/cgi-bin/carddisp.pl?gene=DST
ALDH5A1	Aldehyde Dehydrogenase 5 Family Member A1	Protein Coding	45	GC06P024494	1.26117	https://www.genecards.org/cgi-bin/carddisp.pl?gene=ALDH5A1
ITGB1	Integrin Subunit Beta 1	Protein Coding	49	GC10M032899	1.26075	https://www.genecards.org/cgi-bin/carddisp.pl?gene=ITGB1
SULT1A3	Sulfotransferase Family 1A Member 3	Protein Coding	37	GC16P030199	1.25883	https://www.genecards.org/cgi-bin/carddisp.pl?gene=SULT1A3
HELLS	Helicase, Lymphoid Specific	Protein Coding	45	GC10P094501	1.24912	https://www.genecards.org/cgi-bin/carddisp.pl?gene=HELLS
IL5	Interleukin 5	Protein Coding	43	GC05M132541	1.24912	https://www.genecards.org/cgi-bin/carddisp.pl?gene=IL5
DPP4	Dipeptidyl Peptidase 4	Protein Coding	48	GC02M161992	1.24668	https://www.genecards.org/cgi-bin/carddisp.pl?gene=DPP4
GRM8	Glutamate Metabotropic Receptor 8	Protein Coding	46	GC07M126438	1.24561	https://www.genecards.org/cgi-bin/carddisp.pl?gene=GRM8
TFEB	Transcription Factor EB	Protein Coding	41	GC06M051623	1.24504	https://www.genecards.org/cgi-bin/carddisp.pl?gene=TFEB
ADCY9	Adenylate Cyclase 9	Protein Coding	44	GC16M003953	1.24236	https://www.genecards.org/cgi-bin/carddisp.pl?gene=ADCY9
CEBPB	CCAAT Enhancer Binding Protein Beta	Protein Coding	43	GC20P050190	1.24236	https://www.genecards.org/cgi-bin/carddisp.pl?gene=CEBPB
GSTP1	Glutathione S-Transferase Pi 1	Protein Coding	49	GC11P067583	1.24193	https://www.genecards.org/cgi-bin/carddisp.pl?gene=GSTP1
FEN1	Flap Structure-Specific Endonuclease 1	Protein Coding	45	GC11P061793	1.24147	https://www.genecards.org/cgi-bin/carddisp.pl?gene=FEN1
DROSHA	Drosha Ribonuclease III	Protein Coding	42	GC05M031401	1.24147	https://www.genecards.org/cgi-bin/carddisp.pl?gene=DROSHA
COG2	Component Of Oligomeric Golgi Complex 2	Protein Coding	40	GC01P230642	1.24147	https://www.genecards.org/cgi-bin/carddisp.pl?gene=COG2
UBA1	Ubiquitin Like Modifier Activating Enzyme 1	Protein Coding	46	GC0XP047190	1.24078	https://www.genecards.org/cgi-bin/carddisp.pl?gene=UBA1
PSMD2	Proteasome 26S Subunit Ubiquitin Receptor, Non-ATPase 2	Protein Coding	43	GC03P184298	1.24078	https://www.genecards.org/cgi-bin/carddisp.pl?gene=PSMD2
CAND1	Cullin Associated And Neddylation Dissociated 1	Protein Coding	38	GC12P067270	1.24078	https://www.genecards.org/cgi-bin/carddisp.pl?gene=CAND1
PRKAR1B	Protein Kinase CAMP-Dependent Type I Regulatory Subunit Beta	Protein Coding	47	GC07M000549	1.2404	https://www.genecards.org/cgi-bin/carddisp.pl?gene=PRKAR1B
IFNAR1	Interferon Alpha And Beta Receptor Subunit 1	Protein Coding	44	GC21P033324	1.23908	https://www.genecards.org/cgi-bin/carddisp.pl?gene=IFNAR1
MIR92A1	MicroRNA 92a-1	RNA Gene	20	GC13P091484	1.23655	https://www.genecards.org/cgi-bin/carddisp.pl?gene=MIR92A1
VCP	Valosin Containing Protein	Protein Coding	48	GC09M035056	1.23415	https://www.genecards.org/cgi-bin/carddisp.pl?gene=VCP
MC4R	Melanocortin 4 Receptor	Protein Coding	45	GC18M060371	1.23312	https://www.genecards.org/cgi-bin/carddisp.pl?gene=MC4R
ALAS1	5'-Aminolevulinate Synthase 1	Protein Coding	44	GC03P052198	1.22941	https://www.genecards.org/cgi-bin/carddisp.pl?gene=ALAS1
IMMT	Inner Membrane Mitochondrial Protein	Protein Coding	39	GC02M086144	1.22941	https://www.genecards.org/cgi-bin/carddisp.pl?gene=IMMT
KNG1	Kininogen 1	Protein Coding	44	GC03P186717	1.22606	https://www.genecards.org/cgi-bin/carddisp.pl?gene=KNG1
SUMO1	Small Ubiquitin Like Modifier 1	Protein Coding	45	GC02M202206	1.21794	https://www.genecards.org/cgi-bin/carddisp.pl?gene=SUMO1
CCN2	Cellular Communication Network Factor 2	Protein Coding	38	GC06M131948	1.21384	https://www.genecards.org/cgi-bin/carddisp.pl?gene=CCN2
RPA2	Replication Protein A2	Protein Coding	44	GC01M027902	1.21173	https://www.genecards.org/cgi-bin/carddisp.pl?gene=RPA2
AQP2	Aquaporin 2	Protein Coding	46	GC12P049950	1.20913	https://www.genecards.org/cgi-bin/carddisp.pl?gene=AQP2
TDO2	Tryptophan 2,3-Dioxygenase	Protein Coding	44	GC04P155854	1.20814	https://www.genecards.org/cgi-bin/carddisp.pl?gene=TDO2
COL2A1	Collagen Type II Alpha 1 Chain	Protein Coding	48	GC12M047972	1.20811	https://www.genecards.org/cgi-bin/carddisp.pl?gene=COL2A1
BRCA2	BRCA2 DNA Repair Associated	Protein Coding	48	GC13P032315	1.20731	https://www.genecards.org/cgi-bin/carddisp.pl?gene=BRCA2
NMNAT1	Nicotinamide Nucleotide Adenylyltransferase 1	Protein Coding	47	GC01P009944	1.20731	https://www.genecards.org/cgi-bin/carddisp.pl?gene=NMNAT1
BLNK	B Cell Linker	Protein Coding	46	GC10M096219	1.20731	https://www.genecards.org/cgi-bin/carddisp.pl?gene=BLNK
INPP5D	Inositol Polyphosphate-5-Phosphatase D	Protein Coding	45	GC02P233059	1.20731	https://www.genecards.org/cgi-bin/carddisp.pl?gene=INPP5D
SFN	Stratifin	Protein Coding	45	GC01P026976	1.20731	https://www.genecards.org/cgi-bin/carddisp.pl?gene=SFN
GMNN	Geminin DNA Replication Inhibitor	Protein Coding	44	GC06P024779	1.20731	https://www.genecards.org/cgi-bin/carddisp.pl?gene=GMNN
PIAS1	Protein Inhibitor Of Activated STAT 1	Protein Coding	44	GC15P068054	1.20731	https://www.genecards.org/cgi-bin/carddisp.pl?gene=PIAS1
BTC	Betacellulin	Protein Coding	43	GC04M074744	1.20731	https://www.genecards.org/cgi-bin/carddisp.pl?gene=BTC
BEST1	Bestrophin 1	Protein Coding	42	GC11P061949	1.20731	https://www.genecards.org/cgi-bin/carddisp.pl?gene=BEST1
CLCN6	Chloride Voltage-Gated Channel 6	Protein Coding	42	GC01P011806	1.20731	https://www.genecards.org/cgi-bin/carddisp.pl?gene=CLCN6
IRF4	Interferon Regulatory Factor 4	Protein Coding	42	GC06P000391	1.20731	https://www.genecards.org/cgi-bin/carddisp.pl?gene=IRF4
PDE1B	Phosphodiesterase 1B	Protein Coding	42	GC12P054549	1.20731	https://www.genecards.org/cgi-bin/carddisp.pl?gene=PDE1B
PEA15	Proliferation And Apoptosis Adaptor Protein 15	Protein Coding	42	GC01P160205	1.20731	https://www.genecards.org/cgi-bin/carddisp.pl?gene=PEA15
LOXL3	Lysyl Oxidase Like 3	Protein Coding	41	GC02M074532	1.20731	https://www.genecards.org/cgi-bin/carddisp.pl?gene=LOXL3
TREM2	Triggering Receptor Expressed On Myeloid Cells 2	Protein Coding	41	GC06M051609	1.20731	https://www.genecards.org/cgi-bin/carddisp.pl?gene=TREM2
STX4	Syntaxin 4	Protein Coding	41	GC16P034564	1.20731	https://www.genecards.org/cgi-bin/carddisp.pl?gene=STX4
SLC8A2	Solute Carrier Family 8 Member A2	Protein Coding	40	GC19M047428	1.20731	https://www.genecards.org/cgi-bin/carddisp.pl?gene=SLC8A2
DOK5	Docking Protein 5	Protein Coding	39	GC20P054476	1.20731	https://www.genecards.org/cgi-bin/carddisp.pl?gene=DOK5
BRWD1	Bromodomain And WD Repeat Domain Containing 1	Protein Coding	38	GC21M039184	1.20731	https://www.genecards.org/cgi-bin/carddisp.pl?gene=BRWD1
DMAP1	DNA Methyltransferase 1 Associated Protein 1	Protein Coding	38	GC01P044214	1.20731	https://www.genecards.org/cgi-bin/carddisp.pl?gene=DMAP1
SYCP2	Synaptonemal Complex Protein 2	Protein Coding	38	GC20M059863	1.20731	https://www.genecards.org/cgi-bin/carddisp.pl?gene=SYCP2
SCAMP2	Secretory Carrier Membrane Protein 2	Protein Coding	38	GC15M074843	1.20731	https://www.genecards.org/cgi-bin/carddisp.pl?gene=SCAMP2
FOXL1	Forkhead Box L1	Protein Coding	37	GC16P086576	1.20731	https://www.genecards.org/cgi-bin/carddisp.pl?gene=FOXL1
SLC39A12	Solute Carrier Family 39 Member 12	Protein Coding	37	GC10P017951	1.20731	https://www.genecards.org/cgi-bin/carddisp.pl?gene=SLC39A12
DUSP8	Dual Specificity Phosphatase 8	Protein Coding	36	GC11M001666	1.20731	https://www.genecards.org/cgi-bin/carddisp.pl?gene=DUSP8
KCNV1	Potassium Voltage-Gated Channel Modifier Subfamily V Member 1	Protein Coding	36	GC08M109963	1.20731	https://www.genecards.org/cgi-bin/carddisp.pl?gene=KCNV1
ZNF75D	Zinc Finger Protein 75D	Protein Coding	35	GC0XM135248	1.20731	https://www.genecards.org/cgi-bin/carddisp.pl?gene=ZNF75D
ADGRB3	Adhesion G Protein-Coupled Receptor B3	Protein Coding	34	GC06P068635	1.20731	https://www.genecards.org/cgi-bin/carddisp.pl?gene=ADGRB3
FKBP11	FKBP Prolyl Isomerase 11	Protein Coding	34	GC12M049155	1.20731	https://www.genecards.org/cgi-bin/carddisp.pl?gene=FKBP11
RNPC3	RNA Binding Region (RNP1, RRM) Containing 3	Protein Coding	34	GC01P103525	1.20731	https://www.genecards.org/cgi-bin/carddisp.pl?gene=RNPC3
DENND2D	DENN Domain Containing 2D	Protein Coding	33	GC01M111185	1.20731	https://www.genecards.org/cgi-bin/carddisp.pl?gene=DENND2D
H1-5	H1.5 Linker Histone, Cluster Member	Protein Coding	33	GC06M051788	1.20731	https://www.genecards.org/cgi-bin/carddisp.pl?gene=H1-5
OR2W1	Olfactory Receptor Family 2 Subfamily W Member 1	Protein Coding	33	GC06M051214	1.20731	https://www.genecards.org/cgi-bin/carddisp.pl?gene=OR2W1
RNF103	Ring Finger Protein 103	Protein Coding	33	GC02M086603	1.20731	https://www.genecards.org/cgi-bin/carddisp.pl?gene=RNF103
URGCP	Upregulator Of Cell Proliferation	Protein Coding	33	GC07M043876	1.20731	https://www.genecards.org/cgi-bin/carddisp.pl?gene=URGCP
MAP7D1	MAP7 Domain Containing 1	Protein Coding	32	GC01P036155	1.20731	https://www.genecards.org/cgi-bin/carddisp.pl?gene=MAP7D1
KMT5B	Lysine Methyltransferase 5B	Protein Coding	32	GC11M074686	1.20731	https://www.genecards.org/cgi-bin/carddisp.pl?gene=KMT5B
TCTA	T Cell Leukemia Translocation Altered	Protein Coding	32	GC03P049412	1.20731	https://www.genecards.org/cgi-bin/carddisp.pl?gene=TCTA
MTREX	Mtr4 Exosome RNA Helicase	Protein Coding	30	GC05P055308	1.20731	https://www.genecards.org/cgi-bin/carddisp.pl?gene=MTREX
ZNF211	Zinc Finger Protein 211	Protein Coding	30	GC19P057630	1.20731	https://www.genecards.org/cgi-bin/carddisp.pl?gene=ZNF211
CFAP65	Cilia And Flagella Associated Protein 65	Protein Coding	29	GC02M219003	1.20731	https://www.genecards.org/cgi-bin/carddisp.pl?gene=CFAP65
GLMP	Glycosylated Lysosomal Membrane Protein	Protein Coding	28	GC01M156290	1.20731	https://www.genecards.org/cgi-bin/carddisp.pl?gene=GLMP
PRR14L	Proline Rich 14 Like	Protein Coding	27	GC22M031676	1.20731	https://www.genecards.org/cgi-bin/carddisp.pl?gene=PRR14L
PRODH	Proline Dehydrogenase 1	Protein Coding	45	GC22M018912	1.20689	https://www.genecards.org/cgi-bin/carddisp.pl?gene=PRODH
SRD5A1	Steroid 5 Alpha-Reductase 1	Protein Coding	44	GC05P006633	1.19804	https://www.genecards.org/cgi-bin/carddisp.pl?gene=SRD5A1
RAN	RAN, Member RAS Oncogene Family	Protein Coding	44	GC12P130871	1.19605	https://www.genecards.org/cgi-bin/carddisp.pl?gene=RAN
KDM2B	Lysine Demethylase 2B	Protein Coding	41	GC12M121402	1.19605	https://www.genecards.org/cgi-bin/carddisp.pl?gene=KDM2B
FBXO22	F-Box Protein 22	Protein Coding	34	GC15P075903	1.19605	https://www.genecards.org/cgi-bin/carddisp.pl?gene=FBXO22
FBXO9	F-Box Protein 9	Protein Coding	34	GC06P061477	1.19605	https://www.genecards.org/cgi-bin/carddisp.pl?gene=FBXO9
ATF7	Activating Transcription Factor 7	Protein Coding	40	GC12M053527	1.19326	https://www.genecards.org/cgi-bin/carddisp.pl?gene=ATF7
HSF1	Heat Shock Transcription Factor 1	Protein Coding	44	GC08P144291	1.18933	https://www.genecards.org/cgi-bin/carddisp.pl?gene=HSF1
COPS8	COP9 Signalosome Subunit 8	Protein Coding	36	GC02P237085	1.18933	https://www.genecards.org/cgi-bin/carddisp.pl?gene=COPS8
ECE1	Endothelin Converting Enzyme 1	Protein Coding	47	GC01M021217	1.18829	https://www.genecards.org/cgi-bin/carddisp.pl?gene=ECE1
SDHD	Succinate Dehydrogenase Complex Subunit D	Protein Coding	44	GC11P112087	1.18829	https://www.genecards.org/cgi-bin/carddisp.pl?gene=SDHD
BAZ1B	Bromodomain Adjacent To Zinc Finger Domain 1B	Protein Coding	40	GC07M073440	1.18829	https://www.genecards.org/cgi-bin/carddisp.pl?gene=BAZ1B
CSNK1G2	Casein Kinase 1 Gamma 2	Protein Coding	45	GC19P001941	1.18422	https://www.genecards.org/cgi-bin/carddisp.pl?gene=CSNK1G2
ITGB3	Integrin Subunit Beta 3	Protein Coding	49	GC17P047261	1.18255	https://www.genecards.org/cgi-bin/carddisp.pl?gene=ITGB3
LHCGR	Luteinizing Hormone/Choriogonadotropin Receptor	Protein Coding	46	GC02M048686	1.17798	https://www.genecards.org/cgi-bin/carddisp.pl?gene=LHCGR
PSMC3	Proteasome 26S Subunit, ATPase 3	Protein Coding	42	GC11M073862	1.17667	https://www.genecards.org/cgi-bin/carddisp.pl?gene=PSMC3
PSMD3	Proteasome 26S Subunit, Non-ATPase 3	Protein Coding	42	GC17P039980	1.17667	https://www.genecards.org/cgi-bin/carddisp.pl?gene=PSMD3
PSMC5	Proteasome 26S Subunit, ATPase 5	Protein Coding	42	GC17P063827	1.17667	https://www.genecards.org/cgi-bin/carddisp.pl?gene=PSMC5
PSMD11	Proteasome 26S Subunit, Non-ATPase 11	Protein Coding	41	GC17P032444	1.17667	https://www.genecards.org/cgi-bin/carddisp.pl?gene=PSMD11
PSMC6	Proteasome 26S Subunit, ATPase 6	Protein Coding	40	GC14P052707	1.17667	https://www.genecards.org/cgi-bin/carddisp.pl?gene=PSMC6
PSMD1	Proteasome 26S Subunit, Non-ATPase 1	Protein Coding	39	GC02P231056	1.17667	https://www.genecards.org/cgi-bin/carddisp.pl?gene=PSMD1
ARNT2	Aryl Hydrocarbon Receptor Nuclear Translocator 2	Protein Coding	43	GC15P080404	1.17518	https://www.genecards.org/cgi-bin/carddisp.pl?gene=ARNT2
TRAF2	TNF Receptor Associated Factor 2	Protein Coding	44	GC09P136881	1.173	https://www.genecards.org/cgi-bin/carddisp.pl?gene=TRAF2
AMY1A	Amylase Alpha 1A	Protein Coding	34	GC01P103651	1.16861	https://www.genecards.org/cgi-bin/carddisp.pl?gene=AMY1A
XBP1	X-Box Binding Protein 1	Protein Coding	45	GC22M028794	1.16858	https://www.genecards.org/cgi-bin/carddisp.pl?gene=XBP1
ORMDL3	ORMDL Sphingolipid Biosynthesis Regulator 3	Protein Coding	39	GC17M039921	1.16633	https://www.genecards.org/cgi-bin/carddisp.pl?gene=ORMDL3
PDGFB	Platelet Derived Growth Factor Subunit B	Protein Coding	48	GC22M051474	1.16463	https://www.genecards.org/cgi-bin/carddisp.pl?gene=PDGFB
RPS6KB1	Ribosomal Protein S6 Kinase B1	Protein Coding	48	GC17P059893	1.16463	https://www.genecards.org/cgi-bin/carddisp.pl?gene=RPS6KB1
CTSH	Cathepsin H	Protein Coding	46	GC15M078925	1.16463	https://www.genecards.org/cgi-bin/carddisp.pl?gene=CTSH
CTSL	Cathepsin L	Protein Coding	45	GC09P087725	1.16463	https://www.genecards.org/cgi-bin/carddisp.pl?gene=CTSL
BLZF1	Basic Leucine Zipper Nuclear Factor 1	Protein Coding	38	GC01P169367	1.16463	https://www.genecards.org/cgi-bin/carddisp.pl?gene=BLZF1
PFAS	Phosphoribosylformylglycinamidine Synthase	Protein Coding	42	GC17P008247	1.16455	https://www.genecards.org/cgi-bin/carddisp.pl?gene=PFAS
CIRBP	Cold Inducible RNA Binding Protein	Protein Coding	37	GC19P001259	1.16455	https://www.genecards.org/cgi-bin/carddisp.pl?gene=CIRBP
INSL6	Insulin Like 6	Protein Coding	34	GC09M004991	1.16455	https://www.genecards.org/cgi-bin/carddisp.pl?gene=INSL6
DIRAS3	DIRAS Family GTPase 3	Protein Coding	31	GC01M068045	1.16455	https://www.genecards.org/cgi-bin/carddisp.pl?gene=DIRAS3
PURA	Purine Rich Element Binding Protein A	Protein Coding	43	GC05P140076	1.16233	https://www.genecards.org/cgi-bin/carddisp.pl?gene=PURA
MAT2A	Methionine Adenosyltransferase 2A	Protein Coding	46	GC02P085551	1.16212	https://www.genecards.org/cgi-bin/carddisp.pl?gene=MAT2A
PENK	Proenkephalin	Protein Coding	37	GC08M056436	1.16147	https://www.genecards.org/cgi-bin/carddisp.pl?gene=PENK
MIR29A	MicroRNA 29a	RNA Gene	22	GC07M130876	1.16058	https://www.genecards.org/cgi-bin/carddisp.pl?gene=MIR29A
MIR29B2	MicroRNA 29b-2	RNA Gene	18	GC01M207806	1.16058	https://www.genecards.org/cgi-bin/carddisp.pl?gene=MIR29B2
MIR29C	MicroRNA 29c	RNA Gene	18	GC01M207802	1.16058	https://www.genecards.org/cgi-bin/carddisp.pl?gene=MIR29C
INSR	Insulin Receptor	Protein Coding	52	GC19M007112	1.15978	https://www.genecards.org/cgi-bin/carddisp.pl?gene=INSR
MFSD2A	Major Facilitator Superfamily Domain Containing 2A	Protein Coding	38	GC01P039955	1.15623	https://www.genecards.org/cgi-bin/carddisp.pl?gene=MFSD2A
NDUFS3	NADH:Ubiquinone Oxidoreductase Core Subunit S3	Protein Coding	46	GC11P047567	1.15412	https://www.genecards.org/cgi-bin/carddisp.pl?gene=NDUFS3
RANBP2	RAN Binding Protein 2	Protein Coding	45	GC02P108719	1.15412	https://www.genecards.org/cgi-bin/carddisp.pl?gene=RANBP2
LRPPRC	Leucine Rich Pentatricopeptide Repeat Containing	Protein Coding	42	GC02M043850	1.15412	https://www.genecards.org/cgi-bin/carddisp.pl?gene=LRPPRC
ATP5F1A	ATP Synthase F1 Subunit Alpha	Protein Coding	37	GC18M046081	1.15412	https://www.genecards.org/cgi-bin/carddisp.pl?gene=ATP5F1A
KCNJ14	Potassium Inwardly Rectifying Channel Subfamily J Member 14	Protein Coding	38	GC19P048455	1.14926	https://www.genecards.org/cgi-bin/carddisp.pl?gene=KCNJ14
CALR	Calreticulin	Protein Coding	49	GC19P012938	1.14464	https://www.genecards.org/cgi-bin/carddisp.pl?gene=CALR
TIMP1	TIMP Metallopeptidase Inhibitor 1	Protein Coding	43	GC0XP047583	1.13907	https://www.genecards.org/cgi-bin/carddisp.pl?gene=TIMP1
ITGAV	Integrin Subunit Alpha V	Protein Coding	46	GC02P186589	1.13667	https://www.genecards.org/cgi-bin/carddisp.pl?gene=ITGAV
KCNH4	Potassium Voltage-Gated Channel Subfamily H Member 4	Protein Coding	37	GC17M042160	1.13643	https://www.genecards.org/cgi-bin/carddisp.pl?gene=KCNH4
GNAI1	G Protein Subunit Alpha I1	Protein Coding	46	GC07P079769	1.13171	https://www.genecards.org/cgi-bin/carddisp.pl?gene=GNAI1
NTRK2	Neurotrophic Receptor Tyrosine Kinase 2	Protein Coding	52	GC09P084668	1.13102	https://www.genecards.org/cgi-bin/carddisp.pl?gene=NTRK2
ATG7	Autophagy Related 7	Protein Coding	42	GC03P011282	1.13102	https://www.genecards.org/cgi-bin/carddisp.pl?gene=ATG7
ENSG00000259164	Novel Protein	Protein Coding	7	GC14P077098	1.13102	https://www.genecards.org/cgi-bin/carddisp.pl?gene=ENSG00000259164
ENSG00000272297	Novel Protein	Protein Coding	5	GC04M186426	1.13102	https://www.genecards.org/cgi-bin/carddisp.pl?gene=ENSG00000272297
MAP2K7	Mitogen-Activated Protein Kinase Kinase 7	Protein Coding	45	GC19P007903	1.12949	https://www.genecards.org/cgi-bin/carddisp.pl?gene=MAP2K7
YY1	YY1 Transcription Factor	Protein Coding	46	GC14P100238	1.12673	https://www.genecards.org/cgi-bin/carddisp.pl?gene=YY1
MADD	MAP Kinase Activating Death Domain	Protein Coding	42	GC11P047290	1.12673	https://www.genecards.org/cgi-bin/carddisp.pl?gene=MADD
SLC9A6	Solute Carrier Family 9 Member A6	Protein Coding	46	GC0XP135985	1.12466	https://www.genecards.org/cgi-bin/carddisp.pl?gene=SLC9A6
TFAP2B	Transcription Factor AP-2 Beta	Protein Coding	44	GC06P061433	1.12466	https://www.genecards.org/cgi-bin/carddisp.pl?gene=TFAP2B
HAPLN1	Hyaluronan And Proteoglycan Link Protein 1	Protein Coding	41	GC05M083637	1.12466	https://www.genecards.org/cgi-bin/carddisp.pl?gene=HAPLN1
NOX4	NADPH Oxidase 4	Protein Coding	41	GC11M089324	1.12346	https://www.genecards.org/cgi-bin/carddisp.pl?gene=NOX4
PLA2G7	Phospholipase A2 Group VII	Protein Coding	48	GC06M051706	1.1211	https://www.genecards.org/cgi-bin/carddisp.pl?gene=PLA2G7
ADRA1A	Adrenoceptor Alpha 1A	Protein Coding	46	GC08M026747	1.12077	https://www.genecards.org/cgi-bin/carddisp.pl?gene=ADRA1A
LIPE	Lipase E, Hormone Sensitive Type	Protein Coding	46	GC19M042401	1.1187	https://www.genecards.org/cgi-bin/carddisp.pl?gene=LIPE
ESRRB	Estrogen Related Receptor Beta	Protein Coding	49	GC14P076310	1.11425	https://www.genecards.org/cgi-bin/carddisp.pl?gene=ESRRB
PARP1	Poly(ADP-Ribose) Polymerase 1	Protein Coding	48	GC01M226360	1.11051	https://www.genecards.org/cgi-bin/carddisp.pl?gene=PARP1
PRKN	Parkin RBR E3 Ubiquitin Protein Ligase	Protein Coding	38	GC06M161348	1.10855	https://www.genecards.org/cgi-bin/carddisp.pl?gene=PRKN
PRSS8	Serine Protease 8	Protein Coding	43	GC16M032442	1.10307	https://www.genecards.org/cgi-bin/carddisp.pl?gene=PRSS8
CELF2	CUGBP Elav-Like Family Member 2	Protein Coding	41	GC10P010462	1.10307	https://www.genecards.org/cgi-bin/carddisp.pl?gene=CELF2
CCL4	C-C Motif Chemokine Ligand 4	Protein Coding	39	GC17P036103	1.10307	https://www.genecards.org/cgi-bin/carddisp.pl?gene=CCL4
CCL13	C-C Motif Chemokine Ligand 13	Protein Coding	37	GC17P034356	1.10307	https://www.genecards.org/cgi-bin/carddisp.pl?gene=CCL13
CCL17	C-C Motif Chemokine Ligand 17	Protein Coding	37	GC16P057407	1.10307	https://www.genecards.org/cgi-bin/carddisp.pl?gene=CCL17
ATM	ATM Serine/Threonine Kinase	Protein Coding	52	GC11P108222	1.10137	https://www.genecards.org/cgi-bin/carddisp.pl?gene=ATM
BRF1	BRF1 RNA Polymerase III Transcription Initiation Factor Subunit	Protein Coding	40	GC14M110868	1.10015	https://www.genecards.org/cgi-bin/carddisp.pl?gene=BRF1
CAMK2A	Calcium/Calmodulin Dependent Protein Kinase II Alpha	Protein Coding	49	GC05M150219	1.08827	https://www.genecards.org/cgi-bin/carddisp.pl?gene=CAMK2A
ITPR1	Inositol 1,4,5-Trisphosphate Receptor Type 1	Protein Coding	48	GC03P004486	1.08827	https://www.genecards.org/cgi-bin/carddisp.pl?gene=ITPR1
ADCY3	Adenylate Cyclase 3	Protein Coding	46	GC02M024819	1.0882	https://www.genecards.org/cgi-bin/carddisp.pl?gene=ADCY3
ITPR3	Inositol 1,4,5-Trisphosphate Receptor Type 3	Protein Coding	45	GC06P033620	1.0882	https://www.genecards.org/cgi-bin/carddisp.pl?gene=ITPR3
SF3A3	Splicing Factor 3a Subunit 3	Protein Coding	37	GC01M037956	1.0882	https://www.genecards.org/cgi-bin/carddisp.pl?gene=SF3A3
IDH1	Isocitrate Dehydrogenase (NADP(+)) 1	Protein Coding	51	GC02M208236	1.08743	https://www.genecards.org/cgi-bin/carddisp.pl?gene=IDH1
PEBP1	Phosphatidylethanolamine Binding Protein 1	Protein Coding	44	GC12P118135	1.08528	https://www.genecards.org/cgi-bin/carddisp.pl?gene=PEBP1
RGS20	Regulator Of G Protein Signaling 20	Protein Coding	38	GC08P053851	1.08369	https://www.genecards.org/cgi-bin/carddisp.pl?gene=RGS20
EIF4G1	Eukaryotic Translation Initiation Factor 4 Gamma 1	Protein Coding	45	GC03P184314	1.07965	https://www.genecards.org/cgi-bin/carddisp.pl?gene=EIF4G1
SYP	Synaptophysin	Protein Coding	43	GC0XM049187	1.07923	https://www.genecards.org/cgi-bin/carddisp.pl?gene=SYP
ITLN1	Intelectin 1	Protein Coding	37	GC01M160876	1.07759	https://www.genecards.org/cgi-bin/carddisp.pl?gene=ITLN1
TSHB	Thyroid Stimulating Hormone Subunit Beta	Protein Coding	41	GC01P115029	1.07294	https://www.genecards.org/cgi-bin/carddisp.pl?gene=TSHB
NFE2	Nuclear Factor, Erythroid 2	Protein Coding	40	GC12M054292	1.07294	https://www.genecards.org/cgi-bin/carddisp.pl?gene=NFE2
RCVRN	Recoverin	Protein Coding	38	GC17M009896	1.07294	https://www.genecards.org/cgi-bin/carddisp.pl?gene=RCVRN
ZNF423	Zinc Finger Protein 423	Protein Coding	39	GC16M049487	1.07203	https://www.genecards.org/cgi-bin/carddisp.pl?gene=ZNF423
KIF5A	Kinesin Family Member 5A	Protein Coding	44	GC12P057549	1.06923	https://www.genecards.org/cgi-bin/carddisp.pl?gene=KIF5A
MIR16-1	MicroRNA 16-1	RNA Gene	22	GC13M050048	1.06707	https://www.genecards.org/cgi-bin/carddisp.pl?gene=MIR16-1
DOK7	Docking Protein 7	Protein Coding	39	GC04P003465	1.06706	https://www.genecards.org/cgi-bin/carddisp.pl?gene=DOK7
PANK2	Pantothenate Kinase 2	Protein Coding	44	GC20P003887	1.06488	https://www.genecards.org/cgi-bin/carddisp.pl?gene=PANK2
CCDC87	Coiled-Coil Domain Containing 87	Protein Coding	29	GC11M066590	1.06488	https://www.genecards.org/cgi-bin/carddisp.pl?gene=CCDC87
PRDX2	Peroxiredoxin 2	Protein Coding	45	GC19M012796	1.06129	https://www.genecards.org/cgi-bin/carddisp.pl?gene=PRDX2
CREB3L3	CAMP Responsive Element Binding Protein 3 Like 3	Protein Coding	38	GC19P004153	1.06029	https://www.genecards.org/cgi-bin/carddisp.pl?gene=CREB3L3
EIF4EBP1	Eukaryotic Translation Initiation Factor 4E Binding Protein 1	Protein Coding	45	GC08P038108	1.05959	https://www.genecards.org/cgi-bin/carddisp.pl?gene=EIF4EBP1
USF1	Upstream Transcription Factor 1	Protein Coding	42	GC01M161039	1.05959	https://www.genecards.org/cgi-bin/carddisp.pl?gene=USF1
KAT8	Lysine Acetyltransferase 8	Protein Coding	41	GC16P034574	1.05959	https://www.genecards.org/cgi-bin/carddisp.pl?gene=KAT8
SLC16A1	Solute Carrier Family 16 Member 1	Protein Coding	48	GC01M112937	1.05189	https://www.genecards.org/cgi-bin/carddisp.pl?gene=SLC16A1
YWHAB	Tyrosine 3-Monooxygenase/Tryptophan 5-Monooxygenase Activation Protein Beta	Protein Coding	47	GC20P044885	1.05189	https://www.genecards.org/cgi-bin/carddisp.pl?gene=YWHAB
FOXP3	Forkhead Box P3	Protein Coding	46	GC0XM049250	1.04761	https://www.genecards.org/cgi-bin/carddisp.pl?gene=FOXP3
GHSR	Growth Hormone Secretagogue Receptor	Protein Coding	47	GC03M172443	1.04601	https://www.genecards.org/cgi-bin/carddisp.pl?gene=GHSR
CCKBR	Cholecystokinin B Receptor	Protein Coding	44	GC11P006259	1.04598	https://www.genecards.org/cgi-bin/carddisp.pl?gene=CCKBR
HES1	Hes Family BHLH Transcription Factor 1	Protein Coding	42	GC03P194136	1.0444	https://www.genecards.org/cgi-bin/carddisp.pl?gene=HES1
TRIP12	Thyroid Hormone Receptor Interactor 12	Protein Coding	42	GC02M229763	1.03204	https://www.genecards.org/cgi-bin/carddisp.pl?gene=TRIP12
CASP8	Caspase 8	Protein Coding	51	GC02P201233	1.03171	https://www.genecards.org/cgi-bin/carddisp.pl?gene=CASP8
SLC1A2	Solute Carrier Family 1 Member 2	Protein Coding	49	GC11M035252	1.02692	https://www.genecards.org/cgi-bin/carddisp.pl?gene=SLC1A2
ENG	Endoglin	Protein Coding	45	GC09M127815	1.02543	https://www.genecards.org/cgi-bin/carddisp.pl?gene=ENG
ADRA2B	Adrenoceptor Alpha 2B	Protein Coding	45	GC02M096112	1.02312	https://www.genecards.org/cgi-bin/carddisp.pl?gene=ADRA2B
ANXA1	Annexin A1	Protein Coding	48	GC09P073151	1.02014	https://www.genecards.org/cgi-bin/carddisp.pl?gene=ANXA1
COL1A1	Collagen Type I Alpha 1 Chain	Protein Coding	49	GC17M050183	1.01968	https://www.genecards.org/cgi-bin/carddisp.pl?gene=COL1A1
SCP2	Sterol Carrier Protein 2	Protein Coding	46	GC01P052927	1.01965	https://www.genecards.org/cgi-bin/carddisp.pl?gene=SCP2
NR1I2	Nuclear Receptor Subfamily 1 Group I Member 2	Protein Coding	45	GC03P119780	1.0108	https://www.genecards.org/cgi-bin/carddisp.pl?gene=NR1I2
PI4KA	Phosphatidylinositol 4-Kinase Alpha	Protein Coding	47	GC22M020707	1.00914	https://www.genecards.org/cgi-bin/carddisp.pl?gene=PI4KA
BTK	Bruton Tyrosine Kinase	Protein Coding	52	GC0XM101349	1.00899	https://www.genecards.org/cgi-bin/carddisp.pl?gene=BTK
TUBB	Tubulin Beta Class I	Protein Coding	49	GC06P061150	1.00839	https://www.genecards.org/cgi-bin/carddisp.pl?gene=TUBB
PRMT1	Protein Arginine Methyltransferase 1	Protein Coding	46	GC19P049675	1.00839	https://www.genecards.org/cgi-bin/carddisp.pl?gene=PRMT1
YWHAQ	Tyrosine 3-Monooxygenase/Tryptophan 5-Monooxygenase Activation Protein Theta	Protein Coding	46	GC02M009583	1.00839	https://www.genecards.org/cgi-bin/carddisp.pl?gene=YWHAQ
DYNC1H1	Dynein Cytoplasmic 1 Heavy Chain 1	Protein Coding	44	GC14P106997	1.00839	https://www.genecards.org/cgi-bin/carddisp.pl?gene=DYNC1H1
SNRNP200	Small Nuclear Ribonucleoprotein U5 Subunit 200	Protein Coding	41	GC02M096686	1.00839	https://www.genecards.org/cgi-bin/carddisp.pl?gene=SNRNP200
PSMC2	Proteasome 26S Subunit, ATPase 2	Protein Coding	40	GC07P103344	1.00839	https://www.genecards.org/cgi-bin/carddisp.pl?gene=PSMC2
HNRNPH1	Heterogeneous Nuclear Ribonucleoprotein H1	Protein Coding	38	GC05M179614	1.00839	https://www.genecards.org/cgi-bin/carddisp.pl?gene=HNRNPH1
NASP	Nuclear Autoantigenic Sperm Protein	Protein Coding	36	GC01P045583	1.00839	https://www.genecards.org/cgi-bin/carddisp.pl?gene=NASP
PDPK1	3-Phosphoinositide Dependent Protein Kinase 1	Protein Coding	48	GC16P002537	1.00554	https://www.genecards.org/cgi-bin/carddisp.pl?gene=PDPK1
CGB5	Chorionic Gonadotropin Subunit Beta 5	Protein Coding	31	GC19P049043	1.0025	https://www.genecards.org/cgi-bin/carddisp.pl?gene=CGB5
SNRPN	Small Nuclear Ribonucleoprotein Polypeptide N	Protein Coding	44	GC15P024823	0.995338	https://www.genecards.org/cgi-bin/carddisp.pl?gene=SNRPN
CDKL5	Cyclin Dependent Kinase Like 5	Protein Coding	42	GC0XP018425	0.995338	https://www.genecards.org/cgi-bin/carddisp.pl?gene=CDKL5
ADRA2A	Adrenoceptor Alpha 2A	Protein Coding	46	GC10P111077	0.986815	https://www.genecards.org/cgi-bin/carddisp.pl?gene=ADRA2A
CREB3L1	CAMP Responsive Element Binding Protein 3 Like 1	Protein Coding	41	GC11P046299	0.983448	https://www.genecards.org/cgi-bin/carddisp.pl?gene=CREB3L1
CACNA1I	Calcium Voltage-Gated Channel Subunit Alpha1 I	Protein Coding	43	GC22P039570	0.983236	https://www.genecards.org/cgi-bin/carddisp.pl?gene=CACNA1I
KCNH7	Potassium Voltage-Gated Channel Subfamily H Member 7	Protein Coding	42	GC02M162371	0.983236	https://www.genecards.org/cgi-bin/carddisp.pl?gene=KCNH7
DIO2	Iodothyronine Deiodinase 2	Protein Coding	40	GC14M080197	0.977444	https://www.genecards.org/cgi-bin/carddisp.pl?gene=DIO2
ABCC2	ATP Binding Cassette Subfamily C Member 2	Protein Coding	47	GC10P099782	0.975026	https://www.genecards.org/cgi-bin/carddisp.pl?gene=ABCC2
ATP1A3	ATPase Na+/K+ Transporting Subunit Alpha 3	Protein Coding	47	GC19M041966	0.975026	https://www.genecards.org/cgi-bin/carddisp.pl?gene=ATP1A3
YWHAH	Tyrosine 3-Monooxygenase/Tryptophan 5-Monooxygenase Activation Protein Eta	Protein Coding	46	GC22P031944	0.975026	https://www.genecards.org/cgi-bin/carddisp.pl?gene=YWHAH
HNMT	Histamine N-Methyltransferase	Protein Coding	44	GC02P137964	0.974302	https://www.genecards.org/cgi-bin/carddisp.pl?gene=HNMT
ATXN3	Ataxin 3	Protein Coding	44	GC14M097082	0.973815	https://www.genecards.org/cgi-bin/carddisp.pl?gene=ATXN3
MOG	Myelin Oligodendrocyte Glycoprotein	Protein Coding	44	GC06P061113	0.973815	https://www.genecards.org/cgi-bin/carddisp.pl?gene=MOG
PDYN	Prodynorphin	Protein Coding	43	GC20M001978	0.973815	https://www.genecards.org/cgi-bin/carddisp.pl?gene=PDYN
HLA-DQB1	Major Histocompatibility Complex, Class II, DQ Beta 1	Protein Coding	42	GC06M051466	0.973815	https://www.genecards.org/cgi-bin/carddisp.pl?gene=HLA-DQB1
TRIB2	Tribbles Pseudokinase 2	Protein Coding	37	GC02P012717	0.973815	https://www.genecards.org/cgi-bin/carddisp.pl?gene=TRIB2
ASXL3	ASXL Transcriptional Regulator 3	Protein Coding	33	GC18P033578	0.973815	https://www.genecards.org/cgi-bin/carddisp.pl?gene=ASXL3
IGLON5	IgLON Family Member 5	Protein Coding	32	GC19P051311	0.973815	https://www.genecards.org/cgi-bin/carddisp.pl?gene=IGLON5
MMP8	Matrix Metallopeptidase 8	Protein Coding	47	GC11M102617	0.972554	https://www.genecards.org/cgi-bin/carddisp.pl?gene=MMP8
LIPC	Lipase C, Hepatic Type	Protein Coding	45	GC15P058410	0.972554	https://www.genecards.org/cgi-bin/carddisp.pl?gene=LIPC
IL1R1	Interleukin 1 Receptor Type 1	Protein Coding	44	GC02P102136	0.972554	https://www.genecards.org/cgi-bin/carddisp.pl?gene=IL1R1
GPD1	Glycerol-3-Phosphate Dehydrogenase 1	Protein Coding	44	GC12P050105	0.972554	https://www.genecards.org/cgi-bin/carddisp.pl?gene=GPD1
HAMP	Hepcidin Antimicrobial Peptide	Protein Coding	44	GC19P042456	0.972554	https://www.genecards.org/cgi-bin/carddisp.pl?gene=HAMP
SLC6A2	Solute Carrier Family 6 Member 2	Protein Coding	48	GC16P055656	0.970258	https://www.genecards.org/cgi-bin/carddisp.pl?gene=SLC6A2
PTGER3	Prostaglandin E Receptor 3	Protein Coding	46	GC01M070852	0.96798	https://www.genecards.org/cgi-bin/carddisp.pl?gene=PTGER3
THBS1	Thrombospondin 1	Protein Coding	44	GC15P039581	0.954629	https://www.genecards.org/cgi-bin/carddisp.pl?gene=THBS1
TCN1	Transcobalamin 1	Protein Coding	40	GC11M074226	0.954629	https://www.genecards.org/cgi-bin/carddisp.pl?gene=TCN1
IL7	Interleukin 7	Protein Coding	41	GC08M078689	0.944059	https://www.genecards.org/cgi-bin/carddisp.pl?gene=IL7
IL15	Interleukin 15	Protein Coding	40	GC04P141636	0.944059	https://www.genecards.org/cgi-bin/carddisp.pl?gene=IL15
SNORD116-1	Small Nucleolar RNA, C/D Box 116-1	RNA Gene	14	GC15P028273	0.943267	https://www.genecards.org/cgi-bin/carddisp.pl?gene=SNORD116-1
PTS	6-Pyruvoyltetrahydropterin Synthase	Protein Coding	46	GC11P112226	0.941047	https://www.genecards.org/cgi-bin/carddisp.pl?gene=PTS
PPP2R5A	Protein Phosphatase 2 Regulatory Subunit B'Alpha	Protein Coding	40	GC01P212285	0.935937	https://www.genecards.org/cgi-bin/carddisp.pl?gene=PPP2R5A
TRPV6	Transient Receptor Potential Cation Channel Subfamily V Member 6	Protein Coding	46	GC07M142871	0.933912	https://www.genecards.org/cgi-bin/carddisp.pl?gene=TRPV6
TRPV5	Transient Receptor Potential Cation Channel Subfamily V Member 5	Protein Coding	45	GC07M142908	0.933912	https://www.genecards.org/cgi-bin/carddisp.pl?gene=TRPV5
MIR494	MicroRNA 494	RNA Gene	17	GC14P107293	0.931549	https://www.genecards.org/cgi-bin/carddisp.pl?gene=MIR494
SNHG14	Small Nucleolar RNA Host Gene 14	RNA Gene	16	GC15P028265	0.927007	https://www.genecards.org/cgi-bin/carddisp.pl?gene=SNHG14
ATP1A2	ATPase Na+/K+ Transporting Subunit Alpha 2	Protein Coding	47	GC01P160115	0.92675	https://www.genecards.org/cgi-bin/carddisp.pl?gene=ATP1A2
PRDX6	Peroxiredoxin 6	Protein Coding	45	GC01P173477	0.926676	https://www.genecards.org/cgi-bin/carddisp.pl?gene=PRDX6
UCP1	Uncoupling Protein 1	Protein Coding	44	GC04M140559	0.926676	https://www.genecards.org/cgi-bin/carddisp.pl?gene=UCP1
THPO	Thrombopoietin	Protein Coding	41	GC03M184371	0.917185	https://www.genecards.org/cgi-bin/carddisp.pl?gene=THPO
CHRM3	Cholinergic Receptor Muscarinic 3	Protein Coding	48	GC01P239386	0.912924	https://www.genecards.org/cgi-bin/carddisp.pl?gene=CHRM3
BRINP1	BMP/Retinoic Acid Inducible Neural Specific 1	Protein Coding	32	GC09M119153	0.912672	https://www.genecards.org/cgi-bin/carddisp.pl?gene=BRINP1
FXN	Frataxin	Protein Coding	45	GC09P069035	0.904098	https://www.genecards.org/cgi-bin/carddisp.pl?gene=FXN
SLC7A2	Solute Carrier Family 7 Member 2	Protein Coding	42	GC08P017497	0.902328	https://www.genecards.org/cgi-bin/carddisp.pl?gene=SLC7A2
GIPR	Gastric Inhibitory Polypeptide Receptor	Protein Coding	44	GC19P045668	0.900582	https://www.genecards.org/cgi-bin/carddisp.pl?gene=GIPR
VGF	VGF Nerve Growth Factor Inducible	Protein Coding	37	GC07M101162	0.897539	https://www.genecards.org/cgi-bin/carddisp.pl?gene=VGF
DUSP1	Dual Specificity Phosphatase 1	Protein Coding	46	GC05M172768	0.896638	https://www.genecards.org/cgi-bin/carddisp.pl?gene=DUSP1
RNY5	RNA, Ro60-Associated Y5	RNA Gene	12	GC07P148941	0.896585	https://www.genecards.org/cgi-bin/carddisp.pl?gene=RNY5
ENOX2	Ecto-NOX Disulfide-Thiol Exchanger 2	Protein Coding	37	GC0XM130623	0.894935	https://www.genecards.org/cgi-bin/carddisp.pl?gene=ENOX2
CDKN1B	Cyclin Dependent Kinase Inhibitor 1B	Protein Coding	46	GC12P014505	0.890124	https://www.genecards.org/cgi-bin/carddisp.pl?gene=CDKN1B
CACNA1A	Calcium Voltage-Gated Channel Subunit Alpha1 A	Protein Coding	46	GC19M013206	0.878485	https://www.genecards.org/cgi-bin/carddisp.pl?gene=CACNA1A
PSEN2	Presenilin 2	Protein Coding	49	GC01P226870	0.877646	https://www.genecards.org/cgi-bin/carddisp.pl?gene=PSEN2
DHCR7	7-Dehydrocholesterol Reductase	Protein Coding	45	GC11M071428	0.877646	https://www.genecards.org/cgi-bin/carddisp.pl?gene=DHCR7
TAF1	TATA-Box Binding Protein Associated Factor 1	Protein Coding	45	GC0XP071366	0.877646	https://www.genecards.org/cgi-bin/carddisp.pl?gene=TAF1
ATP10A	ATPase Phospholipid Transporting 10A (Putative)	Protein Coding	39	GC15M025666	0.877646	https://www.genecards.org/cgi-bin/carddisp.pl?gene=ATP10A
TELO2	Telomere Maintenance 2	Protein Coding	39	GC16P001493	0.877646	https://www.genecards.org/cgi-bin/carddisp.pl?gene=TELO2
KIF15	Kinesin Family Member 15	Protein Coding	36	GC03P045808	0.877646	https://www.genecards.org/cgi-bin/carddisp.pl?gene=KIF15
KCNJ1	Potassium Inwardly Rectifying Channel Subfamily J Member 1	Protein Coding	47	GC11M128741	0.87459	https://www.genecards.org/cgi-bin/carddisp.pl?gene=KCNJ1
PKLR	Pyruvate Kinase L/R	Protein Coding	46	GC01M155289	0.87459	https://www.genecards.org/cgi-bin/carddisp.pl?gene=PKLR
ACTL6A	Actin Like 6A	Protein Coding	41	GC03P179562	0.87459	https://www.genecards.org/cgi-bin/carddisp.pl?gene=ACTL6A
SEC13	SEC13 Homolog, Nuclear Pore And COPII Coat Complex Component	Protein Coding	41	GC03M010293	0.87459	https://www.genecards.org/cgi-bin/carddisp.pl?gene=SEC13
SLC34A3	Solute Carrier Family 34 Member 3	Protein Coding	41	GC09P137230	0.87459	https://www.genecards.org/cgi-bin/carddisp.pl?gene=SLC34A3
CLPX	Caseinolytic Mitochondrial Matrix Peptidase Chaperone Subunit X	Protein Coding	40	GC15M065148	0.87459	https://www.genecards.org/cgi-bin/carddisp.pl?gene=CLPX
PHEX	Phosphate Regulating Endopeptidase Homolog X-Linked	Protein Coding	40	GC0XP022032	0.87459	https://www.genecards.org/cgi-bin/carddisp.pl?gene=PHEX
UNC45B	Unc-45 Myosin Chaperone B	Protein Coding	39	GC17P035148	0.87459	https://www.genecards.org/cgi-bin/carddisp.pl?gene=UNC45B
MYL5	Myosin Light Chain 5	Protein Coding	36	GC04P000673	0.87459	https://www.genecards.org/cgi-bin/carddisp.pl?gene=MYL5
CTSD	Cathepsin D	Protein Coding	50	GC11M001752	0.858295	https://www.genecards.org/cgi-bin/carddisp.pl?gene=CTSD
MGP	Matrix Gla Protein	Protein Coding	41	GC12M017010	0.857075	https://www.genecards.org/cgi-bin/carddisp.pl?gene=MGP
AR	Androgen Receptor	Protein Coding	52	GC0XP067544	0.857	https://www.genecards.org/cgi-bin/carddisp.pl?gene=AR
BCL2A1	BCL2 Related Protein A1	Protein Coding	40	GC15M079961	0.857	https://www.genecards.org/cgi-bin/carddisp.pl?gene=BCL2A1
CYP11A1	Cytochrome P450 Family 11 Subfamily A Member 1	Protein Coding	49	GC15M074337	0.849425	https://www.genecards.org/cgi-bin/carddisp.pl?gene=CYP11A1
WEE1	WEE1 G2 Checkpoint Kinase	Protein Coding	45	GC11P009573	0.849405	https://www.genecards.org/cgi-bin/carddisp.pl?gene=WEE1
APLNR	Apelin Receptor	Protein Coding	42	GC11M057233	0.849405	https://www.genecards.org/cgi-bin/carddisp.pl?gene=APLNR
NMB	Neuromedin B	Protein Coding	40	GC15M084655	0.849405	https://www.genecards.org/cgi-bin/carddisp.pl?gene=NMB
C3orf70	Chromosome 3 Open Reading Frame 70	Protein Coding	26	GC03M185078	0.847952	https://www.genecards.org/cgi-bin/carddisp.pl?gene=C3orf70
NUP98	Nucleoporin 98 And 96 Precursor	Protein Coding	42	GC11M003671	0.847515	https://www.genecards.org/cgi-bin/carddisp.pl?gene=NUP98
RAE1	Ribonucleic Acid Export 1	Protein Coding	40	GC20P057351	0.847515	https://www.genecards.org/cgi-bin/carddisp.pl?gene=RAE1
GPRASP1	G Protein-Coupled Receptor Associated Sorting Protein 1	Protein Coding	34	GC0XP102651	0.847515	https://www.genecards.org/cgi-bin/carddisp.pl?gene=GPRASP1
AKAP13	A-Kinase Anchoring Protein 13	Protein Coding	43	GC15P085720	0.840746	https://www.genecards.org/cgi-bin/carddisp.pl?gene=AKAP13
CTCF	CCCTC-Binding Factor	Protein Coding	46	GC16P067563	0.840292	https://www.genecards.org/cgi-bin/carddisp.pl?gene=CTCF
CDH1	Cadherin 1	Protein Coding	49	GC16P068737	0.837368	https://www.genecards.org/cgi-bin/carddisp.pl?gene=CDH1
ANGPTL2	Angiopoietin Like 2	Protein Coding	34	GC09M127087	0.837368	https://www.genecards.org/cgi-bin/carddisp.pl?gene=ANGPTL2
SLC17A5	Solute Carrier Family 17 Member 5	Protein Coding	44	GC06M073593	0.829005	https://www.genecards.org/cgi-bin/carddisp.pl?gene=SLC17A5
PSMD12	Proteasome 26S Subunit, Non-ATPase 12	Protein Coding	42	GC17M067337	0.823567	https://www.genecards.org/cgi-bin/carddisp.pl?gene=PSMD12
PRKCZ	Protein Kinase C Zeta	Protein Coding	48	GC01P002050	0.821713	https://www.genecards.org/cgi-bin/carddisp.pl?gene=PRKCZ
F5	Coagulation Factor V	Protein Coding	45	GC01M169511	0.821713	https://www.genecards.org/cgi-bin/carddisp.pl?gene=F5
GRN	Granulin Precursor	Protein Coding	45	GC17P044345	0.821713	https://www.genecards.org/cgi-bin/carddisp.pl?gene=GRN
SPP1	Secreted Phosphoprotein 1	Protein Coding	45	GC04P087975	0.821713	https://www.genecards.org/cgi-bin/carddisp.pl?gene=SPP1
CTNS	Cystinosin, Lysosomal Cystine Transporter	Protein Coding	44	GC17P003636	0.821713	https://www.genecards.org/cgi-bin/carddisp.pl?gene=CTNS
ADAMTS7	ADAM Metallopeptidase With Thrombospondin Type 1 Motif 7	Protein Coding	39	GC15M078759	0.821713	https://www.genecards.org/cgi-bin/carddisp.pl?gene=ADAMTS7
FCGRT	Fc Fragment Of IgG Receptor And Transporter	Protein Coding	39	GC19P049506	0.821713	https://www.genecards.org/cgi-bin/carddisp.pl?gene=FCGRT
PTH2R	Parathyroid Hormone 2 Receptor	Protein Coding	44	GC02P208359	0.821281	https://www.genecards.org/cgi-bin/carddisp.pl?gene=PTH2R
SULT2A1	Sulfotransferase Family 2A Member 1	Protein Coding	43	GC19M047870	0.821281	https://www.genecards.org/cgi-bin/carddisp.pl?gene=SULT2A1
OGFR	Opioid Growth Factor Receptor	Protein Coding	37	GC20P062804	0.821281	https://www.genecards.org/cgi-bin/carddisp.pl?gene=OGFR
PROKR1	Prokineticin Receptor 1	Protein Coding	37	GC02P068643	0.821281	https://www.genecards.org/cgi-bin/carddisp.pl?gene=PROKR1
MC2R	Melanocortin 2 Receptor	Protein Coding	47	GC18M020355	0.819653	https://www.genecards.org/cgi-bin/carddisp.pl?gene=MC2R
VTN	Vitronectin	Protein Coding	42	GC17M031859	0.816021	https://www.genecards.org/cgi-bin/carddisp.pl?gene=VTN
PPP4C	Protein Phosphatase 4 Catalytic Subunit	Protein Coding	44	GC16P034472	0.812039	https://www.genecards.org/cgi-bin/carddisp.pl?gene=PPP4C
OXTR	Oxytocin Receptor	Protein Coding	45	GC03M008767	0.807603	https://www.genecards.org/cgi-bin/carddisp.pl?gene=OXTR
MYOC	Myocilin	Protein Coding	41	GC01M171604	0.807412	https://www.genecards.org/cgi-bin/carddisp.pl?gene=MYOC
RIPOR2	RHO Family Interacting Cell Polarization Regulator 2	Protein Coding	29	GC06M024805	0.807241	https://www.genecards.org/cgi-bin/carddisp.pl?gene=RIPOR2
SUGP1	SURP And G-Patch Domain Containing 1	Protein Coding	34	GC19M019276	0.804007	https://www.genecards.org/cgi-bin/carddisp.pl?gene=SUGP1
TACR1	Tachykinin Receptor 1	Protein Coding	45	GC02M075010	0.797384	https://www.genecards.org/cgi-bin/carddisp.pl?gene=TACR1
NPFF	Neuropeptide FF-Amide Peptide Precursor	Protein Coding	36	GC12M053516	0.79562	https://www.genecards.org/cgi-bin/carddisp.pl?gene=NPFF
ADRB3	Adrenoceptor Beta 3	Protein Coding	45	GC08M037962	0.795514	https://www.genecards.org/cgi-bin/carddisp.pl?gene=ADRB3
TTF2	Transcription Termination Factor 2	Protein Coding	39	GC01P117060	0.795514	https://www.genecards.org/cgi-bin/carddisp.pl?gene=TTF2
DEFB1	Defensin Beta 1	Protein Coding	38	GC08M006870	0.795514	https://www.genecards.org/cgi-bin/carddisp.pl?gene=DEFB1
EIF3B	Eukaryotic Translation Initiation Factor 3 Subunit B	Protein Coding	38	GC07P002354	0.795514	https://www.genecards.org/cgi-bin/carddisp.pl?gene=EIF3B
TOR2A	Torsin Family 2 Member A	Protein Coding	36	GC09M127758	0.795514	https://www.genecards.org/cgi-bin/carddisp.pl?gene=TOR2A
CDC73	Cell Division Cycle 73	Protein Coding	44	GC01P193121	0.794562	https://www.genecards.org/cgi-bin/carddisp.pl?gene=CDC73
CD79A	CD79a Molecule	Protein Coding	45	GC19P041877	0.792502	https://www.genecards.org/cgi-bin/carddisp.pl?gene=CD79A
PTGFR	Prostaglandin F Receptor	Protein Coding	44	GC01P078303	0.792502	https://www.genecards.org/cgi-bin/carddisp.pl?gene=PTGFR
P2RX4	Purinergic Receptor P2X 4	Protein Coding	42	GC12P124174	0.792502	https://www.genecards.org/cgi-bin/carddisp.pl?gene=P2RX4
P2RX6	Purinergic Receptor P2X 6	Protein Coding	41	GC22P028087	0.792502	https://www.genecards.org/cgi-bin/carddisp.pl?gene=P2RX6
UMOD	Uromodulin	Protein Coding	41	GC16M020344	0.792502	https://www.genecards.org/cgi-bin/carddisp.pl?gene=UMOD
GUCA2B	Guanylate Cyclase Activator 2B	Protein Coding	38	GC01P042153	0.792502	https://www.genecards.org/cgi-bin/carddisp.pl?gene=GUCA2B
RARRES2	Retinoic Acid Receptor Responder 2	Protein Coding	38	GC07M150333	0.792502	https://www.genecards.org/cgi-bin/carddisp.pl?gene=RARRES2
CAVIN2	Caveolae Associated Protein 2	Protein Coding	29	GC02M191835	0.787896	https://www.genecards.org/cgi-bin/carddisp.pl?gene=CAVIN2
AKT2	AKT Serine/Threonine Kinase 2	Protein Coding	53	GC19M040230	0.785096	https://www.genecards.org/cgi-bin/carddisp.pl?gene=AKT2
CACNA1F	Calcium Voltage-Gated Channel Subunit Alpha1 F	Protein Coding	44	GC0XM049205	0.785096	https://www.genecards.org/cgi-bin/carddisp.pl?gene=CACNA1F
KCNQ5	Potassium Voltage-Gated Channel Subfamily Q Member 5	Protein Coding	42	GC06P072621	0.785096	https://www.genecards.org/cgi-bin/carddisp.pl?gene=KCNQ5
MTAP	Methylthioadenosine Phosphorylase	Protein Coding	47	GC09P021792	0.783915	https://www.genecards.org/cgi-bin/carddisp.pl?gene=MTAP
ITGA2	Integrin Subunit Alpha 2	Protein Coding	45	GC05P052989	0.772513	https://www.genecards.org/cgi-bin/carddisp.pl?gene=ITGA2
GCKR	Glucokinase Regulator	Protein Coding	41	GC02P027496	0.772513	https://www.genecards.org/cgi-bin/carddisp.pl?gene=GCKR
FN1	Fibronectin 1	Protein Coding	49	GC02M215360	0.76851	https://www.genecards.org/cgi-bin/carddisp.pl?gene=FN1
CLU	Clusterin	Protein Coding	45	GC08M027596	0.76851	https://www.genecards.org/cgi-bin/carddisp.pl?gene=CLU
FTL	Ferritin Light Chain	Protein Coding	46	GC19P048965	0.764453	https://www.genecards.org/cgi-bin/carddisp.pl?gene=FTL
POU1F1	POU Class 1 Homeobox 1	Protein Coding	42	GC03M087259	0.764453	https://www.genecards.org/cgi-bin/carddisp.pl?gene=POU1F1
RLN3	Relaxin 3	Protein Coding	35	GC19P014053	0.764095	https://www.genecards.org/cgi-bin/carddisp.pl?gene=RLN3
DRD5	Dopamine Receptor D5	Protein Coding	47	GC04P009783	0.760674	https://www.genecards.org/cgi-bin/carddisp.pl?gene=DRD5
RHOA	Ras Homolog Family Member A	Protein Coding	46	GC03M049359	0.756036	https://www.genecards.org/cgi-bin/carddisp.pl?gene=RHOA
GAD2	Glutamate Decarboxylase 2	Protein Coding	45	GC10P026216	0.756036	https://www.genecards.org/cgi-bin/carddisp.pl?gene=GAD2
ALDH2	Aldehyde Dehydrogenase 2 Family Member	Protein Coding	49	GC12P111766	0.754535	https://www.genecards.org/cgi-bin/carddisp.pl?gene=ALDH2
SELL	Selectin L	Protein Coding	42	GC01M169690	0.754535	https://www.genecards.org/cgi-bin/carddisp.pl?gene=SELL
NPAS3	Neuronal PAS Domain Protein 3	Protein Coding	38	GC14P032934	0.754535	https://www.genecards.org/cgi-bin/carddisp.pl?gene=NPAS3
TMEM11	Transmembrane Protein 11	Protein Coding	34	GC17M021197	0.754535	https://www.genecards.org/cgi-bin/carddisp.pl?gene=TMEM11
CD9	CD9 Molecule	Protein Coding	42	GC12P014156	0.752038	https://www.genecards.org/cgi-bin/carddisp.pl?gene=CD9
LMOD1	Leiomodin 1	Protein Coding	40	GC01M201896	0.752038	https://www.genecards.org/cgi-bin/carddisp.pl?gene=LMOD1
FADS1	Fatty Acid Desaturase 1	Protein Coding	44	GC11M061799	0.748041	https://www.genecards.org/cgi-bin/carddisp.pl?gene=FADS1
CCND1	Cyclin D1	Protein Coding	51	GC11P069641	0.744388	https://www.genecards.org/cgi-bin/carddisp.pl?gene=CCND1
DISC1	DISC1 Scaffold Protein	Protein Coding	42	GC01P231626	0.744388	https://www.genecards.org/cgi-bin/carddisp.pl?gene=DISC1
SLC6A9	Solute Carrier Family 6 Member 9	Protein Coding	48	GC01M043991	0.741685	https://www.genecards.org/cgi-bin/carddisp.pl?gene=SLC6A9
CHRNA2	Cholinergic Receptor Nicotinic Alpha 2 Subunit	Protein Coding	46	GC08M027459	0.741685	https://www.genecards.org/cgi-bin/carddisp.pl?gene=CHRNA2
ACTB	Actin Beta	Protein Coding	48	GC07M005527	0.725002	https://www.genecards.org/cgi-bin/carddisp.pl?gene=ACTB
CIT	Citron Rho-Interacting Serine/Threonine Kinase	Protein Coding	46	GC12M119650	0.725002	https://www.genecards.org/cgi-bin/carddisp.pl?gene=CIT
CDH5	Cadherin 5	Protein Coding	46	GC16P066366	0.725002	https://www.genecards.org/cgi-bin/carddisp.pl?gene=CDH5
PDE5A	Phosphodiesterase 5A	Protein Coding	44	GC04M119494	0.725002	https://www.genecards.org/cgi-bin/carddisp.pl?gene=PDE5A
CANX	Calnexin	Protein Coding	43	GC05P179678	0.725002	https://www.genecards.org/cgi-bin/carddisp.pl?gene=CANX
BRS3	Bombesin Receptor Subtype 3	Protein Coding	42	GC0XP136482	0.725002	https://www.genecards.org/cgi-bin/carddisp.pl?gene=BRS3
TMSB4X	Thymosin Beta 4 X-Linked	Protein Coding	40	GC0XP012975	0.725002	https://www.genecards.org/cgi-bin/carddisp.pl?gene=TMSB4X
UBR4	Ubiquitin Protein Ligase E3 Component N-Recognin 4	Protein Coding	38	GC01M019074	0.725002	https://www.genecards.org/cgi-bin/carddisp.pl?gene=UBR4
DHFR	Dihydrofolate Reductase	Protein Coding	48	GC05M080626	0.720428	https://www.genecards.org/cgi-bin/carddisp.pl?gene=DHFR
HIF1AN	Hypoxia Inducible Factor 1 Subunit Alpha Inhibitor	Protein Coding	44	GC10P100529	0.720428	https://www.genecards.org/cgi-bin/carddisp.pl?gene=HIF1AN
MT2A	Metallothionein 2A	Protein Coding	42	GC16P056800	0.720428	https://www.genecards.org/cgi-bin/carddisp.pl?gene=MT2A
UBQLN4	Ubiquilin 4	Protein Coding	40	GC01M156033	0.720428	https://www.genecards.org/cgi-bin/carddisp.pl?gene=UBQLN4
ZBTB20	Zinc Finger And BTB Domain Containing 20	Protein Coding	40	GC03M114315	0.720428	https://www.genecards.org/cgi-bin/carddisp.pl?gene=ZBTB20
NEIL1	Nei Like DNA Glycosylase 1	Protein Coding	38	GC15P075346	0.720428	https://www.genecards.org/cgi-bin/carddisp.pl?gene=NEIL1
MAP2K1	Mitogen-Activated Protein Kinase Kinase 1	Protein Coding	53	GC15P066386	0.718023	https://www.genecards.org/cgi-bin/carddisp.pl?gene=MAP2K1
ARRB2	Arrestin Beta 2	Protein Coding	44	GC17P004711	0.717918	https://www.genecards.org/cgi-bin/carddisp.pl?gene=ARRB2
USP46	Ubiquitin Specific Peptidase 46	Protein Coding	38	GC04M052590	0.716446	https://www.genecards.org/cgi-bin/carddisp.pl?gene=USP46
DIO3	Iodothyronine Deiodinase 3	Protein Coding	40	GC14P107071	0.711058	https://www.genecards.org/cgi-bin/carddisp.pl?gene=DIO3
ODC1	Ornithine Decarboxylase 1	Protein Coding	48	GC02M010432	0.711028	https://www.genecards.org/cgi-bin/carddisp.pl?gene=ODC1
CDC25A	Cell Division Cycle 25A	Protein Coding	46	GC03M048173	0.711028	https://www.genecards.org/cgi-bin/carddisp.pl?gene=CDC25A
NR4A1	Nuclear Receptor Subfamily 4 Group A Member 1	Protein Coding	46	GC12P052022	0.711028	https://www.genecards.org/cgi-bin/carddisp.pl?gene=NR4A1
FOSB	FosB Proto-Oncogene, AP-1 Transcription Factor Subunit	Protein Coding	41	GC19P045467	0.711028	https://www.genecards.org/cgi-bin/carddisp.pl?gene=FOSB
JUNB	JunB Proto-Oncogene, AP-1 Transcription Factor Subunit	Protein Coding	41	GC19P012791	0.711028	https://www.genecards.org/cgi-bin/carddisp.pl?gene=JUNB
MIR122	MicroRNA 122	RNA Gene	21	GC18P058451	0.711028	https://www.genecards.org/cgi-bin/carddisp.pl?gene=MIR122
RUNX2	RUNX Family Transcription Factor 2	Protein Coding	47	GC06P061392	0.705067	https://www.genecards.org/cgi-bin/carddisp.pl?gene=RUNX2
SLC18A3	Solute Carrier Family 18 Member A3	Protein Coding	43	GC10P049610	0.705067	https://www.genecards.org/cgi-bin/carddisp.pl?gene=SLC18A3
SLC5A7	Solute Carrier Family 5 Member 7	Protein Coding	42	GC02P107969	0.705067	https://www.genecards.org/cgi-bin/carddisp.pl?gene=SLC5A7
SLC24A3	Solute Carrier Family 24 Member 3	Protein Coding	38	GC20P019212	0.692358	https://www.genecards.org/cgi-bin/carddisp.pl?gene=SLC24A3
PHB2	Prohibitin 2	Protein Coding	40	GC12M006965	0.692254	https://www.genecards.org/cgi-bin/carddisp.pl?gene=PHB2
NFKBIA	NFKB Inhibitor Alpha	Protein Coding	49	GC14M035401	0.667551	https://www.genecards.org/cgi-bin/carddisp.pl?gene=NFKBIA
OPRK1	Opioid Receptor Kappa 1	Protein Coding	45	GC08M053227	0.667551	https://www.genecards.org/cgi-bin/carddisp.pl?gene=OPRK1
IRS2	Insulin Receptor Substrate 2	Protein Coding	44	GC13M109752	0.667551	https://www.genecards.org/cgi-bin/carddisp.pl?gene=IRS2
RAPGEF3	Rap Guanine Nucleotide Exchange Factor 3	Protein Coding	44	GC12M047736	0.667551	https://www.genecards.org/cgi-bin/carddisp.pl?gene=RAPGEF3
NAT2	N-Acetyltransferase 2	Protein Coding	42	GC08P018391	0.667551	https://www.genecards.org/cgi-bin/carddisp.pl?gene=NAT2
HBA1	Hemoglobin Subunit Alpha 1	Protein Coding	41	GC16P006709	0.667551	https://www.genecards.org/cgi-bin/carddisp.pl?gene=HBA1
PTX3	Pentraxin 3	Protein Coding	41	GC03P157436	0.667551	https://www.genecards.org/cgi-bin/carddisp.pl?gene=PTX3
FHL5	Four And A Half LIM Domains 5	Protein Coding	37	GC06P096562	0.667551	https://www.genecards.org/cgi-bin/carddisp.pl?gene=FHL5
CYP20A1	Cytochrome P450 Family 20 Subfamily A Member 1	Protein Coding	36	GC02P203238	0.667551	https://www.genecards.org/cgi-bin/carddisp.pl?gene=CYP20A1
G6PC1	Glucose-6-Phosphatase Catalytic Subunit 1	Protein Coding	35	GC17P045400	0.667551	https://www.genecards.org/cgi-bin/carddisp.pl?gene=G6PC1
LOC109279247	FGF21/FUT1 Promoter Region	Biological Region	1	GC19P048802	0.667551	https://www.genecards.org/cgi-bin/carddisp.pl?gene=LOC109279247
STIN2-VNTR	Serotonin Transporter Intronic VNTR Enhancer	Biological Region	1	GC17P030221	0.667551	https://www.genecards.org/cgi-bin/carddisp.pl?gene=STIN2-VNTR
QRFP	Pyroglutamylated RFamide Peptide	Protein Coding	29	GC09M130892	0.667476	https://www.genecards.org/cgi-bin/carddisp.pl?gene=QRFP
STXBP1	Syntaxin Binding Protein 1	Protein Coding	48	GC09P127582	0.666997	https://www.genecards.org/cgi-bin/carddisp.pl?gene=STXBP1
IBSP	Integrin Binding Sialoprotein	Protein Coding	36	GC04P087799	0.661146	https://www.genecards.org/cgi-bin/carddisp.pl?gene=IBSP
CUL4B	Cullin 4B	Protein Coding	43	GC0XM120524	0.659416	https://www.genecards.org/cgi-bin/carddisp.pl?gene=CUL4B
SLC32A1	Solute Carrier Family 32 Member 1	Protein Coding	42	GC20P038724	0.658973	https://www.genecards.org/cgi-bin/carddisp.pl?gene=SLC32A1
IL6R	Interleukin 6 Receptor	Protein Coding	48	GC01P154405	0.647075	https://www.genecards.org/cgi-bin/carddisp.pl?gene=IL6R
COMP	Cartilage Oligomeric Matrix Protein	Protein Coding	47	GC19M018783	0.647075	https://www.genecards.org/cgi-bin/carddisp.pl?gene=COMP
CCR5	C-C Motif Chemokine Receptor 5	Protein Coding	45	GC03P046383	0.647075	https://www.genecards.org/cgi-bin/carddisp.pl?gene=CCR5
FKBP5	FKBP Prolyl Isomerase 5	Protein Coding	45	GC06M051553	0.647075	https://www.genecards.org/cgi-bin/carddisp.pl?gene=FKBP5
CCR2	C-C Motif Chemokine Receptor 2	Protein Coding	44	GC03P046356	0.647075	https://www.genecards.org/cgi-bin/carddisp.pl?gene=CCR2
HRH2	Histamine Receptor H2	Protein Coding	44	GC05P175659	0.647075	https://www.genecards.org/cgi-bin/carddisp.pl?gene=HRH2
GABRA6	Gamma-Aminobutyric Acid Type A Receptor Subunit Alpha6	Protein Coding	44	GC05P161547	0.647075	https://www.genecards.org/cgi-bin/carddisp.pl?gene=GABRA6
DLK1	Delta Like Non-Canonical Notch Ligand 1	Protein Coding	43	GC14P107072	0.647075	https://www.genecards.org/cgi-bin/carddisp.pl?gene=DLK1
LTF	Lactotransferrin	Protein Coding	43	GC03M046435	0.647075	https://www.genecards.org/cgi-bin/carddisp.pl?gene=LTF
INHBB	Inhibin Subunit Beta B	Protein Coding	41	GC02P120517	0.647075	https://www.genecards.org/cgi-bin/carddisp.pl?gene=INHBB
LCN1	Lipocalin 1	Protein Coding	39	GC09P135521	0.647075	https://www.genecards.org/cgi-bin/carddisp.pl?gene=LCN1
SCGB1A1	Secretoglobin Family 1A Member 1	Protein Coding	39	GC11P062405	0.647075	https://www.genecards.org/cgi-bin/carddisp.pl?gene=SCGB1A1
PMCH	Pro-Melanin Concentrating Hormone	Protein Coding	36	GC12M102196	0.647075	https://www.genecards.org/cgi-bin/carddisp.pl?gene=PMCH
GRIK2	Glutamate Ionotropic Receptor Kainate Type Subunit 2	Protein Coding	46	GC06P100962	0.630933	https://www.genecards.org/cgi-bin/carddisp.pl?gene=GRIK2
CAMK4	Calcium/Calmodulin Dependent Protein Kinase IV	Protein Coding	45	GC05P111223	0.630933	https://www.genecards.org/cgi-bin/carddisp.pl?gene=CAMK4
PPP3CC	Protein Phosphatase 3 Catalytic Subunit Gamma	Protein Coding	44	GC08P022440	0.630933	https://www.genecards.org/cgi-bin/carddisp.pl?gene=PPP3CC
PPP2R3C	Protein Phosphatase 2 Regulatory Subunit B''Gamma	Protein Coding	39	GC14M035085	0.630933	https://www.genecards.org/cgi-bin/carddisp.pl?gene=PPP2R3C
GRK3	G Protein-Coupled Receptor Kinase 3	Protein Coding	38	GC22P028371	0.630933	https://www.genecards.org/cgi-bin/carddisp.pl?gene=GRK3
TNFRSF1B	TNF Receptor Superfamily Member 1B	Protein Coding	46	GC01P012167	0.628177	https://www.genecards.org/cgi-bin/carddisp.pl?gene=TNFRSF1B
IRS1	Insulin Receptor Substrate 1	Protein Coding	46	GC02M226731	0.619965	https://www.genecards.org/cgi-bin/carddisp.pl?gene=IRS1
CX3CR1	C-X3-C Motif Chemokine Receptor 1	Protein Coding	44	GC03M039279	0.619965	https://www.genecards.org/cgi-bin/carddisp.pl?gene=CX3CR1
SOCS1	Suppressor Of Cytokine Signaling 1	Protein Coding	42	GC16M011255	0.619965	https://www.genecards.org/cgi-bin/carddisp.pl?gene=SOCS1
MPDZ	Multiple PDZ Domain Crumbs Cell Polarity Complex Component	Protein Coding	44	GC09M013095	0.617638	https://www.genecards.org/cgi-bin/carddisp.pl?gene=MPDZ
TPO	Thyroid Peroxidase	Protein Coding	47	GC02P001374	0.615466	https://www.genecards.org/cgi-bin/carddisp.pl?gene=TPO
PTK2	Protein Tyrosine Kinase 2	Protein Coding	46	GC08M140657	0.615466	https://www.genecards.org/cgi-bin/carddisp.pl?gene=PTK2
LBX1	Ladybird Homeobox 1	Protein Coding	37	GC10M101226	0.615466	https://www.genecards.org/cgi-bin/carddisp.pl?gene=LBX1
EGF	Epidermal Growth Factor	Protein Coding	49	GC04P109912	0.606096	https://www.genecards.org/cgi-bin/carddisp.pl?gene=EGF
CYP17A1	Cytochrome P450 Family 17 Subfamily A Member 1	Protein Coding	48	GC10M102830	0.606096	https://www.genecards.org/cgi-bin/carddisp.pl?gene=CYP17A1
AMBP	Alpha-1-Microglobulin/Bikunin Precursor	Protein Coding	41	GC09M114060	0.606096	https://www.genecards.org/cgi-bin/carddisp.pl?gene=AMBP
LOC102724058	Uncharacterized LOC102724058	RNA Gene	6	GC02P165958	0.606096	https://www.genecards.org/cgi-bin/carddisp.pl?gene=LOC102724058
RPS6KA1	Ribosomal Protein S6 Kinase A1	Protein Coding	49	GC01P026540	0.605991	https://www.genecards.org/cgi-bin/carddisp.pl?gene=RPS6KA1
SKP2	S-Phase Kinase Associated Protein 2	Protein Coding	44	GC05P036151	0.605991	https://www.genecards.org/cgi-bin/carddisp.pl?gene=SKP2
FBXO31	F-Box Protein 31	Protein Coding	36	GC16M087326	0.605991	https://www.genecards.org/cgi-bin/carddisp.pl?gene=FBXO31
GAPVD1	GTPase Activating Protein And VPS9 Domains 1	Protein Coding	38	GC09P125261	0.604288	https://www.genecards.org/cgi-bin/carddisp.pl?gene=GAPVD1
HSPA4	Heat Shock Protein Family A (Hsp70) Member 4	Protein Coding	41	GC05P133051	0.602115	https://www.genecards.org/cgi-bin/carddisp.pl?gene=HSPA4
NQO2	N-Ribosyldihydronicotinamide:Quinone Reductase 2	Protein Coding	44	GC06P003039	0.589207	https://www.genecards.org/cgi-bin/carddisp.pl?gene=NQO2
NPHP1	Nephrocystin 1	Protein Coding	43	GC02M110122	0.581117	https://www.genecards.org/cgi-bin/carddisp.pl?gene=NPHP1
MYLK	Myosin Light Chain Kinase	Protein Coding	52	GC03M123610	0.574161	https://www.genecards.org/cgi-bin/carddisp.pl?gene=MYLK
ACTN1	Actinin Alpha 1	Protein Coding	49	GC14M068874	0.574161	https://www.genecards.org/cgi-bin/carddisp.pl?gene=ACTN1
CTNNA1	Catenin Alpha 1	Protein Coding	47	GC05P138613	0.574161	https://www.genecards.org/cgi-bin/carddisp.pl?gene=CTNNA1
BCL2L1	BCL2 Like 1	Protein Coding	46	GC20M031664	0.574161	https://www.genecards.org/cgi-bin/carddisp.pl?gene=BCL2L1
HSD17B4	Hydroxysteroid 17-Beta Dehydrogenase 4	Protein Coding	46	GC05P119452	0.574161	https://www.genecards.org/cgi-bin/carddisp.pl?gene=HSD17B4
WNK1	WNK Lysine Deficient Protein Kinase 1	Protein Coding	46	GC12P000733	0.574161	https://www.genecards.org/cgi-bin/carddisp.pl?gene=WNK1
ITGB5	Integrin Subunit Beta 5	Protein Coding	45	GC03M124761	0.574161	https://www.genecards.org/cgi-bin/carddisp.pl?gene=ITGB5
SLC1A4	Solute Carrier Family 1 Member 4	Protein Coding	44	GC02P064988	0.574161	https://www.genecards.org/cgi-bin/carddisp.pl?gene=SLC1A4
DMP1	Dentin Matrix Acidic Phosphoprotein 1	Protein Coding	41	GC04P087650	0.574161	https://www.genecards.org/cgi-bin/carddisp.pl?gene=DMP1
RND1	Rho Family GTPase 1	Protein Coding	37	GC12M048857	0.574161	https://www.genecards.org/cgi-bin/carddisp.pl?gene=RND1
IPO4	Importin 4	Protein Coding	36	GC14M024181	0.574161	https://www.genecards.org/cgi-bin/carddisp.pl?gene=IPO4
TNFSF11	TNF Superfamily Member 11	Protein Coding	46	GC13P042562	0.571025	https://www.genecards.org/cgi-bin/carddisp.pl?gene=TNFSF11
BCL2	BCL2 Apoptosis Regulator	Protein Coding	49	GC18M063123	0.569479	https://www.genecards.org/cgi-bin/carddisp.pl?gene=BCL2
ANKK1	Ankyrin Repeat And Kinase Domain Containing 1	Protein Coding	37	GC11P113387	0.563424	https://www.genecards.org/cgi-bin/carddisp.pl?gene=ANKK1
MSH6	MutS Homolog 6	Protein Coding	49	GC02P047695	0.562588	https://www.genecards.org/cgi-bin/carddisp.pl?gene=MSH6
PTGS2	Prostaglandin-Endoperoxide Synthase 2	Protein Coding	48	GC01M186640	0.562588	https://www.genecards.org/cgi-bin/carddisp.pl?gene=PTGS2
IL2RB	Interleukin 2 Receptor Subunit Beta	Protein Coding	47	GC22M037125	0.562588	https://www.genecards.org/cgi-bin/carddisp.pl?gene=IL2RB
AKR1B1	Aldo-Keto Reductase Family 1 Member B	Protein Coding	46	GC07M134442	0.562588	https://www.genecards.org/cgi-bin/carddisp.pl?gene=AKR1B1
SLC5A2	Solute Carrier Family 5 Member 2	Protein Coding	46	GC16P034609	0.562588	https://www.genecards.org/cgi-bin/carddisp.pl?gene=SLC5A2
NPR1	Natriuretic Peptide Receptor 1	Protein Coding	45	GC01P153744	0.562588	https://www.genecards.org/cgi-bin/carddisp.pl?gene=NPR1
COL18A1	Collagen Type XVIII Alpha 1 Chain	Protein Coding	44	GC21P045405	0.562588	https://www.genecards.org/cgi-bin/carddisp.pl?gene=COL18A1
TGFBI	Transforming Growth Factor Beta Induced	Protein Coding	44	GC05P136027	0.562588	https://www.genecards.org/cgi-bin/carddisp.pl?gene=TGFBI
SULT1A1	Sulfotransferase Family 1A Member 1	Protein Coding	42	GC16M028606	0.562588	https://www.genecards.org/cgi-bin/carddisp.pl?gene=SULT1A1
AADAC	Arylacetamide Deacetylase	Protein Coding	41	GC03P151813	0.562588	https://www.genecards.org/cgi-bin/carddisp.pl?gene=AADAC
IFNB1	Interferon Beta 1	Protein Coding	40	GC09M021077	0.562588	https://www.genecards.org/cgi-bin/carddisp.pl?gene=IFNB1
PTMA	Prothymosin Alpha	Protein Coding	40	GC02P231707	0.562588	https://www.genecards.org/cgi-bin/carddisp.pl?gene=PTMA
GALP	Galanin Like Peptide	Protein Coding	33	GC19P056176	0.562588	https://www.genecards.org/cgi-bin/carddisp.pl?gene=GALP
MERTK	MER Proto-Oncogene, Tyrosine Kinase	Protein Coding	49	GC02P111898	0.562514	https://www.genecards.org/cgi-bin/carddisp.pl?gene=MERTK
DUSP6	Dual Specificity Phosphatase 6	Protein Coding	48	GC12M089347	0.562514	https://www.genecards.org/cgi-bin/carddisp.pl?gene=DUSP6
PAH	Phenylalanine Hydroxylase	Protein Coding	48	GC12M102836	0.562514	https://www.genecards.org/cgi-bin/carddisp.pl?gene=PAH
QDPR	Quinoid Dihydropteridine Reductase	Protein Coding	47	GC04M017460	0.562514	https://www.genecards.org/cgi-bin/carddisp.pl?gene=QDPR
MBL2	Mannose Binding Lectin 2	Protein Coding	46	GC10M052760	0.562514	https://www.genecards.org/cgi-bin/carddisp.pl?gene=MBL2
CYP1A2	Cytochrome P450 Family 1 Subfamily A Member 2	Protein Coding	45	GC15P074748	0.562514	https://www.genecards.org/cgi-bin/carddisp.pl?gene=CYP1A2
EHMT2	Euchromatic Histone Lysine Methyltransferase 2	Protein Coding	45	GC06M031879	0.562514	https://www.genecards.org/cgi-bin/carddisp.pl?gene=EHMT2
CD81	CD81 Molecule	Protein Coding	45	GC11P002454	0.562514	https://www.genecards.org/cgi-bin/carddisp.pl?gene=CD81
MASP2	MBL Associated Serine Protease 2	Protein Coding	45	GC01M011026	0.562514	https://www.genecards.org/cgi-bin/carddisp.pl?gene=MASP2
ST3GAL3	ST3 Beta-Galactoside Alpha-2,3-Sialyltransferase 3	Protein Coding	45	GC01P043705	0.562514	https://www.genecards.org/cgi-bin/carddisp.pl?gene=ST3GAL3
CTSS	Cathepsin S	Protein Coding	44	GC01M150730	0.562514	https://www.genecards.org/cgi-bin/carddisp.pl?gene=CTSS
DDIT3	DNA Damage Inducible Transcript 3	Protein Coding	44	GC12M057516	0.562514	https://www.genecards.org/cgi-bin/carddisp.pl?gene=DDIT3
SAG	S-Antigen Visual Arrestin	Protein Coding	44	GC02P233338	0.562514	https://www.genecards.org/cgi-bin/carddisp.pl?gene=SAG
EEA1	Early Endosome Antigen 1	Protein Coding	43	GC12M092770	0.562514	https://www.genecards.org/cgi-bin/carddisp.pl?gene=EEA1
ATF3	Activating Transcription Factor 3	Protein Coding	43	GC01P212565	0.562514	https://www.genecards.org/cgi-bin/carddisp.pl?gene=ATF3
NFE2L1	Nuclear Factor, Erythroid 2 Like 1	Protein Coding	43	GC17P048049	0.562514	https://www.genecards.org/cgi-bin/carddisp.pl?gene=NFE2L1
DUSP4	Dual Specificity Phosphatase 4	Protein Coding	42	GC08M029334	0.562514	https://www.genecards.org/cgi-bin/carddisp.pl?gene=DUSP4
CHRNA9	Cholinergic Receptor Nicotinic Alpha 9 Subunit	Protein Coding	42	GC04P040337	0.562514	https://www.genecards.org/cgi-bin/carddisp.pl?gene=CHRNA9
HTR2B	5-Hydroxytryptamine Receptor 2B	Protein Coding	42	GC02M231108	0.562514	https://www.genecards.org/cgi-bin/carddisp.pl?gene=HTR2B
CEBPE	CCAAT Enhancer Binding Protein Epsilon	Protein Coding	41	GC14M023117	0.562514	https://www.genecards.org/cgi-bin/carddisp.pl?gene=CEBPE
IAPP	Islet Amyloid Polypeptide	Protein Coding	41	GC12P021354	0.562514	https://www.genecards.org/cgi-bin/carddisp.pl?gene=IAPP
FABP7	Fatty Acid Binding Protein 7	Protein Coding	41	GC06P122774	0.562514	https://www.genecards.org/cgi-bin/carddisp.pl?gene=FABP7
RGR	Retinal G Protein Coupled Receptor	Protein Coding	41	GC10P086690	0.562514	https://www.genecards.org/cgi-bin/carddisp.pl?gene=RGR
TRNT1	TRNA Nucleotidyl Transferase 1	Protein Coding	41	GC03P003126	0.562514	https://www.genecards.org/cgi-bin/carddisp.pl?gene=TRNT1
PRSS2	Serine Protease 2	Protein Coding	39	GC07P146404	0.562514	https://www.genecards.org/cgi-bin/carddisp.pl?gene=PRSS2
SAA4	Serum Amyloid A4, Constitutive	Protein Coding	38	GC11M018234	0.562514	https://www.genecards.org/cgi-bin/carddisp.pl?gene=SAA4
TRAPPC9	Trafficking Protein Particle Complex Subunit 9	Protein Coding	38	GC08M139728	0.562514	https://www.genecards.org/cgi-bin/carddisp.pl?gene=TRAPPC9
BATF3	Basic Leucine Zipper ATF-Like Transcription Factor 3	Protein Coding	37	GC01M212686	0.562514	https://www.genecards.org/cgi-bin/carddisp.pl?gene=BATF3
INHBE	Inhibin Subunit Beta E	Protein Coding	37	GC12P057452	0.562514	https://www.genecards.org/cgi-bin/carddisp.pl?gene=INHBE
MRGPRX1	MAS Related GPR Family Member X1	Protein Coding	37	GC11M018955	0.562514	https://www.genecards.org/cgi-bin/carddisp.pl?gene=MRGPRX1
MAFK	MAF BZIP Transcription Factor K	Protein Coding	37	GC07P001531	0.562514	https://www.genecards.org/cgi-bin/carddisp.pl?gene=MAFK
CEBPG	CCAAT Enhancer Binding Protein Gamma	Protein Coding	36	GC19P033373	0.562514	https://www.genecards.org/cgi-bin/carddisp.pl?gene=CEBPG
INHBC	Inhibin Subunit Beta C	Protein Coding	36	GC12P057434	0.562514	https://www.genecards.org/cgi-bin/carddisp.pl?gene=INHBC
COP1	COP1 E3 Ubiquitin Ligase	Protein Coding	33	GC01M175944	0.562514	https://www.genecards.org/cgi-bin/carddisp.pl?gene=COP1
MIR541	MicroRNA 541	RNA Gene	17	GC14P107297	0.562514	https://www.genecards.org/cgi-bin/carddisp.pl?gene=MIR541
ARX	Aristaless Related Homeobox	Protein Coding	42	GC0XM025003	0.539623	https://www.genecards.org/cgi-bin/carddisp.pl?gene=ARX
PSMB1	Proteasome 20S Subunit Beta 1	Protein Coding	44	GC06M170535	0.539433	https://www.genecards.org/cgi-bin/carddisp.pl?gene=PSMB1
UCHL5	Ubiquitin C-Terminal Hydrolase L5	Protein Coding	41	GC01M193012	0.539433	https://www.genecards.org/cgi-bin/carddisp.pl?gene=UCHL5
UBE2O	Ubiquitin Conjugating Enzyme E2 O	Protein Coding	40	GC17M076389	0.539433	https://www.genecards.org/cgi-bin/carddisp.pl?gene=UBE2O
TBL3	Transducin Beta Like 3	Protein Coding	38	GC16P006804	0.539433	https://www.genecards.org/cgi-bin/carddisp.pl?gene=TBL3
COPS6	COP9 Signalosome Subunit 6	Protein Coding	37	GC07P100088	0.539433	https://www.genecards.org/cgi-bin/carddisp.pl?gene=COPS6
ZNF44	Zinc Finger Protein 44	Protein Coding	37	GC19M012224	0.539433	https://www.genecards.org/cgi-bin/carddisp.pl?gene=ZNF44
ZNF207	Zinc Finger Protein 207	Protein Coding	36	GC17P032371	0.539433	https://www.genecards.org/cgi-bin/carddisp.pl?gene=ZNF207
ZNF174	Zinc Finger Protein 174	Protein Coding	34	GC16P003401	0.539433	https://www.genecards.org/cgi-bin/carddisp.pl?gene=ZNF174
USP38	Ubiquitin Specific Peptidase 38	Protein Coding	34	GC04P143184	0.539433	https://www.genecards.org/cgi-bin/carddisp.pl?gene=USP38
ASCL1	Achaete-Scute Family BHLH Transcription Factor 1	Protein Coding	44	GC12P102957	0.537609	https://www.genecards.org/cgi-bin/carddisp.pl?gene=ASCL1
PPP3CA	Protein Phosphatase 3 Catalytic Subunit Alpha	Protein Coding	52	GC04M101024	0.525971	https://www.genecards.org/cgi-bin/carddisp.pl?gene=PPP3CA
TCF7L2	Transcription Factor 7 Like 2	Protein Coding	45	GC10P112950	0.512601	https://www.genecards.org/cgi-bin/carddisp.pl?gene=TCF7L2
MMP1	Matrix Metallopeptidase 1	Protein Coding	50	GC11M102810	0.497975	https://www.genecards.org/cgi-bin/carddisp.pl?gene=MMP1
FGFR2	Fibroblast Growth Factor Receptor 2	Protein Coding	52	GC10M121478	0.494133	https://www.genecards.org/cgi-bin/carddisp.pl?gene=FGFR2
TRPV4	Transient Receptor Potential Cation Channel Subfamily V Member 4	Protein Coding	49	GC12M109783	0.494133	https://www.genecards.org/cgi-bin/carddisp.pl?gene=TRPV4
VPS35	VPS35 Retromer Complex Component	Protein Coding	43	GC16M046805	0.494133	https://www.genecards.org/cgi-bin/carddisp.pl?gene=VPS35
TRIP13	Thyroid Hormone Receptor Interactor 13	Protein Coding	40	GC05P000892	0.494133	https://www.genecards.org/cgi-bin/carddisp.pl?gene=TRIP13
MYO9A	Myosin IXA	Protein Coding	38	GC15M071822	0.494133	https://www.genecards.org/cgi-bin/carddisp.pl?gene=MYO9A
CALB2	Calbindin 2	Protein Coding	40	GC16P071392	0.486586	https://www.genecards.org/cgi-bin/carddisp.pl?gene=CALB2
DUSP19	Dual Specificity Phosphatase 19	Protein Coding	37	GC02P183078	0.486586	https://www.genecards.org/cgi-bin/carddisp.pl?gene=DUSP19
GNRHR	Gonadotropin Releasing Hormone Receptor	Protein Coding	46	GC04M067737	0.477979	https://www.genecards.org/cgi-bin/carddisp.pl?gene=GNRHR
DCAF8	DDB1 And CUL4 Associated Factor 8	Protein Coding	37	GC01M160215	0.469124	https://www.genecards.org/cgi-bin/carddisp.pl?gene=DCAF8
NCOR2	Nuclear Receptor Corepressor 2	Protein Coding	44	GC12M124324	0.467178	https://www.genecards.org/cgi-bin/carddisp.pl?gene=NCOR2
ERBB2	Erb-B2 Receptor Tyrosine Kinase 2	Protein Coding	52	GC17P039687	0.457551	https://www.genecards.org/cgi-bin/carddisp.pl?gene=ERBB2
ADK	Adenosine Kinase	Protein Coding	49	GC10P074152	0.457551	https://www.genecards.org/cgi-bin/carddisp.pl?gene=ADK
NR1H4	Nuclear Receptor Subfamily 1 Group H Member 4	Protein Coding	48	GC12P100473	0.457551	https://www.genecards.org/cgi-bin/carddisp.pl?gene=NR1H4
TBXA2R	Thromboxane A2 Receptor	Protein Coding	48	GC19M003594	0.457551	https://www.genecards.org/cgi-bin/carddisp.pl?gene=TBXA2R
AVPR2	Arginine Vasopressin Receptor 2	Protein Coding	47	GC0XP153902	0.457551	https://www.genecards.org/cgi-bin/carddisp.pl?gene=AVPR2
GLDC	Glycine Decarboxylase	Protein Coding	47	GC09M006522	0.457551	https://www.genecards.org/cgi-bin/carddisp.pl?gene=GLDC
PLK4	Polo Like Kinase 4	Protein Coding	47	GC04P127880	0.457551	https://www.genecards.org/cgi-bin/carddisp.pl?gene=PLK4
BACE1	Beta-Secretase 1	Protein Coding	46	GC11M117285	0.457551	https://www.genecards.org/cgi-bin/carddisp.pl?gene=BACE1
SPRY2	Sprouty RTK Signaling Antagonist 2	Protein Coding	46	GC13M080335	0.457551	https://www.genecards.org/cgi-bin/carddisp.pl?gene=SPRY2
ACACB	Acetyl-CoA Carboxylase Beta	Protein Coding	45	GC12P109116	0.457551	https://www.genecards.org/cgi-bin/carddisp.pl?gene=ACACB
BIRC5	Baculoviral IAP Repeat Containing 5	Protein Coding	45	GC17P078214	0.457551	https://www.genecards.org/cgi-bin/carddisp.pl?gene=BIRC5
AQP5	Aquaporin 5	Protein Coding	45	GC12P049961	0.457551	https://www.genecards.org/cgi-bin/carddisp.pl?gene=AQP5
ELANE	Elastase, Neutrophil Expressed	Protein Coding	45	GC19P000889	0.457551	https://www.genecards.org/cgi-bin/carddisp.pl?gene=ELANE
PAFAH1B1	Platelet Activating Factor Acetylhydrolase 1b Regulatory Subunit 1	Protein Coding	45	GC17P002593	0.457551	https://www.genecards.org/cgi-bin/carddisp.pl?gene=PAFAH1B1
NR5A2	Nuclear Receptor Subfamily 5 Group A Member 2	Protein Coding	45	GC01P199996	0.457551	https://www.genecards.org/cgi-bin/carddisp.pl?gene=NR5A2
LPAR1	Lysophosphatidic Acid Receptor 1	Protein Coding	45	GC09M110873	0.457551	https://www.genecards.org/cgi-bin/carddisp.pl?gene=LPAR1
PDK4	Pyruvate Dehydrogenase Kinase 4	Protein Coding	45	GC07M095583	0.457551	https://www.genecards.org/cgi-bin/carddisp.pl?gene=PDK4
SLC16A2	Solute Carrier Family 16 Member 2	Protein Coding	45	GC0XP074450	0.457551	https://www.genecards.org/cgi-bin/carddisp.pl?gene=SLC16A2
AFP	Alpha Fetoprotein	Protein Coding	44	GC04P073431	0.457551	https://www.genecards.org/cgi-bin/carddisp.pl?gene=AFP
ANG	Angiogenin	Protein Coding	44	GC14P027326	0.457551	https://www.genecards.org/cgi-bin/carddisp.pl?gene=ANG
ADD1	Adducin 1	Protein Coding	44	GC04P002855	0.457551	https://www.genecards.org/cgi-bin/carddisp.pl?gene=ADD1
ADH7	Alcohol Dehydrogenase 7 (Class IV), Mu Or Sigma Polypeptide	Protein Coding	44	GC04M099412	0.457551	https://www.genecards.org/cgi-bin/carddisp.pl?gene=ADH7
HLA-G	Major Histocompatibility Complex, Class I, G	Protein Coding	44	GC06P061122	0.457551	https://www.genecards.org/cgi-bin/carddisp.pl?gene=HLA-G
MKI67	Marker Of Proliferation Ki-67	Protein Coding	44	GC10M128096	0.457551	https://www.genecards.org/cgi-bin/carddisp.pl?gene=MKI67
PIGA	Phosphatidylinositol Glycan Anchor Biosynthesis Class A	Protein Coding	44	GC0XM015319	0.457551	https://www.genecards.org/cgi-bin/carddisp.pl?gene=PIGA
TGFA	Transforming Growth Factor Alpha	Protein Coding	44	GC02M070447	0.457551	https://www.genecards.org/cgi-bin/carddisp.pl?gene=TGFA
SLC6A19	Solute Carrier Family 6 Member 19	Protein Coding	44	GC05P001201	0.457551	https://www.genecards.org/cgi-bin/carddisp.pl?gene=SLC6A19
SI	Sucrase-Isomaltase	Protein Coding	43	GC03M164978	0.457551	https://www.genecards.org/cgi-bin/carddisp.pl?gene=SI
RBP4	Retinol Binding Protein 4	Protein Coding	43	GC10M093591	0.457551	https://www.genecards.org/cgi-bin/carddisp.pl?gene=RBP4
CXCL1	C-X-C Motif Chemokine Ligand 1	Protein Coding	42	GC04P073869	0.457551	https://www.genecards.org/cgi-bin/carddisp.pl?gene=CXCL1
FBP2	Fructose-Bisphosphatase 2	Protein Coding	42	GC09M094558	0.457551	https://www.genecards.org/cgi-bin/carddisp.pl?gene=FBP2
DDAH1	Dimethylarginine Dimethylaminohydrolase 1	Protein Coding	42	GC01M085318	0.457551	https://www.genecards.org/cgi-bin/carddisp.pl?gene=DDAH1
GRK4	G Protein-Coupled Receptor Kinase 4	Protein Coding	42	GC04P002963	0.457551	https://www.genecards.org/cgi-bin/carddisp.pl?gene=GRK4
MAP1LC3A	Microtubule Associated Protein 1 Light Chain 3 Alpha	Protein Coding	42	GC20P034546	0.457551	https://www.genecards.org/cgi-bin/carddisp.pl?gene=MAP1LC3A
ARR3	Arrestin 3	Protein Coding	41	GC0XP070269	0.457551	https://www.genecards.org/cgi-bin/carddisp.pl?gene=ARR3
IL18R1	Interleukin 18 Receptor 1	Protein Coding	41	GC02P102311	0.457551	https://www.genecards.org/cgi-bin/carddisp.pl?gene=IL18R1
EXOSC2	Exosome Component 2	Protein Coding	41	GC09P130693	0.457551	https://www.genecards.org/cgi-bin/carddisp.pl?gene=EXOSC2
EXOSC3	Exosome Component 3	Protein Coding	41	GC09M037772	0.457551	https://www.genecards.org/cgi-bin/carddisp.pl?gene=EXOSC3
HPGDS	Hematopoietic Prostaglandin D Synthase	Protein Coding	41	GC04M094298	0.457551	https://www.genecards.org/cgi-bin/carddisp.pl?gene=HPGDS
ME1	Malic Enzyme 1	Protein Coding	41	GC06M083210	0.457551	https://www.genecards.org/cgi-bin/carddisp.pl?gene=ME1
MIP	Major Intrinsic Protein Of Lens Fiber	Protein Coding	41	GC12M056449	0.457551	https://www.genecards.org/cgi-bin/carddisp.pl?gene=MIP
SMN2	Survival Of Motor Neuron 2, Centromeric	Protein Coding	41	GC05P070049	0.457551	https://www.genecards.org/cgi-bin/carddisp.pl?gene=SMN2
SLC2A6	Solute Carrier Family 2 Member 6	Protein Coding	41	GC09M133471	0.457551	https://www.genecards.org/cgi-bin/carddisp.pl?gene=SLC2A6
S100A6	S100 Calcium Binding Protein A6	Protein Coding	41	GC01M153535	0.457551	https://www.genecards.org/cgi-bin/carddisp.pl?gene=S100A6
DIO1	Iodothyronine Deiodinase 1	Protein Coding	40	GC01P053891	0.457551	https://www.genecards.org/cgi-bin/carddisp.pl?gene=DIO1
CMKLR1	Chemerin Chemokine-Like Receptor 1	Protein Coding	40	GC12M108288	0.457551	https://www.genecards.org/cgi-bin/carddisp.pl?gene=CMKLR1
IL11	Interleukin 11	Protein Coding	40	GC19M055364	0.457551	https://www.genecards.org/cgi-bin/carddisp.pl?gene=IL11
CXCL5	C-X-C Motif Chemokine Ligand 5	Protein Coding	40	GC04M073995	0.457551	https://www.genecards.org/cgi-bin/carddisp.pl?gene=CXCL5
PTGER1	Prostaglandin E Receptor 1	Protein Coding	40	GC19M014444	0.457551	https://www.genecards.org/cgi-bin/carddisp.pl?gene=PTGER1
S100A1	S100 Calcium Binding Protein A1	Protein Coding	40	GC01P153627	0.457551	https://www.genecards.org/cgi-bin/carddisp.pl?gene=S100A1
AOC1	Amine Oxidase Copper Containing 1	Protein Coding	39	GC07P150824	0.457551	https://www.genecards.org/cgi-bin/carddisp.pl?gene=AOC1
OSBP	Oxysterol Binding Protein	Protein Coding	39	GC11M074195	0.457551	https://www.genecards.org/cgi-bin/carddisp.pl?gene=OSBP
GPBAR1	G Protein-Coupled Bile Acid Receptor 1	Protein Coding	38	GC02P218259	0.457551	https://www.genecards.org/cgi-bin/carddisp.pl?gene=GPBAR1
TNRC6A	Trinucleotide Repeat Containing Adaptor 6A	Protein Coding	38	GC16P024611	0.457551	https://www.genecards.org/cgi-bin/carddisp.pl?gene=TNRC6A
EXOSC5	Exosome Component 5	Protein Coding	37	GC19M051172	0.457551	https://www.genecards.org/cgi-bin/carddisp.pl?gene=EXOSC5
CSN2	Casein Beta	Protein Coding	35	GC04M069955	0.457551	https://www.genecards.org/cgi-bin/carddisp.pl?gene=CSN2
GNRH2	Gonadotropin Releasing Hormone 2	Protein Coding	34	GC20P003450	0.457551	https://www.genecards.org/cgi-bin/carddisp.pl?gene=GNRH2
MREG	Melanoregulin	Protein Coding	33	GC02M215957	0.457551	https://www.genecards.org/cgi-bin/carddisp.pl?gene=MREG
RABEP2	Rabaptin, RAB GTPase Binding Effector Protein 2	Protein Coding	33	GC16M032009	0.457551	https://www.genecards.org/cgi-bin/carddisp.pl?gene=RABEP2
TBXT	T-Box Transcription Factor T	Protein Coding	33	GC06M166158	0.457551	https://www.genecards.org/cgi-bin/carddisp.pl?gene=TBXT
LSM12	LSM12 Homolog	Protein Coding	32	GC17M044034	0.457551	https://www.genecards.org/cgi-bin/carddisp.pl?gene=LSM12
AMY1C	Amylase Alpha 1C	Protein Coding	30	GC01P103745	0.457551	https://www.genecards.org/cgi-bin/carddisp.pl?gene=AMY1C
AMY1B	Amylase Alpha 1B	Protein Coding	29	GC01M103687	0.457551	https://www.genecards.org/cgi-bin/carddisp.pl?gene=AMY1B
KIAA1549L	KIAA1549 Like	Protein Coding	28	GC11P033377	0.457551	https://www.genecards.org/cgi-bin/carddisp.pl?gene=KIAA1549L
NBPF14	NBPF Member 14	Protein Coding	23	GC01M148531	0.457551	https://www.genecards.org/cgi-bin/carddisp.pl?gene=NBPF14
MIR16-2	MicroRNA 16-2	RNA Gene	18	GC03P160413	0.457551	https://www.genecards.org/cgi-bin/carddisp.pl?gene=MIR16-2
LOC110596866	CYP7A1 5' Regulatory Region	Biological Region	1	GC08P058498	0.457551	https://www.genecards.org/cgi-bin/carddisp.pl?gene=LOC110596866
HCN2	Hyperpolarization Activated Cyclic Nucleotide Gated Potassium And Sodium Channel 2	Protein Coding	45	GC19P000589	0.453331	https://www.genecards.org/cgi-bin/carddisp.pl?gene=HCN2
ADORA2B	Adenosine A2b Receptor	Protein Coding	46	GC17P015927	0.434471	https://www.genecards.org/cgi-bin/carddisp.pl?gene=ADORA2B
TXK	TXK Tyrosine Kinase	Protein Coding	45	GC04M048082	0.434471	https://www.genecards.org/cgi-bin/carddisp.pl?gene=TXK
PTPRS	Protein Tyrosine Phosphatase Receptor Type S	Protein Coding	44	GC19M005157	0.434471	https://www.genecards.org/cgi-bin/carddisp.pl?gene=PTPRS
KMT2D	Lysine Methyltransferase 2D	Protein Coding	41	GC12M049018	0.434471	https://www.genecards.org/cgi-bin/carddisp.pl?gene=KMT2D
ENHO	Energy Homeostasis Associated	Protein Coding	29	GC09M034516	0.434471	https://www.genecards.org/cgi-bin/carddisp.pl?gene=ENHO
NMBR	Neuromedin B Receptor	Protein Coding	42	GC06M142059	0.419999	https://www.genecards.org/cgi-bin/carddisp.pl?gene=NMBR
PAX6	Paired Box 6	Protein Coding	47	GC11M031784	0.416632	https://www.genecards.org/cgi-bin/carddisp.pl?gene=PAX6
CUL3	Cullin 3	Protein Coding	46	GC02M224470	0.416632	https://www.genecards.org/cgi-bin/carddisp.pl?gene=CUL3
CCL5	C-C Motif Chemokine Ligand 5	Protein Coding	42	GC17M035871	0.405649	https://www.genecards.org/cgi-bin/carddisp.pl?gene=CCL5
CCL11	C-C Motif Chemokine Ligand 11	Protein Coding	42	GC17P034285	0.405649	https://www.genecards.org/cgi-bin/carddisp.pl?gene=CCL11
CLSPN	Claspin	Protein Coding	39	GC01M035720	0.405649	https://www.genecards.org/cgi-bin/carddisp.pl?gene=CLSPN
CDH13	Cadherin 13	Protein Coding	42	GC16P082626	0.391874	https://www.genecards.org/cgi-bin/carddisp.pl?gene=CDH13
NEFH	Neurofilament Heavy Chain	Protein Coding	45	GC22P029480	0.389096	https://www.genecards.org/cgi-bin/carddisp.pl?gene=NEFH
SIM1	SIM BHLH Transcription Factor 1	Protein Coding	40	GC06M100386	0.389096	https://www.genecards.org/cgi-bin/carddisp.pl?gene=SIM1
AVPR1B	Arginine Vasopressin Receptor 1B	Protein Coding	43	GC01M206109	0.383309	https://www.genecards.org/cgi-bin/carddisp.pl?gene=AVPR1B
SP1	Sp1 Transcription Factor	Protein Coding	44	GC12P053380	0.363729	https://www.genecards.org/cgi-bin/carddisp.pl?gene=SP1
NPY4R	Neuropeptide Y Receptor Y4	Protein Coding	38	GC10M046461	0.363729	https://www.genecards.org/cgi-bin/carddisp.pl?gene=NPY4R
NALF1	NALCN Channel Auxiliary Factor 1	Protein Coding	24	GC13M107164	0.363729	https://www.genecards.org/cgi-bin/carddisp.pl?gene=NALF1
PDE2A	Phosphodiesterase 2A	Protein Coding	46	GC11M072576	0.362249	https://www.genecards.org/cgi-bin/carddisp.pl?gene=PDE2A
CS	Citrate Synthase	Protein Coding	44	GC12M056271	0.358513	https://www.genecards.org/cgi-bin/carddisp.pl?gene=CS
RAC1	Rac Family Small GTPase 1	Protein Coding	48	GC07P006377	0.339832	https://www.genecards.org/cgi-bin/carddisp.pl?gene=RAC1
ENO2	Enolase 2	Protein Coding	46	GC12P006913	0.339832	https://www.genecards.org/cgi-bin/carddisp.pl?gene=ENO2
SLC30A1	Solute Carrier Family 30 Member 1	Protein Coding	40	GC01M211571	0.339832	https://www.genecards.org/cgi-bin/carddisp.pl?gene=SLC30A1
SENP1	SUMO Specific Peptidase 1	Protein Coding	42	GC12M048042	0.33974	https://www.genecards.org/cgi-bin/carddisp.pl?gene=SENP1
CTBP2	C-Terminal Binding Protein 2	Protein Coding	44	GC10M124984	0.338042	https://www.genecards.org/cgi-bin/carddisp.pl?gene=CTBP2
TAC3	Tachykinin Precursor 3	Protein Coding	44	GC12M057009	0.330345	https://www.genecards.org/cgi-bin/carddisp.pl?gene=TAC3
CHML	CHM Like Rab Escort Protein	Protein Coding	37	GC01M241628	0.330345	https://www.genecards.org/cgi-bin/carddisp.pl?gene=CHML
CDK2	Cyclin Dependent Kinase 2	Protein Coding	50	GC12P055966	0.296984	https://www.genecards.org/cgi-bin/carddisp.pl?gene=CDK2
CYP1B1	Cytochrome P450 Family 1 Subfamily B Member 1	Protein Coding	48	GC02M038066	0.296984	https://www.genecards.org/cgi-bin/carddisp.pl?gene=CYP1B1
OPRD1	Opioid Receptor Delta 1	Protein Coding	44	GC01P028812	0.296984	https://www.genecards.org/cgi-bin/carddisp.pl?gene=OPRD1
PNMT	Phenylethanolamine N-Methyltransferase	Protein Coding	44	GC17P039667	0.296984	https://www.genecards.org/cgi-bin/carddisp.pl?gene=PNMT
TAP2	Transporter 2, ATP Binding Cassette Subfamily B Member	Protein Coding	44	GC06M032821	0.296984	https://www.genecards.org/cgi-bin/carddisp.pl?gene=TAP2
NFATC2	Nuclear Factor Of Activated T Cells 2	Protein Coding	43	GC20M051386	0.296984	https://www.genecards.org/cgi-bin/carddisp.pl?gene=NFATC2
ALG1	ALG1 Chitobiosyldiphosphodolichol Beta-Mannosyltransferase	Protein Coding	42	GC16P005033	0.296984	https://www.genecards.org/cgi-bin/carddisp.pl?gene=ALG1
EIF3F	Eukaryotic Translation Initiation Factor 3 Subunit F	Protein Coding	42	GC11P007966	0.296984	https://www.genecards.org/cgi-bin/carddisp.pl?gene=EIF3F
ADAP1	ArfGAP With Dual PH Domains 1	Protein Coding	38	GC07M000897	0.296984	https://www.genecards.org/cgi-bin/carddisp.pl?gene=ADAP1
PNOC	Prepronociceptin	Protein Coding	36	GC08P028316	0.296984	https://www.genecards.org/cgi-bin/carddisp.pl?gene=PNOC
SSX2IP	SSX Family Member 2 Interacting Protein	Protein Coding	36	GC01M084643	0.296984	https://www.genecards.org/cgi-bin/carddisp.pl?gene=SSX2IP
CORT	Cortistatin	Protein Coding	35	GC01P010449	0.296984	https://www.genecards.org/cgi-bin/carddisp.pl?gene=CORT
SLFN12L	Schlafen Family Member 12 Like	Protein Coding	33	GC17M035464	0.296984	https://www.genecards.org/cgi-bin/carddisp.pl?gene=SLFN12L
THRA	Thyroid Hormone Receptor Alpha	Protein Coding	48	GC17P040058	0.286892	https://www.genecards.org/cgi-bin/carddisp.pl?gene=THRA
SLC2A3	Solute Carrier Family 2 Member 3	Protein Coding	48	GC12M007919	0.286892	https://www.genecards.org/cgi-bin/carddisp.pl?gene=SLC2A3
GLYATL1	Glycine-N-Acyltransferase Like 1	Protein Coding	34	GC11P058906	0.286892	https://www.genecards.org/cgi-bin/carddisp.pl?gene=GLYATL1
TLR4	Toll Like Receptor 4	Protein Coding	50	GC09P117704	0.286837	https://www.genecards.org/cgi-bin/carddisp.pl?gene=TLR4
ARHGDIA	Rho GDP Dissociation Inhibitor Alpha	Protein Coding	46	GC17M081867	0.286837	https://www.genecards.org/cgi-bin/carddisp.pl?gene=ARHGDIA
S100G	S100 Calcium Binding Protein G	Protein Coding	34	GC0XP016668	0.286837	https://www.genecards.org/cgi-bin/carddisp.pl?gene=S100G
HMOX2	Heme Oxygenase 2	Protein Coding	46	GC16P004474	0.253507	https://www.genecards.org/cgi-bin/carddisp.pl?gene=HMOX2
ANXA6	Annexin A6	Protein Coding	41	GC05M151100	0.253507	https://www.genecards.org/cgi-bin/carddisp.pl?gene=ANXA6
RECK	Reversion Inducing Cysteine Rich Protein With Kazal Motifs	Protein Coding	40	GC09P036036	0.253507	https://www.genecards.org/cgi-bin/carddisp.pl?gene=RECK
SPARC	Secreted Protein Acidic And Cysteine Rich	Protein Coding	49	GC05M151661	0.253476	https://www.genecards.org/cgi-bin/carddisp.pl?gene=SPARC
ARF1	ADP Ribosylation Factor 1	Protein Coding	46	GC01P228082	0.253476	https://www.genecards.org/cgi-bin/carddisp.pl?gene=ARF1
UBE2I	Ubiquitin Conjugating Enzyme E2 I	Protein Coding	46	GC16P006745	0.253476	https://www.genecards.org/cgi-bin/carddisp.pl?gene=UBE2I
ADH4	Alcohol Dehydrogenase 4 (Class II), Pi Polypeptide	Protein Coding	44	GC04M099123	0.253476	https://www.genecards.org/cgi-bin/carddisp.pl?gene=ADH4
NEUROD1	Neuronal Differentiation 1	Protein Coding	44	GC02M181673	0.253476	https://www.genecards.org/cgi-bin/carddisp.pl?gene=NEUROD1
PLP1	Proteolipid Protein 1	Protein Coding	42	GC0XP103773	0.253476	https://www.genecards.org/cgi-bin/carddisp.pl?gene=PLP1
TRIB1	Tribbles Pseudokinase 1	Protein Coding	37	GC08P125430	0.253476	https://www.genecards.org/cgi-bin/carddisp.pl?gene=TRIB1
PLLP	Plasmolipin	Protein Coding	34	GC16M057290	0.253476	https://www.genecards.org/cgi-bin/carddisp.pl?gene=PLLP
HMOX1	Heme Oxygenase 1	Protein Coding	51	GC22P035380	0.209999	https://www.genecards.org/cgi-bin/carddisp.pl?gene=HMOX1
NEK2	NIMA Related Kinase 2	Protein Coding	50	GC01M211658	0.209999	https://www.genecards.org/cgi-bin/carddisp.pl?gene=NEK2
BMPR1A	Bone Morphogenetic Protein Receptor Type 1A	Protein Coding	49	GC10P086819	0.209999	https://www.genecards.org/cgi-bin/carddisp.pl?gene=BMPR1A
ALDOA	Aldolase, Fructose-Bisphosphate A	Protein Coding	48	GC16P030064	0.209999	https://www.genecards.org/cgi-bin/carddisp.pl?gene=ALDOA
CYP2C8	Cytochrome P450 Family 2 Subfamily C Member 8	Protein Coding	48	GC10M095038	0.209999	https://www.genecards.org/cgi-bin/carddisp.pl?gene=CYP2C8
HCK	HCK Proto-Oncogene, Src Family Tyrosine Kinase	Protein Coding	48	GC20P032052	0.209999	https://www.genecards.org/cgi-bin/carddisp.pl?gene=HCK
POLH	DNA Polymerase Eta	Protein Coding	48	GC06P043576	0.209999	https://www.genecards.org/cgi-bin/carddisp.pl?gene=POLH
MAP2K3	Mitogen-Activated Protein Kinase Kinase 3	Protein Coding	48	GC17P031545	0.209999	https://www.genecards.org/cgi-bin/carddisp.pl?gene=MAP2K3
YES1	YES Proto-Oncogene 1, Src Family Tyrosine Kinase	Protein Coding	48	GC18M000721	0.209999	https://www.genecards.org/cgi-bin/carddisp.pl?gene=YES1
HPRT1	Hypoxanthine Phosphoribosyltransferase 1	Protein Coding	47	GC0XP134460	0.209999	https://www.genecards.org/cgi-bin/carddisp.pl?gene=HPRT1
LIMK2	LIM Domain Kinase 2	Protein Coding	47	GC22P031212	0.209999	https://www.genecards.org/cgi-bin/carddisp.pl?gene=LIMK2
CYP1A1	Cytochrome P450 Family 1 Subfamily A Member 1	Protein Coding	46	GC15M074719	0.209999	https://www.genecards.org/cgi-bin/carddisp.pl?gene=CYP1A1
DDB2	Damage Specific DNA Binding Protein 2	Protein Coding	46	GC11P047237	0.209999	https://www.genecards.org/cgi-bin/carddisp.pl?gene=DDB2
BRD4	Bromodomain Containing 4	Protein Coding	46	GC19M015236	0.209999	https://www.genecards.org/cgi-bin/carddisp.pl?gene=BRD4
CLDN1	Claudin 1	Protein Coding	46	GC03M190305	0.209999	https://www.genecards.org/cgi-bin/carddisp.pl?gene=CLDN1
GLI1	GLI Family Zinc Finger 1	Protein Coding	46	GC12P057460	0.209999	https://www.genecards.org/cgi-bin/carddisp.pl?gene=GLI1
KDM1A	Lysine Demethylase 1A	Protein Coding	46	GC01P023019	0.209999	https://www.genecards.org/cgi-bin/carddisp.pl?gene=KDM1A
CDC34	Cell Division Cycle 34, Ubiqiutin Conjugating Enzyme	Protein Coding	46	GC19P000584	0.209999	https://www.genecards.org/cgi-bin/carddisp.pl?gene=CDC34
CDH11	Cadherin 11	Protein Coding	46	GC16M064943	0.209999	https://www.genecards.org/cgi-bin/carddisp.pl?gene=CDH11
MAP4K2	Mitogen-Activated Protein Kinase Kinase Kinase Kinase 2	Protein Coding	46	GC11M074423	0.209999	https://www.genecards.org/cgi-bin/carddisp.pl?gene=MAP4K2
RARG	Retinoic Acid Receptor Gamma	Protein Coding	46	GC12M053210	0.209999	https://www.genecards.org/cgi-bin/carddisp.pl?gene=RARG
MCL1	MCL1 Apoptosis Regulator, BCL2 Family Member	Protein Coding	46	GC01M150561	0.209999	https://www.genecards.org/cgi-bin/carddisp.pl?gene=MCL1
SETD2	SET Domain Containing 2, Histone Lysine Methyltransferase	Protein Coding	46	GC03M047033	0.209999	https://www.genecards.org/cgi-bin/carddisp.pl?gene=SETD2
SUCLA2	Succinate-CoA Ligase ADP-Forming Subunit Beta	Protein Coding	46	GC13M047745	0.209999	https://www.genecards.org/cgi-bin/carddisp.pl?gene=SUCLA2
CYP7B1	Cytochrome P450 Family 7 Subfamily B Member 1	Protein Coding	45	GC08M064587	0.209999	https://www.genecards.org/cgi-bin/carddisp.pl?gene=CYP7B1
BCKDK	Branched Chain Keto Acid Dehydrogenase Kinase	Protein Coding	45	GC16P034576	0.209999	https://www.genecards.org/cgi-bin/carddisp.pl?gene=BCKDK
CPS1	Carbamoyl-Phosphate Synthase 1	Protein Coding	45	GC02P210477	0.209999	https://www.genecards.org/cgi-bin/carddisp.pl?gene=CPS1
ATIC	5-Aminoimidazole-4-Carboxamide Ribonucleotide Formyltransferase/IMP Cyclohydrolase	Protein Coding	45	GC02P215311	0.209999	https://www.genecards.org/cgi-bin/carddisp.pl?gene=ATIC
EPS15	Epidermal Growth Factor Receptor Pathway Substrate 15	Protein Coding	45	GC01M051354	0.209999	https://www.genecards.org/cgi-bin/carddisp.pl?gene=EPS15
LATS1	Large Tumor Suppressor Kinase 1	Protein Coding	45	GC06M149658	0.209999	https://www.genecards.org/cgi-bin/carddisp.pl?gene=LATS1
KRT17	Keratin 17	Protein Coding	45	GC17M041619	0.209999	https://www.genecards.org/cgi-bin/carddisp.pl?gene=KRT17
IGF2R	Insulin Like Growth Factor 2 Receptor	Protein Coding	45	GC06P159969	0.209999	https://www.genecards.org/cgi-bin/carddisp.pl?gene=IGF2R
MATK	Megakaryocyte-Associated Tyrosine Kinase	Protein Coding	45	GC19M003777	0.209999	https://www.genecards.org/cgi-bin/carddisp.pl?gene=MATK
MYCN	MYCN Proto-Oncogene, BHLH Transcription Factor	Protein Coding	45	GC02P015949	0.209999	https://www.genecards.org/cgi-bin/carddisp.pl?gene=MYCN
POLA1	DNA Polymerase Alpha 1, Catalytic Subunit	Protein Coding	45	GC0XP024693	0.209999	https://www.genecards.org/cgi-bin/carddisp.pl?gene=POLA1
PKN1	Protein Kinase N1	Protein Coding	45	GC19P014433	0.209999	https://www.genecards.org/cgi-bin/carddisp.pl?gene=PKN1
PDK1	Pyruvate Dehydrogenase Kinase 1	Protein Coding	45	GC02P172555	0.209999	https://www.genecards.org/cgi-bin/carddisp.pl?gene=PDK1
VIPR1	Vasoactive Intestinal Peptide Receptor 1	Protein Coding	45	GC03P042490	0.209999	https://www.genecards.org/cgi-bin/carddisp.pl?gene=VIPR1
BCL2L11	BCL2 Like 11	Protein Coding	44	GC02P111119	0.209999	https://www.genecards.org/cgi-bin/carddisp.pl?gene=BCL2L11
CHD4	Chromodomain Helicase DNA Binding Protein 4	Protein Coding	44	GC12M006570	0.209999	https://www.genecards.org/cgi-bin/carddisp.pl?gene=CHD4
CTPS1	CTP Synthase 1	Protein Coding	44	GC01P040979	0.209999	https://www.genecards.org/cgi-bin/carddisp.pl?gene=CTPS1
CCR1	C-C Motif Chemokine Receptor 1	Protein Coding	44	GC03M046218	0.209999	https://www.genecards.org/cgi-bin/carddisp.pl?gene=CCR1
CPE	Carboxypeptidase E	Protein Coding	44	GC04P165361	0.209999	https://www.genecards.org/cgi-bin/carddisp.pl?gene=CPE
FDXR	Ferredoxin Reductase	Protein Coding	44	GC17M074862	0.209999	https://www.genecards.org/cgi-bin/carddisp.pl?gene=FDXR
CDC7	Cell Division Cycle 7	Protein Coding	44	GC01P091500	0.209999	https://www.genecards.org/cgi-bin/carddisp.pl?gene=CDC7
GALNS	Galactosamine (N-Acetyl)-6-Sulfatase	Protein Coding	44	GC16M088813	0.209999	https://www.genecards.org/cgi-bin/carddisp.pl?gene=GALNS
PCBD1	Pterin-4 Alpha-Carbinolamine Dehydratase 1	Protein Coding	44	GC10M070882	0.209999	https://www.genecards.org/cgi-bin/carddisp.pl?gene=PCBD1
PAK6	P21 (RAC1) Activated Kinase 6	Protein Coding	44	GC15P040217	0.209999	https://www.genecards.org/cgi-bin/carddisp.pl?gene=PAK6
PDIA3	Protein Disulfide Isomerase Family A Member 3	Protein Coding	44	GC15P043746	0.209999	https://www.genecards.org/cgi-bin/carddisp.pl?gene=PDIA3
PI4KB	Phosphatidylinositol 4-Kinase Beta	Protein Coding	44	GC01M151291	0.209999	https://www.genecards.org/cgi-bin/carddisp.pl?gene=PI4KB
PTPRD	Protein Tyrosine Phosphatase Receptor Type D	Protein Coding	44	GC09M008307	0.209999	https://www.genecards.org/cgi-bin/carddisp.pl?gene=PTPRD
SLC12A4	Solute Carrier Family 12 Member 4	Protein Coding	44	GC16M067965	0.209999	https://www.genecards.org/cgi-bin/carddisp.pl?gene=SLC12A4
SEMA4A	Semaphorin 4A	Protein Coding	44	GC01P156147	0.209999	https://www.genecards.org/cgi-bin/carddisp.pl?gene=SEMA4A
PGRMC1	Progesterone Receptor Membrane Component 1	Protein Coding	44	GC0XP119236	0.209999	https://www.genecards.org/cgi-bin/carddisp.pl?gene=PGRMC1
VAPB	VAMP Associated Protein B And C	Protein Coding	44	GC20P058389	0.209999	https://www.genecards.org/cgi-bin/carddisp.pl?gene=VAPB
DDX41	DEAD-Box Helicase 41	Protein Coding	43	GC05M177511	0.209999	https://www.genecards.org/cgi-bin/carddisp.pl?gene=DDX41
ABCG1	ATP Binding Cassette Subfamily G Member 1	Protein Coding	43	GC21P042199	0.209999	https://www.genecards.org/cgi-bin/carddisp.pl?gene=ABCG1
ARHGAP1	Rho GTPase Activating Protein 1	Protein Coding	43	GC11M073822	0.209999	https://www.genecards.org/cgi-bin/carddisp.pl?gene=ARHGAP1
AP1B1	Adaptor Related Protein Complex 1 Subunit Beta 1	Protein Coding	43	GC22M029327	0.209999	https://www.genecards.org/cgi-bin/carddisp.pl?gene=AP1B1
ENPP2	Ectonucleotide Pyrophosphatase/Phosphodiesterase 2	Protein Coding	43	GC08M119556	0.209999	https://www.genecards.org/cgi-bin/carddisp.pl?gene=ENPP2
TACC3	Transforming Acidic Coiled-Coil Containing Protein 3	Protein Coding	43	GC04P001723	0.209999	https://www.genecards.org/cgi-bin/carddisp.pl?gene=TACC3
PTPN13	Protein Tyrosine Phosphatase Non-Receptor Type 13	Protein Coding	43	GC04P086594	0.209999	https://www.genecards.org/cgi-bin/carddisp.pl?gene=PTPN13
SDC4	Syndecan 4	Protein Coding	43	GC20M045325	0.209999	https://www.genecards.org/cgi-bin/carddisp.pl?gene=SDC4
SLC2A5	Solute Carrier Family 2 Member 5	Protein Coding	43	GC01M009036	0.209999	https://www.genecards.org/cgi-bin/carddisp.pl?gene=SLC2A5
EBP	EBP Cholestenol Delta-Isomerase	Protein Coding	42	GC0XP048521	0.209999	https://www.genecards.org/cgi-bin/carddisp.pl?gene=EBP
BMP6	Bone Morphogenetic Protein 6	Protein Coding	42	GC06P007726	0.209999	https://www.genecards.org/cgi-bin/carddisp.pl?gene=BMP6
ATXN2	Ataxin 2	Protein Coding	42	GC12M111443	0.209999	https://www.genecards.org/cgi-bin/carddisp.pl?gene=ATXN2
CCNK	Cyclin K	Protein Coding	42	GC14P099483	0.209999	https://www.genecards.org/cgi-bin/carddisp.pl?gene=CCNK
COL9A2	Collagen Type IX Alpha 2 Chain	Protein Coding	42	GC01M040300	0.209999	https://www.genecards.org/cgi-bin/carddisp.pl?gene=COL9A2
GFPT2	Glutamine-Fructose-6-Phosphate Transaminase 2	Protein Coding	42	GC05M180300	0.209999	https://www.genecards.org/cgi-bin/carddisp.pl?gene=GFPT2
CRADD	CASP2 And RIPK1 Domain Containing Adaptor With Death Domain	Protein Coding	42	GC12P093677	0.209999	https://www.genecards.org/cgi-bin/carddisp.pl?gene=CRADD
CSF1	Colony Stimulating Factor 1	Protein Coding	42	GC01P109911	0.209999	https://www.genecards.org/cgi-bin/carddisp.pl?gene=CSF1
ESPL1	Extra Spindle Pole Bodies Like 1, Separase	Protein Coding	42	GC12P053268	0.209999	https://www.genecards.org/cgi-bin/carddisp.pl?gene=ESPL1
HDAC10	Histone Deacetylase 10	Protein Coding	42	GC22M050245	0.209999	https://www.genecards.org/cgi-bin/carddisp.pl?gene=HDAC10
GATAD2B	GATA Zinc Finger Domain Containing 2B	Protein Coding	42	GC01M153805	0.209999	https://www.genecards.org/cgi-bin/carddisp.pl?gene=GATAD2B
EFNA5	Ephrin A5	Protein Coding	42	GC05M107376	0.209999	https://www.genecards.org/cgi-bin/carddisp.pl?gene=EFNA5
PBK	PDZ Binding Kinase	Protein Coding	42	GC08M027809	0.209999	https://www.genecards.org/cgi-bin/carddisp.pl?gene=PBK
POLR2E	RNA Polymerase II, I And III Subunit E	Protein Coding	42	GC19M001086	0.209999	https://www.genecards.org/cgi-bin/carddisp.pl?gene=POLR2E
LPP	LIM Domain Containing Preferred Translocation Partner In Lipoma	Protein Coding	42	GC03P188153	0.209999	https://www.genecards.org/cgi-bin/carddisp.pl?gene=LPP
MAP3K13	Mitogen-Activated Protein Kinase Kinase Kinase 13	Protein Coding	42	GC03P185282	0.209999	https://www.genecards.org/cgi-bin/carddisp.pl?gene=MAP3K13
MYLK3	Myosin Light Chain Kinase 3	Protein Coding	42	GC16M046821	0.209999	https://www.genecards.org/cgi-bin/carddisp.pl?gene=MYLK3
RAB10	RAB10, Member RAS Oncogene Family	Protein Coding	42	GC02P026033	0.209999	https://www.genecards.org/cgi-bin/carddisp.pl?gene=RAB10
RAD23A	RAD23 Homolog A, Nucleotide Excision Repair Protein	Protein Coding	42	GC19P013035	0.209999	https://www.genecards.org/cgi-bin/carddisp.pl?gene=RAD23A
TIE1	Tyrosine Kinase With Immunoglobulin Like And EGF Like Domains 1	Protein Coding	42	GC01P043300	0.209999	https://www.genecards.org/cgi-bin/carddisp.pl?gene=TIE1
SULT1A2	Sulfotransferase Family 1A Member 2	Protein Coding	42	GC16M028591	0.209999	https://www.genecards.org/cgi-bin/carddisp.pl?gene=SULT1A2
UBQLN1	Ubiquilin 1	Protein Coding	42	GC09M083659	0.209999	https://www.genecards.org/cgi-bin/carddisp.pl?gene=UBQLN1
UBQLN2	Ubiquilin 2	Protein Coding	42	GC0XP056563	0.209999	https://www.genecards.org/cgi-bin/carddisp.pl?gene=UBQLN2
TRIM24	Tripartite Motif Containing 24	Protein Coding	42	GC07P138460	0.209999	https://www.genecards.org/cgi-bin/carddisp.pl?gene=TRIM24
SREBF2	Sterol Regulatory Element Binding Transcription Factor 2	Protein Coding	42	GC22P041833	0.209999	https://www.genecards.org/cgi-bin/carddisp.pl?gene=SREBF2
RNF2	Ring Finger Protein 2	Protein Coding	42	GC01P185045	0.209999	https://www.genecards.org/cgi-bin/carddisp.pl?gene=RNF2
SLIT1	Slit Guidance Ligand 1	Protein Coding	42	GC10M096998	0.209999	https://www.genecards.org/cgi-bin/carddisp.pl?gene=SLIT1
SETD7	SET Domain Containing 7, Histone Lysine Methyltransferase	Protein Coding	42	GC04M139495	0.209999	https://www.genecards.org/cgi-bin/carddisp.pl?gene=SETD7
CAMK1G	Calcium/Calmodulin Dependent Protein Kinase IG	Protein Coding	41	GC01P209583	0.209999	https://www.genecards.org/cgi-bin/carddisp.pl?gene=CAMK1G
CDH4	Cadherin 4	Protein Coding	41	GC20P061252	0.209999	https://www.genecards.org/cgi-bin/carddisp.pl?gene=CDH4
CLASP1	Cytoplasmic Linker Associated Protein 1	Protein Coding	41	GC02M121337	0.209999	https://www.genecards.org/cgi-bin/carddisp.pl?gene=CLASP1
CSNK1G3	Casein Kinase 1 Gamma 3	Protein Coding	41	GC05P123512	0.209999	https://www.genecards.org/cgi-bin/carddisp.pl?gene=CSNK1G3
ARFGEF2	ADP Ribosylation Factor Guanine Nucleotide Exchange Factor 2	Protein Coding	41	GC20P048921	0.209999	https://www.genecards.org/cgi-bin/carddisp.pl?gene=ARFGEF2
CUL7	Cullin 7	Protein Coding	41	GC06M043037	0.209999	https://www.genecards.org/cgi-bin/carddisp.pl?gene=CUL7
FANCI	FA Complementation Group I	Protein Coding	41	GC15P089243	0.209999	https://www.genecards.org/cgi-bin/carddisp.pl?gene=FANCI
HPS1	HPS1 Biogenesis Of Lysosomal Organelles Complex 3 Subunit 1	Protein Coding	41	GC10M098416	0.209999	https://www.genecards.org/cgi-bin/carddisp.pl?gene=HPS1
EIF3A	Eukaryotic Translation Initiation Factor 3 Subunit A	Protein Coding	41	GC10M119034	0.209999	https://www.genecards.org/cgi-bin/carddisp.pl?gene=EIF3A
NTF3	Neurotrophin 3	Protein Coding	41	GC12P005432	0.209999	https://www.genecards.org/cgi-bin/carddisp.pl?gene=NTF3
OTX1	Orthodenticle Homeobox 1	Protein Coding	41	GC02P063050	0.209999	https://www.genecards.org/cgi-bin/carddisp.pl?gene=OTX1
PGC	Progastricsin	Protein Coding	41	GC06M041736	0.209999	https://www.genecards.org/cgi-bin/carddisp.pl?gene=PGC
RASGRF1	Ras Protein Specific Guanine Nucleotide Releasing Factor 1	Protein Coding	41	GC15M078959	0.209999	https://www.genecards.org/cgi-bin/carddisp.pl?gene=RASGRF1
POLI	DNA Polymerase Iota	Protein Coding	41	GC18P054274	0.209999	https://www.genecards.org/cgi-bin/carddisp.pl?gene=POLI
PPM1G	Protein Phosphatase, Mg2+/Mn2+ Dependent 1G	Protein Coding	41	GC02M027424	0.209999	https://www.genecards.org/cgi-bin/carddisp.pl?gene=PPM1G
MACF1	Microtubule Actin Crosslinking Factor 1	Protein Coding	41	GC01P039082	0.209999	https://www.genecards.org/cgi-bin/carddisp.pl?gene=MACF1
SLC3A2	Solute Carrier Family 3 Member 2	Protein Coding	41	GC11P062856	0.209999	https://www.genecards.org/cgi-bin/carddisp.pl?gene=SLC3A2
[truncated: 204 more rows]
