# Supplementary material for: Relationship between circadian genes and memory impairment caused by sleep deprivation
Source: PeerJ. 2022 Mar 21;10:e13165. doi: 10.7717/peerj.13165 (PMC8944342; doi:10.7717/peerj.13165)
Supplement: Supplemental Information 5 [file peerj-10-13165-s005.xlsx]

## Sheet: GSE33302
!Series_title	Expression data from sleep deprivation experiment in mouse hippocampus
!Series_geo_accession	GSE33302
!Series_status	Public on Sep 06 2012
!Series_submission_date	Oct 27 2011
!Series_last_update_date	Feb 11 2019
!Series_pubmed_id	22930738
!Series_summary	We used microarrays to detail the global programme of gene expression underlying the effect of sleep deprivation in the mouse hippocampus and identified distinct classes of regulated genes during this process.
!Series_overall_design	Hippocampal tissue was taken from sleep deprived mice and time-matched non-sleep-deprived control animals that were left undisturbed in their home cages during the sleep deprivation period for a total of 8 and 9 replicates per group. RNA was isolated and cDNA was synthesized from hippocampal tissue, and the sample from each animal was hybridized to a separate Affymetrix Mouse 430_2 microarray
!Series_type	Expression profiling by array
!Series_contributor	Lucia,,Peixoto
!Series_contributor	Chris,,Vecsey
!Series_contributor	Ted,,Abel
!Series_sample_id	GSM824682 GSM824683 GSM824684 GSM824685 GSM824686 GSM824687 GSM824688 GSM824689 GSM824690 GSM824691 GSM824692 GSM824693 GSM824694 GSM824695 GSM824696 GSM824697 GSM824698
!Series_contact_name	Lucia,,Peixoto
!Series_contact_email	lucia.peixoto@wsu.edu
!Series_contact_department	College of Medical Sciences
!Series_contact_institute	Washington State University, Spokane
!Series_contact_address	PO Box 1495
!Series_contact_city	Spokane
!Series_contact_state	WA
!Series_contact_zip/postal_code	99224
!Series_contact_country	USA
!Series_supplementary_file	ftp://ftp.ncbi.nlm.nih.gov/geo/series/GSE33nnn/GSE33302/suppl/GSE33302_RAW.tar
!Series_platform_id	GPL1261
!Series_platform_taxid	10090
!Series_sample_taxid	10090
!Series_relation	BioProject: https://www.ncbi.nlm.nih.gov/bioproject/PRJNA149329
!Sample_title	non-sleep deprived mouse control,biological replicate 1	non-sleep deprived mouse control,biological replicate 2	non-sleep deprived mouse control,biological replicate 3	non-sleep deprived mouse control,biological replicate 4	non-sleep deprived mouse control,biological replicate 5	non-sleep deprived mouse control,biological replicate 6	non-sleep deprived mouse control,biological replicate 7	non-sleep deprived mouse control,biological replicate 8	non-sleep deprived mouse control,biological replicate 9	sleep deprived mouse,biological replicate 1	sleep deprived mouse,biological replicate 2	sleep deprived mouse,biological replicate 3	sleep deprived mouse,biological replicate 4	sleep deprived mouse,biological replicate 5	sleep deprived mouse,biological replicate 6	sleep deprived mouse,biological replicate 7	sleep deprived mouse,biological replicate 8
!Sample_geo_accession	GSM824682	GSM824683	GSM824684	GSM824685	GSM824686	GSM824687	GSM824688	GSM824689	GSM824690	GSM824691	GSM824692	GSM824693	GSM824694	GSM824695	GSM824696	GSM824697	GSM824698
!Sample_status	Public on Sep 06 2012	Public on Sep 06 2012	Public on Sep 06 2012	Public on Sep 06 2012	Public on Sep 06 2012	Public on Sep 06 2012	Public on Sep 06 2012	Public on Sep 06 2012	Public on Sep 06 2012	Public on Sep 06 2012	Public on Sep 06 2012	Public on Sep 06 2012	Public on Sep 06 2012	Public on Sep 06 2012	Public on Sep 06 2012	Public on Sep 06 2012	Public on Sep 06 2012
!Sample_submission_date	Oct 31 2011	Oct 31 2011	Oct 31 2011	Oct 31 2011	Oct 31 2011	Oct 31 2011	Oct 31 2011	Oct 31 2011	Oct 31 2011	Oct 31 2011	Oct 31 2011	Oct 31 2011	Oct 31 2011	Oct 31 2011	Oct 31 2011	Oct 31 2011	Oct 31 2011
!Sample_last_update_date	Sep 06 2012	Sep 06 2012	Sep 06 2012	Sep 06 2012	Sep 06 2012	Sep 06 2012	Sep 06 2012	Sep 06 2012	Sep 06 2012	Sep 06 2012	Sep 06 2012	Sep 06 2012	Sep 06 2012	Sep 06 2012	Sep 06 2012	Sep 06 2012	Sep 06 2012
!Sample_type	RNA	RNA	RNA	RNA	RNA	RNA	RNA	RNA	RNA	RNA	RNA	RNA	RNA	RNA	RNA	RNA	RNA
!Sample_channel_count	1	1	1	1	1	1	1	1	1	1	1	1	1	1	1	1	1
!Sample_source_name_ch1	Dissected hippocampus from mouse	Dissected hippocampus from mouse	Dissected hippocampus from mouse	Dissected hippocampus from mouse	Dissected hippocampus from mouse	Dissected hippocampus from mouse	Dissected hippocampus from mouse	Dissected hippocampus from mouse	Dissected hippocampus from mouse	Dissected hippocampus from mouse	Dissected hippocampus from mouse	Dissected hippocampus from mouse	Dissected hippocampus from mouse	Dissected hippocampus from mouse	Dissected hippocampus from mouse	Dissected hippocampus from mouse	Dissected hippocampus from mouse
!Sample_organism_ch1	Mus musculus	Mus musculus	Mus musculus	Mus musculus	Mus musculus	Mus musculus	Mus musculus	Mus musculus	Mus musculus	Mus musculus	Mus musculus	Mus musculus	Mus musculus	Mus musculus	Mus musculus	Mus musculus	Mus musculus
!Sample_characteristics_ch1	tissue: hippocampus	tissue: hippocampus	tissue: hippocampus	tissue: hippocampus	tissue: hippocampus	tissue: hippocampus	tissue: hippocampus	tissue: hippocampus	tissue: hippocampus	tissue: hippocampus	tissue: hippocampus	tissue: hippocampus	tissue: hippocampus	tissue: hippocampus	tissue: hippocampus	tissue: hippocampus	tissue: hippocampus
!Sample_characteristics_ch1	genotype: C57/BL6	genotype: C57/BL6	genotype: C57/BL6	genotype: C57/BL6	genotype: C57/BL6	genotype: C57/BL6	genotype: C57/BL6	genotype: C57/BL6	genotype: C57/BL6	genotype: C57/BL6	genotype: C57/BL6	genotype: C57/BL6	genotype: C57/BL6	genotype: C57/BL6	genotype: C57/BL6	genotype: C57/BL6	genotype: C57/BL6
!Sample_characteristics_ch1	age: 2 months	age: 2 months	age: 2 months	age: 2 months	age: 2 months	age: 2 months	age: 2 months	age: 2 months	age: 2 months	age: 2 months	age: 2 months	age: 2 months	age: 2 months	age: 2 months	age: 2 months	age: 2 months	age: 2 months
!Sample_characteristics_ch1	treatment: non-sleep deprived mouse	treatment: non-sleep deprived mouse	treatment: non-sleep deprived mouse	treatment: non-sleep deprived mouse	treatment: non-sleep deprived mouse	treatment: non-sleep deprived mouse	treatment: non-sleep deprived mouse	treatment: non-sleep deprived mouse	treatment: non-sleep deprived mouse	treatment: sleep deprived mouse	treatment: sleep deprived mouse	treatment: sleep deprived mouse	treatment: sleep deprived mouse	treatment: sleep deprived mouse	treatment: sleep deprived mouse	treatment: sleep deprived mouse	treatment: sleep deprived mouse
!Sample_treatment_protocol_ch1	Each animal was handled daily for 6 days prior to sleep deprivation. Starting at approximately ZT 0-5, mice were sleep-deprived (SD) in their home cages for 5 hours by gentle handling[38]. Non-sleep-deprived mice (NSD) were left undisturbed in their home cages.Hippocampal dissections were performed immediately following the behavioral treatment, and alternated between SD and NSD animals.	Each animal was handled daily for 6 days prior to sleep deprivation. Starting at approximately ZT 0-5, mice were sleep-deprived (SD) in their home cages for 5 hours by gentle handling[38]. Non-sleep-deprived mice (NSD) were left undisturbed in their home cages.Hippocampal dissections were performed immediately following the behavioral treatment, and alternated between SD and NSD animals.	Each animal was handled daily for 6 days prior to sleep deprivation. Starting at approximately ZT 0-5, mice were sleep-deprived (SD) in their home cages for 5 hours by gentle handling[38]. Non-sleep-deprived mice (NSD) were left undisturbed in their home cages.Hippocampal dissections were performed immediately following the behavioral treatment, and alternated between SD and NSD animals.	Each animal was handled daily for 6 days prior to sleep deprivation. Starting at approximately ZT 0-5, mice were sleep-deprived (SD) in their home cages for 5 hours by gentle handling[38]. Non-sleep-deprived mice (NSD) were left undisturbed in their home cages.Hippocampal dissections were performed immediately following the behavioral treatment, and alternated between SD and NSD animals.	Each animal was handled daily for 6 days prior to sleep deprivation. Starting at approximately ZT 0-5, mice were sleep-deprived (SD) in their home cages for 5 hours by gentle handling[38]. Non-sleep-deprived mice (NSD) were left undisturbed in their home cages.Hippocampal dissections were performed immediately following the behavioral treatment, and alternated between SD and NSD animals.	Each animal was handled daily for 6 days prior to sleep deprivation. Starting at approximately ZT 0-5, mice were sleep-deprived (SD) in their home cages for 5 hours by gentle handling[38]. Non-sleep-deprived mice (NSD) were left undisturbed in their home cages.Hippocampal dissections were performed immediately following the behavioral treatment, and alternated between SD and NSD animals.	Each animal was handled daily for 6 days prior to sleep deprivation. Starting at approximately ZT 0-5, mice were sleep-deprived (SD) in their home cages for 5 hours by gentle handling[38]. Non-sleep-deprived mice (NSD) were left undisturbed in their home cages.Hippocampal dissections were performed immediately following the behavioral treatment, and alternated between SD and NSD animals.	Each animal was handled daily for 6 days prior to sleep deprivation. Starting at approximately ZT 0-5, mice were sleep-deprived (SD) in their home cages for 5 hours by gentle handling[38]. Non-sleep-deprived mice (NSD) were left undisturbed in their home cages.Hippocampal dissections were performed immediately following the behavioral treatment, and alternated between SD and NSD animals.	Each animal was handled daily for 6 days prior to sleep deprivation. Starting at approximately ZT 0-5, mice were sleep-deprived (SD) in their home cages for 5 hours by gentle handling[38]. Non-sleep-deprived mice (NSD) were left undisturbed in their home cages.Hippocampal dissections were performed immediately following the behavioral treatment, and alternated between SD and NSD animals.	Each animal was handled daily for 6 days prior to sleep deprivation. Starting at approximately ZT 0-5, mice were sleep-deprived (SD) in their home cages for 5 hours by gentle handling[38]. Non-sleep-deprived mice (NSD) were left undisturbed in their home cages.Hippocampal dissections were performed immediately following the behavioral treatment, and alternated between SD and NSD animals.	Each animal was handled daily for 6 days prior to sleep deprivation. Starting at approximately ZT 0-5, mice were sleep-deprived (SD) in their home cages for 5 hours by gentle handling[38]. Non-sleep-deprived mice (NSD) were left undisturbed in their home cages.Hippocampal dissections were performed immediately following the behavioral treatment, and alternated between SD and NSD animals.	Each animal was handled daily for 6 days prior to sleep deprivation. Starting at approximately ZT 0-5, mice were sleep-deprived (SD) in their home cages for 5 hours by gentle handling[38]. Non-sleep-deprived mice (NSD) were left undisturbed in their home cages.Hippocampal dissections were performed immediately following the behavioral treatment, and alternated between SD and NSD animals.	Each animal was handled daily for 6 days prior to sleep deprivation. Starting at approximately ZT 0-5, mice were sleep-deprived (SD) in their home cages for 5 hours by gentle handling[38]. Non-sleep-deprived mice (NSD) were left undisturbed in their home cages.Hippocampal dissections were performed immediately following the behavioral treatment, and alternated between SD and NSD animals.	Each animal was handled daily for 6 days prior to sleep deprivation. Starting at approximately ZT 0-5, mice were sleep-deprived (SD) in their home cages for 5 hours by gentle handling[38]. Non-sleep-deprived mice (NSD) were left undisturbed in their home cages.Hippocampal dissections were performed immediately following the behavioral treatment, and alternated between SD and NSD animals.	Each animal was handled daily for 6 days prior to sleep deprivation. Starting at approximately ZT 0-5, mice were sleep-deprived (SD) in their home cages for 5 hours by gentle handling[38]. Non-sleep-deprived mice (NSD) were left undisturbed in their home cages.Hippocampal dissections were performed immediately following the behavioral treatment, and alternated between SD and NSD animals.	Each animal was handled daily for 6 days prior to sleep deprivation. Starting at approximately ZT 0-5, mice were sleep-deprived (SD) in their home cages for 5 hours by gentle handling[38]. Non-sleep-deprived mice (NSD) were left undisturbed in their home cages.Hippocampal dissections were performed immediately following the behavioral treatment, and alternated between SD and NSD animals.	Each animal was handled daily for 6 days prior to sleep deprivation. Starting at approximately ZT 0-5, mice were sleep-deprived (SD) in their home cages for 5 hours by gentle handling[38]. Non-sleep-deprived mice (NSD) were left undisturbed in their home cages.Hippocampal dissections were performed immediately following the behavioral treatment, and alternated between SD and NSD animals.
!Sample_growth_protocol_ch1	Subjects. C57BL/6J adult male mice (2 to 4 months of age) were housed individually on a 12 hr/12 hr light/dark schedule with lights on at 7 am (ZT 0). Food and water were available ad libitum throughout the experiment.	Subjects. C57BL/6J adult male mice (2 to 4 months of age) were housed individually on a 12 hr/12 hr light/dark schedule with lights on at 7 am (ZT 0). Food and water were available ad libitum throughout the experiment.	Subjects. C57BL/6J adult male mice (2 to 4 months of age) were housed individually on a 12 hr/12 hr light/dark schedule with lights on at 7 am (ZT 0). Food and water were available ad libitum throughout the experiment.	Subjects. C57BL/6J adult male mice (2 to 4 months of age) were housed individually on a 12 hr/12 hr light/dark schedule with lights on at 7 am (ZT 0). Food and water were available ad libitum throughout the experiment.	Subjects. C57BL/6J adult male mice (2 to 4 months of age) were housed individually on a 12 hr/12 hr light/dark schedule with lights on at 7 am (ZT 0). Food and water were available ad libitum throughout the experiment.	Subjects. C57BL/6J adult male mice (2 to 4 months of age) were housed individually on a 12 hr/12 hr light/dark schedule with lights on at 7 am (ZT 0). Food and water were available ad libitum throughout the experiment.	Subjects. C57BL/6J adult male mice (2 to 4 months of age) were housed individually on a 12 hr/12 hr light/dark schedule with lights on at 7 am (ZT 0). Food and water were available ad libitum throughout the experiment.	Subjects. C57BL/6J adult male mice (2 to 4 months of age) were housed individually on a 12 hr/12 hr light/dark schedule with lights on at 7 am (ZT 0). Food and water were available ad libitum throughout the experiment.	Subjects. C57BL/6J adult male mice (2 to 4 months of age) were housed individually on a 12 hr/12 hr light/dark schedule with lights on at 7 am (ZT 0). Food and water were available ad libitum throughout the experiment.	Subjects. C57BL/6J adult male mice (2 to 4 months of age) were housed individually on a 12 hr/12 hr light/dark schedule with lights on at 7 am (ZT 0). Food and water were available ad libitum throughout the experiment.	Subjects. C57BL/6J adult male mice (2 to 4 months of age) were housed individually on a 12 hr/12 hr light/dark schedule with lights on at 7 am (ZT 0). Food and water were available ad libitum throughout the experiment.	Subjects. C57BL/6J adult male mice (2 to 4 months of age) were housed individually on a 12 hr/12 hr light/dark schedule with lights on at 7 am (ZT 0). Food and water were available ad libitum throughout the experiment.	Subjects. C57BL/6J adult male mice (2 to 4 months of age) were housed individually on a 12 hr/12 hr light/dark schedule with lights on at 7 am (ZT 0). Food and water were available ad libitum throughout the experiment.	Subjects. C57BL/6J adult male mice (2 to 4 months of age) were housed individually on a 12 hr/12 hr light/dark schedule with lights on at 7 am (ZT 0). Food and water were available ad libitum throughout the experiment.	Subjects. C57BL/6J adult male mice (2 to 4 months of age) were housed individually on a 12 hr/12 hr light/dark schedule with lights on at 7 am (ZT 0). Food and water were available ad libitum throughout the experiment.	Subjects. C57BL/6J adult male mice (2 to 4 months of age) were housed individually on a 12 hr/12 hr light/dark schedule with lights on at 7 am (ZT 0). Food and water were available ad libitum throughout the experiment.	Subjects. C57BL/6J adult male mice (2 to 4 months of age) were housed individually on a 12 hr/12 hr light/dark schedule with lights on at 7 am (ZT 0). Food and water were available ad libitum throughout the experiment.
!Sample_molecule_ch1	total RNA	total RNA	total RNA	total RNA	total RNA	total RNA	total RNA	total RNA	total RNA	total RNA	total RNA	total RNA	total RNA	total RNA	total RNA	total RNA	total RNA
!Sample_extract_protocol_ch1	Samples were homogenized in TRIzol followed by phase separation with 1-bromo-3-chloropropane (BCP). An equal volume of 70% ethanol was added to the aqueous phase, which was then further purified using the RNeasy system according to manufacturer's protocol. The 50ul eluate was supplemented with 1ul SUPERase-In prior to concentration to 20uL by vacuum centrifugation	Samples were homogenized in TRIzol followed by phase separation with 1-bromo-3-chloropropane (BCP). An equal volume of 70% ethanol was added to the aqueous phase, which was then further purified using the RNeasy system according to manufacturer's protocol. The 50ul eluate was supplemented with 1ul SUPERase-In prior to concentration to 20uL by vacuum centrifugation	Samples were homogenized in TRIzol followed by phase separation with 1-bromo-3-chloropropane (BCP). An equal volume of 70% ethanol was added to the aqueous phase, which was then further purified using the RNeasy system according to manufacturer's protocol. The 50ul eluate was supplemented with 1ul SUPERase-In prior to concentration to 20uL by vacuum centrifugation	Samples were homogenized in TRIzol followed by phase separation with 1-bromo-3-chloropropane (BCP). An equal volume of 70% ethanol was added to the aqueous phase, which was then further purified using the RNeasy system according to manufacturer's protocol. The 50ul eluate was supplemented with 1ul SUPERase-In prior to concentration to 20uL by vacuum centrifugation	Samples were homogenized in TRIzol followed by phase separation with 1-bromo-3-chloropropane (BCP). An equal volume of 70% ethanol was added to the aqueous phase, which was then further purified using the RNeasy system according to manufacturer's protocol. The 50ul eluate was supplemented with 1ul SUPERase-In prior to concentration to 20uL by vacuum centrifugation	Samples were homogenized in TRIzol followed by phase separation with 1-bromo-3-chloropropane (BCP). An equal volume of 70% ethanol was added to the aqueous phase, which was then further purified using the RNeasy system according to manufacturer's protocol. The 50ul eluate was supplemented with 1ul SUPERase-In prior to concentration to 20uL by vacuum centrifugation	Samples were homogenized in TRIzol followed by phase separation with 1-bromo-3-chloropropane (BCP). An equal volume of 70% ethanol was added to the aqueous phase, which was then further purified using the RNeasy system according to manufacturer's protocol. The 50ul eluate was supplemented with 1ul SUPERase-In prior to concentration to 20uL by vacuum centrifugation	Samples were homogenized in TRIzol followed by phase separation with 1-bromo-3-chloropropane (BCP). An equal volume of 70% ethanol was added to the aqueous phase, which was then further purified using the RNeasy system according to manufacturer's protocol. The 50ul eluate was supplemented with 1ul SUPERase-In prior to concentration to 20uL by vacuum centrifugation	Samples were homogenized in TRIzol followed by phase separation with 1-bromo-3-chloropropane (BCP). An equal volume of 70% ethanol was added to the aqueous phase, which was then further purified using the RNeasy system according to manufacturer's protocol. The 50ul eluate was supplemented with 1ul SUPERase-In prior to concentration to 20uL by vacuum centrifugation	Samples were homogenized in TRIzol followed by phase separation with 1-bromo-3-chloropropane (BCP). An equal volume of 70% ethanol was added to the aqueous phase, which was then further purified using the RNeasy system according to manufacturer's protocol. The 50ul eluate was supplemented with 1ul SUPERase-In prior to concentration to 20uL by vacuum centrifugation	Samples were homogenized in TRIzol followed by phase separation with 1-bromo-3-chloropropane (BCP). An equal volume of 70% ethanol was added to the aqueous phase, which was then further purified using the RNeasy system according to manufacturer's protocol. The 50ul eluate was supplemented with 1ul SUPERase-In prior to concentration to 20uL by vacuum centrifugation	Samples were homogenized in TRIzol followed by phase separation with 1-bromo-3-chloropropane (BCP). An equal volume of 70% ethanol was added to the aqueous phase, which was then further purified using the RNeasy system according to manufacturer's protocol. The 50ul eluate was supplemented with 1ul SUPERase-In prior to concentration to 20uL by vacuum centrifugation	Samples were homogenized in TRIzol followed by phase separation with 1-bromo-3-chloropropane (BCP). An equal volume of 70% ethanol was added to the aqueous phase, which was then further purified using the RNeasy system according to manufacturer's protocol. The 50ul eluate was supplemented with 1ul SUPERase-In prior to concentration to 20uL by vacuum centrifugation	Samples were homogenized in TRIzol followed by phase separation with 1-bromo-3-chloropropane (BCP). An equal volume of 70% ethanol was added to the aqueous phase, which was then further purified using the RNeasy system according to manufacturer's protocol. The 50ul eluate was supplemented with 1ul SUPERase-In prior to concentration to 20uL by vacuum centrifugation	Samples were homogenized in TRIzol followed by phase separation with 1-bromo-3-chloropropane (BCP). An equal volume of 70% ethanol was added to the aqueous phase, which was then further purified using the RNeasy system according to manufacturer's protocol. The 50ul eluate was supplemented with 1ul SUPERase-In prior to concentration to 20uL by vacuum centrifugation	Samples were homogenized in TRIzol followed by phase separation with 1-bromo-3-chloropropane (BCP). An equal volume of 70% ethanol was added to the aqueous phase, which was then further purified using the RNeasy system according to manufacturer's protocol. The 50ul eluate was supplemented with 1ul SUPERase-In prior to concentration to 20uL by vacuum centrifugation	Samples were homogenized in TRIzol followed by phase separation with 1-bromo-3-chloropropane (BCP). An equal volume of 70% ethanol was added to the aqueous phase, which was then further purified using the RNeasy system according to manufacturer's protocol. The 50ul eluate was supplemented with 1ul SUPERase-In prior to concentration to 20uL by vacuum centrifugation
!Sample_label_ch1	biotin	biotin	biotin	biotin	biotin	biotin	biotin	biotin	biotin	biotin	biotin	biotin	biotin	biotin	biotin	biotin	biotin
!Sample_label_protocol_ch1	Biotinylated cRNA were prepared according to the standard Affymetrix protocol from ? ug total RNA (Expression Analysis Technical Manual, 2001, Affymetrix).	Biotinylated cRNA were prepared according to the standard Affymetrix protocol from ? ug total RNA (Expression Analysis Technical Manual, 2001, Affymetrix).	Biotinylated cRNA were prepared according to the standard Affymetrix protocol from ? ug total RNA (Expression Analysis Technical Manual, 2001, Affymetrix).	Biotinylated cRNA were prepared according to the standard Affymetrix protocol from ? ug total RNA (Expression Analysis Technical Manual, 2001, Affymetrix).	Biotinylated cRNA were prepared according to the standard Affymetrix protocol from ? ug total RNA (Expression Analysis Technical Manual, 2001, Affymetrix).	Biotinylated cRNA were prepared according to the standard Affymetrix protocol from ? ug total RNA (Expression Analysis Technical Manual, 2001, Affymetrix).	Biotinylated cRNA were prepared according to the standard Affymetrix protocol from ? ug total RNA (Expression Analysis Technical Manual, 2001, Affymetrix).	Biotinylated cRNA were prepared according to the standard Affymetrix protocol from ? ug total RNA (Expression Analysis Technical Manual, 2001, Affymetrix).	Biotinylated cRNA were prepared according to the standard Affymetrix protocol from ? ug total RNA (Expression Analysis Technical Manual, 2001, Affymetrix).	Biotinylated cRNA were prepared according to the standard Affymetrix protocol from ? ug total RNA (Expression Analysis Technical Manual, 2001, Affymetrix).	Biotinylated cRNA were prepared according to the standard Affymetrix protocol from ? ug total RNA (Expression Analysis Technical Manual, 2001, Affymetrix).	Biotinylated cRNA were prepared according to the standard Affymetrix protocol from ? ug total RNA (Expression Analysis Technical Manual, 2001, Affymetrix).	Biotinylated cRNA were prepared according to the standard Affymetrix protocol from ? ug total RNA (Expression Analysis Technical Manual, 2001, Affymetrix).	Biotinylated cRNA were prepared according to the standard Affymetrix protocol from ? ug total RNA (Expression Analysis Technical Manual, 2001, Affymetrix).	Biotinylated cRNA were prepared according to the standard Affymetrix protocol from ? ug total RNA (Expression Analysis Technical Manual, 2001, Affymetrix).	Biotinylated cRNA were prepared according to the standard Affymetrix protocol from ? ug total RNA (Expression Analysis Technical Manual, 2001, Affymetrix).	Biotinylated cRNA were prepared according to the standard Affymetrix protocol from ? ug total RNA (Expression Analysis Technical Manual, 2001, Affymetrix).
!Sample_taxid_ch1	10090	10090	10090	10090	10090	10090	10090	10090	10090	10090	10090	10090	10090	10090	10090	10090	10090
!Sample_hyb_protocol	cRNA was hybridized for 16 hr at 45C on Mouse 430 2.0 genome arrays (Expression Analysis Technical Manual, 2001, Affymetrix). GeneChips were washed and stained in the Affymetrix Fluidics Station 450.	cRNA was hybridized for 16 hr at 45C on Mouse 430 2.0 genome arrays (Expression Analysis Technical Manual, 2001, Affymetrix). GeneChips were washed and stained in the Affymetrix Fluidics Station 450.	cRNA was hybridized for 16 hr at 45C on Mouse 430 2.0 genome arrays (Expression Analysis Technical Manual, 2001, Affymetrix). GeneChips were washed and stained in the Affymetrix Fluidics Station 450.	cRNA was hybridized for 16 hr at 45C on Mouse 430 2.0 genome arrays (Expression Analysis Technical Manual, 2001, Affymetrix). GeneChips were washed and stained in the Affymetrix Fluidics Station 450.	cRNA was hybridized for 16 hr at 45C on Mouse 430 2.0 genome arrays (Expression Analysis Technical Manual, 2001, Affymetrix). GeneChips were washed and stained in the Affymetrix Fluidics Station 450.	cRNA was hybridized for 16 hr at 45C on Mouse 430 2.0 genome arrays (Expression Analysis Technical Manual, 2001, Affymetrix). GeneChips were washed and stained in the Affymetrix Fluidics Station 450.	cRNA was hybridized for 16 hr at 45C on Mouse 430 2.0 genome arrays (Expression Analysis Technical Manual, 2001, Affymetrix). GeneChips were washed and stained in the Affymetrix Fluidics Station 450.	cRNA was hybridized for 16 hr at 45C on Mouse 430 2.0 genome arrays (Expression Analysis Technical Manual, 2001, Affymetrix). GeneChips were washed and stained in the Affymetrix Fluidics Station 450.	cRNA was hybridized for 16 hr at 45C on Mouse 430 2.0 genome arrays (Expression Analysis Technical Manual, 2001, Affymetrix). GeneChips were washed and stained in the Affymetrix Fluidics Station 450.	cRNA was hybridized for 16 hr at 45C on Mouse 430 2.0 genome arrays (Expression Analysis Technical Manual, 2001, Affymetrix). GeneChips were washed and stained in the Affymetrix Fluidics Station 450.	cRNA was hybridized for 16 hr at 45C on Mouse 430 2.0 genome arrays (Expression Analysis Technical Manual, 2001, Affymetrix). GeneChips were washed and stained in the Affymetrix Fluidics Station 450.	cRNA was hybridized for 16 hr at 45C on Mouse 430 2.0 genome arrays (Expression Analysis Technical Manual, 2001, Affymetrix). GeneChips were washed and stained in the Affymetrix Fluidics Station 450.	cRNA was hybridized for 16 hr at 45C on Mouse 430 2.0 genome arrays (Expression Analysis Technical Manual, 2001, Affymetrix). GeneChips were washed and stained in the Affymetrix Fluidics Station 450.	cRNA was hybridized for 16 hr at 45C on Mouse 430 2.0 genome arrays (Expression Analysis Technical Manual, 2001, Affymetrix). GeneChips were washed and stained in the Affymetrix Fluidics Station 450.	cRNA was hybridized for 16 hr at 45C on Mouse 430 2.0 genome arrays (Expression Analysis Technical Manual, 2001, Affymetrix). GeneChips were washed and stained in the Affymetrix Fluidics Station 450.	cRNA was hybridized for 16 hr at 45C on Mouse 430 2.0 genome arrays (Expression Analysis Technical Manual, 2001, Affymetrix). GeneChips were washed and stained in the Affymetrix Fluidics Station 450.	cRNA was hybridized for 16 hr at 45C on Mouse 430 2.0 genome arrays (Expression Analysis Technical Manual, 2001, Affymetrix). GeneChips were washed and stained in the Affymetrix Fluidics Station 450.
!Sample_scan_protocol	GeneChips were scanned using the GeneChip Scanner 3000 7G at 3um resolution after excitation at 570 nm.	GeneChips were scanned using the GeneChip Scanner 3000 7G at 3um resolution after excitation at 570 nm.	GeneChips were scanned using the GeneChip Scanner 3000 7G at 3um resolution after excitation at 570 nm.	GeneChips were scanned using the GeneChip Scanner 3000 7G at 3um resolution after excitation at 570 nm.	GeneChips were scanned using the GeneChip Scanner 3000 7G at 3um resolution after excitation at 570 nm.	GeneChips were scanned using the GeneChip Scanner 3000 7G at 3um resolution after excitation at 570 nm.	GeneChips were scanned using the GeneChip Scanner 3000 7G at 3um resolution after excitation at 570 nm.	GeneChips were scanned using the GeneChip Scanner 3000 7G at 3um resolution after excitation at 570 nm.	GeneChips were scanned using the GeneChip Scanner 3000 7G at 3um resolution after excitation at 570 nm.	GeneChips were scanned using the GeneChip Scanner 3000 7G at 3um resolution after excitation at 570 nm.	GeneChips were scanned using the GeneChip Scanner 3000 7G at 3um resolution after excitation at 570 nm.	GeneChips were scanned using the GeneChip Scanner 3000 7G at 3um resolution after excitation at 570 nm.	GeneChips were scanned using the GeneChip Scanner 3000 7G at 3um resolution after excitation at 570 nm.	GeneChips were scanned using the GeneChip Scanner 3000 7G at 3um resolution after excitation at 570 nm.	GeneChips were scanned using the GeneChip Scanner 3000 7G at 3um resolution after excitation at 570 nm.	GeneChips were scanned using the GeneChip Scanner 3000 7G at 3um resolution after excitation at 570 nm.	GeneChips were scanned using the GeneChip Scanner 3000 7G at 3um resolution after excitation at 570 nm.
!Sample_description	non-sleep deprived mouse control	non-sleep deprived mouse control	non-sleep deprived mouse control	non-sleep deprived mouse control	non-sleep deprived mouse control	non-sleep deprived mouse control	non-sleep deprived mouse control	non-sleep deprived mouse control	non-sleep deprived mouse control	sleep deprived mouse	sleep deprived mouse	sleep deprived mouse	sleep deprived mouse	sleep deprived mouse	sleep deprived mouse	sleep deprived mouse	sleep deprived mouse
!Sample_data_processing	The average signal from two sequential scans was calculated for each microarray feature. RMA normalization of signal instensity was performed using the Affy package from R/Bioconductor	The average signal from two sequential scans was calculated for each microarray feature. RMA normalization of signal instensity was performed using the Affy package from R/Bioconductor	The average signal from two sequential scans was calculated for each microarray feature. RMA normalization of signal instensity was performed using the Affy package from R/Bioconductor	The average signal from two sequential scans was calculated for each microarray feature. RMA normalization of signal instensity was performed using the Affy package from R/Bioconductor	The average signal from two sequential scans was calculated for each microarray feature. RMA normalization of signal instensity was performed using the Affy package from R/Bioconductor	The average signal from two sequential scans was calculated for each microarray feature. RMA normalization of signal instensity was performed using the Affy package from R/Bioconductor	The average signal from two sequential scans was calculated for each microarray feature. RMA normalization of signal instensity was performed using the Affy package from R/Bioconductor	The average signal from two sequential scans was calculated for each microarray feature. RMA normalization of signal instensity was performed using the Affy package from R/Bioconductor	The average signal from two sequential scans was calculated for each microarray feature. RMA normalization of signal instensity was performed using the Affy package from R/Bioconductor	The average signal from two sequential scans was calculated for each microarray feature. RMA normalization of signal instensity was performed using the Affy package from R/Bioconductor	The average signal from two sequential scans was calculated for each microarray feature. RMA normalization of signal instensity was performed using the Affy package from R/Bioconductor	The average signal from two sequential scans was calculated for each microarray feature. RMA normalization of signal instensity was performed using the Affy package from R/Bioconductor	The average signal from two sequential scans was calculated for each microarray feature. RMA normalization of signal instensity was performed using the Affy package from R/Bioconductor	The average signal from two sequential scans was calculated for each microarray feature. RMA normalization of signal instensity was performed using the Affy package from R/Bioconductor	The average signal from two sequential scans was calculated for each microarray feature. RMA normalization of signal instensity was performed using the Affy package from R/Bioconductor	The average signal from two sequential scans was calculated for each microarray feature. RMA normalization of signal instensity was performed using the Affy package from R/Bioconductor	The average signal from two sequential scans was calculated for each microarray feature. RMA normalization of signal instensity was performed using the Affy package from R/Bioconductor
!Sample_platform_id	GPL1261	GPL1261	GPL1261	GPL1261	GPL1261	GPL1261	GPL1261	GPL1261	GPL1261	GPL1261	GPL1261	GPL1261	GPL1261	GPL1261	GPL1261	GPL1261	GPL1261
!Sample_contact_name	Lucia,,Peixoto	Lucia,,Peixoto	Lucia,,Peixoto	Lucia,,Peixoto	Lucia,,Peixoto	Lucia,,Peixoto	Lucia,,Peixoto	Lucia,,Peixoto	Lucia,,Peixoto	Lucia,,Peixoto	Lucia,,Peixoto	Lucia,,Peixoto	Lucia,,Peixoto	Lucia,,Peixoto	Lucia,,Peixoto	Lucia,,Peixoto	Lucia,,Peixoto
!Sample_contact_email	lucia.peixoto@wsu.edu	lucia.peixoto@wsu.edu	lucia.peixoto@wsu.edu	lucia.peixoto@wsu.edu	lucia.peixoto@wsu.edu	lucia.peixoto@wsu.edu	lucia.peixoto@wsu.edu	lucia.peixoto@wsu.edu	lucia.peixoto@wsu.edu	lucia.peixoto@wsu.edu	lucia.peixoto@wsu.edu	lucia.peixoto@wsu.edu	lucia.peixoto@wsu.edu	lucia.peixoto@wsu.edu	lucia.peixoto@wsu.edu	lucia.peixoto@wsu.edu	lucia.peixoto@wsu.edu
!Sample_contact_department	College of Medical Sciences	College of Medical Sciences	College of Medical Sciences	College of Medical Sciences	College of Medical Sciences	College of Medical Sciences	College of Medical Sciences	College of Medical Sciences	College of Medical Sciences	College of Medical Sciences	College of Medical Sciences	College of Medical Sciences	College of Medical Sciences	College of Medical Sciences	College of Medical Sciences	College of Medical Sciences	College of Medical Sciences
!Sample_contact_institute	Washington State University, Spokane	Washington State University, Spokane	Washington State University, Spokane	Washington State University, Spokane	Washington State University, Spokane	Washington State University, Spokane	Washington State University, Spokane	Washington State University, Spokane	Washington State University, Spokane	Washington State University, Spokane	Washington State University, Spokane	Washington State University, Spokane	Washington State University, Spokane	Washington State University, Spokane	Washington State University, Spokane	Washington State University, Spokane	Washington State University, Spokane
!Sample_contact_address	PO Box 1495	PO Box 1495	PO Box 1495	PO Box 1495	PO Box 1495	PO Box 1495	PO Box 1495	PO Box 1495	PO Box 1495	PO Box 1495	PO Box 1495	PO Box 1495	PO Box 1495	PO Box 1495	PO Box 1495	PO Box 1495	PO Box 1495
!Sample_contact_city	Spokane	Spokane	Spokane	Spokane	Spokane	Spokane	Spokane	Spokane	Spokane	Spokane	Spokane	Spokane	Spokane	Spokane	Spokane	Spokane	Spokane
!Sample_contact_state	WA	WA	WA	WA	WA	WA	WA	WA	WA	WA	WA	WA	WA	WA	WA	WA	WA
!Sample_contact_zip/postal_code	99224	99224	99224	99224	99224	99224	99224	99224	99224	99224	99224	99224	99224	99224	99224	99224	99224
!Sample_contact_country	USA	USA	USA	USA	USA	USA	USA	USA	USA	USA	USA	USA	USA	USA	USA	USA	USA
!Sample_supplementary_file	ftp://ftp.ncbi.nlm.nih.gov/geo/samples/GSM824nnn/GSM824682/suppl/GSM824682.CEL.gz	ftp://ftp.ncbi.nlm.nih.gov/geo/samples/GSM824nnn/GSM824683/suppl/GSM824683.CEL.gz	ftp://ftp.ncbi.nlm.nih.gov/geo/samples/GSM824nnn/GSM824684/suppl/GSM824684.CEL.gz	ftp://ftp.ncbi.nlm.nih.gov/geo/samples/GSM824nnn/GSM824685/suppl/GSM824685.CEL.gz	ftp://ftp.ncbi.nlm.nih.gov/geo/samples/GSM824nnn/GSM824686/suppl/GSM824686.CEL.gz	ftp://ftp.ncbi.nlm.nih.gov/geo/samples/GSM824nnn/GSM824687/suppl/GSM824687.CEL.gz	ftp://ftp.ncbi.nlm.nih.gov/geo/samples/GSM824nnn/GSM824688/suppl/GSM824688.CEL.gz	ftp://ftp.ncbi.nlm.nih.gov/geo/samples/GSM824nnn/GSM824689/suppl/GSM824689.CEL.gz	ftp://ftp.ncbi.nlm.nih.gov/geo/samples/GSM824nnn/GSM824690/suppl/GSM824690.CEL.gz	ftp://ftp.ncbi.nlm.nih.gov/geo/samples/GSM824nnn/GSM824691/suppl/GSM824691.CEL.gz	ftp://ftp.ncbi.nlm.nih.gov/geo/samples/GSM824nnn/GSM824692/suppl/GSM824692.CEL.gz	ftp://ftp.ncbi.nlm.nih.gov/geo/samples/GSM824nnn/GSM824693/suppl/GSM824693.CEL.gz	ftp://ftp.ncbi.nlm.nih.gov/geo/samples/GSM824nnn/GSM824694/suppl/GSM824694.CEL.gz	ftp://ftp.ncbi.nlm.nih.gov/geo/samples/GSM824nnn/GSM824695/suppl/GSM824695.CEL.gz	ftp://ftp.ncbi.nlm.nih.gov/geo/samples/GSM824nnn/GSM824696/suppl/GSM824696.CEL.gz	ftp://ftp.ncbi.nlm.nih.gov/geo/samples/GSM824nnn/GSM824697/suppl/GSM824697.CEL.gz	ftp://ftp.ncbi.nlm.nih.gov/geo/samples/GSM824nnn/GSM824698/suppl/GSM824698.CEL.gz
!Sample_data_row_count	45101	45101	45101	45101	45101	45101	45101	45101	45101	45101	45101	45101	45101	45101	45101	45101	45101
!series_matrix_table_begin
ID_REF	GSM824682	GSM824683	GSM824684	GSM824685	GSM824686	GSM824687	GSM824688	GSM824689	GSM824690	GSM824691	GSM824692	GSM824693	GSM824694	GSM824695	GSM824696	GSM824697	GSM824698
1415670_at	9.97694	9.917	9.83473	9.87995	9.68793	9.84483	9.90008	9.79014	9.77346	9.97377	9.76091	9.81619	9.84853	9.48629	9.83473	9.8503	9.83366
1415671_at	12.3529	12.3679	12.3586	12.3853	12.3572	12.3933	12.3107	12.1058	12.2042	12.306	12.2324	12.3206	12.3707	12.1011	12.2776	12.3017	12.3508
1415672_at	11.5498	11.4915	11.5988	11.6018	11.5772	11.6087	11.6412	11.5473	11.5221	11.5571	11.4653	11.6501	11.6587	11.5104	11.6332	11.4685	11.7176
1415673_at	8.6449	8.57619	8.71946	8.82751	8.78668	8.72942	8.69441	8.63775	8.63711	8.80396	8.61798	8.9211	8.94296	8.81452	8.80927	8.74901	8.94462
1415674_a_at	9.46218	9.48756	9.56173	9.62411	9.62744	9.61344	9.64816	9.72157	9.70855	9.61256	9.54965	9.58124	9.65842	9.60588	9.55575	9.61344	9.55029
1415675_at	9.37495	9.34573	9.32646	9.45484	9.39275	9.43329	9.3418	9.53566	9.45214	9.40708	9.45614	9.41267	9.3875	9.42022	9.40708	9.40708	9.36576
1415676_a_at	11.5004	11.516	11.5793	11.5775	11.7025	11.6236	11.5488	11.5181	11.5756	11.5407	11.4844	11.4534	11.7916	11.6285	11.666	11.6318	11.5793
1415677_at	10.1728	10.1041	10.0493	10.2146	10.1258	10.1255	10.1283	10.1173	10.0908	10.2199	9.97147	10.0103	10.1363	9.95988	10.0569	9.9745	10.0497
1415678_at	11.2242	11.1274	11.1542	11.2352	11.1735	11.2313	11.1673	11.1927	11.1171	11.1537	10.9849	11.0722	11.176	11.0139	11.0419	11.0867	11.0786
1415679_at	10.8767	10.8498	10.9069	10.9223	10.9738	10.9963	10.9982	11.0603	11.0312	11.0187	11.0594	10.9082	10.9254	11.0796	10.9255	10.9685	10.9362
1415680_at	8.62502	8.58987	8.56562	8.55691	8.56545	8.565	8.61616	8.71288	8.60002	8.565	8.51321	8.3968	8.56294	8.38219	8.40011	8.58517	8.4882
1415681_at	10.162	10.2194	10.1189	10.2212	10.1774	10.1041	10.1459	10.2077	10.153	10.2324	10.1311	10.2758	10.2139	10.1276	10.1579	10.1192	10.1509
1415682_at	8.87858	8.88418	8.81421	8.88586	8.81421	8.78796	8.81421	8.60932	8.5968	8.90727	8.82276	8.75633	8.8811	8.79726	8.8126	8.7676	8.83331
1415683_at	11.1093	11.0286	11.1569	11.0238	11.1316	11.1298	11.1831	11.1094	11.0913	11.1257	11.0655	11.1209	11.0623	10.8746	11.0354	11.1435	11.0518
1415684_at	8.26992	8.42994	8.47291	8.48735	8.45152	8.53028	8.52365	8.23003	8.32095	8.45152	8.27361	8.51835	8.71385	8.50633	8.42605	8.34332	8.64781
1415685_at	8.74628	8.78439	8.79745	8.99846	8.8361	8.80949	8.95686	8.59252	8.75107	8.67723	8.36537	8.39973	8.6247	8.65295	8.93126	8.68217	8.58281
1415686_at	11.316	11.2301	11.2418	11.2883	11.2723	11.2458	11.2928	11.0019	10.9144	11.2834	11.1093	11.1064	11.1723	11.0513	11.2407	11.2227	11.2375
1415687_a_at	12.9715	13.291	12.9875	13.0747	12.4997	12.7777	13.0185	12.8619	12.9029	13.0004	12.4816	12.6819	12.8187	12.8835	12.9743	12.4787	12.9123
1415688_at	10.4747	10.4409	10.3993	10.4372	10.2938	10.378	10.357	10.3794	10.4352	10.4281	10.2488	10.3993	10.4103	10.2651	10.4719	10.2892	10.4384
1415689_s_at	8.69471	8.55177	8.58226	8.62535	8.45685	8.49572	8.46755	8.36886	8.4966	8.60854	8.50949	8.5082	8.58712	8.50959	8.35851	8.40526	8.45887
1415690_at	10.8666	10.8603	10.9671	11.0393	11.114	11.0145	10.953	11.001	11.0486	10.948	10.8557	11.0507	11.0577	11.0399	10.9341	10.9829	10.9313
1415691_at	10.814	10.6681	10.6076	10.7688	10.6661	10.7482	10.6206	10.79	10.5653	10.5896	10.6098	10.6961	10.6567	10.7691	10.5369	10.6528	10.7526
1415692_s_at	11.5628	11.3679	11.5575	11.5364	11.4227	11.5476	11.6359	11.4904	11.5669	11.4727	11.1562	11.5185	11.4562	11.4628	11.5032	11.3857	11.5347
1415693_at	8.85675	8.92463	8.93339	8.91092	8.92019	8.97556	8.92169	8.80817	8.98856	8.96959	8.84431	9.00596	9.01086	9.02157	8.93939	8.97345	8.92715
1415694_at	9.74578	9.60722	9.66944	9.6834	9.58323	9.71275	9.73602	9.56208	9.58462	9.7474	9.57001	9.62735	9.69628	9.33681	9.50277	9.7058	9.61664
1415695_at	10.4983	10.4655	10.5485	10.6396	10.521	10.6382	10.6115	10.5593	10.4933	10.4896	10.1933	10.504	10.6106	10.303	10.5591	10.5156	10.523
1415696_at	10.678	10.7317	10.7406	10.8889	10.7446	10.7942	10.7668	10.6657	10.6927	10.7513	10.7074	10.8411	10.792	10.8524	10.7576	10.7924	10.7809
1415697_at	10.2709	10.262	10.3797	10.1772	10.3575	10.4299	10.4562	10.418	10.4557	10.3914	10.3298	10.5608	10.3468	10.4367	10.276	10.4066	10.4647
1415698_at	10.5129	10.4342	10.509	10.4342	10.5877	10.3025	10.453	10.2733	10.3996	10.7991	10.6568	10.5883	10.6839	10.5674	10.7555	10.6088	10.4565
1415699_a_at	11.0549	10.9502	10.9254	11.0245	11.0416	10.9962	11.0572	11.0879	11.0672	11.0137	10.9599	10.9577	10.9872	10.944	10.9653	10.9114	10.9574
1415700_a_at	10.9771	11.0208	11.1205	11.0956	11.0737	11.0685	11.0604	11.0006	11.0325	11.1696	11.0048	11.1503	11.2634	11.1484	11.2042	11.1215	11.2463
1415701_x_at	12.9182	13.0452	13.1253	13.1327	13.2276	13.1697	13.1584	13.1576	13.1718	13.0757	13.0416	13.1672	13.0331	13.1304	13.0681	13.0945	13.1277
1415702_a_at	11.4847	11.4424	11.48	11.4853	11.3863	11.4144	11.5046	11.4295	11.4059	11.4102	11.4102	11.3287	11.3923	11.2647	11.2801	11.312	11.4258
1415703_at	10.4016	10.494	10.2024	10.2732	10.2573	10.1929	10.2141	10.1135	10.0844	10.3003	10.0894	10.3262	10.1594	10.0588	10.2341	10.1998	10.2028
1415704_a_at	9.89725	9.95534	9.85564	10.0112	9.95111	10.0131	9.85773	9.68226	9.75589	9.98075	9.79119	9.90974	9.91918	9.80795	9.94878	9.86712	9.94501
1415705_at	9.98411	9.90558	10.0759	10.141	9.98954	10.0709	9.98544	9.97586	9.92056	9.80272	9.7401	9.8885	10.0723	9.83525	9.93552	9.86667	9.92891
1415706_at	11.8073	11.7456	11.6745	11.7235	11.7114	11.7235	11.7216	11.7044	11.7235	11.7688	11.6821	11.7235	11.7483	11.5388	11.5529	11.7907	11.7612
1415707_at	9.99578	9.86154	9.69858	9.82242	9.7873	9.76905	9.84321	9.82163	9.76088	9.76721	9.76251	9.69321	9.66317	9.59102	9.63077	9.72343	9.72941
1415708_at	10.9861	10.7875	10.8035	10.9136	10.7551	10.7648	10.744	10.6615	10.662	10.8357	10.6331	10.8745	10.8736	10.7834	10.7282	10.7406	10.7922
1415709_s_at	9.28955	8.99243	8.83807	9.00299	8.8187	8.78769	8.97789	8.80793	8.74972	9.13673	9.05923	9.03368	9.03984	8.84753	8.83116	8.95305	8.9738
1415710_at	9.16971	9.13736	9.03715	9.03715	8.9544	9.07915	9.06813	8.94221	9.01995	9.19465	9.04138	9.21931	9.20001	8.85374	8.85179	8.94874	8.97058
1415711_at	10.699	10.4297	10.3702	10.3973	10.3061	10.3607	10.4489	10.395	10.3571	10.3151	10.2851	10.379	10.379	10.2832	10.4187	10.3148	10.481
1415712_at	9.5573	9.57712	9.53428	9.72992	9.63	9.46479	9.55157	9.20626	9.08603	9.6112	9.19691	9.35107	9.45724	9.22134	9.60196	9.35644	9.44709
1415713_a_at	10.9455	10.8805	10.7339	10.8141	10.7524	10.7761	10.6883	10.8101	10.8092	10.7506	10.6576	10.5935	10.7505	10.4962	10.5943	10.7161	10.6575
1415714_a_at	10.939	11.0112	10.9478	11.0621	11.1916	11.0332	11.0332	10.7612	10.8792	10.9755	10.7611	11.111	11.1369	11.0332	11.2153	11.05	11.1037
1415715_at	8.45209	8.23082	8.27206	8.39272	8.23604	8.42286	8.35939	8.286	8.18511	8.34794	8.0813	8.30568	8.21876	8.17175	8.20314	8.26017	8.36025
1415716_a_at	12.1894	12.1845	12.2349	12.4179	12.5254	12.4413	12.3325	12.2263	12.3002	12.2439	12.1192	12.3399	12.2866	12.3562	12.4828	12.4023	12.2833
1415717_at	9.66242	9.69628	9.76772	9.71326	9.6734	9.82676	9.72274	9.70449	9.70835	9.6806	9.74119	9.80346	9.88371	9.71326	9.63795	9.66052	9.63784
1415718_at	9.627	9.70456	9.66092	9.8756	9.72884	9.88311	9.65842	9.6586	9.51552	9.74185	9.44082	9.67191	9.67734	9.35644	9.62542	9.67992	9.61544
1415719_s_at	10.4906	10.636	10.62	10.7836	10.6729	10.6764	10.6405	10.3328	10.3893	10.5769	10.3807	10.5805	10.7664	10.6415	10.7688	10.597	10.775
1415720_s_at	7.27374	7.4706	7.37406	7.51258	7.52446	7.54993	7.50559	7.57844	7.55187	7.46519	7.52136	7.52914	7.50781	7.4794	7.49998	7.50559	7.59376
1415721_a_at	9.68462	9.75228	9.60887	9.73495	9.5664	9.67079	9.61373	9.58316	9.46106	9.6207	9.49038	9.78015	9.60014	9.47603	9.59623	9.66895	9.67031
1415722_a_at	10.2106	10.1432	10.1803	10.2239	10.2574	10.2437	10.2316	10.1873	10.2116	10.2368	10.1405	10.145	10.0918	10.1799	10.1602	10.171	10.1163
1415723_at	11.8922	11.8687	11.8073	11.8241	11.9025	11.8568	11.8139	11.7957	11.7289	11.7546	11.56	11.6399	11.7245	11.5909	11.5965	11.7138	11.6533
1415724_a_at	10.2319	10.2324	10.4113	10.5171	10.2808	10.4538	10.4145	10.3675	10.3872	10.3255	10.0961	10.3405	10.2501	10.094	10.4202	10.3004	10.4494
1415725_at	8.72547	8.71764	8.7581	8.86282	8.8612	8.80826	8.83197	8.68342	8.66832	8.80644	8.67837	8.73668	8.8898	8.63188	8.97547	8.77835	8.82628
1415726_at	10.4583	10.4908	10.3887	10.3776	10.359	10.42	10.4308	10.2882	10.3143	10.4761	10.268	10.3473	10.3485	10.3067	10.4818	10.4368	10.4554
1415727_at	10.4458	10.4254	10.5195	10.6083	10.6201	10.6432	10.5681	10.5126	10.5933	10.5413	10.3364	10.654	10.5046	10.5219	10.4992	10.5799	10.46
1415728_at	8.04639	8.36518	8.14484	8.11505	8.1768	8.05699	8.21817	7.90775	8.02806	8.22323	8.25386	7.88173	8.06991	8.13004	8.16817	7.72429	7.88715
1415729_at	10.1488	9.98302	10.0188	10.0144	9.8492	9.94623	9.96983	10.0696	10.0897	10	9.92989	10.0055	9.98607	10.0252	9.97148	9.94677	10.0479
1415730_at	9.89933	9.73159	9.60016	9.77552	9.60081	9.62036	9.61604	9.65298	9.52831	9.73917	9.65003	9.62357	9.55161	9.53393	9.50219	9.54994	9.60594
1415731_at	8.57884	8.76444	8.76571	8.69811	8.70378	8.64449	8.6327	8.58179	8.56456	8.77442	8.65785	8.61811	8.83762	8.75083	8.81959	8.67925	8.64244
1415732_at	9.8805	9.84864	9.83174	9.74678	9.89125	9.90121	9.84864	9.7932	9.88163	9.77608	9.89931	9.76571	9.84864	9.87273	9.84949	9.87012	9.69671
1415733_a_at	10.5005	10.4254	10.5417	10.6032	10.6107	10.6096	10.5884	10.6549	10.544	10.5369	10.4747	10.6824	10.7188	10.6831	10.5955	10.6498	10.5753
1415734_at	12.0425	11.9762	11.953	12.0198	11.9257	12.0413	12.0028	11.985	12.0277	11.8945	11.8727	11.799	11.9299	11.817	11.7778	11.8879	11.9328
1415735_at	10.383	10.3162	10.319	10.3411	10.2611	10.2723	10.3991	10.4506	10.3828	10.2826	10.4345	10.195	10.2937	10.2623	10.1621	10.3629	10.2356
1415736_at	11.1501	11.0649	11.4103	11.4038	11.4506	11.4569	11.5533	11.4233	11.4211	11.2159	11.0253	11.3137	11.3501	11.2727	11.4936	11.3774	11.3417
1415737_at	9.7099	9.5444	9.66654	9.7238	9.62813	9.6499	9.66024	9.72974	9.66024	9.66024	9.4868	9.79816	9.58284	9.73385	9.67272	9.62517	9.69322
1415738_at	9.30352	9.16937	9.17835	9.24469	9.23367	9.24469	9.22924	9.37755	9.29855	9.22811	9.18269	9.3873	9.30014	9.21643	9.05918	9.21924	9.29467
1415739_at	10.4008	10.3943	10.2368	10.3175	10.2925	10.3247	10.3308	10.1365	10.1757	10.4343	10.291	10.1748	10.3277	10.1018	10.2626	10.2727	10.2259
1415740_at	11.5471	11.5144	11.5411	11.6046	11.7129	11.7052	11.6426	11.5016	11.6027	11.5307	11.5217	11.556	11.645	11.5403	11.6693	11.5823	11.5693
1415741_at	10.0886	9.94793	9.93588	10.0387	10.0349	10.064	10.0446	10.0962	10.0003	9.88536	9.81218	9.88507	9.90453	9.82134	9.88717	9.81085	9.92842
1415742_at	8.36948	8.33092	8.22247	8.28219	8.18573	8.26493	8.39628	8.26493	8.21108	8.29121	8.22285	8.21108	8.28803	8.41491	8.18653	8.274	8.14902
1415743_at	9.93541	10.0618	9.92788	10.0435	9.93917	10.0744	10.0343	9.95875	9.84745	9.95875	9.85831	10.0961	9.97445	9.91835	9.88548	9.9245	9.97965
1415744_at	10.3905	10.4163	10.5289	10.6428	10.5797	10.5318	10.5391	10.6762	10.63	10.4928	10.4159	10.3702	10.4632	10.6404	10.4897	10.4487	10.4978
1415745_a_at	9.07639	8.98861	9.07217	9.118	8.87809	9.10009	9.06249	9.11528	9.11899	9.12227	8.8665	9.10452	9.10072	9.25973	8.88665	8.90624	9.07217
1415746_at	9.9328	10.0491	9.88002	9.92954	9.83589	9.87476	9.93336	9.71888	9.62654	9.76025	9.83589	9.88465	9.71795	9.66926	9.93363	9.77349	9.7718
1415747_s_at	10.2408	10.0302	10.117	10.1106	10.0105	10.0652	10.0753	10.0844	10.0802	10.0468	9.89853	9.87756	10.0929	9.84258	10.0735	10.0368	9.9509
1415748_a_at	10.8191	10.7131	10.899	10.8322	10.9724	10.9137	10.9711	10.8943	10.9946	10.9276	10.7549	11.0374	10.8501	10.898	10.8785	10.9018	10.9039
1415749_a_at	10.4927	10.3411	10.4322	10.6003	10.4642	10.511	10.4795	10.3497	10.3809	10.5186	10.3818	10.5477	10.4505	10.4632	10.4795	10.5051	10.5301
1415750_at	7.3659	7.43683	7.48636	7.40009	7.41535	7.58685	7.50506	7.40872	7.37636	7.5703	7.39391	7.36607	7.4509	7.44156	7.43683	7.3757	7.40378
1415751_at	11.5623	11.5169	11.435	11.5276	11.3805	11.4457	11.459	11.4127	11.4433	11.4932	11.3511	11.4263	11.4229	11.2447	11.3978	11.4123	11.3952
1415752_at	11.6839	11.7422	11.7613	11.8324	11.8591	11.8877	11.7749	11.706	11.8073	11.8585	11.7204	11.9089	11.909	11.8097	11.8038	11.8483	11.8605
1415753_at	11.3115	11.2826	11.3596	11.3789	11.2595	11.3869	11.3681	11.2629	11.2723	11.4019	11.2172	11.4139	11.3813	11.1089	11.2664	11.3212	11.2708
1415754_at	9.36777	9.36035	9.38897	9.51733	9.54832	9.57631	9.52475	9.66462	9.50029	9.50029	9.36902	9.5038	9.56161	9.51005	9.43679	9.5408	9.41785
1415755_a_at	11.1526	11.2526	11.1633	11.2113	11.0751	11.1977	11.2362	11.2096	11.151	11.2415	11.1394	11.1917	11.1701	11.0321	10.9515	11.1338	11.0916
1415756_a_at	9.98991	9.89507	9.99706	9.96212	9.99469	10.0888	9.98593	9.76617	9.91191	9.91588	9.87596	9.96797	10.0257	9.88261	9.86992	9.86404	9.8741
1415757_at	9.52835	9.82974	9.51097	9.5994	9.38686	9.44017	9.46015	9.27589	9.32645	9.81024	9.6482	9.709	9.52954	9.44829	9.65108	9.61387	9.50042
1415758_at	9.64705	9.39462	9.23338	9.41842	9.33617	9.30253	9.43595	9.51689	9.30372	9.54518	9.43222	9.24013	9.22939	9.16443	9.30571	9.44118	9.36197
1415759_a_at	10.7493	10.6363	10.7444	10.8539	10.8504	10.8458	10.813	10.9167	10.9231	10.9001	10.8227	11.0133	10.9331	10.9927	10.8255	10.8882	10.8887
1415760_s_at	9.70166	9.7439	9.77547	9.85376	9.91201	9.95586	9.84191	9.73613	9.91724	9.83095	9.65514	9.90842	9.91037	9.96219	9.7493	9.84191	9.84191
1415761_at	8.64397	8.60922	8.81536	8.9287	8.8127	8.87087	8.78346	8.79944	8.90198	8.71046	8.60512	8.77108	8.76627	8.86565	8.87186	8.63306	8.77018
1415762_x_at	8.80552	8.85134	8.88776	9.01657	9.0777	9.0504	8.85683	8.87226	8.85157	8.87675	8.65302	8.92714	8.89965	8.81308	9.08898	8.85198	8.86833
1415763_a_at	10.4823	10.4214	10.3486	10.4168	10.5042	10.4195	10.3462	10.3874	10.3622	10.3573	10.4006	10.4015	10.4729	10.4343	10.2411	10.3235	10.339
1415764_at	11.1914	11.0566	10.7866	11.0625	10.828	10.7216	10.862	10.9702	10.9005	11.0373	11.0106	10.9259	10.9808	10.8654	10.9316	10.8941	10.9881
1415765_at	8.5239	8.68802	8.62921	8.62847	8.57158	8.51442	8.76863	8.51985	8.50931	8.58477	8.47515	8.52215	8.53831	8.33053	8.84111	8.48446	8.3435
1415766_at	9.78089	9.79778	9.72423	9.89387	9.60805	9.78283	9.71642	9.57814	9.47796	9.99863	9.57279	9.76408	9.84481	9.66879	9.82593	9.8623	9.88024
1415767_at	10.3531	10.2087	10.2628	10.2118	10.0914	10.2166	10.3026	10.1004	10.1787	10.2382	10.1827	10.1365	10.1544	9.92867	9.98469	10.1491	10.1864
1415768_a_at	9.92577	9.8526	9.80066	9.85438	9.7278	9.86587	9.88229	9.73731	9.70581	9.81957	9.57168	9.80634	9.71347	9.44594	9.85366	9.74893	9.7764
1415769_at	9.15674	9.2132	9.0273	9.2388	9.15212	9.10751	9.17663	9.1317	9.15674	9.09962	9.01608	9.09711	9.22508	9.29664	9.21887	9.2502	9.23309
1415770_at	11.4185	11.4918	11.3459	11.4147	11.2684	11.2396	11.2479	11.1705	11.1834	11.1646	10.9889	11.1337	11.2788	10.8107	11.1219	11.2284	11.0804
1415771_at	11.5993	11.7429	11.7455	11.7444	11.6968	11.7874	11.6663	11.5544	11.5724	11.6493	11.4687	11.6354	11.7336	11.4896	11.7543	11.6287	11.6222
1415772_at	7.98412	7.76539	7.89905	8.0984	7.76041	7.70215	7.97818	7.73742	7.81942	7.83374	7.3472	7.67259	7.9652	7.82572	7.88635	7.73174	7.96168
1415773_at	9.86952	9.97121	10.2705	10.2634	10.0544	10.3379	10.1492	10.0497	10.1426	10.1395	9.73794	10.0926	10.1	9.6871	10.2319	10.0794	10.0515
1415774_at	8.90968	8.98428	9.03089	9.04307	8.9865	9.09893	8.98792	8.94515	9.05867	8.95142	8.90406	8.8266	8.92713	9.01259	9.01173	8.9595	9.0009
1415775_at	11.8522	11.7729	11.812	11.7922	11.7904	11.7925	11.8423	11.7758	11.8317	11.713	11.6586	11.621	11.7669	11.5842	11.7575	11.6762	11.7656
1415776_at	8.1553	8.16478	8.11053	8.34708	8.09308	8.12406	8.18288	8.181	8.1078	8.22181	8.06681	8.06948	8.17245	8.16857	8.13667	7.99168	8.17302
1415777_at	4.32488	4.15713	4.31037	4.2859	4.35432	4.34438	4.22495	4.31344	4.15675	4.32846	4.40817	4.66676	4.3197	4.38222	4.37335	4.2473	4.49263
1415778_at	12.266	12.3088	12.3582	12.3253	12.3259	12.3462	12.2868	12.2612	12.3931	12.2633	12.208	12.3991	12.3285	12.2798	12.3721	12.2899	12.3572
1415779_s_at	13.4501	13.3688	13.3701	13.3226	13.2681	13.3239	13.3625	13.3523	13.3509	13.2016	13.2417	13.2424	13.298	13.0595	13.2553	13.2408	13.2794
1415780_a_at	10.6758	10.7238	10.6497	10.7787	10.5345	10.6278	10.6756	10.5799	10.5808	10.5068	10.4262	10.4786	10.4024	10.4869	10.6473	10.5267	10.638
1415781_a_at	13.3255	13.3091	13.431	13.3942	13.2801	13.3572	13.3565	13.4158	13.3969	13.3676	13.1917	13.3051	13.372	13.1789	13.3901	13.3682	13.3395
1415782_at	12.5266	12.5018	12.6528	12.6198	12.6718	12.6451	12.6694	12.5416	12.6367	12.617	12.4637	12.6168	12.643	12.5167	12.6168	12.634	12.6102
1415783_at	11.7466	11.6844	11.7841	11.85	11.8285	11.7739	11.7825	11.7212	11.7667	11.6813	11.5709	11.7036	11.7421	11.758	11.8187	11.767	11.8702
1415784_at	9.14508	8.9959	9.26263	9.00435	9.19335	9.29803	9.15734	9.38059	9.40141	9.3333	8.93466	9.35656	9.26582	8.98051	9.08329	9.14456	9.27997
1415785_a_at	10.5917	10.7785	10.8678	10.7919	10.7721	10.9317	10.8983	10.7183	10.7262	10.7478	10.4386	10.706	10.7533	10.8149	10.9367	10.6984	10.8635
1415786_at	4.92299	5.07392	5.41113	5.21437	5.48646	5.20031	5.22638	5.4799	5.36391	5.30126	5.49253	5.35403	5.15267	5.48141	5.40787	5.33908	5.24956
1415787_at	9.3806	9.50443	9.43388	9.53764	9.33535	9.4861	9.43608	9.40386	9.42432	9.69928	9.35259	9.56851	9.4247	9.40988	9.47203	9.53667	9.43523
1415788_at	10.2625	10.2227	10.2687	10.3927	10.2719	10.4105	10.3006	10.3006	10.2875	10.3602	10.2094	10.2868	10.375	10.3899	10.3006	10.2911	10.3553
1415789_a_at	8.3913	8.34847	8.68096	8.61083	8.45055	8.60628	8.59632	8.42271	8.39097	8.51493	8.13185	8.4151	8.58063	8.24588	8.48723	8.49415	8.47413
1415790_at	9.13487	9.05821	9.05527	9.18796	9.08494	9.04125	9.10042	9.07922	9.06416	9.13491	8.9104	9.02966	9.11209	9.02966	9.06416	8.92157	9.07908
1415791_at	10.2512	10.1775	10.3068	10.2625	10.1909	10.2768	10.235	10.3294	10.3944	10.2841	10.2374	10.2625	10.2478	10.2137	10.1589	10.194	10.2741
1415792_at	9.33227	9.5038	9.31026	9.53373	9.38574	9.50341	9.44741	9.23539	9.30462	9.41229	9.35286	9.33467	9.44554	9.39261	9.46027	9.43121	9.2208
1415793_at	9.23232	9.26899	9.34524	9.33366	9.32712	9.41675	9.25286	9.25553	9.37064	9.25717	9.16583	9.33818	9.35445	8.98304	9.07495	9.28805	9.21413
1415794_a_at	11.3771	11.4264	11.5076	11.5892	11.3941	11.4496	11.4663	11.3886	11.3496	11.4815	11.1909	11.4229	11.3727	11.2529	11.6328	11.4527	11.4584
1415795_at	8.28873	8.31961	8.38629	7.98065	8.32409	8.40227	8.41267	8.42425	8.24976	8.52993	8.21816	8.51593	8.44524	8.04101	8.43495	8.38341	8.51017
1415796_at	11.2291	11.2701	11.3072	11.2818	11.2645	11.3617	11.351	11.291	11.3906	11.2801	11.2024	11.2622	11.234	11.2033	11.2049	11.2576	11.2707
1415797_at	8.58922	8.75185	8.62493	8.65415	8.59113	8.71035	8.59643	8.39011	8.45316	8.71926	8.58922	8.65054	8.53265	8.38295	8.47199	8.52948	8.43328
1415798_at	7.41681	7.47512	7.44463	7.45614	7.37894	7.57925	7.30114	7.38764	7.51268	7.38913	7.47024	7.54233	7.18512	7.43076	7.37	7.18634	7.23124
1415799_at	10.3012	10.2431	10.2264	10.2751	10.0257	10.1056	10.2519	10.1362	9.99072	10.2019	10.0274	10.1191	10.065	9.75835	10.0342	10.1331	10.0921
1415800_at	11.5801	11.507	11.7788	11.7271	11.5734	11.7143	11.7692	11.8264	11.7209	11.6749	11.461	11.5654	11.5127	11.3792	11.8518	11.6749	11.7632
1415801_at	8.78856	9.03779	9.15471	8.56285	9.12954	9.26085	9.29161	8.92459	9.35516	9.14455	9.06455	9.35365	9.24565	9.08535	8.97248	9.05264	9.18688
1415802_at	9.73453	9.66516	9.72311	9.59461	9.53865	9.89346	9.66821	9.60246	9.85316	9.68039	9.68039	9.70973	9.61741	9.66539	9.71432	9.47487	9.78745
1415803_at	11.8674	11.8767	11.7871	11.9209	11.6885	11.8215	11.9682	11.5841	11.6103	11.9218	11.7787	11.8307	11.6777	11.411	11.7491	11.718	11.7683
1415804_at	10.1073	10.3582	10.2404	10.1421	10.2219	10.2971	10.2027	10.1348	10.1254	10.3574	10.2255	10.4094	10.1844	9.93287	10.2132	10.2386	10.1315
1415805_at	4.81607	4.86311	4.75158	4.78934	4.8564	4.99038	4.8112	4.94371	5.03319	4.8334	4.84982	4.90404	4.71093	4.82244	4.73519	4.90458	4.83204
1415806_at	9.03874	8.79745	8.95264	9.03944	8.93856	9.00633	9.03525	9.06102	9.07789	9.15775	9.1682	9.03152	8.973	8.9949	9.14743	9.11953	9.05636
1415807_s_at	8.9279	9.03075	8.93113	8.89621	8.8321	8.90971	9.06063	8.99317	9.05354	9.02823	9.1021	8.96425	9.04612	8.92579	8.9303	8.74973	8.94732
1415808_at	3.58178	3.69887	3.59826	3.48219	3.7122	3.7028	3.5995	3.70588	3.51769	3.63175	3.91329	3.97006	3.81766	3.95232	3.75131	3.72501	3.54581
1415809_at	3.67961	3.60876	3.62495	3.62495	3.90918	3.81431	3.60007	3.39597	3.7057	3.65235	3.64821	3.62495	3.53695	3.5829	3.42931	3.86439	3.75544
1415810_at	4.29947	4.27863	4.38279	4.41477	4.45963	4.19203	4.33419	4.42761	4.47418	4.41477	4.57672	4.46319	4.50335	4.47469	4.38457	4.347	4.47327
1415811_at	4.27591	4.48535	4.61745	4.32377	4.48538	4.27456	4.40081	4.20739	4.30356	4.40081	4.40081	4.22558	4.5516	4.64429	4.39712	4.40392	4.44955
1415812_at	10.0595	10.1331	10.0121	10.1065	10.047	10.3322	10.0165	9.99608	10.1221	10.1666	10.1182	10.1249	9.88531	9.87489	9.79485	9.99126	9.94044
1415813_at	10.2016	10.1691	10.147	10.2213	10.1809	10.2179	10.1877	10.082	10.1233	10.2567	9.98206	10.1979	10.2358	10.1271	10.2534	10.1953	10.2192
1415814_at	12.6913	12.6977	12.6502	12.6326	12.5805	12.5789	12.5734	12.6997	12.6855	12.6177	12.7206	12.6472	12.6886	12.5847	12.4351	12.6019	12.6213
1415815_at	3.93697	3.94835	3.98082	4.0194	4.14634	3.95775	4.03756	3.99057	4.03756	4.07693	4.07867	4.03756	4.10544	3.99707	4.068	4.18806	3.99107
1415816_at	11.3121	11.2633	11.3227	11.3056	11.3238	11.3628	11.2747	11.2913	11.3598	11.3673	11.2569	11.4658	11.4203	11.4034	11.315	11.3211	11.3312
1415817_s_at	11.264	11.2537	11.2563	11.3006	11.2199	11.3616	11.2245	11.248	11.2791	11.248	11.1334	11.3405	11.3006	11.2334	11.3018	11.2285	11.2379
1415818_at	9.51567	9.68987	9.3942	9.43405	9.49251	9.35571	9.49962	9.34216	9.35722	9.54581	9.45309	9.5974	9.38376	9.42489	9.57546	9.37218	9.40557
1415819_a_at	12.4375	12.437	12.3696	12.3315	12.2541	12.3052	12.3662	12.2959	12.2876	12.4347	12.3501	12.3226	12.3875	12.1204	12.307	12.3181	12.1538
1415820_x_at	10.2209	10.0191	10.2482	10.3352	9.92556	10.1174	10.1387	10.1745	10.1395	10.2215	9.98494	10.056	10.0744	9.90494	10.1409	10.0185	10.0663
1415821_at	12.4905	12.4322	12.6263	12.5351	12.3876	12.5098	12.5719	12.4137	12.4519	12.4759	12.3046	12.3477	12.4285	12.1902	12.5855	12.5093	12.4889
1415822_at	13.3761	13.333	13.3789	13.2908	13.2437	13.3263	13.2994	13.3936	13.337	13.2898	13.2799	13.2599	13.2059	13.1343	13.2035	13.2145	13.269
1415823_at	12.3206	12.5206	12.5498	12.4002	12.4569	12.6123	12.5077	12.3123	12.3764	12.5622	12.3493	12.4972	12.452	12.1898	12.4873	12.4746	12.4038
1415824_at	10.3047	10.3154	10.5933	10.1828	10.6263	10.8031	10.6487	10.4734	10.4092	10.6722	10.4382	10.5736	10.5925	9.83571	10.4269	10.6476	10.4645
1415825_s_at	9.85669	9.96409	9.98375	10.0073	9.87785	9.88955	9.90279	9.81587	9.72338	9.9867	9.87413	9.95123	9.88028	9.60626	9.84398	9.85708	9.81725
1415826_at	10.5887	11.0136	10.9696	11.0339	10.3717	10.6507	10.8037	10.4132	10.778	10.8859	10.6535	10.476	10.5408	10.891	11.0071	10.3776	10.7998
1415827_a_at	10.012	9.92043	10.0976	10.1003	10.1169	10.0737	10.0537	10.0629	10.1341	9.88851	10.0261	9.99404	10.147	10.1338	10.0154	10.0594	10.0306
1415828_a_at	9.31878	9.3907	9.51169	9.21113	9.50496	9.54957	9.48714	9.42445	9.5579	9.47416	9.39752	9.65974	9.62854	9.42966	9.42601	9.55009	9.51682
1415829_at	8.05792	8.03502	8.13179	8.32196	8.04273	8.25167	8.05819	8.17649	8.07473	8.07533	8.06841	7.96544	8.12211	7.97886	8.0227	8.08669	8.14172
1415830_at	8.60883	8.45717	8.59971	8.62786	8.56246	8.58383	8.62383	8.40302	8.52039	8.68222	8.50949	8.63832	8.72519	8.70461	8.73778	8.59647	8.62383
1415831_at	11.5967	11.475	11.5241	11.5434	11.5425	11.5251	11.5389	11.4813	11.6005	11.4726	11.3792	11.3812	11.4726	11.4084	11.4208	11.3625	11.4844
1415832_at	3.64503	3.83608	3.79496	3.9228	3.87211	3.90816	3.87211	3.69899	3.86025	3.87211	3.97969	3.84086	3.91962	3.84873	3.90716	3.87211	4.00198
1415833_x_at	13.9107	13.9747	13.9511	13.9548	13.9587	13.9727	13.8875	13.9755	13.9766	13.9026	13.8423	14.0148	14.0118	14.0491	13.9307	13.9542	13.9654
1415834_at	8.94941	9.22919	9.08068	8.99689	8.93212	9.23192	9.27159	8.77116	9.20122	9.38328	9.25567	9.19793	9.30842	9.27543	9.40244	9.22845	9.42864
1415835_at	4.08624	3.48975	3.77989	3.75064	3.96533	3.75665	3.7652	3.89242	3.63004	3.51256	3.75665	3.68174	3.99819	3.61155	3.7652	3.62667	3.62625
1415836_at	7.18463	6.95166	7.04663	7.07023	6.84321	6.99468	7.04116	7.2193	7.10103	6.93441	7.05129	7.08888	7.19363	7.04663	7.13158	7.1374	7.17528
1415837_at	3.71222	3.83772	3.98533	3.5905	4.00829	3.86916	3.90704	3.80477	3.9169	3.69159	3.86105	3.83772	3.76191	3.85445	3.80544	4.09505	3.7694
1415838_at	12.8922	12.9045	13.0069	12.9116	12.8714	12.9386	12.8809	12.8702	12.8956	12.9045	12.6542	12.8986	12.9777	12.7269	12.9946	12.9578	12.8917
1415839_a_at	11.0304	11.0211	11.1625	11.2251	11.1	11.1818	11.115	11.1969	11.187	11.0849	10.8064	11.103	11.054	10.9442	11.1084	11.1159	11.1686
1415840_at	10.4599	10.5735	10.4515	10.5123	10.4527	10.6003	10.554	10.3276	10.3124	10.5288	10.2458	10.5192	10.5056	10.4451	10.547	10.3803	10.5472
1415841_at	10.6505	10.632	10.5182	10.6277	10.4462	10.4207	10.4121	10.6108	10.5193	10.6318	10.5471	10.4668	10.507	10.4904	10.4155	10.3266	10.5079
1415842_at	8.3214	8.46144	8.49443	8.35394	8.4872	8.4572	8.51606	8.41439	8.44513	8.39773	8.49852	8.48112	8.62966	8.54809	8.52496	8.63964	8.55269
1415843_at	7.02587	6.76222	7.04682	6.71529	7.11606	7.1352	7.35297	7.20555	7.1185	7.20789	7.12253	7.23953	7.16199	6.95644	7.00245	7.22501	7.13855
1415844_at	9.335	9.19812	9.50105	9.43324	9.18981	9.33967	9.50828	9.2522	9.28394	9.2896	8.91145	9.40566	9.23225	9.24833	9.69883	9.34839	9.5467
1415845_at	10.2131	10.2567	10.1421	10.1785	10.2251	10.3453	10.2577	9.70796	10.0387	10.1017	9.91682	10.1692	10.2286	10.3101	10.3812	10.1278	10.3948
1415846_a_at	3.71565	3.73988	3.69248	3.6516	3.84876	3.59644	3.73944	3.66738	3.74249	3.71361	3.72227	3.82574	3.99922	3.7704	3.66674	3.82002	3.68689
1415847_at	4.24121	4.25715	4.39947	4.30451	4.23936	4.30286	4.25006	4.30286	4.30286	4.30286	4.20582	4.41525	4.26964	4.30286	4.42361	4.3625	4.30883
1415848_at	6.37125	6.47082	6.67109	6.50669	6.81196	6.64701	6.66187	6.68988	6.74825	6.57138	6.87722	6.8156	6.76347	6.90568	6.68054	6.89567	6.84605
1415849_s_at	12.9355	12.8284	12.7256	12.9391	12.8015	12.9033	12.7537	12.8336	12.7563	12.8578	12.6958	12.9382	12.7512	12.7635	12.6877	12.5929	12.8687
1415850_at	9.43435	9.42982	9.26079	9.43151	9.2093	9.30921	9.29784	9.29481	9.27424	9.41001	9.32737	9.44531	9.31452	9.24705	9.29662	9.16344	9.2819
1415851_a_at	10.0692	9.97111	10.0639	9.99683	9.96154	10.0415	10.0458	10.3484	10.2363	10.0338	10.6514	10.0267	10.1112	10.6649	9.9353	10.0119	10.0812
1415852_at	10.1439	10.1439	10.1155	10.1943	10.0735	10.1783	10.1438	10.0864	10.2786	10.1501	10.1394	10.1115	10.208	10.0553	9.9854	10.1264	10.1354
1415853_at	8.02011	8.17727	8.08475	8.17811	8.2431	8.21671	8.2643	8.02856	8.10461	8.18369	8.1593	8.37908	8.41959	8.22725	8.27777	8.27236	8.22579
1415854_at	4.36127	4.53306	4.44539	4.15245	4.35827	4.66877	4.33505	4.34686	4.08587	4.23118	4.31715	4.81128	4.75209	4.39844	4.50439	4.40016	4.71724
1415855_at	9.12083	8.78422	8.83874	9.13354	8.93373	9.00078	8.91811	9.19422	8.9169	8.81795	8.5445	9.16726	8.94498	8.91862	9.07842	8.79485	9.11749
1415856_at	8.50081	8.31436	8.24054	8.45905	8.15914	8.42628	8.27503	8.45764	8.55102	8.38926	8.00488	8.60449	8.28221	8.46023	8.05058	8.58642	8.35133
1415857_at	8.84481	8.71983	8.70957	8.92376	8.69931	8.82618	8.6608	8.79805	8.99445	8.82781	8.57188	9.21593	8.79074	8.92762	8.5697	8.90194	8.85377
1415858_at	11.38	11.3211	11.326	11.3751	11.3299	11.4026	11.3158	11.2768	11.4518	11.4199	11.2246	11.3164	11.2821	11.1909	11.2319	11.2928	11.3211
1415859_at	9.73742	9.72177	9.78963	9.75653	9.81249	9.87583	9.83663	9.84255	9.97786	9.93279	9.71907	9.73947	9.73569	9.51823	9.91153	9.73957	9.88769
1415860_at	9.29055	9.31026	9.34324	9.42389	9.35374	9.53496	9.38818	9.39932	9.34894	9.21103	8.95461	9.25175	9.3225	9.21116	9.27032	9.17572	9.44076
1415861_at	4.1271	4.01444	3.95999	3.78766	4.26293	3.80122	4.08274	3.98812	4.23571	3.87353	4.07599	3.91513	3.99819	3.91694	4.26469	3.86029	3.95422
1415862_at	4.27249	4.28338	4.19386	3.97304	4.3366	4.26758	4.38419	4.40598	4.43155	4.30291	4.07022	4.34346	4.53903	4.40206	4.25789	4.22495	4.27249
1415863_at	11.8016	11.7891	11.8577	11.919	11.8162	11.8605	11.9044	11.6923	11.7076	11.8254	11.5871	11.7606	11.8254	11.6714	11.9634	11.8254	11.9332
1415864_at	8.70019	8.79924	9.08886	9.04211	8.75287	9.19924	9.15349	9.00903	9.1155	8.92358	8.75807	8.94842	9.12034	8.92276	8.89134	8.80209	8.87118
1415865_s_at	9.59872	9.56616	9.63079	9.67504	9.62467	9.69726	9.61921	9.65898	9.68866	9.55084	9.54365	9.71808	9.67264	9.53534	9.54062	9.59599	9.58698
1415866_at	6.59062	6.48298	6.40164	6.62604	6.53997	6.52755	6.57131	6.48959	6.35929	6.79047	6.50284	6.67947	6.77475	6.5112	6.39326	6.55217	6.41124
1415867_at	10.9512	10.9029	10.9746	10.9988	10.9692	10.9692	10.9779	10.9295	11.0326	10.9581	10.9164	10.9699	11.0767	11.0369	10.9692	10.9596	11.0491
1415868_at	5.88656	6.07383	5.71018	5.71309	5.80594	6.05168	5.83597	5.6316	5.6395	6.04437	5.864	6.0633	6.03818	5.71434	5.82699	5.69439	6.08022
1415869_a_at	10.7213	10.7774	10.5411	10.6632	10.3892	10.5899	10.5405	10.5069	10.4424	10.6261	10.5405	10.5602	10.5057	10.2403	10.4161	10.536	10.4943
1415870_at	9.92751	9.8856	9.80386	9.93136	9.86047	9.85168	9.85989	9.79547	9.86144	9.83684	9.63428	9.84812	9.90566	9.95841	9.85168	9.77106	9.89233
1415871_at	4.88545	4.91099	4.7484	5.07421	4.94456	5.07673	4.6636	4.89674	5.38305	4.68029	4.83139	5.08231	4.83473	5.21669	4.91099	5.06624	4.91099
1415872_at	11.4671	11.5893	11.4075	11.4467	11.3488	11.414	11.335	11.3346	11.3906	11.6526	11.385	11.5835	11.5999	11.5726	11.493	11.4621	11.5938
1415873_a_at	10.8965	10.9742	10.8737	10.9477	10.9263	10.9093	10.8525	10.6759	10.6874	11.0299	10.7342	10.9409	10.9805	10.7751	10.9655	10.8973	10.8829
1415874_at	8.1837	8.25374	8.0194	8.0769	8.22915	8.05895	8.29382	8.22843	7.99794	8.22296	8.31488	8.06792	8.03928	8.08504	8.10387	8.20638	8.09682
1415875_at	3.91553	3.73372	3.94165	4.04001	4.30584	3.86527	4.00555	3.81816	3.88809	3.92629	3.77852	3.86155	4.01097	4.16378	4.01152	4.26004	3.94165
1415876_a_at	12.3347	12.2983	12.3345	12.4066	12.4536	12.4019	12.397	12.3339	12.3623	12.3156	12.2115	12.3734	12.462	12.3544	12.4101	12.399	12.3699
1415877_at	8.62455	8.42449	8.24117	8.45416	8.35084	8.27468	8.54659	8.50674	8.44352	8.44326	8.33708	8.42505	8.13985	8.07085	8.22388	8.21915	8.46742
1415878_at	7.82141	7.86756	7.74324	7.88655	7.76758	7.8667	7.90878	7.96706	7.90072	7.85197	7.64779	7.71401	7.7792	7.88865	7.67205	7.75731	7.79414
1415879_a_at	12.9887	13.0081	12.9996	13.0639	13.1035	13.1101	13.0413	12.9863	13.0744	13.0279	12.8336	13.13	13.0708	13.0108	13.0587	13.0361	13.0097
1415880_a_at	12.0052	11.9353	11.8871	11.943	11.9211	11.9722	11.9957	11.8593	11.8501	11.8993	11.9201	11.9015	11.9263	11.8468	11.8029	11.9211	11.9363
1415881_at	11.7642	11.737	11.8083	11.799	11.7117	11.8003	11.8034	11.6916	11.7678	11.7777	11.5308	11.7577	11.6913	11.7103	11.7741	11.7213	11.9226
1415882_at	11.9265	11.8674	11.931	11.8961	11.9925	12.0241	11.9972	11.8848	11.9921	12.0061	11.8168	12.0889	11.9265	11.93	11.9305	11.9775	11.992
1415883_a_at	5.06616	4.9719	4.72389	4.95252	5.01401	4.82146	5.02098	4.96705	5.07289	5.09594	5.04535	5.26217	4.83473	5.14545	4.92869	4.64796	4.92329
1415884_at	6.65836	6.85125	6.86976	6.83989	7.10159	6.95775	6.91396	6.91396	6.97627	6.68101	7.09165	7.16891	6.81592	6.94252	7.07657	6.8278	7.00139
1415885_at	12.9991	12.9394	12.9923	12.9099	12.7886	12.8893	12.9268	12.8792	12.846	12.9946	12.8792	12.8598	12.8092	12.6573	12.9111	12.8161	12.8737
1415886_at	7.64335	7.62205	7.5655	7.57249	7.63033	7.66085	7.57933	7.41178	7.46934	7.60831	7.56852	7.62271	7.48159	7.41855	7.55832	7.49199	7.41604
1415887_at	11.1033	11.084	10.9714	11.0023	10.9925	11.0248	11.0279	10.9862	11.0641	11.095	11.0569	11.0777	11.0909	10.9534	11.0332	11.0397	11.0494
1415888_at	9.41655	9.75367	9.60456	9.64082	9.29642	9.49355	9.39117	9.33119	9.35927	9.62187	9.52256	9.5747	9.50916	9.52256	9.66432	9.33437	9.60311
1415889_a_at	10.8455	10.8622	10.9958	11.0728	10.8337	11.0342	10.9437	10.8915	10.9738	10.9175	10.7341	10.9911	10.8902	11.0465	11.163	11.0722	11.142
1415890_at	10.7534	10.7246	10.7688	10.8479	10.5309	10.7674	10.7149	10.6363	10.6668	10.7676	10.6545	10.6829	10.7935	10.4858	10.6476	10.638	10.7916
1415891_at	11.3688	11.4128	11.4785	11.4345	11.4496	11.5113	11.4232	11.2253	11.3279	11.5014	11.2813	11.388	11.5173	11.4374	11.4975	11.5542	11.4812
1415892_at	7.58685	7.76786	7.89551	7.61699	7.52092	7.60135	7.75699	7.66075	7.61699	7.60633	7.4721	7.48763	7.7846	7.48167	7.74019	7.42935	7.60702
1415893_at	6.83697	6.76197	6.98645	6.60573	6.97342	7.06812	6.8728	6.98237	6.95278	6.77265	6.8734	6.76547	6.99689	6.50022	6.6308	6.8893	6.91996
1415894_at	7.58885	7.91249	7.75644	8.20929	7.77548	7.81913	7.6729	7.68373	8.30836	7.72675	7.72114	8.26356	7.50275	8.28473	7.63119	8.2323	7.71436
1415895_at	13.873	13.8722	13.8627	13.8272	13.8989	13.912	13.8989	13.9516	13.9573	13.8428	13.9853	13.9236	13.9453	13.9041	13.7687	13.8783	13.8989
1415896_x_at	13.8974	13.914	13.9027	13.8758	13.9142	13.9434	13.9036	13.9599	14.014	13.9003	13.9585	14.0029	13.9258	13.9187	13.8092	13.9201	13.9366
1415897_a_at	8.62635	8.69985	8.67952	8.78554	8.68127	9.03719	8.62985	8.80169	8.99431	8.57742	8.57221	8.89261	8.81923	8.88736	8.52575	8.8732	8.82674
1415898_at	4.45712	4.21042	4.37596	4.20682	3.87651	4.34952	4.07645	4.29733	4.22569	4.26981	4.17746	4.26583	4.10565	4.46541	4.10773	4.29144	4.33882
1415899_at	7.64457	7.5979	7.6403	7.43	7.27527	7.69485	7.75033	7.47562	7.56331	7.78163	7.74673	7.65578	7.59899	7.68265	7.65555	7.76322	7.81419
1415900_a_at	8.40088	8.43407	8.39845	8.13576	8.17844	8.36145	8.47126	8.20841	8.33441	8.57202	8.23582	8.2783	8.3331	8.08537	8.29603	8.3077	8.41831
1415901_at	9.20733	9.19885	9.12872	9.13309	9.12366	9.09572	9.10014	9.25739	9.19885	9.18879	9.32713	9.3319	9.26194	9.34526	9.24335	9.19885	9.24678
1415902_at	4.49774	4.23024	4.29311	4.33917	4.49779	4.61979	4.45908	4.51174	4.23294	4.45457	4.49718	4.57004	4.45457	4.47981	4.29947	4.49359	4.2422
1415903_at	9.13308	8.93723	8.74083	8.88338	8.77071	8.52016	8.68813	8.95065	8.77291	8.78791	9.03663	8.7843	8.69731	8.72892	8.78791	8.72004	8.93953
1415904_at	10.436	10.5016	10.5492	10.5351	10.6005	10.4654	10.6419	10.5223	10.6342	10.3649	10.4006	10.3412	10.2336	10.2511	10.3408	10.1488	10.2569
1415905_at	4.5792	4.67655	4.66035	4.60364	4.60364	4.49909	4.60364	4.56577	4.60321	4.6502	4.619	4.56494	4.47558	4.85421	4.49838	4.80512	4.5954
1415906_at	13.9006	13.9249	13.9917	13.982	13.9988	14.0219	13.9677	13.9212	13.9741	13.9434	13.8927	13.847	14.0083	13.9188	14.0753	14.0248	13.9457
1415907_at	8.30816	8.32966	8.26951	8.37304	8.46276	8.45685	8.25149	8.3284	8.3746	8.57282	8.51905	8.50724	8.49992	8.44113	8.28293	8.47197	8.41779
1415908_at	10.5504	10.4717	10.6476	10.7314	10.382	10.5403	10.7147	10.5766	10.4838	10.5924	10.219	10.5403	10.1627	9.99874	10.7743	10.5086	10.5895
1415909_at	9.87836	9.64327	9.76064	9.81084	9.77955	9.83921	9.82627	9.81475	9.81649	9.91722	9.74075	9.89221	9.77898	9.86087	9.81475	9.78562	9.98254
1415910_s_at	8.81776	8.7661	8.799	8.69988	8.92651	8.97903	8.86743	8.84532	8.86628	8.84234	8.90002	8.75432	8.84445	8.88674	8.76376	8.77504	8.75239
1415911_at	11.3673	11.2993	11.1783	11.3483	11.2361	11.2508	11.2746	11.1331	11.2956	11.2853	11.1261	11.3796	11.3359	11.3826	11.3599	11.1421	11.4106
1415912_a_at	11.7211	11.7894	11.9713	11.8977	11.9918	11.9356	12.0316	12.0564	11.9955	11.881	11.7857	11.9251	11.9828	11.8079	11.8265	11.9086	11.9089
1415913_at	5.40047	5.46784	5.52193	5.49988	5.31302	5.2797	5.48902	5.41679	5.43732	5.68931	5.78831	5.50678	5.9779	5.50291	5.6914	5.55712	5.47813
1415914_at	11.0268	11.1311	11.1249	11.0354	11.0034	11.1098	11.0919	10.9853	11.1103	11.0301	10.9981	10.9147	11.0861	10.9055	10.9929	10.9966	10.998
1415915_at	11.0268	11.0528	11.0366	11.1319	11.0777	11.1257	10.9473	10.9564	11.0387	10.983	10.8661	10.932	11.1057	10.9562	11.0662	10.9761	10.9881
1415916_a_at	9.67354	9.47031	9.47533	9.48456	9.35041	9.40126	9.40196	9.53062	9.63898	9.4656	9.55921	9.51552	9.4423	9.55297	9.28403	9.4966	9.50255
1415917_at	8.51585	8.52082	8.50223	8.58409	8.48006	8.5362	8.36645	8.51646	8.50977	8.532	8.53122	8.51646	8.62755	8.53083	8.38378	8.51646	8.48176
1415918_a_at	12.6848	12.7791	12.67	12.6581	12.6609	12.7548	12.6579	12.5836	12.7553	12.676	12.4866	12.7807	12.7582	12.6511	12.6407	12.7481	12.6169
1415919_at	11.2743	11.3488	11.2752	11.294	11.3374	11.2687	11.324	11.0762	11.145	11.3422	11.2287	11.2053	11.3657	11.0442	11.3314	11.2874	11.1708
1415920_at	11.3871	11.3812	11.4661	11.4573	11.3314	11.4338	11.5138	11.3726	11.4132	11.4908	11.2746	11.3669	11.4116	11.1413	11.3587	11.3308	11.4286
1415921_a_at	7.39596	7.20659	7.50985	7.25643	7.51926	7.36235	7.33533	7.48784	7.43673	7.36235	7.36235	7.52032	7.3818	7.27558	7.33994	7.46678	7.36235
1415922_s_at	10.5715	10.7714	10.8212	10.7483	10.5953	10.6943	10.8122	10.5077	10.7428	10.6155	10.6101	10.5144	10.6257	10.3747	10.5859	10.4847	10.6864
1415923_at	12.3933	12.3858	12.0193	12.4647	12.2356	12.4397	12.4793	12.385	12.4711	12.3977	12.1683	12.4557	12.3321	12.0742	11.8968	12.3374	12.0429
1415924_at	3.69874	3.90407	3.83228	3.7135	3.87513	3.81301	3.83228	4.03006	4.08573	3.61412	3.90777	3.86603	4.04852	3.93613	3.77466	3.87785	3.98374
1415925_a_at	8.77639	8.67648	8.73331	8.84336	8.74845	8.79966	8.75286	8.55623	8.63801	8.77348	8.74687	8.83163	8.77639	8.57085	8.55557	8.69045	8.84206
1415926_at	9.25145	9.10235	9.2722	9.25634	9.26338	9.33016	9.23158	9.14751	9.04606	9.22242	9.08332	9.3222	9.2775	9.07178	9.21519	9.15702	9.29246
1415927_at	5.22259	5.07979	5.10154	5.22259	5.39841	5.25729	5.22259	5.18581	5.34347	5.04489	5.19773	5.52106	5.13937	5.20383	5.20334	5.33647	5.2107
1415928_a_at	11.5976	11.4623	11.6224	11.6167	11.4929	11.5546	11.758	11.7277	11.6514	11.6211	11.4829	11.4691	11.57	11.4571	11.6654	11.6336	11.7034
1415929_at	12.002	11.8949	11.9533	11.9891	11.9203	11.9639	12.0554	11.918	11.9435	12.1631	12.0037	12.1908	11.9976	11.93	11.9567	12.0415	12.0797
1415930_a_at	11.5714	11.4999	11.7267	11.6901	11.6123	11.705	11.748	11.6654	11.6518	11.797	11.4897	11.7074	11.7036	11.4765	11.8552	11.7368	11.6797
1415931_at	4.05337	4.15461	4.40408	4.20906	4.37907	4.51104	4.18389	4.38927	4.60472	4.2393	4.52201	4.51388	4.37907	4.54057	4.19731	4.6552	4.63237
1415932_x_at	11.2357	11.3043	11.2015	11.2591	11.2614	11.2511	11.3001	11.1055	11.1633	11.2245	11.2646	11.2015	11.2989	11.0643	11.0741	11.1467	11.0804
1415933_a_at	12.3596	12.2611	12.3346	12.4248	12.2487	12.4013	12.3976	12.4084	12.3216	12.3436	12.1283	12.2859	12.2751	11.9868	12.3593	12.3715	12.4098
1415934_at	10.0255	10.0458	10.0869	10.0609	9.9923	10.1314	10.0445	9.99127	10.0685	10.1327	10.0338	10.1337	10.2045	10.0642	10.0642	9.97397	10.0642
1415935_at	8.67664	8.55172	8.56302	8.62898	8.56023	8.30895	8.55995	8.30002	8.53099	8.99556	8.95826	8.7933	8.88456	8.51253	8.96841	8.99337	8.72553
1415936_at	8.32571	8.06459	8.2427	8.28305	8.16261	8.26959	8.26959	8.30403	8.23521	8.29632	8.38419	8.22275	8.22562	8.30156	8.22935	8.34683	8.34051
1415937_s_at	7.69975	7.94949	7.97698	8.01625	7.53119	7.90262	7.77774	7.7557	7.65412	8.06198	7.69681	7.78878	7.99671	7.3917	7.80749	7.63676	7.7076
1415938_at	4.06631	4.23707	4.42142	4.28841	4.30563	4.26663	4.45216	4.29659	4.24461	4.33912	4.38327	4.5533	4.53647	4.35443	3.95275	4.22426	4.16431
1415939_at	7.54761	7.77948	6.8336	8.29582	7.955	8.98779	7.19635	8.76571	8.96909	7.66705	7.99545	8.25885	7.30694	8.2196	7.74203	8.31264	7.99545
1415940_at	10.59	10.5867	10.5873	10.7268	10.6547	10.5868	10.6298	10.5966	10.5888	10.5536	10.525	10.6154	10.6953	10.6265	10.5208	10.6028	10.6507
1415941_s_at	8.80444	8.80459	8.91431	9.01221	8.88659	8.89951	8.84248	8.99087	8.98388	8.89656	8.62164	8.8729	8.83714	8.71447	8.95146	8.889	8.88709
1415942_at	13.1052	13.1216	13.1578	13.1697	13.2246	13.226	13.1424	13.1893	13.2302	13.1723	13.0735	13.3097	13.2762	13.1488	13.2733	13.247	13.2252
1415943_at	4.88545	4.93557	4.76816	5.22455	5.06465	5.27917	5.23238	5.0653	5.30587	4.98828	5.13503	4.79986	4.97271	5.13969	5.13285	5.18621	5.06465
1415944_at	5.47464	5.59574	5.69332	5.61095	5.85192	5.73359	5.66939	5.60019	5.85343	5.59028	5.82544	5.87937	5.68911	5.87556	5.67636	5.78326	5.91786
1415945_at	5.30201	4.95049	4.97258	4.80589	5.01347	5.11483	5.03613	4.92764	4.75419	5.20191	5.04235	4.97258	4.85917	5.09464	4.89508	4.9933	5.11638
1415946_at	10.2455	10.2668	10.2164	10.2982	10.2366	10.2843	10.2771	10.1104	10.11	10.2748	10.1901	10.1489	10.2721	10.0011	10.1224	10.2016	10.1131
1415947_at	8.23919	8.13839	8.24317	8.3725	8.3777	8.40037	8.28097	8.31975	8.32311	8.29928	8.16668	8.31702	8.43034	8.28222	8.23199	8.38094	8.22978
1415948_at	8.61163	8.51838	8.53355	8.70819	8.62757	8.69334	8.62883	8.59517	8.57807	8.48223	8.14737	8.43617	8.48804	8.37256	8.49451	8.46901	8.48637
1415949_at	13.5756	13.513	13.7477	13.6827	13.5061	13.5881	13.7507	13.6741	13.5983	13.6271	13.4259	13.56	13.5674	13.3915	13.724	13.5835	13.607
1415950_a_at	13.1312	13.2244	13.1966	13.1963	13.2612	13.2423	13.1758	13.1199	13.1895	13.2916	13.1644	13.2698	13.2856	13.1095	13.2949	13.2814	13.1794
1415951_at	6.7875	6.8476	6.7875	6.72114	6.84872	7.01323	6.75428	6.90733	6.98903	6.61064	6.69215	6.7875	6.73987	6.7875	6.79947	6.74598	6.62102
1415952_at	10.5042	10.5889	10.3736	10.423	10.2764	10.2572	10.3418	10.2039	10.2227	10.4265	10.3643	10.5054	10.4197	10.0057	10.2696	10.3	10.2197
1415953_s_at	8.19501	8.31563	8.36048	8.06649	8.38396	8.28575	8.25197	8.29578	8.39568	8.33939	8.5044	8.58525	8.20737	8.29424	8.33152	8.44211	8.26994
1415954_at	3.56659	3.4114	3.55367	3.60156	3.55209	3.75831	3.53325	3.75431	3.57321	3.57065	3.66764	3.60021	3.60426	3.77297	3.79894	3.66224	3.63133
1415955_x_at	7.00548	7.14677	7.26756	7.14538	7.07825	7.18404	7.13762	7.17218	7.15227	7.10318	7.32219	7.15167	7.17799	7.12678	7.03534	7.15167	7.12091
1415956_a_at	10.1756	10.5153	10.406	10.2794	10.5112	10.506	10.4336	10.1394	10.2436	10.3556	10.1688	10.3787	10.358	10.2926	10.4804	10.3838	10.3316
1415957_a_at	10.7751	10.671	10.8686	10.8536	10.9719	10.9996	10.9264	10.754	10.9341	10.9484	10.7299	10.8538	10.8325	10.61	10.8185	10.8706	10.6944
1415958_at	6.47412	6.46309	6.33464	6.26229	6.61869	6.49501	6.2354	6.58233	6.68592	6.32694	6.5386	6.67599	6.51121	6.65368	6.44381	6.65811	6.45304
1415959_at	5.6284	5.94802	6.02739	5.77575	6.14025	5.89021	5.78108	5.90936	5.98644	5.77867	6.22389	6.11853	5.82632	5.90936	5.74974	6.18086	5.88329
1415960_at	4.68393	4.67512	4.72765	4.64642	5.13543	4.82759	4.70762	4.78654	4.86409	4.62973	4.96665	5.10589	4.86383	5.05829	4.92299	4.92218	4.8853
1415961_at	13.041	12.9613	12.9996	12.969	12.9615	12.9615	12.9394	12.9687	13.0739	12.9602	12.9919	12.9242	12.9349	12.8902	12.8977	12.9039	12.9461
1415962_at	11.2281	11.2504	11.2126	11.4155	11.4044	11.3661	11.2815	11.2605	11.3029	11.2847	11.0942	11.4042	11.3026	11.341	11.3561	11.403	11.3334
1415963_at	10.7879	10.8503	11.1825	11.0161	10.7886	11.0099	10.9416	10.9961	10.9528	10.9039	10.5965	10.6724	10.7909	10.6332	11.1223	10.9109	10.9925
1415964_at	11.1661	11.0451	11.0114	11.1021	11.068	11.0646	11.0369	11.0211	10.9804	10.9485	10.925	11.1172	10.8343	10.8329	11.0167	10.8869	11.0593
1415965_at	7.45732	7.45259	7.95139	7.24753	7.35157	7.76335	7.70306	7.33206	7.53072	7.45732	7.10315	7.46055	7.613	6.90583	7.47248	7.46164	7.62488
1415966_a_at	11.6319	11.6055	11.5775	11.6476	11.6056	11.5996	11.6061	11.587	11.7034	11.6129	11.4548	11.5652	11.5918	11.444	11.4045	11.5396	11.52
1415967_at	11.6913	11.7493	11.7485	11.7959	11.8245	11.8605	11.77	11.7323	11.8104	11.7417	11.6926	11.7857	11.823	11.6904	11.691	11.7891	11.7086
1415968_a_at	5.37267	5.54477	5.41281	5.56123	5.89021	5.65791	5.657	5.51642	5.70698	5.52828	5.91548	5.87059	5.37693	5.70309	5.657	5.88273	5.72964
1415969_s_at	3.73797	3.72554	3.58132	3.80116	3.77152	3.78254	3.70041	3.75123	3.81066	3.60323	3.75123	3.85108	3.57702	3.84412	3.67966	3.75123	3.75306
1415970_at	13.1757	13.2252	13.2879	13.2567	13.3446	13.299	13.3146	13.3865	13.399	13.2328	13.2228	13.3298	13.3286	13.3873	13.2497	13.2821	13.299
1415971_at	11.044	10.9555	10.8641	10.9522	10.7207	10.9124	10.8764	11.0124	10.8327	10.9801	10.7346	10.9729	10.7051	10.5498	10.8749	10.9007	10.9549
1415972_at	9.67347	9.85829	9.85086	9.70379	9.66202	9.79202	9.69997	9.73929	9.69997	9.8545	9.54665	9.48492	9.60261	9.40391	9.6767	9.73754	9.68681
1415973_at	10.8927	10.9512	10.7936	10.8994	10.76	10.8352	10.8385	10.806	10.7578	10.8933	10.6304	10.8553	10.6019	10.5223	10.6994	10.7967	10.806
1415974_at	9.15626	9.15043	9.10678	9.12188	9.03384	9.16248	9.11795	8.83289	9.04565	9.13715	9.00299	8.99609	9.0989	8.99476	9.17335	8.91727	8.96904
1415975_at	8.84303	9.03128	9.11271	9.05482	9.02925	9.11749	9.00369	8.89189	8.91146	9.21634	9.02453	9.08749	9.08929	9.04329	8.8177	9.12965	8.99765
1415976_a_at	7.73846	7.79567	8.06494	7.77134	8.10378	8.12409	8.06826	7.95942	7.93774	8.08306	8.04687	8.14553	8.08077	7.91023	7.92001	8.02543	8.00853
1415977_at	8.28253	8.08973	7.94016	8.31482	8.18339	8.53308	8.28253	8.4243	8.4668	8.18022	8.31318	8.42431	8.12849	8.22001	8.07662	8.40945	8.24022
1415978_at	9.51956	9.58033	9.4349	9.47171	9.43102	9.53819	9.52836	9.44675	9.42037	9.58041	9.29084	9.37394	9.50376	9.37373	9.46958	9.3514	9.3206
1415979_x_at	12.1259	12.1222	12.3152	12.2933	12.3865	12.3208	12.3446	12.3153	12.3234	12.2449	12.1155	12.254	12.348	12.2498	12.275	12.3477	12.2853
1415980_at	11.4672	11.4165	11.4202	11.4411	11.5563	11.4936	11.5538	11.5807	11.5554	11.4129	11.3835	11.4662	11.4407	11.4026	11.3915	11.4581	11.4633
1415981_at	9.58345	9.6773	9.6667	9.71458	9.43397	9.5953	9.73127	9.50222	9.39211	9.64643	9.23841	9.36348	9.45307	9.14822	9.67861	9.60704	9.68357
1415982_at	8.37511	8.6236	8.42304	8.41866	8.3565	8.46318	8.45232	8.24349	8.28361	8.43247	8.18198	8.10124	8.2614	8.24829	8.55303	8.38482	8.37058
1415983_at	6.48749	6.60259	6.58868	6.73845	6.47319	6.95094	6.62377	6.56311	6.60691	6.36005	6.56504	6.61935	6.51668	6.69986	6.57156	6.16203	6.71259
1415984_at	9.64339	9.74575	9.72796	9.75721	9.71243	9.76789	9.74674	9.68183	9.79245	9.78328	9.62373	9.86295	9.89052	9.91137	9.73323	9.68223	9.83412
1415985_at	10.3949	10.4513	10.281	10.3842	10.2672	10.2673	10.2999	10.1755	10.256	10.3663	10.251	10.3096	10.3577	10.1672	10.2827	10.2663	10.3429
1415986_at	11.2582	11.4575	11.3474	11.3298	11.4028	11.4292	11.2981	10.9342	11.131	11.3344	11.1587	11.3022	11.3128	11.2174	11.4384	11.2157	11.3455
1415987_at	9.504	9.43595	9.32744	9.39557	9.34517	9.43035	9.34311	9.42456	9.37587	9.43733	9.43601	9.56867	9.55458	9.43035	9.40384	9.48649	9.39246
1415988_at	7.14135	6.76402	7.23073	6.86468	7.10629	7.27187	7.0968	7.18941	7.02581	7.13522	7.05619	7.21117	7.35558	6.31206	6.91477	7.18704	7.28194
1415989_at	8.22946	8.42609	8.26124	8.36104	8.45086	8.54433	8.48862	8.42609	8.60543	8.34188	8.14698	8.53703	8.37664	8.61924	8.37392	8.42706	8.39151
1415990_at	12.1129	12.164	12.099	12.099	12.0976	12.166	12.1645	12.0339	12.1445	12.1202	11.9973	12.099	12.1707	12.0827	12.0624	12.1002	12.1034
1415991_a_at	12.0646	11.9419	11.8865	11.9229	11.9875	11.8456	11.9556	11.9375	11.9843	11.9225	11.9915	11.9336	11.7237	11.8322	11.6864	11.8657	11.8727
1415992_at	7.69933	7.79892	7.68497	7.77648	7.62629	7.68008	7.68497	7.70137	7.68787	7.77794	7.66404	7.70429	7.68	7.68497	7.62416	7.6558	7.6341
1415993_at	10.4122	10.2432	10.1223	10.2693	10.0613	10.2558	10.1647	10.1346	10.0095	10.2084	9.91093	10.1454	9.94797	9.85489	10.0023	9.92748	10.0563
1415994_at	5.25442	4.8858	5.14418	5.11944	5.12292	5.12425	5.03498	5.18887	5.12545	4.74509	5.22531	5.27534	4.97284	5.29084	5.27487	5.27984	4.99893
1415995_at	6.92393	6.70664	6.87751	7.08519	6.83161	7.10845	6.89276	6.97733	7.05541	7.10725	6.99017	7.20837	7.35532	7.07636	6.98886	7.09882	6.90608
1415996_at	8.35204	8.2832	8.31432	8.15656	8.24217	8.40221	8.22154	8.63806	8.91295	8.63711	8.81119	8.43257	8.36266	8.78881	8.20574	8.79161	8.46363
1415997_at	8.10956	8.03027	8.12313	7.67204	8.13903	8.29122	7.99412	8.23003	8.59133	8.43602	8.46091	8.30683	8.14068	8.28817	8.01912	8.724	8.22635
1415998_at	12.4167	12.5552	12.4825	12.3995	12.4156	12.4148	12.5001	12.1802	12.3892	12.3919	12.2692	12.3024	12.527	12.3016	12.4626	12.2667	12.431
1415999_at	9.58422	9.65308	9.56868	9.65125	9.55402	9.56868	9.65287	9.63958	9.62824	9.52875	9.64499	9.52692	9.56787	9.51081	9.42253	9.44056	9.51485
1416000_a_at	11.7214	11.7194	11.8192	11.9259	11.962	11.9221	11.9171	11.8664	11.8667	11.7706	11.7505	11.8137	11.8886	11.7903	11.8619	11.8262	11.8628
1416001_a_at	9.5822	9.66094	9.71316	9.38671	9.71316	9.71962	9.65527	9.69126	9.71955	9.72675	9.99264	9.78793	9.72335	9.76427	9.71501	9.83053	9.73548
1416002_x_at	7.72895	8.05357	8.02699	7.83536	7.52503	7.78574	7.54161	7.83674	7.77954	7.89695	7.76972	7.76693	8.24365	7.78338	7.89028	7.77257	7.80519
1416003_at	10.3062	10.1381	10.3975	10.3081	10.034	10.3034	10.3681	10.1363	9.97456	10.3106	10.1683	10.2364	10.0135	9.65875	10.1683	10.1776	10.3704
1416004_at	13.2903	13.393	13.3528	13.2514	13.2631	13.3066	13.2974	13.1868	13.2782	13.341	13.2368	13.3272	13.3334	13.1927	13.3812	13.2626	13.315
1416005_at	10.7542	10.639	10.7102	10.8313	10.7351	10.8182	10.7604	10.7554	10.7527	10.7202	10.4945	10.6445	10.7204	10.7252	10.7631	10.739	10.7519
1416006_at	8.26815	8.1451	8.31217	8.46289	8.54096	8.48058	8.47688	8.64267	8.57301	8.2713	8.40717	8.3218	8.51278	8.50677	8.4007	8.41942	8.33494
1416007_at	10.2941	10.1733	9.92883	10.1789	9.82854	10.0959	9.96048	10.025	9.79223	10.11	9.69648	9.90679	9.97545	9.75259	9.85727	9.84355	10.0022
1416008_at	9.70219	9.58616	9.41332	9.66219	9.36011	9.65306	9.49608	9.60431	9.33907	9.51159	9.15069	9.48964	9.47175	9.15183	9.33201	9.39351	9.68017
1416009_at	12.0418	12.0713	12.1297	12.1416	12.0496	12.1002	12.1329	11.893	12.0144	12.0758	11.8593	12.0768	12.1408	11.9117	12.1239	12.0767	12.1309
1416010_a_at	8.55986	8.33021	8.35918	8.51636	8.23882	8.17512	8.54792	8.46556	8.29258	8.53452	8.29982	8.22851	8.3873	8.05992	8.43949	8.36021	8.43576
1416011_x_at	9.19457	9.13899	9.13899	9.10302	9.14209	9.03361	9.35019	9.15432	9.09622	9.2086	9.12854	9.03628	9.05197	8.75178	9.29894	9.26254	9.01599
1416012_at	7.64576	7.4496	7.42304	7.51436	7.49246	7.32227	7.52723	7.33702	7.51258	7.64605	7.60219	7.495	7.58021	7.34575	7.40093	7.59526	7.43765
1416013_at	11.981	12.0311	11.9491	11.9713	11.9783	12.0803	12.0522	11.9653	11.9501	11.9323	11.8294	11.8086	11.9409	11.6261	11.9327	11.8408	11.7226
1416014_at	10.2851	10.2162	10.3537	10.4692	10.4246	10.2914	10.2537	10.2317	10.2396	10.2109	9.97579	10.2449	10.2738	10.2795	10.4346	10.2221	10.3336
1416015_s_at	10.1265	10.1202	10.1813	10.3576	10.2124	10.2182	10.2159	10.1411	10.1163	10.1681	9.7766	10.1291	10.0993	10.0661	10.2131	10.0693	10.1524
1416016_at	6.37742	6.4521	6.51155	6.17297	6.42387	6.34688	6.37742	6.36466	6.51221	6.08777	6.35651	6.39663	6.37742	6.42071	6.39431	6.16658	6.27536
1416017_at	10.7391	10.7217	10.5562	10.58	10.509	10.5238	10.5746	10.6502	10.5768	10.6568	10.6284	10.5596	10.5059	10.4334	10.4803	10.5746	10.5773
1416018_at	8.57572	8.4705	8.79071	8.8417	8.38371	8.59296	8.78574	8.67188	8.55505	8.47956	8.25845	8.33594	8.59713	8.2825	8.68793	8.43065	8.65381
1416019_at	7.88586	7.84459	7.97779	7.68744	7.82816	7.87768	7.86981	7.7317	7.66137	7.78801	7.55637	7.49123	7.93604	7.59258	7.83485	7.74915	7.74712
1416020_a_at	11.2028	11.2047	11.2743	11.3215	11.3783	11.3436	11.4633	11.4569	11.4785	11.32	11.3015	11.3687	11.4474	11.3649	11.2315	11.3215	11.2766
1416021_a_at	12.397	12.5168	12.6112	12.5641	12.5212	12.6218	12.5386	12.6109	12.6099	12.4741	12.2134	12.3608	12.6292	12.2404	12.5069	12.4988	12.4921
1416022_at	11.1802	11.2033	11.372	11.3732	11.4682	11.4338	11.375	11.4154	11.3559	11.2578	11.0679	11.1343	11.2978	11.1827	11.4421	11.2526	11.3089
1416023_at	10.3057	10.3033	10.3171	10.3974	10.4612	10.4815	10.4168	10.3336	10.3586	10.416	10.134	10.3693	10.5017	10.3407	10.2947	10.2727	10.2624
1416024_x_at	11.5265	11.4681	11.561	11.5921	11.5992	11.546	11.5302	11.498	11.5942	11.546	11.428	11.5518	11.5142	11.555	11.6242	11.5205	11.5823
1416025_at	3.98064	4.41522	4.32443	4.33567	4.24315	4.09245	4.13972	4.37176	4.27021	4.33022	4.35231	4.21638	4.01732	4.18214	3.96935	4.33713	4.21119
1416026_a_at	11.8341	11.7679	11.9709	12.0077	12.1161	12.1065	12.0047	12.1357	12.087	11.929	11.7856	11.999	12.0721	12.0349	11.9998	12.025	11.961
1416027_at	10.8767	10.9143	10.9429	11.0539	11.0747	11.0481	10.98	10.8159	10.8695	10.97	10.8097	11.0106	10.8934	10.818	10.9831	10.97	10.9811
1416028_a_at	9.00928	9.08501	9.17294	9.18134	9.20331	9.17915	9.32409	9.24974	9.2861	9.16496	9.07326	9.01367	9.37429	9.11454	9.3235	9.11794	9.14929
1416029_at	7.76171	8.05605	7.87273	8.04266	7.75768	8.21338	8.10074	7.93396	7.87698	7.79717	7.80727	7.52096	7.97582	7.73159	8.06874	7.80717	8.04838
1416030_a_at	7.68569	7.5417	7.7303	7.75496	7.67129	7.63315	7.76658	7.63237	7.84382	7.52432	7.48752	7.59945	7.77645	7.69805	7.66305	7.60639	7.65725
1416031_s_at	7.12091	7.23375	7.33317	7.36339	7.27996	7.28554	7.52936	7.35909	7.34679	7.30543	7.29433	7.18049	7.27683	7.42154	7.18068	7.27167	7.26855
1416032_at	7.65001	8.30833	7.84019	8.05429	7.8108	8.04053	7.82291	7.46911	7.25588	7.93431	7.74054	7.98068	7.99479	7.64382	8.41126	7.98241	8.00993
1416033_at	5.12414	5.28974	5.48981	5.2274	5.28073	5.25147	5.33453	5.40997	5.54388	5.47828	5.75164	5.37052	5.17641	5.16966	5.28405	5.42378	5.40293
1416034_at	8.0726	8.2254	8.16411	7.93018	8.3433	8.01099	8.12956	7.88167	8.29568	8.03772	7.88923	8.14769	7.97784	8.16953	8.15953	8.06459	7.94552
1416035_at	8.90902	8.90358	9.11782	9.18994	8.98637	8.99099	9.07387	9.24671	9.1135	8.79588	8.78168	8.89284	9.01396	8.86525	8.97245	8.84867	9.10292
1416036_at	12.6458	12.6574	12.7566	12.5736	12.7573	12.7487	12.8731	12.5899	12.7736	12.6481	12.6835	12.6001	12.6843	12.5569	12.6794	12.6617	12.6735
1416037_a_at	11.264	11.3174	11.2589	11.3294	11.3239	11.4158	11.2988	11.3064	11.339	11.347	11.0966	11.264	11.2132	11.1557	11.2587	11.2639	11.1546
1416038_at	8.47541	8.56274	8.50596	8.24974	8.48273	8.41335	8.56962	8.15402	8.4491	8.51853	8.55547	8.42707	8.55184	8.47995	8.36926	8.27193	8.36336
1416039_x_at	5.3829	5.48755	5.59888	5.58942	5.41406	5.58942	5.63324	5.46899	5.64572	5.47157	5.58942	5.58942	5.74425	5.71616	5.58752	5.61881	5.66903
1416040_at	3.87681	3.9118	3.7808	3.88416	3.88416	3.82715	3.93287	3.9314	3.86157	3.93774	3.95688	3.95107	3.99076	3.88416	3.88416	3.88416	3.72591
1416041_at	10.0526	9.89697	10.8404	9.8785	10.2929	9.89986	10.3921	10.1093	10.1089	11.1707	10.7212	10.0652	10.865	10.1866	10.6206	11.2814	10.5682
1416042_s_at	7.77941	7.80253	7.84448	7.83523	7.79237	7.84647	7.78527	7.7836	7.83665	7.83523	7.83523	7.88886	7.98219	7.99225	7.70732	7.70244	7.83523
1416043_at	4.01519	3.96669	4.09137	4.07946	4.04293	3.72737	4.04293	4.00616	4.06334	4.26169	4.04293	4.06794	3.87862	4.15849	3.96007	4.04293	4.02306
1416044_at	8.76071	8.82287	8.59223	8.74866	8.48507	8.69411	8.69351	8.56577	8.47596	8.83816	8.53842	8.8579	8.6841	8.50846	8.72587	8.76242	8.71319
1416045_a_at	9.95567	9.92163	9.71186	9.93588	9.67233	9.84173	9.82515	9.76944	9.71628	9.89688	9.76123	9.7636	9.69491	9.4357	9.62549	9.63795	9.69204
1416046_a_at	8.25357	8.13675	8.30483	8.41718	8.12213	8.23233	8.19711	8.43629	8.34059	8.26779	7.93021	8.1893	8.13502	8.15221	8.19743	8.06913	8.26872
1416047_at	4.55681	4.30424	4.55894	4.38361	4.41477	4.4668	4.3807	4.57037	4.36197	4.25381	4.41477	4.26431	4.66204	4.44995	4.4845	4.41107	4.2987
1416048_at	9.61917	9.77412	9.59681	9.61917	9.58593	9.65892	9.52742	9.45835	9.52215	9.84824	9.71932	9.6851	9.66056	9.35056	9.63077	9.67935	9.55654
1416049_at	8.73126	8.71522	8.68366	8.67969	8.41644	8.63215	8.78569	8.82079	8.73344	8.65974	8.91102	8.65909	8.70201	8.6879	8.58566	8.6879	8.78599
1416050_a_at	8.64467	8.56858	8.6071	8.527	8.4594	8.46022	8.62178	8.42245	8.42838	8.53307	8.50995	8.36751	8.50436	8.48332	8.53189	8.36751	8.50436
1416051_at	5.24884	5.29292	5.35791	5.40543	5.44853	5.81767	5.10507	5.41663	5.80251	5.30633	5.45699	5.42515	5.35357	5.61463	5.37411	5.67814	5.22837
1416052_at	10.7914	10.8078	10.9057	10.8923	10.8599	10.9376	10.8318	10.7744	10.7811	10.7971	10.5946	10.8568	10.9149	10.692	10.8648	10.8635	10.9356
1416053_at	9.55329	9.45336	9.65511	9.67982	9.39757	9.49982	9.86963	9.60621	9.53504	9.55949	9.45032	9.36736	9.42566	9.13531	9.64762	9.5729	9.68908
1416054_at	12.6582	12.7085	12.7323	12.8234	12.8731	12.8224	12.7983	12.7464	12.8092	12.7273	12.6063	12.8449	12.829	12.8416	12.8109	12.8099	12.813
1416055_at	3.31131	3.28322	3.49366	3.42533	3.3285	3.55763	3.49549	3.39869	3.37957	3.32293	3.39869	3.37035	3.2325	3.56993	3.42533	3.77706	3.35735
1416056_a_at	11.9798	11.9419	11.9769	12.1027	12.0434	12.0466	12.0579	12.0942	12.0781	11.9434	11.8986	12.0144	12.0589	12.039	12.0371	12.0488	12.1226
1416057_at	12.1916	12.2091	12.2619	12.3133	12.4516	12.3356	12.2555	12.2789	12.354	12.261	12.1665	12.3498	12.3368	12.4212	12.2566	12.3386	12.2689
1416058_s_at	12.7222	12.6026	12.6684	12.7396	12.8224	12.7712	12.7475	12.7381	12.7602	12.6652	12.5469	12.7625	12.7508	12.6134	12.706	12.7529	12.6817
1416059_at	10.0642	10.0669	9.85062	9.98184	9.85227	9.96944	9.96723	9.91558	9.93094	9.98566	9.9116	9.99875	9.92921	9.89497	9.80959	9.89861	9.96322
1416060_at	9.26882	9.10457	9.27046	9.32441	9.06446	9.14041	9.30891	9.22453	9.22396	9.09309	9.00229	8.82486	9.26961	9.1263	9.26983	9.0571	9.26705
1416061_at	9.22619	9.2377	9.28982	9.35061	9.37943	9.4552	9.30833	9.32631	9.32631	9.32631	9.2779	9.36469	9.37452	9.32631	9.37527	9.35583	9.34485
1416062_at	7.63749	7.71062	7.83563	7.66851	7.871	7.70343	7.81841	7.88642	7.96231	7.84501	7.93725	8.02714	7.92875	7.56067	7.48986	7.64401	7.92577
1416063_x_at	3.33859	3.45002	3.39096	3.34929	3.73135	3.39005	3.40345	3.41919	3.37995	3.45456	3.52716	3.56338	3.54941	3.42192	3.46938	3.45002	3.45002
1416064_a_at	11.0235	10.7224	10.651	10.8726	10.6084	10.6784	10.7673	10.8276	10.8657	11.1397	11.0364	11.4402	11.2632	11.2729	11.2749	11.2864	11.3708
1416065_a_at	8.43599	8.4153	8.2272	8.43405	8.09043	7.99361	8.09915	8.36764	8.13153	8.44691	8.22112	7.79065	8.2905	8.08384	8.40546	8.08493	8.15702
1416066_at	9.92419	9.92924	9.90284	9.85291	9.99737	10.0226	9.94413	9.90534	10.1253	9.97055	9.91977	9.97751	9.76836	10.0588	9.91407	9.67992	9.8244
1416067_at	9.44687	9.33521	9.49555	9.53383	9.33842	9.50713	9.51481	9.41491	9.33274	9.50773	9.14261	9.18375	9.41298	9.37239	9.54409	9.36392	9.38186
1416068_at	9.48765	9.53702	9.51605	9.5305	9.45487	9.49188	9.59763	9.4703	9.6173	9.51949	9.37678	9.57129	9.58536	9.50934	9.39714	9.52414	9.4118
1416069_at	11.0552	10.9592	10.7462	11.0151	10.8807	10.8613	10.8613	10.8055	10.8172	10.9964	10.861	10.8487	10.8317	10.8793	10.8162	10.7582	10.91
1416070_a_at	7.32497	7.42667	7.38197	7.45444	7.29903	7.43364	7.53822	7.44292	7.38398	7.42667	7.44989	7.44979	7.49232	7.42985	7.31234	7.26546	7.5513
1416071_at	8.52851	8.54093	8.44997	8.52708	8.553	8.60327	8.49889	8.35077	8.53733	8.54094	8.50061	8.54858	8.67149	8.70216	8.48037	8.56748	8.63555
1416072_at	8.65447	8.83487	8.78795	8.91228	8.74707	8.98269	8.69063	8.82361	8.7021	8.66129	8.37617	8.56138	8.69927	8.53228	8.59853	8.57637	8.7021
1416073_a_at	8.30289	8.5277	8.39339	8.4279	8.3189	8.40164	8.4012	8.38399	8.22877	8.45713	8.40452	8.55099	8.50483	8.4606	8.39319	8.4012	8.3723
1416074_a_at	13.0175	13.0169	12.9544	12.9944	13.1038	13.069	12.9972	12.808	12.8964	13.0043	12.8678	12.9387	13.0368	12.9319	13.0961	13.0544	13.0075
1416075_at	7.68555	7.66948	7.74769	7.68744	7.72081	7.72983	7.7091	7.66411	7.71476	7.70959	7.83354	7.70328	7.6008	7.77476	7.7091	7.73621	7.7091
1416076_at	3.74973	4.14138	4.12858	4.05169	4.19236	4.08791	4.10467	4.00647	4.07855	3.9168	3.94846	3.85679	4.20884	3.90605	4.02851	3.86748	4.10722
1416077_at	4.86463	5.15394	4.43906	4.87911	4.79973	4.75718	4.67288	4.81728	4.65903	5.12785	4.87591	4.87591	5.06613	4.87591	5.19506	5.07605	4.89456
1416078_s_at	9.50106	9.38025	9.34783	9.41052	9.26494	9.32157	9.35573	9.46908	9.3921	9.36069	9.47381	9.27559	9.42219	9.24906	9.20627	9.30042	9.37811
1416079_a_at	11.1109	11.2511	11.2024	11.2292	11.0856	11.2068	11.26	10.9093	11.1465	11.2358	11.001	11.1759	11.1085	10.9444	11.1848	11.1368	11.1159
1416080_at	7.07873	7.24096	6.90831	6.85791	7.12372	7.01552	7.06927	6.9651	6.95811	6.95002	7.11913	7.00377	7.15285	7.00103	7.04265	6.95055	6.81322
1416081_at	7.5016	7.38912	7.44973	7.38072	7.34633	7.3255	7.37833	7.33037	7.41378	7.48873	7.38232	7.28976	7.16293	7.07311	7.34575	7.34505	7.34575
1416082_at	12.5621	12.4723	12.5386	12.5031	12.5225	12.5975	12.5798	12.4928	12.5475	12.4966	12.3372	12.5021	12.5474	12.396	12.5482	12.4844	12.5479
1416083_at	12.0254	11.9938	11.9572	11.9556	11.8749	11.9331	11.9723	12.0095	11.9085	11.8542	11.7385	11.7575	11.841	11.5033	11.7896	11.8799	11.8577
1416084_at	9.0966	9.1808	9.20927	9.09707	9.16017	9.1437	9.30492	9.13303	9.15544	9.01522	9.06335	8.84528	8.95567	8.79232	9.12215	9.09707	9.02876
1416085_s_at	11.7019	11.7255	11.747	11.6841	11.6366	11.6626	11.7517	11.6026	11.6135	11.5594	11.4472	11.5863	11.5088	11.2062	11.7113	11.5174	11.5794
1416086_at	8.71695	8.74788	8.73457	8.75383	8.64362	8.77027	8.72035	8.59252	8.63337	8.63337	8.43475	8.47461	8.65333	8.38297	8.69976	8.55126	8.44724
1416087_at	11.3028	11.202	11.4123	11.3284	11.4254	11.4861	11.4469	11.4162	11.4684	11.2859	11.2854	11.305	11.6027	11.2978	11.3899	11.3709	11.3792
1416088_a_at	12.5314	12.553	12.6947	12.6548	12.8688	12.7515	12.7108	12.7795	12.8941	12.6946	12.5847	12.7324	12.8597	12.7967	12.7288	12.7906	12.6503
1416089_at	12.7496	12.8268	12.875	12.8714	13.0551	12.9392	12.9143	12.9606	13.0035	12.8183	12.7972	12.9003	12.9511	12.9825	12.9083	12.8844	12.8916
1416090_at	11.7791	11.7779	11.7009	11.8066	11.7847	11.7779	11.7535	11.7244	11.7959	11.7998	11.6838	11.8265	11.7971	11.7379	11.7105	11.7511	11.7914
1416091_at	10.7667	10.8854	10.7254	10.7215	10.6837	10.7144	10.7974	10.4631	10.4503	10.8194	10.5459	10.4675	10.6524	10.4043	10.6945	10.6884	10.7015
1416092_a_at	10.1829	10.3023	10.2355	10.2128	10.1536	10.2996	10.3591	9.98666	9.97639	10.2657	10.0783	10.0809	10.1676	9.98076	10.2505	10.1854	10.2385
1416093_a_at	10.2005	10.2512	10.3177	10.3333	10.4901	10.3454	10.3717	10.3922	10.341	10.2976	10.1733	10.3267	10.4084	10.3214	10.5201	10.3118	10.3311
1416094_at	9.91625	9.61355	9.58639	9.78499	9.48469	9.60617	9.59872	9.59203	9.57546	9.70473	9.46931	9.50759	9.6592	9.39798	9.73205	9.62083	9.63706
1416095_x_at	9.53873	9.60259	9.73465	9.79454	9.71449	9.72363	9.61796	9.76073	9.7593	9.6996	9.47724	9.65672	9.72389	9.67766	9.71028	9.70168	9.73891
1416096_at	9.5348	9.44942	9.50692	9.50508	9.51515	9.43312	9.50717	9.50189	9.50356	9.46998	9.35471	9.39155	9.46196	9.40831	9.29845	9.465	9.41582
1416097_at	9.68726	9.51722	9.39781	9.49005	9.3859	9.28863	9.57511	9.28079	9.29477	9.30459	9.34675	9.34937	9.3649	8.99405	9.45762	9.19631	9.42697
1416098_at	10.6286	10.5676	10.4391	10.5176	10.4116	10.5642	10.4618	10.4263	10.3805	10.5645	10.4064	10.5653	10.5194	10.3109	10.4897	10.4991	10.5062
1416099_at	11.8249	11.8239	11.9343	11.9087	12.0898	11.9684	11.9196	12.0302	12.0533	11.8513	11.8545	11.9343	11.9615	12.0184	11.8823	11.9019	11.9719
1416100_at	10.8091	10.7068	10.7192	10.8545	10.7092	10.7469	10.7161	10.6929	10.7525	10.7334	10.6876	10.6807	10.6859	10.6279	10.6025	10.6033	10.6192
1416101_a_at	10.3064	9.99188	10.2593	10.0746	10.0412	10.1888	10.0678	10.319	10.5127	10.047	10.2513	10.278	10.0718	10.5441	9.82229	10.2074	10.0745
1416102_at	11.4367	11.701	11.5941	11.3056	11.5373	11.6105	11.6623	11.3711	11.6108	11.557	11.5026	11.4186	11.5083	11.3636	11.5972	11.4526	11.5344
1416103_at	9.88383	9.83244	9.61793	9.54759	9.24166	9.54948	9.66111	9.43082	9.7837	9.54419	9.24615	9.52967	9.49317	9.51074	9.71097	9.41916	9.74081
1416104_at	8.5086	8.45235	8.6109	8.57527	8.57527	8.63474	8.58334	8.73597	8.7134	8.6124	8.39083	8.66496	8.63025	8.4568	8.46074	8.5153	8.48647
1416105_at	8.32663	8.31941	8.15043	8.35119	8.15685	8.17823	8.14861	8.01457	8.0657	8.23232	8.24529	8.23278	8.23144	8.23232	8.36252	8.15282	8.43137
1416106_at	8.46524	8.47747	8.47052	8.37922	8.29971	8.50245	8.61306	8.24413	8.29006	8.32549	8.34828	8.40184	8.56096	8.24436	8.39554	8.25481	8.41542
1416107_at	12.7926	12.8833	12.8247	12.802	12.7894	12.809	12.8819	12.7449	12.837	12.7887	12.7415	12.8092	12.8908	12.6822	12.833	12.7919	12.6948
1416108_a_at	8.89398	8.92495	8.86678	9.0493	8.90544	9.04806	8.90559	8.72318	8.854	9.03233	8.55319	8.98951	8.95782	8.93113	8.98222	8.93113	8.93375
1416109_at	9.57836	9.57078	9.68817	9.7427	9.73225	9.75395	9.68701	9.72456	9.83512	9.66879	9.52959	9.62735	9.73004	9.64295	9.67788	9.87872	9.58361
1416110_at	8.83986	8.86109	8.84653	8.89896	8.81404	8.88286	8.84667	8.78013	8.79406	8.79677	8.82585	8.79031	8.9417	8.78669	8.67776	8.79996	8.9021
1416111_at	8.42241	8.38954	8.493	8.61888	8.39995	8.45701	8.47572	8.47142	8.50467	8.30126	8.30548	8.34596	8.33233	8.25293	8.20424	8.45801	8.37214
1416112_at	12.1001	12.2643	12.2447	12.1635	12.4	12.2786	12.3361	12.3043	12.4892	12.2637	12.4344	12.3581	12.3375	12.4978	12.1404	12.2462	12.2769
1416113_at	11.2197	11.334	11.3681	11.2599	11.2804	11.3843	11.3337	11.1808	11.3565	11.3116	11.2572	11.3365	11.4098	11.3053	11.4313	11.306	11.1757
1416114_at	13.2516	13.2614	13.2638	13.3087	13.2501	13.3372	13.3521	13.2614	13.2542	13.2651	13.0907	13.2501	13.2408	13.1203	13.3422	13.2739	13.3294
1416115_at	8.92048	8.87522	8.9222	8.95693	9.02823	8.92085	8.92511	8.92058	8.91095	8.90835	8.78507	8.74402	8.94498	8.89994	8.7826	8.76764	8.76369
1416116_at	7.85384	7.87975	7.9993	8.08255	7.91274	7.97661	7.99898	8.11949	7.92792	7.87493	7.64891	7.90593	7.90334	7.90106	7.92001	7.84029	7.81481
1416117_at	7.09324	7.03949	7.06264	7.14045	7.00608	7.08124	7.11892	6.86662	7.15208	7.13831	6.89216	7.14554	7.17179	7.12666	7.09141	7.09709	7.10006
1416118_at	7.98276	7.61777	7.46828	7.89106	7.38979	7.90504	7.70459	7.74543	7.49998	7.35874	7.3383	7.34427	7.05978	7.19147	7.29759	7.105	7.58848
1416119_at	11.0571	11.1503	11.1987	11.2565	11.3149	11.3496	11.246	11.2278	11.191	11.2008	11.1067	11.2771	11.2292	11.2008	11.2008	11.1663	11.2725
1416120_at	4.95888	5.14086	4.94925	4.70042	4.8657	4.94955	4.9314	4.84863	4.94925	5.12226	5.04535	5.0731	5.1799	5.03939	5.01378	4.74216	4.84343
1416121_at	4.88417	5.13543	4.98949	4.87461	5.36501	5.566	5.05707	5.26025	5.20456	4.78784	5.15221	5.31567	4.80095	5.14923	5.08386	5.2047	4.99462
1416122_at	10.1048	10.1858	10.1245	10.1978	10.1872	10.1156	10.1928	10.1974	10.3333	10.2586	10.3432	10.4145	10.0787	10.2587	10.2974	10.1813	10.2593
1416123_at	5.37381	5.67297	5.39863	5.50971	5.62513	5.33097	5.10943	5.14605	5.40446	5.39056	5.43051	5.02709	5.60544	5.47008	5.98708	5.47972	5.46443
1416124_at	4.92062	4.92209	5.34225	4.91854	4.97588	5.3544	5.18046	4.9771	5.20288	5.44484	4.98841	4.85629	5.27808	4.65039	5.17706	5.06215	5.19637
1416125_at	9.70796	9.77112	10.0741	9.85538	9.89048	9.71833	9.73444	9.6014	9.85538	10.2128	9.85621	9.86133	10.1116	9.77023	9.93012	10.0417	9.84089
1416126_at	7.29171	7.37647	7.47343	7.52945	7.03804	7.3446	7.18569	7.37774	7.29828	7.39153	7.46063	7.56403	7.03618	7.24821	7.1648	7.4175	7.49998
1416127_a_at	9.28857	9.15724	9.15007	9.29733	9.28465	9.31948	9.38425	9.14244	9.22565	9.21501	9.16279	9.24559	9.33238	9.32541	9.20188	9.18654	9.20435
1416128_at	5.36532	5.34832	5.30697	5.55633	5.58871	5.61055	5.40446	5.34125	5.65903	5.18759	5.61598	5.91537	5.46762	5.97148	5.66687	5.53818	5.42843
1416129_at	9.54961	9.52406	9.58648	9.61817	9.55354	9.52028	9.56946	9.62258	9.61095	9.99221	9.86526	9.65417	9.82189	9.61994	9.65313	9.93309	9.68933
1416130_at	12.5795	12.5663	12.6441	12.5916	12.6018	12.6293	12.6359	12.5864	12.654	12.6282	12.5385	12.5876	12.6329	12.4519	12.5046	12.5916	12.5227
1416131_s_at	10.4107	10.3985	10.6049	10.6301	10.2275	10.6059	10.5597	10.4757	10.3511	10.4428	10.1323	10.3338	10.5856	10.1666	10.6374	10.4426	10.6406
1416132_at	9.50421	9.58511	9.48782	9.49542	9.5299	9.74212	9.52829	9.36108	9.44675	9.67595	9.33619	9.72829	9.73108	9.60421	9.72919	9.54431	9.70926
1416133_at	11.491	11.6278	11.4632	11.6449	11.5791	11.65	11.4741	11.2392	11.2035	11.6644	11.3843	11.5877	11.5998	11.481	11.5425	11.5298	11.6941
1416134_at	12.5048	12.7268	12.5461	12.4809	12.5127	12.5481	12.4789	12.3108	12.3649	12.5789	12.4188	12.5412	12.4572	12.3889	12.5404	12.53	12.4299
1416135_at	9.91571	9.8734	9.89585	10.0028	9.97826	9.94722	9.97542	9.94055	9.97667	9.87232	9.78659	9.98215	9.93735	9.85812	9.78967	9.91454	9.82383
1416136_at	5.68205	5.65584	5.66076	5.69035	5.59108	5.99445	5.85848	5.6914	6.05964	5.47538	5.77861	5.96347	5.63492	5.77036	5.52829	6.03032	5.81989
1416137_at	8.86801	8.80505	8.82324	8.82309	8.72393	8.90005	8.80505	8.87826	8.80444	8.8294	8.61182	8.92515	8.84163	8.62983	8.81562	8.84031	8.72595
1416138_at	10.1733	10.1338	10.0784	10.1406	10.0886	10.1605	10.2741	10.0324	10.2447	10.0886	10.0056	10.1446	10.0551	9.9229	10.0069	10.0512	10.0884
1416139_at	6.4692	6.53993	6.67661	6.38862	6.64583	6.61425	6.53928	6.64313	6.6115	6.66291	6.70564	6.66046	6.67019	6.57949	6.57407	6.82098	6.51321
1416140_a_at	10.5814	10.6304	10.4523	10.5482	10.4119	10.4976	10.4773	10.4061	10.4298	10.5646	10.4984	10.397	10.4073	10.3472	10.2154	10.434	10.3711
1416141_a_at	13.7068	13.7039	13.6628	13.6881	13.7708	13.7047	13.655	13.7047	13.7237	13.6883	13.6969	13.7058	13.7047	13.7532	13.6517	13.6936	13.7427
1416142_at	8.54264	8.47091	8.61965	8.65444	8.37732	8.53649	8.51719	8.58199	8.54649	8.4927	8.34565	8.38541	8.39148	8.65637	8.58323	8.46512	8.61417
1416143_at	12.2854	12.1924	12.2974	12.328	12.3794	12.3203	12.351	12.3029	12.3463	12.2453	12.1939	12.2972	12.413	12.3216	12.3621	12.2827	12.3058
1416144_a_at	10.2561	10.1949	10.4229	10.5322	10.1683	10.3611	10.3641	10.4859	10.4168	10.3949	10.1457	10.116	10.2829	10.0791	10.4114	10.2273	10.525
1416145_at	11.0201	10.9232	10.9184	11.0024	10.8985	10.9184	10.9714	10.8523	10.8935	10.9676	10.8005	10.8832	10.9216	10.8022	11.0363	10.9184	11.0012
1416146_at	9.56813	9.64185	9.52684	9.65758	9.25507	9.51144	9.48492	9.43808	9.40951	9.29612	9.00327	9.07146	9.22744	9.16712	9.42195	9.01272	9.44292
1416147_at	9.45161	10.4495	9.60796	9.88586	8.77345	9.12916	9.48461	9.03906	9.27157	9.63302	8.5968	9.17366	9.27071	10.0426	10.0013	8.4142	9.88584
1416148_at	10.5471	10.4259	10.5901	10.5295	10.5174	10.5648	10.5364	10.5136	10.5596	10.5118	10.5937	10.5051	10.4818	10.5295	10.4479	10.5009	10.5939
1416149_at	11.7073	11.5969	11.5499	11.569	11.3404	11.5353	11.5644	11.6164	11.4607	11.8267	11.6293	11.6995	11.5337	11.3644	11.3463	11.5193	11.5951
1416150_a_at	10.5243	10.3674	10.7358	10.599	10.6466	10.7245	10.7162	10.6912	10.7967	10.7162	10.5828	10.6631	10.8734	10.7516	10.7621	10.8039	10.7162
1416151_at	9.22537	9.0801	9.29614	9.34394	9.11066	9.21364	9.09642	9.16972	9.18669	9.25483	9.00345	9.27768	9.4225	9.21657	9.32509	9.21489	9.3291
1416152_a_at	10.0468	9.87407	10.1984	10.1528	9.89643	10.1014	10.0664	10.013	10.1629	10.1459	9.95178	9.96452	10.1961	10.0634	10.2003	10.0918	10.1465
1416153_at	11.2091	11.174	11.1952	11.2245	11.2696	11.2425	11.1247	11.1016	11.2329	11.101	10.9852	11.1729	11.1871	11.1376	11.1528	11.0962	11.1621
1416154_at	5.34141	5.09733	5.3923	5.0446	5.21066	5.14216	5.38148	5.45787	5.37811	5.36369	5.65942	5.4359	5.51193	5.41983	5.279	5.58451	5.15653
1416155_at	8.48848	8.48338	8.45685	8.59587	8.49693	8.69686	8.5741	8.47967	8.4363	8.29829	8.27282	8.26675	8.55494	8.31976	8.16348	8.28748	8.26509
1416156_at	9.27126	9.1631	9.04959	9.1801	8.99848	9.02143	9.06475	9.27851	9.28289	9.30071	9.19631	9.25841	9.1631	9.06129	9.16731	9.11564	9.22129
1416157_at	6.03689	6.062	5.93616	5.97749	6.04577	6.08712	5.95846	5.98589	5.96848	6.29771	6.03689	6.20979	6.27121	5.90114	6.13511	5.89439	6.03689
1416158_at	7.65491	7.65886	7.46198	7.84251	7.33065	7.63378	7.6239	7.66814	7.2886	7.49684	6.77097	7.37774	7.66712	7.28062	7.39151	7.35563	7.44795
1416159_at	8.82267	9.03128	8.57304	9.06076	8.52946	8.54384	8.46226	8.62555	8.66771	8.42766	8.43911	8.62688	8.67061	8.64957	8.58392	8.64076	8.71287
1416160_at	6.25565	6.73334	6.22587	6.74087	6.02539	6.59843	6.08598	6.45455	6.24659	6.05198	5.89989	6.2807	6.36463	6.32391	5.84537	6.23673	6.15459
1416161_at	10.4629	10.1607	10.3407	10.3743	10.2102	10.3423	10.3166	10.2466	10.2275	10.2081	9.89914	10.1488	10.1191	9.88098	10.3915	10.2336	10.3805
1416162_at	9.00454	9.18523	8.98622	8.98093	9.04996	9.11761	8.93371	8.90967	8.8098	9.01958	8.73758	9.04544	8.9775	8.79516	8.89372	8.78283	8.9574
1416163_at	9.85361	9.65761	9.79425	9.87201	9.81889	9.81857	9.82332	9.90927	9.82667	9.76798	9.60151	9.73885	9.756	9.69904	9.8557	9.78526	9.78985
1416164_at	6.49501	6.7271	6.19979	7.11972	6.64452	7.23969	6.67922	7.04306	7.37664	6.57992	7.03324	6.9037	6.68449	7.06902	6.67565	6.86261	7.01722
1416165_at	9.9549	9.89833	10.0412	10.0263	9.97561	9.91335	10.0215	10.0126	9.98006	10.1355	10.0512	10.1221	10.0334	10.0934	9.93981	9.87687	9.9995
1416166_a_at	5.29093	5.13679	5.35791	5.62705	5.27007	5.39653	5.70274	5.36679	5.19828	5.16785	4.93669	5.13027	5.20538	5.07421	5.47518	4.92609	5.47069
1416167_at	8.88557	8.79666	8.95811	9.10339	9.02769	9.18905	8.93669	8.7346	8.88557	8.72252	8.5853	8.84171	8.8076	8.96532	8.90129	8.77223	8.97836
1416168_at	8.36367	8.20164	7.85153	8.33619	8.04352	8.46518	8.28363	8.44151	8.43505	8.20909	8.35908	8.224	7.99348	8.13938	8.11935	8.28765	8.25189
1416169_at	4.02181	3.57914	3.86628	3.86958	3.81508	3.88903	3.85154	3.71909	3.86102	3.88992	3.86628	3.97006	3.89233	3.94794	3.75359	3.88854	3.77092
1416170_at	9.57088	9.38284	9.30262	9.44139	9.2885	9.38477	9.38615	9.43673	9.44615	9.36094	9.35956	9.39488	9.41798	9.34179	9.25519	9.28266	9.25712
1416171_at	9.6246	9.6138	9.59429	9.6844	9.65119	9.53888	9.65182	9.64975	9.54423	9.60355	9.55432	9.42073	9.58488	9.40937	9.48835	9.5253	9.48076
1416172_at	8.66041	8.57488	8.60669	8.738	8.58525	8.67385	8.54646	8.61174	8.58525	8.66539	8.36922	8.66995	8.6893	8.53867	8.53728	8.33312	8.51995
1416173_at	6.98388	6.78498	6.93	7.02185	6.75433	7.02357	6.915	6.74869	6.83848	6.87601	6.77557	7.13407	7.08344	6.87479	6.91196	6.97763	7.26659
1416174_at	8.5669	8.49845	8.68367	8.77679	8.42584	8.5669	8.68243	8.58754	8.56604	8.49177	8.33814	8.34568	8.52794	8.33494	8.77992	8.48336	8.76214
1416175_a_at	11.5427	11.5173	11.7133	11.6999	11.5699	11.6515	11.5917	11.7361	11.7387	11.5393	11.4057	11.5675	11.6002	11.448	11.6361	11.5068	11.6289
1416176_at	11.3666	11.4091	11.5624	11.4942	11.3936	11.5366	11.5412	11.4637	11.5227	11.4382	11.2112	11.4012	11.5651	11.4771	11.5512	11.469	11.5196
1416177_at	9.75614	9.75614	9.69665	9.90858	9.80063	9.77393	9.75614	9.85545	9.80123	9.78759	9.57907	9.71013	9.806	9.64497	9.76792	9.68975	9.7642
1416178_a_at	12.7313	12.8081	12.7419	12.7333	12.7406	12.7774	12.6672	12.5647	12.6476	12.7441	12.7086	12.859	12.7732	12.7081	12.6211	12.6295	12.7749
1416179_a_at	9.22676	8.70258	9.15437	9.31446	8.97367	9.11032	9.40288	9.15534	9.05866	8.69807	8.71731	8.97497	8.82981	8.67275	9.22889	8.90923	9.20901
1416180_a_at	7.82889	8.12858	8.00454	8.10346	7.72461	7.98306	7.8825	7.61947	7.75644	7.95208	7.69459	7.78723	7.98528	7.63819	8.10528	7.72953	7.89468
1416181_at	10.4369	10.4561	10.3912	10.5645	10.485	10.5499	10.4888	10.3411	10.4632	10.5364	10.4115	10.5164	10.5385	10.5354	10.4202	10.4464	10.5212
1416182_at	7.30033	7.13875	7.23124	7.14026	7.32869	7.14044	7.37339	7.1483	7.41451	7.03418	7.16363	7.36558	7.30033	7.24413	7.04287	7.20885	7.16761
1416183_a_at	12.3966	12.5945	12.4996	12.6153	12.6388	12.6907	12.4801	12.2747	12.3439	12.5871	12.4607	12.7349	12.6769	12.5293	12.5594	12.5921	12.6135
1416184_s_at	9.57741	9.67495	9.6495	9.64438	9.60524	9.71441	9.49687	9.41304	9.40563	9.56776	9.41683	9.57437	9.44447	9.39696	9.55191	9.46824	9.62834
1416185_a_at	10.7028	10.6028	10.6672	10.8325	10.7487	10.7617	10.7099	10.6941	10.6705	10.6941	10.5214	10.6953	10.7387	10.5345	10.691	10.7288	10.737
1416186_at	8.2759	8.41303	8.56163	8.70137	8.51964	8.59996	8.59209	8.51641	8.58818	8.60457	8.41718	8.56319	8.57051	8.54809	8.68572	8.6152	8.65918
1416187_s_at	8.60162	8.48258	9.04206	9.06042	8.74033	8.86257	9.15412	8.859	8.86735	8.85309	8.85309	8.71324	8.70217	8.80983	9.42938	8.78001	9.19057
1416188_at	7.96813	8.06377	8.25027	8.13739	8.12485	8.17306	8.15131	7.84438	8.27264	8.03694	7.80325	8.13464	7.95874	7.77857	8.07738	8.24714	8.24773
1416189_a_at	9.8346	9.7943	9.76578	9.88932	9.77409	9.8358	9.94521	10.0822	9.85965	9.98122	9.88196	9.83461	9.82874	9.73617	9.74123	9.78029	9.88632
1416190_a_at	7.12225	7.16618	7.30477	7.13208	6.97314	7.26942	7.23557	7.24074	7.31626	7.67711	7.23671	7.57033	7.35817	7.20864	7.17136	7.12459	7.24074
1416191_at	8.24598	8.27645	8.3835	8.05034	8.37062	8.39573	8.40524	8.23933	8.4134	8.44118	8.56052	8.5955	8.34332	8.23386	8.21707	8.37591	8.33033
1416192_at	9.32197	9.27764	9.3537	9.24358	9.1412	9.19639	9.22941	9.0137	9.11082	9.35404	9.23233	9.23161	9.27944	9.03906	9.30524	9.20818	9.23161
1416193_at	5.06959	4.73523	4.96778	4.74338	5.07134	4.94355	4.91444	5.04624	4.96705	4.92597	5.13757	5.13558	4.75175	4.98803	4.85788	5.28336	4.82861
1416194_at	4.49337	4.77708	4.69068	4.66001	4.89623	4.69318	4.73163	4.65471	4.77437	4.5635	5.07713	4.93671	4.56647	4.82188	4.80254	4.87193	4.76914
1416195_at	9.29477	9.06373	9.13706	9.07596	9.06185	9.04924	9.23104	9.13319	9.02823	9.25206	9.1398	9.08251	9.19895	9.14034	9.00632	9.15323	9.00969
1416196_at	4.1152	4.16	4.14883	4.1152	4.18338	4.02897	4.10962	4.20305	4.0238	4.05698	4.04242	4.01374	4.29085	4.1152	4.22846	4.01722	4.34221
1416197_at	10.1845	9.9917	10.0722	10.0904	10.074	10.0351	10.1504	10.2242	10.1915	10.1399	10.0684	10.1249	10.0806	10.0858	10.0293	10.0905	10.0695
1416198_at	8.69953	8.57193	8.46215	8.76336	8.37947	8.54205	8.58612	8.59292	8.5173	8.63167	8.40369	8.54809	8.45885	8.32793	8.41952	8.41426	8.41096
1416199_at	8.59362	8.70653	8.69319	8.7762	8.74469	8.72889	8.75438	8.59237	8.53318	8.70537	8.66632	8.66632	8.69403	8.66544	8.589	8.63621	8.62004
1416200_at	9.86855	9.70898	9.81804	9.87605	9.69327	9.83176	9.76746	9.90934	9.69389	9.69389	9.44587	9.49625	9.60759	9.44298	9.51955	9.46778	9.85047
1416201_at	10.1395	10.1589	10.1551	10.2031	10.1508	10.0528	10.1344	9.92981	10.1001	10.1178	9.96874	10.1344	10.1623	10.1119	10.2395	10.0986	10.2521
1416202_at	10.119	10.1555	10.131	10.202	10.2312	10.2245	10.1605	9.9805	10.0623	10.1754	9.95979	10.1181	10.1408	10.0475	10.3307	10.1902	10.1244
1416203_at	4.54548	4.28487	4.409	4.93065	4.54024	4.33013	4.51793	4.42317	4.91212	4.22426	4.49353	5.29721	4.19955	5.18689	4.65033	5.49609	4.51502
1416204_at	8.68495	8.45965	8.92162	8.56746	8.94665	8.85359	8.82964	8.82066	8.83722	9.0416	8.83722	8.95203	8.89206	8.6116	8.94241	9.07661	8.74536
1416205_at	8.06428	7.92674	7.90546	8.06082	7.82494	7.97901	7.9616	8.0214	8.03398	7.86865	7.72161	7.8849	7.80797	7.7996	7.58023	7.73959	7.83799
1416206_at	7.31833	7.17362	7.16063	7.42816	7.24895	7.47028	7.1349	7.50276	7.41986	7.45715	7.09859	7.22296	7.33377	7.25114	7.32217	7.29958	7.06864
1416207_at	9.16813	9.01156	8.91892	9.08516	8.92722	9.01156	9.00584	9.05179	9.03778	9.14478	9.03582	9.02431	9.01675	8.98273	8.96097	9.00017	8.87926
1416208_at	10.5437	10.7041	10.839	10.733	10.6498	10.8278	10.8308	10.6099	10.687	10.5717	10.3559	10.4928	10.7655	10.3252	10.7776	10.6247	10.7961
1416209_at	11.3825	11.4706	11.3265	11.363	11.4263	11.4231	11.3298	11.184	11.1729	11.3923	11.1998	11.3353	11.3185	11.163	11.4522	11.3969	11.3655
1416210_at	9.79699	9.69741	9.77831	9.85697	9.93613	9.82486	9.90664	9.96626	9.92932	9.76168	9.82283	9.8046	9.92727	9.88899	9.72665	9.80859	9.82283
1416211_a_at	10.0265	10.1791	10.0183	9.9301	10.1011	10.2303	10.3567	9.97976	10.3663	9.98812	9.90059	10.125	10.0081	10.2311	10.0752	9.7111	10.1282
1416212_at	9.76299	9.77309	9.87763	9.95379	9.87763	9.97864	9.83976	9.90861	9.93536	9.90253	9.63861	9.84539	10.0299	9.865	9.75055	9.83301	9.87763
1416213_x_at	8.49515	8.57511	8.62641	8.6152	8.51829	8.73038	8.61195	8.60944	8.54973	8.6152	8.54492	8.87469	8.73441	8.55691	8.59152	8.6152	8.54303
1416214_at	7.12327	7.10577	7.10238	7.04427	6.97521	7.16452	7.12658	7.10577	7.12316	7.17205	7.21105	7.04188	7.10577	7.08889	6.94525	7.01557	7.1205
1416215_at	8.50308	8.61902	8.59667	8.48441	8.40503	8.49264	8.47424	8.25155	8.45478	8.74212	8.3854	8.65216	8.69215	8.58392	8.62025	8.51934	8.57315
1416216_at	9.42227	9.26773	9.00731	9.16702	9.0274	8.9959	9.04042	9.04121	8.93164	9.23557	9.12117	9.05944	9.03341	8.80557	8.96235	9.02009	8.92907
1416217_a_at	13.3926	13.473	13.4698	13.5106	13.5752	13.5106	13.5222	13.5664	13.6017	13.4824	13.3671	13.5545	13.5373	13.6086	13.4256	13.5106	13.5029
1416218_x_at	8.0179	8.11896	8.13214	8.14293	8.20008	8.13421	8.13421	8.17765	8.22031	8.05142	8.01635	8.04141	8.33248	8.23254	8.02367	8.03302	8.05488
1416219_at	12.8383	12.8791	12.883	12.9333	13.0702	13.0266	12.8898	12.7987	12.8894	12.8916	12.6982	13.0048	12.9581	12.8735	13.0579	12.9998	12.9403
1416220_at	11.2618	11.1386	11.3435	11.3663	11.3373	11.4134	11.3221	11.4155	11.4203	11.2702	11.1657	11.3435	11.4199	11.2173	11.3435	11.3839	11.3888
1416221_at	9.10468	9.0368	8.90523	9.26146	9.0361	9.2137	8.95541	9.25729	9.1381	9.05676	8.88677	8.73366	9.0027	8.92451	8.93145	9.10275	8.82959
1416222_at	9.52471	9.45867	9.34817	9.38458	9.5312	9.44627	9.32198	9.52755	9.41238	9.34139	9.22228	9.40841	9.2194	9.29269	9.23051	9.23628	9.30755
1416223_at	8.59943	8.62036	8.70194	8.69498	8.6938	8.65584	8.6336	8.58196	8.60776	8.86714	8.74192	8.87728	8.89308	8.72168	8.76622	8.76336	8.72866
1416224_at	8.08724	8.29024	8.09874	8.36295	8.26328	8.1453	8.20553	8.28324	8.20803	8.3189	8.21071	8.34987	8.37749	8.25652	8.08596	8.26849	8.26328
1416225_at	4.98954	5.28727	5.23676	5.50581	5.30418	5.36831	5.35752	5.29121	5.57553	5.32554	5.26592	5.13725	4.95762	5.42919	5.34267	5.41594	5.30418
1416226_at	8.21012	8.26142	8.34463	8.52708	8.46991	8.57117	8.34828	8.44783	8.51861	8.41818	8.47229	8.57324	8.51012	8.60817	8.40966	8.42506	8.32784
1416227_at	6.59265	6.66349	6.7769	6.51096	6.98687	6.99066	6.77617	6.58354	6.83236	6.77617	6.8779	6.80794	6.62446	6.68478	6.80274	6.86769	6.77617
1416228_at	10.6667	10.6292	10.7109	10.7376	10.7789	10.7213	10.73	10.8117	10.8268	10.6988	10.6411	10.7177	10.7101	10.7159	10.629	10.6543	10.7253
1416229_at	9.24858	9.21778	9.28776	9.19293	9.18896	9.49099	9.37874	9.17549	9.28893	9.39169	9.0853	9.34648	9.26705	9.19596	9.32858	9.30267	9.32016
1416230_at	9.33982	9.48088	9.53648	9.43717	9.50125	9.58059	9.64168	9.4047	9.63626	9.60074	9.4674	9.61648	9.60738	9.66202	9.4887	9.55798	9.52913
1416231_at	6.654	6.61277	6.53295	6.44916	6.44916	6.44916	6.65881	6.49903	6.40735	6.52697	6.44916	6.39361	6.45726	6.34123	6.44916	6.25545	6.34513
1416232_at	8.23511	8.52641	8.24806	8.2187	7.87949	8.17295	8.21465	8.25996	7.91471	8.37554	8.13023	8.2187	8.2773	7.92071	8.25471	8.2187	8.2187
1416233_at	11.7997	11.8071	11.8193	11.8905	12.0081	11.8996	11.8316	11.8184	11.9252	11.8777	11.7165	11.9524	11.8833	11.9532	11.8457	11.9044	11.9012
1416234_at	10.2875	10.2049	10.1553	10.2986	10.1472	10.233	10.1499	10.3034	10.179	10.2362	10.0711	10.2391	10.162	10.1666	10.1873	10.1606	10.2636
1416235_at	9.2044	9.13571	9.17091	9.16363	9.09544	9.26067	9.1608	9.06081	9.10932	9.27011	8.97247	9.19464	9.20614	9.05826	9.06082	9.17944	9.08235
1416236_a_at	3.87283	3.90482	3.21236	4.41167	3.91696	4.51956	3.26596	4.85514	5.27808	4.186	3.94846	3.86412	3.8618	4.35923	3.66827	4.29677	3.99881
1416237_at	4.92299	4.82857	4.83342	5.19338	4.97204	5.50966	4.81731	5.04117	5.45307	5.04117	5.07353	5.08239	4.91175	5.37793	5.14898	5.36987	5.04117
1416238_at	5.9343	6.25145	5.73596	6.40793	5.99319	6.26593	6.172	5.91791	5.95463	5.90908	5.85946	6.03813	6.02627	5.911	6.1847	5.60182	5.72062
1416239_at	7.9834	8.1238	8.17316	7.95597	7.95692	8.10137	8.06291	8.09924	7.88851	8.06698	7.6329	7.94692	7.90286	7.89516	8.0983	7.79588	8.04577
1416240_at	12.0416	12.2117	12.321	12.1781	12.3066	12.3762	12.1819	12.2743	12.2695	12.2695	11.9705	12.2406	12.3319	12.1797	12.3284	12.2758	12.267
1416241_at	9.71751	9.73638	9.73623	9.80695	9.79148	9.78346	9.72951	9.78194	9.79601	9.73446	9.71294	9.8236	9.86321	9.8082	9.66565	9.66546	9.68354
1416242_at	7.16349	7.1758	7.15424	7.31424	7.35303	7.31847	7.19358	7.17997	7.27079	6.97566	6.79244	6.90261	7.01465	7.22256	7.09674	7.09314	7.15246
1416243_a_at	11.9647	12.1643	12.2825	12.2419	12.3913	12.2801	12.1872	12.1931	12.172	12.0485	12.0087	12.1571	12.3033	12.2589	12.2418	12.3204	12.1699
1416244_a_at	12.2613	12.2096	12.3317	12.3417	12.3229	12.3238	12.2061	12.2029	12.3787	12.215	12.0257	12.1788	12.2088	12.1712	12.2392	12.1905	12.1891
1416245_at	10.8473	10.8626	10.8955	10.9179	10.9791	10.9579	10.9467	10.897	10.9341	10.9068	10.799	10.9835	11.0713	10.9716	10.9965	10.9507	10.8992
1416246_a_at	10.8813	10.8743	10.9052	10.9813	10.8298	11.022	11.0809	10.7803	10.8162	10.8152	10.5841	10.7464	10.8508	10.5077	10.78	10.6712	10.7553
1416247_at	11.2278	11.2729	11.2593	11.2898	11.3311	11.3369	11.3082	11.3623	11.425	11.3731	11.2677	11.5008	11.37	11.3466	11.319	11.3287	11.347
1416248_at	10.1412	9.92479	10.0548	10.1836	10.1065	9.95272	10.1453	10.0237	10.0726	10.1724	10.216	10.2352	10.2827	10.2088	10.0683	10.1106	10.2001
1416249_at	8.72606	8.70548	8.90246	8.83571	8.9081	8.8315	8.89433	8.85099	8.90064	8.98258	8.82922	9.18922	8.96838	8.87385	9.0022	9.10913	8.91843
1416250_at	7.96657	8.12587	8.06143	7.92152	8.02064	7.93952	8.15105	7.82088	8.10982	7.98934	8.02004	8.19266	7.9473	8.27672	8.02692	7.95052	8.14859
1416251_at	8.70037	8.70171	8.60494	8.77834	8.58569	8.48696	8.66287	8.54161	8.60194	8.52898	8.51839	8.54858	8.60493	8.55079	8.61488	8.51702	8.5611
1416252_at	8.55049	8.40997	8.44962	8.45951	8.4243	8.44946	8.29203	8.57588	8.43287	8.45782	8.64792	8.42491	8.64779	8.54795	8.36003	8.44843	8.47121
1416253_at	9.731	9.74358	9.87541	9.88558	9.85893	9.90919	10.0262	9.84315	9.92632	9.85966	9.76083	9.7607	9.86074	9.75417	9.95449	9.88195	9.89627
1416254_a_at	8.79829	8.77486	8.64964	8.87432	8.70451	8.77862	8.71995	8.73	8.72785	8.73306	8.70518	8.5117	8.83547	8.57473	8.62543	8.67015	8.65703
1416255_at	5.60717	5.76222	5.68899	5.9964	6.02402	5.98398	5.89487	5.63834	6.06829	5.4669	5.82806	5.64889	5.64206	5.95784	5.51198	6.0011	5.88301
1416256_a_at	12.7078	12.7658	12.5961	12.6114	12.6391	12.7095	12.6147	12.6005	12.6927	12.6734	12.6128	12.6802	12.6112	12.4982	12.5351	12.6241	12.6957
1416257_at	9.18312	8.98473	8.94958	9.22915	8.95728	9.08774	8.9573	8.99872	8.98473	9.02303	8.80435	9.06676	8.99753	8.83685	8.93537	8.90332	8.99897
1416258_at	4.73269	4.9317	5.24174	5.42545	5.50169	5.18133	5.07625	5.21903	5.35281	5.00805	5.36844	5.50905	4.71909	5.47988	5.15242	5.06463	5.29348
1416259_at	7.26523	7.28696	7.3202	7.40009	7.21376	7.16805	7.21214	7.16182	7.0919	7.0369	6.86474	7.05277	7.30551	7.06039	7.19128	7.11555	7.21922
1416260_a_at	8.87026	8.88065	8.92944	9.08235	8.8158	8.93409	8.91282	8.90556	9.02745	9.05402	8.92067	8.95331	8.99727	9.13899	8.98043	8.89812	9.11919
1416261_at	8.73656	8.90063	8.80658	8.91745	8.77521	8.73246	8.81622	8.70005	8.75298	8.8895	8.64137	8.66808	8.89694	8.7003	8.72864	8.7654	8.75419
1416262_at	8.46971	8.5205	8.47946	8.5552	8.53325	8.58421	8.5303	8.42757	8.4537	8.62728	8.39688	8.7019	8.62867	8.36533	8.55081	8.50879	8.52763
1416263_at	7.15284	7.12796	7.07345	7.11921	7.11177	7.19997	7.17407	7.07978	7.11177	7.02711	7.1318	7.16875	7.26363	6.98373	7.04265	6.9564	7.12153
1416264_at	7.19845	7.2633	7.23875	7.08959	7.27415	7.36721	7.3336	7.20496	7.22993	7.38722	7.15944	7.0373	7.13859	7.29877	7.21876	7.36259	7.17553
1416265_at	7.61008	7.48537	7.62771	7.73163	7.68514	7.58821	7.59555	7.47082	7.54943	7.74757	7.57719	7.76702	7.58868	7.66632	7.63582	7.70915	7.59435
1416266_at	6.54669	6.37923	6.44446	6.52039	6.3425	6.2647	6.511	6.58153	6.5211	6.511	6.60319	6.511	6.74567	6.54	6.49446	6.54755	6.28179
1416267_at	10.5909	10.7221	11.1152	11.0348	10.6626	10.9985	11.1154	10.9262	10.98	10.7541	10.4918	10.6801	10.7989	10.5295	11.1116	10.9007	10.9759
1416268_at	10.6271	10.5809	10.4624	10.6318	10.3484	10.487	10.4745	10.4566	10.4222	10.6928	10.4831	10.5459	10.5894	10.2788	10.4087	10.5022	10.5399
1416269_at	11.7974	11.8706	11.9642	11.9701	12.0817	11.996	11.9709	12.0373	12.0358	11.8975	11.8064	12.0799	12.1311	12.1653	11.9659	11.9816	11.9816
1416270_at	11.0563	10.919	11.0393	11.0752	11.1367	11.0407	11.1646	11.0887	11.1455	11.0339	11.074	11.1513	11.1643	11.098	11.0094	11.0575	11.1227
1416271_at	6.16658	5.77771	6.14104	6.51225	6.05803	6.16658	5.95846	6.21365	6.95258	6.1748	6.14295	6.37894	6.23262	6.68257	5.97815	6.83236	6.1121
1416272_at	10.2211	10.1065	10.2584	10.2644	10.3545	10.2485	10.2711	10.3614	10.3231	10.2581	10.2693	10.2634	10.2623	10.2623	10.2321	10.1383	10.3278
1416273_at	6.53901	6.52355	6.53901	6.29004	6.53475	6.49874	6.47614	6.53901	6.67566	6.45277	6.81373	6.72972	6.76607	6.94638	6.56918	6.58069	6.39077
1416274_at	6.27876	6.25411	6.14531	6.18664	5.96398	6.26908	6.39541	6.14943	6.14086	6.19841	6.15495	5.89519	6.1683	6.30261	6.2202	6.19656	6.20686
1416275_at	7.44454	7.36904	7.24697	7.36904	7.24417	7.36904	7.41398	7.37616	7.5442	7.36604	7.32012	7.26336	7.36904	7.50672	7.36487	7.25035	7.34918
1416276_a_at	12.6153	12.6415	12.7813	12.7462	12.8191	12.796	12.7386	12.8557	12.8975	12.7103	12.6508	12.6664	12.7151	12.7811	12.705	12.7644	12.7525
1416277_a_at	13.6607	13.7231	13.7664	13.7341	13.8337	13.806	13.7674	13.7664	13.7863	13.6949	13.6404	13.767	13.8184	13.8352	13.8006	13.7539	13.7664
1416278_a_at	12.2765	12.2705	12.2861	12.4244	12.4045	12.4428	12.3579	12.2977	12.3234	12.276	12.0782	12.3506	12.3695	12.3512	12.4963	12.3797	12.4118
1416279_at	10.0889	10.1681	10.0879	10.1868	10.1305	10.1103	10.1546	10.095	10.0094	10.1274	10.1403	10.1274	10.0837	10.0818	10.1274	10.1351	10.0741
1416280_at	11.0939	11.1502	11.093	11.2119	10.9991	11.0939	11.0616	11.0766	11.1427	11.0994	11.01	11.0863	11.0946	11.025	11.0334	11.0566	11.1907
1416281_at	10.3763	10.3407	10.4362	10.4517	10.448	10.4945	10.4182	10.4442	10.4666	10.4917	10.4052	10.4427	10.5605	10.4242	10.3738	10.4803	10.4543
1416282_at	11.3804	11.3523	11.4458	11.445	11.5186	11.469	11.4818	11.45	11.526	11.363	11.2629	11.4283	11.5647	11.3999	11.4194	11.4927	11.4438
1416283_at	8.57574	8.60854	8.42478	8.61487	8.56321	8.59273	8.63615	8.50593	8.61683	8.80301	8.70078	8.69313	8.67562	8.62142	8.53425	8.58157	8.60446
1416284_at	9.63093	9.70592	9.72416	9.82264	9.76819	9.75324	9.77366	9.64812	9.6723	9.77816	9.69222	9.61223	9.81604	9.77211	9.7748	9.77181	9.7514
1416285_at	11.3315	11.3912	11.4601	11.4831	11.548	11.5085	11.447	11.4119	11.4927	11.4275	11.3069	11.5716	11.6551	11.5786	11.4462	11.4834	11.4661
1416286_at	11.108	11.0553	10.9558	11.0824	10.9213	11.1713	11.0043	11.0692	10.9973	11.0182	10.7473	10.974	10.9852	11.038	10.9811	11.0034	11.1612
1416287_at	10.1761	10.1549	10.1501	10.1442	10.1851	10.3673	10.1149	10.2539	10.2153	10.1391	9.98771	10.2459	10.1686	10.2417	10.057	10.1095	10.2337
1416288_at	12.0743	12.1231	12.1618	12.1543	12.1676	12.2322	12.1705	12.1087	12.196	12.2067	11.9781	12.3225	12.2875	12.1987	12.2466	12.1555	12.3071
1416289_at	7.5914	7.46717	7.50304	7.63948	7.52973	7.52311	7.55877	7.4826	7.52724	7.61786	7.5884	7.70306	7.39223	7.53837	7.55685	7.59539	7.71037
1416290_a_at	10.5335	10.3226	10.7525	10.9225	10.3175	10.6139	10.7214	10.7276	10.6537	10.5005	10.2301	10.3956	10.3629	10.2806	10.8949	10.3768	10.7645
1416291_at	10.3529	10.2515	10.2974	10.4247	10.353	10.3482	10.3535	10.2928	10.2836	10.362	10.1194	10.2449	10.2398	10.2452	10.2936	10.1836	10.272
1416292_at	10.4347	10.3749	10.4294	10.5618	10.4814	10.4962	10.5332	10.3734	10.4719	10.4672	10.2561	10.5129	10.5137	10.4719	10.4546	10.4719	10.4779
1416293_at	6.11404	6.2028	6.39928	6.05273	6.3529	6.20899	6.36479	6.27554	6.26902	6.29477	6.46692	6.54753	6.28875	6.41541	6.34925	6.34244	6.28875
1416294_at	9.0799	8.97645	8.86014	8.94643	8.84211	8.88107	8.94486	8.84645	8.98464	8.97415	9.0415	8.99128	8.95234	8.83348	8.72433	8.79342	8.94943
1416295_a_at	4.02769	4.03404	3.95843	4.08995	4.03536	4.193	3.94066	4.08016	4.26087	3.93803	4.02925	3.89275	4.02507	3.9766	4.15144	3.92699	4.02925
1416296_at	4.94747	5.13412	5.02506	4.83811	4.92342	5.06848	5.14477	5.06848	5.20568	4.98918	5.10096	5.08636	4.75759	5.02981	5.12254	5.06848	5.22159
1416297_s_at	4.78759	4.86394	4.89813	4.87421	5.21358	5.00204	4.93263	5.1415	5.04718	4.99202	4.86597	4.99369	4.88432	5.02042	5.06957	4.99202	4.99202
1416298_at	5.00524	5.12063	5.3539	4.96394	5.14545	4.92083	5.1438	5.19427	5.16607	4.95893	5.29071	5.0392	4.96908	5.30779	4.92543	5.11289	5.2622
1416299_at	4.80799	4.72298	4.75333	4.52863	4.89812	4.6884	4.55838	4.75129	4.75129	4.52931	4.95831	4.6964	4.97024	5.01574	4.72679	4.93946	4.60787
1416300_a_at	13.0515	12.9984	12.9613	13.0094	12.937	13.0018	12.9957	13.0536	12.9933	13.0476	12.9999	12.9933	13.0119	12.8958	12.9473	12.9789	13.0226
1416301_a_at	4.12205	3.90407	4.13118	4.22449	4.12756	4.00195	4.41336	4.50016	4.19955	3.97465	3.85671	3.75706	4.20788	4.08087	4.14769	3.93379	4.14538
1416302_at	4.66884	4.30805	4.44844	4.33764	4.28864	4.34639	4.49727	4.51407	4.37587	4.36305	4.45361	4.40721	4.52342	4.40721	4.2836	4.40802	4.31794
1416303_at	8.98311	8.86519	8.69298	8.81066	8.70721	8.94248	8.7059	8.73895	8.56889	8.73348	8.82278	8.85102	8.38529	8.44958	8.37834	8.38277	8.69677
1416304_at	8.56069	8.60169	8.48812	8.21678	8.36155	8.58157	8.39732	8.33849	8.39673	8.53945	8.6003	8.75035	8.33432	8.3986	8.19157	8.11597	8.37144
1416305_at	7.34627	7.34627	7.39252	7.38798	7.40436	7.29261	7.41672	7.41439	7.25397	7.38233	7.25069	7.26845	7.26783	7.09365	7.24844	7.45181	7.29748
1416306_at	3.71796	3.52291	3.7061	3.47177	3.83941	3.47435	3.53805	3.60264	3.64354	3.65189	3.68531	3.57436	3.6751	3.62508	3.64902	3.55262	3.62508
1416307_at	9.45328	9.42926	9.32589	9.3384	9.2274	9.35214	9.42746	9.26589	9.33632	9.34405	9.51895	9.46003	9.35263	9.34766	9.30083	9.36684	9.3254
1416308_at	8.87945	8.88269	8.81641	8.95425	8.73498	8.88587	8.94254	8.66644	8.7768	8.8	8.75837	8.93585	9.0693	8.97395	8.88269	8.80958	9.02456
1416309_at	5.00602	4.85023	4.86128	4.94771	5.07421	4.90589	4.74753	4.78914	4.79279	4.65735	5.08622	5.09546	4.88545	4.75763	4.66679	4.91479	4.71455
1416310_at	3.82446	3.78464	3.90777	3.63975	3.98533	3.90628	3.86777	3.90628	3.82854	4.10103	3.97831	3.90628	3.95298	3.93545	3.80811	4.02343	3.88513
1416311_s_at	7.88137	8.22223	8.26998	8.17119	8.32941	8.49162	8.44425	8.08691	8.22098	8.17822	8.17016	8.34374	7.86793	7.96217	8.59634	8.19305	8.45054
1416312_at	9.81524	9.80232	9.8509	9.97625	9.8833	9.90068	9.79681	9.85072	9.96796	9.68591	9.61995	9.8509	9.81098	9.99791	9.87283	9.74289	9.82896
1416313_at	12.2264	12.1352	12.2983	12.2622	12.1312	12.2318	12.2972	12.2687	12.2954	12.2471	12.0548	12.166	12.211	12.0209	12.201	12.2601	12.2033
1416314_at	6.10333	6.50057	6.52215	6.25059	6.5351	6.32595	6.21553	6.4176	6.42459	6.31116	6.40415	6.37954	6.47864	6.56642	6.44617	6.4176	6.31724
1416315_at	9.64505	9.56871	9.5712	9.63976	9.5937	9.63048	9.65799	9.61802	9.62617	9.7243	9.67367	9.72376	9.56317	9.65271	9.44318	9.61259	9.6908
1416316_at	6.45207	6.22754	6.2094	6.13415	5.81304	6.36439	6.21152	5.97605	6.17565	6.47207	6.06831	6.34041	6.29199	6.50624	5.99868	6.25374	6.16658
1416317_a_at	8.58015	8.29197	8.56313	8.41695	8.52495	8.58015	8.58523	8.52204	8.69767	8.48399	8.49099	8.50674	8.50674	8.22012	8.29342	8.5178	8.41731
1416318_at	7.07278	7.0366	6.92505	7.16617	7.05227	7.07801	7.13943	7.20346	6.81853	6.84644	6.8302	6.94839	6.78662	6.78953	6.8847	6.65878	6.94651
1416319_at	9.62016	9.70089	9.76522	9.81223	9.76158	9.72181	9.88142	9.75327	9.83961	9.69823	9.49377	9.7095	9.77859	9.86617	9.73928	9.71342	9.89032
1416320_at	7.68291	7.6194	7.81833	7.74016	7.70731	7.74125	7.6051	7.57041	7.78135	7.63973	7.64079	7.66126	7.79578	7.52317	7.61908	7.66126	7.6337
1416321_s_at	8.04695	8.04483	7.92928	8.23437	7.88792	8.27017	8.03064	8.07357	8.24461	8.17421	8.05697	8.24589	7.82896	8.15943	7.84928	8.39672	8.24257
1416322_at	7.91334	7.86702	8.03156	7.87281	7.93956	8.12655	7.90696	8.10953	8.24793	8.11751	8.06345	8.21516	7.95597	8.26766	7.77915	8.39527	8.13523
1416323_at	7.91859	7.88063	8.00567	8.11505	7.93733	8.02443	8.07827	7.979	7.979	8.04537	7.95037	7.89206	8.10392	8.10312	8.00314	7.8754	7.94405
1416324_s_at	8.07554	7.95769	7.85424	8.11014	7.77733	7.84121	7.89345	7.78732	7.66337	8.154	7.89642	7.94537	8.02694	7.92458	7.98193	7.81632	7.9077
1416325_at	3.42192	3.57363	3.39323	3.42192	3.53023	3.4896	3.42192	3.38475	3.57516	3.62349	3.35357	3.42953	3.38475	3.51496	3.42192	3.46605	3.39077
1416326_at	8.43126	8.32439	8.55309	8.83054	8.8745	9.00796	8.60126	8.98992	9.14607	8.50014	8.64058	8.8504	8.66152	9.04274	8.80867	8.65546	8.65605
1416327_at	11.0808	10.993	11.0851	11.1563	11.19	11.1246	11.1048	11.1297	11.1646	10.9956	10.9642	11.0268	11.1952	11.106	11.0427	11.0582	11.0058
1416328_a_at	9.10885	9.13388	9.27022	9.30387	9.3775	9.33229	9.21974	9.3989	9.3775	9.49148	9.41714	9.54409	9.60202	9.64836	9.32281	9.60195	9.39844
1416329_at	11.2288	11.1296	11.1281	11.1954	11.118	11.0503	11.1734	11.0663	11.0066	11.1223	11.003	10.9504	11.0793	10.7639	11.1778	11.06	11.0475
1416330_at	12.3512	12.4371	12.4051	12.3489	12.3706	12.4159	12.4238	12.3329	12.4398	12.372	12.3248	12.404	12.4136	12.3122	12.3126	12.3368	12.4155
1416331_a_at	10.0767	10.2508	10.1457	10.2013	10.2032	10.1812	10.1429	9.94432	10.0694	10.217	10.0833	10.2071	10.1412	10.2323	10.0206	10.1915	10.1442
1416332_at	9.0605	9.04052	9.30828	8.91128	9.24048	9.25729	9.26193	9.04025	9.28361	8.48687	8.44566	8.20315	8.93599	8.09854	8.57979	8.62587	8.43605
1416333_at	5.24884	5.39847	5.37765	5.33836	5.61002	5.54073	5.46935	5.6323	5.61889	5.52266	5.66195	5.50779	5.5391	5.58504	5.4426	5.67559	5.46842
1416334_at	7.93469	7.87579	7.77176	7.80177	7.8529	7.9092	7.80177	7.76744	7.79856	7.86063	7.64733	7.69237	7.80177	7.69228	7.73829	7.63076	7.87692
1416335_at	12.2313	12.111	12.1796	12.217	12.218	12.2787	12.1987	12.2032	12.2755	12.2008	12.1188	12.1576	12.2779	12.1176	12.1559	12.2008	12.2255
1416336_s_at	9.33296	9.31622	9.58234	9.6238	9.46524	9.6024	9.52909	9.59289	9.49842	9.45778	9.20024	9.48478	9.4115	9.36753	9.65007	9.35039	9.494
1416337_at	10.5034	10.4755	10.7306	10.7196	10.6533	10.6991	10.7508	10.7645	10.6481	10.6051	10.3242	10.5036	10.7442	10.5559	10.6763	10.594	10.6995
1416338_at	8.16579	8.29589	8.16893	8.15706	8.2203	8.00704	8.20951	8.11952	8.26642	8.36684	8.33992	8.18903	8.15821	8.21852	8.18903	8.18903	8.29823
1416339_a_at	9.64367	9.6199	9.67635	9.69768	9.56158	9.71902	9.66598	9.63328	9.69283	9.81234	9.81288	9.7675	9.81069	9.65293	9.6461	9.74295	9.76346
1416340_a_at	9.79938	9.6844	9.55494	9.65044	9.60192	9.6813	9.5924	9.60769	9.73769	9.6341	9.5723	9.59299	9.41132	9.44012	9.43189	9.67599	9.53948
1416341_at	9.82818	9.87854	9.88908	9.91548	9.86787	9.86369	9.85912	9.8711	9.91239	9.98828	9.94174	9.96485	9.94681	10.0004	9.83568	9.84445	9.95405
1416342_at	6.4138	6.50286	6.15158	6.39764	6.21279	6.3969	6.31618	6.43957	6.4662	6.36918	6.0643	6.43213	6.29651	6.36798	6.28618	6.36131	6.37552
1416343_a_at	8.06885	7.73845	8.03143	8.01699	8.09988	8.1185	8.03741	7.92006	7.96968	7.82561	7.37222	7.85518	7.77645	7.42563	7.93488	7.7483	8.06515
1416344_at	9.06829	8.94419	8.90136	8.99889	9.02421	9.07001	8.94098	8.96609	9.12553	8.84886	8.61148	8.96286	8.69795	8.72537	8.78638	8.73177	8.77372
1416345_at	9.07273	9.01424	9.1697	9.216	9.10865	9.18215	9.18925	9.05558	9.07245	9.14979	9.03525	9.24466	9.25729	9.25473	9.26489	9.21186	9.20968
1416346_at	7.73442	7.60294	7.78378	7.80309	7.78906	7.88158	7.99112	7.70788	7.89313	7.84135	7.76082	8.06359	8.04889	7.92648	7.93044	7.70628	7.97695
1416347_at	9.37795	9.29666	9.18873	9.34901	9.04912	9.1889	9.27958	9.35977	9.2455	9.30044	9.13785	9.20672	9.12895	8.99383	9.14523	9.09125	9.20871
1416348_at	7.82889	7.89272	7.69358	7.64527	7.69729	7.76732	7.73761	7.89707	7.74167	7.85822	7.52846	7.74935	7.77645	7.36955	7.74313	7.71081	7.63286
1416349_at	9.02469	8.81246	8.90056	8.98037	9.05293	8.97951	9.07906	9.14223	9.08944	9.11826	9.05533	9.19624	9.17956	9.30583	9.01812	8.96547	9.03525
1416350_at	8.33481	8.54985	8.58258	8.62479	8.24717	8.50711	8.48676	8.3105	8.4475	8.54566	8.23567	8.21525	8.59736	7.99266	8.47846	8.48279	8.52613
1416351_at	12.0318	12.0614	12.1106	12.0071	11.8277	11.9362	12.0103	12.0012	12.1111	12.0573	11.9963	11.9679	12.0007	11.7485	11.9875	11.9848	11.968
1416352_s_at	12.2501	12.3783	12.2139	12.2606	12.2932	12.3478	12.2696	12.2587	12.3211	12.3166	12.2574	12.4061	12.315	12.2234	12.178	12.284	12.3005
1416353_at	8.81194	8.77271	8.7024	8.77271	8.78346	8.86086	8.70986	8.77271	8.80304	8.75219	8.76808	8.8259	8.75467	8.77271	8.6121	8.69311	8.89296
1416354_at	9.67277	9.54874	9.62752	9.52246	9.39043	9.45297	9.56328	9.47372	9.54906	9.25971	9.20846	9.18239	9.41655	9.01612	9.22535	9.26928	9.36783
1416355_at	6.11404	6.05958	5.91647	6.14675	6.07158	5.72396	6.07719	6.33779	5.94316	6.72477	6.31801	6.11064	6.2867	6.10066	6.37643	6.01853	6.10066
1416356_at	8.38566	8.44604	8.3428	8.45255	8.37125	8.40227	8.34682	8.28219	8.40622	8.4101	8.25312	8.4633	8.45408	8.49988	8.25968	8.40227	8.43312
1416357_a_at	7.48514	7.57909	7.36987	7.41402	7.17656	7.57087	7.45754	7.32833	7.44638	7.27645	7.61619	7.38317	7.3732	7.49516	7.14007	7.12369	7.232
1416358_at	7.24753	7.29453	7.11472	7.10276	7.18832	7.14393	7.23813	7.17213	7.13791	7.24712	7.26908	7.15111	7.05227	7.09055	6.961	7.23317	6.99743
1416359_at	8.53112	8.56117	8.27409	8.35218	8.27294	8.3897	8.33567	8.49039	8.35218	8.35218	8.29785	8.42508	8.28095	8.34289	8.26521	8.31222	8.50712
1416360_at	6.1789	6.44916	6.37372	6.14222	6.40283	6.3736	6.26616	6.2526	6.28928	6.11116	6.2741	6.26814	6.5085	6.45739	6.35058	6.3114	6.30081
1416361_a_at	11.58	11.5276	11.7095	11.7162	11.5613	11.649	11.7334	11.6848	11.6498	11.568	11.438	11.4556	11.54	11.2433	11.5586	11.5702	11.5849
1416362_a_at	9.82004	9.79585	9.75252	9.95082	9.8257	9.9648	9.84643	9.70556	9.7868	10.0198	9.71355	9.96699	9.95586	9.98118	10.0011	9.81898	9.91827
1416363_at	5.8327	5.91231	5.79518	5.91231	6.1055	5.90646	5.83298	5.87784	5.97224	5.91297	6.02956	6.09155	5.91231	6.05392	6.04219	5.90576	5.94188
1416364_at	12.7597	12.6932	12.7178	12.7098	12.5747	12.7206	12.7017	12.5795	12.5683	12.7978	12.5579	12.7065	12.6217	12.4708	12.8145	12.673	12.6238
1416365_at	12.6393	12.5877	12.5877	12.5502	12.5742	12.6099	12.6423	12.4729	12.5531	12.7018	12.6444	12.6028	12.5877	12.2042	12.5171	12.5978	12.4435
1416366_at	11.9181	11.8843	12.1262	12.0396	12.0166	12.0718	12.0642	12.289	12.3234	12.0384	12.0146	12.0576	12.1579	12.2178	11.9046	12.0523	12.0642
1416367_at	9.4797	9.48008	9.59408	9.70503	9.6861	9.56441	9.56305	9.68599	9.7114	9.53473	9.47467	9.76597	9.46886	9.72326	9.60684	9.39197	9.61595
1416368_at	9.98712	10.141	10.0343	10.2553	10.3087	10.2137	10.1271	10.3002	10.2792	10.1393	10.0066	10.2841	10.1786	10.2374	10.1567	10.1565	10.1329
1416369_at	9.74886	9.69675	9.69176	9.69736	9.64572	9.62535	9.69556	9.5893	9.65649	9.70576	9.55324	9.77694	9.81355	9.67631	9.6741	9.69176	9.81154
1416370_at	7.4386	7.49808	7.38771	7.67594	7.5703	7.57433	7.46214	7.50745	7.39397	7.60893	7.27224	7.47221	7.58325	7.54917	7.26125	7.5502	7.4912
1416371_at	11.2769	11.276	11.1976	11.532	11.4899	11.8216	11.2673	11.6754	11.8641	11.2055	11.5144	11.4668	11.0389	11.5945	11.1938	11.5775	11.5324
1416372_at	10.0515	10.1015	10.03	10.112	10.2314	10.1708	10.0471	9.96301	10.0275	10.1015	10.0261	10.2244	10.212	10.0962	10.1649	10.1698	10.1516
1416373_at	9.44878	9.40601	9.51528	9.60082	9.38217	9.50738	9.48513	9.44223	9.47791	9.51488	9.52363	9.47791	9.58351	9.32475	9.47451	9.32869	9.5604
1416374_at	8.47371	8.37218	8.6114	8.47931	8.56545	8.50949	8.3895	8.48185	8.39525	8.52823	8.43911	8.654	8.53142	8.53945	8.52158	8.64575	8.56538
1416375_at	8.00959	7.82857	7.90132	7.97068	7.86253	7.85112	7.66177	7.98007	7.97108	7.93274	7.90132	7.90132	8.07651	7.88197	7.90132	7.80489	7.9077
1416376_at	6.61751	6.76841	6.68123	6.86113	7.02296	6.90893	6.81366	6.72662	6.78094	6.66293	6.76685	6.72867	6.78094	6.78094	6.72842	6.55215	6.83451
1416377_at	8.08567	8.28057	8.24812	8.19481	7.93467	8.12063	8.05422	7.88304	7.86851	8.1921	7.95618	7.99827	8.05525	7.93993	8.03211	8.05186	8.05186
1416378_at	7.62346	7.45298	7.57306	7.65917	7.47587	7.54644	7.46424	7.48755	7.60253	7.56785	7.37122	7.45487	7.51232	7.37771	7.35117	7.30132	7.3387
1416379_at	8.6796	8.75778	8.67135	8.5623	8.69922	8.80967	8.61484	8.46881	8.63235	8.80341	8.62745	8.72958	8.7467	8.5367	8.49387	8.68596	8.66336
1416380_at	5.00626	5.09257	5.06901	5.09257	5.18805	5.09257	5.09257	5.29106	5.18562	4.78476	5.07281	5.23003	4.82398	5.10027	5.00211	5.14339	5.16748
1416381_a_at	11.0613	11.2046	11.2567	11.3145	11.2388	11.2883	11.3264	11.2814	11.3344	11.3198	11.2625	11.2317	11.2807	11.258	11.2777	11.297	11.2777
1416382_at	7.75201	7.50279	7.36154	7.65509	7.58356	7.88885	7.6239	7.72569	7.8758	7.58184	7.46536	7.65579	7.60639	7.74703	7.36776	7.54661	7.59111
1416383_a_at	8.96851	8.94118	8.82051	8.84273	8.57949	8.77792	8.89429	8.74995	8.70349	8.79913	8.70034	8.68939	8.67991	8.66548	8.65471	8.62818	8.89112
1416384_a_at	10.6154	10.5802	10.6402	10.6406	10.7012	10.6444	10.6678	10.735	10.8421	10.6667	10.6606	10.6534	10.7132	10.6352	10.601	10.6334	10.5653
1416385_a_at	10.3052	10.3825	10.4203	10.4814	10.3332	10.4538	10.409	10.1895	10.3448	10.2852	10.1494	10.3807	10.4951	10.3392	10.4763	10.3675	10.4416
1416386_a_at	9.69146	9.83104	9.8244	9.82026	9.85916	9.91746	9.85462	9.78522	9.93353	9.90272	9.80197	9.99448	9.96883	9.91573	9.81978	9.85462	9.86144
1416387_at	11.2815	11.5119	11.4083	11.4328	11.3857	11.3994	11.4196	11.1248	11.2128	11.4766	11.3639	11.4038	11.3886	11.1987	11.3827	11.3515	11.374
1416388_at	8.96528	9.14185	9.27603	9.14185	9.23975	9.14498	9.15932	9.09851	9.14864	9.20512	9.04072	9.18961	9.17353	8.96159	9.1866	9.14273	8.91019
1416389_a_at	8.20722	8.28152	8.24546	8.26356	8.25247	8.39175	8.34008	8.15051	8.20184	8.25275	7.94313	8.33987	8.43641	8.2558	8.35209	8.12681	8.23314
1416390_at	7.23393	7.37491	7.34052	7.42898	7.21283	7.35771	7.30492	7.37374	7.43859	7.31676	7.12213	7.14027	7.47321	7.28595	7.39197	7.00665	7.23124
1416391_at	7.07448	7.43237	7.19476	7.3612	7.25581	7.14324	7.24641	7.00606	6.98351	7.38925	7.26937	7.10909	7.47079	7.24585	7.32644	7.416	7.05806
1416392_a_at	13.4191	13.5103	13.3815	13.38	13.3605	13.4294	13.4373	13.4248	13.4103	13.4798	13.434	13.4105	13.413	13.1919	13.4006	13.4542	13.4052
1416393_at	9.97872	10.0103	10.0761	10.1515	10.1285	10.1047	10.1984	10.1458	10.2131	10.1041	10.0266	10.1331	10.2232	10.3405	10.1373	10.0249	10.1381
1416394_at	10.2761	10.4185	10.4099	10.4654	10.469	10.6048	10.4289	10.2491	10.3913	10.4626	10.1933	10.4447	10.5474	10.4242	10.5513	10.5019	10.4717
1416395_at	10.5134	10.6373	10.7281	10.7957	10.8952	10.8365	10.6998	10.6127	10.6346	10.757	10.5914	10.7403	10.85	10.7503	10.8249	10.6948	10.7265
1416396_at	5.22767	5.30229	5.39634	5.4273	5.30229	5.29676	5.30229	5.0417	5.30229	5.22459	5.44738	5.27191	5.08775	5.40472	5.31286	5.32555	5.50901
1416397_at	7.09085	7.48071	7.35303	7.26723	7.35303	7.29673	7.36247	7.25808	7.35303	7.25552	7.35303	7.31078	7.46804	7.47268	7.49195	7.52185	7.34894
1416398_at	4.69955	4.80362	4.5775	4.37787	4.93454	4.73303	4.49643	4.55327	4.29644	4.63257	4.68681	4.67506	4.73203	4.7419	4.95285	4.76706	4.65764
1416399_a_at	10.6765	10.7022	10.7565	10.8518	10.8361	10.768	10.7341	10.7341	10.7585	10.7298	10.646	10.7341	10.7209	10.6052	10.7161	10.7103	10.7777
1416400_at	7.90336	7.80605	7.66116	7.90057	7.89307	7.89307	7.86022	7.84739	7.85662	8.0923	7.81147	8.16945	8.22884	8.09748	7.73119	7.85847	7.97822
1416401_at	8.7651	8.72658	8.7211	8.7744	8.63818	8.88126	8.61219	8.72658	8.81385	8.88501	8.61542	8.91493	8.49022	8.77275	8.59362	8.49101	8.68758
1416402_at	8.41149	8.37118	8.32606	8.24571	8.28533	8.32924	8.27671	8.34578	8.3248	8.28446	8.30416	8.47381	8.31162	8.2884	8.24865	8.15906	8.29763
1416403_at	7.64187	7.83327	7.76855	7.52701	7.65964	7.83266	7.74314	7.37045	7.71359	7.71359	7.8072	7.80289	7.94512	7.66815	7.65092	7.55726	7.77992
1416404_s_at	12.385	12.5023	12.5791	12.585	12.6672	12.6128	12.5699	12.5905	12.6487	12.534	12.447	12.6376	12.5853	12.6292	12.5352	12.6052	12.6207
1416405_at	8.14359	8.21754	7.78382	8.25365	7.98452	8.61113	8.13762	8.37638	8.43532	8.09775	8.1975	8.22095	7.79261	8.22929	8.09987	8.19484	8.16529
1416406_at	11.5345	11.4788	11.4873	11.582	11.6204	11.6067	11.5973	11.4211	11.4368	11.4622	11.4699	11.5234	11.5242	11.5692	11.5442	11.4222	11.5095
1416407_at	12.4853	12.4277	12.5008	12.5097	12.5943	12.5648	12.5538	12.4751	12.5593	12.5665	12.4252	12.691	12.647	12.4635	12.524	12.5854	12.5393
1416408_at	10.5777	10.492	10.4907	10.5403	10.3805	10.4693	10.4637	10.5854	10.5238	10.5453	10.4334	10.4461	10.4265	10.3161	10.293	10.4664	10.4521
1416409_at	10.1643	10.1349	10.2099	10.112	10.1729	10.1864	10.233	10.0023	10.0985	10.2433	10.033	10.1643	10.2183	9.96411	10.1292	10.1845	10.1793
1416410_at	7.68216	7.89789	7.88941	7.94021	7.88881	8.1161	7.84017	7.91826	7.97877	7.74479	7.65661	8.1105	7.92287	7.97659	8.02005	7.76875	7.97054
1416411_at	5.31595	5.16823	5.25969	5.37535	5.38481	5.48634	5.26912	5.56984	5.79892	4.8659	5.33066	5.53507	5.22817	5.50821	5.12081	5.58815	5.37535
1416412_at	7.2216	7.03563	6.93552	7.16038	6.80991	6.93718	6.94784	7.07785	6.87073	7.07888	6.80923	6.63678	7.00289	6.72446	7.0444	6.81845	6.9688
1416413_at	3.37122	3.44338	3.44682	3.5232	3.56254	3.50375	3.55106	3.48126	3.56558	3.43803	3.55612	3.63002	3.3623	3.74211	3.49769	3.73732	3.4393
1416414_at	5.29337	4.98195	4.94589	5.36	5.10982	5.51243	5.16496	5.41796	5.54754	5.02962	5.31306	5.53861	5.3673	5.57075	5.15934	5.31164	5.223
1416415_a_at	12.3089	12.2257	12.3104	12.3733	12.3148	12.3557	12.357	12.3148	12.3148	12.3523	12.1659	12.3404	12.3513	12.2845	12.3145	12.2855	12.3695
1416416_x_at	11.1649	11.1875	11.2015	11.1573	11.151	11.2961	11.2113	11.296	11.2275	11.1858	11.1736	11.3886	11.1744	10.9718	11.0044	11.2671	11.2629
1416417_a_at	11.718	11.7177	11.6744	11.7951	11.8286	11.8066	11.7585	11.7879	11.8205	11.7169	11.6894	11.818	11.8165	11.8439	11.6866	11.7489	11.9002
1416418_at	11.9061	11.9943	12.1517	12.0672	12.0584	12.1094	12.1438	12.0404	12.0725	12.063	11.8844	11.9191	12.1267	11.8368	12.0606	12.0384	11.9753
1416419_s_at	13.1546	13.1979	13.1777	13.2036	13.1892	13.2161	13.175	13.0889	13.1718	13.2093	13.1821	13.2044	13.2322	13.1082	13.1236	13.178	13.1409
1416420_a_at	13.2949	13.2222	13.3954	13.3469	13.3156	13.3503	13.3737	13.4202	13.4125	13.2994	13.2196	13.3168	13.3611	13.3469	13.3436	13.323	13.3923
1416421_a_at	8.50352	8.54601	8.75415	8.90366	8.55485	8.73928	8.80706	8.59654	8.59654	8.42079	8.25451	8.37405	8.52363	8.3748	8.87169	8.37602	8.66434
1416422_a_at	8.95546	8.75945	9.16293	9.31211	8.57024	8.99699	8.96757	8.90712	8.79651	8.58506	8.23861	8.4858	8.82248	8.34155	8.82248	8.5639	8.97651
1416423_x_at	8.41992	8.55139	8.63329	8.71225	8.36819	8.55375	8.62104	8.48177	8.44817	8.33877	8.24409	8.21465	8.33748	8.38592	8.54181	8.07879	8.52627
1416424_at	7.66886	7.82393	7.76564	7.6574	7.75898	7.75828	7.63116	7.61247	7.76089	7.90345	7.78467	7.90345	7.91943	7.99085	7.7055	7.9115	7.74618
1416425_at	9.55913	9.45921	9.61674	9.62304	9.61273	9.61273	9.70524	9.62401	9.67592	9.60295	9.5766	9.59904	9.61273	9.5525	9.46152	9.60349	9.59924
1416426_at	11.2306	11.3916	11.5322	11.4514	11.361	11.5327	11.4931	11.4975	11.4541	11.348	11.1503	11.3219	11.2651	11.2009	11.5596	11.461	11.4284
1416427_at	12.605	12.7104	12.5965	12.573	12.5347	12.6368	12.5852	12.2744	12.407	12.579	12.3619	12.6277	12.5759	12.4629	12.5909	12.5771	12.7238
1416428_at	9.07076	9.18623	9.23873	9.22224	9.13377	9.18623	9.33915	9.12681	9.18084	9.35623	9.14591	9.08219	9.19673	9.10261	9.19562	9.26047	9.236
1416429_a_at	8.68974	8.28057	8.81642	8.90694	8.3406	8.6367	8.82855	8.86707	8.68773	8.57372	8.55199	8.46223	8.42086	8.37606	8.56858	8.51097	8.71019
1416430_at	8.87886	8.89326	9.00459	9.00241	8.72596	8.95034	9.0582	8.7163	8.85513	8.74282	8.5668	8.69718	8.63312	8.63873	8.88122	8.8401	8.97734
1416431_at	4.82868	4.7795	4.87764	4.87764	4.97206	4.96455	4.91912	4.87764	4.91689	4.79839	5.06446	4.62516	4.72035	4.87764	4.78907	4.88545	4.8011
1416432_at	7.42988	7.52242	7.62045	7.57148	7.34771	7.40143	7.53404	7.28283	7.23681	7.89364	7.72265	7.55066	7.70124	7.45764	8.00177	7.48233	7.87309
1416433_at	7.07156	7.04714	7.14817	7.07322	7.21683	7.1349	7.12084	7.18373	7.28817	7.35303	7.11407	7.0754	7.50181	7.27573	6.83502	7.4029	7.00479
1416434_at	4.1345	4.10912	4.1345	4.1345	4.16566	3.98903	4.21231	3.91668	4.09943	3.91824	4.26001	4.18922	3.75783	4.09068	4.42246	4.33369	4.24847
1416435_at	6.6982	6.74109	6.96828	6.92466	6.90037	6.86215	6.75661	6.73401	6.85275	6.64715	6.761	7.08773	6.52034	7.12366	6.88232	6.80226	6.72007
1416436_a_at	8.8168	8.76966	8.96347	8.98021	9.00592	9.00137	9.03438	8.98642	8.96036	8.93009	8.80725	9.01991	8.95334	8.98796	8.9254	8.89037	8.90378
1416437_a_at	10.2526	10.2541	10.3269	10.2129	10.3947	10.4542	10.2928	10.2435	10.1547	10.4103	10.2191	10.4152	10.3646	10.0454	10.3062	10.425	10.0448
1416438_at	11.0975	11.0803	10.9695	11.0815	11.0499	11.0924	11.0715	10.8577	10.9886	11.0197	10.9038	10.9818	11.1138	10.9082	11.0239	10.957	10.9845
1416439_at	8.36597	8.23222	8.49223	8.55471	8.6026	8.47076	8.4537	8.55042	8.51304	8.50409	8.528	8.49983	8.47076	8.51883	8.47021	8.51013	8.44157
1416440_at	10.332	10.332	10.2959	10.4463	10.166	10.417	10.2146	10.3773	10.4475	10.3685	10.1526	10.4334	10.3104	10.217	10.2907	10.2718	10.3771
1416441_at	7.42851	7.54445	7.41788	7.89974	7.55985	7.92006	7.42882	7.75434	7.85662	7.44355	7.36173	7.83073	7.8297	7.75869	7.58956	7.59316	7.71463
1416442_at	7.20405	7.19846	7.08235	7.07322	7.04527	7.29936	7.23689	6.96944	7.06001	7.25732	7.43024	7.30559	7.4493	7.28371	7.38697	7.24671	7.365
1416443_a_at	10.5528	10.5772	10.5684	10.5948	10.5439	10.6165	10.5679	10.4852	10.5855	10.648	10.5389	10.6568	10.59	10.55	10.5289	10.5221	10.5585
1416444_at	7.02535	6.75354	7.27616	7.34354	6.85397	7.20387	7.19192	6.96733	7.04119	6.99146	6.58937	6.91443	6.96733	6.74324	7.09813	6.6593	6.95441
1416445_at	9.44776	9.37389	9.30788	9.3659	9.27954	9.35123	9.32334	9.34047	9.28666	9.34171	9.20736	9.32269	9.28244	9.27726	9.2981	9.24127	9.34434
1416446_at	11.4855	11.2319	11.6247	11.527	11.4087	11.3736	11.6787	11.5132	11.395	11.3742	11.09	11.2362	11.2937	11.2929	11.5799	11.3946	11.4087
1416447_at	11.1233	11.0154	11.5023	11.2946	11.025	11.2041	11.3234	11.1844	11.1374	11.1523	10.8285	11.0523	11.1931	10.8651	11.4054	11.2107	11.3351
1416448_at	9.24947	9.28299	9.32165	9.35214	9.36829	9.27139	9.38743	9.32334	9.43644	9.35858	9.15104	9.43631	9.55576	9.32165	9.29411	9.32165	9.26513
1416449_x_at	6.84371	6.81922	6.87274	7.02215	7.05607	6.77009	6.87108	6.85379	6.93363	6.71224	6.9518	6.53321	6.95302	6.90703	6.82189	6.87274	6.84816
1416450_at	5.47979	5.64807	5.71025	5.67068	5.52143	5.79691	5.79627	5.49785	5.38382	5.57051	5.7472	5.33123	5.81797	5.55593	5.63686	5.62018	5.6217
1416451_s_at	6.99288	7.08561	6.77952	7.06077	6.78193	6.82039	6.87761	6.97658	6.84731	6.95386	6.79762	6.75603	6.98967	6.85439	7.17079	6.83484	6.96214
1416452_at	10.371	10.3345	10.3768	10.4136	10.3393	10.46	10.4036	10.4412	10.4729	10.4136	10.286	10.3715	10.3583	10.5349	10.4245	10.4238	10.4861
1416453_x_at	11.3779	11.3763	11.4409	11.483	11.6751	11.5643	11.4944	11.4912	11.5444	11.5066	11.3593	11.6417	11.4308	11.5034	11.6627	11.4991	11.4446
1416454_s_at	9.11513	9.27827	9.15049	10.0714	9.80888	10.605	9.88033	10.2181	10.3124	9.2284	9.82058	9.91116	9.69843	10.6316	10.0253	9.96558	9.91473
1416455_a_at	10.3712	10.2812	10.0963	10.1769	10.2446	10.3545	10.3148	10.3712	10.2294	10.6613	10.4962	10.7756	10.2996	10.3565	10.191	10.2063	10.4512
1416456_a_at	5.89444	5.89125	5.7478	5.56365	5.85306	6.03152	5.7085	5.86592	5.79961	5.93936	5.9181	6.05083	5.85593	5.87802	5.73554	6.06972	5.75078
1416457_at	8.11889	8.28542	8.33248	8.33888	8.34733	8.44811	8.40477	8.45831	8.47746	8.07787	8.34541	8.35849	8.35059	8.46483	8.295	8.24206	8.16912
1416458_at	8.9593	8.91654	9.00418	9.19313	9.07513	9.07717	8.99937	9.02967	9.01655	8.90535	8.81989	8.92294	8.9822	9.09406	8.90984	8.86756	8.98122
1416459_at	8.57081	8.31961	8.54471	8.47857	8.62642	8.73127	8.55811	8.59801	8.69514	8.47974	8.34662	8.60652	8.61972	8.46307	8.40715	8.51587	8.41869
1416460_at	3.89591	3.97552	4.03346	3.91683	4.06794	4.18135	4.11402	4.06794	4.2292	4.02403	4.20313	4.26821	3.96363	4.21819	4.06794	4.08	4.0548
1416461_at	10.6795	10.6669	10.6622	10.58	10.5445	10.6505	10.7123	10.6076	10.7014	10.7941	10.5341	10.8325	10.7331	10.7272	10.6617	10.6537	10.8047
1416462_at	10.9913	11.1052	10.9517	10.9442	10.8573	10.968	11.0432	10.7943	10.9048	11.0023	10.8659	11.1411	11.0012	10.9462	11.0858	10.9807	11.1269
1416463_at	8.66641	8.77564	8.8335	8.7023	8.6826	8.74983	8.76506	8.84755	8.66786	8.86344	8.78133	8.86629	8.90466	8.81905	8.67083	8.79329	8.97451
1416464_at	4.01061	3.94225	4.18765	4.04576	4.21459	4.08183	4.06241	4.11595	4.05332	4.06241	4.06128	4.29594	3.86285	4.28201	4.06241	4.03447	4.16496
1416465_a_at	11.3127	11.1504	11.3258	11.3556	11.0697	11.2059	11.3502	11.4191	11.2603	11.2572	10.9601	11.0804	11.2131	10.9305	11.1396	11.0484	11.2882
1416466_at	12.2096	12.1305	12.1541	12.1821	11.9405	12.1384	12.1982	12.2479	12.0997	12.0796	11.8678	12.0628	12.0079	11.8765	12.0205	12.0308	12.0769
1416467_at	10.6053	10.6372	10.5519	10.5239	10.6452	10.6491	10.592	10.6502	10.5991	10.5299	10.4499	10.5132	10.5082	10.3295	10.4632	10.5371	10.5311
1416468_at	10.3668	10.2652	10.4133	10.477	10.4142	10.4515	10.5975	10.4142	10.4352	10.3569	10.2529	10.439	10.3464	10.4009	10.3907	10.5206	10.4386
1416469_at	9.88646	9.73995	9.84026	9.8896	9.81544	9.7529	9.9435	9.85132	9.85683	10.0025	10.0042	9.87654	9.93769	9.93664	9.87316	9.81579	10.0207
1416470_a_at	10.5086	10.4523	10.3945	10.435	10.3623	10.458	10.3851	10.3745	10.5089	10.5041	10.4241	10.4038	10.439	10.5359	10.2759	10.4268	10.4072
1416471_at	10.4809	10.2494	10.2835	10.4393	10.442	10.4153	10.3561	10.3744	10.386	10.4503	10.1888	10.4861	10.4631	10.4809	10.4041	10.4112	10.4665
1416472_at	9.43398	9.19937	9.31432	9.3827	9.29332	9.30613	9.45262	9.29625	9.33519	9.30989	9.13345	9.20528	9.30368	9.16217	9.26965	9.26756	9.34754
1416473_a_at	9.12075	9.01882	9.00103	9.01587	8.85869	9.03172	9.09965	9.27454	9.1665	8.995	8.91941	9.01882	8.94286	8.90121	8.77656	8.6112	9.12188
1416474_at	8.94687	8.85309	8.78852	8.83723	8.67982	8.87537	8.81478	9.02229	8.6514	8.67103	8.57795	8.86097	8.59074	8.65266	8.74735	8.50159	8.84334
1416475_at	8.77846	8.91128	9.01122	8.98784	8.83635	9.06558	9.03379	8.75403	8.73384	8.911	8.55384	8.90072	8.94617	8.67524	9.11541	8.88736	8.8883
1416476_a_at	10.7028	10.6413	10.9279	10.9434	10.6226	10.8084	10.9193	10.817	10.7006	10.6763	10.3744	10.2566	10.7532	10.4154	10.9151	10.7655	10.8755
1416477_at	11.35	11.365	11.4301	11.3965	11.3281	11.4204	11.3986	11.2226	11.2528	11.4078	11.1426	11.2901	11.3944	11.1702	11.3527	11.3574	11.4031
1416478_a_at	12.6041	12.6184	12.4745	12.5197	12.4925	12.5307	12.506	12.524	12.5174	12.5791	12.4102	12.5491	12.4801	12.2517	12.48	12.4964	12.5109
1416479_a_at	8.95211	9.16258	9.14175	9.16018	9.26329	9.24115	9.16834	9.03091	9.17208	9.24351	9.15581	9.35648	9.31272	9.26667	9.28421	9.20474	9.22438
1416480_a_at	10.6273	10.7472	10.9289	10.9506	10.9101	10.9759	10.9892	10.9819	11.0168	10.8995	10.5565	10.7372	10.9853	10.8183	10.9656	10.9064	10.8239
1416481_s_at	10.3178	10.2329	10.3908	10.4158	10.1796	10.3163	10.3337	10.2845	10.2913	10.3473	10.0959	10.2303	10.4439	10.3231	10.4405	10.248	10.3306
1416482_at	9.94653	9.86354	9.70414	9.71962	9.86497	9.82632	9.74304	9.56623	9.71589	9.70403	9.63708	9.75541	9.7892	9.76502	9.84547	9.69023	10.0942
1416483_at	12.4756	12.4954	12.3242	12.4389	12.3955	12.3653	12.3745	12.3028	12.3404	12.4046	12.2062	12.3738	12.3615	12.2723	12.4367	12.4054	12.4211
1416484_at	11.9032	11.8366	11.8521	11.7803	11.8201	11.8645	11.8235	11.7919	11.7739	11.8201	11.6481	11.8136	11.7859	11.5125	11.9209	11.8099	11.9068
1416485_at	11.214	11.213	11.2681	11.3676	11.4274	11.3152	11.3521	11.1733	11.2691	11.1989	11.1869	11.2542	11.2939	11.3459	11.3715	11.2991	11.3245
1416486_at	10.2164	10.1272	10.1802	10.2559	10.395	10.2346	10.3112	10.1938	10.2394	10.2442	10.0753	10.1779	10.3973	10.2818	10.2332	10.1611	10.2431
1416487_a_at	6.22232	6.19013	6.21255	6.26177	6.21866	6.0987	6.07719	6.26113	6.21896	6.34842	6.2369	6.30839	6.46345	6.52387	6.50841	6.22232	6.18073
1416488_at	9.64366	9.64628	9.61172	9.72775	9.50543	9.62346	9.72247	9.58521	9.61933	9.73762	9.52342	9.57568	9.71072	9.57038	9.72487	9.76508	9.69085
1416489_at	6.6978	6.63823	6.72735	6.9351	6.72168	6.86047	6.80699	6.74802	6.63334	6.5799	6.57701	6.70983	6.74291	6.74802	6.76402	6.74802	6.8361
1416490_at	3.42924	3.45097	3.62008	3.60156	3.59422	3.56112	3.62769	3.78428	3.7221	3.6713	3.59394	3.94558	3.56707	3.70169	3.65018	3.53579	3.41415
1416491_at	9.76785	9.96034	9.83611	9.74207	9.67253	9.75773	9.7185	9.60134	9.56614	9.91762	10.0055	9.76708	9.97251	9.53873	9.92164	9.87994	9.68252
1416492_at	7.86777	7.90272	7.92572	7.91861	7.6886	7.93818	7.96959	7.89135	7.80697	8.00491	7.80306	7.8057	7.74967	7.79	8.09004	7.61327	7.89777
1416493_at	10.2436	10.2497	10.3238	10.1803	10.2848	10.307	10.3721	10.0664	10.3373	10.2921	10.3081	10.3718	10.3013	10.3284	10.2745	10.218	10.29
1416494_at	11.6232	11.6999	11.6568	11.7807	11.8159	11.7477	11.7121	11.71	11.7545	11.6835	11.4722	11.802	11.7129	11.7292	11.7385	11.7312	11.7025
1416495_s_at	11.0403	11.1885	11.385	11.397	11.3621	11.3736	11.4344	11.3055	11.3597	11.3198	11.0182	11.2903	11.4089	11.2617	11.4613	11.4265	11.3483
1416496_at	12.9181	12.9436	12.9737	13.0395	12.9347	12.9526	12.923	12.9214	12.893	12.967	12.7873	12.8777	12.8819	12.796	13.0087	12.9277	12.9274
1416497_at	6.05948	6.191	6.14531	5.93284	6.16996	6.30205	6.3673	6.1441	6.38363	6.21691	6.02539	6.3629	6.31126	6.58917	6.23769	6.40482	6.37586
1416498_at	6.33311	6.13675	6.00846	6.26547	6.28819	6.32802	6.08375	6.31956	6.42272	6.40388	6.19039	6.45591	6.38362	6.46003	6.31956	6.3598	6.45054
1416499_a_at	10.9172	10.6099	10.9932	11.0758	10.9584	10.9777	11.0312	11.0798	10.9765	10.8036	10.7029	10.7802	10.7595	10.6032	11.0859	10.8168	10.9292
1416500_at	10.3117	10.2492	10.2957	10.4521	10.3251	10.3337	10.2968	10.4145	10.276	10.379	10.228	10.3643	10.3795	10.2956	10.3297	10.2909	10.4983
1416501_at	9.46215	9.27313	9.21607	9.32607	9.06823	8.91937	9.2938	9.20461	9.10421	9.19225	9.1344	8.89421	9.07691	9.10457	9.23175	9.08479	9.27681
1416502_a_at	9.32021	9.19551	9.28	9.25376	9.27527	9.25878	9.27139	9.45864	9.20537	9.38374	9.44477	9.37006	9.31627	9.41857	9.18032	9.24428	9.21434
1416503_at	11.2717	11.2233	11.1909	11.3566	11.3152	11.2814	11.3484	11.265	11.2115	11.2655	11.079	11.2821	11.1838	10.9755	11.1889	11.1063	11.3437
1416504_at	7.60427	7.74554	7.72666	7.66294	7.61057	7.69926	7.71502	7.42683	7.37594	7.74482	7.60648	7.63166	7.6812	7.46032	7.85882	7.72097	7.57144
1416505_at	10.0091	10.111	10.0389	9.9486	9.8325	10.2874	10.2058	9.84519	9.79156	10.3116	10.5435	10.2827	10.1512	10.184	10.4017	10.4968	10.4906
1416506_at	11.2446	11.181	11.2533	11.3007	11.3084	11.3061	11.2329	11.3055	11.2392	11.2408	11.0287	11.1954	11.2351	11.1275	11.2381	11.3043	11.2446
1416507_at	4.00951	3.99846	4.30573	4.13786	4.07509	3.98838	4.2006	4.00951	4.1246	4.00951	3.89861	3.8471	4.00951	3.87721	3.81481	3.97728	3.93843
1416508_at	10.6138	10.6081	10.6651	10.7352	10.7951	10.6925	10.6847	10.7222	10.7278	10.6842	10.6379	10.8152	10.6699	10.8024	10.6626	10.7442	10.8146
1416509_at	10.3718	10.1804	10.3096	10.3274	10.2511	10.3259	10.3745	10.3537	10.3075	10.2696	10.1576	10.3071	10.2585	10.1594	10.2728	10.2935	10.338
1416510_at	9.40651	9.41439	9.35967	9.44481	9.38399	9.3862	9.44362	9.28665	9.26552	9.51562	9.37239	9.37304	9.4909	9.35106	9.39941	9.39941	9.4395
1416511_a_at	7.54496	7.7817	7.67534	7.77095	8.11322	7.8674	7.80613	7.66267	7.67668	7.63726	7.72309	7.69892	7.83984	7.60734	7.72309	7.89435	7.5722
1416512_at	8.65149	8.53667	8.6571	8.67953	8.61935	8.65188	8.78796	8.63241	8.80304	8.57515	8.49757	8.53053	8.63241	8.61037	8.51646	8.63587	8.62489
1416513_at	6.46783	6.64378	6.66414	6.89956	6.58188	6.90355	6.80626	6.83236	6.87057	6.53971	6.49501	6.52214	6.78592	6.54913	6.82288	6.7343	6.7252
1416514_a_at	11.8917	11.6584	11.7767	11.8231	11.4407	11.6645	11.884	11.7135	11.5484	11.7905	11.4143	11.5454	11.4096	11.0643	11.6161	11.5337	11.6691
1416515_at	7.28283	7.53903	7.4827	7.11262	7.32536	7.41595	7.42785	7.40901	7.17569	7.63098	7.33436	7.37936	7.51924	6.99008	7.36058	7.16522	7.1387
1416516_at	7.11083	7.41551	7.21729	6.87105	7.10829	7.23489	7.1626	7.09871	7.187	7.32436	7.12888	6.99088	7.32912	6.85096	7.23178	7.10171	7.1999
1416517_at	8.40889	8.31422	8.1947	8.16253	8.1789	8.13466	8.11672	8.20062	8.12363	8.25885	8.29309	8.40312	8.30573	8.18169	8.23416	8.22274	8.16288
1416518_at	4.84086	4.94184	4.67129	4.90227	5.19601	4.99499	4.88545	4.37639	4.83362	4.67131	4.74706	5.00859	4.82573	5.15541	4.87256	4.88545	5.02141
1416519_at	12.5154	12.5268	12.6534	12.7378	12.7642	12.7948	12.6994	12.683	12.7298	12.6247	12.4525	12.6746	12.6695	12.683	12.7241	12.785	12.619
1416520_x_at	11.2385	11.2825	11.372	11.4701	11.5251	11.4343	11.3737	11.4156	11.4264	11.3313	11.1268	11.4223	11.4036	11.4204	11.4516	11.5021	11.3868
1416521_at	11.7775	12.1079	12.2613	11.8372	12.1683	12.1231	12.2162	12.1475	12.2771	12.0228	12.0187	11.9548	12.102	12.2033	12.267	12.034	11.9524
1416522_a_at	12.0147	12.0776	12.1172	12.1601	12.3071	12.182	12.1361	12.1601	12.2274	12.1227	12.1501	12.1601	12.2604	12.4066	12.0848	12.1699	12.1518
1416523_at	5.30828	5.36272	5.39003	5.46512	5.45486	5.47832	5.48938	5.62518	5.45486	5.24856	5.45486	5.72646	5.09271	5.79219	5.42535	5.43064	5.69303
1416524_at	11.3973	11.42	11.455	11.4023	11.3814	11.4145	11.4023	11.4023	11.4357	11.3445	11.317	11.4112	11.4381	11.4753	11.3611	11.3701	11.435
1416525_at	10.7693	10.7524	10.8939	10.7541	10.8778	10.8486	10.9491	10.7812	10.9551	10.8148	10.7341	10.8787	10.7715	10.8508	10.896	10.8252	10.7916
1416526_a_at	11.5073	11.5496	11.5794	11.6358	11.6364	11.6525	11.59	11.6253	11.6979	11.5693	11.5242	11.5433	11.5917	11.5736	11.5191	11.5658	11.5658
1416527_at	5.86353	5.79205	6.08111	5.86611	5.75992	5.93036	5.91054	5.93641	5.91369	5.93559	5.61044	5.70746	5.85261	5.76407	5.98801	5.90005	5.81032
1416528_at	11.6069	11.6	11.5699	11.5225	11.4774	11.5398	11.609	11.3798	11.3737	11.617	11.4949	11.4244	11.5486	11.188	11.527	11.5325	11.5128
1416529_at	5.19874	5.02046	4.97958	5.51735	5.03091	5.32059	5.0672	5.35257	5.3379	5.33657	5.16887	5.46902	5.26158	5.68358	5.35248	5.29076	5.46747
1416530_a_at	9.15598	9.00674	9.03914	9.2948	9.2651	9.24761	9.18126	9.20734	9.29655	9.09463	9.10268	9.39261	9.18987	9.36133	9.08579	9.04121	9.35407
1416531_at	9.86202	9.87284	9.88436	9.95516	9.86004	9.95542	9.95003	9.84639	9.88677	9.88831	9.81252	9.83119	9.88245	9.74093	9.76053	9.90915	9.84219
1416532_at	9.948	9.93012	9.60323	9.73891	9.52185	9.40947	9.69418	9.63831	9.54363	9.86304	9.84024	9.62644	9.64805	9.53999	9.55906	9.54392	9.52688
1416533_at	9.93749	9.86224	9.94248	9.89149	9.94248	9.98671	9.91221	9.86684	9.94248	10.0101	10.0524	10.0501	9.9653	10.0686	9.94907	9.98983	9.91551
1416534_at	9.43272	9.33935	9.36067	9.39664	9.27245	9.35641	9.32074	9.44984	9.34785	9.51541	9.60004	9.44257	9.43405	9.19987	9.24496	9.49647	9.53299
1416535_at	9.62018	9.65877	9.67225	9.66966	9.66917	9.72715	9.73284	9.50276	9.5652	9.4552	9.28859	9.40515	9.49139	9.50468	9.53558	9.44743	9.44853
1416536_at	8.14141	8.08769	8.10685	8.07155	7.94412	8.07585	8.14117	8.2082	8.03836	7.96867	8.02278	7.92943	8.02967	8.05951	7.83485	7.88983	7.8519
1416537_at	10.0349	9.80996	9.79616	9.84875	9.66102	9.77668	9.82231	9.82296	9.73491	10.0144	10.0084	9.95772	9.78572	9.90222	9.71168	9.88882	9.9114
1416538_at	7.05326	6.98989	7.08201	7.08201	7.0633	7.02516	7.11668	7.04136	6.92597	7.21197	6.87925	7.00251	7.31012	7.13419	7.06855	7.25594	7.22941
1416539_at	6.34152	6.45263	6.47927	6.43677	6.50725	6.25718	6.51132	6.28343	6.4511	6.45263	6.45263	6.46686	6.68106	6.48267	6.45263	6.58358	6.42865
1416540_at	9.48209	9.60443	9.45671	9.4775	9.55759	9.55806	9.54442	9.35503	9.45173	9.56353	9.63845	9.65703	9.47057	9.48368	9.64005	9.51691	9.48449
1416541_at	8.49686	8.5234	8.52115	8.50162	8.50448	8.59168	8.52746	8.47946	8.52729	8.58209	8.50289	8.60652	8.69329	8.5332	8.44614	8.54318	8.4808
1416542_at	8.17633	8.15213	8.17628	8.2131	7.94496	8.23905	8.15765	7.97399	8.10673	8.13095	7.98809	8.1236	8.2433	7.92211	8.09572	7.9884	8.15719
1416543_at	7.88636	7.82292	7.85956	8.05118	7.85307	8.05218	7.95916	8.01903	8.11041	7.90902	7.88631	7.89415	7.98209	8.03295	8.17511	8.03844	8.26769
1416544_at	6.42404	6.25545	6.3425	6.33722	6.21216	6.15482	6.12198	6.15419	6.0672	6.33376	6.22304	5.97727	6.43558	6.22495	6.24867	6.07691	6.34894
1416545_at	8.9161	8.92013	8.87294	8.98374	8.86972	8.89101	8.99656	8.8173	8.79847	8.95289	8.95546	8.99818	9.04289	8.9161	8.85706	8.8962	8.85259
1416546_a_at	12.4355	12.5076	12.5426	12.5446	12.6004	12.542	12.5378	12.5501	12.6001	12.4871	12.4245	12.5633	12.5378	12.5268	12.5358	12.5507	12.5661
1416547_at	10.7274	10.7765	10.8885	10.967	10.9433	10.9468	10.8482	11.0038	10.9588	10.8701	10.6734	10.9057	10.9119	10.8885	10.7842	10.8913	10.8885
1416548_at	8.25142	8.29115	8.28202	8.21782	8.02142	8.14911	8.1811	8.31448	8.21782	8.23861	8.22894	8.28179	8.36781	8.16407	7.98744	8.1982	8.18903
1416549_at	8.9677	8.84333	8.82794	8.91231	8.81477	8.79257	8.89076	8.73638	8.78225	8.98343	8.77774	8.9017	8.97908	8.81505	8.75653	8.839	8.84411
1416550_at	8.68203	8.61931	8.68818	8.64518	8.80817	8.61702	8.77436	8.63993	8.80084	8.79082	8.75525	8.76096	8.82987	8.68599	8.55081	8.7459	8.6071
1416551_at	13.1981	13.2026	13.0473	13.0537	13.0178	13.0463	13.0841	12.9768	12.9345	13.2001	13.0233	13.1034	13.0214	12.7863	13.0106	13.0965	13.1002
1416552_at	5.67543	5.88754	5.83642	5.90136	5.89074	5.89455	5.8468	5.93499	5.81169	5.74586	5.91251	6.10314	5.77295	5.92539	5.78393	5.92312	5.76596
1416553_at	7.68454	7.73681	7.73681	7.64313	7.7595	7.73681	7.81313	7.9315	7.7917	7.70567	7.6125	7.71098	7.92975	7.8381	7.63423	7.67031	7.72507
1416554_at	7.79014	7.70982	7.91243	7.91861	7.9341	8.00653	7.91368	7.96442	7.9741	8.00158	7.91632	8.11336	8.02984	8.1475	7.97774	8.08817	8.19048
1416555_at	10.5849	10.4564	10.4287	10.5358	10.5579	10.5565	10.5912	10.4907	10.528	10.5285	10.3815	10.5503	10.5007	10.4368	10.3485	10.5007	10.449
1416556_at	10.5444	10.3043	10.3138	10.3784	10.3827	10.37	10.4274	10.3046	10.4321	10.3533	10.253	10.3784	10.3897	10.4979	10.3474	10.3784	10.3986
1416557_a_at	9.9597	9.7954	9.79885	9.83144	9.72385	9.68085	9.76077	9.76625	9.77505	9.82366	9.72869	9.7261	9.71161	9.56672	9.70879	9.63388	9.73319
1416558_at	3.64113	3.69858	3.83932	3.70048	3.87714	3.85414	3.72715	3.81785	3.88195	3.92405	3.81785	3.67436	3.81785	4.21039	3.83932	3.93019	3.93383
1416559_at	7.03018	6.89022	7.22185	7.15557	7.2503	7.1387	7.1576	6.83236	7.04222	7.17592	7.18851	6.93332	7.25009	7.27205	6.99148	7.1871	7.22703
1416560_at	6.80053	6.9922	6.39659	7.12918	7.05583	7.69018	6.96724	7.46477	7.57933	6.73344	6.86662	7.01306	6.74802	7.24154	7.12432	7.16417	7.065
1416561_at	11.9899	11.9457	12.008	12.0883	11.8441	11.9806	12.061	11.9344	11.824	11.9715	11.7596	11.8487	11.892	11.5192	12.0016	11.905	11.9693
1416562_at	11.3102	11.2823	11.0885	11.1624	11.0779	11.2494	11.1698	11.0714	11.0484	11.2695	11.0415	11.1042	11.064	10.7684	11.047	11.0829	10.9934
1416563_at	9.44336	9.49908	9.49648	9.48191	9.26104	9.32493	9.36696	9.40301	9.38278	9.27061	9.31311	9.16006	9.20135	9.1897	9.19396	9.1252	9.33056
1416564_at	5.46234	5.71031	5.4988	5.5455	5.3647	5.6185	5.54434	5.80462	5.52925	5.54434	5.43393	5.31587	5.63252	5.54434	5.52784	5.67548	5.51032
1416565_at	12.6387	12.6444	12.6252	12.6848	12.8288	12.7224	12.7055	12.6865	12.7026	12.5494	12.619	12.648	12.7623	12.6848	12.6613	12.7085	12.7218
1416566_at	10.3628	10.4318	10.4293	10.541	10.4981	10.549	10.4446	10.1868	10.3153	10.5562	10.1937	10.571	10.4416	10.2825	10.4956	10.4632	10.4683
1416567_s_at	10.7311	10.7387	10.8391	10.9941	10.7774	10.7774	10.8011	10.692	10.8352	10.7412	10.4597	10.6988	10.6875	10.8343	10.8501	10.6464	10.8116
1416568_a_at	8.54372	8.88006	8.64159	8.77762	8.6196	8.53249	8.52982	8.45635	8.60194	8.92796	8.76492	8.77968	8.77639	8.71749	9.0733	8.68594	8.70152
1416569_at	6.64156	6.67273	6.6368	6.89434	6.55872	6.64156	6.73772	6.47983	6.45304	6.7699	6.63127	6.44024	6.75799	6.61502	6.64556	6.25545	6.69007
1416570_s_at	9.2518	9.18725	9.12295	9.24192	9.24092	9.12074	9.29147	9.27707	9.15087	9.34553	9.14658	9.09799	9.09245	9.18725	9.05282	9.03233	9.24286
1416571_at	4.3634	4.39009	4.55639	4.57363	4.7935	4.79418	4.47784	4.58503	4.61189	4.54972	4.71387	4.65487	4.60384	4.50865	4.66426	4.68082	4.69419
1416572_at	5.98371	6.02825	5.63841	5.89205	5.49487	5.83279	5.76596	5.65817	5.68066	5.78534	5.63763	5.91607	5.69082	5.88491	5.73927	5.85232	5.76596
1416573_at	6.86764	6.87811	6.83384	6.78971	6.72142	6.81405	6.82457	6.81298	6.83384	6.79249	6.7147	6.8893	7.07825	6.85689	6.83384	6.87581	6.82577
1416574_at	8.81956	8.565	8.81717	8.8	8.55286	8.68002	8.8834	8.8049	8.69573	8.74126	8.45199	8.53726	8.49042	8.32424	8.71413	8.64103	8.71894
1416575_at	5.25787	5.52875	5.6507	5.57485	5.63493	5.75316	5.51877	5.74364	5.60407	5.71982	5.60007	5.75826	5.72507	5.38273	5.9238	5.49596	5.58094
1416576_at	6.05581	5.89613	6.13034	5.90092	6.07169	5.74473	5.95679	6.27395	6.17383	5.86271	6.2159	6.00598	5.71035	6.21003	5.96253	5.96253	5.92196
1416577_a_at	11.2429	11.0449	11.2095	11.1568	11.254	11.1304	11.2641	11.3457	11.3084	11.0629	11.4036	11.1865	11.3163	11.4451	10.9934	11.0808	11.2545
1416578_at	10.537	10.3594	10.5287	10.5927	10.5076	10.4785	10.522	10.6543	10.5895	10.4652	10.4938	10.3203	10.6876	10.6076	10.4127	10.4761	10.6211
1416579_a_at	4.57187	4.85662	5.10507	5.0595	4.62188	5.05376	5.06091	4.87891	5.03055	5.17728	4.67665	5.1824	4.46728	4.96598	4.86469	5.04125	4.77051
1416580_a_at	11.4336	11.6161	11.4675	11.5319	11.5344	11.5562	11.4955	11.3302	11.4696	11.5104	11.3443	11.5423	11.5648	11.3942	11.5225	11.3977	11.4267
1416581_at	8.25352	8.35117	8.25209	8.30841	8.36652	8.3276	8.20695	8.26762	8.21046	8.43092	8.39232	8.35207	8.42076	8.2337	8.2882	8.36698	8.19056
1416582_a_at	8.5239	8.68738	8.74733	8.70007	8.82823	8.77153	8.68942	8.73066	8.84774	8.6897	8.88645	8.77405	8.90895	8.84134	8.79657	8.96066	8.8104
1416583_at	8.05798	8.05339	8.15938	8.22437	8.34079	8.23426	8.1574	8.17508	8.23794	8.30468	8.13773	8.19484	8.33552	8.26989	8.29865	8.19802	8.14571
1416584_at	5.97354	6.23428	6.01835	5.94736	6.02183	5.96109	6.1322	6.06951	6.12011	5.94021	5.97768	6.10035	6.06217	5.94948	6.00021	5.94646	5.94396
1416585_at	8.92645	8.83703	9.04267	9.23142	9.01922	9.02596	9.03124	8.91719	8.96341	9.10306	8.9279	8.91408	9.03253	8.88454	8.98388	9.00933	8.91462
1416586_at	9.05518	9.01274	9.1317	9.19987	8.97342	8.98338	9.07557	9.07404	8.99663	8.98338	8.87505	8.73142	8.94858	8.85446	8.89001	8.88139	8.94985
1416587_a_at	7.7629	7.83921	7.76752	7.80724	7.7749	7.68599	7.71804	7.66846	7.75106	7.854	7.80261	7.80292	7.75834	7.65848	7.73489	7.77059	7.79493
1416588_at	11.1848	11.2693	11.0715	11.097	10.9858	11.0115	11.122	10.9231	10.9753	11.1166	11.1759	11.0468	11.0436	10.8364	10.9832	10.9441	10.9372
1416589_at	11.3785	11.4434	11.3773	11.4928	11.5466	11.6123	11.3401	11.2984	11.4645	11.4593	11.3174	11.5713	11.3787	11.3621	11.4594	11.5913	11.3428
1416590_a_at	8.09782	8.01187	7.96219	8.06445	8.10167	7.89223	7.93968	8.17377	8.17707	7.85948	7.8954	7.63074	7.88082	7.83269	7.66134	7.88644	7.67472
1416591_at	8.46114	8.68039	8.61084	8.61138	8.50493	8.5998	8.55099	8.6633	8.60747	8.36508	8.31022	8.12996	8.49757	8.44814	8.1627	8.38908	8.22634
1416592_at	9.04243	9.10694	9.11822	9.10033	9.11052	9.20418	9.1817	9.10773	9.14391	8.96622	8.81276	8.93819	9.18423	9.09076	9.03832	8.98488	8.98024
1416593_at	8.82267	8.8521	9.06898	8.90056	9.12531	9.0478	9.12034	8.97744	9.07096	8.87232	8.70518	8.86852	8.91063	8.74993	8.73867	8.76384	8.69088
1416594_at	5.63195	5.51996	5.79606	5.59544	5.96812	5.87164	5.8052	5.47406	5.78685	5.56162	5.90017	5.64108	5.66862	6.01672	5.85403	5.87525	5.80796
1416595_at	9.54609	9.60913	9.70004	9.71933	9.73005	9.72487	9.62549	9.60563	9.67443	9.75004	9.52636	9.73921	9.81831	9.77847	9.78961	9.71811	9.7421
1416596_at	5.26023	5.13812	5.39303	5.17672	5.42373	5.4712	5.36283	5.40815	5.61444	5.42689	5.51585	5.79729	5.53975	5.71616	5.45046	5.47172	5.3763
1416597_at	7.84199	7.89381	7.72787	7.84894	7.75742	7.81241	7.79567	7.77992	7.64864	7.99284	7.74039	7.57569	7.97232	7.52385	7.72093	7.71476	7.54984
1416598_at	7.35159	7.27299	7.13791	7.15037	7.23384	7.27843	7.15876	7.40345	7.10519	7.06004	7.00898	7.21436	6.95302	7.02939	7.02862	7.15037	7.15037
1416599_at	6.85227	6.77114	6.77054	6.7548	6.94358	6.97347	6.92114	6.99869	6.99361	6.88072	7.02876	6.98279	6.8146	6.94409	6.85409	6.98114	6.95188
1416600_a_at	9.50746	9.51566	9.62054	9.62167	9.48213	9.57425	9.62084	9.68445	9.65358	9.56358	9.6139	9.5811	9.57519	9.7102	9.42511	9.47336	9.6937
1416601_a_at	7.80863	7.80063	8.07097	7.96865	8.06066	8.02694	8.09271	7.89967	7.9067	8.08778	7.84464	8.00544	8.01748	7.81884	8.05729	7.97973	7.91776
1416602_a_at	7.2208	6.93377	6.8893	7.13482	6.95787	6.98218	6.87129	6.78627	6.65755	7.02638	6.78004	6.63547	6.99977	6.60875	6.9513	6.75511	6.80027
1416603_at	10.0794	10.2858	10.4247	10.4616	10.5271	10.4408	10.4247	10.3866	10.4247	10.2863	10.22	10.5438	10.4247	10.4935	10.5088	10.4634	10.436
1416604_at	11.9934	11.953	11.907	12.0029	12.0171	12.0269	11.9923	12.1213	12.0803	11.976	11.937	11.9097	11.9338	11.8842	11.8585	11.9989	11.9324
1416605_at	8.99326	8.96577	9.12234	9.32077	9.22589	9.28662	9.26114	9.20274	9.22163	8.96838	8.73816	8.91017	9.05631	8.92703	9.02029	8.92911	8.97476
1416606_s_at	10.0116	10.0698	10.1349	10.1387	10.1429	10.2116	10.0982	10.2545	10.2689	9.96706	9.92439	10.1036	10.1587	10.0842	9.89271	10.0474	9.9906
1416607_at	9.09649	8.99897	9.09489	9.18696	9.24076	9.09644	9.04621	9.20824	9.0778	9.04621	8.87253	9.04177	9.14645	8.93334	8.81929	8.96125	8.76606
1416608_a_at	9.95931	9.79142	9.98165	10.1678	9.81889	10.1169	9.95392	10.1155	10.0514	9.85699	9.56227	9.83217	9.94949	9.76763	9.96122	9.9549	9.84776
1416609_at	10.3494	10.2403	10.3072	10.4125	10.4346	10.4266	10.361	10.4148	10.4579	10.2068	10.2071	10.279	10.3151	10.3262	10.2326	10.2508	10.2462
1416610_a_at	10.5452	10.5992	10.4414	10.5509	10.5993	10.4493	10.3826	10.4145	10.4385	10.3534	10.1907	10.3438	10.3583	10.4077	10.4468	10.5562	10.4041
1416611_at	8.43617	8.46826	8.33906	8.49245	8.36414	8.50201	8.38376	8.46112	8.46826	8.47415	8.57661	8.57478	8.47656	8.54734	8.25992	8.49707	8.36885
1416612_at	6.86251	6.57288	6.67497	6.99456	6.95644	7.17306	6.7888	6.96258	7.31599	6.84044	6.99385	6.89605	6.83533	7.179	6.87218	7.17301	6.8857
1416613_at	4.11988	4.00688	4.15613	4.10428	4.3783	4.31191	4.05136	4.12012	4.37997	3.81011	4.07422	4.26328	4.01841	4.20506	4.10428	4.33713	4.01155
1416614_at	11.591	11.7266	11.812	11.8138	11.7336	11.7826	11.7149	11.586	11.5529	11.7372	11.3667	11.7335	11.7287	11.4642	11.9309	11.775	11.792
1416615_at	10.3865	10.3229	10.3771	10.3565	10.5435	10.5219	10.5696	10.4867	10.519	10.2856	10.3972	10.4117	10.4701	10.541	10.346	10.3954	10.4019
1416616_s_at	9.55191	9.6257	9.62922	9.79025	9.56905	9.66387	9.65606	9.64878	9.65615	9.68808	9.45861	9.56093	9.76556	9.55248	9.54831	9.59402	9.59402
1416617_at	8.63411	8.68879	8.6845	8.73507	8.70885	8.72695	8.73528	8.682	8.46134	8.65043	8.55961	8.74704	8.77948	8.75514	8.57939	8.69275	8.67666
1416618_at	7.96915	7.94671	7.78033	8.11204	8.00201	7.77361	7.81312	7.92281	7.87698	7.88528	7.85295	7.78671	7.74917	7.80211	7.84123	7.87358	7.71018
1416619_at	7.42082	7.47844	7.70352	7.53014	7.51483	7.62315	7.59803	7.54495	7.57131	7.64276	7.46123	7.66001	7.58459	7.50521	7.35518	7.31415	7.47536
1416620_at	8.38461	8.38317	8.36253	8.38143	8.28177	8.27839	8.48634	8.42861	8.38395	8.43122	8.19842	8.21629	8.31606	8.00729	8.43643	8.34159	8.26328
1416621_at	9.81634	9.6991	9.63606	9.64803	9.57089	9.61654	9.6932	9.82824	9.70626	9.67012	9.81471	9.65598	9.53287	9.65434	9.40857	9.55722	9.57404
1416622_at	6.49774	6.61756	6.5828	6.67447	6.67733	6.82532	6.58441	6.63474	6.61756	6.72269	6.49501	6.2891	6.71205	6.43211	6.61756	6.61756	6.3383
1416623_at	7.36896	7.28235	7.16703	7.19531	7.26958	7.33106	7.11444	7.31766	7.16731	7.24431	7.02581	6.96781	7.23067	7.08892	7.01268	7.15523	6.92039
1416624_a_at	14.0214	14.0415	14.0416	14.0921	14.1066	14.1057	14.0189	14.0751	14.0609	13.9976	13.9607	14.0819	14.0967	14.1038	14.0732	14.096	14.1279
1416625_at	7.50944	7.36349	7.07326	7.87652	7.53641	8.24325	7.36955	8.14305	8.45753	7.36629	7.59872	7.74065	7.27505	7.81474	7.36698	7.84682	7.45648
1416626_at	5.05015	5.4942	5.41435	5.2071	5.60765	5.34213	5.45819	5.33123	5.55546	5.28648	5.61379	5.72364	5.18669	5.60902	5.34586	5.49053	5.38689
1416627_at	5.99101	6.10324	6.15389	6.08831	5.89868	6.08712	5.91722	6.08712	6.08712	6.03937	6.28179	6.12637	6.09603	6.17095	6.22427	6.02542	6.0366
1416628_at	9.90557	9.92302	10.0654	10.0991	10.1268	10.1349	10.0527	10.0662	10.2594	9.89714	10.0527	10.0295	10.0602	10.2369	10.0129	10.0527	10.1411
1416629_at	5.00401	4.92122	4.91893	5.0782	4.88793	5.0686	4.92749	5.22603	5.08423	5.03791	4.90991	5.13501	4.95581	5.07488	5.00843	4.96704	5.0376
1416630_at	9.04749	9.09796	8.98869	9.34181	9.22012	9.21435	9.03342	9.23876	9.37593	8.77306	8.89052	9.04925	9.01607	9.04749	8.90572	8.81428	8.88524
1416631_at	7.43488	7.37472	7.24714	7.4351	7.24318	7.37472	7.28582	7.38286	7.20739	7.4172	7.15616	7.40486	7.41178	7.19983	7.29625	7.31334	7.41001
1416632_at	9.61851	9.5267	9.53845	9.70557	9.5695	9.56128	9.56955	9.45112	9.45173	9.60059	9.38399	9.64872	9.5267	9.45385	9.627	9.43113	9.51033
1416633_a_at	9.20441	8.99023	9.32769	9.47293	9.1886	9.30811	9.31788	9.42336	9.22944	9.23183	8.92317	9.24819	9.33313	9.12935	9.521	9.26194	9.44725
1416634_at	8.65074	8.76723	8.99975	8.99806	8.9298	8.95886	8.98469	8.90287	9.13648	8.97014	8.66957	9.12759	9.21798	8.98148	9.14307	8.79512	9.02071
1416635_at	9.52195	9.3733	9.38222	9.62639	9.57223	9.58889	9.60896	9.36263	9.53038	9.39926	9.25897	9.4334	9.30664	9.47386	9.50689	9.4338	9.39856
1416636_at	12.3872	12.3698	12.4715	12.5612	12.4571	12.5376	12.5172	12.4824	12.4748	12.4824	12.2906	12.4844	12.4784	12.3878	12.5603	12.438	12.5816
1416637_at	7.7417	7.7749	7.68333	7.91456	7.73761	7.74554	7.60208	7.52188	7.77857	7.84094	7.71517	7.95759	7.86194	8.05337	7.71325	7.85057	7.67356
1416638_at	8.31811	8.64908	8.39807	8.5348	8.33668	8.41129	8.41116	8.1536	8.19252	8.26244	8.29992	8.17681	8.45277	8.07375	8.33668	8.18315	8.39011
1416639_at	6.63173	6.76539	6.9315	6.76427	6.97198	6.79579	6.87708	7.04999	7.02968	6.91079	7.21834	6.80275	6.81741	7.14513	7.05851	6.8324	6.90118
1416640_at	6.0272	6.10696	6.02446	6.11772	6.17734	6.30283	6.35582	6.18357	6.14484	6.18175	6.18175	6.23882	6.18175	6.10799	6.18175	6.23086	6.20188
1416641_at	7.20485	7.39136	7.10318	7.26968	7.13733	7.14975	7.13654	7.23208	7.14333	7.06503	7.31113	7.15409	7.14333	7.0887	6.99685	7.01404	7.10423
1416642_a_at	13.7868	13.8177	13.8598	13.8701	13.868	13.9087	13.8413	13.8038	13.7976	13.8606	13.7725	13.8642	13.905	13.8816	13.8807	13.886	13.8801
1416643_at	4.29017	4.33168	4.24592	4.08399	4.38483	4.29017	4.18309	4.17689	4.37537	4.18981	4.31798	4.53912	4.33277	4.34458	4.27521	4.46776	4.17636
1416644_a_at	5.55477	5.42736	5.51004	5.46886	5.85184	5.59119	5.55392	5.55477	5.67723	5.49231	5.66404	5.63511	5.27541	5.69476	5.45486	5.87799	5.59722
1416645_a_at	3.38262	3.35445	3.30377	3.32029	3.46877	3.38089	3.3038	3.52792	3.30377	3.35445	3.35445	3.27082	3.43476	3.38895	3.28693	3.3895	3.3282
1416646_at	4.58356	4.30677	4.2677	4.28414	4.40081	4.29767	4.29314	4.54303	4.24546	4.40081	4.62132	4.59137	4.31633	4.46109	4.54278	4.40081	4.4646
1416647_at	8.78916	8.63028	8.72031	8.72031	8.65755	8.8196	8.73533	8.6635	8.79296	8.7182	8.75495	8.76056	8.72031	8.72354	8.57092	8.70295	8.63306
1416648_at	12.236	12.1989	11.8727	11.9269	11.8115	11.8125	11.9146	11.8515	11.68	12.1111	12.072	11.8303	11.8083	11.5425	11.7641	11.8522	11.808
1416649_at	4.29947	4.37192	4.36077	4.35161	4.51357	4.5162	4.60241	4.46205	4.52736	4.42083	4.23921	4.55526	4.51498	4.22047	4.4409	4.53291	4.45886
1416650_at	3.53414	3.51925	3.46936	3.39869	3.58484	3.76631	3.52217	3.44784	3.53351	3.59021	3.56178	3.75306	3.43081	3.48022	3.74808	3.52395	3.49101
1416651_at	9.01191	9.02953	9.09667	9.16006	9.04047	9.19051	9.09367	8.95437	9.06644	8.8828	8.80264	8.98171	9.04411	8.8953	9.0061	9.01899	8.9376
1416652_at	4.06461	3.84518	4.16484	4.29083	3.94237	4.42167	4.56949	4.51723	4.30133	4.21362	4.15322	4.2082	4.29623	4.23588	4.44826	4.348	4.41268
1416653_at	8.69459	8.54567	8.70663	8.76146	8.48409	8.73257	8.56388	8.81947	8.62084	8.53548	8.40617	8.44978	8.62029	8.44008	8.48412	8.5745	8.48989
1416654_at	7.41402	7.42716	7.51698	7.62545	7.54122	7.52487	7.57587	7.34227	7.50298	7.51908	7.51756	7.46708	7.71553	7.59642	7.53429	7.49009	7.56932
1416655_at	9.92353	9.73742	9.8407	9.97846	9.88952	9.91735	9.99874	9.77263	9.9264	9.88527	9.58731	9.91451	9.93443	9.95099	9.90479	9.74516	10.012
1416656_at	7.40198	7.35725	7.28829	7.59129	7.57721	7.60162	7.45957	7.5664	7.72706	7.40395	7.5217	7.38938	7.6239	7.69196	7.56864	7.46473	7.47223
1416657_at	10.2922	10.5469	10.2922	10.3552	10.2774	10.3802	10.2864	10.2268	10.1921	10.3192	10.2205	10.3212	10.3752	10.2541	10.3706	10.2342	10.199
1416658_at	9.23676	9.08219	9.13452	9.045	8.92081	9.08219	9.18134	8.94762	9.10324	9.10515	9.05569	9.06567	9.08395	8.98816	9.04224	9.20922	9.08016
1416659_at	10.3334	10.3459	10.3176	10.3623	10.3119	10.3344	10.3686	10.2725	10.2706	10.3197	10.2026	10.2585	10.2814	10.1701	10.3194	10.1992	10.3147
1416660_at	8.98626	8.97427	9.15248	9.12273	9.08501	9.08501	9.04527	9.03087	9.22999	9.07752	9.15309	9.12094	9.11335	9.16998	9.12116	8.84616	9.08718
1416661_at	6.78429	6.80892	7.21754	7.13912	6.90896	6.98875	7.02053	6.93778	7.04671	7.22102	6.84561	6.86965	6.86959	6.90568	7.06538	6.74109	6.81063
1416662_at	6.78904	6.86475	6.99533	6.73576	6.9154	7.04874	6.96673	7.02797	6.97342	6.85306	7.00377	7.11293	6.93253	6.91963	6.85379	7.01882	6.95044
1416663_at	11.1698	11.2194	11.2896	11.3236	11.3381	11.4047	11.3661	11.29	11.4131	11.2326	11.1625	11.175	11.3291	11.2832	11.2141	11.3735	11.3014
1416664_at	5.01285	5.29579	5.32018	5.35287	4.99808	5.32866	5.09964	5.49729	5.3517	5.27185	5.46899	5.51781	5.07238	5.43706	5.30418	5.33629	5.30418
1416665_at	9.99021	9.8192	10.1108	10.0743	10.2135	10.1842	10.0828	10.1449	10.1561	10.0366	9.91197	10.076	10.149	10.0477	9.98298	9.95185	10.023
1416666_at	12.0506	12.0331	12.0927	12.0959	11.9431	12.1696	12.1586	12.0618	12.1516	12.0923	11.939	12.0321	12.0819	12.0103	12.0035	12.1431	12.1279
1416667_at	8.67589	8.60776	8.55446	8.62684	8.65389	8.66407	8.67022	8.55773	8.67101	8.74651	8.75161	8.81104	8.76929	8.84209	8.69088	8.72095	8.83899
1416668_at	11.0498	10.9829	11.0011	11.0445	11.1158	11.1042	11.066	11.0594	11.1283	11.0807	10.817	10.9499	11.0251	11.0605	11.0365	11.0365	11.0167
1416669_s_at	11.9415	11.8876	12.0332	12.0766	12.0442	12.0443	11.9568	12.0779	11.9658	11.9372	11.7567	12.0386	11.99	11.9166	12.069	12.0176	12.0904
1416670_at	6.15679	6.43299	6.57992	6.24033	6.82417	6.63367	6.34995	6.64233	6.53606	6.69712	6.49501	6.77823	6.71205	6.10068	6.57992	6.91523	6.49055
1416671_a_at	8.93517	8.82661	8.82511	8.85443	8.84	8.90835	8.84	8.81565	8.8662	8.89498	8.84657	8.84	8.74086	8.92385	8.71793	8.73708	8.82661
1416672_s_at	9.14616	9.1558	9.01218	9.24825	8.92085	9.05092	9.0486	9.09629	9.08911	9.21574	9.08848	9.18547	9.0271	9.06638	8.99742	8.96292	9.0071
1416673_at	5.01035	5.26739	5.0357	5.11036	5.1505	5.15773	4.97483	4.99852	5.0953	5.01035	4.8449	4.91178	4.66975	4.85722	4.93324	4.96059	4.87046
1416674_at	8.02391	8.05209	7.98916	8.21387	7.91627	8.02077	8.09018	7.81781	7.81358	8.04705	8.06775	8.02004	8.1117	7.788	8.13595	8.09761	8.04714
1416675_s_at	7.80154	7.71385	7.45458	7.76916	7.60397	7.82777	7.61404	7.61267	7.70452	7.38736	7.66671	7.36055	7.49059	7.5557	7.22331	7.56623	7.36312
1416676_at	3.75183	4.11409	3.98648	4.08583	3.9126	4.03599	4.03599	4.01764	3.9872	4.02507	4.20582	4.09133	4.13003	3.97919	4.10733	4.1399	3.99506
1416677_at	6.03915	5.95356	6.13259	6.17168	6.25226	6.15031	6.2603	6.06589	6.08254	6.1514	6.10915	6.10915	6.06203	6.05754	6.08449	6.22034	6.06679
1416678_at	11.0561	10.9319	10.99	11.1562	11.0373	11.0018	10.9952	10.9076	10.9793	10.9288	10.8128	10.99	10.9526	10.9792	11.0132	10.9755	10.9601
1416679_at	10.6817	10.7112	10.6505	10.7851	10.6495	10.6544	10.6685	10.6547	10.6793	10.6653	10.505	10.6275	10.541	10.598	10.5959	10.6025	10.6421
1416680_at	10.6184	10.5649	10.5696	10.6708	10.5341	10.5037	10.5582	10.631	10.5329	10.5039	10.2758	10.4942	10.4741	10.4505	10.7631	10.6436	10.5461
1416681_at	6.01318	6.38961	6.6545	6.2182	6.22504	6.30686	6.66645	6.28464	6.40543	6.25545	6.25219	6.23212	6.74439	6.47926	6.79314	6.24756	6.73278
1416682_at	5.64884	5.657	5.77206	5.86777	5.82971	5.69118	5.72077	5.70237	5.53881	5.81261	5.59808	5.65528	5.73875	5.44532	5.96961	5.62776	6.09291
1416683_at	8.73702	8.57701	8.42238	8.62115	8.46559	8.5098	8.53678	8.56332	8.55929	8.48544	8.55217	8.49143	8.42877	8.57045	8.34258	8.44998	8.43506
1416684_at	9.06417	9.23706	9.30015	9.27463	9.21826	9.36443	9.35235	9.40267	9.4315	9.28341	9.27303	9.29398	9.26368	9.25312	9.19218	8.99302	9.2073
1416685_s_at	9.60733	9.68333	9.6431	9.72998	9.63386	9.70709	9.76481	9.69273	9.76601	9.64074	9.66223	9.70982	9.6195	9.68395	9.54255	9.51735	9.59018
1416686_at	6.39932	6.63945	6.72686	6.73892	6.60852	6.45246	6.73471	6.32896	6.57459	6.62532	6.60455	6.23625	6.56835	6.52493	6.99566	6.7631	6.30123
1416687_at	6.45869	6.30632	6.03922	5.99137	6.09025	5.89021	6.21736	6.1881	5.96224	5.915	5.92002	5.83643	5.96559	6.14654	5.91085	5.92264	5.7476
1416688_at	12.3908	12.2391	12.1521	12.1889	11.9814	12.1354	12.1228	12.2489	12.0351	12.2672	11.9877	12.1085	12.1228	11.7777	12.0335	12.09	12.1453
1416689_at	6.219	6.33547	6.5769	6.51694	6.55708	6.34564	6.47893	6.56133	6.59276	6.38161	6.47538	6.47893	6.44713	6.60062	6.25024	6.69331	6.74996
1416690_at	8.82272	8.86156	8.75163	8.81585	8.78566	8.68501	8.78276	8.83422	8.73101	8.84739	8.86299	8.73577	8.77749	8.81544	8.69623	8.78276	8.7676
1416691_at	8.42992	8.40616	8.32519	8.41595	8.26821	8.46022	8.46128	8.29546	8.31024	8.60045	8.28995	8.56702	8.47145	8.40498	8.27615	8.44728	8.26195
1416692_at	8.82931	8.75475	8.75413	8.85904	8.71531	8.79422	8.80855	8.75645	8.80031	8.77434	8.48422	8.72383	8.80164	8.75475	8.59362	8.68094	8.71844
1416693_at	4.37609	4.71663	4.26067	4.74115	4.49493	5.40883	4.40535	5.48928	5.72621	4.47169	4.76646	4.65783	4.43572	4.97857	4.71366	5.08835	4.64484
1416694_at	3.48033	3.74362	3.5309	3.61077	3.67545	3.59191	3.4695	3.66572	3.45419	3.70605	3.59191	3.69794	3.75059	3.73079	3.54567	3.51824	3.46022
1416695_at	6.69242	6.88141	6.96618	7.05227	6.88328	7.36072	7.10969	7.10969	7.34107	6.88446	7.013	7.41451	7.08294	7.22855	7.02897	7.31586	7.03966
1416696_at	8.50015	8.54765	8.55558	8.61904	8.74729	8.66072	8.59746	8.54309	8.6127	8.65436	8.61116	8.67324	8.79145	8.78392	8.73915	8.63701	8.62622
1416697_at	4.28279	4.30637	4.1542	4.21902	4.35848	4.39144	4.25419	4.76706	4.70149	4.30739	4.38051	4.35161	4.39539	4.35161	4.35161	4.29164	4.32767
1416698_a_at	7.4205	7.38745	7.54622	7.53157	7.40904	7.42739	7.67942	7.4289	7.46609	7.18969	7.17773	7.19429	7.6217	7.0696	7.55452	7.13664	7.24461
1416699_at	11.1501	11.0856	11.1832	11.1849	11.1745	11.206	11.2332	11.1404	11.2308	11.186	11.161	11.2144	11.2576	11.1379	11.1619	11.1896	11.1621
1416700_at	7.18557	7.55307	7.1392	7.38756	7.39525	7.73077	7.48549	7.25336	7.52799	7.20789	7.03712	7.36576	7.54046	7.50981	7.33149	7.03643	7.46857
1416701_at	6.68268	6.70258	6.9	6.69217	6.79997	6.90591	6.84377	6.75951	7.00767	6.42443	6.44346	6.85338	6.79769	7.02572	6.79332	6.77849	6.85501
1416702_at	11.0735	10.9909	11.0572	11.1158	11.1326	11.2397	11.0076	11.0821	11.11	10.9735	10.7637	11.1297	11.0945	11.0864	10.977	11.0248	11.1442
1416703_at	10.3684	10.3544	10.3388	10.3929	10.2553	10.2438	10.4007	10.3357	10.3191	10.3197	10.2411	10.1398	10.2814	10.0783	10.2306	10.2481	10.2288
1416704_at	8.55894	8.62888	8.63308	8.58162	8.62093	8.6798	8.71586	8.58085	8.51954	8.65795	8.61195	8.60705	8.70644	8.33479	8.46378	8.64964	8.54434
1416705_at	8.51968	8.40248	8.3909	8.47585	8.34448	8.44665	8.58475	8.19916	8.28166	8.5871	8.09245	8.22314	8.53305	8.55334	8.72517	8.45039	8.5082
1416706_at	8.54995	8.69965	8.76703	8.70077	8.68928	8.79053	8.80133	8.47889	8.74185	8.99514	8.50483	9.0651	8.9515	8.84165	8.92634	8.83162	8.94394
1416707_a_at	6.14009	6.35393	6.62704	6.33412	6.55152	6.51575	6.45635	6.51105	6.63109	6.39881	6.59324	6.54135	6.57108	6.59909	6.56871	6.48084	6.24492
1416708_a_at	9.50202	9.47016	9.36383	9.47674	9.28158	9.39788	9.36383	9.44675	9.39912	9.45692	9.39336	9.2008	9.16441	9.15705	9.23525	9.23795	9.19853
1416709_a_at	9.4562	9.4443	9.53045	9.71588	9.61343	9.65572	9.51428	9.56281	9.56281	9.55738	9.40171	9.66132	9.61768	9.60278	9.51706	9.58794	9.63879
1416710_at	9.67319	9.70317	9.60267	9.84639	9.63917	9.84822	9.60888	9.40887	9.49542	9.59405	9.21804	9.65863	9.61937	9.44604	9.5766	9.52336	9.58232
1416711_at	7.39705	7.26992	7.48489	7.5516	6.96953	7.41672	7.36469	7.24843	7.06925	7.22702	7.14025	7.33947	7.04603	6.87875	7.19999	7.02707	7.57482
1416712_at	9.15158	9.14723	9.18769	9.10049	9.11731	9.18833	9.24381	9.0523	9.1921	9.19465	9.15158	9.2221	9.28347	9.13222	9.02779	9.15158	9.15169
1416713_at	8.67841	8.56461	8.74102	8.6029	8.92938	8.68578	8.47577	8.62861	8.62168	8.96624	8.74926	8.69631	8.67859	8.59944	8.68178	9.03503	8.51337
1416714_at	6.3802	6.06154	6.14531	6.33093	6.1706	6.09595	6.32324	6.52846	6.30359	6.19484	5.9751	6.20826	6.16658	6.16658	6.03521	6.00831	6.14885
1416715_at	4.93734	5.02999	4.96642	4.69221	5.09025	4.7073	4.75936	4.5836	4.67624	4.95548	5.04015	4.86815	4.88545	4.9071	4.90665	5.05493	4.87856
1416716_at	7.3388	7.48395	7.38748	7.52036	7.27604	7.40415	7.44171	7.39137	7.27671	7.35808	7.39195	7.41451	7.41189	7.57087	7.37774	7.43722	7.33505
1416717_at	3.49909	3.45024	3.49721	3.50173	3.6381	3.4442	3.4706	3.4842	3.7045	3.59195	3.3511	3.50285	3.49909	3.49909	3.49909	3.58836	3.4735
1416718_at	10.033	10.1068	9.98453	9.98919	9.93183	9.98453	9.98865	10.065	9.87831	10.0859	9.8896	9.98453	10.0607	9.89934	9.89749	9.97059	9.80627
1416719_a_at	12.5968	12.7062	12.7005	12.7047	12.89	12.7988	12.7092	12.6382	12.7281	12.6463	12.5254	12.7976	12.7395	12.7072	12.7983	12.7543	12.7079
1416720_at	9.11877	8.99007	9.15449	9.09087	9.11474	9.09434	9.06722	9.13787	9.17537	8.95189	9.06574	8.90328	8.91536	9.06233	8.95525	9.06574	9.00622
1416721_s_at	10.5376	10.3352	10.1872	10.3588	10.1979	10.1793	10.1557	10.3969	10.2339	10.1757	10.2269	9.81985	10.2059	10.0411	10.0031	10.0314	9.92562
1416722_at	10.6529	10.5949	10.4724	10.5671	10.5226	10.407	10.5528	10.4947	10.3909	10.8546	10.6436	10.7345	10.7259	10.5905	10.541	10.6747	10.5761
1416723_at	12.2569	12.2634	12.2067	12.2016	12.1556	12.0113	12.2293	12.1338	12.1529	12.1508	12.1809	12.082	12.1125	11.9994	12.1516	12.0839	12.163
1416724_x_at	11.5356	11.5335	11.4233	11.4319	11.5446	11.3374	11.5585	11.3083	11.2835	11.4597	11.3052	11.353	11.4222	11.2847	11.7512	11.4569	11.3892
1416725_at	5.58606	5.87238	5.67119	5.75842	5.83174	5.86855	5.93167	5.63171	5.92865	5.78534	5.69129	5.79794	5.80389	5.88804	5.86192	6.02294	5.84642
1416726_s_at	10.9624	11.0424	10.8183	10.9514	11.2666	11.0422	11.0863	10.9525	11.042	10.8723	10.9146	11.1708	11.2489	11.0538	11.0675	11.1323	10.8847
1416727_a_at	10.4564	10.4704	10.5509	10.5958	10.5782	10.6674	10.6034	10.6031	10.6034	10.5841	10.449	10.7067	10.6717	10.6284	10.6511	10.7027	10.751
1416728_at	11.3455	11.3864	11.2836	11.3662	11.2942	11.3511	11.3342	11.3038	11.2546	11.4072	11.2537	11.3223	11.2435	11.0368	11.2178	11.3457	11.2827
1416729_at	4.193	4.20412	4.29059	4.22495	4.45886	4.25012	4.47586	4.33344	4.4068	4.23285	4.32566	4.18449	4.16941	4.38696	4.18497	4.33713	4.32868
1416730_at	8.38155	8.41579	8.42484	8.34178	8.23047	8.38953	8.44593	8.20128	8.36036	8.26704	8.11341	8.43899	8.02678	8.38393	8.34605	8.22408	8.2595
1416731_at	10.1549	10.0099	9.98071	10.1247	9.94447	10.0465	9.91728	10.13	10.0352	9.99267	9.56933	9.94491	9.72798	9.71595	9.99023	9.8683	9.99023
1416732_at	8.14504	8.03748	8.28362	8.18222	8.13538	8.09878	8.1239	8.23003	8.17726	8.11458	7.88361	8.01755	8.08385	8.04238	8.07917	7.90097	8.1239
1416733_at	8.2048	8.04787	8.00636	8.16744	8.01033	8.10831	8.13144	8.15354	8.14534	8.07833	7.88917	8.03022	8.16616	8.07833	8.21514	8.0423	8.03226
1416734_at	5.171	5.02206	5.11745	5.01537	5.02179	5.13759	5.29595	5.17274	5.18211	4.88251	5.18211	5.42708	5.29449	5.18711	5.59279	5.17274	5.01515
1416735_at	9.71579	9.75734	9.66798	9.79514	9.7096	9.75452	9.65459	9.69199	9.78505	9.62006	9.59773	9.74327	9.71609	9.79984	9.66197	9.61831	9.73377
1416736_at	9.40029	9.55561	9.33016	9.42474	9.29844	9.30374	9.2862	9.21181	9.15588	9.51731	9.41977	9.3996	9.47529	9.20424	9.49603	9.35286	9.35567
1416737_at	7.75613	7.76633	7.72431	7.76633	7.83314	7.73469	7.74795	7.74431	7.63333	7.74079	7.8788	7.76605	7.69212	7.92805	7.88274	7.88056	7.79081
1416738_at	9.7537	9.68098	9.70093	9.76558	9.55384	9.67079	9.66663	9.76156	9.62428	9.83669	9.61387	9.82826	9.78407	9.45168	9.67384	9.85438	9.71512
1416739_a_at	6.87058	6.52875	6.89052	6.52588	6.62466	6.7844	6.92262	6.64869	6.90551	6.89702	6.88712	6.92856	7.05227	6.55576	6.51347	6.76996	6.48438
1416740_at	4.62822	4.73259	4.42114	4.6247	5.05577	4.75092	4.50704	5.05094	4.85141	4.68051	4.75718	4.61191	4.75092	4.78755	4.8365	4.92637	4.75718
1416741_at	5.04881	5.18313	4.98633	5.19455	5.19455	5.36053	5.07625	5.41917	5.19455	5.28967	5.13021	5.51173	5.07506	5.23938	5.36178	5.33759	5.12323
1416742_at	9.99878	9.97778	9.957	10.1537	10.1134	10.1221	9.9847	9.91976	9.86987	10.0476	9.71593	10.1768	10.1825	10.1797	10.1556	10.0033	10.0927
1416743_at	8.89982	8.94446	8.88736	8.85397	8.89879	8.9589	8.90427	8.61289	8.81173	8.85551	8.63871	8.93842	8.92651	8.92172	8.93716	8.69425	8.92505
1416744_at	3.69772	3.65199	3.70544	3.75123	3.83331	3.70437	3.79661	3.8184	3.73443	3.81149	3.77602	3.68501	3.74359	3.77233	3.77446	3.75123	3.75123
1416745_x_at	5.64538	5.73106	5.78306	5.56019	5.62232	5.69564	5.78611	5.93355	5.63316	5.74336	5.55843	5.9428	5.78834	5.99628	5.65698	5.74336	5.80093
1416746_at	9.97421	9.98871	9.91211	9.97201	9.82132	9.95279	9.95482	9.88385	9.91456	10.023	9.88117	9.99521	9.80969	9.65312	9.75097	9.85554	9.87725
1416747_at	9.33495	9.43666	9.40529	9.39473	9.33495	9.33464	9.35867	9.26117	9.2522	9.35121	9.31199	9.446	9.40054	9.34756	9.22446	9.20131	9.38965
1416748_a_at	5.95265	5.99376	5.92979	5.97589	6.04577	6.11893	6.01164	5.97241	5.95582	5.77733	5.8149	5.96563	6.11696	6.16776	5.96563	5.71375	5.98702
1416749_at	11.6599	11.5025	11.5776	11.4781	11.3934	11.2984	11.6572	11.5788	11.5949	11.9169	11.6822	11.7175	11.6712	11.5376	11.5469	11.9286	11.7136
1416750_at	7.97184	8.08072	8.13185	8.02628	8.02344	8.09905	8.03422	8.12597	8.14694	8.10769	7.9652	8.31372	8.18739	8.16365	8.0932	8.05323	8.01364
1416751_a_at	7.42959	7.40165	7.31155	7.6422	7.34581	7.38639	7.38385	7.30683	7.38385	7.5308	7.1638	7.22416	7.53086	7.43583	7.24693	7.22367	7.48563
1416752_at	5.41934	5.78461	5.66466	5.90095	5.48619	5.8468	5.78461	5.82975	5.94368	5.84324	6.00141	5.72385	5.21778	5.63414	5.54709	5.80447	5.91786
1416753_at	12.2477	12.2209	12.1156	12.175	12.088	12.1941	12.1387	12.1589	12.0499	12.2175	12.1025	12.2563	12.1636	11.9264	11.9642	12.144	12.1567
1416754_at	11.3722	11.2135	11.2595	11.2757	11.358	11.5167	11.3774	11.394	11.2987	11.3987	11.337	11.502	11.3555	11.0318	11.1611	11.358	11.1988
1416755_at	10.3676	10.1538	10.0282	10.2965	10.0361	10.175	10.2213	10.2013	10.2158	10.2133	10.13	10.3201	10.1921	10.19	10.0987	10.0426	10.2833
1416756_at	9.64668	9.52706	9.61498	9.52797	9.59635	9.67827	9.64668	9.66903	9.68633	9.6953	9.63868	9.9482	9.61466	9.69841	9.66425	9.67458	9.77911
1416757_at	5.46423	5.22789	5.34828	5.42758	5.35131	5.34079	5.34828	5.43179	5.30082	5.46538	5.00194	5.3022	5.46668	5.46549	5.29139	5.37844	5.27565
1416758_at	7.63904	7.68822	7.65301	7.64313	7.64313	7.64313	7.63076	7.63986	7.6899	7.61136	7.78226	7.63674	7.53013	7.72663	7.49181	7.78073	7.55194
1416759_at	5.91631	5.80297	5.56421	6.10677	5.6606	5.57953	5.75813	5.5728	5.43031	5.54712	5.52527	5.5756	5.8397	5.55455	5.5078	5.61933	5.2324
1416760_at	10.8498	10.8875	10.8836	10.8193	10.8624	10.829	10.8247	10.71	10.7852	10.8837	10.9128	10.8954	10.9339	10.5882	10.661	10.9118	10.7392
1416761_at	4.07926	4.28766	4.23187	4.08084	4.39922	4.32775	4.3364	4.28852	4.37388	4.19682	4.34782	4.28766	4.22294	4.33562	4.36468	4.28766	4.36831
1416762_at	8.5033	8.68389	8.69313	8.7443	8.8444	8.87989	8.74891	8.8444	8.8093	8.6391	8.50871	8.85135	8.78026	8.95065	8.93629	8.70847	8.79413
1416763_at	10.5686	10.5259	10.6681	10.7345	10.7447	10.6368	10.6689	10.6839	10.6701	10.671	10.486	10.6708	10.7049	10.7414	10.7528	10.6476	10.6657
1416764_at	10.5326	10.6022	10.6124	10.5881	10.8155	10.7764	10.6573	10.5393	10.6681	10.591	10.5333	10.7229	10.7631	10.6719	10.6607	10.6331	10.4746
1416765_s_at	11.0206	10.9769	11.1781	11.2522	11.1454	11.2279	11.192	11.2182	11.1775	11.0323	10.8204	10.9403	11.156	11.1088	11.2232	11.1508	11.1925
1416766_at	9.88356	10.0232	9.9608	10.0589	10.1105	10.2243	9.96612	9.80382	10.0284	10.0505	9.92546	10.1514	10.1258	10.1248	10.0123	10.2214	10.0394
1416767_a_at	10.3244	10.2552	10.6687	10.6337	10.2759	10.5374	10.6206	10.5654	10.5971	10.5083	10.1488	10.3053	10.3832	10.1066	10.6312	10.531	10.4803
1416768_at	11.1424	11.0095	11.1563	11.1475	11.1762	11.1644	11.1774	11.0493	11.1182	11.2366	11.099	11.1121	11.222	11.0981	11.2513	11.1357	11.22
1416769_s_at	11.4883	11.6057	11.6053	11.6636	11.6118	11.6912	11.6959	11.6934	11.7039	11.6492	11.4864	11.6118	11.5227	11.6413	11.7049	11.5806	11.5664
1416770_at	10.778	10.8983	10.8298	10.737	10.7601	10.8137	10.8737	10.4981	10.7712	10.6639	10.6445	10.6591	10.7798	10.6855	10.6416	10.7034	10.6422
1416771_at	10.499	10.4799	10.6388	10.6609	10.5881	10.6055	10.6151	10.6356	10.6759	10.4963	10.4579	10.5391	10.4542	10.5422	10.5174	10.4753	10.527
1416772_at	7.23406	7.19232	7.03712	7.30442	7.19266	7.3326	7.19608	7.22722	7.26033	6.99166	6.97315	7.17218	6.98141	7.13461	7.26917	7.40845	7.2307
1416773_at	8.33768	8.31482	8.30777	8.31482	8.21632	8.33128	8.29152	8.4942	8.28886	8.31482	8.38365	8.26044	8.3476	8.21821	8.22266	8.27394	8.3719
1416774_at	7.11751	7.1971	7.28088	6.97864	7.27237	7.28934	7.26478	7.32126	7.18209	7.26219	7.2704	7.23237	7.23237	7.16474	7.12558	7.40753	7.23237
1416775_at	8.11468	8.21264	8.21934	8.37545	8.01817	8.30156	8.27715	8.21206	8.18708	8.39477	8.0361	8.23487	8.33673	8.10276	8.19787	8.19595	7.97708
1416776_at	11.4867	11.6476	11.7628	11.7066	11.7079	11.6774	11.706	11.7491	11.814	11.7147	11.513	11.6578	11.7313	11.406	11.6538	11.6739	11.5303
1416777_at	4.07628	4.00299	4.03756	3.90772	3.84384	3.92437	4.05839	3.8133	3.92437	4.28337	3.94561	4.00006	3.80531	3.8501	3.72568	4.06886	3.92437
1416778_at	7.29054	7.14333	7.14393	7.37309	7.30951	7.24753	7.15539	7.42989	7.34223	7.42158	7.24254	7.12753	7.50667	7.40789	7.28641	7.62871	7.42963
1416779_at	5.869	6.21968	6.63907	6.60347	6.14531	6.75486	6.3787	6.4869	6.44206	6.55319	5.89864	6.09696	6.45964	6.4157	6.81394	6.7908	6.57326
1416780_at	11.9134	11.8078	11.7158	11.7391	11.6916	11.7565	11.8279	11.6798	11.7268	11.759	11.6533	11.7964	11.7424	11.5902	11.6954	11.7474	11.7233
1416781_at	10.1415	10.2745	10.1796	10.2518	10.3689	10.4042	10.3006	10.1518	10.3032	10.2945	10.1772	10.3098	10.3468	10.3185	10.3225	10.2918	10.2574
1416782_s_at	10.5124	10.6504	10.5791	10.6799	10.6797	10.7508	10.6213	10.4256	10.5038	10.6574	10.4384	10.6893	10.7616	10.5952	10.7504	10.6703	10.6839
1416783_at	9.62605	9.51196	9.50777	9.69002	9.42201	9.77139	9.62364	9.64709	9.57563	9.44343	9.16389	9.66188	9.57702	9.57702	9.67318	9.54581	9.74719
1416784_at	3.5328	3.66192	3.5661	3.52051	3.7189	3.58629	3.94066	3.39985	3.60495	3.67211	3.63763	3.92457	3.73527	3.49653	3.83774	3.37712	3.74331
1416785_at	8.18672	8.458	8.33837	8.42315	8.36183	8.45273	8.30105	8.09574	8.17676	8.36993	7.89978	8.37928	8.49618	8.19633	8.3903	8.33837	8.24517
1416786_at	8.33113	8.51255	8.35079	8.14221	8.3696	8.40005	8.49966	7.99711	8.14764	8.45636	8.22362	8.42968	8.29029	8.08142	8.40688	8.14916	8.39718
1416787_at	5.92804	5.84488	5.98371	5.95417	6.08298	5.90965	5.95571	6.00203	5.91037	5.91869	6.08487	6.03534	5.82037	6.20865	6.15758	6.03283	5.99352
1416788_a_at	10.9841	10.8928	11.0047	10.985	10.915	11.0141	10.9632	11.0824	11.0836	10.8746	10.8579	10.9428	11.0008	10.8452	10.8021	10.9059	10.9388
1416789_at	11.5053	11.4498	11.4754	11.5511	11.4905	11.5226	11.4815	11.5425	11.5073	11.4874	11.3188	11.4815	11.5031	11.3327	11.4168	11.4627	11.4569
1416790_a_at	9.46642	9.24025	9.36894	9.39046	9.10805	9.26047	9.33594	9.57733	9.35063	9.27015	9.34857	9.17304	9.39826	9.2609	9.14545	9.00322	9.30079
1416791_a_at	9.26949	9.23885	9.03848	9.28626	9.07043	8.95705	8.92133	9.1853	9.16729	9.35214	9.2104	9.15292	9.17056	9.22369	9.12204	9.08043	9.12339
1416792_at	9.78398	9.9434	9.83767	9.79425	9.79148	9.84831	9.8165	9.6373	9.69786	9.75668	9.70074	9.76098	9.82374	9.63096	9.74552	9.67381	9.67807
1416793_at	9.85496	9.94348	9.84755	9.90933	9.83496	9.91886	9.85214	9.9	9.92234	9.9	9.76112	9.9674	10.0149	9.96462	9.82175	9.84243	9.94492
1416794_at	8.74792	8.83951	8.89921	8.87368	8.89415	8.97787	8.91382	8.8102	8.96913	8.82563	8.53858	8.97538	9.06753	8.79356	8.79261	8.72209	8.94021
1416795_at	7.78871	7.72509	7.90296	7.71134	7.82627	7.91457	7.87401	7.81047	7.80911	7.85259	7.5748	7.43025	7.77645	7.71705	7.94568	7.84944	7.69303
1416796_at	9.28959	9.35218	9.31002	9.27575	9.20763	9.25291	9.22508	9.20217	9.18977	9.2396	9.09729	9.22508	9.1798	9.01148	9.34338	9.35578	9.14228
1416797_at	7.24109	7.25726	7.57297	7.02152	7.3171	7.30017	7.33878	7.0274	7.29707	7.38091	7.20653	7.1668	7.46211	7.1847	7.29425	7.08639	7.02215
1416798_a_at	6.50992	6.78312	6.73612	6.8106	6.9408	6.73126	6.69341	6.67269	6.75885	6.69886	6.81181	6.62321	6.51432	6.83384	6.74407	6.64576	6.65509
1416799_at	8.65169	8.52685	8.70325	8.75757	8.60326	8.48953	8.70273	8.60639	8.56033	8.79314	8.49737	8.3563	8.63602	8.55292	8.71471	8.41613	8.62448
1416800_at	8.71638	8.74385	8.8294	8.83566	8.74385	8.62409	8.64463	8.69581	8.72351	8.99489	8.804	8.58229	8.85306	8.70924	8.94041	8.86508	8.70479
1416801_at	4.79166	4.97522	5.22352	4.71668	4.88462	5.11677	4.63507	4.8683	5.07562	5.0987	5.08926	5.28406	4.82264	4.88019	5.06776	5.02147	5.10694
1416802_a_at	3.83228	3.65517	3.82041	3.86306	3.85945	3.84325	3.88273	3.83228	3.9902	3.98877	3.76658	3.97132	3.77504	3.83228	3.86555	3.6644	3.83228
1416803_at	6.9159	6.60569	6.92438	7.17714	6.96626	7.36748	7.00662	7.1432	7.3355	6.76685	6.83888	6.96626	7.0093	7.26531	6.83414	6.92474	6.88685
1416804_at	6.21834	5.84344	5.873	6.23106	5.81723	6.05435	6.03823	5.98912	5.67516	5.96024	5.85449	5.98503	6.30344	6.00731	5.8248	5.65944	5.96024
1416805_at	5.14493	4.99373	5.08205	5.31549	4.86418	5.2634	5.32239	5.30211	5.22259	4.81152	4.9031	4.76729	5.10806	4.91306	4.8786	5.14864	5.02739
1416806_at	7.09157	7.06191	7.02223	6.92568	7.09973	7.12613	6.89888	7.0849	7.03555	7.0583	7.07385	7.29947	7.24851	7.21133	6.99209	7.21909	7.00079
1416807_at	11.8356	11.8831	12.0156	11.9746	12.1553	12.0563	12.0049	12.028	12.0466	11.9766	11.8018	12.1156	12.0503	12.0896	12.132	12.0102	12.0411
1416808_at	6.63034	6.63266	6.35186	6.5881	6.37536	7.01867	6.58063	6.91157	7.0279	6.60456	6.54208	6.46931	6.46652	6.57534	6.60456	6.74654	6.72176
1416809_at	4.10613	3.73372	3.93548	3.68054	3.87653	3.90807	3.47515	3.63691	3.86102	3.78981	3.89644	3.71879	3.87653	4.10559	3.86102	4.10667	3.90145
1416810_at	9.99221	10.0615	10.1492	10.1857	10.2686	10.1836	10.187	10.204	10.1983	10.1379	10.0041	10.304	10.259	10.2996	10.315	10.2756	10.114
1416811_s_at	6.26067	6.5252	6.43294	6.67547	6.69042	6.75897	6.53512	6.87335	7.03063	6.8168	6.53169	6.73362	6.78158	7.00671	7.15594	6.86876	6.90793
1416812_at	10.0253	9.93968	9.68673	9.81286	9.76883	9.54331	9.56287	9.83626	9.76385	10.0256	9.81906	9.79372	9.86813	9.79778	9.92044	9.8592	9.67084
1416813_at	9.15471	9.16229	8.9853	9.17978	9.04234	8.86085	8.88605	8.91419	8.87157	9.3745	9.12568	8.95014	9.23291	9.12318	9.1953	8.98364	8.9339
1416814_at	10.0285	9.77065	9.73235	9.88417	9.66467	9.51016	9.73613	9.73613	9.59307	9.91719	9.70519	9.6233	9.89069	9.61196	9.77151	9.68482	9.69175
1416815_s_at	10.6349	10.5863	10.6234	10.6551	10.6605	10.6827	10.7132	10.7377	10.8135	10.6638	10.6328	10.5606	10.5331	10.5626	10.4645	10.5443	10.6197
1416816_at	10.0458	10.1658	9.99797	10.2151	10.1331	10.2007	10.1331	10.0213	9.94221	10.1166	9.90045	10.173	10.1746	10.2335	10.1573	10.0879	10.2609
1416817_at	6.79997	6.85991	6.78093	6.73109	6.79549	6.96539	6.79997	6.89089	6.81301	6.75903	6.84827	6.87955	6.88405	6.84938	6.67324	6.6939	6.68882
1416818_at	6.92835	7.09036	7.01924	6.92188	7.09545	7.2438	7.05674	7.08422	7.03439	7.37109	7.0065	7.33947	7.05674	6.3625	6.92681	7.30643	7.00911
1416819_at	10.9516	10.9952	10.9178	10.9952	11.0343	11.0643	11.0729	10.903	11.0979	11.0373	10.9016	11.0543	11.0998	10.9874	10.9952	10.9781	10.8492
1416820_at	6.37561	6.33412	6.39797	6.48506	6.40526	6.52424	6.49974	6.3157	6.36887	6.41936	6.41756	6.30081	6.6397	6.13198	6.28432	6.4051	6.364
1416821_at	7.03932	7.10747	7.11728	7.28702	7.11728	7.14603	7.13491	7.12241	7.11728	7.23307	7.14439	7.24871	6.95302	7.07387	7.03993	7.06024	6.93021
1416822_at	7.0815	7.16522	7.08013	7.06246	6.93966	6.98151	7.0815	7.08338	7.09008	7.31092	7.02316	6.97415	7.159	7.0289	7.01112	7.14346	7.10357
1416823_a_at	10.3098	10.3614	10.2876	10.3666	10.3731	10.4896	10.3029	10.293	10.2751	10.3375	10.1571	10.2718	10.2836	10.2087	10.3409	10.2465	10.4102
1416824_at	9.69168	9.53554	9.67637	9.79888	9.77696	9.83524	9.78655	9.78284	9.66839	9.7494	9.57635	9.83487	9.71819	9.81921	9.77418	9.66102	9.70191
1416825_at	8.7393	9.02284	8.92031	8.99034	8.81279	8.9884	8.82837	8.76947	8.75088	8.98712	8.8737	8.92821	8.76238	8.89088	9.03301	8.67472	8.88259
1416826_a_at	8.52851	8.50351	8.67352	8.54697	8.27573	8.35155	8.56853	8.65836	8.57456	8.76934	8.85305	8.66644	8.90676	8.86372	8.58195	8.60392	8.85544
1416827_at	6.55771	6.59786	6.81871	6.77029	6.73743	6.91223	6.80396	6.82094	6.93356	6.77493	6.81871	6.94192	6.77241	6.90353	6.77447	6.90381	6.84938
1416828_at	13.6538	13.6758	13.7427	13.7092	13.6194	13.6338	13.6254	13.6596	13.6469	13.5723	13.4907	13.4611	13.6357	13.4797	13.7052	13.635	13.6748
1416829_at	13.6446	13.6403	13.7251	13.6704	13.6554	13.727	13.6704	13.6454	13.686	13.7003	13.6458	13.6667	13.709	13.6161	13.6344	13.6602	13.6805
1416830_at	8.91063	8.93443	8.85197	8.93522	8.77758	8.974	8.95821	8.98529	9.0281	9.03696	8.92554	9.00694	8.91311	8.98908	8.83366	9.01849	8.84264
1416831_at	8.60814	8.47116	8.47771	8.52485	8.59434	8.58665	8.58781	8.44064	8.3922	8.58111	8.42409	8.49673	8.50454	8.22265	8.40721	8.37807	8.24267
1416832_at	5.25673	5.2823	5.28186	5.40996	5.34796	5.49725	5.55594	5.22161	5.30258	4.96439	5.23443	4.95938	5.01782	5.07541	5.32523	5.07062	5.56308
1416833_at	4.15892	4.14427	4.1963	4.15115	4.24688	4.41107	4.18717	4.24637	4.42121	4.22495	4.25014	4.35113	4.05132	4.12848	4.11796	4.41892	4.21336
1416834_x_at	10.8563	10.9218	11.0408	11.0702	11.0462	11.0841	11.0299	11.0977	11.1274	10.9546	10.9675	11.1865	11.1287	11.1564	10.9946	11.03	11.1144
1416835_s_at	11.0471	10.9518	11.1059	10.9846	11.157	11.1059	11.0553	11.1118	11.1059	11.1678	11.0428	11.2643	11.2232	11.0435	11.1249	11.1292	11.187
1416836_at	9.42989	9.30368	9.17049	9.30744	9.20924	9.23407	9.25479	9.14706	9.22576	9.17859	9.2814	9.3284	9.15715	9.0776	9.04384	9.17723	9.18716
1416837_at	8.88581	9.06451	8.99236	9.03436	9.02925	9.00675	9.14022	9.08423	9.07414	9.01757	8.95986	9.12349	9.03424	9.04806	9.12537	8.90323	8.97353
1416838_at	9.69762	9.5486	9.49812	9.58942	9.65378	9.54752	9.68168	9.57185	9.55696	9.61147	9.52052	9.60939	9.54289	9.7761	9.49484	9.6658	9.58589
1416839_at	3.24946	3.23746	3.43688	3.39008	3.31795	3.58682	3.26678	3.33962	3.50449	3.53081	3.27007	3.60812	3.58543	3.17761	3.32897	3.40011	3.35496
1416840_at	10.7102	10.7605	10.6801	10.6786	10.6489	10.8442	10.6517	10.5894	10.68	10.5909	10.5177	10.6647	10.5901	10.4347	10.544	10.4584	10.6049
1416841_at	9.16545	9.11564	9.3154	9.25874	9.31577	9.28334	9.24425	9.27052	9.31662	9.07811	9.09336	8.97192	9.2422	9.06499	9.14904	9.15044	9.18018
1416842_at	12.4061	12.4605	12.6253	12.5832	12.7243	12.6457	12.5338	12.3855	12.5299	12.5083	12.3868	12.5716	12.6342	12.5871	12.5956	12.6117	12.6256
1416843_at	9.65491	9.61225	9.54941	9.77071	9.6887	9.67094	9.80632	9.71097	9.56583	9.62003	9.5027	9.68216	9.62705	9.54722	9.64337	9.52285	9.63153
1416844_at	10.6941	10.6075	10.5617	10.6068	10.4601	10.58	10.6317	10.7371	10.7527	10.7261	10.9369	10.7387	10.8245	10.9308	10.5047	10.6338	10.6734
1416845_at	10.5376	10.5492	10.3454	10.4904	10.4345	10.4113	10.3654	10.4828	10.3541	10.4779	10.4087	10.551	10.3192	10.1833	10.3646	10.3669	10.3325
1416846_a_at	7.73636	7.60397	7.37593	7.70313	7.25595	7.91795	7.42146	7.53154	7.34743	7.55235	7.00632	7.53198	7.47603	7.48395	7.09261	7.06695	7.56711
1416847_s_at	3.44871	3.60156	3.68416	3.61407	3.71348	3.64668	3.49421	3.60156	3.54272	3.60156	3.82315	3.64654	3.48971	3.58388	3.48207	3.60156	3.89576
1416848_at	8.74142	8.69789	8.95848	8.88149	8.80289	8.87487	8.90989	9.05549	9.01081	8.82409	8.76727	8.91311	8.81964	8.78036	8.73536	8.84205	8.92159
1416849_at	10.8333	10.8857	10.8754	10.9344	10.9097	10.8921	10.8921	10.9258	10.8206	10.8356	10.6222	10.8725	10.9425	10.8674	10.943	10.8921	10.8849
1416850_s_at	11.6772	11.732	11.6869	11.8556	11.8017	11.7769	11.7884	11.7555	11.7005	11.792	11.6604	11.8641	11.7769	11.6849	11.8913	11.8461	11.8271
1416851_at	6.82039	6.73794	6.86038	6.75155	6.83161	6.68013	6.90419	6.82039	6.84563	6.84644	6.79155	6.96145	6.73055	6.89483	6.82039	6.78801	7.10649
1416852_a_at	13.4387	13.4302	13.4527	13.3574	13.2317	13.2127	13.4183	13.3231	13.27	13.4455	13.3635	13.2244	13.2834	13.0121	13.2536	13.2989	13.2157
1416853_at	13.1516	13.2455	13.218	13.0695	13.0533	13.0562	13.1636	13.0124	13.0004	13.2251	13.2243	13.0844	13.1777	12.7194	13.1052	13.1238	13.0117
1416854_at	6.48699	6.50588	6.57771	6.4	6.71117	6.56835	6.63262	6.47823	6.6298	6.54514	6.70283	6.8668	6.34818	6.6343	6.59519	6.72887	6.73683
1416855_at	8.29019	8.33696	8.20947	8.31082	8.06685	8.48265	8.33824	8.4796	8.60131	8.13956	8.32412	8.53257	7.96537	8.28602	8.38464	8.25026	8.47769
1416856_at	9.11111	9.03783	9.10179	9.24094	9.17421	9.1384	9.10045	9.06898	8.96267	9.11761	8.97346	9.10179	9.17756	8.97163	9.16417	9.178	9.18216
1416857_at	10.7033	10.5898	10.6921	10.713	10.7453	10.701	10.6599	10.7625	10.7274	10.7443	10.6635	10.816	10.8654	10.8226	10.7166	10.714	10.6678
1416858_a_at	10.7992	10.7317	11.1137	11.0857	10.7783	11.0222	11.0659	10.9982	10.9277	10.8639	10.609	10.7705	10.7507	10.807	11.1827	10.9038	10.9936
1416859_at	10.847	10.8194	10.9238	11.1025	11.0781	10.9877	11.0168	11.0092	10.9519	10.934	10.7067	10.9287	10.9489	10.9463	11.0579	11.023	10.8865
1416860_s_at	9.24749	9.09602	9.21607	9.44704	9.13929	9.19423	9.29209	9.36923	9.21607	9.15504	8.96783	9.13671	9.25473	9.33182	9.16316	9.14701	9.42267
1416861_at	9.61302	9.65699	9.67225	9.73175	9.63089	9.67002	9.60268	9.59482	9.61058	9.62313	9.45734	9.52039	9.66572	9.49777	9.73118	9.46487	9.72137
1416862_at	8.98001	8.99722	8.8978	8.95233	8.85709	8.91021	8.88772	8.85162	8.86804	8.83188	8.71603	8.69542	8.9194	8.7034	8.82823	8.82155	8.99186
1416863_at	10.0663	10.1714	10.0606	10.2253	10.2044	10.186	10.1714	10.0248	9.96266	10.3021	10.1566	10.297	10.2589	10.1668	10.2158	10.3286	10.1202
1416864_at	7.66305	7.84042	7.81741	8.07724	7.84042	7.87684	7.87278	7.94459	7.73893	7.84042	7.83618	7.67547	7.82509	7.77335	7.97085	7.73873	7.85643
1416865_at	7.40303	7.69186	7.43932	7.52603	7.35303	7.3705	7.5771	7.35303	7.40918	7.35303	7.29585	7.15874	7.30287	7.17773	7.25479	7.24783	7.30424
1416866_at	7.75483	7.80083	7.9088	8.03631	7.64619	7.9088	7.9426	7.81253	7.83172	8.03587	7.81841	8.05625	7.89571	7.97493	7.99501	7.86468	8.03165
1416867_at	6.48083	6.29557	6.77928	6.50614	6.69659	6.75024	6.76896	6.69659	7.03875	6.66151	6.68466	6.55854	6.79915	6.83244	6.82543	6.67	6.63782
1416868_at	7.07448	7.33048	7.35407	7.10806	7.20538	7.26584	7.07259	7.10323	7.18708	7.1923	7.12846	7.18708	7.18708	7.35803	6.97132	7.33422	7.12516
1416869_x_at	7.51442	7.63183	7.39611	7.59609	7.39498	7.23866	7.19752	7.28283	7.27936	7.55555	7.45662	7.45425	7.72403	7.23333	7.44534	7.32444	7.18708
1416870_at	8.53203	8.60674	8.61326	8.5325	8.61907	8.60674	8.66028	8.52506	8.68655	8.67907	8.6078	8.62433	8.88341	8.66827	8.58006	8.67648	8.50069
1416871_at	5.3957	5.17575	5.06389	5.31608	5.46664	5.27288	5.1656	5.39905	5.44732	5.36266	5.82119	5.63308	5.43954	5.39905	5.51173	5.32414	5.35794
1416872_at	8.41204	8.34557	8.45001	8.55848	8.4898	8.54331	8.49559	8.41709	8.52039	8.47602	8.23183	8.49061	8.45491	8.58834	8.45829	8.40089	8.48064
1416873_a_at	5.71616	5.67744	5.73625	5.58711	5.79533	5.84091	5.72364	5.71616	5.71616	5.70021	5.77754	5.57245	5.69208	5.82239	5.88568	5.62532	5.64121
1416874_a_at	7.66887	7.73024	7.64991	7.77816	7.40875	7.71179	7.60456	7.58799	7.54574	7.61006	7.53969	7.57087	7.69591	7.44077	7.6204	7.29703	7.49874
1416875_at	7.45296	7.72819	7.65384	7.58071	7.61682	7.55484	7.52499	7.55094	7.65373	7.63708	7.67156	7.65418	7.59053	7.59693	7.48633	7.72402	7.55273
1416876_at	6.44004	6.47166	6.62272	6.57135	6.71581	6.68756	6.61115	6.42345	6.55405	6.60854	6.5541	6.76664	6.68326	6.40471	6.62231	6.72847	6.64874
1416877_a_at	10.0381	10.0806	10.2264	10.3338	10.343	10.2496	10.254	10.2314	10.2163	10.179	9.99248	10.151	10.2801	10.1976	10.3778	10.3002	10.2373
1416878_at	6.98891	7.04843	7.22759	6.98185	7.18711	7.21971	7.16325	6.83931	7.33265	7.2452	7.28317	7.45823	7.45535	7.2216	7.32702	7.32135	7.16298
1416879_at	6.39745	6.0769	6.47725	6.31842	6.38604	6.10961	6.41226	6.33813	6.53066	6.4934	6.35906	6.44916	6.57768	6.39378	6.44692	6.42975	6.36546
1416880_at	9.62121	9.63673	9.60643	9.67594	9.56915	9.63111	9.53327	9.55739	9.42449	9.67464	9.62955	9.46915	9.71966	9.56553	9.67949	9.62409	9.72486
1416881_at	7.62689	7.76127	7.92643	7.71886	7.77179	7.98017	7.74991	7.57525	7.62135	8.05669	7.77179	7.83674	8.00654	7.57118	7.87583	7.84899	7.90172
1416882_at	9.63142	9.59603	9.57058	9.72524	9.7963	9.70727	9.62163	9.6122	9.55938	9.74778	9.66223	9.79784	9.76817	9.84127	9.7412	9.66923	9.67304
1416883_at	11.0496	11.2048	11.056	11.0551	11.0845	11.1283	11.0717	11.032	11.1397	11.0778	11.2037	11.1959	11.0679	11.1623	10.9975	11.0925	11.0925
1416884_at	11.3149	11.3464	11.3307	11.4957	11.2207	11.201	11.2717	11.0592	11.0477	11.1446	10.8642	11.0552	11.3482	10.9935	11.4913	11.1587	11.1745
1416885_at	8.55696	8.46669	8.34987	8.57496	8.42857	8.38447	8.42116	8.48819	8.53062	8.42213	8.36893	8.35402	8.43934	8.47463	8.15011	8.30318	8.36479
1416886_at	6.18589	6.06516	6.34213	6.40865	6.17923	6.10677	6.3923	6.17126	6.14812	6.12396	5.76836	5.78245	6.46844	6.05845	6.26767	5.90163	6.31055
1416887_at	4.32393	4.19185	4.32393	4.25699	4.51351	4.32393	4.25463	4.36316	4.37827	4.24812	4.28778	4.48421	4.32393	4.41129	4.32615	4.45457	4.32465
1416888_at	6.82986	6.87715	6.85203	6.85733	6.90053	7.02516	6.93318	6.84422	6.99335	6.77648	6.9639	6.88879	6.67764	7.09962	6.7172	6.92574	6.88815
1416889_at	4.222	4.27647	4.28315	4.30443	4.35886	4.51922	4.20741	4.4211	4.45667	4.42272	4.39168	4.54459	4.22294	4.53795	4.33511	4.3224	4.27647
1416890_at	9.0874	8.98166	8.98798	9.18143	9.24364	9.17663	8.99422	9.05401	9.10462	9.08953	8.99049	8.99679	9.17974	9.11532	9.05116	9.08953	9.07849
1416891_at	8.87852	8.82376	8.68166	8.76413	8.70451	8.67236	8.62849	8.58592	8.57804	8.78006	8.77295	8.69326	8.74729	8.49792	8.53031	8.6846	8.68733
1416892_s_at	8.23029	7.94139	8.08909	8.16706	8.19656	8.21849	8.23764	8.42707	8.19656	8.18554	8.19127	8.16602	8.28058	8.21725	8.22107	8.12816	8.2572
1416893_at	7.4758	7.57085	7.60686	7.29726	7.63033	7.62593	7.73327	7.56138	7.5705	7.61409	7.70329	7.80253	7.87346	7.64445	7.60748	7.73799	7.72062
1416894_at	9.04203	9.15364	9.16676	9.07197	9.17113	9.22544	9.2088	9.10299	9.15983	9.19884	9.13522	9.0744	9.27667	9.13522	9.13522	9.13522	9.08187
1416895_at	6.38072	6.3718	6.2253	6.5789	6.43649	6.51851	6.2654	6.5003	6.46212	6.41243	6.43331	6.72935	6.46552	6.45446	6.31619	6.22429	6.39184
1416896_at	7.10202	7.23577	7.05355	7.08569	7.24246	7.09319	7.14393	7.06344	7.06373	7.07761	7.11632	7.14333	6.97012	7.07636	6.92865	6.96491	6.98419
1416897_at	5.84918	6.08297	6.25176	6.33026	6.22184	6.13324	6.27451	6.19296	6.30427	6.22097	6.18957	6.14555	6.21076	6.46844	6.28428	6.37381	6.25176
1416898_a_at	6.97528	7.27778	7.21092	7.31524	7.24592	7.15879	7.14393	7.10968	7.20856	7.19489	7.37352	7.28575	7.23966	7.64789	7.42084	7.21214	7.31073
1416899_at	6.61129	6.62645	6.74536	6.59404	6.78918	6.63296	6.69169	6.55834	6.766	6.69986	6.84648	6.87892	6.75382	6.70584	6.68582	6.75375	6.68471
1416900_s_at	9.50858	9.73603	9.53009	9.52032	9.42725	9.43132	9.57979	9.49378	9.3921	9.62744	9.60383	9.54254	9.49768	9.16812	9.40231	9.35918	9.37538
1416901_at	10.3909	10.3494	10.3503	10.4363	10.4615	10.5018	10.4438	10.4763	10.5308	10.4284	10.3727	10.5979	10.3874	10.6033	10.409	10.4755	10.3858
1416902_a_at	12.6594	12.6915	12.6973	12.7533	12.7965	12.7888	12.7525	12.6698	12.6841	12.6544	12.6268	12.7148	12.7641	12.7564	12.7437	12.6884	12.7807
1416903_at	9.26875	9.27685	9.21672	9.32164	9.03214	9.275	9.23729	9.29332	9.29214	9.35188	9.13152	9.34871	9.03666	9.12748	9.14538	9.19235	9.18307
1416904_at	11.1852	11.1638	11.1035	11.251	11.1368	11.1794	11.1108	11.1671	11.1255	11.1564	10.9215	11.1071	11.0754	11.0114	11.1255	11.1255	11.1277
1416905_at	4.66375	4.98502	4.86069	4.88545	5.12726	4.9515	4.92083	4.61964	4.83286	4.77811	5.05991	5.17991	4.92083	4.72582	5.08686	5.18679	4.99299
1416906_at	11.3966	11.4006	11.3523	11.4071	11.3922	11.4153	11.2844	11.4296	11.3922	11.3673	11.4136	11.4413	11.3953	11.4798	11.3462	11.3922	11.3892
1416907_at	9.46631	9.54946	9.76334	9.63543	9.55413	9.70553	9.73688	9.45695	9.42324	9.64386	9.25749	9.28401	9.75779	9.28158	9.52356	9.56402	9.54392
1416908_s_at	10.3712	10.3328	10.3893	10.3941	10.3619	10.4047	10.3781	10.4299	10.4359	10.3937	10.2399	10.4362	10.4237	10.3304	10.1974	10.3066	10.3343
1416909_at	9.39371	9.42812	9.53922	9.4818	9.54479	9.50023	9.62434	9.68751	9.61393	9.45839	9.57819	9.62314	9.46386	9.7379	9.54034	9.49905	9.55454
1416910_at	9.86638	9.84242	9.91708	10.0066	9.90929	10.0392	9.93326	9.88191	9.95317	9.83189	9.67012	9.878	9.94725	9.92687	9.96672	9.92587	10.006
1416911_a_at	8.14498	8.09209	8.63934	8.62967	8.11371	8.43392	8.63187	8.3723	8.30097	8.11159	8.02144	8.27219	8.353	7.99045	8.75612	8.23634	8.49924
1416912_at	11.1859	11.1503	11.2621	11.2018	11.1272	11.2706	11.1673	11.1345	11.2206	11.2238	11.1693	11.2459	11.2285	11.1737	11.1218	11.2124	11.2333
1416913_at	4.13304	4.21696	4.05319	4.07924	4.09171	4.08569	4.05332	3.94803	4.09025	3.93459	4.15052	4.26821	3.98252	4.02513	4.2641	4.1329	4.16025
1416914_s_at	8.88664	8.95538	8.88664	9.00412	8.8811	8.88664	8.96905	8.88632	8.86652	8.91269	8.8152	8.88664	8.93837	8.7518	8.91193	8.91561	8.91891
1416915_at	7.85334	7.72282	7.77112	8.00218	7.59118	7.96201	7.8554	7.77032	7.68582	7.9396	7.52914	7.61146	7.85747	7.58774	7.6006	7.81058	7.89869
1416916_at	6.19718	6.0452	6.21962	5.93097	6.4364	6.37415	6.22482	6.43768	6.42601	6.44284	6.43159	6.54354	6.26249	6.49724	6.45386	6.3425	6.28614
1416917_at	8.54264	8.43638	8.46045	8.67168	8.59588	8.57949	8.63216	8.53851	8.608	8.63535	8.54554	8.60083	8.68327	8.58856	8.72783	8.58109	8.65299
1416918_at	10.7033	10.7296	10.6152	10.6572	10.5533	10.5119	10.6244	10.4647	10.4327	10.7634	10.5723	10.4828	10.6356	10.3371	10.5891	10.5946	10.528
1416919_a_at	7.83846	7.88059	7.8583	7.84182	8.01785	7.88059	7.87698	7.82369	7.94768	7.87228	7.98435	8.00617	7.89246	8.0016	7.8672	8.031	7.85679
1416920_at	7.32737	7.46507	7.53297	7.60485	7.38885	7.49383	7.55423	7.53849	7.57752	7.7261	7.68168	7.53091	7.64316	7.59454	7.73821	7.31751	7.65333
1416921_x_at	13.3406	13.4191	13.2911	13.37	13.2816	13.3812	13.3901	13.2536	13.3048	13.3843	13.2777	13.3225	13.1852	13.1374	13.4106	13.2867	13.32
1416922_a_at	11.1226	11.1249	10.9735	11.0659	11.1257	11.0431	11.0099	10.9899	11.0513	11.0331	10.9262	11.1782	11.1215	10.9977	11.1323	11.0079	11.0691
1416923_a_at	10.9329	10.8114	10.9537	11.0246	10.7929	10.9167	10.8954	10.9111	10.8206	10.9909	10.7558	10.9867	10.9111	10.8084	10.8722	10.8415	10.9346
1416924_at	9.61268	9.68149	9.61268	9.67863	9.67748	9.69829	9.61268	9.62651	9.56597	9.68729	9.57704	9.56801	9.61181	9.52676	9.51251	9.56862	9.53988
1416925_at	8.69746	8.85712	8.82492	8.69612	8.42584	8.79385	8.73994	8.55588	8.49499	8.88892	8.55154	8.79732	8.9096	8.34385	8.72244	8.71063	8.77695
1416926_at	8.17615	8.09471	8.39828	8.2821	8.36819	8.39	8.19484	8.36252	8.22403	8.68256	8.26123	8.42926	8.74827	8.4979	8.36252	8.57262	8.43364
1416927_at	5.48744	5.78393	5.78393	5.53621	5.78393	5.8093	5.82049	5.48928	5.64642	5.78564	5.72774	6.00029	5.79514	5.90809	5.83372	5.88595	5.84236
1416928_at	8.58558	8.44594	8.4225	8.19561	7.94685	8.20811	8.26326	8.22729	8.29732	8.39651	8.11613	8.14474	8.37092	7.86122	8.19802	8.21543	8.06893
1416929_at	5.50118	5.55047	5.69943	5.36707	5.40257	5.38479	5.57374	5.53665	5.72243	5.7646	5.382	5.32216	5.6228	4.74362	5.51446	5.44239	5.4305
1416930_at	5.22765	5.657	5.51436	5.56334	5.90921	5.80805	5.657	5.657	5.81264	5.4833	5.84461	5.6495	5.71423	5.62513	5.73706	5.88274	5.64505
1416931_at	8.20154	8.22667	8.16565	8.30106	8.25684	8.32598	8.30797	8.28282	8.38626	8.29064	8.17955	8.34506	8.26503	8.37178	8.24384	8.29868	8.32997
1416932_at	8.28294	8.23447	8.32175	8.2901	8.22983	8.26741	8.17451	8.34263	8.34559	8.15383	8.22797	8.15762	8.20589	8.28566	8.09525	8.30647	8.25191
1416933_at	9.47881	9.43159	9.3405	9.36418	9.44698	9.45343	9.42368	9.39365	9.41598	9.58299	9.51212	9.4547	9.44586	9.23322	9.2906	9.44493	9.30511
1416934_at	5.57809	5.96689	5.70396	5.6413	5.46914	5.65566	5.56164	5.74555	5.66966	5.41684	5.38418	5.2838	5.7732	5.3016	5.54104	5.6413	5.56722
1416935_at	7.52217	7.73495	7.6391	7.64146	7.5315	7.80624	7.58954	7.63119	7.59611	7.6391	7.64948	7.68386	7.71439	7.59611	7.51294	7.58736	7.64228
1416936_at	10.3713	10.5913	10.3399	10.3291	10.2525	10.2617	10.3149	10.0777	10.0759	10.3805	10.2791	10.3047	10.2634	10.0949	10.1603	10.1642	10.2491
1416937_at	12.0358	12.0981	12.0841	12.1212	12.2725	12.1955	12.1755	11.9906	12.0438	12.0702	12.0369	12.1935	12.1454	12.1212	12.1587	12.1755	12.1272
1416938_at	10.0327	10.1463	10.2667	10.2893	10.2945	10.2059	10.1956	10.1643	10.2525	10.1176	9.88446	10.2059	10.2602	10.2576	10.2571	10.2058	10.2744
1416939_at	10.9007	10.8162	10.819	10.9419	10.9495	10.9517	10.8938	10.9377	11.0035	10.9343	10.797	10.9847	10.937	10.9217	10.8399	10.8878	10.9116
1416940_at	9.19225	9.29787	9.28618	9.3059	9.23476	9.26485	9.21275	9.09309	9.11669	9.31186	9.24678	9.28713	9.32589	8.9191	9.14761	9.27816	9.11932
1416941_s_at	12.3051	12.2028	12.4506	12.3701	12.2392	12.3172	12.3422	12.4047	12.3503	12.2361	12.2437	12.2558	12.3016	12.1269	12.1757	12.2429	12.3849
1416942_at	5.08458	5.17178	5.18137	5.40698	5.39905	5.448	5.05033	5.19019	5.5472	5.07655	4.50891	5.43051	5.04608	5.36229	5.33023	5.37846	5.47729
1416943_at	11.192	11.1971	11.5699	11.3831	11.2352	11.364	11.3388	11.2916	11.2143	11.2219	10.9565	11.2916	11.2916	11.006	11.444	11.2788	11.311
1416944_a_at	7.3977	7.42875	7.42478	7.65584	7.40453	7.51348	7.44641	7.57703	7.42875	7.43417	7.3658	7.26389	7.39649	7.36184	7.28892	7.4385	7.4972
1416945_at	7.90918	8.0388	8.04179	8.14384	8.02086	7.98063	8.13714	8.03914	8.04179	8.06548	8.07187	8.19791	8.20767	8.05866	7.9652	8.04179	8.11634
1416946_a_at	8.39531	8.48694	8.32195	8.37039	8.26068	8.51766	8.47599	8.14925	8.33013	8.42213	8.21001	8.15911	8.28938	8.29264	8.52473	8.09638	8.26628
1416947_s_at	9.03778	9.15047	8.96905	9.06082	8.84943	9.0765	9.01042	8.7573	8.87302	9.07083	8.78069	9.01976	9.02698	8.8506	8.97553	8.90251	8.9014
1416948_at	10.064	10.0635	10.1665	10.2108	10.3602	10.2171	10.1623	10.2232	10.2856	10.1539	10.0329	10.1876	10.1832	10.1626	10.0976	10.1739	10.1276
1416949_s_at	9.09709	9.11751	9.20143	9.14772	9.1645	9.27191	9.33608	8.99254	9.13334	9.15233	8.9666	9.11886	9.06792	9.19306	9.18463	9.13334	9.06572
1416950_at	6.32889	6.46798	6.47989	6.85983	6.53397	6.7472	6.53397	6.53397	6.63514	6.51436	6.05069	6.6593	6.54894	6.79271	6.56691	6.05747	6.58231
1416951_a_at	12.44	12.3143	12.5868	12.5226	12.5732	12.5266	12.565	12.5771	12.579	12.4931	12.3241	12.3149	12.521	12.2867	12.5196	12.4725	12.5669
1416952_at	11.9514	11.8518	11.9932	12.0265	11.97	12.0029	12.0104	11.9319	11.9814	11.9896	11.8462	11.9759	12.0677	11.8581	12.0473	11.9596	12.0332
1416953_at	8.08993	7.9618	7.39002	8.43372	7.79676	8.49752	7.23355	8.30983	8.03062	8.02165	7.87053	8.09211	7.97557	8.21807	7.74522	7.93387	8.35892
1416954_at	7.59609	7.79519	7.75011	7.73761	7.71733	7.79355	7.6213	7.70934	7.72445	7.6116	7.72633	7.81064	7.70895	7.71733	7.6871	7.80532	7.63466
1416955_at	6.97022	7.05667	7.16526	6.94242	7.12045	7.13595	7.095	7.095	7.12903	6.99837	7.17364	7.14698	6.9101	6.94409	7.10665	7.23188	7.14957
1416956_at	11.8276	11.9102	11.9132	11.8122	11.7991	11.7136	11.8366	11.6662	11.745	11.9192	11.7535	11.7789	11.8308	11.5978	11.8228	11.9297	11.7821
1416957_at	3.4275	3.38568	3.57066	3.39532	3.6614	3.43453	3.70087	3.40271	3.51902	3.45002	3.62447	3.54954	3.49909	3.47661	3.49909	3.80112	3.50348
1416958_at	11.2197	11.1975	11.309	11.3733	11.2957	11.3286	11.2651	11.2555	11.3128	11.1627	10.9151	11.2111	11.2618	11.1105	11.319	11.2651	11.3276
1416959_at	8.09005	8.03578	8.3428	7.95785	8.11362	8.18543	8.10416	8.09656	8.10927	8.14278	7.91056	8.12893	8.32575	7.97838	8.13139	8.22847	8.37236
1416960_at	9.78001	9.88132	9.82405	9.84698	9.93661	10.0131	9.98411	9.58524	9.84781	9.89773	9.83556	9.9831	9.95482	9.87826	10.048	9.83068	9.75927
1416961_at	5.58209	5.98371	5.82303	5.64628	5.68491	5.7012	5.61631	5.64635	5.90024	5.78418	5.84122	6.10389	5.61546	5.6673	5.76868	5.993	5.64953
1416962_at	7.39216	7.29423	7.26683	7.34737	7.39028	7.44811	7.3513	7.25838	7.38174	7.39351	7.47575	7.33947	7.37914	7.53865	7.12012	7.48136	7.27994
1416963_at	9.93502	9.90015	9.85209	9.99296	9.97153	9.91546	9.96177	9.93246	9.88642	10.014	9.87123	10.0575	9.95352	10.0556	9.90778	9.92024	9.96781
1416964_at	8.36559	8.39005	8.23813	8.44889	8.15422	8.34898	8.3654	8.24473	8.27839	8.20968	8.23469	8.24648	8.34234	8.03321	8.20165	8.13466	8.11743
1416965_at	12.0535	12.0324	11.8914	11.9143	11.9364	12.0048	12.018	11.8937	11.806	12.0821	11.964	11.998	11.9865	11.6363	11.806	11.9261	11.7112
1416966_at	7.98003	8.08111	7.52919	8.01099	7.80215	8.51102	7.63389	8.2065	8.52139	7.69354	7.85055	7.88844	7.59377	8.09026	7.9381	8.07164	7.95092
1416967_at	9.28456	9.38172	9.2445	9.57722	9.05139	9.41042	9.48055	9.36167	9.20569	8.85781	8.74319	9.09682	8.93147	9.00792	9.19059	8.9874	9.41889
1416968_a_at	7.21879	7.30017	7.22377	7.29131	7.10468	7.27698	7.22924	7.3286	7.55757	7.25998	7.41278	7.4527	7.21024	7.31509	7.25433	7.2733	7.36171
1416969_at	6.21279	6.31618	6.35081	6.21552	6.63717	6.33203	6.23739	6.40111	6.48835	6.18302	6.47382	6.5164	6.4166	6.39301	6.21681	6.42566	6.46781
1416970_a_at	13.1096	13.0607	13.1335	13.21	13.2495	13.2136	13.2252	13.1708	13.1619	13.1253	12.9346	13.1289	13.2258	13.1131	13.2689	13.1803	13.2263
1416971_at	12.2364	12.2532	12.4064	12.4138	12.5116	12.4312	12.3829	12.4928	12.5052	12.3514	12.2925	12.4356	12.4537	12.4851	12.4232	12.4661	12.452
1416972_at	11.4057	11.4552	11.4949	11.452	11.542	11.483	11.4976	11.5598	11.6002	11.5136	11.3868	11.5852	11.6509	11.5952	11.493	11.5933	11.5737
1416973_at	10.8655	10.9419	11.009	10.9295	11.0953	11.0946	11.0319	11.0776	11.1971	11.0213	10.9658	11.1002	11.0285	11.0912	10.976	10.9999	11.0405
1416974_at	7.83972	7.87226	7.91986	7.82532	7.97764	7.91525	7.8685	7.84462	7.85566	7.92734	7.89256	8.13167	7.95052	7.85145	8.00884	8.02519	7.8067
1416975_at	6.83915	6.86762	6.85923	6.89848	7.00322	7.05593	6.84111	6.90957	6.86762	6.91224	6.82907	6.94193	6.79769	6.88082	6.82721	6.78756	6.97477
1416976_at	7.58989	7.82106	7.73181	7.75106	7.62811	7.82561	7.72723	7.74527	7.79658	7.76993	7.65965	7.73313	7.85205	7.80346	7.74128	7.79971	7.87979
1416977_at	4.80222	4.67546	4.64607	4.72144	4.78792	4.51849	4.57517	4.61189	4.56037	4.99031	4.57995	4.66575	4.82093	4.85055	4.67546	4.67546	4.52342
1416978_at	8.17812	7.96222	8.03756	8.32213	8.04503	8.44154	8.18215	8.32901	8.62861	8.09894	8.15868	8.18802	7.98369	8.24325	8.17479	8.18358	8.18215
1416979_at	11.5999	11.61	11.6609	11.6377	11.7778	11.6713	11.6609	11.7657	11.8009	11.6526	11.5814	11.7445	11.69	11.7334	11.5744	11.6403	11.6609
1416980_at	4.99099	5.62128	5.38127	5.39208	5.54474	5.3726	5.26509	5.40831	5.59769	5.44655	5.31824	5.71981	5.42249	5.29663	5.4201	5.55948	5.4516
1416981_at	9.16176	9.06772	8.77832	8.96247	8.65285	8.75247	8.83047	8.89162	8.76379	8.83793	8.73377	8.90228	8.53133	8.55904	8.54207	8.71195	8.57932
1416982_at	8.83414	8.9843	8.76072	8.7249	8.61542	8.71607	8.71577	8.82004	8.70233	8.68336	8.67146	8.70233	8.76024	8.25386	8.67341	8.66522	8.48497
1416983_s_at	9.94878	9.82076	9.6891	9.75859	9.51098	9.59095	9.7747	9.73976	9.59095	9.6152	9.51735	9.41877	9.46508	9.30016	9.34947	9.48997	9.47395
1416984_at	10.2053	9.99919	10.1189	10.252	10.2577	10.2398	10.2038	10.1047	10.1396	10.1058	9.94691	10.1724	10.1939	10.0427	10.1498	10.215	10.1353
1416985_at	11.3335	11.2738	11.2775	11.3756	11.1666	11.211	11.3258	11.0816	11.0432	11.3454	11.1353	11.1786	11.2998	10.9219	11.2194	11.2375	11.2578
1416986_a_at	9.06096	9.11582	9.09575	8.90473	9.1426	9.06458	9.06886	8.864	8.9671	9.13006	9.022	9.1508	9.10767	8.74593	9.05595	9.12567	8.89185
1416987_at	4.19991	4.10187	4.09025	4.08727	4.31002	4.31938	4.32304	3.86113	4.24059	4.09623	3.70525	4.13309	4.26821	3.98018	4.06784	3.9367	4.13195
1416988_at	8.80665	8.8019	8.72899	8.83615	8.62296	8.78285	8.64357	8.80209	8.68759	8.68241	8.71305	8.74064	8.84976	8.82392	8.5257	8.62856	8.6707
1416989_at	10.4564	10.4697	10.4126	10.4741	10.3309	10.3299	10.3284	10.2796	10.4113	10.5429	10.4382	10.3808	10.3699	10.2579	10.3374	10.2873	10.3985
1416990_at	9.71874	9.55222	9.64904	9.72314	9.54562	9.61853	9.70172	9.67827	9.49295	9.89306	9.61784	9.7371	9.65016	9.54491	9.64802	9.6799	9.64802
1416991_at	9.03771	8.85178	8.79064	8.94573	8.78171	8.83722	8.83139	8.97749	8.81497	8.96325	8.79794	8.83709	8.9117	8.84941	8.73981	8.76336	8.80898
1416992_at	6.67765	6.70675	6.66727	6.58528	6.74831	6.74915	6.74874	6.67765	6.68289	6.62253	6.73627	6.54598	6.61052	6.67765	6.51051	6.66881	6.62102
1416993_at	8.59141	8.58312	8.70836	8.78546	8.71934	8.66333	8.73696	8.70169	8.78511	8.76941	8.72352	8.83823	8.86903	8.97628	8.672	8.80627	8.78191
1416994_at	8.37693	8.25712	8.50015	8.46861	8.56794	8.42797	8.50015	8.50015	8.5595	8.49455	8.53091	8.48314	8.59609	8.41765	8.50948	8.51418	8.50271
1416995_at	7.53487	7.61959	7.53309	7.51617	7.68181	7.56167	7.56167	7.58855	7.47197	7.52384	7.42757	7.78136	7.65548	7.55227	7.57453	7.55044	7.49424
1416996_at	7.56752	7.32558	7.12914	7.47643	7.25894	7.51498	7.38019	7.22843	7.17979	7.33864	6.91354	7.28231	7.19576	7.28231	7.02458	7.19057	7.32948
1416997_a_at	9.7545	9.82002	9.67287	9.69922	9.46651	9.57682	9.54396	9.516	9.37005	9.4698	9.48042	9.59915	9.68437	9.47559	9.58279	9.47419	9.51082
1416998_at	9.37464	9.43055	9.36591	9.43511	9.24271	9.35412	9.31483	9.23318	9.27008	9.43574	9.2491	9.3333	9.42583	9.3336	9.28766	9.3014	9.29475
1416999_at	8.35892	8.22079	8.18821	8.30467	8.34262	8.34225	8.42352	8.32306	8.40673	8.40274	8.24192	8.33494	8.32776	8.43986	8.34542	8.49923	8.21877
1417000_at	8.24407	8.29149	8.29149	8.4339	8.42216	8.29149	8.34085	8.43886	8.33475	8.32162	8.25213	8.29149	8.19753	8.11444	8.26867	8.29149	8.18265
1417001_a_at	10.7473	10.7044	10.553	10.9001	10.4674	10.4973	10.4882	10.6327	10.3223	10.8864	10.6564	10.5613	10.6716	10.3984	10.8101	10.6033	10.6444
1417002_at	11.0323	10.9438	10.971	11.0571	11.1243	11.0807	11.1269	11.0373	11.103	11.0458	10.9313	11.1283	11.0302	11.0367	11.0676	11.0154	11.0205
1417003_at	6.60716	6.44916	6.47118	6.57101	6.49549	6.42767	6.5358	6.30767	6.3908	6.67426	6.45189	6.87738	6.51063	6.89228	6.71412	6.67144	6.69312
1417004_at	10.1619	10.094	10.3041	10.2824	10.2309	10.234	10.2921	10.2077	10.3517	10.221	10.1628	10.2004	10.2324	10.1863	10.182	10.134	10.3114
1417005_at	12.7748	12.7825	12.8078	12.8376	12.7464	12.7857	12.7203	12.7175	12.6956	12.8146	12.7294	12.7455	12.7798	12.5548	12.6735	12.7016	12.714
1417006_at	9.34248	9.17085	9.25952	9.34881	9.38494	9.24685	9.24638	9.46391	9.41602	9.28543	9.20948	9.37759	9.39262	9.2916	9.23092	9.23955	9.26569
1417007_a_at	10.0012	10.043	10.1164	10.1649	9.98165	10.0684	10.104	10.2692	10.1944	10.043	9.88265	10.0221	9.99801	9.86667	10.0719	10.0684	10.1137
1417008_at	8.21559	8.02033	7.87327	8.33985	7.94399	8.05312	7.95474	7.95718	7.94399	7.81286	7.84739	7.94399	7.89135	7.87236	7.74601	7.83147	7.95396
1417009_at	5.30921	5.32218	5.16454	4.96674	4.97212	5.26832	5.1759	4.89011	5.26448	5.16454	5.04774	5.1297	4.92646	5.06029	5.11541	5.23505	5.12698
1417010_at	12.8745	12.8543	13.0488	12.8745	12.794	12.884	12.9126	12.9103	12.8909	12.8449	12.621	12.78	12.8806	12.7085	12.9652	12.8745	12.8938
1417011_at	8.84567	8.95057	8.75698	8.98315	8.97421	8.99657	8.75642	8.82604	8.84538	8.79983	8.49843	8.85141	8.72958	8.89326	8.84567	8.64205	8.99297
1417012_at	7.65066	7.33862	7.39936	7.54508	7.51073	7.62404	7.57773	7.56748	7.41262	7.51073	7.09494	7.45155	7.52046	7.3613	7.48041	7.55745	7.51512
1417013_at	7.72788	7.82807	7.96025	7.93556	7.90059	7.89774	7.87029	7.83167	8.00613	8.11425	7.93731	7.93444	8.04738	8.20724	7.85903	8.20091	7.99018
1417014_at	7.12598	7.27134	7.32512	7.20992	7.45732	7.25442	7.34778	7.46969	7.53167	7.51132	7.41402	7.63352	7.39414	7.61896	7.39414	7.56264	7.38734
1417015_at	5.10629	5.27571	5.39226	4.91111	5.5066	5.39748	5.5937	5.40347	5.44295	5.23384	5.43805	5.67353	5.14345	5.63464	5.39226	5.14396	5.51451
1417016_at	8.2803	8.51726	8.36754	8.57371	8.31296	8.36937	8.31325	8.12922	8.01484	8.43855	8.06769	8.18379	8.41098	8.21369	8.38105	8.34591	8.17134
1417017_at	5.52723	5.84895	5.8104	5.72469	5.76848	5.85674	5.67935	5.85785	6.00833	5.4745	5.97579	6.14037	5.85674	5.93559	5.76848	5.94791	5.95369
1417018_at	7.53658	7.62472	7.66102	7.65358	7.61396	7.95051	7.55485	7.65833	7.77388	7.4721	7.49662	7.69908	7.44904	7.59113	7.49835	7.52353	7.57013
1417019_a_at	4.11497	3.7905	4.1441	4.29474	4.16895	4.38696	4.02645	4.09373	4.11232	4.03324	4.01019	4.21522	4.19913	4.10357	4.08098	4.19814	4.15135
1417020_at	4.93464	4.81169	4.70522	4.67777	4.94064	4.90455	4.70237	4.74376	4.97933	4.80235	5.03034	5.02962	4.71914	5.03709	4.7579	4.84761	4.9822
1417021_a_at	4.41873	4.44997	4.61876	4.64333	4.74297	4.82648	4.60678	4.6404	4.82477	4.76029	5.00133	4.78254	4.49572	4.47796	4.61677	4.73873	4.54344
1417022_at	7.5342	7.53484	7.23857	7.76583	7.39471	7.48723	7.43947	7.52748	7.4928	7.34593	7.12635	7.54603	7.50979	7.51992	7.26584	7.12966	7.62874
1417023_a_at	3.93558	3.81899	3.97899	4.0768	3.77592	3.85562	3.91057	3.73991	3.85555	3.73262	3.649	3.77314	3.77393	3.9969	3.9244	3.874	3.74728
1417024_at	9.06677	9.12578	9.02326	9.07023	8.96701	9.06335	9.12871	8.83842	9.00528	8.90752	8.80453	8.94423	8.99015	8.99596	9.09137	8.94326	8.91386
1417025_at	5.71006	6.036	6.19715	6.2389	6.17662	6.38158	6.20012	6.17893	6.56976	6.09079	5.97741	6.48984	5.80864	6.33473	6.24248	6.24497	6.07479
1417026_at	9.39524	9.41534	9.63474	9.73594	9.69419	9.78642	9.90705	9.74904	9.65843	9.68561	9.33913	9.63281	9.8057	9.59664	9.95819	9.64998	9.58908
1417027_at	12.7632	12.6231	12.6552	12.6675	12.6785	12.5354	12.7591	12.5118	12.5177	12.6231	12.5589	12.5031	12.6454	12.5284	12.734	12.6048	12.6447
1417028_a_at	12.1652	12.1299	12.0621	11.9691	11.9797	11.8533	12.0649	11.7901	11.7903	12.1592	11.9663	11.9197	12.0993	11.7113	12.041	12.0066	11.9891
1417029_a_at	9.98215	9.91371	10.042	9.84233	10.0286	9.84897	9.99578	9.82928	9.79967	10.1051	9.75992	9.86754	9.99909	9.51741	10.0706	10.0351	9.84919
1417030_at	5.2812	4.90998	5.25939	5.30827	4.97037	5.19202	5.16043	5.10801	5.03767	5.16017	4.88192	4.99043	5.24443	4.73105	5.25347	5.32555	5.27808
1417031_at	5.56237	5.82512	5.73673	5.76596	5.53152	5.74238	5.58942	5.69471	5.65211	5.7191	5.31945	5.7243	5.43314	5.72347	5.80149	5.59094	5.59381
1417032_at	9.65857	9.56069	9.71344	9.66436	9.74911	9.60547	9.7663	9.6523	9.76608	9.84436	9.92062	9.72049	9.88352	9.84917	9.74446	9.9187	9.7779
1417033_at	7.71828	7.46678	8.11166	7.77834	8.19339	8.04763	8.12429	8.12797	8.18039	8.26137	8.24795	8.2617	8.25716	8.18116	7.93082	8.19946	7.96002
1417034_at	7.69933	7.5794	7.77144	7.61708	7.79567	7.73083	7.75696	7.70226	7.8057	7.69933	7.83253	7.48679	7.80363	7.69933	7.55695	7.72514	7.52329
1417035_at	8.15725	8.27609	8.1979	8.26006	8.23882	8.28262	8.16483	8.16383	8.1979	8.30922	8.14234	8.42197	8.1398	8.18476	8.1222	8.17439	8.19986
1417036_at	3.87264	3.91825	3.84871	3.83486	3.87264	3.89376	3.88156	3.94915	3.83944	3.8854	3.90529	4.11639	3.86285	3.95422	3.93948	3.60428	3.77491
1417037_at	8.33104	8.22737	8.29213	8.50618	8.35618	8.35438	8.35022	8.29389	8.22635	8.37843	8.20894	8.15983	8.46283	8.17877	8.25421	8.0979	8.30895
1417038_at	9.71787	9.6836	9.56052	9.55559	9.36425	9.49763	9.6396	9.47805	9.58414	9.61201	9.54147	9.55856	9.53371	9.44075	9.23685	9.46583	9.49318
1417039_a_at	8.40095	8.45521	8.46683	8.5517	8.44224	8.51583	8.37046	8.48479	8.48234	8.4748	8.49994	8.49409	8.54605	8.44049	8.11693	8.40687	8.4121
1417040_a_at	10.017	10.0491	10.0956	10.0953	10.161	10.2041	10.0953	10.0822	10.0638	10.154	10.1448	10.0824	10.1857	10.0425	10.0953	10.1756	9.94329
1417041_at	8.14099	8.40947	8.39287	8.41566	8.51037	8.49874	8.56649	8.48177	8.51912	8.40037	8.34476	8.22122	8.46299	8.46189	8.23482	8.37062	8.38264
1417042_at	8.65057	8.71199	8.57507	8.57957	8.61166	8.65911	8.5695	8.60939	8.67947	8.77418	8.64752	8.77018	8.61486	8.81558	8.59987	8.84037	8.65911
1417043_at	8.72457	8.83773	8.74246	8.80355	8.90508	8.89186	8.94459	8.76032	8.87005	8.98338	8.89076	8.958	8.92915	8.87005	8.94691	8.85254	8.85454
1417044_at	10.7193	10.7822	10.7131	10.7679	10.7483	10.7424	10.6788	10.5792	10.6801	10.8002	10.6739	10.7255	10.8576	10.66	10.7257	10.6976	10.6454
1417045_at	7.64371	7.6694	7.73123	7.51719	7.6036	7.68718	7.76991	7.44778	7.60988	7.8777	7.73123	7.93852	7.88353	7.67346	7.75479	7.80238	7.75927
1417046_at	9.40543	9.24977	9.26269	9.34029	9.33424	9.39	9.29019	9.28002	9.33133	9.39889	9.27121	9.41726	9.35837	9.29009	9.37483	9.33076	9.34631
1417047_at	4.1035	4.50205	4.18683	4.08608	4.37436	4.30594	4.28845	4.3585	4.38696	4.34995	4.18787	4.38468	4.23671	4.27024	4.4525	4.1173	4.29017
1417048_at	5.21148	5.21951	5.31252	5.24517	5.67598	5.41049	5.42665	5.09002	5.54167	5.24828	5.64261	5.55259	5.23002	5.44919	5.46607	5.56035	5.42145
1417049_at	6.00272	6.05377	6.08034	5.96981	6.08864	6.06874	6.21932	6.02672	6.04295	6.16661	6.31096	6.37905	6.3179	6.14651	6.19715	6.2334	6.06521
1417050_at	10.927	11.0269	10.8656	10.9403	10.7931	10.8477	10.9602	10.714	10.7869	10.9164	10.6579	10.7223	10.6139	10.5386	10.7914	10.701	10.6435
1417051_at	10.8239	10.863	10.7442	10.7161	10.3972	10.467	10.8281	10.7195	10.5768	10.6274	10.6038	10.4615	10.5644	10.1074	10.7779	10.605	10.6661
1417052_at	10.1515	10.0408	10.2749	10.2192	10.4505	10.4414	10.3502	10.4059	10.4997	10.1963	10.242	10.2886	10.3899	10.2298	10.1686	10.3181	10.1901
1417053_at	9.90847	9.76308	9.99287	9.91808	10.0467	10.0476	10.1033	10.1325	10.2344	10.0651	9.94882	10.2798	10.193	10.1721	9.90851	10.0266	9.99173
1417054_a_at	10.4212	10.3431	10.4522	10.551	10.6118	10.5093	10.4639	10.6852	10.5765	10.4141	10.4186	10.5659	10.6099	10.6166	10.5024	10.463	10.5207
1417055_at	10.7343	10.6286	10.8492	10.9077	10.7591	10.8643	10.8852	11.0005	10.9713	10.7624	10.6324	10.8856	10.9763	10.846	10.8051	10.7673	10.895
1417056_at	9.78986	9.80376	9.69101	9.87494	9.86945	9.95787	9.8797	9.9121	9.90967	9.76798	9.71043	9.72877	9.85707	9.67639	9.8224	9.75365	9.69953
1417057_a_at	10.2917	10.3112	10.3139	10.6249	10.1155	10.4038	10.3804	10.1104	10.1729	10.4997	10.0204	10.3112	10.3452	10.1952	10.4751	10.225	10.4417
1417058_a_at	9.26736	9.18203	9.23154	9.34273	9.18975	9.28813	9.35227	9.40703	9.32505	9.20158	9.22846	9.10707	9.28842	9.34336	9.28067	9.15845	9.34752
1417059_at	10.2037	10.28	10.2566	10.3707	10.447	10.4122	10.3586	10.3381	10.3777	10.2281	10.2846	10.3393	10.3525	10.4791	10.3626	10.3302	10.3249
1417060_at	9.42488	9.30368	9.32461	9.39372	9.20008	9.4025	9.34138	9.3062	9.29275	9.36638	9.20956	9.47518	9.52648	9.35412	9.38828	9.37546	9.49438
1417061_at	7.52579	7.33363	7.13947	7.61699	7.37573	7.67003	7.58767	7.73464	7.55759	7.04385	7.27835	7.1694	7.43196	7.26647	7.23548	6.92299	7.35106
1417062_at	7.7388	7.8607	7.77054	7.71892	7.69674	7.70645	7.77033	7.61793	7.65393	7.77412	7.73212	7.41431	8.00069	7.6842	7.65228	7.62514	7.56293
1417063_at	9.52828	9.55442	9.72103	9.58678	9.88677	9.77704	9.77961	9.71253	9.92914	9.77499	9.66079	9.77254	9.76461	9.79304	9.74328	9.85524	9.82161
1417064_at	9.7335	9.69075	9.68813	9.77736	9.76568	9.74753	9.71185	9.77736	9.7239	9.92847	9.69048	9.87081	9.90659	9.76707	9.92954	9.81557	9.816
1417065_at	11.4854	11.3659	11.2102	11.3872	11.0532	11.2399	11.3071	11.1788	11.1139	11.4124	11.6348	11.2266	11.1738	11.0903	11.2723	11.4305	11.6391
1417066_at	9.08626	9.01345	9.05562	9.02413	8.96088	8.93784	9.10271	8.98438	9.03675	9.01345	9.02493	8.99803	9.0751	8.94646	8.97581	9.00555	8.94164
1417067_s_at	5.63596	5.36445	5.37234	5.42074	5.43004	5.37366	5.44313	6.00955	5.44231	5.45685	5.43004	5.44806	5.51523	5.25775	5.54262	5.25164	5.41354
1417068_a_at	9.42389	9.6188	9.60358	9.49348	9.48435	9.51014	9.466	9.58145	9.63047	9.6095	9.57234	9.6497	9.6327	9.56765	9.54437	9.68702	9.55694
1417069_a_at	9.60235	9.54375	9.88484	9.62897	9.77479	9.71436	9.7204	9.70903	9.62885	9.85405	9.48015	9.82578	9.71214	9.51811	10.0178	9.79467	9.92121
1417070_at	5.7979	5.72033	5.86663	6.06287	5.84994	5.87191	5.72364	5.69673	5.90319	5.56483	5.41571	5.83809	5.39452	5.86654	5.58175	5.59036	5.91173
1417071_s_at	7.50121	7.16397	7.33883	7.39743	7.35986	7.37869	7.44162	7.4058	7.55905	7.24035	7.35666	7.23969	7.11211	7.45099	7.24375	7.30167	7.35666
1417072_at	6.60699	6.65817	6.29901	6.91987	6.78663	7.33255	6.43371	7.55585	7.74846	6.69922	6.68225	6.99088	6.41444	6.98267	6.6535	6.86266	6.75978
1417073_a_at	11.0028	11.0513	11.2128	11.1542	10.9517	11.1104	11.0223	11.1397	11.0255	11.0384	10.805	11.0338	11.0356	10.7776	11.1679	11.0216	11.2541
1417074_at	3.77039	3.88628	3.90407	3.74847	4.0738	3.95084	3.87219	3.90407	4.18997	3.72785	3.91102	3.90407	3.86285	4.09245	3.76499	3.91835	3.90407
1417075_at	9.43601	9.27939	9.43601	9.45258	9.50402	9.42589	9.43062	9.34529	9.36218	9.45247	9.21461	9.5018	9.57743	9.50747	9.56658	9.37495	9.43265
1417076_at	3.79027	4.08471	4.1902	4.1902	4.14389	4.26573	4.09141	4.24178	4.15869	4.11786	4.28975	4.22336	4.26821	4.52747	4.06817	4.02073	4.21048
1417077_at	10.0171	9.89475	9.97278	10.0394	9.98476	9.99841	10.0179	9.93354	9.95666	9.97174	9.65161	9.89386	9.89577	9.9094	9.81286	9.88433	9.91006
1417078_at	6.22342	6.27414	6.21215	6.22548	6.16796	6.13173	6.25704	6.21505	6.50104	6.01591	6.32851	6.26011	6.22191	6.42866	6.22191	6.22191	6.3076
1417079_s_at	4.88313	5.06044	5.13021	4.9981	5.22306	5.04044	5.13361	5.02329	5.45641	4.88198	5.06044	5.40088	4.88677	5.24623	4.96496	5.07485	5.02141
1417080_a_at	8.85256	8.80757	8.74068	8.87909	8.8022	8.86803	8.76496	8.63851	8.71066	8.74365	8.64012	8.7797	8.68368	8.70832	8.7442	8.63155	8.58004
1417081_a_at	7.24378	7.27539	7.22831	7.2913	7.06626	7.35314	7.15409	7.4276	7.3715	7.00702	7.17832	7.1532	7.13346	7.22088	6.97015	6.96727	7.1174
1417082_at	10.3199	10.2494	10.1501	10.2759	10.0448	10.1868	10.2104	10.1897	10.0637	10.2289	10.1055	10.1807	10.2334	9.93926	10.3038	10.1035	10.1952
1417083_at	10.2799	10.153	10.2543	10.2937	10.3836	10.3365	10.2776	10.2771	10.3279	10.1206	10.1253	10.2841	10.3	10.3025	10.2309	10.2776	10.2931
1417084_at	6.99164	7.09516	7.22473	7.004	7.10747	7.04092	7.1349	7.10808	6.91859	7.18387	7.27376	7.07607	7.09138	6.9694	7.33782	7.13593	7.37297
1417085_at	4.40081	4.26634	4.35898	4.40081	4.49718	4.39062	4.43309	4.48167	4.6278	4.52958	4.36995	4.62697	4.08627	4.40081	4.18263	4.30133	4.37717
1417086_at	10.682	11.219	10.7857	11.0015	10.2339	10.5241	10.9575	10.3138	10.682	10.7413	10.0149	10.5337	10.3579	10.9635	11.0325	10.0342	10.9308
1417087_at	10.9576	10.8548	10.8122	10.8299	10.6307	10.5412	10.8646	10.606	10.5758	10.8891	10.8052	10.65	10.6085	10.3605	10.6485	10.6914	10.6478
1417088_at	9.03407	9.18848	9.23645	9.2926	9.23521	9.13993	9.20396	9.23964	9.18316	9.1944	9.19062	9.25687	9.18127	9.04546	9.12243	9.19687	9.10337
1417089_a_at	10.4793	10.5827	10.4818	10.5744	10.4457	10.649	10.568	10.3711	10.4764	10.5866	10.1879	10.5391	10.5424	10.3869	10.6673	10.4657	10.6748
1417090_at	7.55515	7.60403	7.58276	7.77712	7.52724	7.69796	7.64821	7.42958	7.65616	7.50797	7.21536	7.56746	7.65988	7.42985	7.64742	7.43914	7.56484
1417091_at	8.25012	8.17413	8.10744	8.30305	8.03708	8.01702	8.05764	8.00295	7.90207	8.40681	8.07895	8.04744	8.17236	8.09688	8.02012	8.0779	8.13024
1417092_at	6.70995	6.61327	6.50971	6.69639	6.50971	6.99097	6.60978	6.77839	6.3697	6.583	6.20794	6.4514	6.44916	6.43719	6.3449	6.22872	6.38572
1417093_a_at	6.87343	6.87479	6.95302	7.05855	6.91218	6.93594	6.99404	7.1059	6.92545	7.08119	6.90229	6.95302	7.13846	6.95302	6.86296	6.94615	6.93781
1417094_at	12.2751	12.2419	12.1056	12.1752	12.0837	12.202	12.1824	12.142	12.2472	12.2753	12.1	12.2487	12.1419	12.0012	12.102	12.1009	12.2124
1417095_a_at	5.02455	4.9457	5.06568	4.99145	4.78749	4.99035	5.06406	5.16063	5.0341	4.97701	4.76925	4.71691	4.95759	4.93267	4.94745	4.99286	4.91631
1417096_at	7.22267	7.43657	7.36235	7.40812	7.33947	7.39338	7.289	7.41064	7.3638	7.33947	7.35682	7.33947	7.23296	7.37864	7.2318	7.18018	7.27835
1417097_at	6.81643	6.79084	6.80296	6.90426	6.81642	7.05649	6.58039	6.81642	6.78582	6.87591	6.90319	6.87555	6.89099	6.64029	6.86379	6.76845	6.68313
1417098_s_at	7.47274	7.36514	7.32598	7.32948	7.16896	7.48656	7.40196	7.42814	7.29172	7.46754	7.33373	7.32948	7.44761	7.05068	7.19521	7.21477	7.13995
1417099_at	9.14121	9.12489	9.09775	9.20143	9.15828	9.21827	9.21634	9.10964	9.12275	9.15828	9.05714	9.2357	9.10302	9.12896	9.24394	9.11979	9.2037
1417100_at	7.89035	7.89754	8.13179	7.83299	7.94398	8.11914	7.94048	8.13176	8.05492	7.8427	7.99258	7.91829	8.18024	8.13883	7.80253	8.02686	8.0577
1417101_at	9.28631	9.38602	9.3627	9.33385	9.21808	9.10881	9.55954	9.22635	9.39354	9.35332	9.25652	9.18363	9.1415	8.87212	9.36218	9.28768	9.16782
1417102_a_at	10.7012	10.811	11.1138	11.0027	10.915	11.022	10.9498	10.9854	10.9994	10.9179	10.4964	10.7885	10.8724	10.9005	11.0456	10.9366	11.0152
1417103_at	9.95249	10.0303	10.0406	10.0406	10.0418	10.0864	10.0414	10.1087	10.0673	10.014	9.98677	10.0816	10.1229	10.0596	9.89587	10.0582	10.0225
1417104_at	5.3986	5.657	5.34494	5.77368	5.84707	6.17042	5.60912	6.14917	6.57811	5.38721	5.76596	6.02984	5.72962	6.26508	5.52332	5.74545	5.70816
1417105_at	10.981	10.9423	11.1293	11.1807	11.1936	11.1495	11.1222	11.2412	11.2635	11.0749	10.9654	11.1499	11.1956	11.0607	11.0042	11.164	11.084
1417106_at	8.89206	8.87945	8.93339	8.99173	9.0128	9.02381	9.09627	9.0144	9.02779	9.09067	9.06294	9.08745	9.17967	9.15283	9.27351	9.13311	9.17802
1417107_at	7.8477	7.76127	7.7438	7.86767	7.89147	7.85577	7.88497	7.68373	7.87463	7.77412	7.7334	7.67023	7.97923	7.92867	7.82642	7.74015	7.74247
1417108_at	8.30292	8.29587	8.30942	8.26414	8.31019	8.31854	8.30398	8.30079	8.31536	8.44719	8.3877	8.52398	8.38945	8.54809	8.22946	8.35549	8.37142
1417109_at	7.29727	7.05397	7.36604	7.52757	7.60734	7.65851	7.41989	7.62462	7.63293	7.4901	7.59508	7.79176	7.76347	7.87929	7.43908	7.80395	7.57705
1417110_at	8.7985	8.813	8.67864	8.60726	8.57914	8.70358	8.86171	8.58615	8.64052	8.73428	8.40319	8.47866	8.53784	8.44444	8.70858	8.60587	8.81268
1417111_at	10.6013	10.473	10.5666	10.5786	10.4523	10.5605	10.7907	10.4261	10.465	10.465	10.2104	10.4245	10.3917	10.207	10.485	10.4255	10.4709
1417112_at	11.0722	11.1135	11.1039	11.2537	11.067	11.153	11.2016	11.056	11.0586	11.1225	11.0929	11.1996	11.0915	11.1451	10.9252	11.0059	11.0606
1417113_at	8.88672	8.76406	8.76234	8.80911	8.65153	8.80911	8.86906	8.86229	8.67317	8.83926	8.88957	8.78796	8.84321	8.78396	8.7071	8.8498	8.82474
1417114_at	8.88218	8.83575	8.78342	8.85009	8.8647	8.80754	8.85743	8.67843	8.69132	8.7762	8.68021	8.70201	8.78188	8.65885	8.69826	8.62926	8.78642
1417115_at	10.1939	10.0775	9.94468	10.057	10.0083	9.99978	9.93237	9.9777	9.89346	9.93102	9.98628	10.0323	10.0675	9.74241	9.84266	10.0401	10.0121
1417116_at	9.9909	10.0717	9.86758	10.0347	9.92048	9.92063	9.96225	9.81399	9.7241	9.94216	9.82525	9.86367	9.78472	9.71353	9.87012	9.82213	9.88089
1417117_at	6.75072	6.50397	6.44079	6.46108	6.39992	6.53959	6.53672	6.30767	6.5112	6.81881	6.5109	6.53672	6.85957	6.70621	6.59166	6.53672	6.53672
1417118_a_at	8.9369	8.88991	8.99661	9.02012	9.07026	9.0525	9.12239	9.05031	9.05209	9.0392	9.00948	9.08325	9.02296	8.93586	9.08135	8.95291	8.90906
1417119_at	8.10482	8.04105	8.06806	8.09205	7.9277	7.99821	8.1272	8.02426	8.03777	8.07247	7.99078	8.11682	8.04744	7.89077	7.97198	7.9235	7.78783
1417120_at	7.39089	7.42604	7.11026	7.26584	7.41105	7.22487	7.28677	7.14639	7.22661	7.28664	7.41639	7.19778	7.34505	7.3264	7.22177	7.20814	6.93617
1417121_at	3.88422	3.96691	3.94343	4.1066	4.16105	4.12885	3.94066	3.99451	4.10368	3.76611	4.06842	4.08047	3.89956	3.85612	4.19893	4.04684	3.9908
1417122_at	6.39763	6.39155	6.49313	6.39763	6.39763	6.55228	6.47277	6.4947	6.32584	6.40727	6.31159	6.03049	6.57599	6.33235	6.40303	6.34471	6.3642
1417123_at	6.26063	6.37961	6.58853	6.31159	6.60305	6.4945	6.45851	6.09726	6.10309	6.4282	6.28245	6.31061	6.42498	6.37961	6.4282	6.46943	6.35036
1417124_at	11.6461	11.6384	11.8307	11.7826	11.7436	11.7998	11.726	11.7478	11.8484	11.7362	11.5275	11.7061	11.7436	11.6463	11.7018	11.7436	11.7996
1417125_at	9.29626	9.07144	9.07449	9.16722	9.03585	9.14587	9.07014	9.13583	9.05272	9.0917	8.94647	9.00117	9.09793	8.92217	8.94344	9.05533	9.04445
1417126_a_at	11.9874	11.8989	12.2249	12.2434	12.1598	12.207	12.1277	12.075	12.1561	11.8547	11.6737	12.0371	12.1277	11.995	12.236	12.1348	12.1887
1417127_at	6.79435	6.94781	6.85325	7.00779	7.11606	6.99749	7.02364	7.09511	7.17762	7.09511	7.1549	7.15047	7.26033	7.23365	7.22018	7.24681	7.00295
1417128_at	6.96317	6.87448	6.73613	6.93011	6.7097	7.00284	6.90328	6.90052	6.69991	6.83589	6.57866	6.62255	6.84322	6.3685	6.71347	6.61504	6.74067
1417129_a_at	8.82565	8.70584	8.61549	8.88845	8.70651	8.94222	8.68072	8.84657	8.46188	8.87675	8.55441	8.79581	8.69758	8.66126	8.53133	8.67687	8.98293
1417130_s_at	6.19263	6.37632	6.53941	6.28492	6.43355	6.34765	6.21268	6.1931	6.63816	6.54418	6.5548	6.56477	6.38367	6.71221	6.29656	6.70221	6.48609
1417131_at	6.28486	6.46261	6.45104	6.63347	6.37408	6.38066	6.43453	6.48657	6.55038	6.22749	6.03866	6.30642	6.52474	6.52923	6.43453	6.43453	6.62992
1417132_at	6.53439	6.63724	6.7016	6.58933	6.46364	6.65224	6.64725	6.62102	6.58933	6.48948	6.30558	6.76495	6.53092	6.52387	6.36734	6.44921	6.75012
1417133_at	8.86397	8.88503	8.77944	8.97389	8.73997	9.06881	8.81194	8.84148	8.95736	8.8347	8.63205	8.94532	8.61023	8.85958	8.7041	8.74249	8.80785
1417134_at	10.1828	10.0856	10.3484	10.2897	10.1203	10.1671	10.193	10.2868	10.2767	10.1155	9.85352	9.86844	10.134	10.1493	10.1819	10.1168	10.2227
1417135_at	10.6149	10.5796	10.7098	10.6842	10.3547	10.4174	10.7262	10.6058	10.5796	10.6406	10.537	10.6809	10.3992	10.4482	10.6293	10.4191	10.6678
1417136_s_at	9.65738	9.58056	9.65998	9.71856	9.56754	9.56039	9.74066	9.49625	9.5267	9.67091	9.45012	9.66257	9.53278	9.33985	9.77283	9.50779	9.67203
1417137_at	4.72643	5.02346	5.13021	4.96849	5.10908	5.0836	5.0627	4.91922	5.01635	4.92418	5.11197	5.14669	4.59315	5.20164	5.00259	5.12424	4.84325
1417138_s_at	10.1567	10.1395	10.2522	10.2425	10.2347	10.16	10.2844	10.2933	10.3075	10.2103	10.203	10.2779	10.2007	10.2109	10.0999	10.1987	10.1048
1417139_at	5.26382	5.1086	5.4043	5.18636	5.59524	5.54534	5.41278	5.42227	5.56309	5.29419	5.40266	5.45931	5.40266	5.46008	5.22375	5.28635	5.40266
1417140_a_at	7.78194	7.49726	7.40458	7.9226	7.66449	7.54125	7.45627	7.64205	7.61479	7.74446	7.56818	7.59808	7.62043	7.54748	7.58763	7.45457	7.45207
1417141_at	7.13363	7.11163	7.35407	7.17906	6.97342	7.23969	7.25792	7.27622	7.46678	7.08468	7.48876	7.30194	7.11523	7.60528	7.17087	7.32899	7.08326
1417142_at	9.20393	9.1741	8.98599	9.25327	9.13688	9.07592	9.04692	9.11026	9.16293	9.30585	9.05423	9.31239	9.28621	9.25293	9.10518	9.20798	9.24426
1417143_at	8.48633	8.65835	8.43895	8.54423	8.45028	8.75645	8.47399	8.60715	8.56001	8.57282	8.51537	8.68884	8.1793	8.43226	8.35925	8.20024	8.59822
1417144_at	8.55871	8.45639	8.37802	8.54918	8.32893	8.44711	8.4106	8.63666	8.6437	8.64836	8.38243	8.52199	8.51908	8.3531	8.28804	8.45639	8.34466
1417145_at	6.48602	6.4685	6.48789	6.53344	6.21279	6.38367	6.27627	6.48273	6.31608	6.26383	6.38199	6.20759	6.67258	6.25185	6.39023	6.31023	6.38367
1417146_at	7.89099	8.10199	8.01592	7.90697	8.10083	7.97917	8.05703	7.93715	8.06014	7.89769	7.7844	7.44745	7.87727	7.79597	7.69838	7.74394	7.54487
1417147_at	9.56207	9.45392	9.57384	9.56639	9.72968	9.76145	9.66538	9.59907	9.59589	9.71047	9.51098	9.68438	9.87303	9.42895	9.50934	9.67642	9.48416
1417148_at	7.28774	7.33503	6.97651	7.29071	7.02282	7.20615	7.13089	7.32173	7.10097	7.06505	7.10154	7.11665	7.35407	7.17094	7.14711	7.18888	7.04782
1417149_at	7.12955	7.0776	7.09967	7.29963	7.18708	7.10559	7.08076	7.09182	7.18708	7.31609	7.03234	7.17057	7.28775	7.2305	7.47004	7.17137	7.25733
1417150_at	5.00015	5.18225	4.98265	4.89174	5.04011	5.04026	5.07346	5.07346	5.02888	5.11257	5.03422	5.16884	5.07346	5.30252	5.0282	5.04503	5.47411
1417151_a_at	11.3608	11.3463	11.2559	11.3742	11.2869	11.3101	11.3808	11.2116	11.3018	11.4503	11.3038	11.3619	11.3275	11.2154	11.3075	11.3223	11.3417
1417152_at	8.82821	8.86757	8.93385	8.96021	8.76952	8.93949	8.93731	8.74677	8.8093	8.81572	8.80821	9.01239	8.97799	8.99135	8.84984	8.77523	8.87315
1417153_at	7.84006	7.94872	7.74214	7.87693	7.79888	7.8255	7.89133	7.60709	7.70259	7.85087	7.6373	7.9482	7.70626	7.72121	7.74259	7.69993	7.65945
1417154_at	9.91106	9.72597	9.71222	9.8548	9.75345	9.79642	9.79079	9.79396	9.79175	9.82143	9.64786	9.73325	9.88553	9.86037	9.74777	9.74312	9.92084
1417155_at	7.1049	7.25087	6.98588	7.37365	6.9933	7.10861	7.10864	7.29607	7.11713	6.96009	7.21426	6.99423	7.11435	7.04	6.9027	6.73529	7.13095
1417156_at	4.67464	4.58136	4.59765	4.68681	4.90646	4.67396	4.62149	4.60838	4.73901	4.57257	4.50815	4.64736	4.84028	4.69711	4.56729	4.83839	4.92403
1417157_at	10.7372	10.5771	10.7135	10.8566	10.7821	10.7549	10.6724	10.7871	10.7124	10.6835	10.5561	10.7524	10.7456	10.7006	10.692	10.6475	10.7372
1417158_at	6.27456	6.15415	6.24496	6.39955	6.06242	6.24619	6.14651	6.32399	5.90907	6.07743	6.18528	5.94629	6.49688	6.03008	6.13755	5.99644	6.39536
1417159_at	6.3351	6.48316	6.48321	6.66947	6.51228	6.64129	6.8217	6.50201	6.73134	6.57332	6.7236	6.67599	6.58093	6.69528	6.63669	6.72187	6.61545
1417160_s_at	6.60846	6.6684	6.71523	6.90605	6.79377	6.69629	6.7862	6.81083	6.71625	6.71516	6.75632	6.67599	6.82262	6.73297	6.3362	6.35717	6.61987
1417161_at	8.59125	8.58025	8.58112	8.46711	8.55989	8.51469	8.56567	8.39011	8.50394	8.66818	8.56558	8.76969	8.91663	8.79139	8.81962	8.73457	8.71227
1417162_at	8.97407	8.97786	8.94361	9.00725	8.92192	9.03439	8.99078	8.92323	8.88133	8.87043	8.90589	8.85526	8.69645	8.7268	8.8507	8.83651	8.92014
1417163_at	5.04879	4.89445	4.6955	4.733	4.87626	4.8608	4.76449	4.89445	4.70847	4.74937	5.21321	5.42796	4.6922	5.15639	4.91716	4.9763	4.733
1417164_at	6.48185	6.28172	6.22626	6.20632	6.21279	6.43355	6.24511	6.25226	6.19134	6.36531	6.20977	6.30634	6.52794	6.27408	6.25226	6.0796	6.31734
1417165_at	9.06212	9.04012	9.09858	9.14707	8.99032	9.02809	9.14121	9.1817	9.11267	8.96801	9.1357	9.00223	9.13253	9.07371	8.99193	9.02611	9.08235
1417166_at	9.41182	9.45173	9.44163	9.48796	9.21944	9.44212	9.42378	9.47773	9.49135	9.46452	9.09529	9.40463	9.39464	9.28303	9.3899	9.36741	9.38938
1417167_at	7.70749	7.71612	7.69892	7.65406	7.73761	7.84241	7.68378	7.77339	7.87698	7.64854	7.71323	7.77864	7.85184	8.06457	7.67229	7.70795	7.64228
1417168_a_at	10.3205	10.1335	9.85117	9.9602	9.72804	9.8062	10.1415	9.9	9.81307	9.60582	9.38883	9.33783	9.42173	9.1336	9.53343	9.63975	9.41701
1417169_at	10.0535	10.0237	9.77499	9.848	9.74664	9.80377	9.9447	9.88754	9.75819	9.59907	9.577	9.44197	9.55719	9.24336	9.43519	9.63014	9.49959
1417170_at	8.99523	8.7564	8.93216	9.01615	8.97386	8.90747	8.96216	8.88538	8.9775	8.88972	8.7408	8.94337	9.01502	8.88984	8.99487	8.97004	9.13681
1417171_at	4.34925	4.48883	4.39281	4.04074	4.52223	4.22814	4.49958	4.12022	4.28094	4.43512	4.25778	4.30568	4.33281	4.33281	4.20013	4.33281	4.05622
1417172_at	3.76566	3.85606	3.97781	3.96956	3.97781	3.98482	4.02502	4.04708	4.09061	3.93962	4.03493	4.04532	3.98342	3.87251	3.88973	3.97006	3.94768
1417173_at	8.66276	8.49286	8.4622	8.48321	8.44342	8.38734	8.61046	8.46248	8.38091	8.67519	8.47263	8.405	8.47532	8.30446	8.49787	8.5164	8.49404
1417174_at	8.32412	8.22824	8.22152	8.34604	8.25657	8.30149	8.26487	8.29461	8.32424	8.47222	8.19827	8.288	8.42941	8.44206	8.33957	8.40235	8.39622
1417175_at	9.33936	9.42679	9.28618	9.34359	9.23493	9.27625	9.234	9.05677	9.18755	9.23068	9.2345	9.13314	9.3446	9.0267	9.13848	9.23493	9.16264
1417176_at	9.88668	9.80395	9.66593	9.79017	9.59743	9.62337	9.68717	9.65751	9.60213	9.73561	9.67139	9.6496	9.73369	9.4254	9.42482	9.57508	9.54815
1417177_at	7.38148	7.36809	7.37195	7.4682	7.35229	7.60302	7.51123	7.38608	7.49094	7.29059	7.30526	7.4745	7.41799	7.41203	7.33891	7.18877	7.38545
1417178_at	5.96858	5.80638	6.02279	6.08831	6.14693	6.02279	5.90291	5.97207	6.18854	6.00323	6.17491	6.0392	6.0128	6.10069	6.07471	5.84214	5.99389
1417179_at	10.7889	10.8974	10.8183	10.8913	10.7695	10.8037	10.8822	10.6854	10.7211	10.9234	10.9847	10.8183	10.8055	10.7538	10.7904	10.7715	10.8568
1417180_at	7.79151	7.93677	7.80897	7.84645	7.90119	7.63674	7.8368	7.85798	7.79855	7.78566	7.83523	7.8501	7.86484	7.88544	7.85182	7.83141	7.62442
1417181_a_at	10.1874	10.1819	10.0458	10.2216	10.1397	9.98787	10.0466	10.2179	9.98932	10.1138	9.96268	9.86844	10.0266	9.75619	10.1126	10.1204	10.1004
1417182_at	9.56538	9.40119	9.46565	9.53286	9.53441	9.47834	9.44237	9.46565	9.45086	9.40185	9.33225	9.371	9.44503	9.41081	9.35394	9.42175	9.47543
1417183_at	10.3817	10.4044	10.4407	10.5086	10.432	10.4706	10.3571	10.261	10.3108	10.453	10.2126	10.3998	10.3338	10.4015	10.5359	10.3463	10.4198
1417184_s_at	11.8366	11.8949	12.2209	12.2611	12.2884	12.294	12.0418	11.9788	12.3888	12.2235	12.5839	12.6238	12.2789	12.8229	12.1607	12.3793	12.3303
1417185_at	10.3586	10.3093	10.6005	10.5158	10.5385	10.5574	10.5429	10.7241	10.774	10.6396	10.7467	10.7659	10.7642	10.9797	10.6696	10.8176	10.8387
1417186_at	11.1155	11.0943	11.1392	11.1616	11.1424	11.1185	11.1641	11.0812	11.2554	11.1962	10.9894	11.1064	11.0596	11.1087	11.0785	11.0652	11.1181
1417187_at	6.55806	7.14749	6.92469	6.57593	6.46364	6.73055	6.8242	6.29267	6.90568	6.73055	6.21214	6.79506	6.64241	6.81173	6.99503	6.59141	7.05244
1417188_s_at	8.30224	8.31161	8.39925	8.35575	8.11051	8.28595	8.53527	8.21045	8.28276	8.26493	7.68497	8.11859	8.2474	7.98625	8.51019	8.17053	8.45332
1417189_at	8.74176	8.89878	8.89878	8.88344	9.00476	9.04692	8.91452	8.95065	9.00732	8.76226	8.76862	8.91852	8.94254	8.9794	8.91862	8.82657	8.78425
1417190_at	8.91254	8.71235	8.79428	8.75168	8.70463	8.82482	8.78689	8.76527	8.70984	8.82891	8.65259	8.83517	8.94238	8.7136	8.77289	8.77548	8.86473
1417191_at	10.7161	10.636	10.8247	10.8143	10.7745	10.8025	10.817	10.6648	10.5904	10.6254	10.367	10.6713	10.7664	10.5845	10.8231	10.7669	10.8615
1417192_at	8.68841	9.00751	9.32021	8.93069	8.61152	9.12681	9.00783	8.88241	8.93131	8.92013	8.4236	8.79085	8.89914	8.48987	8.99696	8.83695	8.95864
1417193_at	10.4359	10.5038	10.5326	10.5641	10.5704	10.642	10.6587	10.4278	10.5363	10.514	10.3761	10.4626	10.6473	10.4636	10.6201	10.5572	10.5768
1417194_at	5.5908	5.76873	5.73203	5.71616	5.72451	5.71586	5.6208	5.42475	5.63623	6.01629	5.62652	5.87968	5.89021	5.83055	5.95846	6.06926	5.74336
1417195_at	7.2717	7.13613	7.3816	7.2959	6.91766	7.33566	7.39094	6.96096	6.9375	7.19477	6.92054	7.05878	7.15925	6.85086	7.29202	7.03821	7.21402
1417196_s_at	8.32518	8.22548	8.59647	8.52959	7.87964	8.30616	8.66576	8.35936	8.23933	8.23933	7.84769	8.08236	8.11723	7.85552	8.31821	8.15322	8.38276
1417197_at	5.97826	6.02347	6.20492	6.1602	6.13721	6.07421	6.11404	5.8284	6.03045	5.98279	5.89134	6.03045	5.93473	5.91521	5.99209	6.07663	5.89645
1417198_at	4.54313	4.62304	4.91552	4.78764	4.76914	4.73504	4.93172	4.75631	4.65074	4.80211	4.7985	4.82476	4.78984	4.70867	4.65133	4.8114	4.69579
1417199_at	8.89124	8.81293	8.80413	8.93584	8.90382	8.89717	8.84274	8.98103	8.83503	8.85813	8.68577	8.86071	8.69949	8.97517	8.88359	8.84981	8.88359
1417200_at	9.30072	9.34459	9.41244	9.32395	9.53256	9.60171	9.47038	9.37445	9.43972	9.46984	9.32501	9.55736	9.4981	9.67484	9.33546	9.46746	9.54602
1417201_at	8.62139	8.58501	8.58395	8.49181	8.53622	8.52454	8.58395	8.54475	8.58395	8.669	8.63878	8.71152	8.73568	8.56483	8.43231	8.59647	8.58395
1417202_s_at	9.88613	9.77026	10.0537	9.98527	9.73297	9.93986	10.0997	9.94133	9.92937	9.83729	9.54472	9.67379	9.92693	9.79569	10.0924	9.79902	10.0028
1417203_at	7.47744	7.49115	7.4136	7.55451	7.45172	7.49954	7.45177	7.40099	7.28307	7.66194	7.39451	7.70245	7.49515	7.69196	7.49455	7.36693	7.55704
1417204_at	9.22535	9.23994	9.15683	9.27333	9.12875	9.28159	9.18644	9.22369	9.14071	9.2179	9.05684	9.28843	9.12677	8.99852	9.31454	9.26892	9.22369
1417205_at	5.99248	6.12254	5.9732	5.98294	5.97984	6.07339	6.09508	5.77201	6.19177	6.14962	6.01059	6.30505	5.9222	5.87774	5.74604	6.00396	5.85685
1417206_at	8.26495	8.27623	8.42636	8.39675	8.5254	8.40702	8.49999	8.4461	8.4738	8.32306	8.32756	8.51344	8.46104	8.53577	8.32306	8.33765	8.39307
1417207_at	6.4964	6.6551	6.45207	6.68722	6.26872	6.35915	6.43105	6.39101	6.356	6.3107	6.49936	6.39756	6.45849	6.3204	6.30749	6.22822	6.32834
1417208_at	7.71113	7.86838	7.84486	7.94604	7.71442	7.88418	8.0078	7.7564	7.91065	8.08062	7.80725	7.97206	8.09622	7.94868	7.88418	7.96543	7.90761
1417209_at	9.28943	9.14898	9.08909	8.93532	9.11626	9.05507	9.14984	9.1979	9.02244	8.97389	9.08138	8.95459	8.976	8.57344	8.75956	9.04267	8.95996
1417210_at	8.61324	8.36871	8.48858	8.31818	8.09122	8.25623	8.00921	7.94513	8.24764	8.18387	7.91025	7.63003	8.35532	7.61486	8.45638	8.1477	7.96357
1417211_a_at	9.4667	9.40633	9.49948	9.72158	9.71426	9.61142	9.55394	9.32304	9.48287	9.51597	9.2329	9.51306	9.56264	9.50903	9.782	9.44854	9.62208
1417212_at	8.33359	8.39714	8.43498	8.57542	8.62008	8.54377	8.52247	8.6633	8.5822	8.517	8.28014	8.57904	8.60298	8.5848	8.54258	8.55513	8.47479
1417213_a_at	8.3583	8.31002	8.26964	8.35152	8.26352	8.31686	8.23415	8.12212	8.22487	8.34298	8.2399	8.26989	8.25191	8.25748	8.25607	8.28674	8.22197
1417214_at	8.95852	8.89167	8.97514	9.13705	9.12052	9.08953	9.06648	8.89532	8.89312	8.82879	8.51984	8.91426	9.05648	8.91046	9.07062	8.84507	9.04334
1417215_at	7.12467	7.09189	7.14269	7.09385	6.95746	7.13556	7.34485	7.23124	7.09018	7.14336	6.82414	6.81358	7.20777	7.07183	7.2626	6.95306	7.13296
1417216_at	9.0259	8.99165	8.924	9.03057	8.8304	8.90701	8.94128	8.76077	8.82483	9.17056	8.95923	9.05348	9.18409	8.98111	9.05672	9.05859	9.00785
1417217_at	5.62291	5.49308	5.53502	5.38318	5.43051	5.45671	5.37981	5.68807	5.44618	5.22597	5.59912	5.55091	5.37327	5.40489	5.39907	5.32252	5.34494
1417218_at	6.39723	6.24042	6.43762	6.46705	6.23432	6.36442	6.63244	6.16776	6.39723	6.49702	6.34249	6.43168	6.37944	6.32814	6.28247	6.11767	6.4312
1417219_s_at	9.59863	9.77572	9.77987	9.85022	9.71141	9.92848	9.83716	10.0269	9.77273	9.79883	9.42259	9.81776	9.85649	9.81776	9.9337	9.76744	9.98106
1417220_at	8.18551	8.20609	8.15817	8.12907	8.20609	8.22936	8.30334	8.21362	8.26453	8.22985	8.22694	8.28968	8.29837	8.18116	7.97973	8.35497	8.08039
1417221_at	7.20114	7.2596	7.36801	7.17233	7.23495	7.22927	7.34104	7.18128	7.04042	7.4256	6.98426	7.23495	7.49081	7.16448	7.17058	7.16714	7.25171
1417222_a_at	5.74227	5.66594	6.01166	6.03187	5.89806	5.95429	6.00335	6.07687	5.98465	5.60836	5.7082	5.56013	5.77823	5.47615	5.77713	5.6857	5.923
1417223_at	10.1392	10.0728	10.0753	10.0553	10.052	10.005	10.0194	10.0124	10.0989	10.2642	10.1816	10.1897	10.2817	10.1588	10.0407	10.1255	10.1129
1417224_a_at	6.56829	6.31688	6.669	6.60542	6.22766	6.67042	6.74586	6.6897	6.47879	6.62549	6.57806	6.6593	6.69935	6.32556	6.7998	6.60542	6.45007
1417225_at	10.6608	10.8411	10.6888	10.4933	10.4861	10.5282	10.5969	10.591	10.6212	10.4732	10.3355	10.4278	10.6351	10.5058	10.5566	10.4934	10.7634
1417226_at	8.47842	8.57886	8.47842	8.49827	8.42725	8.46727	8.47842	8.43277	8.42411	8.47429	8.6479	8.48481	8.47141	8.49639	8.436	8.45658	8.39183
1417227_at	9.06971	8.90249	8.83265	8.9102	8.82632	8.82604	8.72884	8.908	9.00121	8.96838	8.77179	8.89116	8.8856	9.00699	8.78122	8.88341	8.86671
1417228_at	7.61957	7.68039	7.58376	7.54157	7.53591	7.55173	7.53169	7.4271	7.47896	7.67	7.69326	7.69158	7.60242	7.50447	7.43209	7.44462	7.42788
1417229_at	6.8913	7.03283	6.97477	6.88635	7.0129	6.92456	6.97166	7.07984	6.89421	6.91485	6.89216	6.8345	6.75741	6.47283	6.88414	6.87667	6.83295
1417230_at	5.85148	6.18988	6.01247	5.74043	5.96838	6.02279	6.00335	6.01247	5.9995	6.14818	5.9914	6.12088	6.0913	5.98503	6.01247	5.85919	6.21285
1417231_at	5.22591	5.16797	5.04891	5.58366	5.20783	5.30386	5.35337	5.17115	6.06864	4.9355	5.44815	6.02876	4.73702	7.14783	5.36701	6.69758	5.33048
1417232_at	5.84153	6.07294	6.09778	6.12133	6.12133	6.0387	5.96559	6.04834	6.32447	6.06207	6.19448	6.64411	5.89138	6.31256	6.24548	6.28746	6.1927
1417233_at	10.4283	10.3741	10.4283	10.4576	10.6062	10.463	10.4593	10.4283	10.5005	10.2956	10.2856	10.4246	10.5926	10.5227	10.2779	10.3664	10.4106
1417234_at	4.59255	4.61157	4.4725	4.5516	4.72522	4.63854	4.53131	4.5516	4.39604	4.39254	4.62135	4.34733	4.5516	4.56464	4.59654	4.18467	4.60551
1417235_at	11.0923	11.237	11.0867	11.0898	10.9292	10.9829	11.0979	10.8119	10.9634	11.3094	11.0936	11.0913	11.0815	10.8257	11.1422	11.1837	11.0487
1417236_at	9.83212	10.0285	9.90628	9.77843	9.80853	9.80417	9.855	9.70602	9.75961	9.95218	9.91406	9.77702	10.0363	9.76602	10.0077	9.98564	9.81136
1417237_at	7.79654	7.90183	7.71373	7.77723	7.92309	7.70334	7.78142	7.84079	7.83568	7.72276	8.03125	7.76948	7.73302	7.72923	7.63724	7.70515	7.77087
1417238_at	8.92605	9.01725	9.03447	8.89638	9.02526	9.06159	9.16266	9.0085	9.20393	8.9286	9.10072	9.15292	9.12682	9.12387	8.87735	8.8458	8.83431
1417239_at	9.51341	9.63086	9.99255	9.92227	9.88836	10.0089	9.87933	9.95084	9.90472	9.62003	9.37053	9.54884	9.63426	9.56328	9.96176	9.76821	9.56583
1417240_at	8.56017	8.63941	8.50948	8.53019	8.41859	8.528	8.55656	8.3797	8.45702	8.61845	8.47212	8.50593	8.34595	8.16577	8.20279	8.33865	8.33661
1417241_at	8.65082	8.65915	8.66729	8.65915	8.60089	8.68243	8.64819	8.57327	8.56336	8.68682	8.4751	8.78373	8.67952	8.71003	8.63947	8.72115	8.71228
1417242_at	10.4233	10.351	10.3387	10.4244	10.2967	10.3281	10.4144	10.3823	10.3219	10.3745	10.3648	10.3561	10.33	10.096	10.2316	10.2504	10.2301
1417243_at	9.73752	9.6955	9.68402	9.73752	9.67344	9.72384	9.66279	9.78483	9.79191	9.86137	9.80831	9.90514	9.84397	9.73713	9.55665	9.71577	9.74521
1417244_a_at	4.88013	4.91482	5.21255	5.03316	5.09381	5.03316	4.96066	5.09939	5.0836	4.9821	5.06548	5.16434	4.92594	5.03316	4.88837	5.31585	4.89943
1417245_at	8.7881	8.65662	8.70742	8.82569	8.64709	8.74575	8.6737	8.66541	8.78698	8.70742	8.63221	8.70742	8.72517	8.78888	8.70085	8.70115	8.70742
1417246_at	4.18093	4.21006	4.22495	4.19701	4.21119	4.06241	4.17307	4.31392	4.33063	4.21707	4.21006	4.10545	4.1359	4.35808	4.19211	4.22842	4.21006
1417247_at	8.96634	8.9327	9.06492	9.11041	9.03687	9.02982	9.19454	8.97886	9.03121	8.97473	8.89932	9.00928	8.88353	9.03399	8.99739	8.91444	9.0162
1417248_at	9.37141	9.41264	9.39772	9.45056	9.35635	9.21793	9.42969	9.40805	9.30348	9.56244	9.44223	9.48823	9.33265	9.42549	9.54988	9.39737	9.53259
1417249_at	6.15204	6.15111	6.30564	6.16294	6.01859	6.19941	6.17626	6.20007	6.08712	6.0883	6.24646	6.13333	6.15204	6.20157	6.08511	6.16294	6.16294
1417250_at	9.42871	9.34563	9.35327	9.51334	9.34909	9.34955	9.31078	9.1565	9.21021	9.23387	9.17107	9.17823	9.53137	9.31078	9.37312	9.33393	9.31078
1417251_at	8.39502	7.92357	8.09905	8.08908	8.13841	8.09905	8.1424	8.06612	8.08254	8.12935	7.97341	8.09905	8.18406	8.05542	8.19316	8.06358	8.00688
1417252_at	9.00681	8.73173	9.01495	8.98466	9.00686	8.9514	9.05083	9.07222	9.07578	8.89461	8.70044	8.95192	9.0658	8.9274	8.81497	8.95305	9.0303
1417253_at	7.31959	7.3643	7.4826	7.30898	7.29125	7.33398	7.47634	7.69023	7.30779	7.38748	7.32679	7.12346	7.34126	7.41049	7.31256	7.29463	7.19491
1417254_at	7.3494	7.08082	7.17866	7.31896	7.22104	7.24343	7.17832	7.05225	7.17321	7.23735	6.89216	7.08643	7.17832	7.08973	7.2819	7.07704	7.21763
1417255_at	8.70224	8.66146	8.36894	8.4841	8.51698	8.35784	8.4841	8.45709	8.42404	8.6532	8.53249	8.58073	8.4841	8.4808	8.37924	8.4841	8.4261
1417256_at	3.42192	3.50405	3.35165	3.45002	3.45002	3.57725	3.4799	3.40476	3.41682	3.27757	3.51659	3.47943	3.53369	3.3774	3.39899	3.50893	3.48427
1417257_at	4.49874	4.91314	4.90636	4.89399	4.79455	4.67572	4.79981	4.82768	4.82896	4.75325	4.82148	4.85172	4.53571	4.8688	4.97736	5.12694	4.82148
1417258_at	11.5783	11.5499	11.5794	11.6	11.6239	11.6037	11.603	11.4633	11.6757	11.5794	11.4044	11.6162	11.5831	11.561	11.5515	11.5786	11.6
1417259_a_at	11.3664	11.4332	11.5264	11.4596	11.5013	11.5617	11.4804	11.34	11.581	11.5633	11.2843	11.463	11.4298	11.2712	11.5125	11.5201	11.2482
1417260_at	10.5029	10.6062	10.457	10.6265	10.4887	10.5317	10.4412	10.4992	10.5021	10.6345	10.7014	10.631	10.4209	10.5304	10.5354	10.6626	10.5532
1417261_at	7.6797	7.75831	7.6512	7.54848	7.84421	7.6797	7.71516	7.66354	7.66967	7.6797	7.62771	7.4881	7.67522	7.89931	7.7589	7.6161	7.63674
1417262_at	8.39224	8.08699	8.47318	8.36231	7.86465	8.0491	8.35451	8.25461	8.27875	7.8412	7.64167	7.6445	7.95331	7.81332	8.34178	8.17384	8.17325
1417263_at	8.18787	8.08871	8.17349	7.91861	7.93804	8.10807	8.13785	7.88131	8.02995	7.74212	7.54221	7.6462	7.82534	7.76875	7.87357	7.93078	7.87304
1417264_at	8.4808	8.44802	8.4539	8.54843	8.55194	8.40601	8.47537	8.42553	8.4621	8.47723	8.40692	8.61248	8.55041	8.56477	8.60155	8.44981	8.64684
1417265_s_at	8.12691	8.24673	8.13248	8.3703	8.07138	8.19784	8.23127	8.05437	8.15609	8.35176	8.03555	8.15609	8.13088	8.07973	8.12101	8.1124	8.03295
1417266_at	6.09875	6.52534	6.3576	6.03813	6.41941	6.26314	6.16411	6.38873	6.30016	6.08887	6.33379	6.42688	6.41524	6.32002	6.34786	6.1759	6.08943
1417267_s_at	4.42997	4.69069	4.78752	4.59006	4.77682	4.66452	4.71179	4.70081	4.72617	4.50219	4.67048	4.84705	4.52328	4.5689	4.79158	4.83626	4.62334
1417268_at	6.67765	6.43245	6.53748	6.50657	6.72545	6.44147	6.47971	6.65683	6.62345	6.62625	6.62625	6.78668	6.77496	6.55552	6.52137	6.65817	6.56112
1417269_at	10.6172	10.5586	10.5086	10.5087	10.3628	10.472	10.4586	10.4011	10.4183	10.5657	10.4921	10.3843	10.4906	10.3248	10.3469	10.4407	10.451
1417270_at	6.29432	5.9025	6.05426	6.1037	5.77205	6.00414	6.1128	5.85725	5.92343	6.1026	6.00016	5.86637	6.02303	5.99828	6.14589	5.83125	6.1037
1417271_a_at	8.20431	8.25076	8.22801	8.32779	8.36595	8.38388	8.29839	8.31908	8.38152	8.01757	8.2272	8.35674	8.09517	8.22111	8.19424	8.27019	8.31585
1417272_at	7.00548	6.68669	6.83816	6.74289	7.13722	6.78903	6.80833	6.80833	6.98346	6.47875	6.69495	6.59843	6.65438	6.94417	6.62231	6.77468	6.67902
1417273_at	6.89542	6.96427	6.9759	7.02927	6.9383	7.083	7.07299	6.94102	6.849	7.47798	7.10747	7.08826	7.30781	7.15588	6.84859	7.33348	7.10776
1417274_at	10.1874	10.1051	10.0383	10.0524	9.9069	10.014	10.0903	10.195	10.1238	10.2241	10.2117	10.2265	10.0405	10.0871	10.0122	10.0737	10.0698
1417275_at	11.953	11.881	12.0343	11.9294	12.0581	12.007	11.9145	11.8229	11.8583	12.0757	11.9607	11.9832	11.7719	11.6704	11.7617	11.9022	11.9995
1417276_at	3.81834	3.713	3.77486	3.6932	3.8138	3.70849	3.83822	3.52909	3.81454	3.8729	3.81782	3.72926	3.92073	3.94697	3.74148	3.87249	3.80148
1417277_at	5.25892	5.26366	5.77996	5.69687	5.47409	5.28949	5.53665	5.5357	5.64363	5.37338	5.50195	5.26737	5.71583	5.62513	5.47898	5.55627	5.46347
1417278_a_at	5.90046	5.85961	5.98416	5.8489	5.42212	5.86901	5.79602	5.79828	5.82619	5.7317	5.82619	5.83496	5.77026	5.81864	5.82619	5.83059	5.82619
1417279_at	11.2737	11.3484	11.344	11.2897	11.367	11.3556	11.2783	11.1148	11.1492	11.3753	11.2026	11.3532	11.2501	11.3151	11.3766	11.4004	11.407
1417280_at	4.40409	4.52891	4.31686	4.38121	4.26315	4.44675	4.44675	4.40893	4.48677	4.54153	4.44675	4.45709	4.43789	4.15801	4.47034	4.69527	4.46544
1417281_a_at	5.69554	5.86208	5.69129	5.74711	6.018	5.89517	5.83642	5.99464	5.98194	5.98356	5.98173	5.93575	5.86117	6.05405	5.78393	5.66778	5.79755
1417282_at	6.12651	6.12011	5.91247	5.99411	5.98971	6.24264	6.0515	6.08539	6.12011	6.12011	6.35994	5.96655	6.12854	6.26676	6.14153	6.10101	6.17431
1417283_at	11.267	11.3247	11.273	11.377	11.3145	11.3564	11.2853	11.0685	11.0793	11.3722	11.1878	11.3881	11.2481	11.1305	11.2309	11.2793	11.3412
1417284_at	8.68238	8.6395	8.71046	8.77503	8.70807	8.62805	8.78604	8.68207	8.7205	8.72063	8.661	8.58504	8.80565	8.74303	8.81751	8.66679	8.85091
1417285_a_at	11.1942	11.3064	11.4615	11.5192	11.4079	11.4215	11.4621	11.5734	11.4507	11.352	11.1765	11.3923	11.4155	11.4258	11.3961	11.3909	11.4179
1417286_at	10.5616	10.606	10.6028	10.6592	10.7504	10.6846	10.7424	10.6459	10.6602	10.577	10.3738	10.6817	10.6861	10.6442	10.704	10.6201	10.6757
1417287_at	7.95345	7.97545	7.75595	7.97044	7.95345	8.05796	7.9077	7.78686	8.02192	7.89099	7.87385	8.01084	7.94402	8.04002	7.91442	7.92106	8.05933
1417288_at	9.63371	9.60834	9.58771	9.49282	9.61208	9.31665	9.4916	9.39147	9.37417	9.56115	9.50496	9.43018	9.38902	9.37128	9.59781	9.53011	9.29341
1417289_at	8.24681	8.2838	8.442	8.131	8.35943	8.09814	8.13795	8.09566	8.1974	8.24289	8.26523	7.9851	8.21926	8.03245	8.06536	8.18481	7.95703
1417290_at	4.96559	4.90316	5.13021	5.19648	5.19743	5.11677	5.10705	5.16137	5.20344	5.00677	5.18113	5.10416	5.07872	5.15237	4.96348	5.40126	4.98632
1417291_at	8.33758	8.40496	8.22152	8.25968	8.25849	8.45295	8.24174	8.36147	8.60543	8.39857	8.44914	8.55437	8.50391	8.6999	8.22979	8.57637	8.34446
1417292_at	5.7499	5.56335	5.47659	5.55791	5.73023	5.80115	5.67522	5.52874	5.92332	5.47935	5.8358	5.76133	5.67522	5.99836	5.57366	5.85919	5.67522
1417293_at	8.29064	8.52671	8.35722	8.39441	8.29568	8.32999	8.30915	7.95931	7.71436	8.29844	7.96425	8.15859	8.11235	7.91659	8.26825	8.18144	8.13512
1417294_at	8.40379	8.51323	8.43682	8.50949	8.37778	8.48328	8.46359	8.30368	8.36892	8.48425	8.47991	8.63196	8.55788	8.49073	8.55354	8.48181	8.41955
1417295_at	9.10195	9.27844	9.0588	9.11486	8.7818	8.91215	9.08007	8.96651	8.83445	9.18413	8.98384	8.91531	8.98511	8.71491	8.95501	8.90309	8.94085
1417296_at	7.73612	7.66836	7.44659	7.70583	7.46342	7.60049	7.72461	7.65541	7.47312	7.54454	7.31986	7.26047	7.65592	7.33567	7.59653	7.36821	7.50559
1417297_at	6.06881	6.16641	6.04347	6.26329	6.26133	6.23792	6.19713	6.27954	6.30411	5.95846	6.24055	6.28275	6.07003	6.05975	6.20055	6.25199	5.98167
1417298_at	9.42852	9.50023	9.53258	9.61669	9.67904	9.58579	9.58772	9.5981	9.54665	9.52742	9.55733	9.74115	9.64638	9.7938	9.41121	9.64716	9.49456
1417299_at	4.44239	4.12929	4.36903	4.36054	4.45669	4.44854	4.35712	4.45665	4.50893	4.51686	4.40547	4.66676	4.42743	4.61337	4.3344	4.42743	4.46744
1417300_at	5.78079	5.8507	5.75901	5.91186	5.93984	5.94797	5.90378	5.83055	6.12588	5.72628	5.80408	5.70603	5.78697	5.81454	5.78393	5.74816	5.78697
1417301_at	7.83636	7.79975	7.6728	7.98091	7.69451	7.90322	7.86266	7.93786	8.07539	7.59538	7.65855	7.70836	7.61353	7.93219	7.64589	7.66791	7.78667
1417302_at	7.52853	7.67223	7.52199	7.50126	7.60544	7.56988	7.52853	7.52853	7.4439	7.46678	7.53645	7.73914	7.32106	7.577	7.56309	7.48702	7.32353
1417303_at	7.25354	7.11383	7.13724	6.7487	7.10254	7.1751	6.90638	7.15414	7.17426	6.78727	6.98486	7.11237	7.11445	7.01098	6.74531	6.79709	6.82913
1417304_at	8.26934	8.16919	7.93996	8.01973	8.10176	7.91926	8.14422	7.96834	7.83054	8.24501	8.25198	7.87835	8.15496	8.1809	8.08109	8.17736	7.96658
1417305_at	7.98458	8.30009	8.19337	8.1615	8.00099	8.05837	8.10408	7.93881	7.86774	7.98925	7.91691	8.05186	8.05967	7.83674	8.03804	7.90097	7.82343
1417306_at	7.33458	7.31583	7.206	7.43298	7.42623	7.19709	7.49006	7.29683	7.33458	7.32579	7.35199	7.32604	7.29718	7.24413	7.33458	7.40092	7.36888
1417307_at	9.32686	9.19464	9.1645	9.10236	9.18993	9.1373	9.19464	9.2922	9.1645	9.13233	9.06898	9.08245	9.07997	9.13945	9.16688	9.07252	9.22802
1417308_at	13.0333	13.0237	12.989	12.9751	12.9907	13.0242	12.9806	12.9261	12.9696	13.0112	12.9378	12.9515	12.9644	12.8058	12.9334	12.9198	12.8966
1417309_at	6.45393	7.0101	6.69724	6.76675	6.88121	6.83603	6.82587	6.78081	6.82147	6.84951	6.92144	6.88714	6.48319	6.64046	6.84678	6.89749	6.74672
1417310_at	7.60836	7.75791	7.805	7.6118	7.81429	7.64282	7.88715	7.71633	7.79603	7.73188	8.05702	7.90593	7.90218	7.82246	7.93671	7.8731	7.73518
1417311_at	10.3798	10.3246	10.1959	10.338	10.3005	10.3567	10.3109	10.4581	10.3748	10.3602	10.4467	10.4345	10.2896	10.2178	10.1866	10.3305	10.319
1417312_at	11.3215	11.3938	11.4374	11.3691	11.4615	11.4463	11.3862	11.2226	11.2476	11.6931	11.3371	11.4035	11.4452	11.2506	11.4981	11.5675	11.4234
1417313_at	9.52904	9.62408	9.71997	9.64575	9.8226	9.60747	9.77306	9.85746	9.77867	9.62595	9.67018	9.66006	9.84016	9.80287	9.78351	9.70145	9.65092
1417314_at	4.67464	4.90176	5.08483	4.97851	5.11519	5.04117	5.09228	5.11598	5.14648	5.00689	5.37508	4.96178	4.91537	5.16922	4.99096	5.04117	5.14758
1417315_at	10.2454	10.1231	10.1405	10.1284	10.0558	10.0956	10.0385	10.0908	10.0917	10.014	10.037	10.0936	10.0648	10.1126	10.0908	10.0194	10.0406
1417316_at	11.0115	11.0783	11.106	11.2258	11.3467	11.1875	11.229	11.0949	11.1442	11.2347	11.0124	11.2087	11.233	11.1972	11.3207	11.2239	11.1424
1417317_s_at	12.648	12.6734	12.7417	12.7417	12.8988	12.7613	12.6806	12.768	12.7681	12.7002	12.5995	12.6463	12.6982	12.739	12.7804	12.7607	12.735
1417318_at	10.7306	10.8172	10.6979	10.7384	10.6198	10.7747	10.7789	10.609	10.6045	10.5668	10.3634	10.4081	10.4624	10.1811	10.6142	10.5968	10.4834
1417319_at	6.20295	6.08728	6.19332	6.00686	5.84936	6.00796	6.18313	6.25759	6.08955	6.08955	6.04901	6.16142	6.07707	6.18263	6.08955	5.99859	6.12387
1417320_at	9.91271	9.92713	9.9511	10.0569	9.96285	9.94494	10.0243	10.0617	9.99912	9.99924	9.82631	9.98788	9.98344	10.1071	9.92723	10.0215	10.0064
1417321_at	9.37202	9.18721	8.95305	9.26917	8.93492	8.66919	8.90327	9.00375	8.81877	9.27981	9.0764	8.65637	9.06074	8.87559	8.95305	8.69594	8.76875
1417322_at	9.03732	8.85865	9.11707	9.06492	9.15555	9.28741	9.33108	9.11515	9.13334	9.13135	9.22032	8.85705	9.36958	9.1117	9.01784	9.14981	8.93797
1417323_at	7.82114	7.5218	7.59799	7.75029	7.64244	7.64629	7.85699	7.73455	7.76868	7.9768	7.82772	7.85222	7.97973	7.74949	7.69403	7.8859	7.9779
1417324_at	10.1523	10.0262	9.79499	10.0366	9.7817	9.90437	9.98176	9.91731	9.8295	9.90227	9.80228	9.90913	9.89688	9.79024	9.90288	9.84929	9.85486
1417325_at	7.61353	7.41098	7.35588	7.45687	7.25909	7.45946	7.41597	7.33747	7.32587	7.18568	7.15715	7.32023	7.42636	6.88004	7.28393	7.34713	7.22272
1417326_a_at	10.0574	10.305	10.2312	10.2361	10.2831	10.2515	10.2054	10.1729	10.1316	10.2474	10.1336	10.1779	10.3265	10.3061	10.321	10.262	10.1993
1417327_at	10.0871	9.94898	9.85631	10.2541	10.0631	10.1765	9.90295	10.1889	9.97261	9.82132	9.62133	9.92233	9.94708	9.9282	9.92413	9.84839	9.99923
1417328_at	8.29758	8.15405	8.34806	8.25894	8.2583	8.26977	8.30013	8.35405	8.27648	8.26355	8.2272	8.36159	8.36389	8.22532	8.24133	8.24001	8.27648
1417329_at	10.5281	10.5614	10.4579	10.4228	10.3702	10.568	10.4061	10.4228	10.4701	10.4049	10.358	10.3332	10.3797	10.2929	10.2562	10.3915	10.332
1417330_at	7.32737	7.42682	7.39027	7.06367	7.31886	7.64035	7.24673	7.3796	7.26543	7.33064	7.30726	7.35733	7.31671	7.05563	7.28632	7.49783	7.27792
1417331_a_at	9.33124	9.26383	9.33124	9.4848	9.34803	9.4496	9.29574	9.08403	9.14635	9.3254	8.91845	9.34243	9.46268	9.42397	9.55654	9.26506	9.43565
1417332_at	6.0784	6.28925	5.97959	5.79664	5.98243	5.82897	6.13031	6.03117	6.11133	6.11715	6.04457	6.08215	5.83055	5.88189	6.17404	5.91723	6.14361
1417333_at	4.53293	4.85831	4.6922	4.95737	4.72696	4.75718	4.76314	4.73304	4.67747	4.8573	4.52666	4.84982	4.46271	4.67342	4.71712	4.60223	4.53472
1417334_at	8.50885	8.4615	8.44036	8.56363	8.54037	8.55079	8.48862	8.62172	8.53188	8.63732	8.63377	8.45063	8.65753	8.5319	8.37843	8.47352	8.4594
1417335_at	7.66396	7.72103	7.66167	7.73622	7.75613	7.92601	7.8702	7.46652	7.76036	7.68851	7.2958	7.52179	7.79261	7.63723	7.64377	7.77543	7.72081
1417336_a_at	5.57115	5.66755	5.5184	5.53998	5.56483	5.57185	5.53995	5.55334	5.62446	5.54021	5.55817	5.69631	5.7899	5.7688	5.4508	5.54717	5.33009
1417337_at	3.40633	3.50361	3.37351	3.39869	3.43181	3.27937	3.40633	3.36283	3.4726	3.19954	3.42943	3.47604	3.61421	3.55254	3.40633	3.23346	3.52553
1417338_at	4.73008	4.83226	5.06848	5.01393	5.30362	5.1446	5.15536	5.08381	5.06848	4.76503	5.23395	5.21483	5.17034	4.89537	5.17708	5.06848	5.02567
1417339_a_at	13.5102	13.379	13.5507	13.6771	13.5121	13.5491	13.6558	13.426	13.3909	13.5084	13.2794	13.5402	13.4804	13.3948	13.8941	13.5037	13.6488
1417340_at	8.78655	8.79289	8.99394	9.13628	8.86154	9.09872	9.08562	8.80512	8.92172	8.9081	8.61092	8.80311	9.06057	8.84236	9.35298	8.93265	9.01193
1417341_a_at	9.75633	9.77121	9.93856	9.81964	9.86044	10.0131	9.89834	9.82826	9.86163	9.87441	9.55219	9.9025	9.86163	9.5518	9.91383	9.97277	9.79156
1417342_at	7.32737	7.50738	7.50092	7.53941	7.56166	7.53231	7.5363	7.36615	7.58567	7.49293	7.45609	7.46005	7.65917	7.56068	7.3832	7.48396	7.50092
1417343_at	10.1237	9.98672	9.86351	10.1104	10.1249	10.2032	9.90237	10.0987	10.1426	10.0257	9.76545	10.1966	10.2441	10.0351	9.89163	9.92457	9.96083
1417344_at	11.3837	11.362	11.4764	11.4831	11.596	11.5811	11.4655	11.4153	11.4655	11.4655	11.2863	11.5036	11.4845	11.3808	11.4463	11.5408	11.4393
1417345_at	7.37602	7.19776	7.40316	7.44612	7.4194	7.52308	7.22036	7.26085	7.25701	7.40453	7.12642	7.51258	7.41167	7.36486	7.38436	7.52867	7.38908
1417346_at	6.56199	6.62547	6.59942	6.70539	6.69182	6.86049	6.67848	6.71399	6.75821	6.39558	6.76509	6.93926	6.78931	6.47884	6.5894	6.53944	6.67848
1417347_at	3.75306	3.47999	3.86308	3.98684	3.96829	3.82703	3.81218	3.82402	3.77575	3.80294	3.99002	3.79299	3.86308	3.98119	3.89	3.86308	3.9283
1417348_at	7.62868	7.49712	7.64906	7.59983	7.59965	7.54086	7.63043	7.64702	7.82441	7.33049	7.53085	7.36001	7.31377	7.59096	7.36244	7.50569	7.43428
1417349_at	10.4175	10.3156	10.2901	10.4064	10.2878	10.4136	10.3901	10.2424	10.2365	10.2584	10.1435	10.1352	10.2795	10.1626	10.3075	10.2474	10.3323
1417350_at	7.76288	7.51058	7.69577	7.70808	7.77855	7.83066	7.791	7.65827	7.84559	7.63105	7.47977	7.57436	7.84633	7.6199	7.67796	7.63651	7.65959
1417351_a_at	8.80665	8.74652	8.90391	9.02512	8.76018	8.8658	8.76885	8.93411	8.84799	8.76277	8.63105	8.56047	8.87884	8.56445	8.61017	8.67664	8.80121
1417352_s_at	8.44477	8.52805	8.55848	8.66978	8.54738	8.5845	8.55768	8.54385	8.43646	8.50808	8.37012	8.35559	8.59253	8.54699	8.63668	8.47799	8.43092
1417353_x_at	8.56589	8.47913	8.67644	8.81562	8.55772	8.76045	8.54807	8.6633	8.50491	8.43748	8.31834	8.49539	8.54206	8.53056	8.65749	8.50442	8.57831
1417354_at	8.21345	8.21519	8.31259	8.34646	8.43615	8.3409	8.58856	8.52933	8.34641	8.25024	8.34152	8.1659	8.2773	8.27685	8.20905	8.20725	8.20782
1417355_at	10.9014	10.773	10.3931	10.568	10.4761	10.2943	10.35	10.6409	10.3452	10.5595	10.5805	10.5394	10.2839	10.2809	10.5748	10.5045	10.6242
1417356_at	9.55167	9.77577	9.42288	9.40856	9.26993	9.47676	9.31078	9.27761	9.1817	9.68747	9.1462	9.52273	9.5167	9.19621	9.42189	9.43366	9.51105
1417357_at	9.03864	8.88614	8.90465	9.10107	8.87422	8.92176	8.89003	9.04371	9.01156	8.97753	9.01079	9.02879	8.96077	9.01492	8.73988	8.79445	9.0067
1417358_s_at	7.79819	7.81034	7.75216	7.51744	7.80973	7.87924	7.85378	7.80973	7.76361	7.86103	7.88321	7.65325	7.83113	7.6258	7.81087	7.82706	7.88613
1417359_at	7.92036	8.08316	8.12295	8.08537	8.16942	8.28221	8.06128	8.04523	8.16213	8.09036	8.09067	8.15219	8.08675	8.02411	7.96946	8.00269	8.07068
1417360_at	6.99382	7.0689	6.97477	7.00585	6.94971	6.85393	7.03998	7.18945	6.90595	7.07164	6.94971	6.63735	6.83847	6.75885	6.9862	6.64836	6.8178
1417361_at	8.34411	8.51612	8.5016	8.5016	8.50448	8.4085	8.46717	8.4131	8.46312	8.5016	8.38449	8.52655	8.65794	8.59239	8.62826	8.54213	8.66445
1417362_at	5.97372	5.97035	5.92989	6.00254	6.08699	6.02279	6.02792	5.78418	6.11887	5.84202	6.1496	6.23184	5.88874	6.1297	5.95868	6.08699	5.94282
1417363_at	7.24131	7.42652	7.40064	7.58591	7.29936	7.43569	7.29006	7.29909	7.29006	7.48619	7.26749	7.31995	7.26714	7.03166	7.2383	7.16745	7.13609
1417364_at	12.1954	12.2937	12.2924	12.3227	12.2625	12.3259	12.2487	12.3433	12.3085	12.3343	12.2694	12.33	12.3776	12.3938	12.2587	12.2563	12.3281
1417365_a_at	12.814	12.8852	13.0225	12.9211	12.9505	12.9766	13.028	12.7318	12.7197	12.9034	12.7064	12.9001	13.007	12.7728	13.0755	12.9039	13.0079
1417366_s_at	12.6347	12.6691	12.826	12.7201	12.7096	12.7042	12.7125	12.7572	12.8069	12.6953	12.5657	12.6906	12.8075	12.7143	12.8143	12.7678	12.7701
1417367_at	12.8004	12.7195	12.7533	12.7791	12.6973	12.8015	12.7253	12.661	12.7337	12.7813	12.5649	12.7433	12.7081	12.6234	12.8013	12.7133	12.7337
1417368_s_at	11.1291	11.3051	11.2682	11.3583	11.4713	11.3267	11.3316	11.4074	11.3378	11.2531	11.1759	11.3713	11.3402	11.3155	11.3567	11.3204	11.2667
1417369_at	9.41391	9.2987	9.38311	9.43515	9.29019	9.38311	9.32219	9.35802	9.38311	9.44442	9.35193	9.42094	9.42024	9.40185	9.26768	9.39108	9.40517
1417370_at	5.82228	5.66682	5.90335	5.67011	6.14036	5.81051	5.81471	5.76781	5.86983	5.8348	5.96066	5.8846	5.43954	5.95093	6.13342	5.85213	5.80396
1417371_at	9.86802	9.77481	9.77669	9.77947	9.72475	9.6561	9.95271	9.70682	9.56899	9.72711	9.66067	9.55742	9.89348	9.60306	9.82459	9.698	9.73525
1417372_a_at	9.27834	9.12119	9.3029	9.29664	8.85424	9.18549	9.19627	9.15308	9.02779	9.18249	8.90729	8.8759	9.0771	8.68956	9.19615	9.16279	9.05014
1417373_a_at	13.3921	13.4228	13.3468	13.3536	13.3265	13.4013	13.3718	13.3437	13.394	13.3961	13.3189	13.3554	13.3214	13.2203	13.3231	13.3324	13.4082
1417374_at	12.0741	12.0943	12.078	12.0382	12.0007	12.1758	12.1247	12.0432	12.1367	12.1192	11.9792	12.0185	12.0445	11.9081	12.0859	12.0237	12.0867
1417375_at	8.09923	8.30644	8.30253	8.11627	8.28258	8.2776	8.2359	8.3526	8.4668	8.23553	8.50393	8.2776	8.31692	8.2776	8.25918	8.28194	8.22753
1417376_a_at	10.7964	10.9943	10.7564	10.8222	10.6849	10.9021	10.7112	10.7331	10.7266	10.7312	10.4216	10.7136	10.9002	10.7678	10.7964	10.7364	10.8614
1417377_at	10.9908	10.8416	10.771	10.951	10.6957	10.7963	10.73	10.6936	10.7433	10.792	10.3438	10.8929	10.8337	10.7295	10.993	10.6532	10.7895
1417378_at	11.4874	11.5578	11.3101	11.459	11.4202	11.4871	11.2522	11.3861	11.3482	11.3572	11.0119	11.456	11.4738	11.4322	11.4444	11.388	11.393
1417379_at	7.24	7.15409	6.82866	7.17187	7.04553	7.13358	6.97577	7.12137	7.29936	6.96016	7.04134	7.00892	6.95013	7.12137	7.12137	7.24947	7.12137
1417380_at	8.0119	7.87445	7.61664	7.89158	7.60397	8.01601	7.8017	7.90304	8.03323	7.83708	7.81513	7.83708	7.79278	7.61708	7.64881	7.87228	7.79867
1417381_at	9.68013	9.69259	9.86006	9.74506	9.85755	9.86821	9.79813	9.82889	9.98563	9.90237	9.81474	9.98596	9.86586	9.96524	9.86006	9.9078	9.89859
1417382_at	7.73676	7.94989	7.88418	7.93056	7.91299	8.04617	7.93269	7.97062	7.86685	8.10769	7.94323	8.22012	8.12796	8.12315	7.87755	7.93728	8.08098
1417383_at	7.163	7.04549	7.163	7.25403	7.163	7.21594	7.163	7.01997	7.07224	7.28664	7.08126	7.27605	7.21786	7.38931	7.09474	7.12677	7.16042
1417384_at	8.31988	8.30927	8.24425	8.30059	8.09786	8.37239	8.3765	8.14945	8.02891	8.3893	8.11842	8.39738	8.44386	8.32135	8.31968	8.18374	8.41425
1417385_at	10.601	10.5137	10.2687	10.3531	10.3151	10.1932	10.3763	10.1604	10.1958	10.5791	10.4558	10.286	10.3588	10.2952	10.454	10.1894	10.3588
1417386_at	10.7193	10.7817	10.5492	10.6488	10.5046	10.5668	10.5747	10.3876	10.3597	10.8275	10.5956	10.7937	10.6735	10.4897	10.7253	10.5901	10.6953
1417387_at	8.88991	8.91611	9.01849	9.08727	9.08727	9.07731	8.98301	9.18585	9.10553	9.05368	8.89787	9.24206	9.19465	9.20845	9.02453	9.00663	9.02947
1417388_at	12.3404	12.3773	12.3926	12.385	12.5584	12.4691	12.4077	12.3879	12.4228	12.4159	12.2339	12.3952	12.5253	12.355	12.4653	12.3576	12.3522
1417389_at	9.4464	9.41689	9.41532	9.30127	9.15161	9.31479	9.32269	9.30127	9.2431	9.5325	9.3246	9.22789	9.27165	9.01287	9.32296	9.21429	9.13556
1417390_at	9.48353	9.39204	9.52377	9.46788	9.49525	9.54827	9.48353	9.63655	9.52163	9.39147	9.39941	9.42795	9.54568	9.51651	9.3654	9.39391	9.48627
1417391_a_at	8.23076	8.3912	8.37898	8.22004	8.34565	8.23504	8.42944	8.11479	8.3373	8.34467	8.40916	8.23383	8.49351	8.22779	8.3373	8.39482	8.19065
1417392_a_at	5.75175	5.85356	5.79401	5.85768	6.00768	5.88817	5.77036	5.71035	5.96501	5.92999	6.02202	5.96371	5.90761	6.01597	5.9651	5.89304	5.89988
1417393_a_at	8.81067	9.08865	9.05164	9.06568	9.19045	9.01345	8.8615	8.94826	9.1444	8.87096	9.01258	8.93698	8.9977	8.91124	8.75834	8.89977	8.79779
1417394_at	6.36478	6.3815	6.34419	6.64985	6.10455	6.16981	6.23396	6.31074	6.70787	6.5358	6.58676	6.69167	6.59919	6.5358	6.98987	6.89491	6.86851
1417395_at	5.58544	5.50727	5.67593	5.60944	5.53152	5.58602	5.59369	5.47946	5.83414	5.73487	6.01247	5.82014	5.76596	6.00864	6.06817	6.01893	5.97949
1417396_at	5.75936	5.79607	5.75744	5.68979	6.09251	6.17689	6.03818	6.1121	6.12545	5.95846	5.95321	5.95846	5.95846	5.99704	6.02812	5.95846	5.91786
1417397_at	8.84333	9.00278	8.89655	8.81224	8.69068	8.83942	8.89676	8.83949	8.84224	8.98851	9.02374	8.89555	8.77833	8.64925	8.73536	8.83703	8.84333
1417398_at	8.48525	8.53059	8.6142	8.45022	8.70115	8.51341	8.69012	8.34011	8.53994	8.56482	8.51321	8.51785	8.65378	8.41689	8.60057	8.51275	8.43229
1417399_at	10.1046	10.0763	10.0283	10.1617	9.96758	10.0523	10.0697	9.87555	10.0223	10.1241	9.94867	10.0851	10.19	10.0825	10.0149	10.0523	10.0359
1417400_at	6.587	6.67068	6.45581	6.88813	6.64783	6.90514	6.38489	6.88481	6.73466	6.64241	6.0987	6.53936	6.87454	6.8506	6.3653	6.48084	6.64241
1417401_at	5.61956	5.85798	5.86497	5.86497	5.74484	5.94932	5.74126	6.0456	5.80847	5.81695	5.46507	6.04835	5.86497	6.11986	5.77053	5.79399	5.90509
1417402_at	8.47375	8.39553	8.44863	8.54841	8.65205	8.4758	8.5122	8.5864	8.61295	8.51651	8.60882	8.70322	8.63472	8.74225	8.47845	8.49827	8.49825
1417403_at	8.78968	8.6689	8.49908	8.65764	8.37839	8.40524	8.5148	8.37958	8.32339	8.67659	8.56157	8.67659	8.53924	8.57509	8.53442	8.25272	8.58288
1417404_at	10.2211	10.1462	9.94771	10.1849	10.0703	10.0214	10.0382	9.97285	10.0064	10.1221	10.0268	10.1127	10.1494	10.1235	10.0867	9.86585	10.1578
1417405_at	8.72946	8.68328	8.72506	8.76859	8.74942	8.69913	8.82415	8.73301	8.74739	8.74174	8.86959	8.79887	8.79802	8.71413	8.63897	8.78543	8.77113
1417406_at	7.72549	7.61948	7.68287	7.9395	7.7821	7.98593	7.80329	7.80329	7.85153	7.69056	7.73673	7.73534	7.80329	7.74689	7.95391	7.78748	7.80373
1417407_at	7.64863	7.71695	7.66285	7.75741	7.74053	7.75741	7.84042	7.64955	7.4092	7.70282	7.75717	7.38709	7.76684	7.69558	7.69905	7.50251	7.77096
1417408_at	8.43124	8.20419	8.52785	8.31324	8.1102	8.42437	8.45753	8.45219	8.40007	8.49989	8.21791	8.12554	8.46058	8.16196	8.3273	8.55154	8.45007
1417409_at	9.93803	10.0827	9.86425	9.86124	9.66188	9.78518	10.0785	9.71943	9.86641	10.0196	9.83334	10.0359	9.95292	9.65433	9.99268	9.86363	9.94874
1417410_s_at	9.88576	9.70414	9.71644	9.80995	9.65897	9.67767	9.75002	9.78155	9.74596	9.76026	9.6599	9.73989	9.72088	9.59304	9.71382	9.66923	9.7654
1417411_at	11.7834	11.7948	11.984	11.8997	11.7729	11.9114	11.8839	11.8527	11.8286	11.8176	11.5385	11.7682	11.8353	11.7278	11.7122	11.7697	11.9205
1417412_at	7.5957	7.67768	7.45571	7.57451	7.53307	7.57889	7.66796	7.34191	7.38936	7.59713	7.49387	7.51198	7.61905	7.21302	7.24031	7.48127	7.51809
1417413_at	5.68421	5.45221	5.63376	5.48678	5.65402	5.52342	5.62714	5.68601	5.78467	5.5661	5.5375	5.599	5.40088	5.6254	5.55692	5.47569	5.599
1417414_at	11.0522	11.2192	10.9826	10.9713	10.9861	10.8034	10.8488	10.8091	10.8091	10.947	11.0623	10.8215	10.9525	10.8547	10.9357	10.9643	10.9919
1417415_at	5.18453	5.26431	5.19089	4.854	5.24213	5.09931	5.16916	5.13272	5.34899	5.19842	5.39002	5.29278	5.05524	5.3593	5.0641	5.00683	5.24149
1417416_at	11.2305	11.2705	11.0799	11.0485	11.0297	10.7442	11.0103	11.0136	10.9091	10.9775	11.1834	10.9194	10.7604	10.757	10.9601	10.8508	11.0974
1417417_a_at	13.7993	13.9267	13.9228	13.8692	13.8772	13.9153	13.8034	13.8819	13.9182	13.9308	13.8196	13.9337	13.9701	13.8418	13.8507	13.9508	13.8415
1417418_s_at	12.7004	12.7215	12.8018	12.7579	12.8583	12.7901	12.8345	12.8259	12.8859	12.7763	12.8441	12.8106	12.7935	12.7911	12.7531	12.7744	12.8
1417419_at	7.77732	8.04159	8.03405	8.15118	7.93219	7.7222	7.9317	8.10283	8.08388	8.02581	8.11074	8.02807	7.94139	7.74876	8.13035	8.02871	8.05232
1417420_at	8.86226	8.93482	8.9544	8.9057	8.74956	8.86518	8.86469	8.77831	8.93699	8.89715	8.8922	8.90623	8.83322	8.92027	8.90228	8.78318	9.01906
1417421_at	8.74883	8.78008	8.91107	8.9198	8.9904	9.01972	8.94373	9.08446	9.07379	8.75239	8.81776	8.95018	8.98898	9.1614	8.84683	8.96195	8.9198
1417422_at	5.09392	5.08832	5.16866	4.92362	5.4411	5.21562	5.02165	5.15118	5.30225	5.08004	5.24076	5.09085	5.12967	5.28601	5.13711	5.40917	5.11267
1417423_at	12.0482	12.2305	12.0813	12.0084	12.0268	12.0991	12.0737	11.9229	11.9371	12.1869	12.0568	11.9622	12.0013	11.6974	12.0094	12.1785	11.9581
1417424_at	9.65798	9.42266	9.75029	9.7884	9.59559	9.63471	9.62208	9.74349	9.67372	9.70734	9.35906	9.40679	9.68148	9.35597	9.62138	9.60741	9.66641
1417425_at	8.61289	8.76104	8.82818	8.87081	8.7987	8.89058	8.83571	8.81985	8.81519	8.8462	8.84219	8.83339	8.95706	8.96468	8.85786	8.81345	8.94769
1417426_at	8.65588	8.56562	8.56853	8.93887	8.7536	8.9718	8.71066	8.84831	9.04693	8.46793	8.57189	8.71456	8.65304	8.81894	8.74634	8.73005	8.8185
1417427_at	8.75082	8.69724	8.88672	8.83954	9.01287	8.95524	8.90731	9.09239	9.06878	8.93033	8.97845	9.11665	9.11478	9.14658	8.67311	8.82599	8.94859
1417428_at	12.4064	12.3844	12.2789	12.3046	12.3506	12.3917	12.3997	12.3564	12.3533	12.3517	12.2843	12.3034	12.2144	12.0622	12.1853	12.3147	12.3145
1417429_at	7.07787	7.0544	7.12447	7.321	7.35457	7.35011	6.91808	7.49885	7.62091	7.14107	7.24641	7.28011	7.17313	7.58866	7.1087	7.4163	7.3037
1417430_at	6.587	6.6853	6.83812	6.87165	6.9626	6.8873	6.77553	6.73999	6.69659	7.09443	6.78615	7.08639	6.93267	7.02485	6.7832	6.81784	6.81784
1417431_a_at	7.48573	7.81377	7.60901	7.52671	7.57418	7.54474	7.58546	7.46053	7.52093	7.62337	7.80354	7.59952	7.71434	7.67572	7.71381	7.63416	7.59574
1417432_a_at	8.7524	8.82642	8.82632	8.91049	8.72457	8.85769	8.90687	8.62305	8.81195	8.63617	8.48466	8.60048	8.83136	8.52414	8.84163	8.64307	8.79923
1417433_at	10.4467	10.3243	10.4757	10.2717	10.3906	10.4398	10.4927	10.4743	10.469	10.3992	10.5243	10.3725	10.4605	10.3817	10.1639	10.2958	10.3741
1417434_at	11.2703	11.3471	11.1649	11.2014	11.1706	11.0959	11.1244	11.2558	11.1517	11.1495	10.9738	11.067	11.0388	10.9523	11.2192	11.2513	11.1655
1417435_at	11.6796	11.4133	11.2761	11.3955	11.2975	11.3169	11.3916	11.4254	11.2899	11.4246	11.2384	11.3237	11.1747	10.9386	11.2437	11.292	11.269
1417436_at	6.03734	5.90922	6.02482	5.81923	5.50292	5.70407	6.06524	5.85776	5.84417	5.85911	5.80593	6.02705	6.07961	5.91435	5.96887	5.88922	6.06647
1417437_at	7.31968	7.2458	7.20666	7.4328	7.21923	7.22562	7.21213	7.22288	7.37876	7.22562	7.07721	7.16022	7.33897	7.30789	7.15616	7.09271	7.01244
1417438_at	10.1468	10.1468	10.1268	10.2033	10.1681	10.2403	10.2052	10.038	10.0743	10.1468	9.89183	10.2518	10.1973	10.0849	10.2459	10.0673	10.0598
1417439_at	6.34771	6.11857	6.26634	6.16715	6.44137	6.18534	6.27754	6.30307	6.33529	6.1287	6.21207	6.26685	6.21816	6.30056	6.13535	6.23153	6.24897
1417440_at	9.72875	9.94549	9.55869	9.54137	9.47333	9.35537	9.52119	9.55841	9.321	9.60779	9.4674	9.59718	9.42838	9.29517	9.56403	9.41292	9.4531
1417441_at	9.05543	8.96609	9.11465	9.16406	9.15026	9.27846	9.07923	9.18964	9.17713	9.19125	8.93578	9.16406	9.23958	9.22041	9.06249	9.18835	9.16828
1417442_a_at	8.48684	8.36822	8.47288	8.55802	8.56545	8.64169	8.44854	8.41533	8.45375	8.58049	8.15597	8.39473	8.41533	8.17636	8.34092	8.3593	8.31698
1417443_at	5.48402	5.53378	5.55901	5.42813	5.80057	5.77997	5.657	5.38157	5.7499	5.68172	5.67108	5.52256	5.85875	5.59997	5.657	5.64935	5.70897
1417444_at	7.72277	7.47652	7.79412	7.88133	7.53908	7.79122	7.68303	7.5017	7.32922	7.72374	7.39597	7.4607	7.79482	7.32684	8.14204	7.5688	7.93306
1417445_at	4.45924	4.70998	4.70865	4.33293	4.72888	4.72351	4.80383	4.82582	4.71441	4.77864	4.52319	4.93749	4.45445	4.96922	4.70082	4.79003	4.78496
1417446_at	6.59317	6.94624	6.83676	6.96869	7.10151	7.05178	7.10438	7.04118	7.14078	6.87274	6.96869	7.15075	7.05846	7.04155	6.95764	7.08449	6.75198
1417447_at	3.51495	3.73372	3.73028	3.61935	4.02963	3.80453	3.84599	3.67708	3.54094	3.72411	3.73372	3.98927	3.61324	3.89928	3.59013	3.66155	3.80612
1417448_at	8.69395	8.45855	8.4313	8.59569	8.46095	8.44444	8.5891	8.51644	8.3484	8.5766	8.46479	8.53448	8.60172	8.31755	8.36303	8.40834	8.46351
1417449_at	7.80055	7.96782	7.92893	8.01559	8.04095	7.97456	7.99644	8.09354	8.01559	7.99103	8.16155	8.20389	8.07991	8.17991	7.91972	7.99976	7.93053
1417450_a_at	4.93258	4.72075	4.76914	4.76914	4.71426	4.84392	4.78778	4.60752	4.89488	4.74486	4.65704	4.84783	5.06044	4.84706	4.58915	4.76706	4.74964
1417451_a_at	13.9142	13.9551	14.005	13.9926	14.0214	14.0223	13.9736	13.9965	13.986	13.9361	13.8855	13.9436	14.0454	13.9481	14.0032	13.9784	13.9697
1417452_a_at	12.1315	12.2802	12.3301	12.2897	12.4235	12.3361	12.3781	12.3384	12.4579	12.2743	12.2542	12.383	12.338	12.4959	12.3352	12.3173	12.3088
1417453_at	7.23517	7.37263	7.35678	7.5375	7.24417	7.43335	7.43893	7.11837	7.38186	7.397	7.11779	7.43275	7.31401	7.34657	7.52889	7.35717	7.49166
1417454_at	10.4221	10.3012	10.2848	10.3417	10.2105	10.3399	10.2896	10.3707	10.3141	10.3375	10.2209	10.3365	10.3869	10.2213	10.1483	10.2571	10.3384
1417455_at	7.3379	7.32512	7.20796	7.35775	7.23124	7.56346	7.34223	7.39535	7.37876	7.47027	7.38903	7.51235	7.52594	7.66332	7.40842	7.46738	7.34275
1417456_at	9.24135	9.32554	9.28006	9.44801	9.41092	9.21151	9.33925	9.3485	9.3499	9.45778	9.25142	9.24763	9.3485	9.42747	9.35367	9.39123	9.3485
1417457_at	5.81573	5.657	5.72748	5.80987	5.65996	5.61087	5.79264	5.97772	5.81362	6.00241	5.90172	5.88454	6.01117	5.80987	5.59279	5.77901	5.80987
1417458_s_at	5.4466	5.34972	5.21281	5.2988	5.40309	5.26696	5.38148	5.30229	5.18816	5.40033	5.27514	5.33751	5.48383	5.33664	5.26761	5.32555	5.6337
1417459_at	3.76496	4.00461	3.92071	3.90103	3.99217	3.98519	4.07118	3.97705	4.15918	3.99721	4.14788	4.30711	3.82244	4.18167	3.92859	4.18534	4.07118
1417460_at	7.7101	7.60877	7.6796	8.00525	7.89048	8.37598	7.90727	8.16154	8.58634	7.64699	7.6112	7.90539	7.67023	7.95942	7.87732	7.98491	7.92654
1417461_at	5.84544	6.11249	6.04459	6.16188	6.01328	5.8422	6.13945	5.82635	6.0367	6.0541	6.08797	5.75528	5.81361	6.06945	6.054	5.87937	6.21775
1417462_at	4.84552	5.11924	5.16101	5.13538	4.87345	4.92807	5.04525	4.98069	5.0184	4.9992	4.9442	4.89557	4.63927	4.67086	5.17073	4.87628	5.25586
1417463_a_at	11.7033	11.4351	11.6066	11.6376	11.7518	11.6738	11.7931	11.6324	11.6561	11.4605	11.7	11.6882	11.7368	11.6307	11.6251	11.5535	11.8257
1417464_at	4.34155	4.0227	4.30901	4.1345	4.34311	4.15341	4.11478	4.49056	4.34311	4.34311	4.54647	4.56194	4.5659	4.34311	4.36964	4.30001	4.5479
1417465_at	10.4167	10.487	10.3971	10.5764	10.5439	10.5079	10.5213	10.4306	10.4595	10.5939	10.557	10.5503	10.6494	10.6529	10.5372	10.5181	10.6118
1417466_at	11.5741	11.6166	11.6649	11.9033	11.8352	11.8652	11.8002	11.7532	11.7474	11.6827	11.5331	11.7572	11.79	11.7944	11.8948	11.7344	11.8285
1417467_a_at	8.56369	8.62942	8.64621	8.73666	8.56118	8.58077	8.57993	8.4017	8.41292	8.65497	8.59842	8.42727	8.60009	8.35287	8.57993	8.57993	8.50436
1417468_at	9.12127	8.9539	8.85147	9.0046	8.89783	8.90988	8.92176	8.9563	8.94271	8.9575	8.89176	9.1185	8.99744	8.99699	8.87443	8.98773	8.934
1417469_at	5.75738	5.75507	5.78095	5.79336	5.61285	5.69429	5.83761	5.6794	5.89897	6.06823	5.93357	5.98503	5.78913	5.98346	5.98234	5.73256	5.85794
1417470_at	6.80509	7.11709	7.39793	7.06594	7.1591	7.10974	7.12955	7.35367	7.24265	6.95999	7.25017	7.17234	7.24309	7.22488	7.17507	7.0876	7.16063
1417471_s_at	8.95257	8.82643	8.92153	9.08439	8.8555	8.92835	8.93918	9.01099	8.78669	8.9507	8.67763	8.92835	9.04255	8.81564	8.90362	8.90008	9.07843
1417472_at	8.34921	8.35892	8.15618	8.10758	8.19958	8.21107	8.25092	8.1111	8.21614	8.30548	8.22186	8.26093	8.36616	8.36699	8.23272	8.16383	8.26655
1417473_a_at	4.44372	4.55688	4.57764	4.63317	4.22674	4.86323	4.88341	4.66232	4.72797	4.76082	4.34933	4.46526	4.89381	4.42089	4.45975	4.40278	4.64868
1417474_at	9.15556	9.02734	9.01926	9.10098	9.11272	9.07262	9.16084	9.14944	9.1832	9.09326	9.05923	9.17892	9.24248	9.1628	9.02783	9.14251	9.11272
1417475_at	9.11735	9.13847	8.94879	9.03348	8.82644	8.90553	8.88557	9.03529	9.00458	9.06105	9.07114	8.97229	8.88881	8.78299	8.68656	8.73124	8.76981
1417476_at	8.65575	8.81096	8.71569	8.66014	8.63835	8.71279	8.65575	8.62744	8.61231	8.65575	8.36891	8.5091	8.80692	8.59552	8.626	8.66789	8.46181
1417477_at	8.31668	8.23274	8.20544	8.26025	8.20153	8.30904	8.34834	8.33106	8.30209	8.30153	8.25362	8.37508	8.24997	8.02115	8.1633	8.22285	8.21085
1417478_a_at	9.36781	9.26383	9.40316	9.5154	9.47121	9.46309	9.44951	9.38425	9.39714	9.3478	9.16462	9.32559	9.41452	9.38703	9.34284	9.3509	9.40415
1417479_at	5.92522	6.08382	6.12276	6.1268	6.19321	6.07052	6.12533	6.04294	6.08712	6.1268	5.85731	5.75342	6.3431	6.4417	6.23038	6.31884	6.22078
1417480_at	11.0865	11.0186	11.0394	11.0714	10.9991	11.0227	11.0762	11.0793	11.013	10.9329	10.8872	10.9364	11.0046	10.8773	10.8191	10.9183	11.0545
1417481_at	10.9051	10.9725	11.1006	11.168	11.2128	11.0693	11.1272	11.0328	11.0953	11.0764	11.0106	11.1232	11.1686	11.1904	11.0688	11.1061	11.1324
1417482_at	4.20267	4.17042	4.20507	4.34005	4.61403	4.11588	4.34107	4.29903	4.26732	4.22495	4.43557	4.2865	4.04761	4.30269	4.30485	4.28345	4.12864
1417483_at	6.21279	6.19633	6.26008	6.36771	5.88076	6.11441	6.31439	6.4585	6.1133	6.34549	6.29989	6.18406	6.21279	5.98892	6.21279	6.34929	6.2909
1417484_at	3.35757	3.4765	3.4735	3.47517	3.35131	3.34961	3.48029	3.60567	3.54059	3.45168	3.4735	3.5247	3.43811	3.67513	3.4486	3.49374	3.4735
1417485_at	3.86346	3.61641	3.81131	3.76896	3.83366	3.89875	3.86346	4.07582	3.79288	3.86346	3.95423	4.10024	3.98084	3.92689	3.86346	3.81337	3.86346
1417486_at	7.52991	7.62509	7.55341	7.61915	7.67527	7.69892	7.53256	7.56332	7.43443	7.6438	7.37411	7.67309	7.49833	7.12904	7.44941	7.52762	7.5041
1417487_at	5.40434	5.61375	5.74207	5.71616	5.98316	5.7123	5.68257	5.88062	5.79574	5.81035	5.86041	5.86238	5.72745	5.83535	5.81832	5.82184	5.55682
1417488_at	4.41064	4.08471	4.19087	4.42372	4.24291	4.37474	4.40582	4.50698	4.32341	4.37474	4.35475	4.70422	4.19637	4.61387	4.74487	4.5965	4.41585
1417489_at	9.16858	9.09342	9.41713	9.17983	9.06394	9.08191	9.41594	9.19239	9.13779	8.98514	8.92086	8.76379	8.78689	8.60619	9.20184	9.04925	8.99182
1417490_at	12.4495	12.477	12.4165	12.4165	12.4292	12.4937	12.4762	12.3284	12.4031	12.4275	12.3486	12.467	12.4093	12.3435	12.3692	12.4151	12.4274
1417491_at	9.32372	9.31333	9.04905	9.28994	9.12722	9.22276	9.15064	9.0308	9.11971	9.2731	9.07406	9.26169	9.15552	9.03383	9.08505	9.06845	9.15064
1417492_at	9.79805	9.68273	9.7003	9.79412	9.6899	9.76355	9.79176	9.63508	9.57438	9.76324	9.45311	9.57376	9.7259	9.38899	9.67542	9.68003	9.68846
1417493_at	9.79659	9.73195	9.93225	9.87946	9.72817	9.7778	9.95249	9.71982	9.7408	9.79986	9.65325	9.57835	9.83346	9.63868	9.92787	9.77265	9.90623
1417494_a_at	7.72239	7.56672	7.50173	7.77118	7.65391	8.0348	7.5622	7.90926	8.08839	7.5868	7.58121	7.88791	7.49557	7.83828	7.81707	8.04885	7.65349
1417495_x_at	6.83758	6.76657	6.75927	6.90246	6.82313	7.42236	6.77955	7.24864	7.42843	6.79574	6.93063	6.96243	6.68354	6.95432	6.98714	7.10413	6.9351
1417496_at	5.70075	5.48137	5.43334	5.43267	5.68431	5.83819	5.30229	5.94587	5.90461	5.66569	5.31132	5.68431	5.53261	5.81682	5.27622	5.89765	5.67826
1417497_at	5.72062	5.55854	5.67724	5.98371	5.74484	5.91962	5.67623	5.91595	5.97405	5.54309	5.70977	5.75567	5.61173	5.77508	5.61509	5.67387	5.68592
1417498_at	6.21782	6.56656	6.51503	6.36359	6.69723	6.56656	6.56656	6.53383	6.73864	6.52331	6.70937	6.59559	6.47348	6.74259	6.47513	6.60187	6.62961
1417499_at	10.5079	10.659	10.6499	10.6488	10.7737	10.7133	10.6689	10.7326	10.7492	10.6227	10.6674	10.6793	10.7734	10.8191	10.6651	10.676	10.6717
1417500_a_at	7.08701	7.01187	7.01495	7.16057	7.10254	7.33801	7.26854	7.25665	7.25964	7.18708	7.14663	7.35873	7.2367	7.4192	7.21863	7.37695	7.28569
1417501_at	8.66769	8.6633	8.60726	8.73348	8.83694	8.80123	8.65037	8.68924	8.79179	8.59702	8.63345	8.58193	8.72908	8.68944	8.59111	8.51321	8.47151
1417502_at	12.3841	12.5262	12.574	12.4825	12.4898	12.5543	12.6332	12.5617	12.5008	12.5664	12.4444	12.5336	12.5785	12.3125	12.4582	12.516	12.5748
1417503_at	9.22696	9.13617	9.23154	9.23715	9.31699	9.31691	9.2041	9.26081	9.26663	9.19957	9.30435	9.30783	9.22452	9.34971	9.0824	9.17693	9.20089
1417504_at	11.8324	11.7245	11.7787	11.8606	11.82	11.7642	11.8868	11.6788	11.7141	11.732	11.4923	11.8437	11.7779	11.6942	11.8867	11.8206	11.7607
1417505_s_at	8.35127	8.18929	8.33823	8.42542	8.35481	8.43617	8.37372	8.40869	8.63424	8.44992	8.44348	8.51489	8.64307	8.51034	8.46662	8.62426	8.40095
1417506_at	6.31296	5.89718	6.36736	6.37443	6.34824	6.25103	6.24648	6.33165	6.30789	6.24451	6.40051	6.37881	6.5485	6.40936	6.33165	6.33165	6.40283
1417507_at	9.55854	9.45312	9.37395	9.54249	9.25342	9.46828	9.30331	9.47125	9.40721	9.41005	9.22566	9.40392	9.3604	9.41923	9.03247	9.3213	9.54431
1417508_at	9.50854	9.39098	9.3974	9.46389	9.44633	9.23388	9.43877	9.46714	9.48794	9.53587	9.47389	9.35308	9.44691	9.4689	9.49083	9.43877	9.50641
1417509_at	8.08358	8.14062	8.36138	8.16203	8.34901	8.20497	8.18731	8.22565	8.21624	8.58027	8.37531	8.26783	8.37664	8.32711	8.28433	8.25955	8.18501
1417510_at	10.3489	10.4339	10.3993	10.4525	10.3394	10.477	10.3964	10.1919	10.2665	10.3682	10.2496	10.3844	10.3776	10.2136	10.321	10.3221	10.378
1417511_at	8.07477	8.1101	7.92906	8.05406	8.02318	8.11872	8.07477	8.04637	8.11698	8.09401	7.87527	8.11555	8.26647	8.05394	8.18214	7.83386	8.07752
1417512_at	8.79717	8.67995	8.69868	8.89147	8.54672	8.70562	8.69726	8.74528	8.67736	8.67519	8.34079	8.59037	8.6613	8.44026	8.63426	8.54246	8.734
1417513_at	10.1804	10.0182	10.0914	10.1731	10.0378	9.83341	10.1276	9.95936	9.92518	10.1605	9.99212	10.1433	10.1105	10.015	10.0999	9.80691	10.0814
1417514_at	9.52216	9.63574	9.60192	9.54177	9.71043	9.71448	9.66614	9.50945	9.48301	9.48566	9.27428	9.42996	9.48492	9.2013	9.37807	9.42815	9.35708
1417515_at	8.46839	8.28273	8.34515	8.44301	8.39914	8.45273	8.49912	8.57873	8.56506	8.47081	8.44301	8.47345	8.46411	8.53644	8.21725	8.36757	8.49687
1417516_at	8.51957	8.47187	8.58883	8.69756	8.76057	8.61779	8.62815	8.63291	8.69326	8.58049	8.58904	8.83533	8.76071	8.8691	8.57936	8.5692	8.71281
1417517_at	5.90491	6.18217	6.00101	6.30597	5.71884	6.07399	6.13769	6.09448	5.95582	6.13037	6.37545	6.09074	6.20442	5.92855	6.08955	6.10944	6.1164
1417518_at	5.37189	5.22267	5.38948	5.20064	5.3405	5.5215	5.47282	5.42954	5.5495	5.41595	5.59192	5.50095	5.75152	5.41034	5.59124	5.62547	5.45819
1417519_at	6.00987	6.07915	6.09752	6.18871	5.64249	5.73463	5.95121	5.75906	5.89175	6.00902	6.09643	5.78588	6.04889	6.04078	6.14095	5.80173	5.96964
1417520_at	6.13491	6.05989	5.80845	6.04926	5.89021	6.31715	5.68199	5.9854	5.90238	5.81783	5.81196	5.56969	5.47389	5.69555	5.78952	5.65409	5.88403
1417521_at	5.90415	6.06416	5.98649	5.86515	6.11872	6.02407	5.98399	5.99842	6.05796	5.88145	5.96616	6.20987	6.12058	5.98514	6.03679	5.993	5.97215
1417522_at	6.01683	6.04755	6.02534	5.83511	5.97253	5.95582	6.05618	5.96092	5.64421	5.9308	5.92558	5.95664	5.95582	5.96289	6.10326	5.72352	5.95582
1417523_at	6.0283	6.14749	6.36829	5.79157	6.22865	6.29436	6.2909	6.07516	6.32791	6.04214	6.04694	6.10513	6.12695	5.96449	6.06388	6.2941	6.14749
1417524_at	11.5063	11.7929	11.7059	11.4264	11.605	11.5938	11.6682	11.5658	11.6297	11.7857	11.6502	11.6368	11.7733	11.5292	11.8036	11.646	11.533
1417525_at	6.14948	6.14531	6.33261	5.9974	6.29603	6.33432	6.24571	6.02162	6.29093	6.07253	6.37477	6.77358	6.17126	6.31807	6.12259	6.60867	6.17056
1417526_at	10.5153	10.6675	10.5446	10.5377	10.5792	10.5581	10.4925	10.2631	10.4133	10.5356	10.4364	10.6063	10.5661	10.3366	10.3289	10.4925	10.3186
1417527_at	10.7926	10.7705	10.624	10.7628	10.723	10.7405	10.6727	10.6147	10.6605	10.8214	10.731	10.8547	10.7402	10.5863	10.6159	10.7438	10.7221
1417528_at	6.64156	6.62279	6.60378	6.64156	6.55077	6.74073	6.6323	6.64969	6.68244	6.58545	6.82805	7.03567	6.7859	6.72319	6.64156	6.64156	6.59743
1417529_at	9.9792	9.89106	9.90691	9.95455	10.052	10.0282	9.99382	9.93344	9.96966	9.78866	9.68093	9.7482	9.85861	9.67432	9.77474	9.70734	9.83876
1417530_a_at	10.4546	10.2991	10.6836	10.7279	10.6157	10.6433	10.6876	10.6565	10.6157	10.5921	10.2877	10.3662	10.6293	10.5243	10.8167	10.63	10.5981
1417531_at	3.67217	3.86189	3.55753	3.76971	3.86417	3.72384	3.63813	3.64407	4.02048	3.91663	3.77063	4.02004	3.77258	3.91523	3.75123	4.04624	3.53488
1417532_at	3.86285	3.58296	3.4853	3.65206	3.82532	3.6751	3.67708	3.67708	3.86107	3.86916	3.67708	3.74683	3.50546	3.79301	3.6255	3.67708	3.61063
1417533_a_at	8.88134	8.77374	8.60511	8.80448	8.71997	8.69368	8.90541	8.80586	8.80342	8.72714	8.84973	8.85637	8.82363	8.9006	8.59866	8.80627	8.78149
1417534_at	8.4532	8.39517	8.44232	8.36358	8.42506	8.43906	8.54692	8.40984	8.4532	8.45358	8.54025	8.51298	8.48074	8.60761	8.4532	8.46992	8.44642
1417535_at	10.2087	10.1226	10.108	10.2734	10.101	10.0766	10.2049	10.2366	10.2754	10.1808	9.98868	10.185	10.1065	10.0056	10.1542	10.1156	10.1307
1417536_at	10.9219	10.9141	11.0018	10.9819	11.1293	11.0242	10.9967	11.06	11.1049	10.9478	11.0229	10.9986	11.0231	11.0227	10.9683	10.974	10.9438
1417537_at	6.12734	6.39881	6.39881	6.35899	6.35444	6.36499	6.21043	6.43196	6.39703	6.40105	6.53857	6.41585	6.39881	6.23765	6.45886	6.60834	6.45908
1417538_at	8.2292	8.26865	8.19623	8.26071	8.24717	8.28926	8.14412	8.13258	8.20138	8.27222	8.12848	8.24297	8.42757	8.3805	8.1923	8.2126	8.23681
1417539_at	7.96418	8.00556	7.9785	8.05005	7.93025	8.17269	8.09619	7.87799	8.02434	8.15068	7.92021	8.09398	8.11832	8.15952	7.85236	8.00411	7.92546
1417540_at	5.49024	5.55729	5.17744	5.401	5.21957	5.40862	5.32941	5.32941	5.43051	5.07796	5.25465	5.32941	5.38141	4.99308	5.40796	5.24669	5.18792
1417541_at	4.20992	4.49859	4.20475	4.27544	4.31002	4.46521	4.1393	4.20992	4.09781	4.20992	3.97984	4.17848	4.3534	3.91902	4.21602	4.24507	4.09859
1417542_at	10.3224	10.2802	10.1366	10.3009	10.2126	10.1955	10.1681	10.1279	10.1348	10.3375	10.3044	10.31	10.2926	10.1624	10.1333	10.1589	10.2465
1417543_at	7.43428	7.53369	7.42411	7.55396	7.56222	7.39147	7.45194	7.48963	7.38748	7.61741	7.27943	7.50466	7.57461	7.4252	7.46835	7.63076	7.44813
1417544_a_at	9.69232	9.93419	9.86234	9.7608	9.74451	9.89964	9.72844	9.67268	9.73651	9.76704	9.66704	9.76213	9.9004	9.55394	9.77887	9.73432	9.6783
1417545_at	5.54763	5.53665	5.56212	5.39918	5.68472	5.46865	5.48902	5.39091	5.7102	5.56131	5.54943	5.98946	5.12076	6.11515	5.26679	5.70542	5.47177
1417546_at	4.93459	5.14074	4.78434	4.82246	5.02085	5.02746	5.10507	5.0763	5.09672	5.02085	4.98478	5.19556	4.86503	5.14488	5.09571	5.05308	4.99777
1417547_at	8.61755	8.75157	8.65751	8.64794	8.6741	8.62618	8.58938	8.54508	8.57001	8.68052	8.73383	8.59852	8.74195	8.69592	8.589	8.75462	8.61354
1417548_at	6.8113	6.50583	6.9012	6.58123	6.85367	6.81838	6.77729	6.75707	6.80833	6.99276	6.83329	6.90142	7.00868	6.47645	6.61204	6.91116	6.58385
1417549_at	7.82015	7.90296	7.94782	8.24705	8.09935	8.06729	8.00539	7.88467	7.98283	8.07437	7.85507	7.74514	8.15698	8.09128	8.12277	7.97164	8.34381
1417550_a_at	4.10865	4.16958	4.37049	4.07945	4.17174	4.21807	4.21098	4.21807	4.30133	4.07008	4.32956	4.31837	4.5908	4.19673	3.97767	4.32941	4.26283
1417551_at	6.47513	6.79316	6.76279	6.79316	6.69235	6.79606	6.96207	6.97044	6.80607	6.80508	6.81962	6.86368	6.53283	6.77567	6.66318	6.78246	6.75003
1417552_at	4.42825	4.60238	4.72508	4.85947	4.86007	4.5102	4.57859	4.88545	5.27956	4.80073	4.6687	4.82433	4.53633	4.99808	4.57952	4.80512	4.77321
1417553_at	4.77336	4.83473	4.81366	4.67555	4.85637	5.00162	4.83473	4.84603	4.9819	4.81187	4.74931	5.12717	4.56872	4.93982	4.88545	5.17445	4.84302
1417554_at	4.02458	4.08471	4.01578	3.98981	4.36366	4.36172	4.03376	4.16496	4.16496	4.1834	4.20582	4.52781	4.1624	4.37227	4.16496	4.04425	4.16496
1417555_at	7.58668	7.45715	7.53371	7.63586	7.77402	7.55489	7.4069	7.55634	7.6627	7.40603	7.39198	7.59771	7.4403	7.75577	7.39892	7.53322	7.5726
1417556_at	3.93915	3.98306	3.75002	3.70125	3.92275	3.75831	3.65215	3.72846	3.7314	3.65104	3.75831	3.7826	3.72034	3.73384	3.81785	3.63192	3.98861
1417557_at	9.82932	9.90303	9.83611	9.88035	9.92179	9.95488	9.79424	9.69378	9.76422	9.83142	9.80502	9.9024	9.875	9.83932	9.88617	9.83056	9.7761
1417558_at	10.6603	10.6881	10.4816	10.5849	10.4942	10.3942	10.5397	10.4016	10.4186	10.5838	10.4532	10.4464	10.4352	10.2511	10.4622	10.4166	10.3406
1417559_at	10.2281	10.2342	10.1158	10.2405	10.2335	10.1666	10.1519	10.1653	10.1491	10.1585	9.98656	10.1259	10.1821	10.0195	10.1103	10.1666	10.0293
1417560_at	10.2536	10.2426	10.1074	10.1765	10.0954	10.1614	10.1027	9.9303	9.95102	10.0709	9.90892	10.1071	10.1968	10.0327	10.0753	10.0285	10.0941
1417561_at	5.17621	5.24138	5.38412	5.31083	5.36676	5.34148	5.24693	5.27826	5.47302	5.37675	5.34148	5.31509	5.55477	5.47563	5.38885	5.59668	5.27407
1417562_at	6.52663	6.48025	6.43107	6.46364	6.63752	6.58898	6.52663	6.63858	6.56202	6.49512	6.70114	6.74174	6.36785	6.52894	6.52663	6.52663	6.44066
1417563_at	5.71616	5.77697	5.69242	5.53665	5.75414	5.65504	5.39972	5.71616	5.67163	5.92541	5.66802	5.97514	5.82974	5.6895	5.67715	5.83324	5.72589
1417564_at	8.76605	8.94268	8.89972	8.96167	9.10476	9.03428	8.96795	8.87191	8.84454	8.90676	8.9462	8.97623	9.07702	8.98854	9.05229	8.85756	8.98559
1417565_at	8.17512	8.07594	8.04459	8.23269	8.12417	8.1037	8.09828	7.97353	7.94451	8.06125	7.92246	8.13513	7.97437	8.05341	8.18554	8.02345	8.19866
1417566_at	6.63862	6.71336	6.86038	6.77918	6.64698	6.8243	6.71211	6.86869	6.88972	6.71211	6.74309	6.61527	6.71211	6.5798	6.69126	6.51102	6.68625
1417567_at	8.95795	9.21458	9.03711	9.1108	9.10338	9.17525	8.98781	8.82115	8.92766	9.12227	8.97994	9.09022	9.12812	9.06534	9.0689	9.03684	8.89061
1417568_at	12.3402	12.2949	12.2894	12.3848	12.3723	12.333	12.2999	12.0665	12.1918	12.3235	12.1645	12.2418	12.319	12.1401	12.3026	12.3342	12.2591
1417569_at	11.937	11.8459	11.976	11.8634	11.9148	11.7622	11.8456	11.8339	11.89	11.874	11.8982	11.9391	11.8549	11.7482	11.8055	11.7842	11.978
1417570_at	8.26857	8.19544	8.35908	8.30708	8.32986	8.29426	8.34384	8.21791	8.1797	8.38891	8.14077	8.3033	8.31209	8.07973	8.29426	8.45005	8.24154
1417571_at	8.06626	7.83891	8.00735	8.00735	8.04511	7.98225	8.01932	8.08687	8.04265	7.94547	7.95429	7.76777	7.98543	8.05028	7.93861	7.93575	7.83708
1417572_at	6.5874	6.70352	6.65505	6.70548	6.69085	6.74115	6.41069	6.45013	6.6489	6.60957	6.53509	6.51594	6.71557	6.6115	6.79857	6.5626	6.6115
1417573_at	10.2921	10.3025	10.3425	10.4155	10.2829	10.3397	10.2935	10.3253	10.3742	10.2959	10.271	10.3025	10.296	10.2958	10.1688	10.2162	10.2972
1417574_at	8.98856	8.83982	8.73073	8.89668	8.76874	8.8657	8.91773	8.90012	8.89521	8.46543	8.68367	8.76668	8.64519	8.5339	8.60738	8.39626	8.93427
1417575_at	9.34502	9.2807	9.40384	9.36288	9.3938	9.23703	9.38883	9.43711	9.49489	9.68116	9.65992	9.57406	9.68284	9.65255	9.53858	9.56544	9.6163
1417576_a_at	7.90862	7.71788	8.00488	7.81048	8.17176	7.92511	8.15222	8.06429	8.17484	8.38328	8.08859	8.3189	8.38943	7.92835	8.0938	8.33342	8.13607
1417577_at	6.44336	6.40687	6.56313	6.438	6.41081	6.41081	6.28567	6.41081	6.51008	6.42263	6.75375	6.2807	6.53483	6.55894	6.1082	6.1561	6.43925
1417578_a_at	8.4898	8.46147	8.41986	8.45004	8.43347	8.38997	8.54535	8.54926	8.59383	8.53305	8.57174	8.49293	8.63306	8.38337	8.47187	8.48558	8.33125
1417579_x_at	8.13338	8.16301	8.05841	8.05729	8.05981	7.99747	8.02067	8.05729	8.09848	8.17628	8.09811	8.13249	8.13863	7.90817	7.86798	8.07449	7.95887
1417580_s_at	7.68972	7.56728	7.50976	7.69156	7.60897	7.81988	7.52783	7.65	7.77609	7.64276	7.50951	7.60393	7.55832	7.65036	7.48035	7.84892	7.58332
1417581_at	7.61032	7.55826	7.66722	7.65425	7.51641	7.57806	7.69851	7.68579	7.51568	7.4517	7.59938	7.41645	7.56138	7.45758	7.51869	7.36373	7.64139
1417582_s_at	7.90932	7.85442	7.85332	7.90157	7.76924	7.84787	7.93301	7.85332	7.86694	7.97044	7.63757	7.82024	7.86382	7.62225	7.8912	7.67979	7.82986
1417583_a_at	8.9192	8.82861	8.8596	9.05402	9.02212	9.0804	8.96172	8.92368	8.91276	8.93699	8.68596	8.89649	8.86488	8.83685	9.08865	8.92368	8.92368
1417584_at	6.64995	6.60285	6.44787	6.62194	6.62446	6.6228	6.62446	6.5338	6.58733	6.53645	6.7523	6.66197	6.60573	6.89987	6.48017	6.79898	6.666
1417585_at	8.03804	8.12721	7.93045	8.0927	7.80196	7.86582	7.92043	8.06375	7.8149	8.12133	8.11074	8.07675	7.76347	7.92043	7.82063	7.92043	7.8231
1417586_at	6.39672	6.50185	6.34964	6.46364	6.3425	6.53464	6.28758	6.34446	6.44374	6.43003	6.50088	6.62565	6.54676	6.61111	6.32087	6.48392	6.44374
1417587_at	4.69436	4.77971	4.95695	4.88545	4.56473	4.80623	4.96066	5.0282	4.85684	4.9481	5.13246	4.99127	4.86367	5.00329	4.66045	5.02594	4.76914
1417588_at	5.89884	5.76738	5.84073	5.72367	5.82412	5.79616	5.65469	5.84073	6.03382	5.81856	6.02911	5.84073	6.22191	6.10614	5.95766	5.66926	5.79321
1417589_at	3.62503	3.71768	3.55399	3.44852	3.59085	3.41615	3.54309	3.6303	3.68201	3.88353	3.41157	3.58178	3.43166	3.39999	3.36141	3.60121	3.43378
1417590_at	6.30581	6.37227	6.38976	6.59345	6.21279	6.55307	6.14651	6.53496	6.582	6.38098	6.42157	6.37227	5.95227	6.46461	6.37227	6.31443	6.12944
1417591_at	8.39212	8.35374	8.39884	8.50591	8.36305	8.4366	8.36928	8.19558	8.2969	8.34824	8.25957	8.26158	8.38295	8.30283	8.26481	8.15219	8.40945
1417592_at	10.1148	10.0059	9.8557	10.0298	9.86638	9.77485	9.92646	9.87237	9.8192	9.97449	9.74616	9.75273	9.80568	9.60821	9.7503	9.86323	9.87862
1417593_at	10.0018	9.98495	10.0756	10.0362	10.0656	10.0577	10.0574	10.0555	10.1079	10.0785	9.93666	10.1971	10.0867	10.1486	10.0132	9.98938	10.0451
1417594_at	9.02278	8.88413	8.83291	9.04112	8.87026	8.94554	8.84591	8.91411	8.80344	8.87422	8.73656	8.79988	8.91078	8.75426	8.74371	8.87422	8.89998
1417595_at	6.25023	6.23315	6.45852	6.34294	6.46768	6.31196	6.35019	6.43882	6.34148	6.14295	6.57475	6.64329	6.33171	6.48504	6.33171	6.3204	6.21156
1417596_at	7.67097	7.71676	7.75491	7.88031	7.82478	7.81527	7.75747	7.8571	7.90243	7.78233	7.7885	7.97896	8.11753	8.01069	7.82478	7.8881	7.71093
1417597_at	3.69946	3.45838	3.7373	3.55974	3.67996	3.73268	3.45002	3.8944	3.80742	3.70758	3.49573	3.75886	3.75009	3.60428	3.73563	3.67534	3.5728
1417598_a_at	9.17807	9.20898	9.17578	9.28315	9.24451	9.1844	9.16847	9.1817	9.24634	9.17238	8.86369	9.13754	9.21166	9.16576	9.32558	9.07039	9.19017
1417599_at	6.79932	7.12258	6.83862	6.81655	6.79926	6.88998	6.71939	6.79926	6.90527	6.7976	6.57616	6.76607	6.54651	6.74418	7.03927	6.66574	6.77445
1417600_at	8.61353	8.67165	8.73696	8.39797	8.37432	8.61581	8.45767	8.43098	8.43386	8.90291	8.01394	8.42308	8.80883	8.50955	8.67311	8.19634	8.1269
1417601_at	4.05358	4.04876	4.23684	4.21499	4.23505	4.21283	4.31219	4.21914	4.29051	4.06441	4.16546	4.11523	4.2042	4.23505	4.22037	4.31598	4.35695
1417602_at	7.97062	7.87035	7.89552	7.90395	7.46342	7.62902	7.9214	7.81084	7.50915	7.86325	7.61565	7.67833	8.01383	7.47175	7.84661	7.79762	7.99017
1417603_at	6.52273	6.35393	6.20349	6.36529	6.4448	6.47491	6.29106	6.22465	6.28634	6.40461	6.39428	6.2068	6.69026	6.46932	6.3045	6.46223	6.36529
1417604_at	7.78902	7.91745	7.86083	8.17688	7.83546	8.14408	7.85548	7.93466	7.93466	7.94951	7.57342	8.1233	8.06618	7.94661	8.00013	7.69163	7.9388
[truncated: 43,167 more rows]
