# Supplementary material for: Relationship between circadian genes and memory impairment caused by sleep deprivation
Source: PeerJ. 2022 Mar 21;10:e13165. doi: 10.7717/peerj.13165 (PMC8944342; doi:10.7717/peerj.13165)
Supplement: Supplemental Information 8 [file peerj-10-13165-s008.xlsx]

## Sheet: Sheet1
The numbers of crossing the platform
Control	SD
3	2
2	1
3	1
2	1
6	1
The time to escape to the platform
Control	SD
12.5	33.3
10.1	33.9
6.7	46.5
14.7	31.3
5.9	52.7
